# Supplementary material for: Quantitative Proteomic Analysis Reveals Novel Insights into Intracellular Silicate Stress-Responsive Mechanisms in the Diatom Skeletonema dohrnii
Source: MDPI journal article supplement (doi:10.3390/ijms20102540), 2019-05-23

Title: Quantitative Proteomic Analysis Reveals Novel Insights into Intracellular Silicate Stress-Responsive Mechanisms in the Diatom *Skeletonema dohrnii*

Authors: Thangaraj Satheeswaran, Shang Xiaomei, Sun Jun\*, Liu Haijiao

**Figure S1.** An iPath metabolic biochemistry map of protein expressed and identified as down-regulated in the Si-limited and Si-added cells of *S. dohrnii*

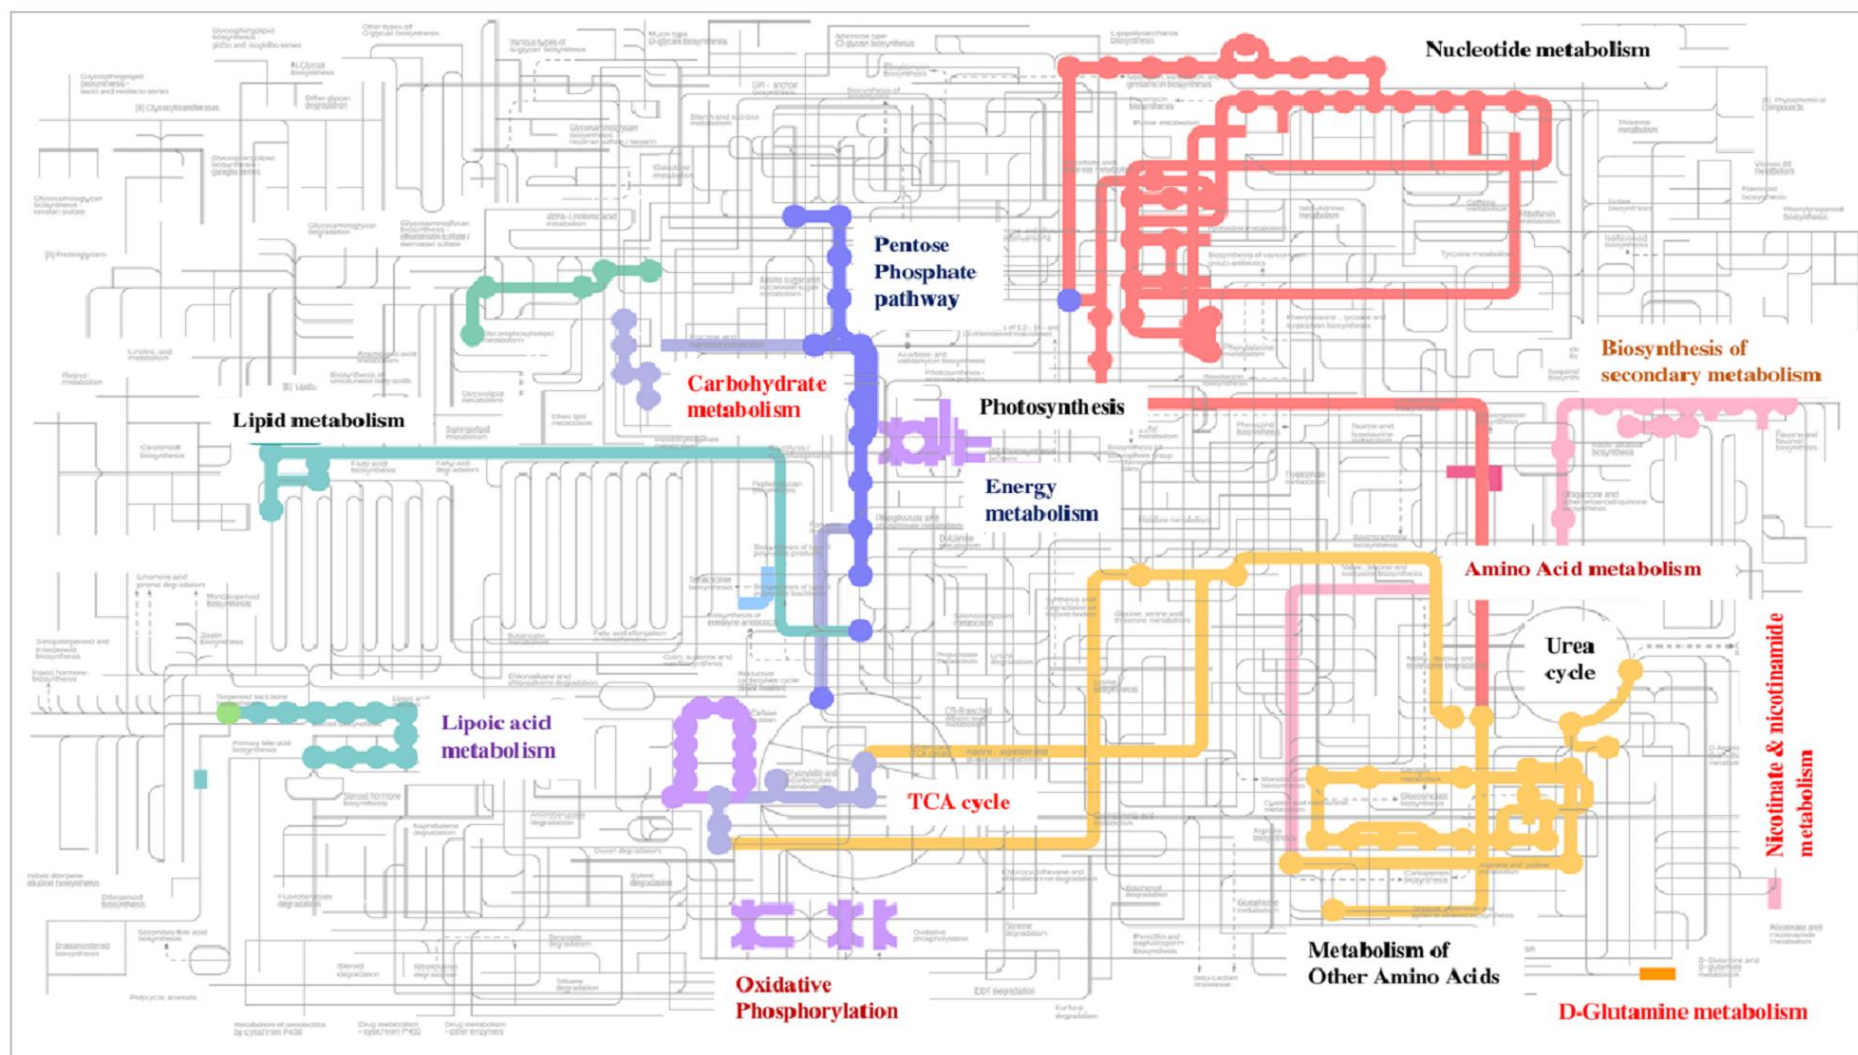

Supplement: s1 [file s1]
