# Supplementary material for: Quantitative Proteomic Analysis Reveals Novel Insights into Intracellular Silicate Stress-Responsive Mechanisms in the Diatom Skeletonema dohrnii
Source: Int J Mol Sci. 2019 May 23;20(10):2540. doi: 10.3390/ijms20102540 (PMC6566588; doi:10.3390/ijms20102540)
Supplement: Supplementary file 1 [file ijms-20-02540-s001.zip]

Archive with 5 entries (5 files):
- IJMS-Figure S1.pdf
- IJMS-Table S1.xlsx
- IJMS-Table S2.xlsx
- IJMS-Table S3.xlsx
- IJMS-Table S4.xlsx
