# Supplementary material for: Quantitative Proteomic Analysis Reveals Novel Insights into Intracellular Silicate Stress-Responsive Mechanisms in the Diatom Skeletonema dohrnii
Source: Int J Mol Sci. 2019 May 23;20(10):2540. doi: 10.3390/ijms20102540 (PMC6566588; doi:10.3390/ijms20102540)
Supplement: Supplementary file 1 [file ijms-20-02540-s001.zip › IJMS-Table S1.xlsx]

## Sheet: Table S1
Title	Quantitative Proteomic Analysis Reveals Novel Insights into Intracellular Silicate Stress-Responsive Mechanisms in the Diatom Skeletonema dohrnii
Authors	Thangaraj Satheeswaran, Shang Xiaomei, Sun Jun*, Liu Haijiao
Table S1	Annotated details of identified proteins
No	Protein_ID	Group_ID	Protein_Mass	PeptideSeqs	PepIsUniqe	Unique_Peptide_Num	Unique_Spectra_Num	Peptide_Query	Sameset	Description	ratio_113/115	n.spectra_113/115	pvalue_113/115	qvalue_113/115	ratio_113/116	n.spectra_113/116	pvalue_113/116	qvalue_113/116	ratio_114/115	n.spectra_114/115	pvalue_114/115	qvalue_114/115	ratio_114/116	n.spectra_114/116	pvalue_114/116	qvalue_114/116	ratio_117/119	n.spectra_117/119	pvalue_117/119	qvalue_117/119	ratio_117/121	n.spectra_117/121	pvalue_117/121	qvalue_117/121	ratio_118/119	n.spectra_118/119	pvalue_118/119	qvalue_118/119	ratio_118/121	n.spectra_118/121	pvalue_118/121	qvalue_118/121	ratio_113/117	n.spectra_113/117	pvalue_113/117	qvalue_113/117	ratio_113/118	n.spectra_113/118	pvalue_113/118
1	XP_002292183.1	998	31154.9	DDGLAAGIASVATR;TDGRPLNAR;VYVEDGALR;SETIQGGALR;TFNAVIGTPR;IELLQGPNNNK;VGGGMDWPDDGLMIGR;NIGQLEFPLDAVVRPDR;QVVELYTEDGLDRPFFAIVETPGSGNVVR;TYPFNPTVDSVAIILK;VVNTAPVEFPLYASVDAYR;DLAEIWDNSSPVIVQGGSLR;TWSFANPAIESVQVLLK;NIGQLEFPLDAVVRPDRDDGLAAGIASVATR	1;0;1;0;0;0;1;0;1;1;1;1;1;1	9	91	41867;192991;192999;193004;193005;193006;193013;193017;96453;102740;195480;195487;195500;195502;195508;195510;105743;118632;118635;118636;118641;248049;248051;248053;248055;248056;248057;248061;274200;274201;274203;274207;314569;314570;314572;314573;314576;314577;314580;314582;325495;367891;367892;367893;367894;367896;367897;367898;367899;367900;369371;369372;369373;329778;329781;329787;329788;32…	EED90158.1	predicted protein [Thalassiosira pseudonana CCMP1335]	1.49694	91	0.0001	0.00219734	0.944268	87	0.0029997	0.0403393	1.60275	91	0.0001	0.00211861	1.01795	84	0.515448	0.825195	1.43108	88	0.0001	0.00219734	1.15608	86	0.00019998	0.00281222	1.11964	90	0.0001	0.00367718	0.91026	86	0.00389961	0.0292633	1.27917	90	0.0001	0.0035271	1.64841	91	0.0001
2	ACI64758.1	40	53392.6	IGLFGGAGVGK;TIAMESTDGLVR;VVDLLAPYAK;FTQAGSEVSALLGR;AALVYGQMNEPPGAR;LVLEVAQHLGENTVR;AIAELGIYPAVDPLDSTSR;IPSAVGYQPTLATDMGGLQER;FMSQPFHVAEVFTGTAGK;EGNDLYHEMIEGGVIK;GLQDIIAILGMDELSEDDKLVVSR;GSITSVQAVYVPADDLTDPAPATTFAHLDATTVLSR	0;1;1;0;1;1;1;1;1;1;1;1	10	85	37083;182848;182850;182851;182856;182857;182858;182859;182862;182863;186635;212560;212563;212564;212565;212566;212567;212568;212569;222866;222870;222884;222886;222887;222891;222892;222893;222894;222897;222898;222903;254310;254312;254313;254314;254315;254316;254317;254318;254319;254320;254321;254326;257407;257408;257410;257414;257420;257423;257424;257425;257427;307124;307125;308976;308977;274688;2…	XP_002296041.1;EJK52995.1	F-type H-ATPase beta subunit [Thalassiosira pseudonana CCMP1335]	1.04964	83	0.130387	0.38708	1.01477	85	0.565743	0.833581	1.06078	85	0.191081	0.490223	1.07161	83	0.0273973	0.160292	1.1883	85	0.0001	0.00219734	1.12131	83	0.00029997	0.0038845	1.08367	84	0.00019998	0.00621317	1.03704	83	0.358464	0.662148	1.02872	79	0.260474	0.618196	1.09539	84	0.00419958
3	EED88699.1	1039	42701	DQIYDIFK;TLQGGVHVVVGTPGR;QFYIAVER;VLITTDLLAR;ELAQQIQK;ECQSLILAPTR;GVAINFLTEGDVR;TATFAIGTLAK;VDWLQEQMQER;DLIAQAQSGTGK;KDELTLEGIK;KGVAINFLTEGDVR;KVDWLQEQMQER;GFKDQIYDIFK;GIDVQQVSLVINFDLPTNR;GIYAYGFEKPSAIQQR;FLPESVQVCLFSATMPLDVLEVTQR	1;1;1;1;1;1;1;1;1;1;1;1;1;1;1;1;1	17	80	7112;200585;200588;200589;200590;200591;200598;200599;200600;65169;232730;103927;103929;103937;196512;130676;130677;130678;130680;177042;177054;177055;177058;177059;177064;177066;185121;185132;185133;185143;185151;185162;185168;185169;185179;211930;211931;211932;211933;213814;213819;228958;228960;228961;228963;236379;236382;236383;236394;288122;288123;288125;288126;288127;299309;299310;299311;299…	XP_002293690.1	eukaryotic translation initiation factor 4A [Thalassiosira pseudonana CCMP1335]	1.13046	77	0.0001	0.00219734	1.11764	80	0.0001	0.00353298	1.14058	79	0.00059994	0.00806337	1.14448	79	0.0001	0.00261133	0.772802	79	0.0001	0.00219734	1.44886	79	0.0001	0.0016362	0.962889	79	0.0361964	0.219616	1.80584	79	0.0001	0.00166743	0.840549	78	0.0001	0.0035271	0.657455	80	0.0001
4	EED93536.1	1322	56066.7	TLDQYYAR;SGQVLEVSGSR;FVSQGPYQAR;DLHVLVILTDMSSYADALR;KTLDQYYAR;GIFPPINVLPSLSR;LALTTAEYLAYER;YAEIVNLTLGDGTTR;TALFLNLANDPTIER;GYPGYMYTDLSTIYER;IPIFSAAGLPHNEVAAQIAR;AVVGEEALSMEDHLYLSFLER	1;1;1;1;1;1;1;1;1;1;1;1	12	79	105106;105107;197519;131739;131778;142353;142356;142367;196825;334120;335425;335426;229107;229110;240468;240480;240482;240483;240484;240485;240486;240487;240488;240491;240492;240499;240502;240503;240504;240506;240508;240510;240511;241303;241304;241305;241309;241310;241313;241314;241315;241320;298457;298458;264083;276513;276515;276516;276517;276519;276520;276521;276522;276523;276524;276526;313199;…	XP_002289999.1	vacuolar ATPase [Thalassiosira pseudonana CCMP1335]	1.31333	77	0.0001	0.00219734	1.31274	79	0.0001	0.00353298	1.20426	78	0.0001	0.00211861	1.23685	77	0.0001	0.00261133	0.86534	79	0.0001	0.00219734	1.05326	79	0.211379	0.476794	0.963345	78	0.0530947	0.285602	1.18117	78	0.0001	0.00166743	1.47397	79	0.0001	0.0035271	1.35706	79	0.0001
5	EED91276.1	1123	92720.8	TVIMMGR;FSVSPVVR;VSDPVVSFR;GMGQIMPTAR;GVNYLLEIK;LWGDWYFDAGR;TTLTDSLVQK;SMSVIAHVDHGK;DGIPEISQYLDK;DGIPEISQYLDKL;VDTLYNGPLDDATATAIR;ALLELQLPAEELYQAFCR;IWAFGPEGTGPNLFVDTTK;VTDGALVVVDTIDGVCVQTETVLR;KIWAFGPEGTGPNLFVDTTK;YTEQVADVPAGNTCALVGVDQYLLK	1;1;1;1;1;1;1;1;1;1;1;1;1;1;1;1	16	76	47826;66820;66821;66822;66825;98038;98046;98047;98051;114231;114232;114237;114238;114240;114241;114242;119133;202459;202482;202488;202491;202492;202496;202497;270804;270805;210552;210553;210556;276881;216698;216702;216703;216704;216706;256408;256425;259689;259693;259695;275406;275409;275410;275411;275413;275414;275417;294661;294666;294670;294671;294672;294673;294675;294676;294677;294678;294679;29…	XP_002291169.1	translation factor tu domain 2 [Thalassiosira pseudonana CCMP1335]	1.28423	75	0.0001	0.00219734	1.08262	74	0.0049995	0.0581232	1.1379	70	0.0177982	0.102085	0.9871	68	0.722128	0.905414	0.883378	71	0.0009999	0.0120121	1.44546	73	0.0001	0.0016362	0.949073	67	0.0936906	0.391646	1.37041	75	0.0001	0.00166743	0.699893	76	0.0001	0.0035271	0.703714	74	0.0001
6	YP_004072575.1	507	56392.6	RMPAFFETFPVILVDK;VHTVVLNDPGR;QGMFVMPFMTR;GDGIAEAWLGHPIFR;KAQLGEVFEFDR;LAFYDYIGNNPAK;MPAFFETFPVILVDK;YSIEQVGVTVDFYGGK;YQWDSGYFQQEIER;SGPMDKGDGIAEAWLGHPIFR;MPAFFETFPVILVDKDGIIR;RMPAFFETFPVILVDKDGIIR	1;1;1;1;1;1;1;1;1;1;1;1	12	75	86132;340188;341382;341385;341387;341388;341389;341393;341397;341398;159636;204342;208331;208332;208333;208334;208335;208336;212292;212293;212295;212296;267227;267228;267229;267230;267231;267232;267234;267242;267243;267244;267245;267249;267253;267257;267261;286255;286256;286257;286258;286259;286260;286261;286262;286263;286264;286269;293732;293755;293756;293757;330896;327512;329049;329060;328220;3…	XP_002297545.1;ABK20730.1;YP_874507.1;ADB27529.1;EED86185.1	photosystem II CP47 chlorophyll apoprotein (chloroplast) [Thalassiosira oceanica CCMP1005]	0.52897	75	0.0001	0.00219734	0.737208	74	0.0001	0.00353298	0.417813	74	0.0001	0.00211861	0.604235	74	0.0001	0.00261133	0.824213	73	0.0001	0.00219734	0.665938	69	0.0001	0.0016362	0.775967	74	0.0001	0.00367718	0.583193	74	0.0001	0.00166743	1.26713	73	0.0001	0.0035271	1.3672	75	0.0001
7	EED96258.1	73	90129.3	EMIELPLR;MEELSLFR;GPELLTMWFGESEANVR;KGDLFLVR;GVLLYGPPGSGK;GVLFYGPPGCGK;DLAQYASFAQTLQQSR;LDQLIYIPMPDYESR;AVANECQANFISVK;VMNQLLTEMDGVGAK;FTGADLTEICQSACK;NAPAIIFIDEIDSIAPK;QAAPCVLFFDELDSIAQQR;SVSDRDLAQYASFAQTLQQSR;ETHGFVGADIAALCTEAAMQCIR;AVANETGAFFFLINGPEIMSK;VVETDPAPYCIVAPDTVIHCEGEPVKR	1;1;1;1;1;0;1;1;1;1;1;1;1;1;1;1;1	16	60	96719;96720;96724;96725;96726;96727;101174;101175;101184;101185;101198;101200;103585;103586;108220;108243;108244;157550;315888;315892;173967;173970;226124;226129;226138;226142;226143;226144;226145;226179;250627;250631;250632;250637;299881;299890;299891;303854;303858;304134;304135;304141;304142;310950;310956;310957;312867;312871;322040;322041;322044;322045;322047;334074;339734;349607;349609;349610…	XP_002286617.1	hypothetical protein THAPSDRAFT_267952 [Thalassiosira pseudonana CCMP1335]	1.10904	59	0.0029997	0.0289062	1.02976	60	0.309069	0.677546	0.943604	59	0.124988	0.384441	0.872076	58	0.0001	0.00261133	0.791734	60	0.0001	0.00219734	0.982247	52	0.475152	0.736627	0.930182	58	0.00169983	0.0268692	1.18431	58	0.0001	0.00166743	0.957941	60	0.357464	0.728074	0.816744	60	0.0001
8	ANG60900.1	722	42102.1	SVFPSLIGR;SFELPDGNIIVIGNER;GYSLTTTAER;QPGIMVGMEQR;DLTDYLMK;IWHHTFYNELR;KAAESSALEK;VAPEAHPVLLTEAPQNPK;ESLCFVAVDFEEEMKK;TTGCVLDSGDGVTHTVPIYEGYALPHAVVR	1;1;1;1;1;1;1;1;1;1	10	57	89483;89484;89485;89489;89491;120302;290965;290973;290975;290983;290987;290989;290993;290994;291022;125265;125274;125280;125284;125287;214843;214844;214845;214849;214852;171679;171683;171684;176837;176839;176844;176845;176847;176848;176855;181982;189470;189472;189477;189479;193494;193498;241687;241690;267881;267882;267883;340274;340275;340276;340277;357894;367727;367728;367729;369306;369307	EJK63020.1	actin [Skeletonema marinoi]	1.11652	53	0.0009999	0.0124263	1.30473	55	0.0001	0.00353298	1.28998	57	0.0001	0.00211861	1.57447	57	0.0001	0.00261133	1.1879	55	0.0001	0.00219734	1.12108	54	0.0019998	0.0168997	1.20216	55	0.0001	0.00367718	1.20054	57	0.0001	0.00166743	1.17011	57	0.00109989	0.0178261	1.08476	57	0.138386
9	ABO61504.1	155	43401	LSVNMVPFPR;GHYTEGAELVDAIMDVTR;FPGQLNCDLR;ASICDVPPTGMK;IMTTYSVVPSPK;NSGYFVEWIPNNLK;MSSVFIGNSTCIQEAWK	1;1;0;1;1;1;1	6	51	144708;144709;144711;144715;144716;149720;149723;149724;149726;149727;149753;149754;149755;162795;318785;318786;318787;318788;318790;318791;318792;344604;344606;344607;344608;345659;345660;345661;345666;345667;345668;163562;163563;163564;163567;163568;163569;163571;255447;255448;255454;255455;255456;255462;258570;258571;258582;264985;264990;264992;264995;267960;319742;319743;319752;319753;343425;…	ABO61502.1;ABO61503.1	beta tubulin, partial [Thalassiosira sp. CCMP1987]	0.707857	51	0.0001	0.00219734	0.918158	49	0.0115988	0.103471	0.765694	51	0.0001	0.00211861	0.959425	51	0.356864	0.70667	0.841997	51	0.0001	0.00219734	0.677707	50	0.0001	0.0016362	1.00731	50	0.756824	0.932048	0.821051	51	0.0001	0.00166743	1.04476	51	0.386761	0.752199	0.900772	49	0.0544946
10	XP_002287200.1	874	72043.2	DTQWINR;VASLAELNR;WFVSEGTR;EGPTALILSR;AALATAANEAR;VIQEIAK;VVSMPCVEAYER;KEGPTALILSR;FGFSAPGDIVMK;NYINDGGNFGAGFDK	1;0;0;1;1;1;1;1;0;0	6	47	77296;77299;77308;88613;88630;88631;88632;88639;88643;88644;88646;91147;112965;112967;112968;112969;112974;112975;112990;113451;113454;113459;113460;113468;113469;113471;127512;127532;127534;127535;127538;223694;223696;223697;223698;223703;223704;223708;223710;223727;227611;227613;227616;286370;286372;286373;286375;288875;235636;235637;235638;235639;235640;235641;235642;235643;254188;254191;25419…	EED94643.1	transketolase [Thalassiosira pseudonana CCMP1335]	1.44602	46	0.0001	0.00219734	0.982546	45	0.39936	0.718572	1.52235	47	0.00029997	0.00478094	1.06383	45	0.124688	0.410762	1.49595	46	0.0001	0.00219734	1.54909	47	0.0001	0.0016362	1.12127	45	0.0001	0.00367718	1.2235	47	0.0001	0.00166743	1.22396	45	0.0001	0.0035271	1.5409	45	0.0001
11	EED92040.1	1514	36931.3	AAIANLIPSSTGAAK;VISWYDNEWGYSNR	1;1	2	43	276807;276812;276813;276814;276815;276816;276817;276818;276819;276820;276821;276822;276823;276824;276825;276826;276827;276828;276829;276830;276831;276832;276833;293512;293513;293514;293515;293516;293522;293523;293524;293525;293526;293527;330750;330751;330752;330753;330754;330755;330756;330757;330759	XP_002290288.1	glyceraldehyde-3-phosphate dehydrogenase [Thalassiosira pseudonana CCMP1335]	0.93514	43	0.0254975	0.13241	1.1382	43	0.00019998	0.00621317	1.01471	40	0.732627	0.905344	1.33877	43	0.0001	0.00261133	0.912967	43	0.00149985	0.0159925	0.992828	40	0.89931	0.968714	1.05592	43	0.0327967	0.207367	1.09743	42	0.20278	0.478019	0.868329	42	0.00019998	0.00553483	0.758782	43	0.0001
12	EJK70567.1	372	26976.7	ADLLTANQGR;VTNLAPLEFPCK;AYTEDGMMRPIQTLIGTR;QLNAQVELLNGPNNFK	1;0;1;0	2	42	113438;113440;113442;113443;113450;113462;113463;113464;113465;113467;113470;113476;113477;113484;277559;277564;277567;277568;277569;277570;277571;277572;277575;326942;326944;326948;326949;326951;326952;326954;328521;328522;328524;328525;328526;328527;328528;328529;328531;328534;330036;330037;330038;330039;330041;330043;330049;348940;348942;349761;350502;331669	-	hypothetical protein THAOC_08056 [Thalassiosira oceanica]	1.26384	52	0.0001	0.00219734	0.881636	51	0.0001	0.00353298	1.38117	52	0.0001	0.00211861	0.969959	52	0.271773	0.634938	1.62186	52	0.0001	0.00219734	1.20645	51	0.0001	0.0016362	1.02696	49	0.20058	0.573099	0.725547	49	0.0001	0.00166743	1.11151	52	0.020398	0.139528	1.74588	50	0.0001
13	EED93540.1	981	42999.3	CVNVLN;HVHEVAK;GGGQFIAGK;EQGYAIPGVNIVGSNSINACMEAAAK;YGGPIMVTFSK;MNIDTDTQWAFWDGVR;LYGVPVVLHTDHCQK;FVFHGGSGSSVEDIQYAIGAGVIK	1;1;1;1;1;1;1;1	8	40	30683;30686;133352;133354;138133;199197;366142;239004;239023;239025;242631;242632;316258;316259;316260;316261;316262;316263;316264;316265;318154;318155;318156;318168;318169;328654;328655;328656;328657;362435;362436;362440;362441;362442;366650;366651;366652;366653;366654;366655	XP_002290003.1	predicted protein [Thalassiosira pseudonana CCMP1335]	1.53418	40	0.0001	0.00219734	0.975128	39	0.443256	0.750421	1.79045	38	0.0001	0.00211861	1.18513	40	0.0001	0.00261133	1.77453	40	0.0001	0.00219734	1.41877	38	0.0001	0.0016362	1.17702	39	0.0001	0.00367718	0.892046	35	0.00079992	0.00809357	0.850046	39	0.00349965	0.0395967	1.34741	39	0.0001
14	EED94121.1	563	28004.8	DSTLIMQLLR;VVTSIEQK;NLLSVAYK;ASASAALDAYQSATEVASSDLPPTHPIR;KASASAALDAYQSATEVASSDLPPTHPIR	1;1;1;1;1	5	40	154145;154154;154156;154160;154161;154162;154163;154165;154166;154167;159217;159229;159236;159241;159242;159243;159244;159246;159247;159268;159269;159976;159990;159992;159993;159998;161338;161339;161340;161341;161342;241859;241860;176856;176864;364053;364054;364055;364057;368228	XP_002288685.1	14-3-3-like protein [Thalassiosira pseudonana CCMP1335]	1.49665	40	0.0001	0.00219734	1.23671	40	0.0001	0.00353298	1.29709	40	0.0001	0.00211861	1.08818	40	0.0806919	0.315416	1.17839	40	0.00019998	0.00371509	1.25426	40	0.0001	0.0016362	1.11733	40	0.00109989	0.0206459	1.20177	40	0.0001	0.00166743	1.17221	36	0.00289971	0.0347772	1.31101	39	0.0001
15	EED94931.1	749	22428.2	GDATYLIVK;AGDHSLAQGLK;KAGDHSLAQGLK;FMCPCHGSQYAPTGAVVR;EDGTLQDYGLNAVCTHLGCVVPWSAANNK	1;1;1;1;1	5	39	184149;184150;184155;184156;184158;184159;184160;184161;184162;184163;184164;184170;184171;184172;184173;257215;214418;214424;214427;214432;214441;214442;214443;214451;300955;300956;300959;300960;300964;300965;300966;300967;325499;325500;325501;327063;327064;327067;369322	XP_002287488.1	predicted protein [Thalassiosira pseudonana CCMP1335]	0.713961	36	0.0001	0.00219734	0.678799	38	0.0001	0.00353298	0.9477	38	0.427557	0.732665	0.905902	39	0.0910909	0.337795	1.30519	39	0.0001	0.00219734	0.603406	29	0.0001	0.0016362	1.20626	39	0.0001	0.00367718	0.534117	33	0.0001	0.00166743	0.726074	39	0.0001	0.0035271	0.760649	39	0.0001
16	EJK60528.1	251	12896	KGMSIMNSFINDIFER;LMLPGELAK;QVHPDTGISK;VESYSTYIYK;RVESYSTYIYK;GMSIMNSFINDIFER	1;1;1;1;1;1	6	39	84888;339600;340732;340733;340738;340742;340749;341943;341946;341951;341957;181680;181691;181693;181694;181695;186501;186504;210795;210797;210798;210801;250813;305019;281218;291071;293672;293674;293675;293676;293677;293680;296380;296382;296383;296384;296386;296387;296388	EJK69581.1;EJK52561.1;ACI64888.1;XP_002295813.1;EED92608.1;EED88842.1;ACI64530.1;XP_002296171.1;XP_002290856.1;EED93631.1;XP_002288195.1;XP_002293833.1;EJK74337.1;EJK66208.1;EJK71317.1;EJK52043.1;EJK62506.1	hypothetical protein THAOC_19091 [Thalassiosira oceanica]	0.594464	39	0.0001	0.00219734	0.603866	37	0.0001	0.00353298	0.438694	38	0.0001	0.00211861	0.431812	39	0.0001	0.00261133	1.06735	39	0.109389	0.363688	0.520053	39	0.0001	0.0016362	0.9509	38	0.0879912	0.377953	0.474158	39	0.0001	0.00166743	1.05446	39	0.434357	0.781166	1.15908	39	0.0153985
17	XP_002291508.1	244	71465.7	DAGAISGLNVLR;EIAEAYLGK;ITITNDKGR;NTTVPAKK;TTPSYVAFTETER;AEEISSMVLTK;MVDYFLQDFK;NGLENYCYSLK;FEDLCMDYFK;NAVVTVPAYFNDSQR;IINEPTAAAIAYGLDQK;TQTFSTYADNQPGVLIQVFEGER;KTQTFSTYADNQPGVLIQVFEGER	0;1;0;0;0;1;0;0;0;0;1;0;0	3	38	152985;152986;152990;152993;188235;188236;188244;188246;188249;188250;188251;188252;188253;260024;260025;260032;194491;230434;238326;238327;296466;296475;240899;240901;240902;240903;240906;240907;240908;240922;240923;240924;240925;244477;244478;244480;244484;244494;244497;244500;244503;244504;261547;264632;264633;264634;264638;272032;272034;272039;272051;273392;273406;273407;273411;273412;318695;…	EED91615.1	heat shock protein 70 [Thalassiosira pseudonana CCMP1335]	0.945022	36	0.0874913	0.300876	0.964371	37	0.171283	0.537099	0.896877	35	0.00069993	0.0090041	0.893334	38	0.00019998	0.00462005	0.790301	36	0.0001	0.00219734	0.95294	38	0.356064	0.637272	0.900806	36	0.00209979	0.0310149	1.05615	38	0.39606	0.693876	1.03245	38	0.535946	0.843246	0.930736	38	0.219778
18	ABK20720.1	136	15985.6	SCAAGYIR;GWAMNVEWTDDPHPR;NNYWELWGLPLFDIK;LTQGCFSFLPDLTDAQIEK;RLTQGCFSFLPDLTDAQIEK;INAFDASYGVESCVMSFITNRPANEPGFYLDR	0;0;0;1;1;1	3	37	68375;68376;68377;68381;68385;68391;297239;340040;340044;354897;354899;354901;354902;354904;354906;354907;354910;354913;354914;354915;354916;354920;354922;354923;354924;354925;354926;354927;354929;360194;360195;360196;360197;369776;369830;369831;369833;369834;369835;369837;369838;369840;370250;370269;370270;370271	YP_874497.1	ribulose-1,5-bisphosphate carboxylase/oxygenase small subunit (chloroplast) [Thalassiosira pseudonana]	1.8986	37	0.0001	0.00219734	1.26603	37	0.0001	0.00353298	1.57528	37	0.0001	0.00211861	0.98012	34	0.648835	0.889537	1.1841	33	0.0001	0.00219734	1.39366	34	0.0001	0.0016362	0.840725	36	0.0001	0.00367718	0.922468	35	0.19598	0.4665	1.39114	37	0.0001	0.0035271	1.95172	37	0.0001
19	EJK66007.1	859	39860.5	VPTIDVSVVDLTCK;VIPSLQGK;VIYSAPAK;YDTIHGIAK;AASGNIIPSSTGAAK;LVAWYDNEWGYSGR;EVGWGALGADYVCESTGVFLTK;ETTYEEICAVIK;SSIFDAGAGIMLNPSFVK;AIHDEFDIQEALMTTVHAMTATQAVVDSSSR	0;0;0;0;0;0;0;1;1;0	2	36	135909;303485;303486;303488;303490;303491;303492;303493;303494;303495;303498;303499;303500;303501;303502;303503;303504;303505;303506;303507;303509;140371;140372;140374;140375;140376;140377;140380;140393;142576;194430;194431;194433;194435;194436;194438;194440;194441;194442;194446;194447;194449;194450;194456;194457;194462;264796;264797;264798;269199;269214;269215;269218;269219;269220;269222;269224;…	-	hypothetical protein THAOC_13085 [Thalassiosira oceanica]	1.32879	36	0.0001	0.00219734	1.35391	36	0.0001	0.00353298	1.47895	36	0.0001	0.00211861	1.49571	35	0.0001	0.00261133	1.57929	36	0.0001	0.00219734	1.51066	33	0.0001	0.0016362	0.939367	34	0.0191981	0.147213	0.779925	35	0.0001	0.00166743	0.811758	36	0.00159984	0.0241858	1.28489	30	0.0001
20	ABF60377.1	20	54591.3	VALESMVLAR;AGNSTYAR;GFYDILR;DTDVLALFR;VVYEGLK;ASAATGEVK;IPHSYLK;AVAALRLEDMR;FLNCMEGINR;TFQGPATGIIVER;YESGVIPYAK;MGYWDAAYSVK;TCGPLQTALDLWK;MSGVDHIHAGTVVGK;NEGIDYFNNQVGPQILR;GSYLNITASTMEEVYK;GSYLNITASTMEEVYKR;GGLDFLKDDENINSQPFMR;GGLDFLKDDENINSQPFMRWR	0;0;0;0;0;0;0;0;0;0;0;0;0;0;1;0;0;0;0	1	33	19153;122453;122459;122465;122474;122475;122476;122479;122482;122490;122492;122495;122496;122498;122502;122503;122507;122508;122509;122510;122511;122512;122513;122514;122515;122516;122517;122518;122519;122520;122521;122522;122524;122528;122532;127291;127315;127318;127325;127326;127328;127329;127331;127332;127335;127337;127339;127342;127348;127349;127350;127351;127353;127354;127357;127358;127360;1…	-	ribulose-1,5-bisphosphate carboxylase/oxygenase large subunit, partial (chloroplast) [Skeletonema pseudocostatum]	1.47181	111	0.0001	0.00219734	1.19362	109	0.0001	0.00353298	1.63375	112	0.0001	0.00211861	1.26348	110	0.0001	0.00261133	1.30444	114	0.0001	0.00219734	1.29059	111	0.0001	0.0016362	0.88322	114	0.0001	0.00367718	0.850072	112	0.0001	0.00166743	1.19275	114	0.0001	0.0035271	1.74295	113	0.0001
21	EED88796.1	1633	49384.2	GYPSIGDAK;AWIDQFENAPIGGGLAK;YAESAGVPVYK;YEVPHHPLHAK;VMVVDTFHLFPETMEFLR;CNPIAYWTLEDTFDYIAK	1;1;1;1;1;1	6	33	161137;161139;161146;161162;161165;241814;186911;330583;330595;330597;330599;330600;330603;235258;235276;265854;265855;265856;265857;314191;314192;314193;339943;339951;341126;341127;341128;341129;341130;342294;342295;342296;356352	XP_002293787.1	phosphoadenosine-phosphosulphate reductase [Thalassiosira pseudonana CCMP1335]	1.19699	32	0.0001	0.00219734	0.88813	30	0.00349965	0.0460319	1.66759	29	0.0001	0.00211861	1.22649	30	0.0001	0.00261133	1.56594	32	0.0001	0.00219734	1.35937	32	0.0001	0.0016362	1.24182	29	0.0001	0.00367718	1.15082	30	0.0307969	0.13729	0.782219	31	0.00059994	0.011361	0.926237	31	0.347265
22	EED92819.1	1287	44150.2	VVVVGMPK;MLIIHEVMGR;DAFGHVSLAK;EGETPLEVAAQQLIK	1;1;1;1	4	32	136143;136144;136145;141244;157078;157079;157084;157085;157086;157089;157090;157091;157092;162116;162117;162126;162129;162132;162134;162135;167009;167021;201391;313431;313436;313437;313438;313439;313440;313441;313443;313444	XP_002289282.1	phosphofructokinase [Thalassiosira pseudonana CCMP1335]	0.99846	30	0.974503	0.989326	1.04265	31	0.421058	0.730786	1.2947	31	0.0001	0.00211861	1.28674	30	0.0001	0.00261133	1.543	32	0.0001	0.00219734	1.5197	32	0.0001	0.0016362	1.15519	32	0.00039996	0.0093601	1.13515	31	0.0237976	0.114292	0.589466	32	0.0001	0.0035271	0.747563	32	0.0001
23	EED95736.1	137	36432	VYVVTSI;VWALTNCK;DVLSVAFSVDNR;LWNTLGECK;YWLCAATDECIK;DGTAMLWDLNEGKR;FSPSQSVPLIVSCGWDR;APHCTSLAWSADGSTLFAGYSDK	1;1;1;1;1;1;1;1	8	32	42662;42664;42667;42668;42669;187638;194344;194352;194353;194356;220266;220267;301007;301011;301012;301013;334686;334687;310921;310922;310933;313950;313951;313953;313954;313955;313956;313957;313958;313962;362496;362497	XP_002286095.1	guanine nucleotide binding protein beta subunit-like protein [Thalassiosira pseudonana CCMP1335]	1.33112	32	0.0001	0.00219734	1.03501	32	0.333267	0.685302	1.37262	32	0.0001	0.00211861	1.07432	32	0.247075	0.604111	1.22738	29	0.0001	0.00219734	1.53792	31	0.0001	0.0016362	1.232	29	0.0001	0.00367718	1.55953	32	0.0001	0.00166743	0.74741	31	0.0001	0.0035271	0.69749	32	0.0001
24	AIR75860.1	2	52050.2	AAAAGFEK;ANEPVLSMRPID;SPSGEIIFGGETMR;DIESTGFAWWSGNAR;IKNDIQPWQER;LGANVSSAQGPTGLGK;AMYLGGIYDTWAPGGGDVR	1;1;1;1;1;1;1	7	31	116543;116545;203682;233583;233584;233587;233588;233589;233595;233596;233597;237232;237233;237239;278195;278196;284336;284341;284355;284356;284357;289091;289092;289095;289097;289098;289099;289100;289104;289106;323013	YP_004072563.1;AIR76133.1;YP_009093460.1;AIR75444.1;YP_009093187.1;AIR75585.1;ADB27517.1	photosystem II CP43 chlorophyll apoprotein (chloroplast) [Roundia cardiophora]	0.455756	30	0.0001	0.00219734	0.717811	31	0.0001	0.00353298	0.351512	30	0.0001	0.00211861	0.559636	31	0.0001	0.00261133	0.840028	31	0.00139986	0.0154758	0.80982	31	0.00029997	0.0038845	0.755073	31	0.0001	0.00367718	0.717693	31	0.0001	0.00166743	1.27589	31	0.0001	0.0035271	1.43616	31	0.0001
25	EED92067.1	268	22681.4	LQIWDTAGQER;QWLHEIDR;YACENVNK;LLLIGDSGVGK;TSTNVEQAFLTMASQIK;FADDTYTESYISTIGVDFK;GAHGIIVVYDVTDNESFNNVK;VVSTEQGKEFADGLGIEFLETSAK	0;1;1;1;1;1;1;1	7	31	41866;192953;192955;192956;192958;192959;192961;192963;192964;192965;192966;192970;192971;192972;124680;124709;124710;124712;124713;189117;260743;260746;260753;208302;208303;208314;208315;208318;337345;337358;338430;338431;338432;338433;354421;354422;354424;354426;354427;358779;358780;358781;367571;367573;367575	XP_002290315.1	ypt1-like rab-type small G protein [Thalassiosira pseudonana CCMP1335]	1.14359	31	0.00729927	0.0515815	0.972256	31	0.456554	0.757561	1.42399	30	0.0001	0.00211861	1.17525	31	0.00079992	0.0127562	1.31544	31	0.0001	0.00219734	1.56255	30	0.0001	0.0016362	1.48673	31	0.0001	0.00367718	1.82057	30	0.0001	0.00166743	0.806605	31	0.00039996	0.00827044	0.673504	30	0.0001
26	ABO61433.1	107	42254	DVNAAVATIK;FDGALNVDVTEFQTNLVPYPR;QLYHPEQIISGK;NLDIERPTYTNLNR;AVCMVANTTAIAEALSR;TIQFVDWCPTGFK;CGINYQPPTVVPGGDLAR;IDHKFDLMYAK;TVGGGDDAFNTFFSETGAGK	1;1;1;1;1;1;1;1;1	9	30	190410;190412;190414;237049;350769;350772;281968;282236;282239;282240;282243;282245;282246;282247;323952;291729;291734;291735;294379;294396;294397;294399;310030;310031;310039;310040;311360;322099;344698;344702	ABO61434.1;ABO61430.1;EED90212.1;XP_002292237.1	alpha tubulin, partial [Thalassiosira sp. CCMP1987]	0.715518	28	0.0001	0.00219734	1.09689	28	0.0193981	0.142675	0.612714	29	0.0001	0.00211861	0.992665	29	0.893011	0.970516	0.704635	30	0.0001	0.00219734	0.596633	29	0.0001	0.0016362	1.00954	30	0.826917	0.960313	0.897275	30	0.0629937	0.229195	1.24167	30	0.0019998	0.0270499	0.919519	25	0.159784
27	XP_002293912.1	1005	40788.5	VNPEVLLK;QSFELSSMGIR;WALHYYGVEAGK;MLLDGTLPQTIGGGIGQSR;CAHIGEVQHGWYNPK	1;1;1;1;1	5	30	162577;162578;162582;162584;162585;162586;174753;174757;179979;179986;278489;278495;278498;278499;321725;311410;311411;311412;311413;311414;311418;313390;313391;313397;313398;313400;313401;331384;351197;351202	EED88921.1	aspartate-ammonia ligase [Thalassiosira pseudonana CCMP1335]	0.890577	30	0.247575	0.557431	1.06744	30	0.278472	0.653803	0.907866	30	0.443356	0.742252	1.10611	30	0.125187	0.411657	0.951022	30	0.19798	0.509658	1.16467	30	0.00439956	0.0305761	1.11003	30	0.0089991	0.090091	1.3411	29	0.0001	0.00166743	1.082	27	0.172783	0.508196	0.929006	29	0.39586
28	XP_002295809.1	392	72371.8	AVVTVPAYFNDSQR;FSPSQIGSMVLGK;DIQGLVPYNIVK;QAVTNPENTFYAVK;GVNPDEVVAMGAAIQGGVLK;QQTFSTAVDNQPQVQIK;KQQTFSTAVDNQPQVQIK	1;1;1;1;1;1;1	7	30	252872;252873;252874;252875;270322;270323;270326;273333;273334;273335;273336;271803;271804;271805;271806;307992;307993;341316;341317;341318;341319;342422;342424;342425;341806;341809;341810;341812;360917;360918	ACI64526.1	chaperone, heat shock protein 70 [Thalassiosira pseudonana CCMP1335]	0.975931	30	0.730027	0.903383	0.9245	29	0.0116988	0.103849	0.825003	29	0.00179982	0.018956	0.774	30	0.0001	0.00261133	0.676384	30	0.0001	0.00219734	0.888494	28	0.00359964	0.026664	0.812533	29	0.0001	0.00367718	1.03449	30	0.575542	0.822008	1.44609	30	0.0001	0.0035271	1.25151	30	0.0001
29	EED91332.1	1010	32211.5	TGLFLDPK;VPFLFTVK;SELNQLSYLQVK;QTYTLEGIEGSLK	1;1;1;1	4	29	155820;155831;155834;155835;175036;175038;175039;175041;175042;175043;283514;283519;283543;283544;283547;283548;286271;286272;286273;286274;286277;286278;286282;286283;286286;286289;286294;326480;326481	XP_002291225.1	oxygen-evolving enhancer protein 1 precursor [Thalassiosira pseudonana CCMP1335]	2.93859	26	0.0001	0.00219734	3.32675	29	0.0001	0.00353298	4.32918	26	0.0001	0.00211861	5.39123	29	0.0001	0.00261133	2.79265	28	0.0001	0.00219734	7.33494	29	0.0001	0.0016362	1.35161	29	0.0001	0.00367718	3.68768	29	0.0001	0.00166743	0.609553	27	0.0001	0.0035271	1.217	25	0.0001
30	XP_002286746.1	1518	45770.7	YYMGGK;AHYELFTR;EAIQHMMIR;NFGCTHFIIGR;GGEDIPEWFAFK;QTPHGGTLVDLILK;WEYLPYSMHMAGPR	1;1;1;1;1;1;1	7	29	103068;107105;107184;199342;134840;134841;134850;139945;139958;139959;139960;139965;139966;139971;194307;194312;194317;194347;278890;278899;278900;278901;278908;278909;294847;294848;294849;294851;327448	EED96387.1	hypothetical protein THAPSDRAFT_1326 [Thalassiosira pseudonana CCMP1335]	1.35146	29	0.0001	0.00219734	1.13029	29	0.0316968	0.201829	1.66501	29	0.0001	0.00211861	1.30199	27	0.0001	0.00261133	1.39068	29	0.0001	0.00219734	1.59816	28	0.0001	0.0016362	1.51383	29	0.0001	0.00367718	1.78373	28	0.0001	0.00166743	0.782647	28	0.0001	0.0035271	0.691073	28	0.0001
31	YP_009093452.1	643	69952.5	GVIVVGATNR;QVTVNLPDR;ALQIILDNR;VDILDAALLRPGR;GILLVGPPGTGK;AEFEEIVSFLK;VEIPVGASQLIQK;NAIVQASSPELGNRPQTIR;NKPLGEDVSLVQLANR;EQTLNQLLTEMDGFK;AEFEEIVSFLKEPEK;LKEYNIDFDAHPAEQK;EQTLNQLLTEMDGFKENK;AAEQVIFGDPEVTTGASSDLQQVTNLAR;LIAYHEVGHAITGTVLQSHDEVEK	0;0;1;0;0;0;0;0;1;0;0;0;0;1;1	4	28	92442;92444;92445;92446;108646;108647;108652;108653;108675;112693;112695;112696;112697;112698;112699;112705;112706;112707;112708;112709;112725;216402;216403;216404;216405;216406;216407;216408;216409;216410;216411;216412;217519;217520;217523;217524;217525;217526;217527;262732;262733;262734;262736;262740;276160;276161;276162;276163;276164;276165;276166;276167;276170;326787;326788;326789;326792;3267…	AIR76125.1;XP_002297509.1;ABK20758.1;YP_874535.1;EED86149.1	putative plastid division protein (chloroplast) [Thalassiosira weissflogii]	0.987345	25	0.763824	0.918219	1.00205	28	0.961404	0.984906	0.817718	26	0.00559944	0.0444255	0.853152	28	0.0148985	0.106536	0.768727	28	0.0001	0.00219734	0.717282	28	0.0001	0.0016362	0.928123	27	0.0239976	0.168921	0.871016	27	0.0001	0.00166743	1.08422	28	0.0942906	0.364782	0.90776	25	0.00679932
32	EJK63051.1	284	71182	DYFVGFLK;AVLLPTVSDVPR;YSFVYVYEDGEWK;NLFQLWNSALATEDPDAVAK	0;1;1;1	3	27	38801;186765;186785;186795;186796;186801;186815;186817;186820;258948;258949;178816;178825;178826;178827;178830;178832;178833;178834;178835;178836;178838;178840;178841;178842;178843;178844;320174;320175;320179;320183;320185;320186;320187;320189;320199;345423;355747	-	hypothetical protein THAOC_16311 [Thalassiosira oceanica]	2.89991	33	0.0001	0.00219734	1.45955	36	0.0001	0.00353298	2.81789	36	0.0001	0.00211861	1.53053	37	0.0001	0.00261133	1.76623	38	0.0001	0.00219734	1.14669	37	0.0177982	0.089991	1.10281	37	0.00169983	0.0268692	0.734291	37	0.00019998	0.00262893	3.79052	38	0.0001	0.0035271	5.86881	38	0.0001
33	EED88205.1	1069	126521	GSSFAETVAR;GLLLMDTTWR;FLHECPWER;DFAPDTGTISLYR;GEIGIPPGGFPEPLR;VFDSLNYLDNLK;LADELVGMGVHSLAIK;MDGVGYSGLAITPYFDSMIVK	0;0;0;1;1;0;1;1	4	26	103554;103557;159191;159192;164319;164320;164322;180803;180804;180808;227648;227656;227657;227658;288909;246270;246279;246283;246284;246285;246287;246288;246289;246291;246295;246297;246298;246300;286563;286564;286575;316575;316576;316579;316580;316581;318468;357848;358439	XP_002294371.1	pyruvate carboxylase-like protein [Thalassiosira pseudonana CCMP1335]	1.13945	24	0.00469953	0.0388466	1.01565	26	0.655934	0.880249	1.1411	26	0.0613939	0.23933	0.972018	26	0.577742	0.862843	0.948996	26	0.211379	0.524662	0.915802	26	0.209679	0.474149	0.964076	25	0.20228	0.575738	0.942291	26	0.432757	0.725846	1.05843	26	0.305469	0.679283	1.06255	25	0.261474
34	EJK48594.1	547	198051	ISAYVYR;AIQCFVQR;MLQPWLEAR;EQSIALLK;LATHELLEFR;QVCFACLK;LAATCGLEVIK;MIQMFNLDTK;LALCHIHLEEYR;IILQGSDFSDNK;LFDLGANEDFTK;LFVMEVGRDPSK;GPSNMQVCVEVAK;YIQSACMLGQFK;VQETTAFLLEALK;AFLTNNMFYEPK;IYIQMNKDPK;AAEHYSDINDIK;AAEHYSDINDIKR;NSHQMNPEFVVTYFGK;VLGPFCESLDPSLAFVAYK;GLVSAEGGPLIDIQATAEAFLSSNR;LLEINLIGGAPQVADAIMQNGILTHYDR	0;0;0;1;0;0;1;0;0;0;1;0;1;0;0;0;0;1;1;0;0;0;1	7	26	62136;62140;102710;102712;102713;102714;139703;139711;139716;139717;144616;144617;159382;159404;166511;196397;196413;233245;233246;248209;248210;248211;251622;251626;251627;251630;250103;250104;250119;250120;304584;267594;267627;267629;267633;267641;267645;273902;273903;273904;273907;275442;275443;278540;282933;282934;282940;285541;285543;285546;285547;285549;285555;287429;287432;287433;289791;28…	-	hypothetical protein THAOC_32593 [Thalassiosira oceanica]	0.704422	26	0.0001	0.00219734	0.734629	26	0.0001	0.00353298	0.811388	26	0.00019998	0.00360164	0.83817	26	0.0001	0.00261133	0.814026	24	0.0001	0.00219734	0.781233	26	0.0001	0.0016362	1.03032	26	0.30287	0.688236	1.06035	24	0.0128987	0.0714787	0.862785	26	0.0280972	0.171928	0.65443	26	0.0001
35	EED89581.1	426	140403	AVAYLIPFMEK;IMSQALADR;GVVGLFPANR;FVVGAIGPTNR;LPDVGRPK;EICPYVK;MFLPQVIK;WLSPILNYER;VPFMLDASK;FVEAFAEYLHR;WLSPILNYERD;QPLLIGGATTSK;TLSGQTGEAFYASIR;KLPDVGRPK	0;1;1;0;0;1;0;1;1;1;1;1;0;1	9	25	20929;256685;97710;105289;105294;105305;105306;105307;105310;105311;135488;135495;135496;135498;153062;161534;182866;186083;191886;191887;191937;195983;195991;209579;209580;276104;276105;215521;215522;235821;235823;259651;259655;259656;263215;263216	XP_002293120.1	5-methyltretrahydrofolate-homocysteine s-methyltransferase [Thalassiosira pseudonana CCMP1335]	0.80729	23	0.00029997	0.00505183	0.899269	25	0.0234976	0.160389	0.944009	25	0.545445	0.819989	1.00257	25	0.972103	0.991919	0.892659	25	0.010399	0.0701832	0.840406	25	0.00409959	0.029167	1.13602	23	0.00019998	0.00621317	1.05559	24	0.267673	0.564496	0.78881	25	0.00019998	0.00553483	0.615651	25	0.0001
36	EED91201.1	1681	139061	AVLFEVQSR;VGVQTFR;EYITAIR;ATGGSSGVDVPIASLR;SAMGTAFK;LLQPPTPIVR;TLDNPIYATR;VLGELTAPK;GFPEVALHFVR;AIVAYLQSK;YCLPTGDTGTIR;QGNHQVVEMSYQR;GVNWAAFHPTLPLLASAADDR;TVQFHPNATQFPWILSASDDQTLR	1;1;1;1;1;1;1;1;1;1;1;1;1;1	14	25	14615;110595;47663;60818;66628;234998;234999;131159;136532;145882;145885;145907;167499;180367;180368;180392;180428;188055;202566;202567;202569;254720;340747;362990;362994	XP_002291094.1	coatomer protein subunit alpha [Thalassiosira pseudonana CCMP1335]	0.719455	25	0.0001	0.00219734	0.895515	25	0.00169983	0.0288971	0.730784	25	0.00029997	0.00478094	0.904155	25	0.0565943	0.259499	0.90843	24	0.040196	0.191592	0.807994	25	0.00039996	0.00486438	0.997738	25	0.961804	0.98946	0.92514	25	0.175382	0.440061	1.00173	25	0.975102	0.994138	0.885161	25	0.0793921
37	EED93364.1	1484	76705.2	DYQFMLR;IMPSYIER;AASVETWAK;LAMACPALPLCGLAQTEAER;AADHMGFVPK;LKQPAGELPPDLYR	1;1;1;1;1;1	6	25	88500;103588;103594;192123;178694;178695;203624;338324;338326;338327;208447;208449;208451;208453;208455;212402;212403;309810;309811;309812;309813;309814;309815;309816;309817	XP_002289827.1	predicted protein [Thalassiosira pseudonana CCMP1335]	1.41038	23	0.0001	0.00219734	1.27921	25	0.00029997	0.00858009	1.42518	24	0.0001	0.00211861	1.34358	25	0.0001	0.00261133	0.936107	25	0.147285	0.428769	1.50914	24	0.0001	0.0016362	1.18473	21	0.0001	0.00367718	1.82535	25	0.0001	0.00166743	0.972342	22	0.50405	0.828823	0.724896	22	0.0001
38	EED93670.1	350	19571.9	EMIDFVSYYR;SHMVTATGLAK;KEMIDFVSYYR	1;1;1	3	25	194575;194576;194577;194584;194585;198694;198697;198698;198701;264898;264901;264903;264906;264907;267924;219172;219173;219176;219177;219178;219179;288193;288194;288200;290686	XP_002288234.1	predicted protein [Thalassiosira pseudonana CCMP1335]	0.881952	25	0.00419958	0.0358656	0.817609	23	0.00019998	0.00621317	1.01226	25	0.846815	0.939443	0.858943	25	0.00369963	0.0389867	1.17092	24	0.00109989	0.0130395	1.41009	24	0.0001	0.0016362	0.854097	21	0.0001	0.00367718	0.960239	25	0.478452	0.760276	0.71257	24	0.00029997	0.00719528	0.969888	24	0.726127
39	XP_002285992.1	528	44617.2	YAGFTGVR;LSAFAPR;SIFEIEGAR;LVGGYLFPEIGR;GSILVFDAAYAPFIR;AQVVTIPGAGFGPGGEGYLR;ADIVYFCSPNNPTGAAATK	1;1;1;1;1;1;1	7	24	4173;61844;38993;38994;102738;102747;102774;102775;102776;194176;194179;194180;194181;194182;267439;315293;315294;315297;315300;315304;342748;342751;345936;345937	EED95633.1	aspartate aminotransferase [Thalassiosira pseudonana CCMP1335]	1.39098	23	0.0001	0.00219734	1.2138	23	0.00039996	0.0105989	1.48918	24	0.0001	0.00211861	1.44869	23	0.0001	0.00261133	1.27928	24	0.0001	0.00219734	1.8524	23	0.0001	0.0016362	1.14069	24	0.00029997	0.00772209	1.74034	22	0.0001	0.00166743	1.00635	23	0.867713	0.971876	1.12189	20	0.0001
40	YP_009093407.1	152	83908.3	LNFAPTIQPR;NVQVFVEK;ALGRPQDMFSDK;DLMAQLYPSFGK;DYTPANNYNNLLDR;LLDAGVSPQEIPLPHEFIINR	1;1;1;1;1;1	6	24	143788;143789;178805;178807;178814;272937;272939;272940;275911;275913;273923;273924;273937;273938;273939;276939;276945;276958;275510;275512;349017;349019;349020;349023	AIR76080.1	photosystem I P700 apoprotein A1 (chloroplast) [Thalassiosira weissflogii]	0.532701	24	0.0001	0.00219734	0.705303	24	0.0001	0.00353298	0.392341	24	0.0001	0.00211861	0.523103	24	0.0001	0.00261133	0.609243	24	0.0001	0.00219734	0.657122	23	0.0001	0.0016362	0.766892	21	0.0001	0.00367718	0.804281	22	0.0001	0.00166743	1.76058	24	0.0001	0.0035271	1.45758	23	0.0001
41	EJK64680.1	1063	31005.5	EIPSVTGTK;DLQMVNIK;VLPSIGNEVLK;SVVAQYNAEELLSK	1;1;1;1	4	23	168779;168784;168787;168788;168793;177981;177985;183101;231828;231834;231835;231836;231837;231838;304163;304179;304182;304183;304186;304187;304188;304189;304190	XP_002289569.1;EED93106.1	hypothetical protein THAOC_14563 [Thalassiosira oceanica]	0.811487	23	0.00209979	0.0226576	0.736416	23	0.0001	0.00353298	0.740439	23	0.0001	0.00211861	0.675188	23	0.0001	0.00261133	0.741968	23	0.0001	0.00219734	0.65689	22	0.0001	0.0016362	0.875399	22	0.0001	0.00367718	0.808434	21	0.0001	0.00166743	1.20814	23	0.00029997	0.00719528	0.928817	20	0.0629937
42	XP_002289902.1	800	68956	AWSPPPLR;ASQGTLFK;NMPGVIMAMGR;VYDNEQLMLR;FNTVGVSDGISMGTTGMR;FVMEDVQNIGGTPGMIK;ISDVTPFLADLKPSGK	1;1;1;1;1;1;1	7	23	6648;75146;75147;143618;149978;149981;149982;149995;160052;160054;165102;182937;182952;182953;256411;300311;302820;334871;334875;336065;336069;336070;345632	EED93439.1	probable dihydroxyacid dehydratase [Thalassiosira pseudonana CCMP1335]	1.16915	23	0.0433957	0.195987	1.0356	23	0.322468	0.681155	1.30099	22	0.00689931	0.0513457	1.23855	22	0.0001	0.00261133	1.38955	23	0.0001	0.00219734	1.61918	23	0.0001	0.0016362	1.15695	23	0.00319968	0.0420863	1.35695	23	0.0001	0.00166743	0.810275	23	0.00119988	0.0189349	0.956937	23	0.363664
43	CAA10621.1	119	15532.9	NPNPASIK;NGENLLYLAR;EQCLALSTQLR;YAITWTSAK;EQIFEMPTGGSAIMR;KEQCLALSTQLR;IFPSGEVQYLHPK	0;0;0;1;1;0;0	2	22	140070;140073;145597;193499;200423;200427;200430;272504;272505;272506;272507;275516;275517;275518;275519;275520;275521;275522;275526;275527;275528;275571;278639;278647;278649;278650;287645;287646;298664;298670;298672;298673;298676;333402	sp|O96800.1|PSAD_SKECO	PSI ferredoxin-binding protein II (chromoplast) [Skeletonema costatum]	1.77049	20	0.0001	0.00219734	1.31771	19	0.0001	0.00353298	1.44647	21	0.0001	0.00211861	1.12387	22	0.029597	0.168246	1.13854	22	0.00769923	0.0566286	1.95553	20	0.0001	0.0016362	0.840209	22	0.0001	0.00367718	1.44678	21	0.0001	0.00166743	1.34264	22	0.00019998	0.00553483	1.82864	22	0.0001
44	EED94913.1	147	246651	AISFVVMATPEDLR;TAQAINDFR;LYIAANSGAR;SQVAYQTSK;LGGIPMGVIATENR;LQVEHPVTEMITR;GSFTETLAGWAK;TEDLPLIIFANWR;GDISTTVDYISK;QVVLIANDITHK	1;1;1;1;1;1;1;1;1;1	10	22	77078;249072;249074;252433;106876;106908;192826;192828;192829;221012;221025;221027;224867;249892;249893;253955;253956;253962;257123;260159;260160;270350	XP_002287470.1	predicted protein, partial [Thalassiosira pseudonana CCMP1335]	0.856188	21	0.00569943	0.0440789	1.01151	21	0.763924	0.913546	0.821742	21	0.0219978	0.120055	0.934894	19	0.221978	0.581401	1.0531	22	0.227777	0.55069	0.959264	21	0.286571	0.568093	0.986818	22	0.740526	0.921815	0.872735	22	0.00979902	0.0576733	1.02002	22	0.725127	0.931304	1.12663	20	0.00329967
45	XP_002296387.1	56	49664	DIQEIFR;ILESLDMR;RDIQEIFR;ILVSTDLFGR;ELAFQIAHEYER;LTLHGLQLYYVK;GLAISFISSEPDQEILDK;VNVVINYDFPDDSDQFLHR	1;1;1;1;1;1;1;1	8	22	74331;94316;94321;118882;132455;132458;132459;132462;132465;239349;239351;239358;239361;239367;239376;297150;287835;343765;343766;345400;358831;358836	EED87083.1	dead box family RNA helicase [Thalassiosira pseudonana CCMP1335]	1.3829	21	0.0001	0.00219734	1.29525	20	0.0001	0.00353298	1.22926	22	0.00489951	0.0402923	1.16536	22	0.00159984	0.0201602	0.958439	22	0.411559	0.749878	1.358	22	0.00029997	0.0038845	1.02898	22	0.579542	0.854906	1.46586	22	0.00019998	0.00262893	0.936214	22	0.278772	0.64614	0.796763	16	0.0001
46	ACI64945.1	331	46682.2	FSLGPCAER;SSIPTIEYLK;IIIGGGMVFTFLK;FLQPSVSGFLLAK;AGDMSHISTGGGASLELLEGK	1;1;1;1;1	5	21	107063;107065;107068;227555;227573;227574;227576;227577;227578;227579;227581;227582;227583;227585;288849;278984;281822;280939;280940;347778;347791	XP_002296228.1	predicted protein [Thalassiosira pseudonana CCMP1335]	1.54349	21	0.0001	0.00219734	1.56967	21	0.0001	0.00353298	1.80334	21	0.0001	0.00211861	1.86002	21	0.0001	0.00261133	1.30389	21	0.00029997	0.00514806	1.4177	19	0.00029997	0.0038845	1.03097	21	0.379862	0.754698	1.06635	19	0.358064	0.662088	1.12469	20	0.0089991	0.076365	1.45259	19	0.0001
47	AIR75875.1	510	32375.1	FYESNPGLSSR;EIAALLLIDK;DELVVILAGYK;MADILFQLGYVK;DDLVGQYIGHTAPK;LLNLLDEELVGLAPVK;DELVVILAGYKEPMDR	0;0;1;0;0;0;1	2	20	175309;175311;175312;175313;175316;214938;214939;214940;214941;214942;243574;243583;243584;282107;282108;282111;282112;282114;298422;298426;298430;298431;298432;298433;298435;325776;335771;335772;335773;335774;335775;335776;335777;336966;336968;336969;336970;336971;336972;336973;336974;336975;336976	YP_009093202.1	rubisco expression protein (chloroplast) [Roundia cardiophora]	0.785416	18	0.0001	0.00219734	0.958405	20	0.439856	0.74705	0.749031	20	0.0001	0.00211861	0.873083	20	0.0104989	0.0811979	0.98152	20	0.720428	0.917579	0.639821	20	0.0001	0.0016362	0.823841	20	0.00039996	0.0093601	0.518959	20	0.0001	0.00166743	1.36894	20	0.00069993	0.012225	1.68018	20	0.0001
48	EED87898.1	1620	52559.7	VIPGYGHAVLR;ALGLPLERPK;AVGGLCQLYWDR;NVYFDGVVTK	1;1;1;1	4	20	151748;151753;151756;213829;213830;213832;213833;213835;213836;223293;223294;223295;286041;225335;225336;225347;225350;225351;225352;287536	XP_002294538.1	precursor of synthase [Thalassiosira pseudonana CCMP1335]	1.17582	20	0.00419958	0.0358656	0.961974	20	0.380262	0.705205	1.18426	19	0.0019998	0.0208187	0.980856	19	0.729027	0.907127	1.3611	20	0.00019998	0.00371509	1.2639	19	0.0001	0.0016362	1.30413	20	0.0001	0.00367718	1.18166	20	0.00259974	0.0220855	0.879274	19	0.00229977	0.0293425	0.915754	19	0.0118988
49	EED89326.1	438	168118	YIGATLDR;GQLTPEQVSQYYLDIK;VFPHDYK;IQGTDFEALYR;NAQPTGEVSVK;LVSEVGVGVVAAGVAK;GAQVFEAVGLADEIVYR;DDHVVLSSEIGVIPELK;GGVGCCPASGDGAGMLFGMPDAFMR	1;1;1;1;1;1;1;1;1	9	20	71291;71307;79929;338244;160548;160555;160561;160583;192067;222457;222458;222459;222462;288850;288851;301476;334949;335958;356086;356087	XP_002293590.1	predicted protein [Thalassiosira pseudonana CCMP1335]	1.19978	20	0.00509949	0.0412075	1.17254	16	0.00079992	0.0161961	1.02334	20	0.663334	0.879856	0.999769	20	0.9975	0.9995	0.983631	19	0.778822	0.923181	1.10437	19	0.0268973	0.120137	1.08878	20	0.140286	0.479352	1.12914	19	0.0363964	0.153154	0.962052	20	0.440356	0.78215	0.882431	20	0.0787921
50	EJK46845.1	1242	68651	TPNEYIR;MSALSGGQK;SYFSFTESK;FPQPGPIEGVK;EMLATVGFVPDGK;AKPDHAVSTLSGGWR;FKFPQPGPIEGVK;ADILLLDEPTNHLDVINVAWVK	0;0;1;0;1;0;1;1	4	20	67248;151976;151977;151990;151991;157060;214120;214123;279654;231769;231772;231774;231775;231776;231785;272745;272748;272749;272751;272758;272759;272760;275771;275784;275785;275796;275797;275798;308002;308005;308006;308007;326921;363450;363451;363452	-	hypothetical protein THAOC_34470 [Thalassiosira oceanica]	0.568012	18	0.0001	0.00219734	0.922189	20	0.0362964	0.218749	0.623433	20	0.0001	0.00211861	0.940532	20	0.290871	0.656829	0.71082	20	0.0001	0.00219734	0.595901	20	0.0001	0.0016362	0.808565	17	0.0001	0.00367718	0.722058	15	0.0001	0.00166743	0.667435	20	0.00019998	0.00553483	0.524746	20	0.0001
51	XP_002287527.1	497	50090.7	SPLMGLFEK;DFNVDLIPK;LCAIHGGTFMLNR;ECVISGLLSVQGMR;FVVGDPSYFPK;YGTSPYIYPVYGLGGLPEGFSR;NDYYGADCASLNLTNLYK	1;1;1;1;1;1;1	7	20	195488;195489;199694;205415;205416;205421;205423;239357;249054;249055;249056;252428;252429;252430;251465;251466;251467;350669;350670;350979	EED94970.1	probable RabGDI [Thalassiosira pseudonana CCMP1335]	1.22997	19	0.00059994	0.00858009	1.14133	20	0.00569943	0.0622447	1.4551	18	0.0001	0.00211861	1.31983	20	0.00039996	0.00750758	1.0916	19	0.0175982	0.102961	1.26237	19	0.00429957	0.0303499	1.20063	20	0.00039996	0.0093601	1.4118	20	0.00059994	0.00647001	0.922371	20	0.19748	0.539918	0.798849	20	0.0108989
52	ADB27602.1	475	44685.5	GTVATGR;TLDEGFAGDNVGILLR;EHILLAK;TIGAGVVSK;TFLMAIEDVFSITGR;NMITGAAQMDGAILVVSAADGPMPQTR;QVGVPHIVVFLNK;MTAELIYPVAIEEGMR;HYAHVDCPGHADYVK;TKPHVNIGTIGHVDHGK	0;1;0;0;0;0;0;0;0;0	1	19	22445;103847;276917;276928;276930;276934;276936;276937;276940;276941;276942;276944;276947;276948;276949;276950;276953;276955;276957;276960;134745;134746;137198;137199;137200;278929;278937;281723;281737;280581;282371;361883;361884;361886;362198;362199;362200;362201;362203;362514;288128;288129;299201;299204;299205;299208;299212;299213;299217;299218;299219;299220;299221;299224;301758;301759;301760;3…	YP_004072649.1	translation elongation factor EF-Tu (chloroplast) [Thalassiosira oceanica CCMP1005]	1.36236	19	0.00059994	0.00858009	1.07564	17	0.0138986	0.115713	1.30648	18	0.00069993	0.0090041	1.11569	18	0.0717928	0.298089	1.13918	19	0.00559944	0.0446469	1.16893	19	0.0317968	0.134987	0.94913	18	0.220178	0.59218	0.974871	19	0.751425	0.90814	1.00619	19	0.90401	0.979117	1.26591	17	0.0001
53	AKF18188.1	38	46169	IGLFGGAGVGK;AHGGVSVFGGVGER;MPSAVGYQPTLATEMGALQER;VVDLLAPYR;YVSLEETIK;FTQAGSEVSALLGR;VGLTALTMAEYFR;IETADGIGNIVEVQQLLGDNK;VALVYGQMNEPPGAR;TVLIMELINNIAK;DVNKQDVLLFIDNIFR	0;0;0;0;1;0;0;0;0;0;0	1	19	37083;182848;182850;182851;182856;182857;182858;182859;182862;182863;43323;196124;196128;196133;196134;196135;196137;196138;196141;196157;91116;342710;342713;342714;342715;343700;343701;343702;343703;343708;343709;343710;343714;343715;343717;343718;343720;344695;344696;344699;344700;344703;344706;357352;357947;109888;109889;109895;109904;109905;109907;109908;109909;109910;109912;201792;201793;201…	AKF18228.1;AKF18168.1;sp|A0T0R6.1|ATPB_THAPS;XP_002297536.1;EED86176.1;YP_874528.1;ABK20751.1;AIR75570.1;AIR75429.1	ATP synthase beta subunit, partial (chloroplast) [Cyclotella meneghiniana]	1.05813	18	0.0807919	0.287154	0.841135	17	0.0001	0.00353298	0.852416	18	0.0154985	0.0945885	0.703659	18	0.0001	0.00261133	2.01316	19	0.0001	0.00219734	0.61654	18	0.0001	0.0016362	0.897105	19	0.0668933	0.326367	0.260287	19	0.0001	0.00166743	0.894664	18	0.0108989	0.0871428	1.93217	19	0.0001
54	EED86434.1	1357	46194.3	ELPYALYDSQDILVR;MKELPYALYDSQDILVR	1;1	2	19	124429;294616;294617;294618;294619;294620;294621;294622;294626;294633;294634;294635;294636;294637;331332;331333;331334;349018;349829	XP_002297284.1	hypothetical protein THAPSDRAFT_bd1766 [Thalassiosira pseudonana CCMP1335]	1.70565	19	0.0001	0.00219734	1.05528	19	0.325167	0.683558	1.54381	19	0.00019998	0.00360164	0.974259	19	0.674833	0.892606	1.67276	18	0.0001	0.00219734	1.36001	19	0.00639936	0.0397202	1.22566	18	0.00349965	0.044726	1.12367	19	0.220578	0.505421	1.35836	19	0.0001	0.0035271	1.65442	19	0.0001
55	EED87340.1	668	69508.3	LETMIDIR;TSPFPYGGAR;MAIASPGNDFR;AVGSSQNVSMVNTVLNTIVAEK;AVCDAAEEVVPANLWTLATYK	1;0;1;0;1	3	19	93775;93785;93786;111631;111644;111647;111648;111658;111659;111661;150608;150612;150617;150618;150619;150620;150621;155567;155568;155570;155571;155573;357753;357754;357755;357756;357757;358322;358324;358325;358326;358329;358330;358331;358334;358335;358336;359657;359658;359659;359660	XP_002295274.1	hypothetical protein THAPSDRAFT_270138 [Thalassiosira pseudonana CCMP1335]	0.959038	19	0.464554	0.764992	0.960035	19	0.408359	0.724275	0.662778	18	0.0001	0.00211861	0.729474	14	0.0001	0.00261133	0.924186	19	0.0378962	0.183573	0.865954	17	0.00149985	0.0138448	1.02387	19	0.49695	0.821379	0.945758	18	0.174483	0.439501	1.31525	19	0.0001	0.0035271	1.18298	19	0.00709929
56	EED89642.1	474	47362.9	GTVVTGR;EHILLAK;LVVFLNK;TVGTGIVTK;TTLTQAITK;TTCTGVEMFK;LLDYGMAGDNVGALLR;DKPHVNIGTIGHVDHGK;NMITGAAQMDGGILVVAATDGPMPQTR	1;0;1;1;1;1;1;1;1	8	19	26359;134745;134746;137577;137580;137587;151209;183148;183149;232894;236522;274643;274648;274654;352495;361881;361882;361885;361887;362202;362204	XP_002293181.1	translation factor elongation factor ef-tu [Thalassiosira pseudonana CCMP1335]	1.1896	19	0.0745925	0.274879	1.31164	19	0.00149985	0.0264973	1.10337	18	0.340366	0.668483	1.24603	18	0.00729927	0.0626347	0.859975	18	0.00269973	0.0252068	1.13533	19	0.0941906	0.285854	0.94988	19	0.29627	0.680101	1.32501	18	0.00079992	0.00809357	1.1548	19	0.0665933	0.3048	1.1002	19	0.288571
57	XP_002288820.1	948	37417.3	YVGSMVADIHR;AGVAQLYGLAGEVNSTGDDQK;TLLYGGIYIYPADK	1;1;1	3	19	172264;172265;172266;172270;172278;172289;177529;177533;177534;177535;253086;253089;237455;350898;350900;350901;308597;308598;308603	EED94256.1;EJK72926.1	predicted protein [Thalassiosira pseudonana CCMP1335]	0.983576	19	0.821218	0.94922	0.895674	19	0.0549945	0.288082	1.27111	19	0.00089991	0.0111009	1.13552	19	0.0280972	0.161246	1.05272	19	0.344566	0.697803	1.03739	18	0.472353	0.734227	1.18897	19	0.00039996	0.0093601	1.24452	18	0.00289971	0.0240663	0.992406	17	0.857614	0.969126	0.788315	17	0.00439956
58	XP_002289051.1	1138	28291.4	EVAEAGVDMMVAGSAILK;AGLVFNPATSLDYAHHVK;EVAEAGVDMMVAGSAILKEPR	1;1;1	3	19	330970;330979;330980;330989;330994;330995;330997;330998;331000;331001;331002;331003;331004;331005;332398;342370;354497;354498;354499	EED94487.1	predicted protein [Thalassiosira pseudonana CCMP1335]	1.84749	19	0.0001	0.00219734	1.06236	19	0.107489	0.42463	2.10978	19	0.0001	0.00211861	1.17046	18	0.00049995	0.0091001	2.4501	18	0.0001	0.00219734	1.57411	19	0.0001	0.0016362	1.32313	16	0.0001	0.00367718	0.897414	19	0.123388	0.361924	0.979678	19	0.611739	0.89257	1.78882	17	0.0001
59	XP_002290530.1	597	68481.6	QMSTLIK;LGSFVISGVQR;FEELNAVLFK;TNKVEVIESPSGR;AKFEELNAVLFK;ELRPEEISAMVLAELK	1;1;1;1;1;1	6	19	133624;145616;241366;241367;241371;241374;282485;282487;323308;323309;323310;334148;334189;334190;334191;335462;335465;335466;335467	EED92282.1	heat shock protein, HSP70, hsc70 [Thalassiosira pseudonana CCMP1335]	0.795448	19	0.00139986	0.0163802	1.00289	18	0.956904	0.983652	0.807255	18	0.0134986	0.0859048	1.0018	16	0.976602	0.993645	0.776629	19	0.0001	0.00219734	0.876847	16	0.00649935	0.0400645	0.89693	19	0.0339966	0.211035	1.03328	17	0.531247	0.792689	0.708136	19	0.00489951	0.0486973	0.613113	19	0.00079992
60	XP_002295724.1	533	11358.4	TLYGFGG;VFLENVIR;ISGLIYEETR;DNIQGITKPAIR	1;1;1;1	4	19	30032;30033;93568;93571;93572;93577;151326;151329;151331;151332;151333;151338;151339;234599;265522;265532;265537;265539;265541	EED89470.1;XP_002295814.1;XP_002288196.1;ACI64441.1;EJK69577.1;EED88843.1;XP_002293009.1;XP_002293834.1;ACI64887.1;XP_002296170.1;ACI64531.1;EED93632.1;EJK72475.1;EJK63755.1	predicted protein [Thalassiosira pseudonana CCMP1335]	0.395663	19	0.0001	0.00219734	0.511094	19	0.0001	0.00353298	0.195022	19	0.0001	0.00211861	0.25425	19	0.0001	0.00261133	0.828818	18	0.0001	0.00219734	0.252737	17	0.0001	0.0016362	0.804946	19	0.00489951	0.0558792	0.253229	19	0.0001	0.00166743	1.50447	17	0.0001	0.0035271	1.53407	19	0.00029997
61	XP_002296787.1	551	50150.7	ITMLDGVLSSR;CGAGTNNVPVAR;ELVIAGMLLGSR;TLAVIGLGHIGAATAR;MTELGIPVFNTPGANANAVK	1;0;1;1;0	3	19	154717;154719;154730;154732;154733;154738;154744;162346;181243;181244;181250;181252;181254;181255;181256;242897;242898;242901;242905;242917;348505	EED86988.1	predicted protein [Thalassiosira pseudonana CCMP1335]	0.844976	19	0.0459954	0.203474	1.03207	19	0.468853	0.76764	0.746908	18	0.0001	0.00211861	0.977918	19	0.762624	0.921695	0.831248	19	0.00029997	0.00514806	0.69574	18	0.00019998	0.00281222	0.895204	19	0.00949905	0.0930287	0.767184	19	0.00739926	0.0462711	1.14101	19	0.0459954	0.235584	1.11105	19	0.115188
62	EED95896.1	1307	32500.6	GTADCFAK;YTGIVDCFSR;VASEQGIGAFWR;LLIQTQDANPK;ADKNTEFAK;YFPTQAFNFAFK;IMKDEGTSALFK	1;1;1;1;1;1;1	7	18	149107;149112;162846;162847;162854;194079;194081;194087;248339;248343;248350;248353;265861;265869;292894;315542;317352;317353	XP_002286255.1	adenine nucleotide translocator; ATP/ADP translocase [Thalassiosira pseudonana CCMP1335]	0.574165	18	0.0001	0.00219734	0.678359	17	0.0001	0.00353298	0.312122	18	0.0001	0.00211861	0.390312	18	0.0001	0.00261133	0.474695	18	0.0001	0.00219734	0.408569	18	0.0001	0.0016362	1.00154	18	0.978202	0.994763	0.857272	15	0.0001	0.00166743	1.57307	18	0.0001	0.0035271	0.757562	18	0.00329967
63	EED96084.1	24	20987.7	NISFTVWDVGGQDK;ILMVGLDAAGK;DAVLLVFANK;HYYQNTQGLIFVVDSNDSDR;MLNEDELRDAVLLVFANK;LGEVVTTIPTIGFNVETVEYK	1;1;1;1;1;1	6	18	43029;306149;306151;306154;212233;212236;216199;216222;216230;212787;212788;212790;212791;212794;349579;349581;350740;359313	XP_002286443.1;EJK46251.1	adp-ribosylation factor [Thalassiosira pseudonana CCMP1335]	1.10481	18	0.0236976	0.125968	1.06926	17	0.0647935	0.311354	1.11407	17	0.069893	0.256369	1.14393	16	0.00159984	0.0201602	0.94608	15	0.168283	0.465654	1.04248	18	0.534047	0.772736	1.03989	18	0.572143	0.853517	1.12868	18	0.113089	0.341733	1.12005	18	0.10269	0.387293	1.03866	18	0.608339
64	EJK47917.1	1015	22200.1	VIISAPSADAPMYVVGVNHK;KVIISAPSADAPMYVVGVNHK	1;1	2	18	108948;349707;349709;349711;349712;349714;350446;350447;350449;350450;350451;350452;361078;361079;361080;363660;363661;363663	-	hypothetical protein THAOC_33331 [Thalassiosira oceanica]	0.883587	18	0.0329967	0.16027	0.982046	18	0.705529	0.895081	1.14393	18	0.0283972	0.141671	1.33493	17	0.0001	0.00261133	1.0149	18	0.773523	0.921723	1.04075	18	0.394761	0.674975	1.13698	18	0.00449955	0.0519756	1.17974	18	0.00529947	0.0361528	0.711474	17	0.00039996	0.00827044	0.582686	16	0.0001
65	XP_002292096.1	1381	11850.2	SEVEYLAMLAK;MVLIASNCPPLR;KSEVEYLAMLAK	1;1;1	3	18	19130;19134;251065;251084;254390;254392;254396;254398;254402;254403;206900;206930;206931;211008;320411;322243;322245;322246	EED90947.1	predicted protein [Thalassiosira pseudonana CCMP1335]	0.57529	17	0.0001	0.00219734	0.707411	17	0.0001	0.00353298	0.450968	18	0.0001	0.00211861	0.549637	18	0.0001	0.00261133	0.691743	17	0.0001	0.00219734	0.312167	17	0.0001	0.0016362	0.731931	18	0.0001	0.00367718	0.322022	18	0.0001	0.00166743	1.17769	18	0.0162984	0.117754	1.22319	18	0.00039996
66	EED95846.1	858	39942.8	VPTIDVSVVDLTCK;VIPSLQGK;VIYSAPAK;AQAIIDGGAK;YDTIHGIAK;AASGNIIPSSTGAAK;LVAWYDNEWGYSGR;EVGWGALGADYVCESTGVFLTK;AIHDEFDIQEALMTTVHAMTATQAVVDSSSR	0;0;0;1;0;0;0;0;0	1	17	135909;303485;303486;303488;303490;303491;303492;303493;303494;303495;303498;303499;303500;303501;303502;303503;303504;303505;303506;303507;303509;140371;140372;140374;140375;140376;140377;140380;140393;142576;172443;172451;172458;172459;172460;172462;172463;172464;172471;172472;172473;172475;172477;172481;172482;172483;172484;194430;194431;194433;194435;194436;194438;194440;194441;194442;194446;…	XP_002286205.1	glyceraldehyde-3-phosphate dehydrogenase precursor, partial [Thalassiosira pseudonana CCMP1335]	1.40452	17	0.00029997	0.00505183	1.26491	17	0.0001	0.00353298	1.92481	17	0.0001	0.00211861	1.75832	13	0.0001	0.00261133	1.73883	17	0.0001	0.00219734	1.415	16	0.00819918	0.0477622	0.898712	15	0.00289971	0.0392878	0.752426	15	0.0001	0.00166743	0.818618	17	0.00409959	0.0431296	1.5175	17	0.0001
67	EED96348.1	710	33769	APEGSVLVAMLPDTGER;GYPCVITMAEPFSVER;KAPEGSVLVAMLPDTGER	1;0;1	2	17	286007;286008;286009;286010;286012;304217;304219;304220;304221;304225;306296;306299;306304;336360;336361;336362;337442;337449;337452;338503;338506;338507;338509;338511;338515;338516;338517;338518	XP_002286707.1	cysteine synthase [Thalassiosira pseudonana CCMP1335]	1.46897	17	0.00089991	0.0113401	0.985644	16	0.768623	0.913546	1.18236	16	0.0186981	0.105235	0.870624	17	0.0717928	0.298089	1.1917	17	0.00459954	0.0383721	1.12157	17	0.120688	0.339435	0.999803	17	0.9962	0.9993	0.93871	17	0.29937	0.605124	1.39161	16	0.0001	0.0035271	1.6277	16	0.0001
68	EJK47098.1	481	27021.6	LVHFLEGGEAGNR;AQGGFYVPAQPK;EANNFLWPFK;LIEPYVTYGYPTR;IPIADNSVIEEGVGSVGIK;LVHFLEGGEAGNRGEEINK	0;1;0;1;1;0	3	17	213902;213903;252919;252920;252925;253559;253568;253893;253897;253899;253900;253910;253934;306879;306889;306890;306893;339278;339279;339280;339283;349764	-	hypothetical protein THAOC_34210 [Thalassiosira oceanica]	0.54734	22	0.0001	0.00219734	0.876288	22	0.00349965	0.0460319	0.455877	22	0.0001	0.00211861	0.742405	22	0.0001	0.00261133	0.637042	22	0.0001	0.00219734	0.54949	22	0.0001	0.0016362	0.683301	22	0.0001	0.00367718	0.571312	22	0.0001	0.00166743	0.999567	22	0.993601	0.997683	1.00634	21	0.926207
69	EJK58980.1	417	21797.9	AAQMGILGLMVHEK	1	1	17	295816;295817;295818;295819;298405;298436;298443;298445;298447;298448;298449;298450;298451;298453;301102;301109;301110	-	hypothetical protein THAOC_20854 [Thalassiosira oceanica]	0.730195	17	0.00019998	0.00367718	0.8707	16	0.0009999	0.0191683	0.511844	17	0.00039996	0.00610447	0.602648	17	0.00059994	0.010199	1.12947	16	0.00039996	0.00643507	0.399355	15	0.0001	0.0016362	1.03379	15	0.265773	0.648509	0.358346	17	0.0001	0.00166743	1.16306	16	0.00589941	0.0558581	1.33354	17	0.00089991
70	YP_009093423.1	296	54149.3	EAYPGDVFYLHSR;ATLIIYDDLTK;LVESMAPGIISR;QMSLLLR;QILEGGTVK;INIRPDEISSIIR;VVNPLGLPIDGK;VDNIGTVLQVGDGIAR;SVCEPLQTGITSIDAMIPIGR;VYGLDQVMSGELLEFEDK	0;0;0;0;1;0;1;1;0;0	3	17	17871;250028;250036;250041;250042;250044;250050;250052;250053;250054;250055;250059;250061;250066;304524;304525;304530;304532;304540;304543;304544;304545;304546;304547;304548;304549;304551;304552;336512;18892;80990;253655;253656;253659;253660;253661;253664;253668;253669;253670;253671;253672;253675;253676;253679;253680;253681;253682;253683;306669;306670;36275;38230;180699;180701;180703;180704;18071…	AIR76096.1	ATP synthase CF1 alpha subunit (chloroplast) [Thalassiosira weissflogii]	0.722471	17	0.00029997	0.00505183	0.743936	17	0.00039996	0.0105989	0.790367	17	0.0380962	0.172824	0.811691	17	0.0507949	0.240875	1.50031	17	0.00069993	0.00941249	0.392077	15	0.0001	0.0016362	0.953897	17	0.477952	0.812519	0.237992	17	0.0001	0.00166743	1.20344	17	0.00409959	0.0431296	1.86762	17	0.00019998
71	EED90123.1	1203	21649.6	GAFTGSVAASMVK;SVGCEYVLCGHSER;TLFSDSDVNINAK	1;1;1	3	16	244956;244962;248500;248506;269788;269789;269790;269792;316470;316472;316473;283794;283804;283806;283809;283814	XP_002292927.1	triose-phosphate isomerase, partial [Thalassiosira pseudonana CCMP1335]	1.21806	16	0.0223978	0.123427	1.05897	16	0.410559	0.724959	1.20874	16	0.0150985	0.0928068	1.05001	16	0.333567	0.692497	1.57974	15	0.0001	0.00219734	1.25955	16	0.00039996	0.00486438	1.10045	15	0.0131987	0.114899	0.825034	16	0.00519948	0.0356056	0.751599	16	0.00649935	0.0599607	1.11956	16	0.214579
72	EED92420.1	1422	93076	ADVSGMLR;FFMTDAPR;RFFMTDAPR;FSSITGVVSTEEK;FFGNECDNFGLK;FTYGYQEFVNTYGIPR;LSAIQFTDLNPDLTPFQR	1;1;1;1;1;1;1	7	16	56684;91930;91931;91937;138635;276529;287691;287692;316278;329215;329221;329222;329223;329224;329225;329226	XP_002290668.1	v-type h-atpase [Thalassiosira pseudonana CCMP1335]	0.762353	15	0.00059994	0.00858009	0.879493	15	0.00559944	0.0615256	0.626959	15	0.00039996	0.00610447	0.735279	15	0.00219978	0.0264267	0.832473	16	0.00259974	0.0246565	0.563029	16	0.0001	0.0016362	0.922681	15	0.00419958	0.0494617	0.617321	15	0.0001	0.00166743	1.37256	16	0.00019998	0.00553483	1.17706	14	0.00129987
73	EED92694.1	179	115577	AWALAATR;LPEAAFFAR;TFEVSELPVR;KIDVAPK;VEEIVSLWK;LPLICSASEDGTVR;DLGACELYPQSIK;GVNCIDYYPSGDKPYILSGADDR	1;1;1;1;1;1;1;1	8	16	59308;59313;59314;102841;150096;150105;150114;209037;215881;242112;242120;242121;295155;295171;295179;364936	XP_002289157.1	coatomer protein subunit beta2 [Thalassiosira pseudonana CCMP1335]	0.947343	16	0.520848	0.807718	0.949563	14	0.0534947	0.284804	0.939584	16	0.263574	0.577444	0.92315	15	0.108989	0.377656	0.90988	15	0.089991	0.32368	0.940981	16	0.364764	0.644053	1.15652	16	0.00969903	0.0939659	1.18632	16	0.00079992	0.00809357	0.997782	16	0.977202	0.994138	0.802034	16	0.00179982
74	EED92716.1	530	37347.9	GGLPWQGLK;ELQNAPGFAK;TVLMIADQMLER;FEAKPNIAYLR;DIKPANFVTDGGR;GSGNFIYCIDFGLSK;VGGGSFGDIYLGVGANGEK	1;1;1;1;1;1;1	7	16	176457;208967;208976;208978;208979;208982;219075;222855;226677;226678;226735;226736;264788;277729;319461;331482	XP_002289179.1	casein kinase-like protein [Thalassiosira pseudonana CCMP1335]	0.622995	16	0.0001	0.00219734	0.769963	15	0.0009999	0.0191683	0.568397	14	0.0001	0.00211861	0.727421	16	0.00109989	0.0154844	0.852109	16	0.00069993	0.00941249	0.800637	16	0.00139986	0.013332	0.894213	16	0.0274973	0.186278	0.83858	16	0.0123988	0.0695644	0.867509	16	0.0425957	0.227388	0.814344	13	0.00179982
75	EED93403.1	109	46955.5	VSVGLDVASSEFK;NQYDLDFK;VNQIGSISESIDAVK;DSSLLLSGDELIAFYK;EVGKDVQIVGDDLTVTNPVK;HYADIAGNPTPDVLPVPCFNVINGGEHAGNK	1;1;0;1;1;0	4	16	267834;267835;267838;267839;267840;267842;267854;269602;305391;305392;305393;305394;305395;305404;305405;329131;329133;362258;362260;362261;362262;362263;362265;369555	XP_002289866.1	alpha enolase [Thalassiosira pseudonana CCMP1335]	1.80164	16	0.0001	0.00219734	1.59936	16	0.0001	0.00353298	2.17262	16	0.0001	0.00211861	1.97356	16	0.0001	0.00261133	2.11965	16	0.0001	0.00219734	2.86299	15	0.0001	0.0016362	1.26333	16	0.0001	0.00367718	1.61721	16	0.0001	0.00166743	0.640592	16	0.0001	0.0035271	1.00302	15	0.950905
76	EED93836.1	1308	22315.4	DSSVAVVVYDVTNR;SLIPSYIR;ASFLNTSK;LVFLGDQSVGK;DGLLFMECSAK;GNDVVICLVGNK;HYQATIGIDFLSK	1;1;1;1;1;1;1	7	16	72919;243425;243434;243441;243442;300162;81839;148613;230403;230404;230408;254534;254539;254547;257831;295007	XP_002288400.1	rab-like rab-type small G protein [Thalassiosira pseudonana CCMP1335]	1.1951	14	0.00059994	0.00858009	1.14159	16	0.0193981	0.142675	1.20141	13	0.00549945	0.0438253	1.16202	15	0.00539946	0.049642	1.02241	14	0.548745	0.835874	1.01571	16	0.826217	0.943051	1.17947	16	0.00569943	0.0622447	1.19319	16	0.0176982	0.0921229	1.06235	15	0.311769	0.688187	0.94796	16	0.324368
77	EED94748.1	278	29407	FIVIVDESK;SGMVVGLGTGSTAYFAVER;EQAEELGIPLVTLDTHSK;TKEQAEELGIPLVTLDTHSK	1;1;1;1	4	16	202820;202821;202822;202824;202840;202841;202842;202845;202846;309862;309866;311853;311854;344900;363916;363917	XP_002287305.1	predicted protein [Thalassiosira pseudonana CCMP1335]	2.03631	14	0.0001	0.00219734	1.19354	16	0.00579942	0.0629552	1.57089	14	0.0001	0.00211861	0.91546	16	0.133987	0.429615	1.10113	16	0.0490951	0.221071	1.62483	13	0.0001	0.0016362	0.862123	16	0.00069993	0.0143327	1.26143	15	0.0001	0.00166743	1.04712	14	0.248275	0.606766	1.46216	16	0.0001
78	EJK75978.1	144	154870	VLDIYER;LQNIASMR;APMFSFTR;YCIIEVNAR;GMNQPCIDLR;VLLVGSGGLSIGQAGEFDYSGSQCIK;TLHANFISLATR;ATGYPLAYVATK;LGSSMLSVGEVMAIGR;AFATSNQILIDQDLR;HLGIVGECNIQYALNPK	1;1;0;0;0;0;1;0;1;1;0	5	16	71043;71044;77373;88492;137691;158456;158457;163511;163514;163521;194323;200137;200138;251275;260938;264048;264097;267216;267217;279829;279830;279834;279835;279836;279883;341371	-	hypothetical protein THAOC_02285 [Thalassiosira oceanica]	0.854773	25	0.0126987	0.0797321	1.00804	24	0.842616	0.942516	0.821733	25	0.0160984	0.0963229	1.02364	24	0.653735	0.891065	0.84938	23	0.0001	0.00219734	0.946112	25	0.29787	0.578112	0.914253	24	0.00989901	0.0948831	1.00141	25	0.979602	0.991864	0.94383	24	0.363364	0.732621	0.893536	24	0.144286
79	XP_002296360.1	1451	88189.8	LLTTPSEIR;SVVAGVGAYSR;GVLPPISK;GVSLPAGSIGAAR;IVECGMDIAAGSAICR;VPIAEFGGIQEAMAK;LATQCFDANATVAVPNSLGPGELLVR	1;1;1;1;1;1;1	7	16	105338;115587;130684;130685;130687;143531;282877;285524;285528;305503;305504;307469;307470;307482;307485;361862	ACI65077.1	acyl-CoA dehydrogenase-like protein [Thalassiosira pseudonana CCMP1335]	1.05241	15	0.190181	0.475161	0.934551	16	0.153985	0.515763	1.09876	16	0.330067	0.661972	1.00836	15	0.89581	0.970516	0.866415	14	0.029797	0.152975	0.822781	16	0.00179982	0.0158808	0.875086	16	0.050295	0.275476	0.783296	15	0.0001	0.00166743	1.24253	16	0.00889911	0.0758744	1.3883	14	0.0001
80	ADB27483.1	222	39569.6	LALQLNVIDPK;FGMHAEIR;AFEPGLLAK;IPMVDLPLGATEDR;AIADLLPEIEVIK;FVLVGSGNPEEGELRPQLLDR	1;1;1;1;1;1	6	15	73682;244577;244578;244579;85148;173200;173204;244215;244216;244221;244223;244224;244231;283877;347292	YP_004072529.1	magnesium chelatase ATPase subunit ChlI (chloroplast) [Thalassiosira oceanica CCMP1005]	0.915361	15	0.209879	0.504943	0.971491	14	0.581642	0.847059	1.26185	15	0.00079992	0.0100046	1.3231	14	0.00019998	0.00462005	2.06918	15	0.0001	0.00219734	1.38757	15	0.00089991	0.00925622	1.15143	15	0.00439956	0.0511484	0.777158	15	0.00769923	0.0474874	0.485412	15	0.0001	0.0035271	0.826666	15	0.0156984
81	AFO84283.1	280	35595.7	REGVSLWER;VINTWADIINR	1;1	2	15	135729;192591;192596;192605;192606;192610;192611;192618;192623;192624;192625;192628;192629;192632;192654	AFO84278.1;AIR76210.1;ADB27608.1;YP_874574.1;YP_004072655.1;sp|A0T0W2.1|PSBA_THAPS;YP_874620.1;AIR75891.1;AIR75521.1;YP_004072608.1;YP_009093264.1;AIR75475.1;ABK20843.1;ABK20797.1;AIR75937.1;ADB27561.1;AIR75616.1;AIR76164.1;YP_009093218.1;YP_009093491.1;AIR75662.1;YP_009093537.1	photosystem II protein D1, partial (chloroplast) [Stephanodiscus hantzschii]	0.458274	15	0.0001	0.00219734	0.757714	14	0.00029997	0.00858009	0.348562	15	0.0001	0.00211861	0.616589	15	0.00089991	0.0141012	0.745455	14	0.00019998	0.00371509	0.626862	14	0.0001	0.0016362	0.740699	15	0.00209979	0.0310149	0.568538	15	0.0001	0.00166743	1.42392	15	0.00209979	0.0279816	1.49855	15	0.00209979
82	AIR75477.1	348	9287.28	SLGLAY;CETACPTDFLSVR;IYDTCIGCTQCVR;ACPTDVLEMVPWDGCK	1;1;1;1	4	15	17751;17752;250555;268492;268493;337891;337892;337894;337895;337896;337897;337898;337899;337900;339025	AIR75660.1;YP_009093493.1;YP_004072656.1;AIR75618.1;ADB27609.1;AIR76208.1;YP_874576.1;YP_009093262.1;YP_874618.1;ABK20799.1;XP_002297559.1;YP_009093220.1;AIR75519.1;sp|O96804.3|PSAC_SKECO;AIR75935.1;YP_004072607.1;sp|A0T0W4.1|PSAC_THAPS;EED86144.1;ADB27560.1;AIR76166.1;ABK20841.1;YP_009093535.1;CAA10625.1;AIR75893.1	photosystem I subunit VII (chloroplast) [Cyclotella sp. L04_2]	0.977107	15	0.818918	0.948997	0.909142	14	0.0268973	0.179515	1.28872	13	0.0215978	0.118953	1.1306	14	0.229877	0.589756	1.89139	15	0.0001	0.00219734	1.69107	13	0.00019998	0.00281222	1.2675	12	0.0001	0.00367718	0.958269	14	0.411959	0.708632	0.646606	13	0.00029997	0.00719528	1.04606	15	0.650035
83	EED91133.1	291	30398.4	YVYGTAIPSGR;DDLIMHALK;ALVGCVSGDGELTK;LLQVEYAMESVK;RPYGVGLLVASFDK;ILEIDDHLGIGIAGLTADAR;FTLIEGEELQPYLDR	1;1;1;1;1;1;1	7	15	152289;152294;204258;280693;280700;280701;280704;281436;281437;284139;284143;299819;299823;327946;333742	XP_002291026.1	20S proteasome subunit alpha type 1 [Thalassiosira pseudonana CCMP1335]	1.26371	15	0.00189981	0.0207482	1.24336	15	0.00059994	0.0138602	1.15481	13	0.059994	0.236308	1.18557	15	0.00069993	0.0114661	0.911733	14	0.0748925	0.292113	0.854121	15	0.0436956	0.170243	1.00869	14	0.851715	0.961121	0.955699	15	0.568843	0.818934	1.01409	15	0.869613	0.971876	0.914942	15	0.370763
84	EED92762.1	1597	55997.9	VAWMDDLGVVR;GDLFAGGSMVGFLR;FCQSYMTELAK	1;1;0	2	15	176601;176602;176606;176607;176614;181812;181818;181819;181821;220743;220746;220747;224571;224576;224588;275358	XP_002289225.1	glutamate dehydrogenase [Thalassiosira pseudonana CCMP1335]	1.01632	13	0.69563	0.885651	1.22467	14	0.00259974	0.0374779	0.655275	14	0.0001	0.00211861	0.87757	15	0.0420958	0.212484	0.874897	15	0.00389961	0.0339473	0.937183	13	0.236276	0.505704	0.914234	15	0.113589	0.435027	0.893674	15	0.211779	0.492783	1.58428	15	0.0001	0.0035271	1.55846	15	0.0001
85	EED95038.1	1568	15810.9	EVPGAYELPYAAK;GETLHFEYISEAVSK	1;1	2	15	281023;281025;281027;281029;281031;281037;281038;281039;322965;322967;322968;322973;322974;346902;346906	XP_002287595.1	predicted protein, partial [Thalassiosira pseudonana CCMP1335]	1.85049	14	0.0001	0.00219734	1.31037	15	0.0001	0.00353298	2.16377	15	0.0001	0.00211861	1.67571	13	0.0001	0.00261133	1.14769	14	0.00049995	0.00763483	1.76822	14	0.0001	0.0016362	1.22041	14	0.00019998	0.00621317	1.78643	15	0.0001	0.00166743	1.04706	15	0.351065	0.721169	0.980685	15	0.69903
86	EJK51577.1	1450	80976.9	SVETSPFLEK;APFDMFEGGAK;HSEFIGFPIK;DSSQSAYMSSK;ADLVNNLGTIAK;RAPFDMFEGGAK;QPGIYYITGESK;TMEINPTNSIITALR;KHSEFIGFPIK;ANNTLTIEDSGIGMTK;KTMEINPTNSIITALR;LADSPCCLVTGEYGWSANMER;MDDKQPGIYYITGESK	0;0;1;0;0;0;0;1;1;1;1;0;0	5	15	224209;224214;224216;231904;233207;236773;236774;245702;245708;245709;245710;245711;245716;245717;245718;245719;245720;245721;265423;265424;268538;268546;268565;271238;273932;273933;273935;273946;276924;276927;276954;276956;311147;311148;317940;317946;317953;333336;351733;351734;351735;351736;352468;352469;353487;353490;353491;353492	-	hypothetical protein THAOC_29237 [Thalassiosira oceanica]	0.667264	15	0.00019998	0.00367718	0.963159	15	0.549745	0.826673	0.699526	15	0.00059994	0.00806337	1.01917	15	0.812719	0.936624	0.818379	15	0.00549945	0.0440445	0.558822	15	0.00019998	0.00281222	0.72352	12	0.0001	0.00367718	0.537642	15	0.0001	0.00166743	0.785545	15	0.0213979	0.144717	0.81344	15	0.0522948
87	XP_002288891.1	267	20521.5	LQIWDTAGQER;LLMIGDSGVGK;TITTSYFR;GAQGILLVYDVTDR;NDINVEQSFLGIAR;GAQGILLVYDVTDRR;NWISQIQQHADVHVNK;YANDSFSPTFITTIGIDFK	0;1;1;1;1;1;1;1	7	15	41866;192953;192955;192956;192958;192959;192961;192963;192964;192965;192966;192970;192971;192972;54617;212771;216687;93151;93152;242633;242634;299472;254773;254780;254784;274272;274273;340691;352949	XP_002288408.1;EED94327.1;EED93844.1	rab-type small GTPase, partial [Thalassiosira pseudonana CCMP1335]	1.1239	15	0.105389	0.339128	1.09515	15	0.0614939	0.302765	1.2306	14	0.00179982	0.018956	1.23916	13	0.00069993	0.0114661	1.26444	15	0.00139986	0.0154758	1.3001	15	0.00559944	0.0357411	1.30119	15	0.00209979	0.0310149	1.36087	15	0.00449955	0.0324148	0.932843	15	0.339466	0.709709	0.88908	15	0.163784
88	XP_002292331.1	1296	31903.2	GGAIFLVEGLR;AFLPGSHLTGR;GTVVQYDK;GDVIDGIVK;GGCIVDIGAK;CMIIDHDK	1;1;1;1;1;1	6	15	135854;135855;135856;143517;143519;161905;161906;161910;163738;163739;163740;163752;187110;187119;197961	EED90306.1	RS1, ribosomal protein 1, partial [Thalassiosira pseudonana CCMP1335]	1.03061	13	0.465353	0.765116	0.996235	15	0.947405	0.978972	1.091	14	0.132187	0.397918	1.0122	15	0.868313	0.957003	1.30701	15	0.00019998	0.00371509	1.20544	14	0.00189981	0.0162069	1.12906	15	0.0734927	0.34578	1.01553	13	0.727127	0.901278	0.679428	15	0.00189981	0.0262904	0.77121	15	0.020498
89	YP_009093479.1	193	20532.8	CSESPAFTK;SELLCGTDGLPHLVADGR;AVSTSANPSESEIIINVPLALK	1;1;1	3	15	196632;196635;196643;310896;310897;310898;310899;310900;310901;310902;310903;357476;357477;357478;357479	AIR76152.1	photosystem I subunit III (chloroplast) [Thalassiosira weissflogii]	0.633964	15	0.0001	0.00219734	0.63734	14	0.0001	0.00353298	0.562654	15	0.0001	0.00211861	0.586925	15	0.0001	0.00261133	0.914268	15	0.0844916	0.310089	0.436035	14	0.0001	0.0016362	1.04465	15	0.459454	0.803822	0.486509	13	0.0001	0.00166743	1.2459	14	0.00019998	0.00553483	1.04561	13	0.260574
90	AAB70106.1	187	20198.4	ISQLAFLGQITTR;AAMMGILGLMVHEQL	1;0	1	14	225832;225838;225839;225840;225842;225843;225845;225846;225847;225848;225849;225850;225851;225852;265428	AAB80924.1	fucoxanthin-chlorophyll a/c light-harvesting protein, partial [Skeletonema costatum]	0.837991	13	0.00609939	0.0457963	0.982924	15	0.830917	0.93742	0.485333	15	0.00139986	0.0154672	0.506349	15	0.00119988	0.0167611	0.952957	14	0.584042	0.853855	0.660624	15	0.0009999	0.0100549	0.857457	14	0.0377962	0.227789	0.654787	15	0.00079992	0.00809357	2.32551	15	0.0001	0.0035271	2.37749	15	0.0001
91	AIR75402.1	295	54324.4	EAYPGDVFYLHSR;ATLIIYDDLTK;LVESMAPGIISR;QMSLLLR;INIRPDEISSIIR;ASTVAQVVNLLDEK;SVCEPLQTGITSIDAMIPIGR;VYGLDQVMSGELLEFEDK	0;0;0;0;0;1;0;0	1	14	17871;250028;250036;250041;250042;250044;250050;250052;250053;250054;250055;250059;250061;250066;304524;304525;304530;304532;304540;304543;304544;304545;304546;304547;304548;304549;304551;304552;336512;18892;80990;253655;253656;253659;253660;253661;253664;253668;253669;253670;253671;253672;253675;253676;253679;253680;253681;253682;253683;306669;306670;36275;38230;180699;180701;180703;180704;18071…	AIR75543.1	ATP synthase CF1 alpha subunit (chloroplast) [Cyclotella sp. L04_2]	1.06803	12	0.0819918	0.290274	1.02552	14	0.70383	0.895081	0.871613	13	0.0233977	0.124836	0.912573	14	0.371263	0.717059	1.63034	14	0.0001	0.00219734	0.540103	11	0.0001	0.0016362	0.81013	14	0.00189981	0.0292603	0.206542	14	0.0001	0.00166743	1.1833	13	0.00389961	0.0420084	2.46166	14	0.0001
92	AIR75421.1	177	25765	TFLFVGTK;MFPYIYTER;LPDVAIIIDQK;NNIHILDLVQTAQLLK	1;1;1;1	4	14	162764;162765;163541;163542;168477;168478;168483;244763;244765;244766;244767;334650;334651;334652	AIR75562.1;sp|A0T0Q8.1|RR2_THAPS;EED86156.1;ABK20743.1;YP_874520.1;XP_002297516.1	ribosomal protein S2 (chloroplast) [Cyclotella sp. L04_2]	0.603173	14	0.0001	0.00219734	0.921267	14	0.316468	0.680475	0.718688	12	0.00179982	0.018956	1.12128	12	0.0715928	0.298089	1.12492	14	0.0837916	0.310089	0.764393	14	0.00059994	0.00638989	0.961427	14	0.448655	0.789528	0.655542	14	0.00019998	0.00262893	0.613276	14	0.00019998	0.00553483	0.702125	14	0.00029997
93	EED89904.1	229	112302	VAATPESVSK;AFDVRPVTK;FFAGQMTAAGK;DILSVILGGYGTK;GQTYDALSSQANITGYR;QCEEVDIVITTAAIPGR;LPTTSSSLYSNNISK;LVKPGFNVLIEK;VLVVGTGVAGLAAIQTAK	1;1;0;0;1;1;1;1;1	7	14	186781;198298;198300;198301;198302;222133;225971;225982;267471;267472;302661;302662;302674;306356;311631;311633;317501;318378;318380	XP_002292708.1	hypothetical protein THAPSDRAFT_8524 [Thalassiosira pseudonana CCMP1335]	0.861925	14	0.0843916	0.295863	0.834773	13	0.00719928	0.074989	0.772573	14	0.0266973	0.136209	0.788359	14	0.0280972	0.161246	1.01581	13	0.732027	0.91868	0.853765	14	0.030197	0.130035	1.06805	14	0.369663	0.749306	0.937203	14	0.40436	0.701281	1.06228	14	0.254275	0.615666	0.974089	14	0.766223
94	EED90361.1	406	57252.8	YAGISTCFR;EFYESLGFPYR;VVCIVSGALNDAAVK;GYQVLQPPYFMNK;VPEVLVPFMGGIDFLPFER	1;1;1;1;1	5	14	118167;215974;215975;215978;280984;280985;280987;298768;298769;298772;308307;336494;337665;337669	XP_002292386.1	seryl-trna synthetase [Thalassiosira pseudonana CCMP1335]	1.29736	12	0.00249975	0.0254494	1.01949	13	0.739626	0.907906	1.04729	10	0.486551	0.776155	0.855172	13	0.0160984	0.112877	0.695135	14	0.0001	0.00219734	1.18049	14	0.0636936	0.219633	0.756597	13	0.0001	0.00367718	1.5024	12	0.00019998	0.00262893	0.928637	11	0.145785	0.467501	0.843237	12	0.00879912
95	EED92725.1	1220	46023.2	FFSYIPGMMSR;EIAALLVLDK;DDLVGQYVGHTAPK;VKEIAALLVLDK;AMGGVLLVDEAYYLYNAANDR	1;1;1;1;1	5	14	197880;211581;211582;296180;296184;296189;296193;296194;296195;296196;296197;296198;312195;347759	XP_002289188.1	predicted protein [Thalassiosira pseudonana CCMP1335]	0.93087	12	0.158284	0.438812	1.12021	11	0.010299	0.0966601	1.27808	13	0.00059994	0.00806337	1.55584	12	0.0001	0.00261133	1.10043	14	0.0106989	0.0714055	0.882338	13	0.00059994	0.00638989	0.984593	14	0.756124	0.932048	0.739061	13	0.0001	0.00166743	0.981738	14	0.831217	0.959178	0.98877	12	0.886511
96	EJK77607.1	1610	23798.3	SFDDYLAFAN;YGGFGAGSPEVIDPK;AILQDITELEVSQK	1;1;1	3	14	145475;295122;295166;308609;308610;308611;308614;308619;308620;308621;308622;308623;308624;308634	-	hypothetical protein THAOC_00549 [Thalassiosira oceanica]	2.1654	14	0.0001	0.00219734	1.86857	14	0.0001	0.00353298	2.35191	14	0.0001	0.00211861	2.1839	14	0.0001	0.00261133	2.02734	14	0.0001	0.00219734	2.59624	13	0.0001	0.0016362	1.3588	14	0.0001	0.00367718	1.81112	13	0.0001	0.00166743	0.810351	14	0.00049995	0.0097762	1.09813	13	0.166683
97	sp|A0T0T0.1|PSBD_THAPS	52	39248.7	NILLNEGIR;AYDFVSQELR;AFTPTQSEETYSMVTANR;SWMAAQDQPHENFVFPEEVLPR	1;0;0;1	2	14	13941;108762;108773;108775;166097;166098;166099;166103;166109;166110;324981;326572;326573;326575;326576;326577;359679;359680;359682;359683;360176;360178;360179;360180;360181;360182	AIR75584.1;YP_009093186.1;AIR75443.1;ADB27516.1;EJK55847.1;EJK54216.1;ABK20765.1;EJK52340.1;YP_874542.1;YP_004072562.1;AIR75859.1	RecName: Full=Photosystem II D2 protein; Short=PSII D2 protein; AltName: Full=Photosystem Q(A) protein	0.479278	14	0.0001	0.00219734	0.823762	14	0.0311969	0.200628	0.369037	14	0.00019998	0.00360164	0.644685	14	0.00509949	0.0481114	0.910814	14	0.19768	0.509613	0.579215	14	0.0001	0.0016362	0.941904	13	0.248375	0.623359	0.565795	14	0.00019998	0.00262893	1.22595	14	0.0341966	0.197812	1.26258	14	0.0279972
98	XP_002288703.1	570	36249	AHQVVEDGYEFFAR;ICGDVHGQYYDLLR;QSLETICLLLAYK;DLLISQPMLLELEAPIK;IFCTHGGLSPELTSLDQVK	1;1;1;1;1	5	14	272656;272659;272660;272662;272666;280472;280476;304292;304293;304294;341171;342328;351300;351301	EED94139.1	serine threonine protein phosphatase [Thalassiosira pseudonana CCMP1335]	1.0672	11	0.377662	0.701595	1.11389	14	0.210479	0.584412	1.50945	14	0.00309969	0.0284824	1.27742	13	0.0001	0.00261133	1.09543	14	0.187781	0.494777	1.45423	13	0.00039996	0.00486438	1.13185	14	0.00949905	0.0930287	1.42793	14	0.00019998	0.00262893	0.821775	12	0.0260974	0.161894	0.753078	11	0.00029997
99	XP_002289207.1	1243	104729	TPNEYIR;MSALSGGQK;VVIAAAMWNQPHILILDEPTNYLDR;YGLLGGNDSGK;FPQPGPIEGVK;QSAVIINNMSK;KYGLLGGNDSGK;AKPDHAVSTLSGGWR;QLGNALPEIVPEVTACMWDTK	0;0;1;1;0;1;1;0;1	5	14	67248;151976;151977;151990;151991;157060;189419;365390;210430;210431;210437;231769;231772;231774;231775;231776;231785;240151;240152;243826;243829;298269;308002;308005;308006;308007;361066;361443;361444;361446	EED92744.1	ABC cassette-containing protein, partial [Thalassiosira pseudonana CCMP1335]	0.616667	14	0.0001	0.00219734	1.01239	14	0.79772	0.92206	0.572923	14	0.00019998	0.00360164	0.915272	13	0.124388	0.410525	0.651157	14	0.0001	0.00219734	0.736203	13	0.0001	0.0016362	0.897408	14	0.0268973	0.183595	0.970772	14	0.59994	0.83184	0.800906	14	0.0119988	0.0926431	0.589488	12	0.0001
100	XP_002289867.1	158	55394.8	SGFFADGAK;AIIVMSESGNTAR;NEVDYIAASFVR;DIDDIVNWGIK;NMNLPGVVVDLPTLTEK	1;1;1;1;0	4	14	158555;158556;158560;205258;205259;205270;205286;210116;210117;210120;210121;210127;257802;257818;335153	EED93404.1	pyruvate kinase [Thalassiosira pseudonana CCMP1335]	0.995522	14	0.948205	0.984222	1.21271	14	0.0114988	0.103089	0.840624	14	0.165883	0.456666	1.05223	14	0.629537	0.885578	0.931073	13	0.0843916	0.310089	1.21458	14	0.0651935	0.223521	0.984711	14	0.70283	0.901679	1.33864	14	0.00389961	0.0292633	1.02249	14	0.807119	0.95334	0.932829	14	0.458054
101	XP_002294945.1	277	46028.7	TPLGWPK;FNALPYPADK;VLAEYVWVDAK;RPSSNADPYLVTGK;HQEHIAVYGEGNELR	1;1;1;0;1	4	14	126793;223907;223908;223909;223910;223921;258923;258925;258926;258927;258928;258931;297010;297013;297014;297015;297016;297017;327312;327313	EED87725.1	hypothetical protein THAPSDRAFT_26051 [Thalassiosira pseudonana CCMP1335]	0.753447	13	0.0001	0.00219734	0.860639	14	0.019898	0.144582	0.999247	14	0.988201	0.995943	1.1194	11	0.00269973	0.0304057	1.06565	12	0.0428957	0.199222	1.48451	13	0.00039996	0.00486438	0.917592	14	0.0252975	0.175331	1.2827	14	0.00079992	0.00809357	0.543958	13	0.0001	0.0035271	0.632947	14	0.00019998
102	XP_002295282.1	1299	45405.9	GYQPNVGSTK;KGYQPNVGSTK;SMGSTVSAVLATAFK;VVVTGMGITSCLGNTLEDVK;VCAILGQGGTSIPDIVETVEAVK;AMSNSFGFGGTNCALVFDKYEE	1;1;0;1;1;0	4	14	202982;202983;202989;202992;293304;293778;293780;350913;350915;350916;350917;350918;351628;351629;360656;360659;362532;362847	EED87348.1	predicted protein [Thalassiosira pseudonana CCMP1335]	1.46864	13	0.0001	0.00219734	1.32658	13	0.00019998	0.00621317	1.19474	14	0.0788921	0.280246	1.1644	14	0.121088	0.403328	1.21058	13	0.00319968	0.0292681	1.25971	13	0.00059994	0.00638989	1.00469	14	0.926707	0.982686	1.03122	14	0.706329	0.893956	1.15286	13	0.009999	0.0813946	1.37375	12	0.0001
103	BAH30220.1	366	48729.4	SVVAAGLAK;TLESITLK;LCDQVSDAVLDACLK;MEFDARPGALAR;YNVTAAYCHFGR;FIIGGPQGDAGLTGR;DDCHVHLNPSGK;DGSLWWLRPDGK;IHTVLISTQHAEPGK;EIGFSSFVDDLSSVESK;KDGSLWWLRPDGK;IIIDTYGGWGAHGGGAFSGK;TQVTIAYDQLADGSVVPTK;DNMVMVFGEISTAANLDYEK	1;1;1;1;1;0;1;0;0;0;0;0;0;0	6	13	132252;132256;160323;160324;160325;169825;197484;197485;197487;197488;228253;228254;228367;228368;228370;228375;228378;228382;228384;228390;275574;284871;314044;314046;314049;314050;314051;314053;314054;335608;336860;343883;343886;346445;346446;346447;346448;346451;359337;357240	-	methionine S-adenosyl transferase, partial [Skeletonema costatum]	1.00022	27	0.9958	0.999555	0.706644	26	0.0001	0.00353298	1.21473	27	0.0146985	0.0912829	0.823431	26	0.0001	0.00261133	1.19159	27	0.00019998	0.00371509	1.50824	25	0.0001	0.0016362	1.22599	27	0.00089991	0.017437	1.53952	26	0.0001	0.00166743	0.585402	25	0.0001	0.0035271	0.611152	26	0.0001
104	CAA04403.1	383	20937.6	GILEHFSS;LAMLAAAGFLAQEAVDGK	1;1	2	13	66448;66453;66454;66455;66466;66467;66470;66473;66487;329557;331097;331102;331103	XP_002295184.1;EED87488.1;XP_002295258.1;EED87562.1;CAA04406.1;CAA04404.1;CAA04402.1;CAA04405.1;CAA04407.1	fucoxanthin chlorophyll a/c binding protein, partial [Cyclotella cryptica]	0.730839	13	0.00369963	0.0337286	0.901564	11	0.00759924	0.0773663	0.573659	12	0.00029997	0.00478094	0.673012	11	0.0001	0.00261133	1.18568	12	0.0743926	0.291183	0.440101	13	0.0001	0.0016362	0.960032	13	0.678732	0.892355	0.355451	12	0.0001	0.00166743	1.10345	13	0.149585	0.475448	1.2237	10	0.00339966
105	EED90545.1	298	58239.1	EAYPGDVFYLHSR;QMSLLLR;LELAQYR;AVDALIPIGR;EVAAFAK;VGSAAQYK;TGAIVDVPVGPELLGR;YAETGSVISVGDGIAR;TAIAIDTIINQK;ESVSEPMLTGLK;HAVIFYDDLSK;FGSDLDAATQQQLNR;STIAQLVGQLDDK;DPLACIYVGVGQK;RTGAIVDVPVGPELLGR;KDPLACIYVGVGQK;VYGLANVQAGEMVVFACGLR	0;0;0;0;0;0;1;0;0;0;0;0;1;1;1;1;0	5	13	17871;250028;250036;250041;250042;250044;250050;250052;250053;250054;250055;250059;250061;250066;304524;304525;304530;304532;304540;304543;304544;304545;304546;304547;304548;304549;304551;304552;336512;59606;59608;59609;59613;63395;67351;67353;67354;103719;103720;103730;103731;103732;103733;103734;103735;103736;108094;108104;134602;134616;134617;134618;258064;258065;258066;258067;258069;258392;25…	XP_002291694.1	mitochondrial ATPase, inner membrane [Thalassiosira pseudonana CCMP1335]	1.21587	12	0.00409959	0.0356882	1.21788	13	0.00519948	0.0593004	1.12083	12	0.0478952	0.202012	1.15562	13	0.00139986	0.0186855	0.93316	12	0.147185	0.428769	1.04946	13	0.336966	0.618918	1.01785	12	0.79522	0.954053	1.22727	8	0.00209979	0.0183579	1.21279	13	0.00379962	0.04168	1.08866	13	0.261374
106	EED93025.1	1163	39995.4	VGELFGGSMR;MAPTDMKPTR;SGSCPHGGWGMGFDR;DVVPFPVYYGHCPY	1;1;1;1	4	13	111653;111654;116406;226753;230520;230521;230522;230526;230532;264195;281115;323225;323230	XP_002289488.1	predicted protein [Thalassiosira pseudonana CCMP1335]	1.06273	11	0.178582	0.461604	0.919018	13	0.0938906	0.393314	0.9796	13	0.844616	0.939443	0.858284	13	0.049995	0.238968	0.792627	12	0.00139986	0.0154758	1.22605	11	0.00029997	0.0038845	0.943307	13	0.107789	0.425957	1.43514	13	0.00039996	0.00461749	0.806239	11	0.00039996	0.00827044	0.760938	12	0.00149985
107	EJK52349.1	509	32316	FYESNPGLSSR;EIAALLLIDK;MADILFQLGYVK;DDLVGQYIGHTAPK;LLNLLDEELVGLAPVK;MMLEEQQYQLTPQAEIALTDYITR	0;0;0;0;0;1	1	13	175309;175311;175312;175313;175316;214938;214939;214940;214941;214942;282107;282108;282111;282112;282114;298422;298426;298430;298431;298432;298433;298435;325776;365026;365258;365259;365260;365261;365262;365264;365269;365481;365482;365484;365486;367766	YP_004072549.1;EJK55849.1;ADB27503.1	hypothetical protein THAOC_28396 [Thalassiosira oceanica]	0.473023	13	0.0001	0.00219734	1.094	13	0.109489	0.428372	0.328576	13	0.0001	0.00211861	0.81429	13	0.00359964	0.0381562	1.03424	13	0.618538	0.877821	0.71642	13	0.00209979	0.0175796	0.79926	13	0.00019998	0.00621317	0.522361	13	0.0001	0.00166743	1.36021	13	0.0079992	0.0701979	1.85003	13	0.0001
108	EJK63068.1	243	71351	FELTGIPPAPR;IINEPTAAAIAYGMDK;DAGTISGMK;VMQYFIK;EVENIANPIMR;ITPSYVAFMDNGDR;NGLESYLYNLK;VQSLISEYFGGK;NAVVTVPAYFNDAQR;YAPEEVSAMILQK;QKEVENIANPIMR;NQATINPENTVFDVK	0;0;0;0;0;1;0;1;0;1;0;0	3	13	27415;27423;156706;156711;156712;156713;156714;156727;156730;156732;156733;156734;156735;156736;156737;156739;156742;156743;156744;156747;156750;156751;156752;156753;156754;156755;156756;156757;156758;156759;156760;156761;156763;156803;54715;319468;319471;319472;319473;319476;319483;321216;321218;321221;321222;321226;321229;321231;152304;152307;152311;152312;152313;167725;172778;184595;184601;184…	-	hypothetical protein THAOC_16293 [Thalassiosira oceanica]	1.14355	12	0.247975	0.557431	0.92115	12	0.0712929	0.334557	0.943975	13	0.745625	0.909188	0.872829	13	0.00159984	0.0201602	0.741668	12	0.0001	0.00219734	0.83913	9	0.00249975	0.0197349	0.774578	11	0.0001	0.00367718	0.79083	12	0.00089991	0.00895435	1.01983	13	0.841416	0.961765	1.1226	12	0.129887
109	EJK69871.1	1525	20838.3	GHSLESIMASIEAR;LSSPAPGMK;KPDFDAYIEPQK;AFADYVIEVLPTDLDK	0;1;1;1	3	13	71723;238132;238137;238141;238142;238161;238162;241896;241898;154818;159936;327583;327584;327587;327588;327590;327591;327592;327595;327596;327597;332599	-	hypothetical protein THAOC_08831 [Thalassiosira oceanica]	1.73093	13	0.0001	0.00219734	1.5916	12	0.0001	0.00353298	2.54741	13	0.0001	0.00211861	2.31584	13	0.0001	0.00261133	2.23069	13	0.0001	0.00219734	1.50667	13	0.00039996	0.00486438	1.16754	13	0.10449	0.418423	0.785252	13	0.00089991	0.00895435	1.32882	11	0.0001	0.0035271	2.70386	13	0.0001
110	EJK71308.1	81	36314.9	VINDEFGIK;AGIALTDNFVK;LVSWYDNEAGYSNR;VLDLISHMEAQK;AACYNIIPSSTGAAK;EGLMTTVHAVTATQQTVDGPSQK	0;1;0;1;0;1	3	13	198875;198876;198888;227089;227090;227093;227094;273802;273803;273805;273806;276527;276528;276554;276555;276557;276566;300082;300083;300087;300088;300092;361675;361676;361955	-	hypothetical protein THAOC_07275 [Thalassiosira oceanica]	1.01206	17	0.834517	0.954187	1.27637	17	0.00069993	0.014666	1.01729	17	0.780522	0.921018	1.31922	17	0.00019998	0.00462005	0.900032	17	0.00169983	0.0177057	1.02787	17	0.471453	0.734084	0.966388	16	0.373863	0.753835	1.11091	16	0.119388	0.351911	0.796736	17	0.0019998	0.0270499	0.760263	17	0.00279972
111	XP_002287097.1	965	34302.5	YVEFNLVYDR;HDPEFYPK;IESILMSLPETAR;AGVNLSVVYGSMPQEALQAATER	1;1;1;1	4	13	193216;193218;263864;198212;228581;232435;232436;350591;350592;350602;351340;351342;351343	EED96738.1;EJK71933.1;EJK64385.1	coproporphyrinogen III oxidase, chloroplast targeted [Thalassiosira pseudonana CCMP1335]	0.757953	13	0.039996	0.183391	0.925493	13	0.243776	0.620232	0.731292	13	0.0645935	0.247374	0.899072	13	0.0737926	0.301254	1.143	11	0.00179982	0.018533	1.21859	13	0.0109989	0.0596326	1.04148	11	0.338666	0.719666	1.16894	13	0.0346965	0.148782	0.924218	13	0.227377	0.576785	0.957439	13	0.616938
112	XP_002288699.1	195	105683	FCDAMLSIR;LCGSDLCVPK;STEVAILNANYMAAR;LAPPSSWGADIAVGSAQR;SAHGTNPASAAMAGMK;GMTAAQVQEGAASVGANVR;SYIGMGYYDTIVPNVILR;DLALNHSMISLGSCTMK;FFVSKDVHPQTISLIQTR	1;0;1;1;0;1;0;0;1	5	13	129829;129830;134786;226985;226993;264257;264258;267391;292602;296429;296430;296433;298211;298213;298214;300795;300799;329030;330477;330480;337936;351993	EED94135.1	glycine decarboxylase p-protein [Thalassiosira pseudonana CCMP1335]	1.03763	13	0.594541	0.84559	1.13751	13	0.0171983	0.134161	0.847383	13	0.0691931	0.255945	0.903296	12	0.0980902	0.353517	0.964062	12	0.419858	0.757771	1.21582	13	0.155384	0.395604	0.937867	13	0.277772	0.656884	1.14089	13	0.274873	0.572307	0.962969	13	0.69783	0.919953	1.02433	13	0.79592
113	YP_009093163.1	701	13460.1	MVQEALSK;KQIEDAGGK	1;0	1	13	160630;160631;160632;160635;160644;160646;160655;160656;160657;160659;160666;165610;165615;250317;250318;250322	AIR75836.1	ribosomal protein L12 (chloroplast) [Roundia cardiophora]	1.30607	13	0.00029997	0.00505183	1.1794	13	0.00449955	0.0551577	1.41063	10	0.0001	0.00211861	1.27523	12	0.0001	0.00261133	1.6066	11	0.0001	0.00219734	1.46133	13	0.00019998	0.00281222	1.04315	10	0.0814919	0.360807	0.976221	13	0.425657	0.721174	0.368353	11	0.0001	0.0035271	0.564865	11	0.0001
114	ABK20727.1	326	19998	DFLGSILQER;ALINETIQK;QQIISLVLK;QLSQAHVVISEIR	1;1;1;1	4	12	150402;150403;197591;197595;197596;197597;197598;197599;200710;233491;233493;233498	YP_874504.1;sp|A0T0P2.1|ATPF_THAPS;EED86188.1;XP_002297548.1	ATP synthase CF0 B chain subunit I (chloroplast) [Thalassiosira pseudonana]	0.495415	12	0.0001	0.00219734	0.68518	12	0.0019998	0.0324652	0.299653	12	0.00019998	0.00360164	0.419698	12	0.00039996	0.00750758	1.19745	11	0.00379962	0.0335633	0.365371	12	0.0001	0.0016362	0.905868	12	0.414759	0.767531	0.265373	12	0.0001	0.00166743	1.24957	11	0.00879912	0.0753791	1.79703	12	0.00049995
115	ACI65072.1	1118	52376.9	LIGWGEIK;VGDEIEVRPGIVTK;GEILMVNIGSTGTGGK;ISLTQPVCTQEGEK;QATINVGTIGHVAHGK;YNVDLVCEYLVHK;FVVGTVADSAPILPISAVLK;ISSLYAESNDLQYAVPGGLIGVGTR	1;1;1;1;1;1;1;1	8	12	163786;298155;298160;298161;298162;301678;308983;308987;310584;316427;345975;358274	XP_002296355.1	translation initiation factor eIF-2, gamma subunit [Thalassiosira pseudonana CCMP1335]	0.970277	12	0.757724	0.91516	0.81885	10	0.0001	0.00353298	1.01521	12	0.854115	0.941984	0.774056	12	0.00249975	0.0288753	0.71513	12	0.00069993	0.00941249	0.864415	12	0.0777922	0.250943	0.794599	12	0.00529947	0.0585868	0.976107	10	0.69673	0.891987	0.741513	12	0.00019998	0.00553483	0.712318	10	0.0001
116	BAG30808.1	923	48332	QGGISAR;IAVMDSNR;GGFEAAIAK;GVTIQCNTK;AGPGDSVGLSIK;LPISNIYNIK;VQPGDIIYVQK;YHYTIVDAPGHK;FNEIKEEFVK;NMITGSATADVGLLLVPAEK	1;0;0;0;1;0;0;0;0;0	2	12	26121;70389;70390;147364;147373;147391;147392;147402;147403;147406;147411;147414;147415;147416;195158;195159;195160;195161;195162;195163;195170;215408;215410;215411;215412;215413;215420;215424;215425;215427;215430;215431;233256;233265;233266;233272;233273;233274;233277;233279;233280;233281;233283;233284;233287;233289;233290;233291;233293;252374;279831;279840;279843;279845;279851;279853;279856;279…	-	elongation factor-like, partial [Skeletonema costatum]	1.08681	12	0.0949905	0.3174	0.981224	12	0.753625	0.912141	0.96206	12	0.781622	0.921018	0.874876	12	0.420758	0.76432	0.637923	12	0.0001	0.00219734	1.14442	12	0.60114	0.815747	0.68793	12	0.0001	0.00367718	1.16042	12	0.49715	0.770342	0.987513	12	0.841016	0.961765	0.951744	12	0.438456
117	BAH30219.1	365	51057.4	FIIGGPQGDAGLTGR;DGSLWWLRPDGK;FFSWEDPVDLSK;SFLFSSESVNEGHPDK;KDGSLWWLRPDGK;IIIDTYGGWGAHGGGAFSGK;DNMVMVFGEISTAANLDYEK	0;0;1;1;0;0;0	2	12	228367;228368;228370;228375;228378;228382;228384;228390;284871;291097;291103;291104;291105;291106;291110;291111;291112;291113;291115;291117;329925;336860;343883;343886;357240	-	methionine S-adenosyl transferase [Detonula confervacea]	1.24462	11	0.0001	0.00219734	0.709596	12	0.00659934	0.0695439	1.3886	12	0.00129987	0.0146317	0.746558	12	0.00249975	0.0288753	1.3006	12	0.0001	0.00219734	1.96879	12	0.0001	0.0016362	1.13274	12	0.00139986	0.0244908	1.83117	11	0.0001	0.00166743	0.603336	12	0.00019998	0.00553483	0.667636	12	0.00119988
118	EED90159.1	997	32380.4	TDGRPLNAR;SETIQGGALR;TFNAVIGTPR;IELLQGPNNNK;NIGQLEFPLDAVVRPDR;SLDEIWMNSAPVIVQGGSLR	0;0;0;0;0;1	1	12	96453;105743;118632;118635;118636;118641;248049;248051;248053;248055;248056;248057;248061;314569;314570;314572;314573;314576;314577;314580;314582;337231;337232;337233;337234;337235;337238;337239;337248;337250;337251;337252;338337	XP_002292184.1	predicted protein [Thalassiosira pseudonana CCMP1335]	1.28786	12	0.0375962	0.175061	0.948853	12	0.336566	0.685302	1.09435	12	0.377862	0.695153	0.822582	12	0.0089991	0.0727192	1.12315	12	0.124888	0.387345	1.14028	12	0.149285	0.387195	0.9452	11	0.125887	0.45881	0.86787	12	0.115688	0.347024	1.39963	12	0.0001	0.0035271	1.79024	12	0.0001
119	EED91510.1	1596	13435.2	IEQLLI;IKIEQLLI;NVPYVFVPSK	1;1;1	3	12	32560;32578;32579;32580;32581;181034;181035;181036;227299;227302;227303;227310	XP_002291403.1	L7Ae, ribosomal protein 7Ae 60S large ribosomal subunit [Thalassiosira pseudonana CCMP1335]	1.99291	12	0.0001	0.00219734	1.32477	12	0.00109989	0.020433	1.763	12	0.0001	0.00211861	1.20565	12	0.00209979	0.0253948	1.15969	12	0.0112989	0.0735038	1.77443	12	0.0001	0.0016362	1.21864	12	0.00049995	0.0111223	2.02765	11	0.0001	0.00166743	0.828516	12	0.00039996	0.00827044	0.773693	12	0.0001
120	EED92063.1	110	47380.3	QAGWGVMTSHR;VNQIGSISESIDAVK;AGAAANNLPLYAHYAK;EGCELIMEALKK;FVASVPSGASTGAYEACELR;VKGEDKYDLDFK;SGETEDTYIADLAVGLCTGQIK	1;0;1;1;1;1;1	6	12	166601;166607;305391;305392;305393;305394;305395;305404;305405;315606;315608;315609;315610;324645;328766;328767;349913;349521;360237	XP_002290311.1	enolase [Thalassiosira pseudonana CCMP1335]	1.20228	12	0.0412959	0.187444	0.875569	12	0.151485	0.51215	1.35139	11	0.00069993	0.0090041	1.12684	11	0.10279	0.366039	1.43038	12	0.00019998	0.00371509	1.43566	9	0.0001	0.0016362	1.25327	11	0.00119988	0.0222906	1.29761	10	0.00169983	0.0157804	0.670744	12	0.00129987	0.0201592	0.70631	12	0.0105989
121	EED92326.1	82	65761.8	AYADVFTK;FFVGGNWK;VINDEFGIK;VPTANVSVVDLTAR;LVSWYDNEAGYSQR;AACYNIIPSSTGAAK	1;1;0;1;1;0	4	12	163344;163345;243303;176088;198875;198876;198888;224449;224450;224458;276383;276385;276392;320534;320535;300082;300083;300087;300088;300092	XP_002290574.1	triosephosphate isomerase/glyceraldehyde-3-phosphate dehydrogenase precursor [Thalassiosira pseudonana CCMP1335]	0.994712	12	0.918408	0.980173	1.36216	12	0.00259974	0.0374779	0.897342	12	0.00869913	0.0614397	1.2251	9	0.00169983	0.0212715	0.723909	10	0.0001	0.00219734	0.940675	12	0.392461	0.67279	0.933473	12	0.090091	0.383792	1.20448	12	0.0250975	0.118326	1.10225	11	0.00749925	0.0674558	0.833708	12	0.00229977
122	EJK69743.1	256	44796.4	NICTEAGLFAIR;VALDMTTLTIMR;GVLLYGPPGTGK;RGDIDFESVVK;EVIELPLTNPELFIR	1;1;0;1;1	4	12	205277;205290;205347;205348;209386;209393;209394;209402;209403;213400;229298;229300;229303;229304;229306;253344;292660	EED89574.1;XP_002293113.1	hypothetical protein THAOC_08972 [Thalassiosira oceanica]	0.878132	12	0.049995	0.215014	1.0108	12	0.864814	0.949593	0.696742	12	0.00109989	0.0129471	0.818469	12	0.0089991	0.0727192	0.838675	12	0.00259974	0.0246565	0.842009	12	0.0615938	0.218246	0.890082	11	0.0001	0.00367718	0.958187	9	0.335466	0.645374	1.21884	10	0.00019998	0.00553483	1.04929	12	0.59664
123	EJK74797.1	1326	48911.2	MTVTLTCDHR;GVTVSALLAK;QIYGADAALFLK;AVSNNMVATLDCPVFR	0;0;1;1	2	12	167858;177459;177460;262458;262459;262460;262461;262462;262465;294372;294375;294377;294378;297087;297088	-	hypothetical protein THAOC_03499 [Thalassiosira oceanica]	1.46074	15	0.00019998	0.00367718	1.23919	15	0.0001	0.00353298	1.39509	13	0.0001	0.00211861	1.08688	15	0.224978	0.585786	1.04119	15	0.523748	0.826912	1.02623	12	0.455254	0.721989	0.994118	15	0.90371	0.979943	1.02518	15	0.60024	0.83184	1.23695	15	0.00259974	0.0313888	1.3535	14	0.00029997
124	XP_002290667.1	71	97762.4	HFNFAMSK;GVLLTGPSGCGK;GVLFYGPPGCGK;VINQILTEVDGVGAR;LDQLIYIPLPDLESR;GPELLTQWFGESEANVR;KAPLDPSIDIEVLAR;AASPCILMFDEMDSIAK	1;1;0;1;0;1;1;1	6	12	189162;226383;226386;250627;250631;250632;250637;256250;292957;313664;313672;313675;313676;314778;314779;339385;339386	EED92419.1	cell division cycle protein 48 [Thalassiosira pseudonana CCMP1335]	0.97997	11	0.578542	0.837291	0.943492	12	0.371363	0.702199	0.838965	12	0.0176982	0.101836	0.864856	12	0.0688931	0.291421	0.946842	12	0.472953	0.790864	0.848668	11	0.00139986	0.013332	0.934638	12	0.326767	0.710091	0.866175	12	0.059694	0.222126	0.94591	12	0.594941	0.882356	0.9663	12	0.69873
125	XP_002291793.1	915	41232	VTVVDWK;LYAEEMALAYGR;KLEVAVK;SFTYIDDCVEGVLR	1;0;1;1	3	12	141842;210915;210916;214779;214788;213064;213065;273816;273817;273818;273819;273820;273821;273822;273828;273830	EED90644.1	dual function enzyme: UDP-glucose 4-epimerase [Thalassiosira pseudonana CCMP1335]	1.13522	12	0.159584	0.43971	1.04836	12	0.412059	0.725836	1.26993	12	0.111989	0.35761	1.1815	12	0.0765923	0.308768	1.25884	12	0.0222978	0.121759	1.30497	12	0.0293971	0.127505	1.14832	12	0.131087	0.466835	1.18508	12	0.177782	0.443471	0.754607	12	0.0029997	0.035503	0.854876	11	0.059694
126	XP_002294274.1	415	76079.1	TPVDGLLR;VLCLESHIK;TVDEFVTVPFLR;AVVSNATPFDTVK;MIFDILEETMPVK;YSFEVGPSIFEGLDRPSLNPLR	1;1;1;1;1;1	6	12	61915;61922;214919;219849;219854;219857;219858;219859;269955;306200;355135;355136	EED88629.1	hypothetical protein THAPSDRAFT_10233 [Thalassiosira pseudonana CCMP1335]	1.05814	11	0.305469	0.622688	1.01841	12	0.723328	0.902269	0.940401	12	0.533347	0.811282	0.954797	12	0.453555	0.788905	1.56737	11	0.0001	0.00219734	1.1298	12	0.0290971	0.126509	0.898866	9	0.00159984	0.0264487	0.662764	12	0.00069993	0.00732892	0.916525	12	0.233677	0.584367	1.48444	12	0.00239976
127	EED86160.1	48	18039.2	SADIYPR;TNPNVGLDPEALSLATPR;NPTTYDGLESIAEIHPSIK	0;1;1	2	11	133926;305482;305485;305486;305487;305488;305489;350519;350520;350521;350527;361467	XP_002297520.1;ABK20717.1;sp|A0T0N2.1|CY550_THAPS;YP_874494.1;EJK50467.1;ADB27528.1;YP_004072574.1;EJK54087.1	cytochrome c550, PsbV [Thalassiosira pseudonana CCMP1335]	1.37296	9	0.00019998	0.00367718	1.5454	11	0.00029997	0.00858009	1.68788	11	0.00039996	0.00610447	2.13762	11	0.0001	0.00261133	3.26872	11	0.0001	0.00219734	4.3436	11	0.0001	0.0016362	1.00203	10	0.947005	0.985292	1.53386	10	0.00029997	0.00377794	0.433239	11	0.00039996	0.00827044	1.29618	11	0.0307969
128	EED87497.1	1179	51266.8	GFTYGGEMVR;EGLLLVAAGPSVVR;ALGGGVPIGAMMAK;AFFCNSGAESNEAAIK	1;1;1;1	4	11	131028;131031;135930;209501;209502;209503;209504;255013;323576;323583;323584	XP_002295193.1	n-acetylornithine aminotransferase [Thalassiosira pseudonana CCMP1335]	1.10476	11	0.29837	0.613969	0.964208	11	0.434957	0.742909	1.2176	11	0.122688	0.379967	1.00913	10	0.79632	0.935443	1.52417	11	0.00069993	0.00941249	1.41409	11	0.00549945	0.0353536	0.971585	10	0.451355	0.793504	0.936799	11	0.362864	0.666102	0.911346	11	0.325367	0.700638	1.34182	11	0.00129987
129	EED87666.1	987	26043.1	GGVPGAYPK;VEGSVPLLK	1;1	2	11	141551;141566;141577;141579;141580;141581;141582;227317;227320;171943;171959	XP_002294886.1	predicted protein [Thalassiosira pseudonana CCMP1335]	0.789754	11	0.00019998	0.00367718	0.703014	11	0.0001	0.00353298	0.596302	11	0.0009999	0.011926	0.533728	11	0.00059994	0.010199	0.959665	10	0.276072	0.627342	0.44718	11	0.0001	0.0016362	1.0218	11	0.79712	0.95439	0.473573	11	0.00039996	0.00461749	1.66262	11	0.0009999	0.0165029	1.4722	10	0.00639936
130	EED91184.1	558	15339.3	QMIVDIIHPGR;SELQEVVGGMHK	1;1	2	11	182498;182499;187336;187337;187338;187339;187346;263106;263120;266258;266271	XP_002291077.1	RS24, ribosomal protein 24 40S small ribosomal subunit [Thalassiosira pseudonana CCMP1335]	0.650123	11	0.00029997	0.00505183	0.711426	10	0.0001	0.00353298	0.621021	11	0.00139986	0.0154672	0.676799	10	0.0001	0.00261133	0.966417	11	0.666433	0.897543	0.563496	11	0.00049995	0.00573191	1.04998	11	0.206679	0.57829	0.618945	11	0.00049995	0.00552399	0.813292	10	0.0184982	0.129993	0.730215	10	0.0001
131	EED91781.1	526	63442.4	VAALGGGIAR;GVLDVVAIR;AGAAILMK;LVQEVASK;YEDALNSVQSAR;GYISPYFVK;NYGAPEIVNDGVTIAR;IDNVNEIVPLLEQLVK	1;1;1;1;1;1;1;1	8	11	65438;80051;80052;80057;119648;150533;202235;202236;208763;276685;334902	XP_002291674.1	predicted protein [Thalassiosira pseudonana CCMP1335]	0.930938	10	0.291171	0.611527	0.970953	11	0.648835	0.876462	0.815205	11	0.0422958	0.184878	0.812043	11	0.0337966	0.182887	0.887813	11	0.0181982	0.105784	1.01889	11	0.783922	0.921023	0.930132	9	0.0133987	0.115523	1.11099	10	0.0142986	0.0775654	1.17728	10	0.00169983	0.0248617	1.10908	10	0.157884
132	EED92064.1	635	106672	VLPFDAK;AVFGEVYPDPVR;TLVELMGDTFPELR;EADGSLRPLPAQHVDTGMGFER;DNFWEMGATGPCGPCTEIHYDR	1;1;1;1;1	5	11	124006;201316;201317;201322;263632;263633;266892;266894;266895;350249;359282	XP_002290312.1	alanine-trna ligase [Thalassiosira pseudonana CCMP1335]	0.864323	11	0.0856914	0.298113	0.937312	10	0.333467	0.685302	0.811292	8	0.00349965	0.0316727	1.03153	9	0.448655	0.787157	1.08716	10	0.0768923	0.296702	1.21232	11	0.0623938	0.218925	1.0942	11	0.0250975	0.174617	1.28998	11	0.0156984	0.0838958	0.736821	10	0.0245975	0.157477	0.639395	9	0.0009999
133	EED95029.1	495	56336.2	AFVALLEK;ENVALDIGGYR;GWFADAVSHLK;LDVTTYSWQK;DIDICHWESFGK;DRDICFTFNGTTSGVR;IWCGATVETADVEALMPWLK	1;0;1;0;1;1;0	4	11	155852;155853;155857;155859;159510;159511;159517;159522;159523;240632;240637;246066;246071;246072;248266;297258;297259;297262;302819;358751	XP_002287586.1	predicted protein [Thalassiosira pseudonana CCMP1335]	1.08257	9	0.0622938	0.244561	0.924583	9	0.0469953	0.263818	1.39962	11	0.00489951	0.0402923	1.09684	11	0.214679	0.570576	1.18691	11	0.00379962	0.0335633	1.24574	11	0.00249975	0.0197349	1.18389	11	0.00579942	0.0625782	1.25602	11	0.00659934	0.0422968	0.632979	11	0.00049995	0.0097762	0.621379	11	0.00039996
134	EJK52520.1	1043	41610.6	GLVDVAVAPK;LQAVETAESPINR;DALYEEVNKPSLR	1;1;1	3	11	180777;180779;220987;220988;220995;221024;301660;301661;301662;301673;301674	XP_002292286.1;EED90261.1	hypothetical protein THAOC_28191 [Thalassiosira oceanica]	0.961367	11	0.676232	0.879834	0.959608	11	0.508449	0.79842	1.08458	11	0.446855	0.745863	1.08526	11	0.229177	0.589756	1.15593	10	0.00249975	0.0240885	1.21008	10	0.149785	0.387932	1.05185	11	0.467153	0.80909	1.05434	10	0.712529	0.89676	0.869637	11	0.112989	0.41064	1.03796	10	0.687431
135	EJK58406.1	1337	109524	GIGPAYASK;LDVLTGLAEVK;LVDMLSQEYDVCAR;VAGGSNAGHTIVVDGK	0;1;1;1	3	11	147367;147371;147380;147381;229171;229172;229173;278652;278653;278655;278656;278657;278658;293153;293161	-	hypothetical protein THAOC_21471 [Thalassiosira oceanica]	0.900968	11	0.182782	0.465216	0.929273	11	0.329267	0.685302	0.748384	11	0.00239976	0.0240109	0.786116	11	0.0251975	0.150351	0.772253	11	0.00329967	0.0298794	0.813782	11	0.0153985	0.0789665	0.87332	11	0.0623938	0.31059	0.960767	10	0.522848	0.790637	1.0772	11	0.39846	0.759354	0.92052	10	0.467553
136	EJK77104.1	1268	73316.2	VHGGLLGVR;LTPSALAYLR;DGMMVGVGAGQQSR;DMIVASICVK;EATGLAAASSFK;NVELLSTGGTAK;ATGVTISSDAFFPFR;VYKPEFPLK;GAAFEQCIENIDIGGPSMLR	0;0;0;0;0;0;1;1;1	3	11	71125;127401;127416;127436;212301;223926;223928;227771;227941;236687;236695;262688;262689;284068;337625;337626;337627;338767;338768;338769;338770;338771	-	hypothetical protein THAOC_01087 [Thalassiosira oceanica]	1.25138	10	0.00589941	0.044667	1.13568	11	0.0820918	0.362572	1.57319	10	0.00149985	0.0163711	1.37178	11	0.0118988	0.0908545	1.13295	9	0.0117988	0.076206	1.31106	11	0.0378962	0.15398	1.02141	11	0.79882	0.954558	1.34397	9	0.0001	0.00166743	0.831528	11	0.256474	0.616841	0.817587	11	0.0659934
137	XP_002287767.1	1469	24846.7	HLTGEFEK;LILVGDGGVGK;NLQYYDISAK;FNVWDTAGQEK;VCENIPIVLTGNK	1;1;1;1;1	5	11	177940;197104;197126;242442;242452;259218;259220;259226;259265;289111;289112	EED95210.1;EJK76514.1	ran-type small G protein [Thalassiosira pseudonana CCMP1335]	1.33709	11	0.00249975	0.0254494	1.29306	11	0.00029997	0.00858009	1.2539	11	0.00589941	0.0461949	1.23914	11	0.00289971	0.0318614	0.758879	11	0.00059994	0.00864873	1.35264	11	0.00059994	0.00638989	0.758342	10	0.0001	0.00367718	1.41196	11	0.00069993	0.00732892	0.984298	11	0.79682	0.95303	0.994683	10	0.928107
138	XP_002287959.1	1273	21056.4	VWLGHMDVPGLAMSR;IDTEFSGTTLSMAIIR;SLGDAVAHTAGVISDPEFTEK	1;1;1	3	11	272909;272910;272911;272912;288180;288181;290652;290653;290666;353256;353257	EED95402.1;EJK59682.1	predicted protein, partial [Thalassiosira pseudonana CCMP1335]	1.01782	11	0.860014	0.962201	1.14775	10	0.0181982	0.13721	1.06304	11	0.413859	0.721888	1.15201	11	0.0624938	0.273981	0.924175	10	0.270373	0.619863	1.17374	8	0.0112989	0.0607103	0.943309	11	0.209879	0.57829	1.04889	11	0.430157	0.725045	0.994588	11	0.970703	0.994112	1.04633	11	0.750925
139	XP_002289514.1	562	29555.5	ATVIGANNQAGK;RYDSSTTTFSPEGR	1;1	2	11	225824;225825;225828;225833;225834;260246;260247;260248;260250;260251;310641	EED93051.1;EJK61739.1	20S proteasome subunit PAC1 [Thalassiosira pseudonana CCMP1335]	1.0464	11	0.671133	0.877766	0.902537	11	0.0605939	0.3008	1.05885	11	0.750125	0.912205	0.983902	10	0.829517	0.945073	0.877189	10	0.00569943	0.0448488	0.705684	9	0.00019998	0.00281222	1.0578	11	0.206279	0.57829	0.837171	11	0.0869913	0.286419	0.932201	11	0.126787	0.435287	0.802429	11	0.00249975
140	XP_002289747.1	190	30177.4	RYETFFGPGVGAEVVK;LTTGGPLSEEYLASK;YETFFGPGVGAEVVK;YGDEAHLDTTVK	1;1;1;1	4	11	63848;306162;306198;306201;306202;306207;310169;310170;310173;310186;316556	EED93284.1	predicted protein [Thalassiosira pseudonana CCMP1335]	0.753661	10	0.00029997	0.00505183	0.833404	11	0.00209979	0.0329028	0.67374	9	0.0001	0.00211861	0.748041	10	0.0001	0.00261133	0.955553	10	0.346165	0.697803	0.651391	10	0.0001	0.0016362	0.96067	11	0.641036	0.880859	0.666661	11	0.00019998	0.00262893	1.07814	11	0.147285	0.47147	1.08566	10	0.193081
141	XP_002290123.1	903	41232	LDPYAAAAR;GPLVIYK;NLPGVELCCVDR;LNLLQLAPGGHMGR;DILAAVGALADVEK;IINSDEIQSVLNPAK	0;1;0;0;1;1	3	11	81445;124035;124038;124039;221795;221798;232708;232709;232710;232718;232719;236359;236367;236369;276798;276799;276801;276802;276805;315229;315230;315231	EED91875.1	RL4e, ribosomal protein 4e 60S large ribosomal subunit [Thalassiosira pseudonana CCMP1335]	0.27661	11	0.0001	0.00219734	0.548784	11	0.0001	0.00353298	0.268951	9	0.0001	0.00211861	0.396683	11	0.00019998	0.00462005	0.624691	9	0.0001	0.00219734	0.191882	11	0.0001	0.0016362	0.727051	11	0.00159984	0.0264487	0.219822	11	0.0001	0.00166743	1.14311	11	0.0288971	0.175628	1.04942	11	0.589641
142	XP_002291359.1	1532	32262.9	MGLGDEEIVALSGAHTFGR	1	1	11	316841;316846;316848;316849;316851;316852;318683;318684;318685;318687;318688	EED91466.1	ascorbate peroxidase, partial [Thalassiosira pseudonana CCMP1335]	1.17971	11	0.0242976	0.128024	1.0354	11	0.512949	0.79946	1.04526	10	0.629537	0.862318	0.959462	10	0.408359	0.754732	1.10785	10	0.079592	0.301059	1.04695	11	0.646535	0.84087	1.04487	11	0.440556	0.781555	1.00151	10	0.984902	0.992112	1.1283	11	0.222778	0.573358	1.24911	11	0.0217978
143	XP_002291363.1	651	136373	FSWVIETR;AMEFLHFR;TDIPVVIIFR;VFIGPTFYQR;NTYQSAMGK;EFLGYVPIMLR	1;1;1;1;1;1	6	11	107417;111081;111082;115796;148988;148989;166217;166218;189667;198520;202687	EED91470.1	DNA directed RNA polymerase II, second largest subunit [Thalassiosira pseudonana CCMP1335]	0.811604	9	0.00369963	0.0337286	0.902222	10	0.00259974	0.0374779	0.721511	9	0.00029997	0.00478094	0.850798	11	0.0269973	0.158466	0.837665	11	0.0340966	0.168334	0.958466	11	0.412159	0.693688	1.02902	11	0.638436	0.879696	1.20164	11	0.00209979	0.0183579	1.20427	10	0.0251975	0.158497	0.931391	11	0.541246
144	XP_002292930.1	546	194217	ISAYVYR;AIQCFVQR;MLQPWLEAR;VASYIDQLDNFDAK;LATHELLEFR;QVCFACLK;MIQMFNLDTK;LALCHIHLEEYR;IILQGSDFSDNK;LFVMEVGRDPSK;YIQSACMLGQFK;VQETTAFLLEALK;AFLTNNMFYEPK;IYIQMNKDPK;TGDWALQIGQAYMK;NSHQMNPEFVVTYFGK;VLGPFCESLDPSLAFVAYK;GLVSAEGGPLIDIQATAEAFLSSNR	0;0;0;1;0;0;0;0;0;0;0;0;0;0;1;0;0;0	2	11	62136;62140;102710;102712;102713;102714;139703;139711;139716;139717;144616;144617;147185;310034;310045;310048;310050;310051;310064;166511;196397;196413;248209;248210;248211;251622;251626;251627;251630;250103;250104;250119;250120;304584;267594;267627;267629;267633;267641;267645;275442;275443;278540;287429;287432;287433;289791;289792;290067;291916;291924;294597;294599;304639;307974;309901;309902;30…	EED90126.1	clathrin heavy chain [Thalassiosira pseudonana CCMP1335]	0.794243	10	0.00389961	0.0342785	0.837087	11	0.0129987	0.113158	0.787378	11	0.0117988	0.0772715	0.86623	11	0.0175982	0.118558	0.704264	11	0.00049995	0.00763483	0.872145	8	0.0235976	0.108634	0.919908	11	0.00769923	0.0788296	1.18692	11	0.0510949	0.198284	1.00514	11	0.909309	0.981636	0.77525	11	0.0119988
145	XP_002293195.1	1682	8598.17	GFAFVTMPAK	1	1	11	207464;207473;207474;207477;207480;207481;207482;211476;211480;211485;211486	EED89656.1;EJK75167.1	predicted protein, partial [Thalassiosira pseudonana CCMP1335]	0.657198	11	0.0001	0.00219734	0.584312	11	0.0001	0.00353298	0.434779	11	0.00039996	0.00610447	0.387712	11	0.00039996	0.00750758	0.843782	9	0.00279972	0.0260056	0.507489	10	0.0001	0.0016362	0.805853	11	0.00019998	0.00621317	0.465547	10	0.0001	0.00166743	0.805171	11	0.0647935	0.300422	0.860009	11	0.142286
146	XP_002293725.1	433	52967.5	ETPSMFVVR;LVANAFLAQR;IHVYDPQVSR;EQIITTNLWSSELSK;FLNSSIGFGGSCFQK	0;0;1;1;0	2	11	115502;115510;120377;120378;120379;120386;126783;161826;161829;161830;161831;242220;179020;327040;327041;327042;327043;327044;316036	EED88734.1	udp-d-glucose 6-dehydrogenase [Thalassiosira pseudonana CCMP1335]	0.972669	11	0.860214	0.962201	1.096	11	0.336566	0.685302	0.970047	11	0.728527	0.904881	1.06016	10	0.284772	0.652044	1.02619	11	0.647735	0.888177	1.14768	11	0.0260974	0.117438	1.07716	11	0.0849915	0.369939	1.22163	11	0.00229977	0.0199129	1.04968	11	0.70303	0.923726	0.985895	11	0.905909
147	AAF81906.1	154	50210.8	FPGQLNCDLR;INVYFNEATGGR;AILMDLEPGTMDSVR;GHYTEGAELIDSVLDVVR;EIVHIQGGQCGNQIGAK	0;1;1;1;1	4	10	163562;163563;163564;163567;163568;163569;163571;199211;199212;268924;268925;268927;268931;318424;344418;344422;332592	sp|Q9LKI8.1|TBB_THAWE;XP_002292479.1;EED90454.1	beta-tubulin [Thalassiosira weissflogii]	1.0563	10	0.667633	0.875488	1.01454	8	0.872113	0.953168	0.950566	10	0.60064	0.845119	1.12007	10	0.334667	0.693981	0.759069	10	0.0553945	0.241971	0.567363	10	0.00179982	0.0158808	1.10512	10	0.251375	0.63001	0.770955	9	0.0165983	0.0876645	2.52539	10	0.00019998	0.00553483	1.586	8	0.0001
148	AIR75624.1	413	57515.9	APGFGELR;LSGGIAVIR;GIVNVVAVR;EDELIGAIIISR;EALATLILNK;RPLLIIAEDVEK;GFISPYFITDTEK;NNLKEDELIGAIIISR;MEVSYDNPYILLTDK;MEVSYDNPYILLTDKR;ITLVQQDLLPILEQITK	0;0;0;1;0;0;0;1;1;1;0	4	10	56218;65740;65742;65743;75904;75905;75906;75910;75911;196230;211824;211825;278988;278989;278990;278991;278994;278995;278996;299098;299107;331601;331602;331603;331820;331823;331824;331826;333236;343406;343963;343964;343965	AIR75483.1	chaperonin GroEL (chloroplast) [Cyclotella sp. WC03_2]	0.775135	10	0.00269973	0.0267303	0.849492	9	0.00489951	0.0577053	0.815803	10	0.0694931	0.255945	0.934394	10	0.457954	0.789565	1.09683	9	0.0780922	0.299409	0.868644	9	0.0183982	0.0922345	0.932652	10	0.159184	0.510142	0.70689	9	0.0001	0.00166743	0.799815	10	0.0431957	0.22923	0.869258	8	0.0166983
149	CBF60637.1	95	230206	GFSGGSR;SVGIGAYLVR;SQLLLAMIR;VYIACNSGAR;EYLAGWGK;YPFHVER;NSVEYLVK;NVQIYVGSEK;GGILEPAGIVEIK;IFEEGPPSIVPK;AYDEIFTLSYVTGR;IGLVDDLKPK;QGPMILTGYGALNK;FIGPTGPVMSVLGDK	0;0;1;0;1;0;0;0;0;0;0;1;1;0	4	10	23202;106635;106636;114130;114131;129242;166258;173844;175230;175233;175238;224234;224240;259621;259624;259626;259627;262946;262947;262948;262954;266439;266440;266442;280098;280100;290046;290047;290048;292650;292653;299145;299146	AAA81471.1;CBU85854.1;CBV09047.1;CBF60001.1;CBU88939.1;CBU86758.1;CBF95527.1;CBF61882.1;CBF68277.1;CBU93151.1;CBU85245.1;CBF64063.1	unnamed protein product [Cyclotella cryptica]	1.05734	9	0.244876	0.554354	1.06396	10	0.228577	0.602097	1.09742	10	0.374163	0.692595	1.06446	10	0.0952905	0.3455	1.30205	10	0.0445955	0.206054	1.07403	10	0.655834	0.847103	1.0357	10	0.519948	0.825161	0.920247	9	0.19608	0.4665	0.991028	10	0.924708	0.985949	1.23822	10	0.09979
150	EED91058.1	1466	53055.4	ATDVMMAGK;HSLPDGIMR;VADISLADYGR;FDNLYGCK;INIKPQVDR;AVICGYGDVGK;KAEDAFLK;SKFDNLYGCK;KAVICGYGDVGK;WCSCNIFSTQDHAAAAIAR;NNAIVGNIGHFDNEIDMAGLMK	0;1;0;1;0;0;0;1;0;0;1	4	10	32462;166166;166172;166173;166177;166178;166180;166181;171120;171121;171125;171128;171129;171132;171133;171134;171136;171137;171138;171139;103879;108554;151001;151008;151011;151012;151016;151024;151030;234307;194053;194060;211120;211124;211129;211134;224657;224658;224660;224661;224665;224666;224667;286969;286971;245052;245053;245054;245060;245061;245062;245064;245068;302017;302018;306788;306789;3…	XP_002290951.1;EED91449.1;XP_002291342.1	hypothetical protein THAPSDRAFT_28496 [Thalassiosira pseudonana CCMP1335]	1.17081	10	0.0467953	0.204673	0.911291	10	0.374963	0.704603	1.47225	10	0.00609939	0.0473491	1.15875	10	0.138886	0.44006	1.1556	10	0.0225977	0.123025	1.90943	9	0.0001	0.0016362	1.26039	10	0.0178982	0.140229	2.20009	10	0.0001	0.00166743	0.46881	10	0.00089991	0.0149902	0.418926	10	0.00079992
151	EED92254.1	1078	40653.3	GYTVHGIIR;FYQASTSELYGK;VQEVPQSETTPFYPR	1;1;1	3	10	100956;278441;291717;291718;291719;291724;291725;291726;329734;329735	XP_002290502.1	gdp-d-mannose 4,6-dehydratase [Thalassiosira pseudonana CCMP1335]	0.705052	10	0.0348965	0.167243	1.255	10	0.0139986	0.115713	0.675134	10	0.0619938	0.240627	1.242	10	0.00289971	0.0318614	1.2516	10	0.0237976	0.12725	1.33285	9	0.00049995	0.00573191	0.869142	9	0.00889911	0.0895877	0.9219	9	0.0708929	0.249859	0.742031	10	0.0229977	0.150447	1.01969	10	0.824318
152	EED94317.1	571	37144.2	RHDLDLVVR;YPENFFILR;GVSFTFGGDVVR;ICGDIHGQYTDLLR;AHQVVEDGYEFFAGR;IKYPENFFILR;EVLLSQPMLLELGAPIK;KPGTPVDISVQDATNLCNQAR	1;1;0;1;0;1;1;1	6	10	133093;157043;157050;170169;170173;170177;170178;271328;271336;283199;283200;283203;283204;324585;286466;286470;336024;337191;358608	XP_002288881.1	serine threonine protein phosphatase [Thalassiosira pseudonana CCMP1335]	1.51481	9	0.00049995	0.00763483	1.22625	10	0.0148985	0.120391	1.43974	6	0.00219978	0.0225102	1.25318	10	0.0179982	0.120121	1.0897	10	0.0376962	0.183096	1.71878	10	0.0001	0.0016362	1.23008	9	0.00359964	0.0456799	1.90813	8	0.0001	0.00166743	0.857758	10	0.0357964	0.20436	0.72534	9	0.00339966
153	EED94786.1	1259	52725.4	SSLNSTMK;NHVENPVTLLL;EAVMMTATLSCDHR;EPQACALALGVIENR;VVDGAVGAQWLSAFK	1;1;1;1;1	5	10	148566;172809;266978;267561;267562;267563;267572;267574;303782;303794	XP_002287343.1	dihydrolipoamide s-acetyltransferase [Thalassiosira pseudonana CCMP1335]	1.00788	10	0.963104	0.98641	1.00886	10	0.831817	0.93742	0.771087	10	0.219178	0.525619	0.787784	10	0.0405959	0.208416	1.08727	10	0.165983	0.461855	1.14428	10	0.227477	0.493324	1.03874	10	0.483252	0.814524	1.09399	10	0.408459	0.705307	1.17228	10	0.172883	0.508196	1.23584	8	0.00859914
154	EED95211.1	1382	27423.7	LDPLQFLK	1	1	10	182309;182310;182313;182314;182315;182316;182317;182318;182319;182320	XP_002287768.1;EJK77608.1	fucoxanthin chlorophyll a/c protein [Thalassiosira pseudonana CCMP1335]	0.522687	8	0.0001	0.00219734	0.671348	9	0.00019998	0.00621317	0.420685	8	0.0001	0.00211861	0.52454	8	0.0001	0.00261133	0.909029	10	0.175882	0.476523	0.389391	8	0.0001	0.0016362	0.887391	10	0.00369963	0.0465777	0.385861	8	0.0001	0.00166743	1.47309	10	0.00019998	0.00553483	1.55146	10	0.00109989
155	EJK46744.1	1321	26715.3	AGYFLPQGI	1	1	10	86671;86679;86686;86692;86693;86694;86695;179856;179857;179858	EED94820.1;XP_002287377.1	hypothetical protein THAOC_34573 [Thalassiosira oceanica]	0.211353	10	0.0001	0.00219734	0.670794	10	0.00489951	0.0577053	0.138059	10	0.0001	0.00211861	0.447938	10	0.00139986	0.0186855	0.951496	9	0.20098	0.512257	0.524312	10	0.0001	0.0016362	0.890077	9	0.00529947	0.0585868	0.49002	10	0.00019998	0.00262893	1.01291	10	0.860314	0.969539	1.08349	10	0.349465
156	EJK46971.1	812	24106	DHAEANIVVMLVGNK;ILTEIYR;AITSAYYR;VVLIGDSGVGK;STIGVEFATK;GAVGALLVYDISK	1;1;1;1;0;1	5	10	48983;311442;313424;71102;80608;201218;201220;203571;203572;203579;261638;261640;261641	ACI64969.1;XP_002296252.1	hypothetical protein THAOC_34340 [Thalassiosira oceanica]	0.970886	9	0.546345	0.820763	0.947066	10	0.482352	0.773628	1.10404	8	0.10259	0.33964	1.03056	10	0.718228	0.905182	1.27373	8	0.00179982	0.018533	1.24736	9	0.00509949	0.0342503	1.21181	10	0.0317968	0.205922	1.28793	10	0.0236976	0.114292	0.856863	10	0.0482952	0.242341	0.815443	9	0.010399
157	EJK49989.1	123	74294.5	LDGMLIDGK;FQGVNLYVK;ALDSMNFTDIK	0;0;1	1	10	178335;207310;251228;251229;251230;251231;251232;251235;251236;251242;254557;254558	-	hypothetical protein THAOC_31088, partial [Thalassiosira oceanica]	0.721522	10	0.00159984	0.0179063	0.758701	10	0.00069993	0.014666	0.667909	9	0.0001	0.00211861	0.726312	10	0.00019998	0.00462005	0.913181	8	0.040196	0.191592	1.15871	10	0.0361964	0.148076	1.09867	10	0.140886	0.479352	1.286	10	0.00179982	0.0162888	0.646891	10	0.00159984	0.0241858	0.576456	10	0.0009999
158	EJK60133.1	1717	145770	LASNEALNAFGDGR;GLYAPFESGQK;EAVPDIPFQMLLR	1;1;1	3	10	58208;222600;222606;238204;244678;244683;248225;248226;248227;248230	-	hypothetical protein THAOC_19570, partial [Thalassiosira oceanica]	1.49682	10	0.0001	0.00219734	1.31043	10	0.00489951	0.0577053	1.20252	9	0.0161984	0.0966003	1.13637	10	0.20488	0.555944	1.28063	9	0.0110989	0.072728	1.09341	10	0.326567	0.609773	0.907046	9	0.182782	0.539955	0.797673	9	0.00019998	0.00262893	1.55341	10	0.0001	0.0035271	2.18788	10	0.0001
159	EJK65869.1	358	106129	LFMSDDASLR;AGYAFLEASLR;IVDAAMLGAIER;EVADPAAAVYAIPELAALGR	0;1;1;1	3	10	142919;156627;156645;176076;176083;181167;181181;181182;181185;321143;321145	-	hypothetical protein THAOC_13228 [Thalassiosira oceanica]	0.659044	10	0.00069993	0.0095551	0.949175	10	0.523848	0.806815	0.563844	10	0.0019998	0.0208187	0.827542	10	0.0947905	0.344743	0.736248	10	0.0290971	0.150238	0.795379	10	0.122088	0.34071	0.94363	10	0.441956	0.781555	1.02315	10	0.810819	0.93608	1.19793	10	0.0993901	0.378819	0.955006	10	0.587941
160	EJK74743.1	1757	19481.4	VIHFVNPK;LGATNIPGIEEVNLFK;LGATNIPGIEEVNLFKEDGK	1;1;1	3	10	175907;175911;175912;323546;323550;323554;323555;323556;323557;362610	-	hypothetical protein THAOC_03563 [Thalassiosira oceanica]	1.10019	10	0.248675	0.557431	0.805204	10	0.0465953	0.263213	0.855022	9	0.00889911	0.0616435	0.652202	10	0.00049995	0.0091001	0.77385	10	0.00029997	0.00514806	1.15104	9	0.0280972	0.123354	0.960242	10	0.524848	0.8289	1.37295	10	0.00039996	0.00461749	0.868605	10	0.151285	0.477585	0.699909	10	0.0147985
161	EJK74953.1	98	155976	DDTHYVSLIAELESR;NPDVLPTGR;LLDTNPNAFR;ELISSYQGLR;SVVADFMK;IDVVVSCSGVFR;QVGMSGTCYPDR;TAPTVGIILQK;DLFINQMNLMDR;FYEGMLSTGYEGVR;DQLDAVLIFPSMPEVMR;GNVGTAAYLDVFDSIK;NMHALDPSAIPTQAAVEVAEDVVR	1;0;0;0;0;0;0;0;0;0;1;0;1	3	10	62771;87478;144923;144924;146620;157724;157725;162703;198483;198484;198485;198486;206792;225136;225137;225140;240306;240317;243917;243922;247476;247477;247480;264428;264430;316979;318858;318860;318861;318862;320650;318580;357184;357185;357186	-	hypothetical protein THAOC_03343 [Thalassiosira oceanica]	0.871513	35	0.00339966	0.0320743	0.939169	34	0.166083	0.53348	0.889716	35	0.0327967	0.156676	0.96974	34	0.583742	0.862868	0.912574	35	0.00549945	0.0440445	0.840607	35	0.00149985	0.0138448	0.942999	33	0.0144986	0.121518	0.811496	32	0.0001	0.00166743	1.08265	31	0.0305969	0.181657	1.08518	33	0.0824918
162	EJK78072.1	1051	53308.4	FTGTMQPGITLR;WMISEGYGDPR;VEPGCTVVSTSTR;VLEIEGLPDLK;MLVPDTVGTGGDSHTR;GGVSLRPGDGIIHSWLNR;IDEVFIGSCMTNIGHFR	1;1;1;0;0;0;0	3	10	44521;194379;194380;194383;198487;198488;198496;191402;212334;212337;245049;245057;245058;245059;245065;245066;267903;267904;270946;270948;270950;313875;313880;313881;313884;320952	-	hypothetical protein THAOC_00049 [Thalassiosira oceanica]	1.19642	10	0.0365963	0.173107	1.23376	10	0.0143986	0.117404	0.960315	9	0.519948	0.796959	0.965112	10	0.584642	0.862868	0.922167	8	0.0605939	0.253342	1.24266	10	0.0188981	0.0937096	0.943146	9	0.325167	0.710065	1.30365	10	0.00629937	0.0406637	1.17654	10	0.182782	0.522773	1.121	10	0.317368
163	XP_002286323.1	674	70570.5	GESQSGAGIVLGK;FSGSGSDTDIITSSAR;STYEIMTPESIGLMR;AGNASLEEVVMSLALK;LYTAINPVYITPTSK;KFSGSGSDTDIITSSAR;QIADVVGNEVFEDGYVPVIAGLSR	1;1;1;1;1;1;1	7	10	239735;259636;283743;314172;315954;319787;319788;325024;325025;357136	EED95964.1	predicted protein [Thalassiosira pseudonana CCMP1335]	0.976327	9	0.735726	0.90617	1.04628	10	0.475352	0.768927	1.05245	10	0.679532	0.888771	1.08303	10	0.364064	0.710003	0.932459	10	0.40026	0.736356	1.2387	10	0.0372963	0.151885	0.832611	9	0.00019998	0.00621317	1.11792	10	0.251775	0.546321	0.920353	10	0.413659	0.766397	1.00808	10	0.89951
164	XP_002288279.1	1569	47731.4	GYGGGVI;LPFFGCPTAGNR;MFHWEGETAAAK;QLETSPATIDVLPSIR	1;1;1;1	4	10	17617;17620;198171;198172;275362;285752;285758;285769;285770;285773	EED93715.1	l-lactate dehydrogenase [Thalassiosira pseudonana CCMP1335]	0.873466	10	0.219478	0.514605	0.859213	10	0.0538946	0.284804	0.774814	10	0.0423958	0.184878	0.764785	10	0.0176982	0.118558	0.980927	10	0.621438	0.878299	0.863115	10	0.040196	0.161142	0.931858	10	0.288171	0.674395	0.820229	10	0.040396	0.166103	1.0379	10	0.715728	0.928461	1.08875	10	0.332667
165	XP_002289138.1	403	40062.7	TLQESVASELAAR;LGGEAADLPLLTQR;TLVPFSASEISQK	0;1;1	2	10	207984;207985;207987;207990;207991;207992;227264;227265;227266;227267;227270;227271;227272;227274;280919;280920	EED92675.1	ATP synthase [Thalassiosira pseudonana CCMP1335]	0.560273	10	0.0001	0.00219734	0.700353	10	0.00159984	0.0277203	0.455444	10	0.0001	0.00211861	0.575197	10	0.00449955	0.0447966	1.03165	8	0.651335	0.888498	0.424808	10	0.0001	0.0016362	0.65858	10	0.00039996	0.0093601	0.225168	10	0.0001	0.00166743	1.30309	10	0.0001	0.0035271	2.41702	10	0.00019998
166	XP_002289637.1	539	47656.8	CNDLLLLR;FFNTNNLWIR;YPSLAAEEGLEMLQNK;YMFVSNSDNLGATLDLK	0;0;1;0	1	10	101194;101195;101204;101205;195125;331154;331156;331157;331158;331159;331160;331162;331163;331164;332574;338651	EED93174.1	hypothetical protein THAPSDRAFT_262059, partial [Thalassiosira pseudonana CCMP1335]	0.839702	9	0.00779922	0.0538475	1.04104	10	0.250575	0.62888	1.18517	10	0.050195	0.210235	1.38487	10	0.0001	0.00261133	0.97323	10	0.766523	0.921723	1.16983	10	0.137286	0.367185	0.872698	10	0.0225977	0.164198	1.09124	9	0.131887	0.377029	0.764344	9	0.00489951	0.0486973	0.862666	9	0.00809919
167	XP_002289769.1	856	20263.7	VLEQLTGQQPVYSK;FEGVVLAK;LILNCCVGESGDR	1;1;1	3	10	145313;309027;309028;309029;309030;309032;309033;147054;236287;236289	EED93306.1	RL11A, ribosomal protein 11A 60S large ribosomal subunit [Thalassiosira pseudonana CCMP1335]	0.544781	10	0.00109989	0.013302	0.740209	9	0.00859914	0.0851409	0.394844	10	0.0001	0.00211861	0.498712	10	0.00239976	0.0280803	0.629535	10	0.00509949	0.0417695	0.403647	7	0.0001	0.0016362	0.603349	9	0.00019998	0.00621317	0.367491	8	0.0001	0.00166743	0.96742	9	0.510849	0.830187	1.11438	9	0.0632937
168	XP_002296774.1	1155	14117.6	LTLDFHTNK;IAGFTTHLMK;IIDEIAITPSK	1;1;1	3	10	212472;223632;239102;239103;239104;239105;239106;239107;239108;239109	EED86975.1	predicted protein, partial [Thalassiosira pseudonana CCMP1335]	0.497963	10	0.0001	0.00219734	0.780858	10	0.00149985	0.0264973	0.469845	9	0.0001	0.00211861	0.684345	10	0.00229977	0.0272644	0.525352	9	0.0001	0.00219734	0.458757	9	0.0001	0.0016362	0.677929	10	0.00059994	0.0124263	0.585488	10	0.00039996	0.00461749	1.00599	10	0.884912	0.978461	0.861838	10	0.089891
169	AIR75596.1	3	9489.82	QQVPLVNDR;SGGSTGERPFSDIITSVR	1;1	2	9	116521;116523;116524;116529;116530;116532;305571;305572;305573	ABK20777.1;YP_009093198.1;AIR76144.1;EJK52346.1;ADB27507.1;XP_002297507.1;sp|A0T0U2.1|PSBE_THAPS;EJK55852.1;EED86147.1;AIR75455.1;YP_004072553.1;AIR75871.1;YP_874554.1;YP_009093471.1	photosystem II cytochrome b559 alpha subunit (chloroplast) [Cyclotella sp. WC03_2]	0.526632	9	0.00019998	0.00367718	0.68814	8	0.0001	0.00353298	0.321903	9	0.0001	0.00211861	0.442714	9	0.0001	0.00261133	1.01758	9	0.882712	0.960064	0.569553	9	0.0001	0.0016362	0.877161	9	0.113789	0.435027	0.480699	9	0.00069993	0.00732892	1.34529	9	0.0670933	0.3048	1.64051	8	0.0001
170	AIR75846.1	663	14455.7	LEGINYLS;WTPIILCGGLAEIDR	1;1	2	9	71253;71254;71262;71263;71264;71270;281387;281388;281389	sp|A0T0R7.1|ATPE_THAPS;YP_009093173.1;AIR75571.1;AIR75430.1;YP_009093446.1;AIR76119.1;ABK20752.1;YP_874529.1	ATP synthase CF1 epsilon subunit (chloroplast) [Roundia cardiophora]	0.747674	9	0.0281972	0.141536	0.684997	9	0.0140986	0.116008	0.38643	9	0.00029997	0.00478094	0.361464	9	0.00039996	0.00750758	1.6419	9	0.00729927	0.0557343	0.389118	9	0.0001	0.0016362	0.966391	9	0.658134	0.887638	0.223343	9	0.0001	0.00166743	1.36645	9	0.0561944	0.269583	2.31858	5	0.0001
171	ANG60896.1	316	92288.7	VLISDEFDLMPR;DTGLGMTK;SGTTNFMK;EIYVFPGESIK;AQAFAHGVAPGENMMPTGILELNPR	0;1;1;1;1	4	9	60889;222641;222650;222655;226498;226499;134245;134250;154082;256668;256669;256675;256677;359543;359544	-	heat shock protein 90 [Skeletonema marinoi]	0.737806	15	0.00939906	0.0629632	1.05265	15	0.39786	0.718203	0.600419	15	0.00019998	0.00360164	0.881946	15	0.0473953	0.230071	0.928932	15	0.0343966	0.169351	0.729698	14	0.0001	0.0016362	0.882535	15	0.0001	0.00367718	0.656451	15	0.0001	0.00166743	1.02323	15	0.720928	0.931048	1.09146	15	0.142886
172	CAA04226.1	630	20393.4	AAMMGILGLMVHEQLGGSVPIVGEL	1	1	9	356833;356836;356841;357353;357354;357357;357946;357952;357956	CAA04400.1;CAA04178.1	fucoxanthin chlorophyll a /c protein, partial [Cyclotella cryptica]	0.722051	9	0.00439956	0.0372207	0.948852	9	0.327667	0.684984	0.432267	9	0.00279972	0.0268207	0.59166	9	0.009999	0.0786821	1.29299	8	0.00589941	0.0460205	0.591371	9	0.0129987	0.0678193	1.00641	5	0.893211	0.976086	0.537607	9	0.00269973	0.0228273	1.48242	9	0.00059994	0.011361	1.69777	9	0.00139986
173	EED87082.1	575	123138	RLEASTFLR;VFFHLEEPR;LLLESFNPHVR;MGAILSTGLIDAGGR	1;1;1;1	4	9	123666;123667;123673;149176;149177;149178;149179;195193;221936	XP_002296386.1	26S proteasome regulatory subunit Rpn2 26S subunit, non-atpase [Thalassiosira pseudonana CCMP1335]	0.980199	9	0.849915	0.958415	0.81292	9	0.0190981	0.142675	0.992102	9	0.970103	0.985131	0.811419	9	0.0187981	0.123629	0.789807	8	0.00139986	0.0154758	0.803126	9	0.0392961	0.158594	1.0002	9	0.997	0.9993	0.979049	9	0.854015	0.955339	0.927357	9	0.325067	0.700638	0.765912	9	0.00769923
174	EED90225.1	79	42761.5	ITEAGLTCR;DKITEAGLTCR;DVVHCMETAQYLR;IDYLNSVDTTIMGSR;QFECSVIDFFAK	1;1;1;1;1	5	9	102312;253106;253108;263803;266983;279017;279018;294600;294601	XP_002292250.1	histidine decarboxylase, partial [Thalassiosira pseudonana CCMP1335]	0.880794	9	0.231277	0.534309	1.04031	9	0.577742	0.844356	0.881143	9	0.226777	0.531113	1.02594	7	0.628237	0.885578	0.850922	9	0.0178982	0.104377	0.934288	8	0.421858	0.700132	1.04049	8	0.194481	0.564338	1.09551	8	0.275772	0.573517	0.977564	9	0.825417	0.955132	0.832211	9	0.0931907
175	EED90959.1	1189	76353.1	VLSYYGDTPR;ASNPLVMVQSYR;TLFDLQETTAK;GMVESALEFADICR;SAVGIGTLLADGLGDTVR	1;1;1;1;1	5	9	148156;148161;148163;205291;209350;253788;258980;258982;281586	XP_002292108.1	gcpe-like protein [Thalassiosira pseudonana CCMP1335]	0.856367	9	0.0630937	0.246093	1.04016	9	0.662634	0.884231	0.817133	9	0.0806919	0.284953	1.01481	9	0.866113	0.956266	1.05118	8	0.473153	0.790864	0.907929	9	0.30177	0.582817	1.00065	8	0.987601	0.997566	0.854783	9	0.0111989	0.0642331	0.850204	9	0.0819918	0.342235	0.857306	8	0.0106989
176	EED93041.1	629	34888.2	MLDMLQQTGR;HYYSIVIDYR;AVALVVDPIQSVK;LINPQLMMMGQEPR	1;1;1;1	4	9	154916;160083;165124;196109;196110;267994;267995;267996;270848	XP_002289504.1	26S proteasome regulatory subunit [Thalassiosira pseudonana CCMP1335]	0.809079	7	0.00339966	0.0320743	0.985158	9	0.861514	0.948929	0.789516	8	0.132387	0.397918	1.2225	6	0.00939906	0.0746128	0.803525	8	0.00089991	0.0111837	0.877142	9	0.0540946	0.199529	0.871257	8	0.00329967	0.042777	0.886977	8	0.0936906	0.300243	0.952391	9	0.682232	0.915848	0.888106	9	0.388561
177	EED93639.1	487	62800.3	NQVLFER;EPTITPSAIQVQEMGLK;VTPYIVTK;DGGAPFVVDKR;WQEGFWATMK;DTIHIEGIELGYK;VFDDTYKDEFLK;WTDGGFGMAAHNYDGDMLTDQIAQVHR	0;1;1;1;0;0;1;0	4	9	70480;76589;335317;335318;335319;336522;165370;229856;257019;294164;294165;294168;333848;333855;366312	XP_002288203.1	predicted protein [Thalassiosira pseudonana CCMP1335]	1.06364	7	0.242876	0.551907	1.02541	8	0.470953	0.76764	1.19484	8	0.00919908	0.0634772	0.993498	9	0.942406	0.98106	0.755908	9	0.00459954	0.0383721	1.00699	8	0.907209	0.969701	1.23524	8	0.00059994	0.0124263	1.5051	9	0.00179982	0.0162888	1.11745	9	0.227377	0.576785	0.728281	9	0.0115988
178	EED94042.1	646	32900.6	GDVGEVFYILK;YMLANNNASQQK;VHDIGFGDSQYVDQILGPGDFFGER	1;1;1	3	9	248031;248041;248043;248044;276065;279262;279263;362936;362938	XP_002288606.1	Hypothetical protein THAPSDRAFT_32704, partial [Thalassiosira pseudonana CCMP1335]	1.19751	9	0.307669	0.625051	1.11356	9	0.212879	0.58655	1.53203	9	0.0190981	0.106819	1.38535	9	0.00389961	0.0403856	1.08495	9	0.307569	0.65867	1.17372	7	0.0223978	0.105184	1.05288	9	0.438456	0.781555	1.23668	5	0.0314968	0.138356	0.986368	9	0.846315	0.962403	1.0617	8	0.242976
179	EED94198.1	1576	38767.1	LLSFPTILEK;TTTSCCLGTQLAK;NILEQESLQWIFVGGK;FGIDSHNIVVNQVLFPEK;VLIVSTDPAHNLSDAFCQK;QVQNMDYDVVVFDTAPTGHTLR	1;1;1;1;1;1	6	9	229925;286520;336764;349124;349125;351937;355680;355681;356224	XP_002288762.1	anion-transporting ATPase [Thalassiosira pseudonana CCMP1335]	1.06365	9	0.527547	0.809745	1.18867	8	0.00539946	0.0611939	1.1619	9	0.30117	0.624174	1.3015	5	0.00749925	0.0634444	0.833781	9	0.040296	0.191592	0.716171	6	0.0019998	0.0168997	0.748339	7	0.0001	0.00367718	0.689868	9	0.00089991	0.00895435	0.72868	9	0.0118988	0.0926431	0.724096	9	0.0159984
180	EED94357.1	151	125130	GWFEMMIAR;ALQDKPDFAAK;GLSCQAYDAANDVYFTK	1;1;1	3	9	148675;148677;297509;297510;297511;341112;341114;341115;341117	XP_002288921.1	probable isoleucine-trna synthetase [Thalassiosira pseudonana CCMP1335]	1.07192	9	0.575942	0.8363	0.918694	8	0.360464	0.694276	0.944051	9	0.693131	0.892178	0.870289	9	0.181382	0.517453	0.733915	9	0.00749925	0.0560732	0.797523	7	0.00519948	0.0345353	0.790033	9	0.00079992	0.015668	0.904135	9	0.232677	0.516709	0.846416	8	0.211179	0.558373	0.881042	9	0.344566
181	EED94420.1	250	22318.5	EISYVDIMR;SGIYYFNEDQK	1;1	2	9	133831;133835;133836;133837;133838;133839;133840;272686;272687	XP_002288984.1	probable peptide methionine sulfoxide reductase, partial [Thalassiosira pseudonana CCMP1335]	1.19649	9	0.0792921	0.284064	1.04235	7	0.335766	0.685302	1.22295	9	0.0559944	0.22713	1.13873	8	0.0929907	0.341282	1.12471	9	0.0609939	0.253836	1.39042	9	0.0268973	0.120137	1.25873	8	0.00049995	0.0111223	1.51875	9	0.00369963	0.0283533	0.909092	9	0.187281	0.527541	0.834219	9	0.0106989
182	EED94570.1	428	17244.2	LVAIIQNPR;ILNTNVEGK;YSQVFAQNFDAK	1;1;1	3	9	103490;103491;103492;103495;186492;282743;282744;282746;282751	XP_002287127.1	RS18, ribosomal protein 18 40S small ribosomal subunit [Thalassiosira pseudonana CCMP1335]	0.397385	9	0.00019998	0.00367718	0.873296	8	0.00349965	0.0460319	0.284216	9	0.00049995	0.00714611	0.65766	9	0.009999	0.0786821	0.471252	9	0.0001	0.00219734	0.344699	9	0.0001	0.0016362	0.517109	8	0.0001	0.00367718	0.346692	9	0.0001	0.00166743	1.1946	9	0.00089991	0.0149902	1.19281	9	0.010399
183	EJK48143.1	1262	25265.9	GSSNSYAIK;QAVDMSPFR;TMAECLAEELVNAAR	0;0;1	1	9	30953;30963;167107;167125;246090;111056;111065;115766;115769;115770;115772;115776;274567;274570;277616;277617;277618;277619;277620;277621;277623	-	hypothetical protein THAOC_33085 [Thalassiosira oceanica]	0.763221	8	0.0556944	0.229136	1.06962	7	0.323268	0.681155	0.594871	9	0.00169983	0.0184421	0.885296	8	0.0410959	0.209194	0.751636	9	0.00419958	0.0355288	0.566006	9	0.00019998	0.00281222	0.827539	6	0.00169983	0.0268692	0.575051	9	0.0001	0.00166743	1.18611	8	0.040396	0.220764	1.17515	8	0.0667933
184	EJK49691.1	1068	129845	GSSFAETVAR;GLLLMDTTWR;FLHECPWER;YNLEYYMK;ILLEQGPEGYAK;VFDSLNYLDNLK	0;0;0;1;1;0	2	9	103554;103557;159191;159192;164319;164320;164322;180803;180804;180808;220949;224844;263882;263884;263887;263889;263891;263893;263894;286563;286564;286575	-	hypothetical protein THAOC_31413, partial [Thalassiosira oceanica]	1.1491	8	0.00989901	0.0655809	0.806031	9	0.107689	0.42463	1.2899	8	0.00709929	0.0526165	0.998934	8	0.986201	0.99783	1.06505	8	0.10219	0.346791	1.1327	9	0.19898	0.461653	1.1025	8	0.0490951	0.273054	1.27497	9	0.0106989	0.0619575	0.7559	6	0.00249975	0.0308017	0.750755	8	0.00479952
185	EJK56174.1	813	17127.8	SVLIQLEEMK;FELPVWADLVK;ELAPYGDDWYYIR;NSDKFELPVWADLVK	0;0;1;0	1	9	236696;236698;236699;236700;236702;236707;236708;236710;240451;240454;240455;240459;240460;263729;271314;271315;271316;271317;271318;271319;317411;317412;317413;349517;349519	-	hypothetical protein THAOC_23991 [Thalassiosira oceanica]	0.340181	25	0.0001	0.00219734	0.488652	24	0.0001	0.00353298	0.241718	25	0.0001	0.00211861	0.332315	25	0.0001	0.00261133	0.565853	25	0.0001	0.00219734	0.269856	24	0.0001	0.0016362	0.508997	25	0.0001	0.00367718	0.236586	25	0.0001	0.00166743	0.822072	23	0.00229977	0.0293425	1.09324	21	0.0217978
186	EJK60490.1	449	26419.6	SVLAFAGLTADAR;GKDCVVLAVER;AITVFSPDGHLFQVEYAMEAVR	1;1;1	3	9	186446;186461;186462;249272;249277;249279;249286;363290;363584	EED95903.1;XP_002286262.1	hypothetical protein THAOC_19150 [Thalassiosira oceanica]	1.1705	9	0.132887	0.391918	0.986503	9	0.789921	0.918347	0.95656	7	0.638336	0.867001	0.83832	9	0.0947905	0.344743	0.846211	9	0.009999	0.0693008	0.919075	9	0.0825917	0.261448	1.05768	9	0.273973	0.65432	1.20075	8	0.0039996	0.0297656	1.11504	9	0.348665	0.717882	0.894775	9	0.180082
187	EJK61308.1	1367	16152.7	FANLDIR;AFEPVLILGQDK;SIVAYYAK;TATACAFAK	0;1;1;0	2	9	56747;93058;266357;266361;266362;266363;266367;163414;163415;163420;171450;171451;171452;171454	-	hypothetical protein THAOC_18233 [Thalassiosira oceanica]	0.42129	9	0.00259974	0.0261717	0.526546	9	0.0019998	0.0324652	0.255721	7	0.0001	0.00211861	0.415989	9	0.00039996	0.00750758	0.840926	9	0.00329967	0.0298794	0.399549	7	0.0001	0.0016362	0.849994	9	0.00019998	0.00621317	0.462256	9	0.0001	0.00166743	0.596951	9	0.0126987	0.0972128	0.589261	9	0.010299
188	EJK62766.1	86	35768.1	ELQAPYELVK;GGVIMDVMNVEQAK;NIGEALR;QGLAQMLK;NAVTIPVMAK;IAEAAGAVAVMALER;AVTHYKDPK;TKGEAGTGNIVEAVR	1;0;0;1;0;0;0;0	2	9	14097;236676;236678;236679;236681;236683;236691;236692;35940;294624;294630;294631;294632;294644;294645;294646;294647;294648;297274;297277;41004;155092;201205;201207;231463;231467;231473;235217;235225;272612;272613;296542;296545;296546;296551	-	hypothetical protein THAOC_16609 [Thalassiosira oceanica]	1.06309	9	0.157684	0.437823	1.02899	9	0.357464	0.694128	1.05546	8	0.366763	0.686142	0.969904	9	0.627237	0.885578	0.652176	9	0.0001	0.00219734	0.962952	9	0.424758	0.70015	0.894422	9	0.0662934	0.325111	1.37193	8	0.0001	0.00166743	0.646928	9	0.00319968	0.0376224	0.468891	9	0.00019998
189	EJK68381.1	709	42638.5	GSGYGPPLENISEAVGNTPMVK;GYPCVITMAEPFSVER	1;0	1	9	128790;356195;356197;356199;356201;356202;356203;356204;356210;304217;304219;304220;304221;304225;306296;306299;306304;336360;336361;336362	-	hypothetical protein THAOC_10442 [Thalassiosira oceanica]	1.7211	9	0.00019998	0.00367718	0.833604	8	0.00039996	0.0105989	1.83105	9	0.00029997	0.00478094	0.900565	9	0.226977	0.587595	1.52619	8	0.0001	0.00219734	1.53812	7	0.00029997	0.0038845	1.20934	6	0.00169983	0.0268692	1.22527	9	0.0145985	0.0789549	0.991663	8	0.856314	0.968874	1.189	7	0.0147985
190	EJK69497.1	446	50997.4	AVIDAVPSVEMVR;VIGGGLPVGAYGGK;FTNSGTEACMGMIR	1;0;0	1	9	210728;210739;210741;210742;210749;214642;214645;214646;214660;249138;249139;254500;260900	-	hypothetical protein THAOC_09237 [Thalassiosira oceanica]	1.03616	9	0.642936	0.869145	0.985073	9	0.879412	0.95579	1.08132	9	0.270873	0.588471	0.970355	8	0.50365	0.817637	1.26118	9	0.089591	0.323533	1.14631	9	0.427557	0.700914	1.01643	9	0.835416	0.960479	0.916202	6	0.20178	0.47691	0.917136	9	0.449655	0.790742	1.13007	9	0.333467
191	EJK69747.1	1794	32222.5	HYGALQGLDK;HGKDQVLIWR	1;1	2	9	215591;215595;215596;215603;215604;215605;215606;215609;250673	-	hypothetical protein THAOC_08963 [Thalassiosira oceanica]	1.14458	9	0.00809919	0.0552831	0.858141	6	0.0120988	0.106351	1.81201	7	0.0001	0.00211861	1.32084	9	0.00139986	0.0186855	1.75229	9	0.00029997	0.00514806	2.00465	9	0.0001	0.0016362	1.68306	9	0.00029997	0.00772209	2.00824	9	0.0001	0.00166743	0.471482	7	0.0001	0.0035271	0.5368	9	0.00019998
192	EJK69967.1	482	140473	QNYLDNSLR;MYFLSADLTGQSYDMGR;DYNDFNIDPTYFSQGPGNYR	0;1;0	1	9	132930;132936;316254;316255;316256;318144;318145;318146;318151;318152;319956;350240;350241;350242;350243;350244;361344;361345	-	hypothetical protein THAOC_08721 [Thalassiosira oceanica]	1.13146	8	0.140686	0.407582	0.946425	5	0.344966	0.687641	1.10763	9	0.484852	0.775406	1.01722	9	0.885111	0.965985	1.09879	9	0.289771	0.640573	1.44549	9	0.00869913	0.0493957	1.06508	8	0.228577	0.600432	1.47661	9	0.00509949	0.0350541	0.761715	9	0.089791	0.35502	0.731175	9	0.0507949
193	EJK70025.1	1090	37675.9	IFQMGLK;VNTISAGPLK;AVEADYGK;VIPGYGGGMSSAK;FGPIMNDGGNMLSLTYIASEK;TFIEYAIDYSK;AASAIGKEPGQK;GYLAASSASAYSAVSLLQK;KGYLAASSASAYSAVSLLQK;ANAPLAQDLYNDDVGNSAMYLCSSMAR	1;1;0;0;1;0;0;0;0;1	4	9	138878;189782;189783;228877;228888;244462;244463;244464;244465;248000;248001;248005;262999;357628;358217;358221;358747;270075;270076;270077;270092;270093;316671;316673;289735;289738;289742;289743;338599;359617;365770	-	hypothetical protein THAOC_08655 [Thalassiosira oceanica]	1.30565	8	0.00409959	0.0356882	1.19438	7	0.00249975	0.0372277	0.881251	9	0.379062	0.695755	0.72865	8	0.00109989	0.0154844	0.84848	9	0.0206979	0.11441	0.763155	9	0.0106989	0.0585352	0.877547	9	0.0108989	0.101641	0.841704	8	0.0582942	0.21827	1.69253	9	0.00019998	0.00553483	1.68134	9	0.00019998
194	EJK75201.1	92	112062	IIGMDEPLGLR;NSVEYLVK;LPNTLNALGIK;IFEEGPPSIVPK;FIGPTGPVMSVLGDK;ANNIDTSWLDGIIK	1;0;1;0;0;1	3	9	161896;161897;166777;166778;166779;175230;175233;175238;228235;262946;262947;262948;262954;299145;299146;305386;305387;305388	-	hypothetical protein THAOC_03084 [Thalassiosira oceanica]	0.915022	7	0.138686	0.403736	1.09871	9	0.135686	0.480367	0.834067	8	0.0509949	0.212597	0.940546	8	0.178882	0.513289	1.44379	9	0.00409959	0.0350117	1.04053	9	0.569743	0.793146	1.0434	9	0.568143	0.852451	0.757497	9	0.0609939	0.224919	1.39624	9	0.030197	0.180478	1.89888	9	0.00139986
195	sp|A0T101.1|RR10_THAPS	538	12610.6	SDLPPGVLYR;LESFNHELLNTSCQK	1;1	2	9	20071;131167;131175;131176;131177;131178;131181;333441;333442	YP_874613.1;ABK20836.1;AIR75655.1;AIR75514.1	RecName: Full=30S ribosomal protein S10, chloroplastic	0.691222	9	0.0112989	0.0732394	0.92671	9	0.449355	0.753747	0.539994	9	0.00119988	0.0139418	0.737524	9	0.0389961	0.201349	1.20552	9	0.039996	0.191592	0.743993	8	0.00129987	0.0125794	1.13986	7	0.00509949	0.0570763	0.691447	9	0.00049995	0.00552399	0.765012	9	0.0579942	0.277219	0.782688	9	0.0260974
196	XP_002286526.1	362	30685.4	LSSGYEILSR;CVLGSAGCK;GAVYSYDAIGSFER;FFPYYSFNVLAGIDSEGK	1;1;1;1	4	9	133514;133515;175156;246003;246004;246005;246006;301812;348985	EED96167.1;EJK60845.1	predicted protein [Thalassiosira pseudonana CCMP1335]	0.953953	6	0.450855	0.752231	0.948521	9	0.414459	0.727219	0.745025	9	0.0232977	0.124836	0.725758	8	0.00069993	0.0114661	0.821739	8	0.00039996	0.00643507	0.700276	9	0.0001	0.0016362	1.03025	9	0.344566	0.724723	0.827805	8	0.00329967	0.0265299	1.19163	6	0.0183982	0.129797	0.896457	9	0.257574
197	XP_002287467.1	662	54228.2	VAPLVFAGEVR;GIGNPLGVK;AFSTGGFADISR;AVVWISDPVHGNTR	1;1;1;1	4	9	144171;144490;144493;144494;144495;166426;166427;166453;249451	EED94910.1	2-dehydro-3-deoxyphosphoheptonate aldolase-like protein [Thalassiosira pseudonana CCMP1335]	0.782258	9	0.0607939	0.241698	0.881623	9	0.0642936	0.311092	0.820999	9	0.252575	0.565077	0.923155	9	0.560444	0.852183	0.984384	9	0.839716	0.939496	1.36391	9	0.00569943	0.0362508	0.965715	9	0.627037	0.877706	1.43331	8	0.00039996	0.00461749	0.663507	9	0.00219978	0.0288862	0.671862	9	0.00219978
198	XP_002288886.1	173	80286.8	IIDYVAIGPR;VAVESGFPFVR;IWPAHVIK;DMIDDALLRPGR;TLLMVAEMAK;SDSGVSDSVVNQLLSK	1;1;1;1;1;1	6	9	131253;159910;159911;179168;207177;207178;216932;314560;314564	EED94322.1	predicted protein [Thalassiosira pseudonana CCMP1335]	0.882045	9	0.183882	0.465386	1.09034	8	0.0519948	0.280523	0.810995	8	0.0289971	0.143472	1.15837	9	0.0642936	0.279174	0.857063	8	0.0306969	0.157147	1.04005	9	0.644736	0.839265	0.942759	8	0.224278	0.597768	1.17067	9	0.150385	0.40391	0.94155	9	0.567443	0.856624	0.840194	9	0.0891911
199	XP_002289212.1	532	60093.5	HPFPGPGLAIR;THHNVGGLPASMK;IIGGTFIDIFQEEANK;LCYDISSKPPATIEWE	1;1;1;1	4	9	145347;145354;145356;145362;269911;269912;269917;331329;340079	EED92749.1	GMP synthase [Thalassiosira pseudonana CCMP1335]	0.973968	5	0.727727	0.902522	0.973751	9	0.760224	0.913034	1.21185	9	0.174483	0.466879	1.1147	9	0.290671	0.656829	1.17706	8	0.0969903	0.336756	1.62123	9	0.00659934	0.0404041	1.32432	8	0.0001	0.00367718	1.63855	9	0.00049995	0.00552399	0.578242	9	0.0118988	0.0926431	0.554434	9	0.00139986
200	XP_002289250.1	228	109139	AVIEAANNFPR;FFAGQMTAAGK;AQTYDVLSSQANIAGYR	1;0;1	2	9	158036;158037;158039;158040;158041;222133;225971;225982;304355;304356;304358;304359	EED92787.1	NNT NAD transhydrogenase, partial [Thalassiosira pseudonana CCMP1335]	0.790798	9	0.0550945	0.228011	0.856246	9	0.0358964	0.217065	0.572248	9	0.00629937	0.0480727	0.629154	9	0.00269973	0.0304057	0.626976	8	0.0001	0.00219734	0.728572	9	0.00189981	0.0162069	0.799052	9	0.00149985	0.0257403	0.859004	9	0.0857914	0.283316	1.17768	9	0.0360964	0.20485	0.966164	8	0.49525
201	XP_002289796.1	1366	16173.7	FANLDIR;ATLMAYDR;TATACAFAK;GGGFTAQIYAIR	0;1;0;1	2	9	56747;79615;79616;79617;79619;171450;171451;171452;171454;174354;174355;174359;174373;174423	EED93333.1	RS16, ribosomal protein 16 40S small ribosomal subunit [Thalassiosira pseudonana CCMP1335]	0.394112	9	0.00059994	0.00858009	0.493784	9	0.00069993	0.014666	0.264138	9	0.0009999	0.011926	0.326642	7	0.0001	0.00261133	0.71504	9	0.00769923	0.0566286	0.375299	9	0.00189981	0.0162069	0.674449	9	0.0069993	0.0733299	0.347959	9	0.00169983	0.0157804	0.887796	9	0.0857914	0.347233	0.956182	9	0.606139
202	XP_002290876.1	1052	95085.7	VLEIEGLPDLK;VPPGVDEAAYVK;MLVPDTVGTGGDSHTR;GHPLAYVGDVVGTGSSR;GGVSLRPGDGIIHSWLNR;IDEVFIGSCMTNIGHFR;EPVIEYLQSNVVMLK;LNKEPVIEYLQSNVVMLK	0;1;0;1;0;0;1;1	4	9	245049;245057;245058;245059;245065;245066;249109;249110;267903;267904;270946;270948;270950;273473;273478;273479;273506;313875;313880;313881;313884;320952;328249;328250;362417	EED92628.1	aconitase hydratase 2 [Thalassiosira pseudonana CCMP1335]	1.03681	9	0.511349	0.798326	1.10276	9	0.335866	0.685302	1.01702	9	0.749125	0.912091	1.09584	9	0.451555	0.787643	1.04685	8	0.378062	0.721491	1.03205	8	0.624238	0.828023	1.04139	9	0.423058	0.775295	1.12207	9	0.135286	0.382498	0.934174	8	0.208579	0.557475	0.954014	9	0.509549
203	XP_002291121.1	1217	17377.6	GIVGNIISR;MLGATNPLASEPGTIR;TYIMIKPDGVQR;KMLGATNPLASEPGTIR	1;1;0;1	3	9	76447;76448;76449;265083;265084;268101;268121;268130;283360;283361;283362;285938;329247	EED91228.1	nucleoside diphosphate kinase [Thalassiosira pseudonana CCMP1335]	1.50824	9	0.0212979	0.118453	1.2291	9	0.0313969	0.200628	1.38833	9	0.0385961	0.174215	1.14123	9	0.194681	0.537235	1.22977	9	0.0268973	0.140084	1.59444	9	0.00209979	0.0175796	1.05216	9	0.472653	0.811505	1.35074	9	0.0167983	0.0884613	1.21321	8	0.0164983	0.118722	1.24464	8	0.00929907
204	XP_002292510.1	77	40962.6	GCDLLVATPGR;MLDMGFEPQIR;TYPECLVLAPTR;DLMACAQTGSGK	1;0;1;1	3	9	144329;144330;198164;198167;198168;202223;202224;202225;202227;202229;202241;206287;219085;219089;219091;219092;219094;251193;251197	EED90485.1	predicted protein [Thalassiosira pseudonana CCMP1335]	0.695126	9	0.00069993	0.0095551	0.853612	9	0.00449955	0.0551577	0.613679	9	0.00019998	0.00360164	0.774091	8	0.00029997	0.00607355	0.887632	7	0.0161984	0.0966539	0.647411	9	0.0001	0.0016362	0.899561	9	0.167183	0.526686	0.721873	9	0.0001	0.00166743	1.08495	9	0.193481	0.535495	0.982955	9	0.755024
205	XP_002292920.1	1277	88438.1	ASPVQVVVTANAK;YWFEYTGPLQK;NLQEIDAMCATGLIAAR	1;1;1	3	9	257203;257205;257206;257207;285086;285089;305193;305195;305206	EED90116.1	predicted protein [Thalassiosira pseudonana CCMP1335]	1.0699	9	0.405159	0.716484	0.940608	8	0.255274	0.633615	1.07015	8	0.605439	0.847239	0.897151	7	0.0485951	0.23414	0.976651	9	0.479552	0.7929	1.22342	9	0.00249975	0.0197349	0.945194	9	0.313469	0.699543	1.28682	7	0.00129987	0.0124525	0.92021	8	0.0806919	0.339964	1.00412	9	0.962404
206	XP_002294422.1	337	87390.9	EVAAIAIGR;AGLGFAAFAELR;MSISNMAIEAGAR;HLVHEVTSPQAFEGLR;VADGVHAMVVPGSGLVK;RPDCTLSTVDHNVPTTDR;DIAPTVTWGTSPQDAMPVDGIVPR	1;1;0;1;0;1;1	5	9	69055;164653;164659;201826;298728;298734;298735;314669;329913;356301;356871	EED88256.1	3-isopropylmalate dehydratase [Thalassiosira pseudonana CCMP1335]	0.745932	7	0.0069993	0.050451	1.0379	9	0.693831	0.891914	0.486132	9	0.0001	0.00211861	0.848982	9	0.111689	0.38409	0.821363	9	0.0322968	0.164403	0.815483	8	0.00379962	0.0275779	1.00787	9	0.851915	0.961121	0.9678	9	0.709929	0.896621	0.956808	9	0.69933	0.920333	0.785725	9	0.10149
207	XP_002297308.1	1403	34986	SVQTLLR;FGPTNQILPASGR;YVATGLLPEFQQLDGR	1;1;1	3	9	49706;203726;203728;203729;296656;296666;296668;296673;332416	EED86379.1;EJK75937.1	predicted protein [Thalassiosira pseudonana CCMP1335]	1.06295	9	0.629037	0.861996	1.07786	7	0.0813919	0.361252	1.23568	9	0.118988	0.373341	1.15417	8	0.178082	0.511809	1.4199	9	0.00339966	0.0306309	1.34475	9	0.0528947	0.197123	1.131	9	0.191881	0.558593	0.994879	8	0.953505	0.98248	0.973766	9	0.705929	0.923726	1.17605	9	0.106389
208	AAB70098.1	168	20722.5	AVELNQGR;VSQLAFVGNLITR	1;1	2	8	65855;218624;218625;218626;218627;218628;218629;218631	-	fucoxanthin-chlorophyll a/c light-harvesting protein, partial [Skeletonema costatum]	0.560026	7	0.0001	0.00219734	0.731538	8	0.00429957	0.0541806	0.229771	7	0.0001	0.00211861	0.353521	8	0.0001	0.00261133	0.774811	8	0.0216978	0.119206	0.476673	8	0.00229977	0.0189022	0.808986	8	0.00769923	0.0788296	0.425119	7	0.00019998	0.00262893	1.79443	7	0.00029997	0.00719528	1.90861	7	0.00379962
209	ABK20818.1	781	13463.3	IVSLAPEVL;MIYPQTMLTVADNTGAK	1;1	2	8	79755;79756;79757;79758;79759;79766;79767;336227	YP_004072632.1;YP_009093512.1;AIR76185.1;AIR75496.1;AIR75637.1;ADB27585.1;sp|A0T0Y3.1|RK14_THAPS;YP_874595.1	50S ribosomal protein L14 (chloroplast) [Thalassiosira pseudonana]	0.830089	8	0.0821918	0.290411	0.959588	8	0.716128	0.901162	0.777311	8	0.133987	0.400182	0.90593	8	0.468353	0.79503	0.930192	8	0.348565	0.698681	0.65924	8	0.00279972	0.021816	0.73299	7	0.00019998	0.00621317	0.469432	8	0.0001	0.00166743	0.602858	8	0.009999	0.0813946	0.925641	7	0.19608
210	EED87992.1	1632	12541.1	GSVTGDITEVPGIGPAAAK	1	1	8	326120;326122;326124;326125;326126;326129;326130;326134	XP_002294632.1	predicted protein [Thalassiosira pseudonana CCMP1335]	1.08482	8	0.30017	0.613969	1.15054	8	0.060194	0.3008	1.10039	8	0.382862	0.698616	1.12619	7	0.0364963	0.194001	0.77067	7	0.00019998	0.00371509	0.676023	7	0.00059994	0.00638989	0.907083	7	0.0180982	0.141182	0.850117	7	0.0345965	0.148707	0.971997	6	0.645635	0.90642	0.782892	8	0.0977902
211	EED88926.1	945	24031.8	YILGGSGYFDVR;DLGICYWK;AGDLMTLPEGIYHR	1;1;1	3	8	200799;203921;203922;203924;254125;254130;306968;308834	XP_002293917.1	predicted protein [Thalassiosira pseudonana CCMP1335]	1.13542	7	0.0606939	0.241698	0.982995	8	0.788821	0.91766	1.89853	8	0.0079992	0.0573967	1.494	8	0.00479952	0.0462499	1.65179	7	0.00029997	0.00514806	1.86414	8	0.00189981	0.0162069	1.49224	8	0.00329967	0.042777	1.86024	8	0.00179982	0.0162888	0.609599	8	0.00639936	0.05965	0.603774	8	0.0049995
212	EED88939.1	773	42647	VGITDGFIR;DGLHGGMLWFDVK;YYDGLNIGTGGALIAK	0;1;1	2	8	90073;90074;121435;291935;291936;294605;313425;313427;313428;313429	XP_002293930.1	cystathionine beta-lyase [Thalassiosira pseudonana CCMP1335]	1.25398	8	0.0652935	0.252487	0.872106	8	0.020398	0.147619	1.81295	8	0.0167983	0.0985465	1.24595	8	0.0793921	0.313051	1.59441	8	0.00159984	0.0167611	1.94477	8	0.00239976	0.0194575	1.57667	8	0.00579942	0.0625782	1.97684	8	0.00309969	0.0254911	0.640564	8	0.009999	0.0813946	0.623632	8	0.0207979
213	EED89294.1	1600	28285.7	EIVALLGAHALGR;FNPEASWGANAGLDLPR	1;1	2	8	193924;193925;193926;193931;193932;297861;297865;297867	XP_002293558.1	predicted protein, partial [Thalassiosira pseudonana CCMP1335]	1.31324	8	0.0149985	0.0903923	1.12507	8	0.0993901	0.406021	1.65259	8	0.00069993	0.0090041	1.32465	7	0.00059994	0.010199	1.22001	8	0.0235976	0.12725	1.59316	8	0.00519948	0.0345353	1.16553	8	0.0747925	0.346151	1.5451	8	0.0336966	0.146588	0.933936	8	0.212079	0.558609	0.942047	8	0.635936
214	EED90008.1	922	50546	IAVMDSNR;GGFEAAIAK;GVTIQCNTK;STTCGHLIFK;LPISNIYNIK;VQPGDIIYVQK;YHYTIVDAPGHK;EHLSVVVCGHVDAGK;NMITGSATADVGLLLVPAEK	0;0;0;1;0;0;0;1;0	2	8	70389;70390;147364;147373;147391;147392;147402;147403;147406;147411;147414;147415;147416;195158;195159;195160;195161;195162;195163;195170;230593;230594;230600;230604;230609;230610;230611;233256;233265;233266;233272;233273;233274;233277;233279;233280;233281;233283;233284;233287;233289;233290;233291;233293;252374;279831;279840;279843;279845;279851;279853;279856;279857;279858;279860;279862;279863;27…	XP_002292812.1	translation elongation factor alpha [Thalassiosira pseudonana CCMP1335]	1.24793	7	0.00719928	0.0512771	0.64861	8	0.0216978	0.154644	1.39396	8	0.0374963	0.170964	0.754371	8	0.0409959	0.209194	1.08877	7	0.0956904	0.336129	1.31494	7	0.0613939	0.218246	1.62969	8	0.00029997	0.00772209	2.07053	7	0.00109989	0.01065	0.611013	8	0.00679932	0.0617777	0.374616	6	0.0001
215	EED90419.1	759	11659.5	AMPTFQFFK	1	1	8	219346;219357;219358;219365;223132;223135;223136;223144	XP_002292444.1	thioredoxin [Thalassiosira pseudonana CCMP1335]	1.17161	6	0.0406959	0.185656	0.857981	8	0.0680932	0.324614	1.84134	8	0.00059994	0.00806337	1.23418	6	0.00779922	0.0650657	1.15452	8	0.166683	0.462809	1.74168	7	0.00169983	0.0152224	1.00747	8	0.920408	0.982686	1.50675	7	0.00589941	0.0386358	0.652941	8	0.00179982	0.0252959	0.737127	8	0.0142986
216	EED93401.1	784	12876	AFLLEEQK	1	1	8	183481;183482;183485;183492;183494;183495;183499;183500	XP_002289864.1;EJK74030.1	RL34, ribosomal protein 34 60S large ribosomal subunit [Thalassiosira pseudonana CCMP1335]	0.369505	8	0.0001	0.00219734	0.625613	8	0.0001	0.00353298	0.271149	8	0.0001	0.00211861	0.458187	8	0.0001	0.00261133	0.548269	8	0.0001	0.00219734	0.281735	8	0.0001	0.0016362	0.713009	7	0.0001	0.00367718	0.340711	8	0.0001	0.00166743	1.0711	8	0.292971	0.662961	0.894237	6	0.126587
217	EED93535.1	1319	17139.3	TPPSWCK;GLTPSQIGVILR;KGLTPSQIGVILR	1;1;1	3	8	151038;174635;174636;174641;276173;276174;276175;276176	XP_002289998.1	RS13, ribosomal protein 13 40S small ribosomal subunit [Thalassiosira pseudonana CCMP1335]	0.554735	8	0.0231977	0.124411	0.88428	6	0.150285	0.510007	0.399904	8	0.0146985	0.0912829	0.653658	8	0.0568943	0.260009	0.761861	8	0.00059994	0.00864873	0.581757	8	0.0826917	0.261448	0.91885	8	0.620238	0.877706	0.705215	8	0.446655	0.736654	1.16854	8	0.00579942	0.0554955	0.980072	8	0.883112
218	EJK45846.1	984	22879.2	AAMIAMASLFAMK	1	1	8	277311;277316;277320;277324;277327;280348;280349;280352	XP_002290280.1;EED92032.1	hypothetical protein THAOC_35518 [Thalassiosira oceanica]	0.708957	7	0.00589941	0.044667	1.09187	8	0.0859914	0.369825	0.548715	7	0.00139986	0.0154672	0.874823	7	0.0989901	0.355698	0.875919	8	0.194081	0.504666	0.629461	8	0.00349965	0.0261385	0.869195	8	0.0738926	0.346151	0.615305	8	0.00039996	0.00461749	1.28914	7	0.00239976	0.03019	1.44265	8	0.00149985
219	EJK49309.1	130	65064.7	LFLAGADVFR;GVNTPDSILEISCLTPK;IVELCDGIMVAR;YDHPIAILGDLQGPK	1;1;1;1	4	8	128690;128693;128694;196826;208210;208211;314767;314773	-	hypothetical protein THAOC_31830 [Thalassiosira oceanica]	1.87721	8	0.00089991	0.0113401	1.48603	8	0.00919908	0.0891223	2.28405	8	0.0001	0.00211861	1.982	7	0.0001	0.00261133	1.28483	7	0.00029997	0.00514806	1.93752	8	0.00219978	0.0181633	1.01416	8	0.826117	0.960313	1.31697	7	0.00109989	0.01065	1.22296	8	0.170283	0.503315	1.60106	8	0.040496
220	EJK52355.1	242	71680.8	DAGAISGLNVLR;ITITNDKGR;NTTVPAKK;TTPSYVAFTETER;ALEGIAMPILQK;MVDYFLQDFK;NGLENYCYSLK;FEDLCMDYFK;NAVVTVPAYFNDSQR;IINEPTAAAIAYGLDK;TQTFSTYADNQPGVLIQVFEGER;KTQTFSTYADNQPGVLIQVFEGER	0;0;0;0;1;0;0;0;0;1;0;0	2	8	152985;152986;152990;152993;194491;230434;238326;238327;296466;296475;260383;260388;260389;261547;264632;264633;264634;264638;272032;272034;272039;272051;273392;273406;273407;273411;273412;318695;275125;275131;275132;275133;317355;317359;317360;317361;317364;358905;358906;358908;358909;358911;358912;358914;358917;358918;358919;358920;358921;365340;365341;365342;365343;366491;366492;366493	EJK51576.1	hypothetical protein THAOC_28380 [Thalassiosira oceanica]	0.982513	8	0.857114	0.960522	0.847124	8	0.208979	0.582598	1.04428	8	0.462054	0.757196	0.898086	8	0.337966	0.695223	1.07105	8	0.319368	0.673733	0.804327	8	0.0546945	0.200509	0.904133	6	0.0723928	0.344675	0.737457	7	0.0358964	0.151404	0.806321	8	0.311469	0.688187	0.967077	8	0.825117
221	EJK53101.1	397	37241.3	IVLVIPSFGER;LESSNPANSVK;LILTMPESMSMER	1;0;0	1	8	166881;166882;166883;166884;166885;166888;166889;166890;226355;226356;226359;226367;226372;246629;246631;246632;250027;250029;250035;250038;250051;250063;253434;253435;253437;253438;253449;256544	-	hypothetical protein THAOC_27524 [Thalassiosira oceanica]	1.34249	8	0.0322968	0.15772	1.15505	7	0.0059994	0.0643507	1.05203	7	0.575142	0.836843	0.952634	8	0.614239	0.876962	1.34189	7	0.00079992	0.0102961	1.7407	7	0.00059994	0.00638989	1.0305	8	0.411959	0.767531	1.26657	8	0.0440956	0.177665	0.948647	8	0.490851	0.822198	1.11938	8	0.155484
222	EJK55038.1	188	21290.7	YVEIKHGR;AAMMGILGLMVHEQLGGELPIVGAM	0;1	1	8	190394;357936;357962;357963;358516;358519;358522;358525;358996	-	hypothetical protein THAOC_25270 [Thalassiosira oceanica]	0.831375	9	0.221478	0.516304	0.916701	9	0.329067	0.685302	0.729464	6	0.00439956	0.0370262	0.767129	8	0.00329967	0.0353929	0.975848	8	0.736226	0.91868	0.817388	8	0.0184982	0.0922345	0.958067	9	0.633937	0.87856	0.936192	7	0.455554	0.743838	1.32652	9	0.166183	0.49994	1.24762	9	0.175682
223	EJK65530.1	703	27101.3	VIEALEQK	1	1	8	168138;168148;168149;168150;168151;168152;168155;168156	EED88772.1;XP_002293763.1	hypothetical protein THAOC_13594 [Thalassiosira oceanica]	0.920988	8	0.0861914	0.298113	0.824407	8	0.00169983	0.0288971	0.554257	8	0.0001	0.00211861	0.502888	8	0.0001	0.00261133	0.56411	7	0.0001	0.00219734	0.390523	8	0.0001	0.0016362	1.06962	8	0.0959904	0.395823	0.691854	7	0.00019998	0.00262893	2.15707	8	0.0001	0.0035271	1.23792	8	0.0019998
224	EJK66713.1	650	59624.8	VPMVCSGK;DGQYAYGVFK;IYELCDVGHK;SISELMTNIIEK;GKDGQYAYGVFK;HLACLALNNLSIPTENK;HLACLALNNLSIPTENKR	0;0;0;1;0;0;0	1	8	151632;156626;156629;156635;156641;156642;156643;156644;156664;226712;226713;226720;288360;246673;246676;246691;246692;246697;246698;275450;278534;278535;278541;278544;278545;278546;278548;314762;314763;340052;349460	-	hypothetical protein THAOC_12343 [Thalassiosira oceanica]	1.14484	29	0.0001	0.00219734	1.09899	30	0.00619938	0.0661023	1.43249	31	0.0001	0.00211861	1.40485	31	0.0001	0.00261133	1.02033	31	0.59834	0.862689	1.05782	31	0.154385	0.394684	1.0961	30	0.00239976	0.0343204	1.17202	31	0.0001	0.00166743	0.781407	31	0.00169983	0.0248617	0.704339	31	0.0001
225	EJK66758.1	947	35771.6	VELWLGPIR;NLPLQQIQGGNSR	1;1	2	8	120815;120818;120823;120831;120832;120833;220282;220294	-	hypothetical protein THAOC_12288 [Thalassiosira oceanica]	2.06822	8	0.00049995	0.00763483	1.49046	8	0.00039996	0.0105989	1.41211	8	0.0429957	0.186142	0.994431	7	0.956504	0.987138	1.10792	7	0.0318968	0.162827	2.03362	8	0.00019998	0.00281222	1.1111	6	0.0289971	0.193529	2.31084	7	0.0001	0.00166743	1.28586	8	0.00079992	0.013576	1.22364	8	0.0243976
226	EJK71614.1	644	40334.3	EAFVELCNSK;VQGNNPLDDIK;LLGETIGCLIK;MALVGDAAGYVTK;VEAHPIPEHYRPR;AMDAGEYNFAIAFQER;LYGPTYTVLDILQK;KVQGNNPLDDIK;YVQQVTFDSYLYK;YDHVGVGTGTVVNRPAIK;LISPTNVEVDIGDTLQPNEYIGMCR	0;0;0;0;1;0;0;0;0;0;1	2	8	238151;241962;241963;241966;242915;242921;242922;242923;259534;259535;259536;259537;259538;259548;262719;259682;259703;300757;300758;300759;300760;313161;313164;313168;315632;316636;316645;338312;364179;364180;364181;364182;364413;364414	-	hypothetical protein THAOC_06923 [Thalassiosira oceanica]	0.890774	34	0.00379962	0.0337286	0.982867	34	0.634337	0.865966	0.98806	33	0.807019	0.929905	1.07443	34	0.080292	0.314535	1.27408	31	0.0001	0.00219734	0.863992	32	0.0001	0.0016362	0.980231	33	0.358564	0.735914	0.646693	33	0.0001	0.00166743	0.663318	34	0.0001	0.0035271	0.853957	33	0.00239976
227	EJK72068.1	1298	59407.2	SMGSTVSAVLATAFK;DGFCIAGGGGVVVLEELEHAK;AMSNSFGFGGTNCALVFDKYEE	0;1;0	1	8	293778;293780;353822;353823;353825;353826;353827;353829;353830;353831;362532;362847	-	hypothetical protein THAOC_06442 [Thalassiosira oceanica]	1.3305	8	0.00049995	0.00763483	1.21805	8	0.0139986	0.115713	1.37217	7	0.00149985	0.0163711	1.27882	7	0.00059994	0.010199	1.32855	8	0.00019998	0.00371509	1.19584	8	0.00619938	0.0388811	1.17196	6	0.0049995	0.0563069	1.16122	7	0.040296	0.166071	1.01078	8	0.879112	0.975156	1.10516	8	0.266073
228	EJK74044.1	1430	22241.7	FLDLSVGSR;SNNLETVESELLAIK;RGEVEATIISAEPLNK	0;1;1	2	8	94777;94778;317341;317342;317344;317345;317346;317347;324869;324870	-	hypothetical protein THAOC_04305 [Thalassiosira oceanica]	0.810502	8	0.0737926	0.273048	0.802667	8	0.0156984	0.125171	0.638234	8	0.00059994	0.00806337	0.640919	8	0.00029997	0.00607355	0.839725	8	0.130287	0.393206	0.858985	8	0.0290971	0.126509	0.952206	8	0.520348	0.825161	1.0486	7	0.510649	0.78204	1.19621	8	0.0440956	0.231953	1.05719	7	0.345065
229	EJK77148.1	699	30876.5	LGMDTSGLVVFAR	1	1	8	205622;205623;205624;205632;209615;209616;209627;209640	EJK46456.1;XP_002293927.1;EED88936.1;XP_002293926.1;EED88935.1	hypothetical protein THAOC_01040 [Thalassiosira oceanica]	1.26544	8	0.079592	0.284573	1.17856	8	0.0117988	0.104223	1.22771	7	0.0650935	0.248376	1.03832	8	0.70193	0.903334	1.0444	8	0.479652	0.7929	0.956745	8	0.549045	0.78125	0.949053	8	0.414859	0.767531	0.870204	8	0.0350965	0.14915	1.04929	8	0.49625	0.824404	1.1481	8	0.0792921
230	XP_002287026.1	963	28487.1	HLGLNYDER;DIADIVAGSGNK;ILPSLMNECAK	1;1;0	2	8	219329;229529;229530;229542;229543;229548;229549;229550;255480;255488	EED96667.1	predicted protein, partial [Thalassiosira pseudonana CCMP1335]	0.560286	8	0.00059994	0.00858009	0.521581	8	0.00109989	0.020433	0.538936	8	0.00019998	0.00360164	0.449394	7	0.0001	0.00261133	0.743564	8	0.0174982	0.10271	0.692259	7	0.00169983	0.0152224	0.825079	8	0.00029997	0.00772209	0.715477	8	0.0001	0.00166743	0.799417	8	0.0274973	0.169409	0.71174	6	0.00119988
231	XP_002287079.1	838	29905.7	AVENAGTALGLR	1	1	8	148581;148582;148583;148584;148585;148586;148587;148602	EED96720.1	proteasome subunit alpha type 3 [Thalassiosira pseudonana CCMP1335]	1.23231	7	0.0173983	0.100809	1.16486	8	0.0536946	0.284804	0.955235	7	0.49985	0.782809	1.04667	6	0.469553	0.79503	0.920891	8	0.0923908	0.328379	0.979509	8	0.694231	0.871063	0.951005	8	0.284972	0.669516	0.951729	7	0.387361	0.687634	0.900712	7	0.0694931	0.307611	0.881133	7	0.0485951
232	XP_002288567.1	241	70445.5	FELTGIPPAPR;IINEPTAAAIAYGMDK;DAGTISGMK;VMQYFIK;STAETFLGK;EVENIANPIMR;NGLESYLYNLK;NAVVTVPAYFNDAQR;QKEVENIANPIMR;NQATINPENTVFDVK	0;0;0;0;1;0;0;0;0;0	1	8	27415;27423;156706;156711;156712;156713;156714;156727;156730;156732;156733;156734;156735;156736;156737;156739;156742;156743;156744;156747;156750;156751;156752;156753;156754;156755;156756;156757;156758;156759;156760;156761;156763;156803;54715;319468;319471;319472;319473;319476;319483;321216;321218;321221;321222;321226;321229;321231;152304;152307;152311;152312;152313;167725;172778;175844;175851;175…	EED94003.1	heat shock protein/chaperone [Thalassiosira pseudonana CCMP1335]	1.13669	8	0.0520948	0.219334	0.900924	7	0.128787	0.465079	1.19028	8	0.10179	0.338235	0.885808	8	0.380662	0.723579	0.819337	8	0.0258974	0.136454	0.891752	8	0.220878	0.484263	0.821814	8	0.0207979	0.156158	0.893906	8	0.122388	0.359576	0.743774	7	0.00059994	0.011361	0.767337	6	0.00559944
233	XP_002289278.1	328	51880.8	LGLFGLDK;VAIMPGSGTFGMEAVAR;GGFGYHTTMPTDGLR	1;1;0	2	8	24571;147052;277641;277647;277648;277650;280628;283408;311362;313364	EED92815.1	predicted protein [Thalassiosira pseudonana CCMP1335]	1.55947	7	0.0001	0.00219734	1.09272	8	0.408859	0.724448	1.42229	8	0.0136986	0.0862631	1.06096	8	0.356564	0.70667	1.23565	8	0.0019998	0.0199096	1.16169	6	0.0634937	0.219633	1.10089	7	0.0188981	0.146156	0.995039	7	0.933607	0.980633	1.18066	8	0.0972903	0.372394	1.333	8	0.00929907
234	XP_002289356.1	1025	28555.1	GTFIEFR;SGMMNISPIGR;ITVGIVGGSDLPK;YLADVDIPVKR;IIALFDVDGTLTIPR	1;1;1;1;1	5	8	61623;145517;150626;251541;251543;251544;258079;268225	EED92893.1	phosphomannomutase [Thalassiosira pseudonana CCMP1335]	1.21258	8	0.0079992	0.0550174	0.903743	8	0.0838916	0.365151	1.82311	7	0.0001	0.00211861	1.29551	6	0.00259974	0.0298391	1.78629	8	0.0001	0.00219734	2.03226	8	0.0001	0.0016362	1.29737	8	0.0105989	0.100523	1.49842	6	0.00029997	0.00377794	0.589239	7	0.00049995	0.0097762	0.840418	8	0.10039
235	XP_002289774.1	815	84327.2	VSGAIGPVTSLGK;MSFDQEAAAVLLAR;FLLPVSECAMTLESILDDLR	1;1;1	3	8	235824;235825;243032;243034;243035;246656;246659;347999	EED93311.1	hypothetical protein THAPSDRAFT_22248 [Thalassiosira pseudonana CCMP1335]	0.790413	8	0.0132987	0.0829211	0.890372	7	0.0192981	0.142675	0.644278	8	0.00889911	0.0616435	0.704579	8	0.00619938	0.0553034	0.771702	8	0.00089991	0.0111837	0.813442	7	0.00789921	0.0464659	0.927839	7	0.112289	0.434602	0.984011	8	0.80182	0.927474	1.34526	8	0.00559944	0.0538684	1.16727	7	0.113289
236	XP_002290729.1	160	90179.9	AMLGSVER;FADFGVLHR;NELSGALSGLTR;MFAVLCEHYGGK;LHAEGFYADVDLSK	1;1;0;1;1	4	8	59967;59981;114298;114312;114313;114319;163009;163017;281718;306052	EED92481.1	predicted protein [Thalassiosira pseudonana CCMP1335]	0.962272	8	0.69773	0.886359	0.954173	7	0.260174	0.638561	0.867353	8	0.324768	0.654862	0.765991	7	0.0279972	0.161246	0.740333	7	0.0001	0.00219734	0.959888	7	0.494751	0.749622	1.01106	8	0.786321	0.94716	1.32674	8	0.00019998	0.00262893	0.762439	8	0.0848915	0.346303	0.578153	8	0.00259974
237	XP_002290941.1	811	19588.1	STIGVEFATK;IVLLGDSGVGK;GAVGALLVYDVTDR;DCLIMLVGNK	0;1;1;1	3	8	203571;203572;203579;204814;204815;204817;226051;226058;287975;230305;230308	EED91048.1;EJK68942.1	predicted protein, partial [Thalassiosira pseudonana CCMP1335]	1.74879	8	0.00029997	0.00505183	1.32883	6	0.00049995	0.0123412	1.51274	8	0.00789921	0.0569059	1.18183	8	0.0683932	0.290671	1.01619	8	0.821818	0.93268	1.70086	6	0.0001	0.0016362	1.00508	8	0.922008	0.982686	1.64872	7	0.00039996	0.00461749	1.27699	8	0.030297	0.180478	1.29216	8	0.0737926
238	XP_002291807.1	1435	45548.1	DVYIASQLVGEK;VFPVCGNTYNMLK	1;1	2	8	264748;264750;264751;264754;264758;264759;313450;303032	EED90658.1	methyltransferase [Thalassiosira pseudonana CCMP1335]	1.27561	8	0.00049995	0.00763483	1.02713	8	0.754825	0.912141	1.27787	8	0.0163984	0.0971495	1.08617	7	0.120888	0.403328	0.912955	6	0.0963904	0.336756	1.11036	8	0.242076	0.51384	0.980901	7	0.649135	0.886043	1.24457	8	0.0244975	0.116412	0.888298	8	0.0528947	0.259285	0.747971	7	0.00079992
239	XP_002293738.1	1582	66710.9	SGLMVADEIIAR;EFDAVVCALDVPGIK;DLDDITFTEWFTQLGGSR	1;1;1	3	8	181173;181177;181178;181208;314260;314261;331455;331460	EED88747.1	predicted protein [Thalassiosira pseudonana CCMP1335]	0.797247	7	0.0378962	0.17555	1.18559	8	0.069793	0.329785	1.02439	8	0.80482	0.929154	1.53161	7	0.0001	0.00261133	1.1663	8	0.00869913	0.0614739	1.05818	8	0.552245	0.78361	0.931209	8	0.0446955	0.257321	0.818017	8	0.0291971	0.132453	0.97201	8	0.711929	0.927785	1.2137	8	0.00519948
240	XP_002295048.1	1120	43714.6	IQNMGFVR;SANDIPGNLYNVK;ISSSGVSGASYFTGSIVNEQR;DDNEVWAVGGSNTMYVSK;VPFEDTVYDIDFDSPTHGYIVGAR	0;0;0;1;1	2	8	86378;86383;90906;280528;280532;280533;335257;335258;353337;344309;361842;361845;366371;366372;366373;366375;366376	EED87828.1	predicted protein [Thalassiosira pseudonana CCMP1335]	1.49637	8	0.00019998	0.00367718	1.53538	7	0.0001	0.00353298	1.5657	8	0.00359964	0.0324148	1.55359	8	0.0049995	0.0476672	1.43423	7	0.00409959	0.0350117	1.81841	8	0.0009999	0.0100549	1.02031	8	0.823218	0.95942	1.53156	7	0.00079992	0.00809357	0.839293	7	0.0386961	0.214198	1.15888	8	0.138986
241	XP_002295597.1	854	51872.5	VILTASGGAFR;ITLDSATMMNK;EDVGLGFLDIPK;ETLISGGPVINPLVEK;QGGTMTAVLNAANEAANEMFR	1;1;1;1;1	5	8	123338;244676;248215;260981;260984;260985;318135;338898	ACI64314.1	1-deoxy-D-xylulose 5-phosphate reductoisomerase [Thalassiosira pseudonana CCMP1335]	1.23287	7	0.0325967	0.158755	1.06542	7	0.121588	0.449717	1.33884	8	0.069693	0.256157	1.20083	8	0.00179982	0.0222142	1.54129	8	0.00049995	0.00763483	1.26688	8	0.00749925	0.0446975	1.0337	8	0.691331	0.895599	0.845151	8	0.0626937	0.228566	0.831396	8	0.0386961	0.214198	1.21332	8	0.0380962
242	XP_002296128.1	447	49585.8	GTSFGAPCALENELAK;VIGGGLPVGAYGGK;FTNSGTEACMGMIR;ATLCAEYNNLDAVK;GVYLAPSMYEAGFMSMSHTDEDIER	1;0;0;1;1	3	8	161053;317926;317936;249138;249139;254500;260900;307961;307964;307968;307969;367400	ACI64845.1	predicted protein [Thalassiosira pseudonana CCMP1335]	0.774351	8	0.0362964	0.172575	1.01848	8	0.748325	0.911753	0.856899	8	0.20398	0.508819	1.14001	8	0.116388	0.394988	1.34763	7	0.00069993	0.00941249	1.36897	8	0.0326967	0.137189	1.01968	8	0.694731	0.898711	0.984483	8	0.866513	0.961647	0.673424	8	0.0039996	0.0425756	0.855575	7	0.0210979
243	AAO43933.1	1778	23094.2	CTIQMPSGEFQR;FSVSGDLGTGNVLVR;DMQVLGDTATISCTK	1;1;1	3	7	227143;227145;242826;242829;242830;314993;315001	-	proliferating cell nuclear antigen, partial [Skeletonema costatum]	1.08703	7	0.260074	0.569445	1.06277	7	0.532047	0.812499	0.987936	7	0.866513	0.946303	1.05792	6	0.447255	0.787157	0.998918	6	0.982402	0.993376	0.734265	7	0.00379962	0.0275779	1.07085	7	0.0723928	0.344675	0.853608	6	0.0347965	0.148856	1.01074	6	0.90181	0.979117	0.821808	7	0.178882
244	ADB27544.1	1061	17353.3	EAQLEIANSQNIHK;KEYILSHLAEASEK	1;1	2	7	309577;309585;309592;309593;309594;341100;341101	YP_004072590.1	ATP synthase CF0 subunit II B' chain (chloroplast) [Thalassiosira oceanica CCMP1005]	0.669351	7	0.0120988	0.0764983	0.726479	7	0.0167983	0.132186	0.590517	7	0.00229977	0.023269	0.628907	7	0.00579942	0.0519928	1.07797	7	0.355164	0.704853	0.336998	7	0.0001	0.0016362	1.09458	7	0.134187	0.470146	0.348498	7	0.0001	0.00166743	1.08576	7	0.323468	0.700638	1.0627	7	0.374163
245	ADB27549.1	150	82157.9	FSQALAQDPATR;DFGYSFPCDGPGR;DKPVALSIVQAR	1;1;1	3	7	189896;232108;232109;232110;232111;259781;259784	AIR76081.1;EED86194.1;YP_009093136.1;ABK20714.1;sp|A0T0M9.1|PSAB_THAPS;AIR75533.1;XP_002297554.1;YP_009093408.1;YP_874491.1;AIR75809.1;YP_004072596.1;AIR75392.1	photosystem I P700 chlorophyll a apoprotein A2 (chloroplast) [Thalassiosira oceanica CCMP1005]	0.447146	7	0.0001	0.00219734	0.629859	7	0.00019998	0.00621317	0.312581	7	0.0001	0.00211861	0.441437	7	0.00029997	0.00607355	0.647854	7	0.00109989	0.0130395	0.647729	7	0.00019998	0.00281222	0.735516	7	0.00029997	0.00772209	0.716939	7	0.00249975	0.0213367	1.5486	7	0.00119988	0.0189349	1.42795	7	0.00929907
246	AFM78112.1	921	33937.8	EPTLPVR;GGFEAAIAK;LPISNIYNIK;SDKCPWYK;YHYTIVDAPGHK;FNEIKEEFVK;NMITGSATADVGLLLVPAEK;GVGQIICGTVEQGTLLPGDVIGICPSGLK	1;0;0;1;0;0;0;1	3	7	48678;147364;147373;147391;147392;147402;147403;147406;147411;147414;147415;147416;233256;233265;233266;233272;233273;233274;233277;233279;233280;233281;233283;233284;233287;233289;233290;233291;233293;277333;279831;279840;279843;279845;279851;279853;279856;279857;279858;279860;279862;279863;279864;279878;279887;279888;279913;322524;322528;322530;322531;322532;322534;322535;322537;308612;308625;3…	-	translation elongation factor-like protein, partial [Skeletonema costatum]	0.818243	6	0.0108989	0.0714176	0.840293	7	0.157084	0.520342	0.602792	6	0.00029997	0.00478094	0.590125	6	0.00029997	0.00607355	0.740087	7	0.0534947	0.236849	0.888492	6	0.121888	0.34068	1.01241	6	0.90381	0.979943	1.22989	7	0.129287	0.371958	0.747413	5	0.00469953	0.0474969	0.644167	6	0.0325967
247	AIR75422.1	84	169203	NFEIIPNIR;GLMADPSGEIMR;LIDIAQDIIIR;EITGDIVQGLPR;GEVIGLLNFEK;EGLTITDYLMSGYGAR;AALNNPSFISAASFQETTR	1;1;1;1;1;1;1	7	7	130940;181780;183781;188202;243306;286848;324093	AIR75563.1	RNA polymerase beta' subunit (chloroplast) [Cyclotella sp. L04_2]	0.741607	7	0.0790921	0.284064	0.812544	6	0.0113989	0.102704	0.674275	7	0.0571943	0.23044	0.758351	6	0.0151985	0.107825	0.839101	7	0.0110989	0.072728	0.677592	6	0.00809919	0.0473329	0.886608	7	0.112189	0.434602	0.71701	6	0.0367963	0.154117	0.859352	7	0.334967	0.704801	0.81938	7	0.241376
248	AJO54223.1	14	46878.6	AGNSTYAR;VALEAMVLA;DTDVLALFR;VVYEGLK;ASAATGEVK;IPHSYLK;AVAALRLEDMR;EDDMILHLHR;YESGVIPYAK;GGLDFLKDDENINSQPFMR;GGLDFLKDDENINSQPFMRWR	0;0;0;0;0;0;0;1;0;0;0	1	7	54669;54670;77407;77408;77419;110836;110853;110854;110855;110856;110867;110868;110871;110873;110874;110880;110881;110882;110883;110884;110885;110886;110888;110889;110890;110891;110892;110893;110895;110896;110897;110898;129749;129778;129784;137794;137799;137802;137805;137809;137813;145418;171482;182389;182392;182393;182398;182401;182405;187285;221651;221660;221661;221662;221674;221676;221678;22167…	-	ribulose-1,5-bisphosphate carboxylase/oxygenase large subunit, partial (chloroplast) [Cyclotella meneghiniana]	1.81149	10	0.00369963	0.0337286	0.935286	10	0.70013	0.89478	2.43247	10	0.0009999	0.011926	1.22885	10	0.313969	0.677191	1.53944	9	0.00349965	0.031375	1.25205	10	0.158184	0.400466	1.90925	10	0.0112989	0.103353	1.51553	10	0.10319	0.320422	0.993432	10	0.963504	0.991048	0.82313	10	0.507049
249	EED88221.1	1037	14480.2	GWTEAMQLMK;EEGVVTLPSGLLYK;GKEEGVVTLPSGLLYK	1;1;1	3	7	241473;241474;241486;245138;297046;345792;345794	XP_002294387.1	predicted protein, partial [Thalassiosira pseudonana CCMP1335]	1.2267	7	0.00459954	0.0381953	0.774211	7	0.0356964	0.217065	1.50254	6	0.00079992	0.0100046	0.838481	6	0.0167983	0.115537	1.0616	6	0.250575	0.588939	0.980269	6	0.785321	0.921023	1.08625	7	0.383962	0.755158	1.03872	7	0.750125	0.90814	1.04272	7	0.756224	0.942616	1.22101	6	0.170683
250	EED88227.1	1144	60898.7	VIADGFDIAR;MLVGGAGQIK;GIDPLSLDIFAK	1;1;1	3	7	118858;118862;118872;118873;182288;258071;258075	XP_002294393.1	t-complex protein 1 zeta subunit [Thalassiosira pseudonana CCMP1335]	0.917662	7	0.376562	0.70046	0.994163	7	0.883412	0.957156	1.06746	7	0.629237	0.862318	1.15983	7	0.0878912	0.332033	0.819751	7	0.00749925	0.0560732	0.737111	7	0.0171983	0.0876966	0.944425	7	0.179982	0.536079	0.852594	7	0.124088	0.362795	0.917393	7	0.605439	0.889858	0.800514	7	0.238776
251	EED88228.1	1457	20824.6	ILILGLDNAGK;GALNAQQISDALGLPEVR	1;1	2	7	221755;221758;221759;303745;303757;303758;303760	EJK75650.1;XP_002294394.1	adp-ribosylation factor 1 [Thalassiosira pseudonana CCMP1335]	0.913863	7	0.150585	0.425988	0.986591	7	0.875112	0.953168	0.832486	7	0.152785	0.437465	0.908634	7	0.405359	0.751685	0.81163	7	0.0919908	0.328252	0.709458	7	0.0224978	0.105184	0.928916	7	0.356964	0.734303	0.806932	7	0.029897	0.134276	1.32462	6	0.00249975	0.0308017	1.11018	7	0.360864
252	EED88448.1	125	52766.9	VLVFVETK;EGVEIVIATPGR;NTVVYGGVPK;NMVGISATGSGK;SCQATLLVATDVAAR	1;1;1;1;1	5	7	169718;169719;170249;198639;220556;224414;254770	XP_002294093.1	atp-dependent RNA helicase [Thalassiosira pseudonana CCMP1335]	0.622433	7	0.00379962	0.0337286	0.668511	7	0.0029997	0.0403393	0.598311	5	0.00059994	0.00806337	0.653805	7	0.00029997	0.00607355	0.896432	7	0.0979902	0.338922	0.848694	7	0.0214978	0.101832	0.919206	7	0.172083	0.53237	0.863039	7	0.0735926	0.256364	0.791195	7	0.167183	0.501271	0.775251	7	0.207179
253	EED88727.1	1095	48331.3	WDPFYADAR;HQLETFK;SFECFVDACR;GAGVVALTMFDLR	1;1;1;1	4	7	138577;138580;159639;185942;201666;201668;205615	XP_002293718.1	predicted protein [Thalassiosira pseudonana CCMP1335]	1.58209	7	0.00719928	0.0512771	1.57546	6	0.0009999	0.0191683	1.15993	7	0.39536	0.707797	1.10946	7	0.276172	0.639669	0.967447	7	0.605039	0.868058	1.44346	7	0.0746925	0.243448	1.04134	7	0.516948	0.823234	1.66191	5	0.00019998	0.00262893	1.26635	7	0.0290971	0.176248	1.18139	7	0.254475
254	EED89327.1	87	30581.5	LIIAGAPASGK;LVPDEVIIGVVK	1;1	2	7	189353;189354;189355;189356;256533;256534;256535	XP_002293591.1;EJK62708.1	predicted protein [Thalassiosira pseudonana CCMP1335]	1.64287	6	0.0001	0.00219734	1.76498	7	0.00059994	0.0138602	1.90067	7	0.00019998	0.00360164	2.21216	7	0.00029997	0.00607355	1.65092	7	0.00069993	0.00941249	1.54728	7	0.00439956	0.0305761	1.39737	7	0.00209979	0.0310149	1.45944	6	0.00049995	0.00552399	0.812687	7	0.0829917	0.342515	0.927099	7	0.370663
255	EED90927.1	718	69638.1	DFSSTISR;LLGQFELSGIPPAPR;NQLEAYLYNLK;VINEPTAAAIAYGLDK;SQVFSTYADNQPGVNIQVFEGER	1;1;1;1;1	5	7	72242;258463;258489;273754;315771;358469;358470	XP_002292076.1	luminal binding protein, partial [Thalassiosira pseudonana CCMP1335]	0.87532	6	0.0577942	0.232987	1.08773	6	0.0950905	0.394744	0.805789	7	0.164184	0.454216	1.02377	7	0.847415	0.950588	0.833324	7	0.00859914	0.0614739	0.893595	7	0.433557	0.70497	0.905308	7	0.0527947	0.284839	0.915668	7	0.521048	0.789905	1.22782	7	0.0725927	0.316209	1.14956	5	0.128887
256	EED91544.1	1130	37612.7	GPAILQVHTYR;AEQDPIKK;GFENACNQQYMQGK;STYFQGGWALVSEQLPYAAGAAK	1;1;1;1	4	7	174895;174896;174901;174902;246560;319135;361958	XP_002291437.1	predicted protein, partial [Thalassiosira pseudonana CCMP1335]	1.12708	7	0.168183	0.4522	0.9997	7	0.9966	0.9986	1.45	7	0.00889911	0.0616435	1.19729	6	0.0326967	0.178005	1.45923	5	0.00039996	0.00643507	1.32734	7	0.0430957	0.169441	1.48317	7	0.0149985	0.123926	1.44472	7	0.0386961	0.160951	0.880398	7	0.271073	0.634974	0.809391	7	0.184582
257	EED91557.1	1424	43183.5	SLADAMTASVLDSCGFSAK	1	1	7	341678;341679;341680;341681;341682;342773;342774	XP_002291450.1	predicted protein [Thalassiosira pseudonana CCMP1335]	1.83484	7	0.00019998	0.00367718	0.890733	7	0.149885	0.509609	1.4828	7	0.0165983	0.0980118	0.722391	7	0.0176982	0.118558	0.860981	7	0.0466953	0.214109	0.760582	6	0.00829917	0.0478798	0.960918	7	0.653135	0.886717	0.808728	5	0.0258974	0.120832	1.78762	7	0.00039996	0.00827044	1.61854	7	0.00229977
258	EED91716.1	1567	43155.7	DLVIQYSVK;FAEETFFK;DGCTHVGFELWQVK	1;1;1	3	7	48695;194686;194687;194690;319252;319253;319255	XP_002291609.1	calreticulin-like protein, partial [Thalassiosira pseudonana CCMP1335]	1.17673	6	0.0278972	0.140421	1.03399	6	0.750725	0.912141	1.55189	7	0.0110989	0.0732202	1.15996	7	0.105589	0.37016	1.28126	7	0.00409959	0.0350117	1.31549	7	0.0143986	0.0742619	1.29952	7	0.00049995	0.0111223	1.36276	7	0.00539946	0.036696	0.826508	7	0.122888	0.430107	0.794175	7	0.0412959
259	EED92502.1	822	32673.8	HYGGLQGLNK;FMPVWENEIAPAIK;EAGFTFDVAYTSVLK	0;1;1	2	7	211958;315611;315612;315613;315614;317457;315930;315931	XP_002290750.1	phosphoglycerate mutase [Thalassiosira pseudonana CCMP1335]	1.39933	5	0.00349965	0.0326755	1.22218	7	0.0617938	0.303413	1.69393	7	0.00129987	0.0146317	1.50958	7	0.00059994	0.010199	1.82985	7	0.00479952	0.0396731	1.98869	7	0.00249975	0.0197349	1.26247	6	0.00259974	0.0360364	1.53846	7	0.00459954	0.0327422	0.739349	6	0.00169983	0.0248617	1.00207	7	0.975802
260	EED92505.1	681	28309.1	LLADNFK;DGLPVMALVELVSSAPR	1;1	2	7	133647;288079;288081;290548;290557;290569;290575	XP_002290753.1	v-type h-atpase subunit, partial [Thalassiosira pseudonana CCMP1335]	0.48227	6	0.00069993	0.0095551	1.14639	7	0.355264	0.692843	0.464985	4	0.00109989	0.0129471	1.10448	7	0.652635	0.890271	0.901861	6	0.0661934	0.269865	0.802497	7	0.143286	0.379786	0.847508	7	0.0187981	0.14601	0.789625	7	0.00689931	0.0439069	1.17322	7	0.119788	0.425887	1.15543	6	0.0633937
261	EED92733.1	423	12000.2	GYLALPAEIVPATHK	1	1	7	307832;307833;307834;307835;307837;307838;338386	XP_002289196.1;EJK48869.1	RS10, ribosomal protein 10 40S small ribosomal subunit, partial [Thalassiosira pseudonana CCMP1335]	0.74711	5	0.00739926	0.0518812	1.00883	7	0.952005	0.981415	0.627032	7	0.00309969	0.0284824	0.877233	7	0.211479	0.56621	0.945542	5	0.370363	0.716088	0.983242	7	0.789521	0.921023	1.05861	6	0.29797	0.683133	1.04809	7	0.410359	0.707231	0.944391	6	0.655334	0.912626	0.88089	6	0.319068
262	EED93013.1	1142	94565.2	TQGIALSLGDR;MAEVTVSAQK;SMWAEFEWENK;SVFGEDALVNVSVEK;TPNTLANLTVELSTMGDMK	1;1;1;1;1	5	7	135466;135467;210196;288961;309348;309357;348149	XP_002289476.1	coatomer protein subunit beta 1 [Thalassiosira pseudonana CCMP1335]	0.807435	7	0.0256974	0.132684	0.937856	7	0.384062	0.707647	0.805385	6	0.0307969	0.1491	0.903908	6	0.117288	0.394988	0.861173	7	0.0218978	0.119939	0.743777	7	0.00149985	0.0138448	1.09805	7	0.155384	0.505286	0.967157	7	0.755724	0.90878	1.11446	7	0.233877	0.584367	0.87136	7	0.20258
263	EED93172.1	342	13743.4	LNVSGPVR;LIDLHAPSDVVK	1;1	2	7	55221;261862;261872;261876;261879;261880;261881	XP_002289635.1	RS20, ribosomal protein 20 40S small ribosomal subunit, partial [Thalassiosira pseudonana CCMP1335]	1.10818	6	0.123888	0.377076	0.848381	6	0.0257974	0.172814	1.05703	7	0.70173	0.895383	0.723569	6	0.00159984	0.0201602	0.928079	6	0.270373	0.619863	1.042	6	0.566343	0.78972	0.691366	7	0.0009999	0.0191683	0.77376	7	0.00449955	0.0324148	0.592067	6	0.0001	0.0035271	0.756645	6	0.00419958
264	EED93501.1	938	56536	SGEACSIVLR;IHPQTIAEGWR;SLHDALCILTATVK	1;1;1	3	7	123233;123238;190809;190813;190814;190815;302952	XP_002289964.1;EJK75596.1	the t-complex beta chaperonin-like protein, partial [Thalassiosira pseudonana CCMP1335]	0.618028	7	0.0715928	0.269333	0.991463	7	0.935506	0.976803	0.609102	7	0.10199	0.338276	0.985759	7	0.911709	0.97334	0.905181	7	0.130287	0.393206	0.893864	6	0.134487	0.362928	1.04661	7	0.441256	0.781555	1.02611	6	0.711629	0.89676	0.628988	6	0.00929907	0.078173	0.594164	7	0.0115988
265	EED95034.1	584	29677.8	VLISFAPK;FGELFPGPSK;TWYYDLLK;EEMTGTNFYFSR	1;1;1;1	4	7	150852;150853;209928;215587;233731;233733;233734	XP_002287591.1	predicted protein [Thalassiosira pseudonana CCMP1335]	0.59521	7	0.00269973	0.0267303	0.966556	5	0.550745	0.827035	0.569538	6	0.00309969	0.0284824	0.962769	6	0.551845	0.847039	0.949678	7	0.430257	0.76378	0.708538	7	0.00339966	0.0254975	0.958686	6	0.566343	0.850459	0.802867	7	0.163084	0.418396	0.735722	7	0.0237976	0.153448	0.599257	6	0.00049995
266	EED95145.1	1022	16918.8	SGVGISSMGVMNPGLVMR	1	1	7	299355;299364;301917;301918;301919;301922;301923	XP_002287702.1;EED94647.1;XP_002287204.1	vacuolar ATP synthase [Thalassiosira pseudonana CCMP1335]	0.637521	7	0.00589941	0.044667	0.960865	6	0.39996	0.718572	0.39748	7	0.00269973	0.0260011	0.643313	7	0.010299	0.0799946	0.657172	7	0.0188981	0.107656	0.588928	7	0.00169983	0.0152224	0.657796	6	0.00159984	0.0264487	0.646058	7	0.00589941	0.0386358	1.39328	5	0.00229977	0.0293425	1.28239	7	0.0130987
267	EED95871.1	1559	37624.1	YISDLTK;TGAAGAVAMK;GGYVSATPTFTVK;GVTIIASGSDQPTK	1;1;1;1	4	7	139857;139859;151378;156356;265851;274722;274739	XP_002286230.1	ornithine cyclodeaminase, partial [Thalassiosira pseudonana CCMP1335]	1.62642	6	0.00069993	0.0095551	0.865841	5	0.0356964	0.217065	1.57815	6	0.00269973	0.0260011	0.838632	7	0.0473953	0.230071	1.48574	7	0.00389961	0.0339473	1.51896	7	0.00039996	0.00486438	1.09586	5	0.0959904	0.395823	1.15224	7	0.0343966	0.148201	0.7767	7	0.0117988	0.0926431	1.00382	7	0.964504
268	EED96246.1	1275	102764	APEVTFTFER;MMSPGDVPPLR;SVLSGDTVVLLGR;KIDYGEAPK	1;1;1;0	3	7	156227;156231;157279;157283;162353;192853;192856;265318;265319	XP_002286605.1	predicted protein [Thalassiosira pseudonana CCMP1335]	1.03538	7	0.50065	0.791378	1.19298	6	0.00649935	0.0688931	0.852195	7	0.220878	0.526889	0.964417	7	0.739026	0.912248	1.00483	7	0.945205	0.984864	1.31033	7	0.0209979	0.10133	0.869388	7	0.030097	0.197937	1.12207	7	0.0687931	0.243891	0.849916	7	0.0450955	0.23447	0.979699	7	0.731827
269	EJK48668.1	1752	26231.3	GGVIGLTMSNAR;VCLVTGASR	1;1	2	7	26868;149713;149714;149736;154668;154677;85753	-	hypothetical protein THAOC_32518, partial [Thalassiosira oceanica]	1.91037	7	0.00309969	0.0295537	1.59709	7	0.00249975	0.0372277	1.52003	7	0.0155984	0.0945885	1.29989	7	0.030397	0.171173	1.10642	7	0.150085	0.434114	1.50348	7	0.00469953	0.0322868	0.95261	7	0.362664	0.739276	1.29215	7	0.0351965	0.14915	1.45208	7	0.0109989	0.0875532	1.54465	6	0.00049995
270	EJK50243.1	409	83102	TTLVDELLK	1	1	7	198091;198110;198111;198112;198120;198121;198122	-	hypothetical protein THAOC_30820 [Thalassiosira oceanica]	0.600474	5	0.00249975	0.0254494	0.796825	7	0.0738926	0.342299	0.665538	7	0.0367963	0.169489	0.863852	7	0.30407	0.667398	1.07332	7	0.455854	0.774732	0.623063	7	0.0039996	0.0286824	0.930843	7	0.132887	0.468614	0.536078	7	0.0001	0.00166743	0.70711	6	0.00139986	0.0215243	0.724466	7	0.00229977
271	EJK52057.1	198	35441	GLPQLTASLVK;GYDVVICDVK;GGGTPGYATYGATK	1;1;1	3	7	221768;221769;231452;260516;260517;260523;260524	EED90452.1;XP_002292477.1	hypothetical protein THAOC_28713 [Thalassiosira oceanica]	0.802682	7	0.152185	0.428002	1.06508	7	0.533147	0.812953	1.02325	6	0.782522	0.921018	1.28781	7	0.0412959	0.20962	1.20397	7	0.00239976	0.0232493	1.27527	7	0.00369963	0.0270705	1.1413	7	0.00379962	0.0465777	1.17284	6	0.0338966	0.147103	0.776571	7	0.0229977	0.150447	0.799677	7	0.060094
272	EJK52971.1	1489	86152.4	MSEALIR;EYIPGVVK;MDFPEPVIK;NIGIMAHIDAGK;GITITSAATTCEWR;HAVAGDIVALVGLK;EFNVEANVGAPQVSYR;INIIDTPGHVDFTLEVER;VLDGAVAVFDGVAGVEPQTETVWR	1;0;0;0;1;1;1;0;0	4	7	50212;160297;209185;248033;252827;252828;252829;272630;272631;292041;328453;328456;355988	-	hypothetical protein THAOC_27681 [Thalassiosira oceanica]	0.809641	7	0.0681932	0.260178	1.14832	6	0.0563944	0.290865	0.678664	7	0.0690931	0.255945	0.921117	7	0.662134	0.891087	1.0305	7	0.668333	0.897824	0.920992	7	0.289271	0.570896	0.894992	7	0.0512949	0.280101	0.797304	7	0.00239976	0.0206793	0.791813	6	0.0128987	0.0974991	0.915266	6	0.214879
273	EJK59967.1	685	37634.5	LEGLAALK;RMESLLMSNQIR;LDLSTNPYLEK	1;1;1	3	7	131936;240331;240336;258895;258899;258900;258902	EED91260.1;XP_002291153.1	hypothetical protein THAOC_19753 [Thalassiosira oceanica]	0.854565	6	0.0849915	0.297388	1.08159	7	0.30047	0.671869	0.961726	6	0.631537	0.862318	1.20476	7	0.0206979	0.130869	0.941123	7	0.368963	0.715502	1.00871	6	0.906109	0.969101	1.00686	7	0.920908	0.982686	1.07658	6	0.343566	0.652537	0.873848	7	0.325167	0.700638	0.815849	7	0.193281
274	EJK60504.1	88	21289.5	LDMMETMMK;GKLDMMETMMK	1;1	2	7	222279;222283;222284;222285;222286;312525;314540	EED94655.1;XP_002287212.1;EJK76212.1	hypothetical protein THAOC_19126, partial [Thalassiosira oceanica]	1.57235	7	0.00989901	0.0655809	1.35821	7	0.00259974	0.0374779	2.22346	7	0.00019998	0.00360164	2.13189	6	0.0001	0.00261133	1.63669	7	0.00019998	0.00371509	2.91573	6	0.0001	0.0016362	1.29605	6	0.00039996	0.0093601	2.36961	6	0.0001	0.00166743	0.422193	7	0.00039996	0.00827044	0.484503	7	0.00019998
275	EJK60932.1	527	70640.6	GPFTYDAR;TTLLPGLLK;FVPLTHTDEGR;YDLLCIEGISR;YQSFIELQDQLHR;NVFIECTATDLTK	1;0;1;1;0;0	3	7	75716;75720;176507;176508;176509;180247;180249;180269;198768;198769;274386;274391;274392;274393;298090;298093;298096;298097;298100	-	hypothetical protein THAOC_18650 [Thalassiosira oceanica]	1.20874	19	0.00859914	0.0580361	1.07791	18	0.138186	0.482693	1.13023	19	0.113389	0.361439	0.990856	19	0.845215	0.950588	0.845042	19	0.00049995	0.00763483	1.22512	19	0.0009999	0.0100549	0.938414	19	0.175782	0.53237	1.35842	19	0.0001	0.00166743	0.879045	16	0.00069993	0.012225	0.811979	19	0.00159984
276	EJK62480.1	1106	30275.3	YTLLTGAGFEVER	1	1	7	61586;227715;227716;227719;227737;288922;288923	EED94901.1;XP_002287458.1	hypothetical protein THAOC_16908 [Thalassiosira oceanica]	1.45242	7	0.0248975	0.129669	1.22512	6	0.00549945	0.0615256	1.28064	7	0.117788	0.371518	1.12555	6	0.0730927	0.300576	1.22244	6	0.00509949	0.0417695	1.29344	7	0.0853915	0.26856	1.26972	7	0.0113989	0.103605	1.45678	7	0.039996	0.165213	1.35278	7	0.00259974	0.0313888	1.21333	7	0.0944906
277	EJK65694.1	1385	44619.9	MLGGTLVTK;EFYFAIFMDR;ALYNLFVDK;AILVNIFGGIMK	1;1;1;1	4	7	165050;202888;202891;211097;211101;211102;255525	-	hypothetical protein THAOC_13425 [Thalassiosira oceanica]	1.25559	7	0.10439	0.337115	1.10569	6	0.0554945	0.289745	1.22502	7	0.147585	0.427191	1.03143	7	0.856914	0.953774	1.01895	5	0.759224	0.921723	1.39832	6	0.00189981	0.0162069	1.0608	7	0.310569	0.696943	1.39456	7	0.00059994	0.00647001	0.872554	7	0.124588	0.430752	0.825119	7	0.159184
278	EJK66240.1	954	15096	MSVLADCLK	1	1	7	199348;199349;203490;203491;203492;203493;203498	EED90124.1;XP_002292928.1	hypothetical protein THAOC_12849 [Thalassiosira oceanica]	0.746698	7	0.118288	0.366226	1.00399	7	0.977502	0.993845	0.636545	7	0.039496	0.176946	0.870289	7	0.337966	0.695223	0.851129	7	0.114389	0.372073	0.706085	5	0.020398	0.0992333	0.915867	7	0.156184	0.505286	0.751232	7	0.107289	0.32781	0.936838	6	0.381862	0.747848	0.770537	7	0.120488
279	EJK66715.1	795	50027.2	TISPSMDICVSSNFER;LAVLGATSGDTGSAAIYGLR;MGLPVGDLIVATNENDILHR	1;1;1	3	7	304654;308839;308840;308841;308842;308852;337610	EED89364.1;XP_002293628.1	hypothetical protein THAOC_12335 [Thalassiosira oceanica]	0.84092	7	0.132187	0.390493	0.969711	7	0.559244	0.829191	0.728574	6	0.0158984	0.0954435	0.765487	7	0.059694	0.269596	0.985225	7	0.911309	0.973431	0.769455	6	0.0129987	0.0678193	0.85753	7	0.0612939	0.307664	0.745373	7	0.142086	0.392105	1.22718	7	0.210279	0.557953	1.45769	7	0.0079992
280	EJK71445.1	1420	67918.7	VVDALNATR;AVAAGMNPLDVR;TQVCELENPVILLVEK	0;0;1	1	7	84728;84730;84732;84733;161823;161827;161838;166667;166668;166686;338369;338370;338373;338375;338376;338377;338380	-	hypothetical protein THAOC_07117 [Thalassiosira oceanica]	1.00054	7	0.9963	0.999555	0.623182	6	0.0001	0.00353298	1.28723	7	0.0725927	0.26412	0.816772	7	0.0408959	0.209194	0.799694	7	0.0143986	0.0894697	1.43009	5	0.00549945	0.0353536	0.842569	7	0.0139986	0.118429	1.48463	6	0.00039996	0.00461749	0.683413	6	0.00029997	0.00719528	0.64297	6	0.0001
281	EJK72630.1	1680	67119.1	GNLPLHSAASFR;MELPDPTPFEIAR	1;1	2	7	179764;179765;179783;241683;241686;241689;241692	-	hypothetical protein THAOC_05822, partial [Thalassiosira oceanica]	1.1578	7	0.019798	0.111837	1.29481	7	0.0405959	0.237513	0.847061	6	0.0589941	0.235217	1.08528	7	0.245975	0.604111	0.983075	7	0.828117	0.934947	0.8375	7	0.0407959	0.162462	1.11591	7	0.049995	0.274668	0.973988	7	0.715428	0.898153	1.30182	7	0.0460954	0.235584	1.14496	7	0.19818
282	EJK73267.1	1766	28282.2	EVAEAGVNMMVAGSAILK;AGLVFNPATSIDYCEFVK;EVAEAGVNMMVAGSAILKEPR	1;1;1	3	7	330886;330887;347844;347845;347847;347848;354455	-	hypothetical protein THAOC_05120 [Thalassiosira oceanica]	1.8887	6	0.00419958	0.0358656	0.958628	7	0.286871	0.661204	2.06277	6	0.00379962	0.0330585	1.05383	7	0.314169	0.677191	2.39326	7	0.00069993	0.00941249	1.57962	7	0.0184982	0.0922345	1.11013	6	0.147785	0.487512	0.787786	7	0.0116988	0.0660489	0.922363	7	0.163384	0.4946	1.77113	7	0.00039996
283	EJK74801.1	420	58782.4	EVGVIGWGSQAPAQAQNLR;DLFPLLPK;GILLGAVHGIVESLYR;GVAFMVDNCSFTAK;SDLVMLLISDAAQAALYK;EILQEIYDEVSSGNEIR	1;0;0;0;0;0	1	7	163630;319371;319372;319376;319378;319379;319380;172171;172173;172174;278304;303571;303574;303575;305724;305727;305729;342274;345750;345754;345757;345758	-	hypothetical protein THAOC_03504 [Thalassiosira oceanica]	1.09034	22	0.0956904	0.318144	1.09277	22	0.0605939	0.3008	1.12753	22	0.106389	0.347115	1.15454	22	0.00809919	0.0666427	0.88302	22	0.00759924	0.0563532	0.914801	22	0.0551945	0.201521	0.996337	22	0.930607	0.982782	1.03181	22	0.637736	0.857137	1.0882	19	0.110089	0.404184	1.01417	19	0.80042
284	XP_002286571.1	344	22439.4	KQWFNVK;QWFNVKDELTR;KQWFNVKDELTR	1;1;1	3	7	251165;251169;285744;285751;337293;337294;337295	EED96212.1	predicted protein [Thalassiosira pseudonana CCMP1335]	1.1019	7	0.552545	0.822881	1.18638	7	0.0731927	0.340809	1.19191	7	0.288171	0.608436	1.29516	7	0.0161984	0.113138	3.1055	7	0.0001	0.00219734	3.71062	7	0.0001	0.0016362	1.15573	7	0.0029997	0.0400404	1.38393	7	0.00029997	0.00377794	0.42335	5	0.0001	0.0035271	1.00943	6	0.89731
285	XP_002286873.1	448	54002.1	TPANQSIFR;GQEILSGAQR;VFEIGPVFR	1;1;1	3	7	106267;106268;106271;113455;113456;115029;115030	EED96514.1;EJK74501.1	aspartate-trna ligase [Thalassiosira pseudonana CCMP1335]	0.667775	7	0.00019998	0.00367718	0.853965	7	0.00859914	0.0851409	0.537608	7	0.0001	0.00211861	0.69388	7	0.00439956	0.0440445	0.799061	6	0.0149985	0.0925592	0.787104	7	0.00729927	0.0440896	0.876419	7	0.135586	0.471378	0.963041	6	0.584942	0.826184	1.0043	7	0.954305	0.990535	0.86306	7	0.10149
286	XP_002287000.1	931	76660.5	TQLFMER;LLDANSQK;MPFAAAQIGLGFR;ACYDLDVHGK;GLFDLGPPACALK	1;1;1;0;1	4	7	75309;75310;155060;208926;208998;233794;271769;271775	EED96641.1	glycyl tRNA synthetase [Thalassiosira pseudonana CCMP1335]	1.35774	6	0.00239976	0.0248527	1.20349	7	0.0320968	0.203656	1.16242	6	0.0817918	0.287148	1.05693	7	0.549245	0.847039	0.885275	7	0.0674933	0.27331	1.24666	7	0.110489	0.317193	0.972616	6	0.552845	0.844412	1.45651	7	0.0009999	0.00978706	1.16874	5	0.0687931	0.307611	0.908005	6	0.180582
287	XP_002287502.1	230	38981.7	SLMECLYK;TTLVNYILK;IDSIVCLADCK;IHNLELVQSVGIK	1;1;1;1	4	7	201073;201098;206514;206515;206516;259047;288124	EED94945.1	hypothetical protein THAPSDRAFT_39666 [Thalassiosira pseudonana CCMP1335]	1.19506	7	0.0208979	0.116588	1.08516	7	0.288871	0.662272	1.27074	7	0.0822918	0.288131	1.1075	6	0.113289	0.388111	1.00386	7	0.971703	0.989732	1.20058	7	0.132087	0.359422	1.15609	7	0.0919908	0.386404	1.31885	6	0.00369963	0.0283533	0.97171	7	0.79762	0.95303	0.841076	7	0.174183
288	XP_002287516.1	1083	62125.8	IMVGLEK;DVFSQAK;QPEVYSK;GVILDGPPGTGK;LVNNSYITAK;VDILDQALLRPGR;QYLESQLAVALGGR;LELAEVVDFLK;NAPCIIFIDEIDAVGR;VTFSADGTQLLGVDTDGTR;KNAPCIIFIDEIDAVGR;TPGFSGAQLENLMNEAAISAAR;RTPGFSGAQLENLMNEAAISAAR;AVAGEAGVPFISISGSEFVEMFVGVGASR;EQTINQILVEMDGFDGNPGIITIAATNR;QNELVAYHEAGHAICGALIPDYDQVQK	0;1;0;0;1;0;0;1;0;0;0;0;0;0;0;1	4	7	124011;125359;125363;125368;143058;143059;228423;217996;220848;220853;230123;230124;230125;230126;230127;230128;230130;239234;239242;239243;239246;239250;239252;255518;295900;295905;295908;315984;315999;316002;316003;316004;316005;316006;316007;316009;316011;316013;316014;316015;341710;341711;341712;342549;342554;342555;343540;343541;351191;351193;351194;351195;351962;351965;351966;351967;365043;…	EED94959.1	metalloprotease, partial [Thalassiosira pseudonana CCMP1335]	0.746929	7	0.00379962	0.0337286	0.736995	7	0.00059994	0.0138602	0.582306	7	0.00229977	0.023269	0.575318	7	0.0001	0.00261133	0.811342	7	0.0935906	0.331989	0.633557	7	0.00859914	0.0491379	0.924484	5	0.141886	0.480035	0.808238	6	0.0089991	0.0542053	0.897526	7	0.167083	0.501271	0.720633	6	0.00189981
289	XP_002287523.1	1173	42198.1	STRDPLEFVK;DPLEFVK	1;1	2	7	14216;237182;142157;142168;142175;142176;142177	EED94966.1;EJK55386.1	pyruvate dehydrogenase [Thalassiosira pseudonana CCMP1335]	1.3692	7	0.00379962	0.0337286	1.11129	7	0.185281	0.556462	1.52976	7	0.00019998	0.00360164	1.18534	6	0.019598	0.127493	1.0847	7	0.29977	0.650826	1.31312	7	0.0322968	0.136146	1.00024	7	0.9967	0.9993	1.21596	7	0.00619938	0.0401622	1.04348	7	0.544846	0.847171	1.09075	6	0.222078
290	XP_002287665.1	288	110824	QFGLADGK;NGGGPIEHLK;GGILVGDASDYSK;SAAVIGGGLLGLEAAK	1;0;1;1	3	7	138418;195450;256598;256606;284379;284381;284383;284384	EED95108.1	NADPH nitrite reductase [Thalassiosira pseudonana CCMP1335]	0.929525	7	0.471153	0.768342	1.08359	7	0.273773	0.648276	0.847777	7	0.222778	0.52862	1.03495	5	0.644936	0.889537	0.934513	7	0.324468	0.678295	1.08428	7	0.251575	0.521699	1.16467	6	0.0114988	0.103605	1.29493	7	0.00869913	0.0527513	0.817556	6	0.0720928	0.314794	0.597959	5	0.00449955
291	XP_002287939.1	1153	65803.3	ILPQHVFNQK;GLLTPPPSR;GTPFVVALNK;DPIIVGVEVVEGILK;GCPEYATILAFDVPVER	1;1;1;1;1	5	7	16357;78994;78996;201786;201789;307848;314223	EED95382.1	predicted protein [Thalassiosira pseudonana CCMP1335]	0.65869	7	0.00039996	0.00655207	0.891528	7	0.279372	0.653803	0.719654	7	0.00379962	0.0330585	1.08153	6	0.336166	0.694899	0.950339	7	0.434557	0.764281	1.02069	6	0.780122	0.921023	1.01445	7	0.872513	0.971135	1.02973	5	0.725727	0.901278	0.698377	7	0.00949905	0.0791148	0.65518	5	0.00129987
292	XP_002288025.1	875	15444	IVTHGPYK	1	1	7	163443;163445;163447;163450;163451;243320;243328	EED95468.1;EJK69097.1	predicted protein [Thalassiosira pseudonana CCMP1335]	1.57665	7	0.0191981	0.109478	1.17547	7	0.234077	0.60779	2.18717	7	0.00079992	0.0100046	1.59307	7	0.00829917	0.0679777	3.26369	7	0.0001	0.00219734	3.44026	7	0.00019998	0.00281222	1.7512	7	0.00269973	0.0368554	1.92504	7	0.00159984	0.0150854	0.337423	7	0.0001	0.0035271	0.585751	7	0.00479952
293	XP_002289031.1	537	66824.7	EIGSVNTVIVK;VLIGDNTDWK;QNIIPHVDVLTDAAK	1;1;1	3	7	229316;229318;229322;229790;229826;314469;314470	EED94467.1	predicted protein [Thalassiosira pseudonana CCMP1335]	1.11034	7	0.390861	0.70716	1.00316	7	0.963704	0.986701	1.26746	7	0.0826917	0.28862	1.13509	5	0.105689	0.37016	1.09548	7	0.249075	0.587478	1.31713	6	0.00559944	0.0357411	1.04965	7	0.505449	0.82179	1.19664	7	0.0351965	0.14915	0.796558	7	0.0214978	0.144849	0.821935	7	0.10449
294	XP_002289659.1	1245	20343.3	IVMLGDSGVGK;GVILVYDVTNAK;AEMFCAEFGMEHLETSAK	1;1;1	3	7	9226;209231;258718;258719;258724;350617;350618	EED93196.1	predicted protein, partial [Thalassiosira pseudonana CCMP1335]	1.12794	7	0.493051	0.782799	1.33475	7	0.0175982	0.135521	1.07258	7	0.740526	0.908874	1.30908	7	0.0381962	0.200492	1.05096	7	0.458154	0.776664	1.29563	5	0.020498	0.099451	1.15112	7	0.00349965	0.044726	1.23497	6	0.0767923	0.264948	0.860033	7	0.336066	0.706289	0.775587	7	0.0685931
295	XP_002290907.1	405	100263	AANMGVAMGK;VAMITGDHK;DTATAIGHMLGIVDEK;ALPAVETLGSVTVICSDK;EASEMILADDNFATIVYAVK	0;0;1;0;1	2	7	174419;179717;179731;179739;179746;179751;181605;181606;318656;318658;318659;318660;320469;336687;336690;336691;336692;336693;355593;356169	EED91014.1	cation transporting ATPase, partial [Thalassiosira pseudonana CCMP1335]	0.679584	7	0.0288971	0.143451	0.927707	6	0.336966	0.685342	0.823338	7	0.334567	0.664399	1.14604	6	0.336266	0.694899	0.808695	6	0.0330967	0.166129	0.606894	6	0.00059994	0.00638989	0.864876	7	0.128387	0.462707	0.867546	6	0.050395	0.196029	0.771757	7	0.263674	0.623323	0.647938	7	0.115088
296	XP_002291980.1	74	57929.9	RSDVLSAWR;VADIMAEELGWSK	1;1	2	7	122787;122792;287909;287913;287914;287934;287935	EED90831.1	predicted protein [Thalassiosira pseudonana CCMP1335]	0.887617	7	0.425257	0.731216	0.922465	7	0.39886	0.718572	0.845306	7	0.186081	0.482205	0.892488	7	0.266673	0.62981	0.854706	7	0.0744926	0.291183	0.703004	7	0.00879912	0.0498063	0.95729	7	0.662034	0.887638	0.782197	7	0.00949905	0.0568365	0.975866	7	0.863214	0.96997	0.890362	7	0.388761
297	XP_002292230.1	712	38236.9	NEVAMVLR;LIAPPIYVLSTMTLEK;YPEIESLVMVNVR;AVSLKEETELQAMMER	1;1;1;1	4	7	77134;190127;332207;332209;249073;252435;337044	EED90205.1	eukaryotic translation initiation factor 2 alpha subunit [Thalassiosira pseudonana CCMP1335]	0.969722	6	0.687831	0.884845	0.881374	6	0.0911909	0.386649	0.802653	7	0.0235976	0.124998	0.930452	7	0.347465	0.699589	0.65984	7	0.00159984	0.0167611	0.729299	7	0.00339966	0.0254975	0.825794	7	0.00919908	0.0915842	0.899652	5	0.214279	0.495399	1.11887	7	0.333167	0.704801	0.936024	7	0.633137
298	XP_002294103.1	1081	73290.7	YIVILPVSR;SAGVELGHVLLK;ELVDSLFLQTDK;IQNDWQGPQMVK	1;1;1;1	4	7	113898;113899;244338;244339;281051;281053;287074	EED88458.1	predicted protein [Thalassiosira pseudonana CCMP1335]	0.546409	7	0.00679932	0.0496048	0.479859	7	0.00479952	0.0576582	0.457309	7	0.00249975	0.0247365	0.388966	7	0.00139986	0.0186855	0.824774	7	0.00309969	0.0284982	0.631374	7	0.00639936	0.0397202	0.975947	6	0.552945	0.844412	0.712975	7	0.0222978	0.110325	0.96271	7	0.684732	0.915848	0.793656	6	0.010199
299	XP_002294462.1	445	179710	GMVQGCVLPQFYK;GACGGDGISGDGAGIMTQIPWK;LVSSIGIGTVACGVAK;SDSANLDAVFELMTK;VCHLNTCPVGVTSQK;AQADVIQISGGDGGTGASPLSSIK	1;1;0;0;1;1	4	7	132035;245786;354074;301397;315176;315180;321939;321940;356711;356712	EED88296.1	glutamate synthase [Thalassiosira pseudonana CCMP1335]	0.861864	7	0.0669933	0.257953	1.01574	7	0.89781	0.961863	0.94134	7	0.436256	0.738438	1.01627	6	0.810719	0.936624	1.1318	6	0.215278	0.529961	1.0931	7	0.286171	0.567926	1.34578	7	0.0732927	0.345742	1.25684	7	0.193581	0.466489	0.686785	7	0.0469953	0.238154	0.593687	7	0.0438956
300	XP_002296689.1	457	47183.7	TPLTSIVGGAK;KTPLTSIVGGAK;ALLEAVAETTAAGNVGIIGGGDSATAAAK	1;1;1	3	7	201221;201222;201224;201225;292187;292188;365324	EED86890.1	phosphoglycerate kinase [Thalassiosira pseudonana CCMP1335]	1.05498	6	0.605039	0.84979	1.04147	7	0.30497	0.67265	0.929118	6	0.356564	0.680458	1.06477	6	0.561844	0.852224	0.789863	7	0.0121988	0.0782285	1.06508	7	0.487151	0.744291	0.881802	7	0.020298	0.153685	1.26175	6	0.0069993	0.0442307	0.878542	7	0.163084	0.4946	0.78517	7	0.0108989
301	XP_002297537.1	320	21310.6	LAPDNYPR;AAEYWYQALK	1;1	2	7	80902;80917;248685;248686;248687;248697;248698	YP_009093444.1;YP_874527.1;ABK20750.1;YP_004072541.1;EED86177.1;AIR76117.1;YP_009093171.1;AIR75844.1;ADB27495.1;AIR75569.1;AIR75428.1;sp|A0T0R5.1|YCF3_THAPS	photosystem I assembly protein ycf3, hypothetical, plastid-encoded [Thalassiosira pseudonana CCMP1335]	0.731697	7	0.00679932	0.0496048	0.88597	7	0.060294	0.3008	0.631097	6	0.00219978	0.0225102	0.870095	7	0.244776	0.604111	1.02302	6	0.685831	0.90169	0.625854	7	0.00039996	0.00486438	1.11347	7	0.246875	0.622195	0.652988	7	0.00589941	0.0386358	0.874967	7	0.241276	0.597545	0.767309	6	0.00559944
302	YP_009093249.1	738	13802.4	AALEALSTGIK;KGTPFAAQTAAEK	1;1	2	7	208823;208830;208832;208834;313155;313159;313162	AIR75506.1;AIR75647.1;AIR75922.1	ribosomal protein S11 (chloroplast) [Roundia cardiophora]	0.532123	7	0.00049995	0.00763483	0.719002	7	0.0169983	0.133178	0.423816	7	0.00379962	0.0330585	0.572219	7	0.0182982	0.121225	0.954623	5	0.452455	0.772818	0.48395	7	0.00059994	0.00638989	0.908455	7	0.112889	0.43467	0.424359	6	0.0001	0.00166743	0.664953	6	0.00029997	0.00719528	0.736783	7	0.00229977
303	ABK20806.1	775	65622	IAGIEVLR;AVITVPAYFNDSQR;TTPSIVAYTK;TTINLPFITADK;QSVVNAENTFFSVK;IINEPTAASLAYGLDK;SELFSTAADNQTNVEIHVLQGER;VVGIDLGTTNSVVAAIEGGQPTVITNAEGFR	0;0;0;0;1;0;1;1	3	6	61960;61966;83235;255588;255590;255594;255595;255596;255597;255598;255599;307912;210512;267128;267135;267136;267137;306635;306638;319294;319295;319297;357490;357491;357492;367024	sp|A0T0X1.1|DNAK_THAPS;YP_874583.1	Hsp70-type chaperone (chloroplast) [Thalassiosira pseudonana]	1.03324	6	0.854515	0.959997	1.12471	6	0.0942906	0.393314	0.97183	6	0.893711	0.953538	1.07143	6	0.587041	0.864462	0.882943	4	0.143086	0.420621	1.07474	6	0.564544	0.788958	0.940263	6	0.219178	0.591256	1.11124	6	0.385961	0.687634	1.19964	6	0.0321968	0.188671	1.16485	6	0.0684932
304	ABK20835.1	476	44525.5	GTVATGR;EHILLAK;TIGAGVVSK;RGDNPWVDK;TFLMAIEDVFSITGR;NMITGAAQMDGAILVVSAADGPMPQTR;QVGVPHIVVFLNK;GITINTAHVEYETADR;MTAELIYPVAIEEGMR;HYAHVDCPGHADYVK;TKPHVNIGTIGHVDHGK	0;0;0;1;0;0;0;1;0;0;0	2	6	22445;134745;134746;137198;137199;137200;211922;211934;211938;211941;211942;278929;278937;281723;281737;280581;282371;361883;361884;361886;362198;362199;362200;362201;362203;362514;288128;288129;293697;299201;299204;299205;299208;299212;299213;299217;299218;299219;299220;299221;299224;301758;301759;301760;301767;301769;301770;301774;301775;301777;301778;301781;301782;301784;301788;301813;333732;3…	sp|A0T100.1|EFTU_THAPS;YP_874612.1	translation elongation factor Tu (chloroplast) [Thalassiosira pseudonana]	1.29354	6	0.0441956	0.198111	1.01673	6	0.719528	0.902269	1.50228	6	0.0632937	0.243053	1.34649	5	0.0214978	0.134045	1.41903	5	0.00039996	0.00643507	1.54605	5	0.0059994	0.0377585	1.37184	4	0.00139986	0.0244908	1.54008	4	0.00419958	0.0306212	0.717532	5	0.00459954	0.0470146	0.687519	6	0.00359964
305	AIR75492.1	455	24161	LASISNIHINR;EANTIYGVLGVK	1;0	1	6	169326;169331;169335;169339;169341;169357;253148;253149	-	ribosomal protein S3 (chloroplast) [Cyclotella sp. L04_2]	0.935599	6	0.410859	0.720903	0.998475	6	0.987001	0.996401	1.07272	6	0.678132	0.888771	1.14423	6	0.370963	0.717059	1.50454	5	0.00149985	0.0159925	0.919036	6	0.246275	0.519503	1.88485	5	0.0001	0.00367718	1.27238	6	0.0059994	0.0390069	0.825606	4	0.0832917	0.342515	0.57162	6	0.0001
306	AIR75931.1	690	103569	FFRPEFLNR;LIGSPPGYVGFQDGGQLTEAVR;GTGFVASEIPFTPR;MGHNFVGTEQLLLGVIGQR;QKPYSIVLFDEVEK	0;0;0;1;1	2	6	165577;215699;215700;343395;343396;233119;233123;233124;330069;330070;330071;330077;346060;346063	YP_009093258.1	Clp protease ATP binding subunit (chloroplast) [Roundia cardiophora]	0.77472	6	0.0029997	0.0289062	0.926995	6	0.361864	0.694276	0.884453	6	0.271773	0.589714	1.04177	6	0.551545	0.847039	0.793878	5	0.0337966	0.167807	0.710757	5	0.00709929	0.043026	0.986579	6	0.809619	0.958842	0.790833	6	0.0211979	0.106939	0.954727	6	0.546245	0.847196	0.837531	6	0.0935906
307	AIR76108.1	500	25287.2	TTVTLPHGVGK;SGTVSTTLTETLSDFK	1;1	2	6	217786;320470;320473;320475;320476;320477	YP_009093435.1	ribosomal protein L1 (chloroplast) [Thalassiosira weissflogii]	0.777953	6	0.131487	0.389063	0.613814	6	0.115588	0.44223	0.881938	5	0.213879	0.522433	0.614199	6	0.122588	0.406072	1.02571	6	0.670933	0.8989	1.17713	6	0.0645935	0.22231	0.737603	5	0.00059994	0.0124263	0.851135	6	0.0485951	0.191485	0.461395	6	0.00109989	0.0178261	0.615073	6	0.0145985
308	EED87136.1	1534	36744.3	QYYMSAGDIACPIVFR;VFILGEEVAQYQGAYK;VIDTPITEMGFTGMAIGAAYK	1;1;1	3	6	308531;310525;333080;333083;355037;355704	XP_002296440.1	pyruvate dehydrogenase [Thalassiosira pseudonana CCMP1335]	1.13616	5	0.124088	0.377076	1.11315	5	0.0907909	0.386649	1.1143	5	0.278372	0.598268	1.04131	6	0.628737	0.885578	0.992693	6	0.920908	0.975015	1.0342	6	0.70313	0.874074	1.00355	6	0.961104	0.98946	1.05087	6	0.580042	0.823861	1.04463	5	0.564744	0.855197	1.10461	6	0.333767
309	EED87185.1	756	50036.3	EACMDAYDKPIHF;MAVIGGGVIGLEMGSVWSR;TAVPSIYAIGDCIDGPMLAHK;NIIIATGSEVTPLPPVPVDNAGGK	1;1;0;1	3	6	309722;309723;313994;313996;315825;356705;356707;357190;360747	XP_002296489.1	precursor of hydrogenase lipoamide dehydrogenase, partial [Thalassiosira pseudonana CCMP1335]	1.46446	6	0.00279972	0.027419	1.27451	5	0.0039996	0.0518509	1.12296	6	0.40136	0.713224	0.962819	6	0.736926	0.912048	1.10962	6	0.110189	0.364317	1.33319	6	0.0590941	0.213593	1.08852	5	0.176282	0.532988	1.49356	6	0.0135986	0.0748965	1.22168	6	0.186681	0.527541	1.11899	6	0.547245
310	EED87388.1	609	67323.7	FPHAVLEVK;TAFQIPFDATVR;EMLQVVQVK;SVPYWVDDASIR;ISLDTNLCMISER	1;1;1;1;1	5	6	200177;205617;208802;208810;216015;249637	XP_002295322.1	predicted protein [Thalassiosira pseudonana CCMP1335]	0.928256	5	0.337666	0.655684	0.959541	6	0.561244	0.829191	0.899554	5	0.285071	0.604016	0.898891	5	0.162384	0.480485	0.847117	5	0.0414959	0.194728	0.807785	4	0.0940906	0.285854	0.920181	5	0.134787	0.470146	0.999354	6	0.9958	0.997462	1.20034	6	0.070493	0.310826	0.979719	6	0.859614
311	EED88836.1	1342	26552.6	SLTLLPR;LLLSPTGIMVK;VQWWFGDGAK;VVFVGGGDSMLLHEVLK	1;1;1;1	4	6	46302;46303;232532;237557;237560;331773	XP_002293827.1	hypothetical protein THAPSDRAFT_264237, partial [Thalassiosira pseudonana CCMP1335]	1.10005	6	0.354565	0.67379	1.23668	6	0.0109989	0.100609	1.06135	6	0.752825	0.913264	1.23515	4	0.0539946	0.252068	0.992184	5	0.894211	0.962727	1.08734	6	0.250475	0.521678	1.38604	4	0.00109989	0.0206459	1.5416	5	0.00019998	0.00262893	0.979912	6	0.89991	0.979117	0.739418	6	0.0485951
312	EED89002.1	1300	53288.9	VCDAVSITLNK;SPFEYCDVVTTTTHK	1;1	2	6	243545;243546;330356;330357;330359;330360	XP_002293993.1	serine hydroxymethyltransferase [Thalassiosira pseudonana CCMP1335]	0.946181	6	0.624438	0.860808	1.08502	6	0.10209	0.410638	1.48161	6	0.0810919	0.285805	1.70322	6	0.00149985	0.019728	1.49782	6	0.00029997	0.00514806	1.96832	6	0.0001	0.0016362	1.73059	6	0.00029997	0.00772209	2.33001	6	0.0001	0.00166743	0.38238	6	0.00029997	0.00719528	0.318917	6	0.0001
313	EED89203.1	1528	115709	LNVLANVMR;STPYASDLGK;LEQIAPFAFDK;FGLDGGEAIVPALK	1;1;1;1	4	6	105309;199838;199845;199846;256038;277179	XP_002293467.1	2-oxoglutarate dehydrogenase E1 component [Thalassiosira pseudonana CCMP1335]	1.07152	6	0.348065	0.665832	1.24818	4	0.0191981	0.142675	0.89632	6	0.252475	0.565077	0.995123	6	0.966603	0.989517	0.70609	6	0.00039996	0.00643507	0.835822	6	0.132487	0.359422	0.766146	5	0.00139986	0.0244908	0.956397	6	0.59994	0.83184	1.18568	6	0.020498	0.139681	1.06275	6	0.638036
314	EED89316.1	912	55250.1	GGAGFPSGLK;LFAISGHVK;EGTSWLEDILIR;IFTNLYGEQDWR;NACGSGYDFDVYLHR	1;1;1;1;1	5	6	155786;155787;181657;221895;247512;291064	XP_002293580.1	hypothetical protein THAPSDRAFT_29850 [Thalassiosira pseudonana CCMP1335]	1.56607	6	0.00069993	0.0095551	1.48032	4	0.00089991	0.0178202	1.54636	5	0.00309969	0.0284824	1.52992	4	0.00229977	0.0272644	1.06823	5	0.29727	0.646612	1.34028	5	0.0353965	0.145798	1.11186	6	0.214179	0.583006	1.50725	5	0.0069993	0.0442307	0.981378	4	0.845515	0.962403	0.817072	5	0.049595
315	EED89475.1	1329	17723.8	LVLEFTEDYPNK;LVLEFTEDYPNKAPSVR	1;1	2	6	290811;344755;344756;344757;344759;344760	XP_002293014.1	ubiquitin-conjugating enzyme 1 [Thalassiosira pseudonana CCMP1335]	1.06313	4	0.533047	0.811428	0.959802	6	0.692631	0.891515	1.12137	4	0.361164	0.684837	0.974349	6	0.79872	0.936548	0.817405	4	0.0373963	0.18213	1.17436	6	0.121288	0.339531	0.974041	6	0.522648	0.826782	1.41849	6	0.00369963	0.0283533	0.843177	6	0.261174	0.618226	0.699196	6	0.00759924
316	EED89518.1	1067	49598.1	EACGLIVDLIR;ALLLAGAPGTGK;SLESTLSPIVVFATNR	1;1;1	3	6	176084;176090;207549;284893;284901;284902	XP_002293057.1	RuvB dna-helicase [Thalassiosira pseudonana CCMP1335]	1.29425	6	0.250175	0.557431	0.832523	6	0.0636936	0.309369	0.789182	5	0.238976	0.548974	0.637768	6	0.0009999	0.0146489	0.826316	5	0.0167983	0.0999029	0.878983	5	0.492551	0.748178	0.903789	5	0.0745925	0.346151	1.01673	5	0.932807	0.980633	1.34302	6	0.0689931	0.307611	1.19209	6	0.258574
317	EED89696.1	1256	40461.4	LVFDI;DYCDISVAVASPNGLVVPVLR	1;1	2	6	15702;15703;15706;15707;15708;357161	XP_002293235.1	predicted protein, partial [Thalassiosira pseudonana CCMP1335]	1.14405	6	0.327167	0.645028	1.13753	6	0.0274973	0.182169	0.599882	5	0.00179982	0.018956	0.696596	6	0.0454954	0.222779	0.894057	6	0.333967	0.690147	0.98033	6	0.785921	0.921023	0.812007	6	0.0492951	0.273322	0.867954	6	0.0608939	0.224919	1.17156	6	0.155584	0.48258	1.31376	6	0.0186981
318	EED89850.1	1498	31772.5	TTVNYQYR;TLYADGGIPR;GVLPALIQGPLSR;IFLMPVDTVK	1;1;1;1	4	6	109457;114632;194238;194239;194240;230405	XP_002292654.1	predicted protein [Thalassiosira pseudonana CCMP1335]	0.606231	4	0.00149985	0.0169983	0.781728	4	0.0133987	0.113354	0.345631	6	0.00029997	0.00478094	0.488371	6	0.0009999	0.0146489	0.714053	6	0.00149985	0.0159925	0.530882	5	0.00019998	0.00281222	0.903333	6	0.258074	0.638805	0.717792	6	0.0459954	0.183269	1.43907	6	0.0257974	0.160587	1.17229	6	0.225777
319	EED89932.1	652	21722.1	GAAGALLVYDITR;SCLLLQFTDK;HGLIFMETSAK;LQIWDTAGQESFR	1;1;1;1	4	6	193865;193866;244693;246718;249398;249399	XP_002292736.1	predicted protein, partial [Thalassiosira pseudonana CCMP1335]	1.12889	6	0.30257	0.617475	1.03093	6	0.556244	0.828124	0.970304	5	0.774623	0.921018	0.930155	5	0.332667	0.692497	1.13486	6	0.155884	0.447299	1.29743	5	0.0971903	0.28964	1.10421	5	0.0780922	0.352706	1.33932	5	0.0207979	0.105811	1.05197	5	0.686331	0.915957	1.02105	5	0.809919
320	EED89940.1	1619	28822.3	NTYGYLEPDLWK;EAEIIDYFLK;LLSMAGIEDCYTSTR;EGGRDENVWVPVTK;IGSIEEIFLFSIPVK	0;0;1;1;0	2	6	126221;295913;295923;295927;295935;295936;248284;248285;248286;248287;248289;248296;248297;248311;281854;281857;284599;284608;284609;308449;321063	XP_002292744.1	RS2, ribosomal protein 2 [Thalassiosira pseudonana CCMP1335]	0.577432	6	0.00569943	0.0440789	0.661056	5	0.00189981	0.0316987	0.521367	6	0.0009999	0.011926	0.642568	6	0.0019998	0.0243489	0.700563	6	0.010199	0.0696158	0.525968	5	0.0001	0.0016362	0.781467	6	0.0235976	0.168742	0.474762	6	0.0122988	0.069219	1.0373	6	0.79572	0.95303	0.963059	6	0.862414
321	EED90182.1	1292	101765	NIDQVLLELK;ASMIWIIGEYAER;LVVLGDKPVIEDDTFR;LAPPLVTLLNSEPEIQYVALR	1;1;1;1	4	6	235608;246821;250382;333191;333193;347916	XP_002292207.1	beta subunit of tetrameric clathrin adaptor complex AP1 [Thalassiosira pseudonana CCMP1335]	0.685114	5	0.00559944	0.0436805	1.02386	6	0.755224	0.912141	0.616415	6	0.0273973	0.138602	1.02777	6	0.874713	0.962291	0.746675	6	0.00939906	0.0659031	0.775187	6	0.00829917	0.0478798	0.958744	4	0.512249	0.82179	1.02327	6	0.870313	0.961647	1.23525	6	0.123188	0.43032	0.958857	6	0.79862
322	EED91649.1	1042	16102	YPLTTESSMK	1	1	6	228772;228773;228774;228779;232632;292271	XP_002291542.1;EJK65394.1	RL23a, ribosomal protein 23a 60S large ribosomal subunit [Thalassiosira pseudonana CCMP1335]	0.551264	5	0.0001	0.00219734	0.549522	5	0.00019998	0.00621317	0.452473	5	0.0001	0.00211861	0.561354	6	0.00159984	0.0201602	0.669058	5	0.0001	0.00219734	0.35935	6	0.0001	0.0016362	0.655458	6	0.00059994	0.0124263	0.322095	5	0.0001	0.00166743	0.83677	6	0.176382	0.514282	0.839226	6	0.122088
323	EED91929.1	1301	44081	AFVLFPK;AGADIILTYYAK;TNLACEAYNPEGIVHR;DALDSHPGFGDKK;DALDSEGFTNVSILSYTAK	1;0;0;0;0	1	6	134081;134082;134084;134085;134086;134087;260211;260212;260213;260214;302512;302517;302518;302528;302529;335419;320926;347842;347843;347846;347849;347852	XP_002290177.1	predicted protein [Thalassiosira pseudonana CCMP1335]	1.54676	6	0.00239976	0.0248527	0.84518	6	0.10379	0.414698	1.92166	5	0.00039996	0.00610447	0.962187	6	0.544846	0.841312	1.51639	6	0.00019998	0.00371509	1.55233	6	0.00189981	0.0162069	1.28974	5	0.00929907	0.092071	1.37574	5	0.00389961	0.0292633	1.05174	6	0.424858	0.777537	1.26884	6	0.190881
324	EED92818.1	1524	42515.5	GHSLESIMASIEAR;VSGLTALNTAEQK;KVSGLTALNTAEQK	0;1;1	2	6	71723;238132;238137;238141;238142;238161;238162;241896;241898;266812;266813;328492;328493;328494;328495	XP_002289281.1	phosphoribulokinase [Thalassiosira pseudonana CCMP1335]	1.57532	5	0.00429957	0.0365463	1.41749	6	0.00439956	0.0550556	1.9921	6	0.00259974	0.0253088	1.61439	6	0.00049995	0.0091001	2.2335	6	0.00149985	0.0159925	1.44387	6	0.060194	0.215406	1.36032	6	0.00969903	0.0939659	0.904483	6	0.145985	0.398363	1.4513	6	0.00069993	0.012225	2.04718	5	0.0001
325	EED93297.1	1492	32540.7	FTGWVDVPLSPK	1	1	6	269439;269440;269441;269445;269446;269448	XP_002289760.1	phosphoglycerate mutase [Thalassiosira pseudonana CCMP1335]	1.38557	6	0.00719928	0.0512771	1.00124	6	0.984702	0.995041	2.21376	6	0.00029997	0.00478094	1.58072	6	0.00339966	0.0362496	1.77649	6	0.00119988	0.0139496	2.52704	6	0.00059994	0.00638989	1.71711	5	0.0001	0.00367718	2.39291	6	0.00019998	0.00262893	0.613496	6	0.00659934	0.060265	0.636929	6	0.00349965
326	EED93777.1	1730	40988.2	GEVLLLENTR;LPVIESLLEK;VDLNVPLSK	1;1;1	3	6	22421;139805;139809;59893;225133;185572	XP_002288341.1	phosphoglycerate kinase [Thalassiosira pseudonana CCMP1335]	1.42231	5	0.00229977	0.0243776	1.46096	6	0.00039996	0.0105989	1.07969	5	0.491451	0.778771	1.41683	6	0.106489	0.371843	1.14558	6	0.253875	0.593362	1.14023	6	0.411759	0.693688	1.4433	6	0.0128987	0.113383	1.50186	6	0.0227977	0.110969	1.44293	5	0.00249975	0.0308017	1.11099	5	0.224478
327	EED94112.1	310	77429.1	LGMDMDVANELMR;VFDSDTINLLGYFPR;KLGMDMDVANELMR;LYDLVVIGGGPAGVAGAIK	1;1;1;1	4	6	236767;236769;288469;327778;313007;329081	XP_002288676.1	predicted protein [Thalassiosira pseudonana CCMP1335]	1.31773	6	0.0620938	0.244308	1.42985	5	0.00119988	0.0220631	1.2618	6	0.0464953	0.197962	1.30783	6	0.0382962	0.200492	1.1693	6	0.142886	0.420621	1.18344	5	0.0979902	0.29058	0.889639	6	0.0220978	0.162532	0.771224	6	0.0385961	0.160907	1.46177	6	0.0670933	0.3048	1.96778	6	0.00789921
328	EED94476.1	628	35058	VTYATDAVK;VLFLTDIAGVLDK;IVVVHGGGPMINAMLEK	1;1;1	3	6	180431;180436;280442;280444;328572;330097	XP_002289040.1	predicted protein [Thalassiosira pseudonana CCMP1335]	1.4904	6	0.0737926	0.273048	1.11517	4	0.159284	0.523777	1.41096	6	0.137486	0.406589	1.1945	5	0.0850915	0.324175	1.24019	6	0.0210979	0.116264	1.29681	6	0.0546945	0.200509	1.11405	6	0.0551945	0.288291	1.18026	6	0.105089	0.324703	1.17535	6	0.189681	0.527987	1.28196	6	0.0444956
329	EED95251.1	658	21809.3	DGFQWLSQFLS;ILFLGLDNAGK;YALGLLDTYGK;VQAHVPTLHPNTDELIVGQLK	1;1;1;1	4	6	195926;229919;242223;242224;242225;359315	XP_002287808.1	arf-type small G protein [Thalassiosira pseudonana CCMP1335]	1.04255	5	0.635136	0.867604	0.990493	5	0.865813	0.949593	0.978865	4	0.865213	0.945649	0.991688	6	0.892711	0.970516	1.37857	5	0.00079992	0.0102961	1.24506	4	0.0883912	0.273845	1.15047	6	0.0272973	0.185621	1.03856	5	0.646835	0.863566	0.751967	5	0.00529947	0.0515338	0.854575	5	0.116588
330	EED95457.1	1658	85381.2	GAAMSLLTEAYQSR;DLTIAPSQIQYLCEEAIR	1;1	2	6	237501;241245;241246;241247;333141;333158	XP_002288014.1	predicted protein [Thalassiosira pseudonana CCMP1335]	0.685477	6	0.0792921	0.284064	0.921319	6	0.29777	0.67169	0.546006	6	0.0306969	0.149017	0.73405	6	0.0125987	0.0941692	0.997126	6	0.966703	0.988649	0.57797	6	0.00059994	0.00638989	0.895208	6	0.333467	0.71282	0.504866	6	0.0173983	0.091088	1.06231	6	0.686131	0.915957	1.156	5	0.114589
331	EED95591.1	1759	133008	IWHGQVTK;SPSTTGAGSEGALTK;VDHDISLLIPEVWCR;LFQRPDDAIYPGFDK	1;1;1;1	4	6	180747;272734;272735;303729;303733;330149	XP_002285950.1	predicted protein [Thalassiosira pseudonana CCMP1335]	0.817672	5	0.229777	0.531988	0.863458	6	0.20028	0.574348	0.860109	6	0.505249	0.786477	0.973348	5	0.743226	0.913606	0.758141	6	0.00519948	0.0423958	0.450239	6	0.00089991	0.00925622	0.70458	5	0.00029997	0.00772209	0.428831	6	0.0001	0.00166743	0.998891	6	0.993301	0.997683	1.04804	6	0.824318
332	EED95922.1	1444	120007	LEPAYGADVLR;LWVASVDYAGDVR;GELSGCMIGVK;ATAQWFASVEGFR;KLEPAYGADVLR;SWGVPIPVFYDK	0;1;1;1;0;0	3	6	158588;226510;226511;227467;230943;230959;230960;266820;266825;281048;281049;281050	XP_002286281.1	isoleucine-trna synthetase [Thalassiosira pseudonana CCMP1335]	1.6325	6	0.00269973	0.0267303	0.623106	6	0.377462	0.705205	1.40561	6	0.039596	0.176954	0.539319	6	0.314869	0.67739	0.768156	5	0.0161984	0.0966539	1.10239	5	0.470253	0.734084	0.860541	5	0.0211979	0.157845	1.21569	5	0.0811919	0.272811	1.46719	4	0.00439956	0.0457503	1.26062	6	0.0923908
333	EED96059.1	67	41798.4	VGVPLDQVEWVIMR	1	1	6	267596;270704;270718;270720;270721;270731	XP_002286418.1	26S proteasome regulatory subunit [Thalassiosira pseudonana CCMP1335]	1.09462	6	0.456354	0.757395	1.05169	6	0.489251	0.782281	0.9143	6	0.279272	0.598992	0.918896	6	0.258774	0.618824	0.766677	5	0.0189981	0.107656	0.957262	5	0.612539	0.822813	0.94982	6	0.424658	0.775677	0.997295	6	0.980302	0.991864	1.20621	5	0.126087	0.433712	1.10636	5	0.330867
334	EJK43717.1	486	67117.6	NQVLFER;WQEGFWATMK;DTIHIEGIELGYK;SGGDLQHLISDAATMQLIR;EFEASHGTVTDLWLDHLAGK;WTDGGFGMAAHNYDGDMLTDQIAQVHR	0;0;0;1;1;0	2	6	70480;257019;294164;294165;294168;324248;324249;325884;356597;356598;356599;366312	-	hypothetical protein THAOC_37807 [Thalassiosira oceanica]	1.12495	6	0.323568	0.642431	1.0047	6	0.948005	0.978972	1.24172	6	0.230977	0.53608	0.99796	5	0.980202	0.995112	1.19037	6	0.00869913	0.0614739	1.28795	5	0.0306969	0.131558	1.45668	6	0.00459954	0.0527922	1.48557	6	0.0140986	0.0769441	0.874246	6	0.391561	0.755466	0.583644	5	0.00269973
335	EJK44401.1	153	36902.7	GEAMQAASDAIDTGMVSVIGLSK;LDSTVVSQPAIFVASMAAVEK	1;0	1	6	264237;358000;358001;358002;358003;358567;354053;354054;354693	-	hypothetical protein THAOC_37058 [Thalassiosira oceanica]	1.32782	8	0.00019998	0.00367718	1.09698	9	0.040096	0.235352	1.3745	9	0.0222978	0.121324	1.19235	9	0.089691	0.333932	1.16728	8	0.0985901	0.339429	0.947877	9	0.757724	0.907454	0.931488	9	0.364664	0.742513	0.719803	8	0.00349965	0.0278888	1.34668	9	0.00519948	0.0508362	1.67725	8	0.0001
336	EJK44669.1	1084	36163.8	TLSDFALGK;HLPLLDEDGGVVGIVSIK	1;1	2	6	175232;175239;336771;336772;336775;336776	-	hypothetical protein THAOC_36775, partial [Thalassiosira oceanica]	0.864972	6	0.163584	0.446502	1.05954	6	0.252875	0.632252	0.967895	6	0.845915	0.939443	1.19703	6	0.140986	0.442607	0.944987	6	0.714529	0.913689	1.14287	4	0.248675	0.521678	1.07304	6	0.467153	0.80909	1.31925	6	0.00369963	0.0283533	0.860552	6	0.150385	0.477147	0.748474	6	0.00349965
337	EJK45128.1	194	110747	FCDAMLAIR;LCGSDLCVPK;SAHGTNPASAAMAGMK;SYIGMGYYDTIVPNVILR;FFVSQDVHPQTISLIQTR;DLALNHSMISLGSCTMK;FGVPMGFGGPHAGFLSTSDK;NMLENPGWYTAYTPYQAEIAQGR	1;0;0;0;1;0;1;1	4	6	18422;226985;226993;296429;296430;296433;329030;330477;330480;332791;332797;337936;346595;360985;360987	-	hypothetical protein THAOC_36273 [Thalassiosira oceanica]	1.02047	6	0.90301	0.979075	0.987803	6	0.909209	0.966605	0.824427	5	0.134587	0.400645	0.963853	6	0.727427	0.907011	1.09101	6	0.49655	0.804662	1.2372	6	0.250175	0.521678	1.08994	6	0.559544	0.846598	1.23327	6	0.464354	0.751555	0.67675	6	0.0556944	0.269339	0.666307	6	0.0748925
338	EJK45149.1	698	57765.6	AQASAVFHVAK;VAQGVSGAVQDK;YGVPILADGGIK;QLLVGAAIGTRPEDR;LPVVNDNDELVALIAR	1;0;1;1;1	4	6	222190;229276;229278;239785;239786;258686;287647;287649	-	hypothetical protein THAOC_36256 [Thalassiosira oceanica]	1.51826	5	0.00139986	0.0163802	1.41774	6	0.0216978	0.154644	1.43455	6	0.0276972	0.139337	1.47994	4	0.00409959	0.0419742	0.808228	5	0.0107989	0.0718068	1.09939	6	0.234477	0.503049	0.888805	5	0.0455954	0.260009	1.21825	4	0.0886911	0.289371	1.27853	6	0.0833917	0.342515	1.16789	6	0.373663
339	EJK45703.1	950	98850.2	TVWEIPQR;SNQQNLGTIK;YVDQGGGK;VLAGEFTVVNK;DFEFDYFGFK	0;0;0;1;1	2	6	104853;104854;215839;215842;215846;221995;233703;233704;233705;233706;263234;263240	-	hypothetical protein THAOC_35666, partial [Thalassiosira oceanica]	0.3961	12	0.0001	0.00219734	0.740837	12	0.00249975	0.0372277	0.389813	12	0.0001	0.00211861	0.773828	11	0.00019998	0.00462005	0.424249	12	0.0001	0.00219734	0.248091	12	0.0001	0.0016362	0.720807	12	0.00049995	0.0111223	0.421893	12	0.0001	0.00166743	1.23657	12	0.019798	0.137679	0.827813	11	0.0104989
340	EJK47228.1	1281	158014	NLVQEFITK;ETANFEFPLITK;LIDSANAPIFGVDTQGR;LIDTANAPIFGVDTQGR;RNEQGNVIGVVGIGQDITAR;RDEQGNVIGVVGIGQDITAR	1;1;1;0;1;0	4	6	213302;213303;213304;281433;291131;293436;293439;331091;331167	-	hypothetical protein THAOC_34070, partial [Thalassiosira oceanica]	1.3076	6	0.0572943	0.232701	1.05609	6	0.248975	0.626611	1.2485	6	0.224678	0.530333	1.01795	6	0.866713	0.956266	0.760786	6	0.00089991	0.0111837	0.773834	5	0.0210979	0.101418	0.860561	6	0.0216978	0.160903	0.897396	6	0.119588	0.351925	1.22233	6	0.0907909	0.356622	1.10423	6	0.375162
341	EJK49332.1	1785	37488.3	FVDLTADIR;WGVVHAK	1;1	2	6	110850;110876;126180;126184;126185;126194	-	hypothetical protein THAOC_31798 [Thalassiosira oceanica]	1.14694	6	0.110589	0.34932	0.758346	6	0.164384	0.529909	1.40421	6	0.00839916	0.0595547	0.89756	6	0.639536	0.889231	0.968401	6	0.573743	0.847681	1.99619	5	0.0001	0.0016362	1.37999	6	0.00729927	0.0760305	2.62858	6	0.0001	0.00166743	0.612701	6	0.0059994	0.0565074	0.417836	6	0.00089991
342	EJK52637.1	1088	66268.6	LHMYDCLR;AMSAWGVEPR;ASTPMYLMSR;GMYSVIMYDK;EQFSDGVGYGWVDSLK;TPLYIGWGNDGSVYVASEMK	0;0;0;1;1;1	3	6	128192;131976;143703;143706;143710;148699;148701;240592;240593;330557;330562;355075;355735	-	hypothetical protein THAOC_28062 [Thalassiosira oceanica]	1.28112	5	0.0361964	0.172555	1.13509	6	0.155484	0.518857	1.46029	5	0.0049995	0.0407425	1.32597	6	0.00269973	0.0304057	1.19466	6	0.110589	0.364317	0.959264	5	0.782122	0.921023	1.16084	6	0.273273	0.65432	1.1092	6	0.640136	0.857164	0.848118	5	0.0673933	0.305392	0.931192	6	0.653235
343	EJK53532.1	1029	77283.5	LAAFYER;VSCLGSPDR;VVMEVAK;LPGNVPLITGLR;TTLVANTSNMPVAAR;FSNSDVIVYVGCGER;IIVPPNVYGTVTK;EASIYTGITLAEYFR;LGEMPADSGYPAYLGAR;YMQVLEPYFNNMDPR;VSGPLVVADNMSGAAMYELVR	0;0;0;0;0;0;1;0;0;0;1	2	6	61612;61629;93668;93670;93672;119962;119966;173194;173214;173215;173216;173220;248467;248468;248475;251826;251827;279188;279189;279195;279945;279946;279947;284800;284803;325548;290118;290119;290122;290126;292681;292682;292684;292685;328791;328796;330270;330272;311676;313652;313654;315553;337729;337730;339947	-	hypothetical protein THAOC_27014 [Thalassiosira oceanica]	1.31805	6	0.0592941	0.236913	1.27845	6	0.0233977	0.160314	1.72159	6	0.00969903	0.0666716	1.71189	6	0.0009999	0.0146489	1.23534	6	0.0809919	0.303425	0.990254	6	0.952405	0.981861	1.11606	6	0.325867	0.710065	0.88292	6	0.344266	0.652537	1.12701	6	0.221978	0.572891	1.24322	6	0.060394
344	EJK55405.1	1393	21528.7	EGSDVTIVTFSK;SIRPLDRDTIIDSVK	1;1	2	6	256867;256886;256892;256901;324972;324974	-	hypothetical protein THAOC_24865, partial [Thalassiosira oceanica]	1.25417	6	0.158584	0.438969	1.16987	6	0.0138986	0.115713	1.15174	6	0.392961	0.706889	1.0854	6	0.194581	0.537235	1.04841	6	0.39596	0.732186	1.24156	6	0.0287971	0.125813	1.03048	6	0.738126	0.921249	1.22546	6	0.0778922	0.266699	1.10386	6	0.133187	0.448694	1.11411	6	0.238276
345	EJK58387.1	1594	85152.9	GLTTFQHWPIR;FTPETWGGFMK;DGTDEVMSLLAIK	1;1;1	3	6	203228;260473;260493;263611;278115;278118	-	hypothetical protein THAOC_21493 [Thalassiosira oceanica]	1.00972	4	0.915108	0.979399	1.03411	5	0.557444	0.828124	0.944781	4	0.651435	0.875029	0.992516	5	0.927707	0.974201	0.829681	6	0.0117988	0.076206	0.681855	6	0.00059994	0.00638989	1.07314	5	0.180782	0.537573	0.89318	5	0.386661	0.687634	1.1003	5	0.229977	0.578641	1.06209	6	0.544246
346	EJK58753.1	1045	24025.1	MALSEGLK;VMLCIGEK	1;1	2	6	142521;142523;142524;174489;174491;179807	-	hypothetical protein THAOC_21096 [Thalassiosira oceanica]	0.936526	6	0.29647	0.613969	0.628428	6	0.0001	0.00353298	0.966092	6	0.711329	0.895383	0.644197	6	0.0001	0.00261133	1.49537	6	0.00019998	0.00371509	1.3763	6	0.00269973	0.0212206	1.35587	6	0.0001	0.00367718	1.25223	4	0.0579942	0.217599	0.479491	5	0.0001	0.0035271	0.523027	5	0.0001
347	EJK60373.1	1464	21582.6	VADISLADYGR;KAEDAFLK;LLEAGETDKWNK;WCSCNIFSTQDHAAAAIAR	0;0;1;0	1	6	151001;151008;151011;151012;151016;151024;151030;234307;245052;245053;245054;245060;245061;245062;245064;245068;322796;322797;322800;322801;322810;322811;337713;337717	-	hypothetical protein THAOC_19286, partial [Thalassiosira oceanica]	1.17128	4	0.141386	0.408952	0.79421	6	0.0089991	0.0876561	1.63705	6	0.00029997	0.00478094	1.16198	5	0.0637936	0.277672	1.02954	5	0.635136	0.881629	1.71414	6	0.0001	0.0016362	1.21794	6	0.00139986	0.0244908	2.07217	6	0.0001	0.00166743	0.355238	6	0.0001	0.0035271	0.291697	6	0.0001
348	EJK60670.1	402	24034.1	FVSLISSTPSVR;TLQESVASELAAR	1;0	1	6	186812;186813;186827;186828;186829;186833;207984;207985;207987;207990;207991;207992	EJK68017.1	hypothetical protein THAOC_18936, partial [Thalassiosira oceanica]	0.521914	5	0.0001	0.00219734	0.723913	6	0.00269973	0.0377125	0.434882	5	0.0001	0.00211861	0.597154	6	0.00149985	0.019728	1.49569	6	0.0108989	0.0722053	0.497076	6	0.0001	0.0016362	1.01158	5	0.808419	0.958842	0.314315	6	0.00179982	0.0162888	1.36555	6	0.0452955	0.234832	2.11779	6	0.00949905
349	EJK66241.1	1286	12619.7	DLPPQSIGGR	1	1	6	108015;108027;108028;108036;108043;108044	EED89937.1;XP_002292741.1	hypothetical protein THAOC_12850 [Thalassiosira oceanica]	0.415107	6	0.00179982	0.0197761	0.704163	5	0.00069993	0.014666	0.316998	6	0.00249975	0.0247365	0.482862	6	0.00429957	0.0435271	0.751139	5	0.00229977	0.0225227	0.43316	6	0.00509949	0.0342503	0.763328	6	0.0151985	0.123926	0.47466	6	0.0059994	0.0390069	1.13655	5	0.134587	0.451042	0.988013	5	0.887511
350	EJK66267.1	1690	81266.4	DLAILPR;LIADMPNVFR;FEGSQLPSSVLR;SITLVDTPGILSGEK	0;1;0;1	2	6	45917;149732;149733;154681;154694;193794;301124;301138	-	hypothetical protein THAOC_12827 [Thalassiosira oceanica]	0.667764	6	0.00089991	0.0113401	0.878437	6	0.0355964	0.217065	0.735346	6	0.00679932	0.0508115	0.866456	5	0.0749925	0.304361	0.710379	6	0.0188981	0.107656	0.818313	6	0.0827917	0.261448	0.896514	6	0.140786	0.479352	1.03065	6	0.779222	0.919645	1.30444	5	0.0239976	0.154185	0.962553	6	0.825617
351	EJK70830.1	315	35525.2	ADEIFGWLK;NQYAGINFIDTYHR;GIFISFGNASGAVPAFPVLR	0;1;0	1	6	209936;209937;209938;209939;280961;280964;280968;323113;323116;323120;323651	-	hypothetical protein THAOC_07781, partial [Thalassiosira oceanica]	1.10641	6	0.337466	0.655684	1.10313	6	0.267773	0.64337	1.10226	5	0.324868	0.654862	1.18	6	0.0775922	0.310424	1.1428	5	0.060194	0.252255	1.08596	6	0.519948	0.764629	1.17835	6	0.0286971	0.192956	0.95441	5	0.724828	0.901278	0.965751	6	0.812419	0.95334	0.949597	6	0.757924
352	EJK71347.1	736	33228.4	GYMEPMLK;YIDPTYTYK	1;1	2	6	180595;180624;180626;180631;180637;230538	EED92086.1;XP_002290334.1	hypothetical protein THAOC_07228 [Thalassiosira oceanica]	1.52523	6	0.00309969	0.0295537	1.1291	5	0.0643936	0.311092	2.22076	6	0.00089991	0.0111009	1.67031	5	0.00039996	0.00750758	1.37265	5	0.00079992	0.0102961	2.19213	6	0.0001	0.0016362	1.39668	5	0.00029997	0.00772209	2.07384	5	0.0001	0.00166743	0.482723	5	0.0001	0.0035271	0.493308	6	0.0001
353	EJK71823.1	596	21752.8	LVGEYGLR;IFEGAALLR;HIDISANSPYGQGAPGR	0;1;1	2	6	70761;93560;285654;285655;285657;326100;326101	-	hypothetical protein THAOC_06697 [Thalassiosira oceanica]	0.524846	7	0.0218978	0.121415	0.829042	7	0.0750925	0.34303	0.349694	7	0.0358964	0.167053	0.744384	6	0.133387	0.428454	0.697329	7	0.119888	0.37968	0.468855	7	0.0277972	0.122635	0.722193	7	0.20388	0.575738	0.478661	7	0.0514949	0.198591	0.981047	7	0.90331	0.979117	0.962169	7	0.828017
354	EJK71956.1	89	15421	FLDGIYVSEK;FVYSHFPINVTQNGNTVEIR;KFLDGIYVSEK	0;1;0	1	6	64776;232188;232189;232194;232195;227660;347829;347831;347833;347834;347835;310588;310589;310590;310591	-	hypothetical protein THAOC_06555 [Thalassiosira oceanica]	0.717034	6	0.0551945	0.228011	0.968451	6	0.820918	0.933402	0.676695	6	0.0646935	0.247374	0.934813	6	0.744426	0.913606	1.09314	6	0.141686	0.417869	0.711404	4	0.019898	0.0978163	0.801948	6	0.00169983	0.0268692	0.520832	5	0.0001	0.00166743	0.680458	5	0.0442956	0.232326	1.08935	6	0.724028
355	EJK72094.1	540	114178	FLMSDGSR;CNDLLLLR;FFNTNNLWIR;TFCGTETPTVIT;FFGNLMDSK;KEFGQNVK;SMPTSGAVDLVAK;DLNLDFFETPTGWK;YMFVSNSDNLGATLDLK	0;0;0;0;0;1;0;0;0	1	6	72229;101194;101195;101204;101205;195125;195646;195647;204893;204894;204895;208898;208899;251148;251149;251150;251151;251154;251155;255494;255495;255499;255503;258649;258653;258659;319999;320000;320001;320002;320003;320004;338651	-	hypothetical protein THAOC_06412 [Thalassiosira oceanica]	1.12793	25	0.00089991	0.0113401	1.14106	27	0.00089991	0.0178202	1.22559	26	0.0001	0.00211861	1.25581	26	0.0001	0.00261133	0.989025	27	0.79772	0.928013	1.14896	27	0.0245975	0.111807	1.02892	26	0.319368	0.706137	1.18091	27	0.00069993	0.00732892	0.86216	27	0.0233977	0.151958	0.835546	27	0.00589941
356	EJK72358.1	930	43091.7	TPMVATLK;ACYDLDVHGK;FTPSVIEPSFGMGR;FKPAVAPQK	1;0;1;1	3	6	146412;233794;243698;243700;243712;243713;258325	-	hypothetical protein THAOC_06118 [Thalassiosira oceanica]	0.919646	5	0.282572	0.600394	1.16034	5	0.0313969	0.200628	0.833921	6	0.155484	0.440295	0.994257	6	0.957104	0.987138	0.792799	6	0.00569943	0.0448488	1.04808	6	0.619238	0.825682	0.974196	5	0.59594	0.867044	1.24535	6	0.194281	0.466489	1.13614	5	0.208579	0.557475	0.912041	5	0.556044
357	EJK72439.1	667	91753	TSPFPYGGAR;GANTYCHWFQPMAASGVR;DTHTAGGYLALDTSSPIFLR;AVGSSQNVSMVNTVLNTIVAEK	0;1;1;0	2	6	111631;111644;111647;111648;111658;111659;111661;328503;334428;334429;334435;334436;334437;357753;357754;357755;357756;357757;358322;358324;358325;358326;358329;358330;358331;358334;358335;358336	-	hypothetical protein THAOC_06032 [Thalassiosira oceanica]	0.735537	6	0.323968	0.642431	0.741069	6	0.394661	0.718198	0.979333	4	0.867813	0.946303	0.928902	6	0.657334	0.891065	0.998118	5	0.990201	0.995171	0.917841	6	0.625437	0.828394	1.07002	6	0.613939	0.874702	0.836936	6	0.290671	0.594822	0.774357	6	0.444356	0.786033	0.840729	6	0.631937
358	EJK75419.1	1540	29379.6	IVGTPNQDNPLMK;RPEYVSNWWNVVNWDK	1;0	1	6	284334;284348;284354;284359;286953;286958;350819;350823;350824;350825	-	hypothetical protein THAOC_02860 [Thalassiosira oceanica]	1.42316	9	0.00019998	0.00367718	1.02119	10	0.807019	0.926863	1.4798	10	0.00209979	0.021734	1.12068	10	0.364464	0.710014	1.86222	10	0.00019998	0.00371509	1.72377	10	0.0001	0.0016362	1.03746	10	0.589741	0.863293	0.954197	10	0.546845	0.805948	0.767478	10	0.0653935	0.301648	1.34577	10	0.0224978
359	EJK76253.1	145	168146	APMFSFTR;SVGEVMSIGR;SFPFVSK;RLEDNFIMR;IMGVDCGMK;AASSLGDWLK;ATGYPLAFVAAK;TMGVDFIEAATK;FGLPAMFESYK;FSDMIDEIGVQQPR;IGSSIEFDWCGVSAIR	0;0;0;1;0;0;0;0;0;1;0	2	6	88492;106581;111096;111099;130957;155245;155254;155256;160458;160464;192510;202141;241198;241199;241200;256848;256861;260141;258211;258218;261541;261550;266417;294882;294885;294886	-	hypothetical protein THAOC_01996 [Thalassiosira oceanica]	0.568571	5	0.00049995	0.00763483	0.838325	6	0.0779922	0.349186	0.634442	6	0.00029997	0.00478094	0.843079	6	0.30007	0.665919	1.13645	6	0.169283	0.467149	1.01485	6	0.910509	0.969773	1.0951	6	0.211679	0.580586	0.996126	6	0.965103	0.987586	0.769336	6	0.0558944	0.269582	0.819138	5	0.0440956
360	EJK77692.1	610	18150.3	ASNIVEDLGTLR;VEGLLAAFPK	1;1	2	6	185240;185259;185260;185268;201438;201439	EED94881.1;XP_002287438.1	hypothetical protein THAOC_00461, partial [Thalassiosira oceanica]	0.893208	5	0.161484	0.443588	0.981728	6	0.874013	0.953168	0.848906	6	0.0629937	0.243053	0.86526	6	0.258074	0.618417	0.796125	4	0.0238976	0.127407	0.950833	5	0.558544	0.786823	0.854086	6	0.0864914	0.374657	0.926363	6	0.580842	0.824347	1.27934	6	0.00449955	0.0462554	1.22023	6	0.0792921
361	XP_002287533.1	1768	28049.1	QSYAEITATQR;LYEGMQALEAK	1;1	2	6	178921;253945;253952;250825;250826;250833	EED94976.1;EJK65858.1	predicted protein [Thalassiosira pseudonana CCMP1335]	0.987914	6	0.881312	0.972895	0.969287	6	0.590341	0.850931	1.05497	6	0.587841	0.839573	1.03547	6	0.706729	0.903334	0.894359	6	0.346965	0.697803	0.991517	4	0.942806	0.976513	0.856926	6	0.140986	0.479352	0.877966	5	0.133187	0.37954	0.837686	6	0.264874	0.624518	0.871014	6	0.379162
362	XP_002289528.1	1133	68132.5	YFCHDVR;NLGIGAQFGGK;TPEGYASGSFGPTTAGR;HGASCPVGIGVSCSADR;ILPGCQDTGTAIVMGK	1;1;1;1;1	5	6	188919;205691;270397;270398;284079;317455	EED93065.1	fumarate hydratase [Thalassiosira pseudonana CCMP1335]	1.28485	6	0.00819918	0.0557544	1.26186	6	0.0748925	0.34303	1.17888	6	0.356664	0.680458	1.14449	5	0.0912909	0.337795	0.916407	6	0.285771	0.635414	1.14819	6	0.459854	0.726085	1.04101	6	0.756124	0.932048	1.3211	6	0.0208979	0.10602	1.12547	6	0.136986	0.455015	1.14727	5	0.209479
363	XP_002289681.1	518	78618.1	GDSVLYATASR;LNLTVAGTK;EGITTFQLDIK;GETQVVATATLGDSGMR	1;1;1;1	4	6	138284;138285;164134;253377;253381;280479	EED93218.1	polyribonucleotide nucleotidyltransferase [Thalassiosira pseudonana CCMP1335]	1.36258	6	0.00419958	0.0358656	1.05683	6	0.442856	0.750421	1.1529	6	0.138286	0.407616	0.904385	6	0.179682	0.514765	1.10638	6	0.0984902	0.339429	1.41545	5	0.00659934	0.0404041	0.951308	6	0.388561	0.755158	1.30857	6	0.0473953	0.188015	0.868273	6	0.0454954	0.235032	1.00047	6	0.9958
364	XP_002290153.1	1605	48388.9	IQLFDYLK;QPASTVQILGAEK;MHLLFETPAGYSLFK	1;1;1	3	6	200169;200170;200171;268668;268669;327503	EED91905.1;EJK45623.1	SAR DNA-binding protein [Thalassiosira pseudonana CCMP1335]	0.836252	4	0.106289	0.341414	0.925512	6	0.130387	0.468042	0.558513	5	0.00049995	0.00714611	0.696187	4	0.00539946	0.049642	0.637835	6	0.00119988	0.0139496	0.575201	4	0.00239976	0.0194575	0.764421	6	0.0049995	0.0563069	0.674627	6	0.00359964	0.0283533	0.921667	6	0.626437	0.898837	0.787344	6	0.113989
365	XP_002290445.1	552	51884.5	ISPLGLAR;CGAGTNNVPVAR;GEGGTHGIIGK;ELVLCGLFLGSR;MTELGIPVFNTPGANANAVK	1;0;1;1;0	3	6	51821;162346;196536;205127;205129;205130;205134;348505	EED92197.1	D-3-phosphoglycerate dehydrogenase [Thalassiosira pseudonana CCMP1335]	1.61894	6	0.0049995	0.0407652	1.18023	6	0.132387	0.473112	1.07926	4	0.570143	0.833464	0.940573	5	0.70343	0.903334	0.846551	6	0.0564944	0.242817	1.0534	5	0.80192	0.927271	1.00228	6	0.971703	0.993143	1.29238	5	0.110789	0.335911	1.15075	6	0.167883	0.501698	0.893376	5	0.19878
366	XP_002293256.1	216	34051.4	LADFGLAR;APELLLGASR;TDLIGQGAYGTVYR;IPYADSTPEGGVPCNVIR;RIPYADSTPEGGVPCNVIR	0;1;1;1;1	4	6	60043;104328;241265;241280;241281;315153;331476	EED89717.1	cell division control protein 2-like protein, partial [Thalassiosira pseudonana CCMP1335]	0.736232	6	0.0332967	0.161292	1.06705	5	0.279272	0.653803	0.602154	6	0.0438956	0.189583	0.819781	6	0.29977	0.665919	0.852074	6	0.221378	0.539814	1.0374	6	0.833817	0.943689	0.98773	5	0.879312	0.97435	1.12011	6	0.223678	0.50804	1.30582	6	0.258974	0.618196	1.23183	6	0.143886
367	XP_002293335.1	1247	77340.7	AFPLYPK;TLYNNLELFR;ANIIAYWAPEHK;FAIIHAENPTSTK;VNEPGIPVEMLDVK	1;1;1;1;1	5	6	138509;183696;281936;284706;302604;302605	EED89071.1	predicted protein, partial [Thalassiosira pseudonana CCMP1335]	0.831561	6	0.216378	0.513554	0.73766	5	0.00249975	0.0372277	0.711056	5	0.00819918	0.0585981	0.695353	6	0.0321968	0.176886	0.86291	6	0.020198	0.112336	0.454708	5	0.0001	0.0016362	0.921594	6	0.467853	0.80909	0.450145	5	0.0001	0.00166743	0.924575	5	0.384462	0.750159	0.983808	6	0.889811
368	XP_002293655.1	1459	106906	SAGASYFVVGR;GADTVYAFQTR;VMYDITDNVMK;GATLWMTGCSGAGK	1;1;1;1	4	6	130202;166441;266003;266008;266014;279029	EED89391.1	ATP sulfurylase [Thalassiosira pseudonana CCMP1335]	1.029	5	0.706229	0.889326	0.934247	6	0.288871	0.662272	0.992219	6	0.940306	0.970585	0.856942	6	0.225277	0.585786	0.906455	5	0.326867	0.68173	0.925723	4	0.488551	0.744291	1.05634	6	0.481352	0.814524	0.995518	6	0.948005	0.98248	1.11499	5	0.178382	0.517378	1.00852	6	0.907509
369	XP_002294929.1	464	19367.7	SLTSNFFGR;FVTTIGVDYR;LLMVGDSSCGK	1;1;1	3	6	104798;104801;104802;104805;148228;231283	EED87709.1;EJK73035.1	predicted protein, partial [Thalassiosira pseudonana CCMP1335]	1.95799	6	0.00149985	0.0169983	1.73429	6	0.00069993	0.014666	1.69755	6	0.0384961	0.1742	1.54961	6	0.0162984	0.113396	1.0563	5	0.380362	0.723009	1.52328	6	0.029697	0.128497	1.08312	6	0.255574	0.636112	1.69081	6	0.00369963	0.0283533	1.50744	5	0.00039996	0.00827044	1.28745	6	0.0288971
370	XP_002295020.1	1310	32574	LIIPSLQVNLR;VYVGHDYQPGGR	1;1	2	6	178428;201006;201007;201026;269709;269712	EED87800.1	THAPSDRAFT_30659 [Thalassiosira pseudonana CCMP1335]	1.00313	6	0.966303	0.98641	1.23019	5	0.0749925	0.34303	1.514	6	0.0130987	0.0845546	1.69485	6	0.0320968	0.176886	1.90784	5	0.0001	0.00219734	1.6062	4	0.00539946	0.0350867	1.39349	6	0.059894	0.306616	1.21365	5	0.116688	0.347662	0.589058	5	0.0001	0.0035271	0.713159	6	0.0647935
371	XP_002295206.1	117	34361.2	VTASQAALLQK;GPTGCDPGQTAFFQTLQIATK	1;1	2	6	222536;222546;222547;222549;356974;356976	EED87510.1	predicted protein [Thalassiosira pseudonana CCMP1335]	1.15161	4	0.182382	0.465216	1.04983	6	0.50325	0.79479	1.03637	6	0.662634	0.879856	0.97732	6	0.839016	0.948499	0.823532	6	0.136886	0.409749	0.890474	6	0.146585	0.383474	0.973568	6	0.752425	0.929952	1.06042	6	0.387961	0.687634	0.735209	4	0.0155984	0.114803	0.624547	6	0.0107989
372	XP_002295570.1	239	29391.4	IQYGGSMK;EDWANVSIAYEPVWAIGTGLTATPEMAQETHANIR	1;1	2	6	153483;153485;158568;158577;158578;370163	ACI64287.1	triose-phosphate isomerase [Thalassiosira pseudonana CCMP1335]	0.859194	6	0.0366963	0.173107	0.693309	6	0.0534947	0.284804	0.881771	6	0.376462	0.694339	0.607626	5	0.00139986	0.0186855	0.963571	6	0.758624	0.921723	0.838149	6	0.0439956	0.171041	0.922199	6	0.437356	0.781555	0.803878	4	0.0648935	0.231891	0.941149	6	0.80152	0.95303	0.997805	6	0.992401
373	XP_002296775.1	792	35623.1	FDQSLIMEVR;SYDGLSGEGTVVFSR	1;1	2	6	169242;169247;254299;254300;254301;254302	EED86976.1	predicted protein [Thalassiosira pseudonana CCMP1335]	1.97903	5	0.00089991	0.0113401	1.49881	6	0.00049995	0.0123412	1.54226	5	0.00469953	0.0391845	1.45153	5	0.00109989	0.0154844	1.24975	6	0.0411959	0.194728	1.85426	6	0.00049995	0.00573191	1.00999	4	0.880012	0.97435	1.59234	5	0.00019998	0.00262893	0.998189	6	0.986101	0.994138	1.2505	6	0.0706929
374	YP_004072531.1	384	14848.1	AGLIIPVEISVYEDR	1	1	6	273960;273981;273982;273983;273984;273985	YP_009093161.1;ADB27485.1;AIR75834.1	50S ribosomal protein L11 (chloroplast) [Thalassiosira oceanica CCMP1005]	0.751053	6	0.00549945	0.043087	0.747903	6	0.0112989	0.102314	0.725225	6	0.010099	0.0685387	0.704416	6	0.00329967	0.0353929	1.02773	6	0.819718	0.932513	0.537545	6	0.00049995	0.00573191	0.922588	6	0.39646	0.756002	0.477925	6	0.00169983	0.0157804	0.896631	6	0.173883	0.50947	0.999602	6	0.9974
375	YP_004072578.1	249	7308.97	LGEILRPLNAEYGK	1	1	6	307017;307019;307020;307021;307022;307024	AIR75398.1;XP_002297544.1;EED86184.1;AIR75827.1;YP_009093427.1;YP_874510.1;YP_009093154.1;AIR76100.1;sp|A0T0P8.1|PSBH_THAPS;ABK20733.1;ADB27532.1;AIR75539.1	photosystem II reaction center protein H (chloroplast) [Thalassiosira oceanica CCMP1005]	0.440126	6	0.00109989	0.013302	0.838721	6	0.286171	0.661204	0.257857	6	0.00069993	0.0090041	0.50499	6	0.0154985	0.109522	0.829046	6	0.0231977	0.12591	0.412192	5	0.0001	0.0016362	0.884405	6	0.390261	0.755158	0.359665	6	0.00279972	0.0234525	1.29072	6	0.0319968	0.188112	1.21907	6	0.0722928
376	AAZ99425.1	323	22504.5	ILTDYGFEGHPLR;DFPLSGFVEMK	1;1	2	5	242100;242149;242150;242151;254368	YP_316618.1;YP_009186127.1;ALO71440.1	NADH dehydrogenase subunit 9 (mitochondrion) [Thalassiosira pseudonana]	1.21414	5	0.220178	0.514605	1.21126	5	0.0132987	0.113354	1.02419	4	0.875012	0.949336	1.26993	4	0.0350965	0.187667	1.03433	4	0.670833	0.8989	0.955806	3	0.763724	0.912211	1.02153	5	0.772423	0.94175	0.891846	5	0.179982	0.447718	1.38656	4	0.0365963	0.207034	1.49695	5	0.109989
377	ABK20837.1	689	102409	FFRPEFLNR;LIGATTLDEYR;GTGFVASEIPFTPR;NNPVLVGEAGVGK;KNNPVLVGEAGVGK	0;1;0;0;0	1	5	165577;173813;173814;173818;173821;173829;233119;233123;233124;251124;251126;251130;320414	YP_874614.1	ATP-dependent clp protease ATP-binding subunit (chloroplast) [Thalassiosira pseudonana]	0.557964	5	0.00349965	0.0326755	0.937292	5	0.356464	0.693681	0.401686	4	0.00019998	0.00360164	0.785013	3	0.0889911	0.332385	0.824933	5	0.0161984	0.0966539	0.565677	5	0.00049995	0.00573191	0.745493	5	0.0211979	0.157845	0.496617	5	0.00209979	0.0183579	1.00717	5	0.919808	0.985949	1.14073	5	0.469353
378	ACI64273.1	1421	59039.4	VVDALNATR;AVAAGMNPLDVR;ALLYCSTK;NAIIAQPYGPPK;GVDLLADAVQVTLGPK	0;0;1;1;1	3	5	84728;84730;84732;84733;161823;161827;161838;166667;166668;166686;176390;254260;254261;254267;309709	XP_002295556.1	mitochondrial chaperonin [Thalassiosira pseudonana CCMP1335]	0.891746	3	0.40216	0.713982	0.610873	5	0.00289971	0.0398876	0.867941	5	0.165283	0.455858	0.59835	3	0.00389961	0.0403856	0.746885	4	0.00779922	0.0568996	1.0217	4	0.850115	0.94691	0.766368	4	0.00379962	0.0465777	1.04485	4	0.679532	0.885511	0.955574	4	0.672233	0.912715	0.89466	5	0.40306
379	ACI64326.1	906	22711.4	FLPHIEQK;TYEAITHYGEAIK	1;1	2	5	192865;295454;295455;295459;295460	sp|B5YM03.1|CYNS_THAPS;XP_002295609.1	cyanate lyase [Thalassiosira pseudonana CCMP1335]	1.06204	3	0.654135	0.8711	0.715025	5	0.00459954	0.0560025	1.3367	3	0.117588	0.371518	0.987143	3	0.919208	0.97334	1.29099	5	0.0584942	0.247433	1.14683	5	0.178782	0.4308	1.15482	4	0.138486	0.477499	1.05819	4	0.593741	0.829858	0.649364	4	0.0019998	0.0270499	0.748693	4	0.0461954
380	AFO84270.1	13	36918.9	AGNSTYAR;DTDVLALFR;VVYEGLK;ASAATGEVK;IPHSYLK;LTELEVNLPFG;AVAALRLEDMR;ENDMILHLHR;VKDTDVLALFR;GGLDFLKDDENINSQPFMR;GGLDFLKDDENINSQPFMRWR	0;0;0;0;0;1;0;0;1;0;0	2	5	54669;54670;110836;110853;110854;110855;110856;110867;110868;110871;110873;110874;110880;110881;110882;110883;110884;110885;110886;110888;110889;110890;110891;110892;110893;110895;110896;110897;110898;129749;129778;129784;137794;137799;137802;137805;137809;137813;145418;167372;167425;167427;171482;182022;182065;182066;182068;182070;182071;182074;182077;182078;182079;182086;182087;182092;182094;18…	-	ribulose-1,5-bisphosphate carboxylase/oxygenase large subunit, partial (chloroplast) [Cyclotella striata]	1.5607	20	0.0001	0.00219734	0.793954	21	0.0221978	0.156252	1.97228	19	0.0001	0.00211861	0.95347	19	0.505949	0.818906	1.72856	21	0.0001	0.00219734	1.31254	20	0.00309969	0.0238438	2.03306	21	0.0001	0.00367718	1.50533	21	0.00189981	0.0169384	0.894481	21	0.377562	0.747339	0.617616	19	0.00229977
381	AIR75420.1	700	13482.2	ITQIVEELK;KQIEDAGGK	1;0	1	5	208580;208588;208590;208591;208592;250317;250318;250322	AIR75561.1	ribosomal protein L12 (chloroplast) [Cyclotella sp. L04_2]	1.85122	5	0.00619938	0.0463539	2.27124	5	0.0001	0.00353298	2.20571	5	0.00239976	0.0240109	3.00554	5	0.0001	0.00261133	1.25489	3	0.0741926	0.291183	2.0614	5	0.0001	0.0016362	0.67135	4	0.00029997	0.00772209	1.11863	3	0.428657	0.724213	0.249524	4	0.0001	0.0035271	0.458881	4	0.00019998
382	AIR75515.1	688	104826	VIMLAQEEAR;FFRPEFLNR;NNPVLVGEAGVGK;KNNPVLVGEAGVGK	1;0;0;0	1	5	144650;144651;144669;144671;144673;165577;251124;251126;251130;320414	AIR75656.1	Clp protease ATP binding subunit (chloroplast) [Cyclotella sp. L04_2]	0.630313	5	0.00449955	0.0377125	0.824127	5	0.125887	0.457357	0.596584	5	0.00129987	0.0146317	0.711375	4	0.0185981	0.122761	1.15452	5	0.0481952	0.219868	1.4128	5	0.00679932	0.0414874	0.860099	5	0.0291971	0.194144	1.04746	5	0.576542	0.822702	0.546426	5	0.00029997	0.00719528	0.724892	5	0.0418958
383	AIR75573.1	59	34260.9	GQVYPTGEK;YLTYPFYAGGNR;AIEIEAPQGVLPNSVFEIEIK;GVFISPYSTEFDNILVVGPIAGK;QQISADGKPADLNVGGILILPK	1;0;0;0;0	1	5	183719;183720;183722;183725;256941;219464;219480;219481;219482;219492;358940;358942;362121;364497;364499;364500	-	cytochrome f (chloroplast) [Cyclotella sp. WC03_2]	0.567841	4	0.00059994	0.00858009	0.67709	5	0.00209979	0.0329028	0.45868	4	0.0009999	0.011926	0.553104	5	0.00019998	0.00462005	0.994028	3	0.960304	0.988377	0.652698	3	0.0333967	0.138831	0.774801	5	0.0467953	0.264342	0.488181	5	0.00049995	0.00552399	0.650496	5	0.00039996	0.00827044	0.843625	5	0.174283
384	AIR75882.1	453	4001.29	LAIQQIQR	1	1	5	87926;87927;87938;87942;87945	sp|A0T0V3.1|PSBY_THAPS;YP_009093273.1;AIR75946.1;AIR75607.1;ABK20852.1;AIR75671.1;YP_009093209.1;ABK20788.1;YP_874565.1;YP_874629.1;AIR75466.1;AIR75530.1	photosystem II protein Y (chloroplast) [Roundia cardiophora]	0.385501	4	0.00019998	0.00367718	1.10987	4	0.176882	0.544223	0.295858	5	0.010199	0.0685387	0.798227	4	0.0581942	0.264813	1.54744	5	0.0357964	0.175763	0.666998	5	0.00319968	0.0244043	1.05814	5	0.636336	0.87856	0.463476	5	0.0253975	0.119117	0.643322	4	0.00179982	0.0252959	1.12681	3	0.412259
385	AIR75900.1	774	65884.2	IAGIEVLR;AVITVPAYFNDSQR;TTPSIVAYTK;EELLVGQIAK;TTINLPFITADK;KEELLVGQIAK;IINEPTAASLAYGLDK	0;0;0;1;0;1;0	2	5	61960;61966;83235;255588;255590;255594;255595;255596;255597;255598;255599;307912;210512;215161;267128;267135;267136;267137;301401;301402;301403;301404;319294;319295;319297	YP_009093227.1	heat shock protein 70 (chloroplast) [Roundia cardiophora]	1.60183	5	0.0659934	0.254647	1.43268	5	0.0474953	0.264452	1.21441	4	0.148285	0.427191	1.21791	5	0.0605939	0.271618	0.829129	5	0.0182982	0.106023	1.02046	4	0.857614	0.950558	0.913031	4	0.176582	0.533001	1.26073	5	0.0809919	0.272648	1.20847	3	0.182682	0.522773	1.04421	5	0.777222
386	BAA75795.1	132	16039.7	QVAYAMNK;SYSVQANPEGSR;GWAMNVEWTDDPHPR;NNYWELWGLPLFDIK	1;0;0;0	1	5	166506;171442;171443;171444;171448;187248;187250;187251;187252;187253;187254;187256;187257;187258;187259;187260;187261;187263;187264;187265;187266;187267;187275;259222;259225;259227;259228;259230;259231;259235;259241;259242;259243;259245;259246;259247;259248;259249;259250;259252;259255;259257;259258;259259;259262;259263;259270;259273;259274;259275;259295;297239;340040;340044	sp|O98948.1|RBS_THANO	ribulose-1,5-bisphosphate carboxylase/oxygenase small subunit (chloroplast) [Thalassiosira nordenskioeldii]	0.79653	4	0.0510949	0.216894	0.918413	5	0.163484	0.529567	0.696507	4	0.0260974	0.133907	0.86752	5	0.163284	0.482356	1.11919	3	0.314669	0.666525	0.755006	5	0.161884	0.406403	1.06843	5	0.477152	0.811925	0.726785	5	0.0486951	0.191485	1.161	5	0.30377	0.677177	1.21952	5	0.121388
387	EED86453.1	519	45447.8	TELHGLAK;LSLEATMINQNFTQQILR;LPTGALFFDK	1;1;1	3	5	148981;148983;194822;334534;217476	XP_002297246.1	predicted protein, partial [Thalassiosira pseudonana CCMP1335]	0.6027	5	0.0120988	0.0764983	0.697803	5	0.0257974	0.172814	0.526743	5	0.0143986	0.0903547	0.712045	4	0.0226977	0.13912	0.772345	5	0.0331967	0.166168	0.500184	5	0.00079992	0.00837126	1.08902	5	0.611939	0.873783	0.749714	5	0.116088	0.347024	1.08153	4	0.420958	0.775131	0.699873	5	0.0133987
388	EED87074.1	1462	98805.6	YGGVLEAVR;FIELGFNR;VQTYLLEK	1;1;1	3	5	86172;95317;95318;95319;188284	XP_002296378.1	predicted protein, partial [Thalassiosira pseudonana CCMP1335]	0.688182	5	0.0163984	0.0972034	1.09369	5	0.535146	0.81508	0.433852	4	0.00049995	0.00714611	0.741057	4	0.0147985	0.106536	0.542522	5	0.0145985	0.0904006	0.516683	5	0.00539946	0.0350867	0.821117	5	0.0305969	0.200493	0.741667	4	0.0213979	0.107347	1.89506	4	0.00029997	0.00719528	1.29847	4	0.0640936
389	EED87532.1	381	55075.1	ILGEEVFYR;VEGGGIWICGNYR	1;1	2	5	133878;133879;221430;233577;233578	XP_002295228.1	protoporphyrinogen IX oxidase usually abbreviated, partial [Thalassiosira pseudonana CCMP1335]	0.844493	4	0.119988	0.369604	0.933443	5	0.240576	0.616452	0.774217	3	0.153985	0.438399	0.778593	5	0.0506949	0.240875	0.880402	5	0.120688	0.37986	0.763947	5	0.126987	0.351117	0.805189	5	0.00379962	0.0465777	0.692242	5	0.00979902	0.0576733	1.10012	5	0.531847	0.843246	1.21346	5	0.256674
390	EED88332.1	696	145289	GLVDSAAMAR;FGEPVIHGFTR;GMEGSSLGVWVAHGEGR;GIVFVGGFSYADVLDSGK	0;0;1;1	2	5	98267;98286;176304;176305;283906;283909;283910;286494;334463	XP_002294498.1	phosphoribosylformylglycinamidine synthase [Thalassiosira pseudonana CCMP1335]	1.19375	5	0.0491951	0.21208	1.0771	5	0.630937	0.863942	1.45642	5	0.0555944	0.226017	1.20161	4	0.0814919	0.317167	1.01847	5	0.765523	0.921723	1.0064	5	0.962804	0.984896	1.14454	4	0.0686931	0.331863	1.22426	5	0.261174	0.555767	0.888806	5	0.274773	0.640771	0.735536	5	0.040496
391	EED88807.1	463	28192.1	AQIGVVAGGGR;GSGCFAVVISHDEDKGTTR	1;1	2	5	92101;92104;92112;92113;348120	XP_002293798.1;EJK66415.1	RL8, ribosomal protein 8, partial [Thalassiosira pseudonana CCMP1335]	0.592827	5	0.10179	0.330496	0.860583	4	0.0750925	0.34303	0.542784	5	0.19918	0.504634	0.700516	5	0.252875	0.612426	0.82693	5	0.344766	0.697803	0.432556	5	0.00889911	0.0502144	0.9229	5	0.661834	0.887638	0.473755	5	0.0242976	0.115767	1.14595	5	0.422858	0.775455	0.992858	4	0.945805
392	EED88845.1	393	50303.8	VMFEATGR;FEIPYFTVSGIQVR;TISFIPPDGEFDLMTYR;SVANNVEISIPVPPDVDSPSFK	1;1;1;1	4	5	71780;270531;270532;321627;359353	XP_002293836.1	mu subunit of tetrameric clathrin adaptor complex AP1 [Thalassiosira pseudonana CCMP1335]	1.05946	5	0.722628	0.901779	1.29729	4	0.010399	0.0970929	0.785213	5	0.0591941	0.235217	0.959403	4	0.667533	0.892374	0.950574	5	0.575342	0.847725	0.933711	5	0.49645	0.749673	0.970609	5	0.669033	0.892355	0.954882	5	0.591341	0.829858	1.5021	3	0.0154985	0.11474	1.45432	3	0.0407959
393	EED89095.1	796	62377.4	QCFDLLGIR;LVDLLDEAVSR	1;1	2	5	132675;166763;166790;166810;166811	XP_002293359.1	predicted protein [Thalassiosira pseudonana CCMP1335]	0.440699	5	0.0119988	0.0764023	0.857841	5	0.193281	0.565952	0.399064	5	0.010199	0.0685387	0.862809	4	0.142986	0.44764	0.552458	4	0.00019998	0.00371509	0.527537	4	0.00079992	0.00837126	0.71938	5	0.00259974	0.0360364	0.688491	5	0.0029997	0.0247819	0.818918	5	0.259374	0.618196	0.687531	5	0.0206979
394	EED89112.1	543	18765.7	GAVYALGDK;CPPVNQPLSFGK	1;1	2	5	156825;156826;268997;269008;269009	XP_002293376.1;EJK64528.1	predicted protein [Thalassiosira pseudonana CCMP1335]	0.909263	5	0.345665	0.66477	1.01993	5	0.728527	0.902269	1.15241	5	0.29997	0.622403	1.29471	5	0.00809919	0.0666427	1.62183	5	0.0158984	0.0958158	1.50674	5	0.00959904	0.053328	0.874363	5	0.171683	0.53237	0.802778	5	0.0218978	0.109246	0.715459	5	0.00789921	0.0700033	1.26132	4	0.0691931
395	EED89280.1	1249	22743.2	SWYESHYGVK;LDSGNFSWGTEVCTR	1;1	2	5	251354;251359;283887;283888;283889	XP_002293544.1	RS8, ribosomal protein 8 [Thalassiosira pseudonana CCMP1335]	0.693849	5	0.0453955	0.201982	0.86852	5	0.184582	0.555285	0.598323	4	0.00529947	0.0426087	0.655235	5	0.00539946	0.049642	0.874488	5	0.178382	0.476843	0.479617	5	0.00169983	0.0152224	0.872943	4	0.0670933	0.326367	0.518786	5	0.00319968	0.0261937	0.98541	5	0.945005	0.990535	0.920248	5	0.690731
396	EED89383.1	693	44376.3	GNLYVLFR;ILEVLVEK;KGADLLITK;IVPNEGMPSHGNPFVK;TLSLNEALCGFEWIVK	1;0;0;1;1	3	5	91303;91304;172180;172182;172183;252992;324383;324385;338135	XP_002293647.1	DnaJ protein [Thalassiosira pseudonana CCMP1335]	0.579302	4	0.00089991	0.0113401	0.817751	5	0.0089991	0.0876561	0.546971	3	0.0127987	0.0832148	0.782906	4	0.0325967	0.177998	0.872897	5	0.0565943	0.242817	0.725578	4	0.0240976	0.110371	0.959697	5	0.668833	0.892355	0.858635	4	0.162184	0.418222	0.855182	5	0.0679932	0.306566	0.780988	5	0.0264973
397	EED90024.1	926	48679.9	GWAFGLGLER;LAMILFEIPDIR;MELIDEFTNPK;WSEDYFPFTTPSYELEIK	0;1;1;1	3	5	127715;225605;267558;267559;267560;357413	XP_002292828.1	phenylalanine-trna synthetase-like protein [Thalassiosira pseudonana CCMP1335]	1.16423	5	0.121988	0.374484	1.13852	3	0.214179	0.58655	1.35673	5	0.177182	0.469964	1.52245	4	0.0149985	0.106827	1.65979	4	0.00029997	0.00514806	1.42662	5	0.0807919	0.25739	1.129	3	0.188281	0.549891	1.20098	5	0.144586	0.395742	0.834937	5	0.566643	0.856624	0.990176	5	0.969303
398	EED90355.1	441	90447.3	TAIAEGIAQR;IIQLEMEK;IRDEALLAAAK;NNPVLIGDPGVGK;RPYSVLLFDEMEK;AHPDVFNVMLQMLDDGR;LLGAPPGYVGYDEGGQLTDAVR	0;0;0;0;0;1;1	2	5	105237;105246;105247;105251;105260;105261;190897;190907;232236;232237;232238;232239;256259;256260;313499;313501;313502;316599;342570;342574;342575;342579	XP_002292380.1	hypothetical protein THAPSDRAFT_23902 [Thalassiosira pseudonana CCMP1335]	1.35065	5	0.019898	0.112051	1.2533	5	0.115588	0.44223	1.27096	4	0.0924908	0.313112	1.04486	4	0.649135	0.889537	0.894479	5	0.217478	0.533192	0.980259	5	0.888211	0.964499	0.879206	4	0.079792	0.35636	1.06819	4	0.538346	0.798289	1.76407	5	0.00329967	0.038052	1.48366	4	0.0107989
399	EED90514.1	515	28615.6	VDQVTFR;VLGPLSEVIAR;KADATAVK;VLGPGDYFGEQAIVK	0;0;1;1	2	5	3955;142838;142840;142841;142842;217263;309365;309368;309369;309371	EED86117.1;XP_002292539.1;XP_002297595.1	hypothetical protein THAPSDRAFT_36223, partial [Thalassiosira pseudonana CCMP1335]	0.993388	5	0.954505	0.985119	0.974184	5	0.849915	0.945399	1.19411	5	0.0942906	0.317416	1.15351	5	0.0762924	0.308249	0.927374	4	0.351565	0.700022	0.717055	4	0.0212979	0.101418	0.915495	5	0.207479	0.57829	0.883771	4	0.248275	0.539812	0.855846	5	0.362164	0.732621	0.818443	5	0.376662
400	EED91167.1	1515	59626.6	DVNFDMIR;WVGGVEIEHIAIATGGR;SLHDAMCVVR;HADTVAGVDQYAIR	1;1;1;1	4	5	99127;118535;153340;241681;241701	XP_002291060.1	t-complex chaperonin protein, epsilon subunit [Thalassiosira pseudonana CCMP1335]	0.909894	5	0.415058	0.722465	1.09405	5	0.447855	0.753747	0.943494	5	0.560844	0.828259	1.15509	5	0.0733927	0.300576	1.04307	5	0.521348	0.826624	0.924911	4	0.483252	0.74281	1.04684	5	0.565243	0.850375	1.02968	5	0.80022	0.927474	0.837192	5	0.187981	0.527915	0.823805	5	0.230577
401	EED91592.1	1756	63053.2	NAPCIVFLDEIDAVGR;TPGFSGAELENLMNEAALSAAR;RTPGFSGAELENLMNEAALSAAR	1;1;1	3	5	293566;342646;342656;342657;351251	XP_002291485.1	chloroplast ftsH, partial [Thalassiosira pseudonana CCMP1335]	0.788433	4	0.0441956	0.198111	1.15133	5	0.330567	0.685302	0.62012	5	0.00289971	0.0273423	0.959271	4	0.747925	0.913606	0.795908	5	0.0840916	0.310089	0.763187	4	0.0462954	0.17655	0.831067	4	0.0234976	0.168696	0.7952	4	0.0714929	0.251482	0.897348	4	0.277272	0.643629	0.938371	4	0.565343
402	EED91898.1	720	34898.2	TGEIRPVK;GDIFFNYGCLPR;KGDIFFNYGCLPR;IPDGKPPNVFGLDEK	1;1;1;1	4	5	158737;228258;308568;308576;341648	XP_002290146.1	predicted protein [Thalassiosira pseudonana CCMP1335]	1.03609	5	0.820118	0.94922	0.817135	4	0.10469	0.417368	1.16054	5	0.505049	0.786477	0.961603	4	0.684032	0.894917	1.24143	3	0.0866913	0.31623	0.90798	3	0.522448	0.76613	0.95064	5	0.507649	0.82179	0.693582	3	0.0343966	0.148201	0.701771	5	0.0641936	0.299648	0.890897	5	0.409259
403	EED92233.1	1589	21508.3	VLCQAYPR;FALPNVFWTR	1;1	2	5	98315;173449;173450;173452;173453	XP_002290481.1	thylakoid lumen 15.0-kDa protein, partial [Thalassiosira pseudonana CCMP1335]	1.70208	5	0.0637936	0.247605	1.39085	5	0.110689	0.429337	1.46285	4	0.0234976	0.124836	1.32818	5	0.0372963	0.197091	1.71424	5	0.00529947	0.0428235	3.27761	5	0.0276972	0.122494	1.39522	5	0.00029997	0.00772209	2.09007	4	0.00369963	0.0283533	1.12796	5	0.143086	0.465481	1.26428	5	0.182082
404	EED92389.1	517	44671.6	ANVLDVSQLWR;ELTGDVYFGTPK	0;1	1	5	188974;188975;188977;265605;265607;265613;265619;265624	XP_002290637.1	predicted protein [Thalassiosira pseudonana CCMP1335]	1.37544	5	0.00529947	0.0420689	0.845825	3	0.127687	0.462033	1.34428	4	0.0471953	0.200469	0.877976	5	0.120788	0.403328	1.31393	5	0.0155984	0.0949608	1.13625	5	0.170783	0.420204	1.19586	4	0.0277972	0.187605	0.972754	5	0.740426	0.907515	0.923684	3	0.539746	0.843246	0.980835	4	0.856614
405	EED92889.1	72	74611.7	ELVELPLR;FPELWTTAGVPTPK;GVLLHGPPGCGK;GVLFYGPPGCGK;LDQLIYIPLPDLESR;GPELLNAYFGGSEANVR;AIANECGANFISVK;VINQILSEIDGIGSGK;TLFIIGATNRPDILDPGIMRPGR	1;0;0;0;0;0;0;0;0	1	5	87628;87629;87632;87633;87639;135577;303244;237168;237169;237170;250627;250631;250632;250637;292957;294383;294384;294385;295182;295191;315426;356331;356889	XP_002289352.1	cell division cycle protein 48 [Thalassiosira pseudonana CCMP1335]	0.827159	3	0.189281	0.474387	0.977857	5	0.694931	0.891926	0.622234	4	0.00839916	0.0595547	0.816035	3	0.140886	0.442607	0.850203	4	0.0727927	0.28972	0.561212	5	0.00049995	0.00573191	0.839736	5	0.0109989	0.101641	0.508172	3	0.0019998	0.0177421	1.22206	5	0.0306969	0.181657	1.23292	4	0.0876912
406	EED93255.1	182	50421.7	CDIYLAAVGR;NLGSDVTLIIR;DIAATLVADLVR;IGLDKDIAATLVADLVR	1;1;1;1	4	5	137684;157812;157813;175511;330235	XP_002289718.1	probable SOLUBLE pyridine nucleotide transhydrogenase [Thalassiosira pseudonana CCMP1335]	1.77746	5	0.00589941	0.044667	1.36464	5	0.00949905	0.0905677	1.60555	5	0.0234976	0.124836	1.10947	4	0.284472	0.652044	1.19269	5	0.0785921	0.300049	1.30374	5	0.263774	0.538314	0.996354	4	0.955005	0.987434	1.34983	4	0.0212979	0.107144	1.51748	5	0.00039996	0.00827044	1.67312	5	0.00059994
407	EED93736.1	164	28108.5	APPAIYEGAVAAGAAK	1	1	5	289107;289110;289113;289116;289117	XP_002288300.1	formate/nitrite transporter family member [Thalassiosira pseudonana CCMP1335]	0.841258	5	0.0533947	0.223242	0.611139	5	0.0001	0.00353298	0.599837	4	0.00529947	0.0426087	0.440629	3	0.00039996	0.00750758	0.734783	4	0.00629937	0.0487187	0.940748	5	0.483652	0.74281	0.765023	5	0.0387961	0.232261	0.885359	5	0.20438	0.480999	1.53202	3	0.0124987	0.0960908	1.56713	5	0.00749925
408	EED93881.1	744	41990.2	VTVAMLER;HMEGQTVTIINR;VHGIIVYYPIFGQVESFSGESQDDYLR	1;1;1	3	5	78012;78036;213912;213919;367262	XP_002288445.1	predicted protein [Thalassiosira pseudonana CCMP1335]	0.907775	4	0.340066	0.658216	1.16096	4	0.29987	0.671869	0.724346	5	0.0668933	0.252039	0.785546	4	0.0543946	0.252626	0.941879	5	0.764724	0.921723	0.741632	5	0.0686931	0.23242	1.09558	4	0.175382	0.53237	0.814163	5	0.0555944	0.210791	0.987157	5	0.959404	0.990535	0.901191	5	0.675532
409	EED94751.1	1177	21884.9	LVLLGDTAVGK;GAAAAIVVYDITNPDSFAGAK	1;1	2	5	211840;348835;348842;348843;348844	XP_002287308.1	canine-like rab-type small G protein [Thalassiosira pseudonana CCMP1335]	1.19084	5	0.268173	0.580827	1.08986	5	0.155184	0.518817	1.36392	5	0.0886911	0.303674	1.25595	5	0.0214978	0.134045	1.06218	5	0.338466	0.69531	1.22302	5	0.0511949	0.19233	1.23883	5	0.0151985	0.123926	1.46219	5	0.0079992	0.0486708	1.0024	3	0.984902	0.994138	0.836927	5	0.0636936
410	EED95892.1	60	61508.6	SVALGDYLNR;GLVAFVPDGAILPR;AVQIFDQTLPQLVQK	1;1;1	3	5	128318;220367;220388;220389;324970	XP_002286251.1	hypothetical protein THAPSDRAFT_260965, partial [Thalassiosira pseudonana CCMP1335]	0.912428	5	0.655034	0.8711	0.870198	5	0.270673	0.646887	0.857981	5	0.433157	0.735958	0.831986	5	0.0612939	0.271822	1.0274	4	0.751825	0.921723	0.769247	3	0.129787	0.357759	0.900684	5	0.311369	0.69745	0.74121	3	0.0719928	0.252255	1.07125	5	0.537746	0.843246	1.1207	5	0.305969
411	EED96001.1	929	10169.5	AIGSPIWILMR;ILPLELIDK	1;1	2	5	180737;180739;203800;203801;203802	XP_002286360.1;EJK48624.1;EJK62729.1	predicted protein [Thalassiosira pseudonana CCMP1335]	0.959905	4	0.674833	0.879559	0.891705	5	0.0758924	0.344933	0.865391	5	0.158784	0.446828	0.763222	5	0.00659934	0.0582942	1.00995	5	0.922008	0.975607	0.756055	5	0.0909909	0.278544	1.19258	5	0.208879	0.57829	0.826796	4	0.0964904	0.307574	1.17165	5	0.227777	0.576785	0.973576	3	0.848315
412	EED96067.1	752	51073.9	ITLSGPCTSQIR;IAENMPGYTPYR;LALNEDLVIGK;KFPGCTEQTMR	1;1;1;1	4	5	197263;217049;235622;270974;270978	XP_002286426.1	mu subunit of AP4-like protein [Thalassiosira pseudonana CCMP1335]	1.02717	5	0.852415	0.959809	0.975049	4	0.729327	0.902269	0.977926	5	0.925107	0.963631	1.01539	5	0.922308	0.97334	0.795978	4	0.0559944	0.241971	1.16213	5	0.328967	0.61127	1.08991	3	0.323368	0.70803	1.45017	5	0.049895	0.194894	0.963797	5	0.840716	0.961765	0.775141	5	0.175882
413	EED96217.1	1085	46964.5	ACMSIPAAK;NVPAGLGAPVFDK;GFESGDGFGGTLLTGK	1;1;1	3	5	174125;257346;257348;303031;303035	XP_002286576.1	predicted protein [Thalassiosira pseudonana CCMP1335]	1.50152	5	0.00169983	0.018908	1.63675	5	0.00519948	0.0593004	1.5451	5	0.0155984	0.0945885	1.73886	5	0.020098	0.128428	1.00525	4	0.949005	0.984864	1.61776	4	0.00519948	0.0345353	0.86969	5	0.0255974	0.175386	1.46045	4	0.00769923	0.0474874	0.899503	5	0.405559	0.760623	1.00829	5	0.949905
414	EED96238.1	1315	140900	LHPVAAMTPER;GVYEMIITK;SAVVCAPTSSGK;GIAIYTNEVGFSCYR	1;1;1;1	4	5	164338;203772;203773;230574;287343	XP_002286597.1	predicted protein [Thalassiosira pseudonana CCMP1335]	0.996266	5	0.964004	0.98641	0.974925	5	0.765923	0.913546	1.15895	5	0.283272	0.603754	1.12737	5	0.446955	0.787157	0.989267	5	0.933907	0.982486	1.07273	5	0.69623	0.871788	1.0777	3	0.381362	0.755158	1.1453	5	0.351365	0.659929	0.708255	5	0.137086	0.455015	0.666347	5	0.0452955
415	EED96631.1	721	102900	DVLASLVEGR;RPGEETTLWIQR;DEQSAQSWVLTLR	1;1;1	3	5	113535;113536;234796;234804;245530	XP_002286990.1	predicted protein [Thalassiosira pseudonana CCMP1335]	0.811377	4	0.0671933	0.258171	0.971365	5	0.813319	0.929588	0.758704	5	0.0656934	0.248559	0.817169	5	0.0226977	0.13912	0.851229	3	0.171883	0.472428	0.976531	5	0.783822	0.921023	0.964977	5	0.50325	0.82179	1.09799	5	0.264974	0.559458	1.12194	4	0.250275	0.608439	1.04718	5	0.590741
416	EJK44963.1	1649	18162.2	MMMEQMK;EMMGGLVEVVK	1;1	2	5	167550;237156;237157;237161;237167	-	hypothetical protein THAOC_36458 [Thalassiosira oceanica]	1.494	5	0.0539946	0.224707	1.35191	4	0.0177982	0.1359	1.86569	5	0.00619938	0.0479188	1.5198	5	0.0223978	0.138697	1.04941	5	0.436756	0.765379	1.63674	5	0.00149985	0.0138448	1.17314	3	0.10179	0.411267	1.84025	5	0.0001	0.00166743	0.639825	4	0.00169983	0.0248617	0.562119	4	0.00069993
417	EJK46367.1	964	72332.7	GTLIELLQK;ICLLDIDIQGAQNVK	1;1	2	5	193628;193630;193631;321998;322002	-	hypothetical protein THAOC_34966 [Thalassiosira oceanica]	1.18337	5	0.163584	0.446502	1.12092	3	0.266673	0.641583	1.22762	5	0.250175	0.562953	1.33375	4	0.0175982	0.118558	1.03944	5	0.792321	0.926483	1.17386	5	0.39646	0.675785	1.05966	5	0.656634	0.886998	1.20239	5	0.314369	0.62149	1.05538	5	0.638136	0.902521	1.0721	4	0.523248
418	EJK46696.1	810	24876.2	VDIGQVLLSVR	1	1	5	157163;157173;157174;157175;157176	-	hypothetical protein THAOC_34623 [Thalassiosira oceanica]	0.245275	5	0.00149985	0.0169983	0.431055	4	0.0001	0.00353298	0.1	5	0.00679932	0.0508115	0.158989	5	0.0126987	0.0941692	0.512445	5	0.0414959	0.194728	0.134422	5	0.00219978	0.0181633	0.621943	5	0.0168983	0.133556	0.150097	5	0.00019998	0.00262893	1.90914	5	0.0146985	0.109721	1.72133	5	0.0168983
419	EJK47224.1	434	66268.2	ETPSMFVVR;LVANAFLAQR;MVSSMFNTVTGK;ADIVFISVNTPTK;FLNSSIGFGGSCFQK	0;0;1;1;0	2	5	115502;115510;120377;120378;120379;120386;126783;260709;267028;280572;280573;280575;316036	-	hypothetical protein THAOC_34076 [Thalassiosira oceanica]	1.51426	5	0.0536946	0.223976	1.28347	5	0.00429957	0.0541806	1.3931	5	0.0452955	0.19377	1.2048	5	0.0543946	0.252626	0.982442	5	0.842416	0.940541	1.32094	5	0.0747925	0.243448	0.941626	4	0.349865	0.729446	1.16128	5	0.378562	0.681649	1.11493	5	0.476452	0.807015	1.25514	5	0.151885
420	EJK48596.1	1102	31439.8	DGLHVLNIGK;FAHYTGSQSIAGR;FTPGTFTNQITK;EEDIQMMLSAGVHTGTR	1;1;0;0	2	5	206769;206770;206771;212882;212901;271064;271065;271073;306682;306686;306687	-	hypothetical protein THAOC_32592 [Thalassiosira oceanica]	0.915956	10	0.10029	0.327396	0.916535	11	0.167583	0.53419	1.02555	10	0.733927	0.905344	1.0699	10	0.318868	0.678395	0.964117	11	0.688831	0.90169	1.00312	9	0.948705	0.980292	1.07941	11	0.441256	0.781555	1.09681	11	0.482452	0.761679	0.753512	10	0.00589941	0.0558581	0.618434	11	0.00759924
421	EJK49243.1	276	45742.4	AVTDAMYR;RPSSNADPYLVTGK	1;0	1	5	75725;75727;75728;75759;167055;297010;297013;297014;297015;297016;297017	-	hypothetical protein THAOC_31900 [Thalassiosira oceanica]	0.925147	5	0.579442	0.837291	0.774239	4	0.0133987	0.113354	1.05479	5	0.648235	0.875029	0.951852	5	0.612139	0.876151	1.08059	3	0.478652	0.7929	1.55706	5	0.00219978	0.0181633	1.10343	4	0.151485	0.496319	1.57616	5	0.00019998	0.00262893	0.55507	3	0.00209979	0.0279816	0.571186	4	0.00079992
422	EJK49516.1	1501	43169	AASSASGLTGIALR;LYQMEYAFK;VDPAGHYLPFK;TAIVCLGSVLGSDFR;YEAADFEFK	0;0;1;1;0	2	5	181234;181239;237318;237319;248933;248935;258409;258411;258412;283796	-	hypothetical protein THAOC_31602 [Thalassiosira oceanica]	1.1027	5	0.688931	0.884857	1.10706	5	0.205479	0.579458	1.05628	5	0.864214	0.945649	1.08912	5	0.446055	0.787157	1.25734	4	0.0232977	0.126073	1.16507	3	0.325767	0.609098	1.17705	5	0.256674	0.637968	1.19672	5	0.162384	0.418222	0.717905	5	0.0358964	0.20436	0.689663	3	0.0445955
423	EJK50611.1	1170	5012.51	IATVIDIVDQNK	1	1	5	266140;266143;266144;266145;266146	EJK48626.1;EJK72485.1	hypothetical protein THAOC_30354, partial [Thalassiosira oceanica]	0.608629	5	0.0561944	0.230142	0.81638	5	0.142886	0.494204	0.670937	4	0.0175982	0.101585	0.849084	3	0.212579	0.566934	0.608005	5	0.0001	0.00219734	0.61099	5	0.00149985	0.0138448	0.517883	3	0.0001	0.00367718	0.532936	5	0.0001	0.00166743	0.950378	4	0.660234	0.912663	0.914969	5	0.652435
424	EJK55222.1	1397	29612.8	ECLPVAIILR;HDGSFSIVTVK	0;1	1	5	152391;152392;152393;152394;236652;236653;236655;236660;236661	-	hypothetical protein THAOC_25064 [Thalassiosira oceanica]	0.796565	5	0.020298	0.113593	0.854224	5	0.0247975	0.167989	0.909196	5	0.336766	0.66577	0.969844	5	0.715028	0.905182	1.07429	5	0.388161	0.726341	0.993004	5	0.933607	0.97307	1.08625	5	0.126187	0.45881	0.984213	4	0.875912	0.962488	0.58479	4	0.00049995	0.0097762	0.544494	5	0.0001
425	EJK58205.1	485	52326.5	TGATGFGAK;LTLADALVFADK;GLLFDTGGYNIK	1;1;0	2	5	130297;255683;255684;255685;255686;259970;259977;259978;259979;259980;259981;310498	-	hypothetical protein THAOC_21689 [Thalassiosira oceanica]	1.94651	5	0.00159984	0.0179063	1.1619	5	0.030197	0.196444	2.20325	5	0.00289971	0.0273423	1.32314	5	0.0049995	0.0476672	1.00943	4	0.907909	0.973261	1.46688	5	0.00389961	0.02819	1.19067	5	0.0377962	0.227789	1.83016	5	0.0001	0.00166743	0.633209	4	0.00129987	0.0201592	0.503751	4	0.00029997
426	EJK59479.1	458	34949.8	AVSNLVSTLMGPER	1	1	5	231960;231968;231969;231975;235730	-	hypothetical protein THAOC_20293 [Thalassiosira oceanica]	1.40969	4	0.0167983	0.0982811	0.977856	4	0.759424	0.913034	1.40966	4	0.0426957	0.185289	0.938533	4	0.509449	0.821869	0.971515	5	0.808819	0.930119	0.964608	5	0.824318	0.941479	1.02283	5	0.80212	0.956405	1.13244	5	0.390861	0.689462	1.29266	5	0.153285	0.479581	1.4719	4	0.0159984
427	EJK66117.1	1338	47525.2	GSIAYAK;LWIVEAER;NPDALELLR;SVGLMATLK;KNPDALELLR;ALCPEMLATDLADYLVR;ANQCPLGSGALAGNAFGVDR	0;1;0;0;0;0;1	2	5	100414;100943;100944;100951;108338;108343;165046;231798;315812;318620;318621	-	hypothetical protein THAOC_12984 [Thalassiosira oceanica]	0.937501	10	0.584642	0.838699	1.03713	11	0.728727	0.902269	1.00974	11	0.946805	0.973841	1.03118	11	0.787721	0.932025	1.04748	11	0.574443	0.847681	1.32624	10	0.0418958	0.166473	1.1554	11	0.0745925	0.346151	1.35892	11	0.0646935	0.231891	0.808865	11	0.0762924	0.328349	0.718945	11	0.0308969
428	EJK67032.1	494	49500.7	ENVALDIGGYR;LDVTTYSWQK;VLGGEGAHGMLILSPR;IWCGATVETADVEALMPWLK	0;0;1;0	1	5	159510;159511;159517;159522;159523;240632;240637;248266;260968;260969;264125;264134;264149;358751	-	hypothetical protein THAOC_11980 [Thalassiosira oceanica]	0.939398	4	0.525147	0.809745	1.04544	5	0.808619	0.926929	1.02329	5	0.815918	0.933225	1.05549	5	0.694231	0.90065	1.25695	5	0.0754925	0.293184	1.08803	5	0.485551	0.743191	1.21704	5	0.0486951	0.271668	1.0282	3	0.847515	0.955178	0.862867	5	0.425557	0.778026	0.863421	5	0.415758
429	EJK68699.1	313	45430.7	ALESDMAPVLVIATNR	1	1	5	278927;278928;278930;278934;281750	EED93774.1;XP_002288338.1	hypothetical protein THAOC_10098 [Thalassiosira oceanica]	0.865185	4	0.172883	0.458215	0.883245	4	0.156484	0.520267	0.93311	5	0.490951	0.778771	0.992864	5	0.958104	0.987138	0.897637	5	0.19678	0.508278	0.868977	5	0.136686	0.366124	0.876884	5	0.0324967	0.207367	0.848595	4	0.139886	0.390596	1.15663	4	0.162384	0.49346	1.2013	4	0.123988
430	EJK69203.1	1598	66506.3	AVVLFAK;EMGYLFGQYK;FCQSYMTELAK	1;1;0	2	5	111563;247069;247070;247071;250596;275358	-	hypothetical protein THAOC_09567, partial [Thalassiosira oceanica]	1.46726	4	0.00659934	0.0489383	1.47701	5	0.00069993	0.014666	1.02483	5	0.839416	0.939443	1.17089	5	0.0611939	0.271822	1.05903	5	0.534747	0.830822	1.1939	4	0.145585	0.383474	1.06865	5	0.561944	0.848804	1.29894	5	0.010299	0.0598337	1.20581	5	0.0380962	0.212842	1.18414	5	0.167683
431	EJK70523.1	465	30435.3	DTDEIINYGFPCFSYSTTAR	1	1	5	348912;348915;348916;360664;360666	EED95492.1;XP_002288049.1	hypothetical protein THAOC_08109 [Thalassiosira oceanica]	0.601863	5	0.0952905	0.3174	0.940855	5	0.379762	0.705205	0.462488	5	0.0182982	0.103959	0.734853	5	0.0205979	0.130695	1.46984	5	0.0329967	0.166129	1.28579	5	0.0707929	0.23554	0.974411	5	0.705229	0.903857	0.762989	4	0.0310969	0.137945	0.763677	5	0.0614939	0.290361	1.24668	4	0.0786921
432	EJK73546.1	1402	11593	SHLPSFIDAQDELK;VAIFAVPGAFTPGCSK	1;1	2	5	46407;312933;312934;312935;312936	EJK50639.1	hypothetical protein THAOC_04822 [Thalassiosira oceanica]	1.14565	4	0.19618	0.483607	1.05241	5	0.658434	0.882155	1.09543	4	0.476552	0.768167	1.2511	4	0.0445955	0.220168	1.53254	5	0.010199	0.0696158	1.59763	5	0.00169983	0.0152224	1.18171	5	0.20068	0.573099	1.26287	5	0.0407959	0.166985	0.60714	5	0.0167983	0.120399	0.741391	5	0.165083
433	EJK74268.1	1279	14065.5	VLDIASFEK	1	1	5	195557;195559;195567;195570;195574	-	hypothetical protein THAOC_04063 [Thalassiosira oceanica]	0.294451	4	0.0001	0.00219734	0.423195	5	0.00069993	0.014666	0.230309	5	0.00119988	0.0139418	0.342148	5	0.00459954	0.0452916	0.532996	5	0.00679932	0.0523606	0.23262	3	0.0001	0.0016362	0.58881	5	0.0109989	0.101641	0.278248	4	0.0001	0.00166743	0.950558	5	0.606039	0.890012	0.923468	5	0.542046
434	EJK74458.1	962	34930.3	YNANELLTK;ILPSLMNECAK	1;0	1	5	206721;206728;206729;206731;274019;255480;255488	-	hypothetical protein THAOC_03860 [Thalassiosira oceanica]	0.559484	5	0.00079992	0.0106775	0.564537	3	0.00069993	0.014666	0.441797	5	0.00049995	0.00714611	0.451939	5	0.00019998	0.00462005	0.579119	5	0.0001	0.00219734	0.523221	5	0.0001	0.0016362	0.660794	4	0.00029997	0.00772209	0.578592	5	0.00019998	0.00262893	1.01667	5	0.819218	0.954516	0.922392	5	0.342066
435	EJK74888.1	1561	36180.6	LVGVTTLDVCR;KLVGVTTLDVCR;AGAGSATLSMAYAGYIFTENVLK	1;1;1	3	5	167690;272159;272161;272167;360528	-	hypothetical protein THAOC_03405 [Thalassiosira oceanica]	1.39921	3	0.0456954	0.202816	1.07826	5	0.30247	0.671869	1.08146	5	0.528247	0.804884	0.834499	5	0.19738	0.539726	1.16299	4	0.212779	0.52741	1.51447	3	0.0362964	0.148148	1.15992	5	0.0968903	0.398622	1.61839	5	0.00049995	0.00552399	0.978645	5	0.90181	0.979117	0.891484	5	0.518648
436	EJK75202.1	93	115204	GFSGGSR;LGGIPMGAISVETR;SVGIGAYLVR;VYIACNSGAR;MTMFSDPEAR;IAQDNYVK;DKLNMLGIR;GGILEPAGIVEIK;AYDEIFTLSYVTGR	0;0;0;0;1;1;0;0;0	2	5	23202;55625;214388;214389;218364;218368;106635;106636;129242;152430;152432;152433;174900;174905;205182;209248;259621;259624;259626;259627;266439;266440;266442	-	hypothetical protein THAOC_03085, partial [Thalassiosira oceanica]	0.974239	5	0.887711	0.973136	0.983163	5	0.862314	0.94923	1.07058	5	0.631137	0.862318	1.08032	5	0.30137	0.666342	1.70086	5	0.0189981	0.107656	1.40688	5	0.0315968	0.134455	1.20893	5	0.242276	0.619407	1.0583	4	0.593241	0.829858	0.865001	5	0.123488	0.430532	1.17822	5	0.143986
437	EJK76287.1	679	22771.4	SAESLAANVAR;GFTLEELK	1;0	1	5	122333;122334;122343;122345;122355;170278;170279;170280	-	hypothetical protein THAOC_01961 [Thalassiosira oceanica]	0.327249	8	0.00019998	0.00367718	0.553923	8	0.00209979	0.0329028	0.211609	8	0.00019998	0.00360164	0.359301	8	0.00179982	0.0222142	0.686017	8	0.00239976	0.0232493	0.342991	7	0.0001	0.0016362	0.717469	8	0.0206979	0.156057	0.400101	8	0.00049995	0.00552399	0.881424	8	0.239376	0.595626	0.794856	7	0.00389961
438	EJK77442.1	129	88204	QNLYIIR;EIIGHHQVEGVIR;YSFPPGGVVNEVAQDLIQR	1;0;1	2	5	74112;235025;235028;235031;330405;330406;330411;330412	-	hypothetical protein THAOC_00726 [Thalassiosira oceanica]	0.876642	8	0.0149985	0.0903923	0.938048	8	0.213379	0.58655	1.0252	8	0.685631	0.892178	1.09215	8	0.159084	0.477093	1.07667	8	0.0987901	0.339429	1.10735	8	0.215478	0.480844	1.06013	8	0.294071	0.680101	1.09763	8	0.188581	0.460834	0.958394	7	0.433257	0.781166	1.00788	6	0.914909
439	XP_002287300.1	624	70795.9	VGGGIYTK;DTSGPALNIVMK;TDALDAAGNTTAAIGK;EKTDALDAAGNTTAAIGK	1;1;1;1	4	5	125478;249271;252693;294452;348845	EED94743.1;EJK49356.1	vacuolar membrane proton pump, inorganic pyrophosphatase [Thalassiosira pseudonana CCMP1335]	1.08956	5	0.271273	0.584624	0.923546	5	0.673233	0.884231	0.615811	5	0.116288	0.368724	0.536195	5	0.146585	0.453222	0.803492	4	0.0583942	0.247433	0.775417	5	0.059694	0.214042	0.889331	3	0.20048	0.573099	1.00841	5	0.943506	0.98248	1.95353	5	0.00359964	0.0402221	1.6228	3	0.0133987
440	XP_002287546.1	53	31783	YNSGLIGGMR;EVGFVNLCTVGLLPR	1;1	2	5	116091;120944;273910;273961;273962	EED94989.1	phosphate transport protein [Thalassiosira pseudonana CCMP1335]	0.811868	5	0.143086	0.411886	1.10246	5	0.120788	0.449717	0.680151	4	0.0238976	0.126216	0.822076	5	0.339266	0.696307	0.715903	5	0.0483952	0.220122	0.664266	4	0.0183982	0.0922345	0.984313	3	0.853915	0.961121	0.967528	4	0.758024	0.90878	1.3574	5	0.0909909	0.356629	1.03186	3	0.824418
441	XP_002288120.1	210	53062.4	LPFGIAQIGK;FIPHVIEPSLGVDR;IPMDEVVPYLSK	0;1;1	2	5	201257;255324;255325;277976;277977;280878	EED95563.1	glycyl tRNA synthetase [Thalassiosira pseudonana CCMP1335]	1.31127	5	0.347465	0.665773	0.870185	5	0.518948	0.801323	1.50033	5	0.125887	0.385584	0.977849	5	0.850415	0.950588	1.15837	5	0.208679	0.523279	1.27293	4	0.0671933	0.228204	0.943933	5	0.485251	0.814933	0.950107	5	0.693931	0.891419	0.998045	5	0.982402	0.994138	1.22104	5	0.152185
442	XP_002288361.1	1182	45693.6	LIDGLVPAYYLR;IYFPDEGSAALAR	1;1	2	5	212500;212504;216508;216509;216526	EED93797.1	predicted protein [Thalassiosira pseudonana CCMP1335]	1.10359	5	0.813219	0.945781	0.178879	5	0.110789	0.429337	1.39606	5	0.633337	0.863467	0.273208	5	0.131287	0.423106	1.01292	4	0.962704	0.988649	0.632493	5	0.0729927	0.240524	1.24293	4	0.0114988	0.103605	0.977611	5	0.873513	0.961647	1.12729	5	0.484152	0.814008	0.878571	3	0.377162
443	XP_002288652.1	371	38206	YTVLSALEGR;SHPDLCLK	1;1	2	5	128670;128677;128678;180927;180938	EED94088.1	predicted protein [Thalassiosira pseudonana CCMP1335]	0.991095	5	0.941606	0.984222	1.04684	5	0.740926	0.908883	0.923629	5	0.445755	0.744718	0.955559	3	0.728027	0.907011	1.2479	5	0.0919908	0.328252	0.987905	5	0.881712	0.962191	1.4587	5	0.049895	0.274668	1.19879	3	0.219678	0.504	1.01759	5	0.914309	0.983599	0.830115	5	0.442056
444	XP_002289802.1	1412	50017.1	VATAAIEVLR;GLLNAIVIDQPK;YNVLLIADEVQTGLGR;ILPMNTGVEGGETAIK	1;1;1;1	4	5	109084;256515;289070;289072;313888	EED93339.1	hypothetical protein THAPSDRAFT_27892 [Thalassiosira pseudonana CCMP1335]	1.0754	5	0.524448	0.809745	0.88569	5	0.318468	0.680475	1.29644	5	0.136286	0.403704	1.06172	5	0.70203	0.903334	1.4417	5	0.0291971	0.150323	1.64452	4	0.00439956	0.0305761	1.08701	5	0.124188	0.458177	1.12004	5	0.359064	0.662576	0.769862	4	0.029797	0.178683	1.10478	5	0.306669
445	XP_002289813.1	932	50255	QGVDVIVGTPGR;TIVFTETK;LPSMIVLCPTR;AGAFNVLVATDVAAR	1;1;1;1	4	5	156724;170977;170986;184911;232175	EED93350.1	RNA helicase, partial [Thalassiosira pseudonana CCMP1335]	0.891801	4	0.268973	0.58186	1.03049	5	0.620138	0.859509	0.752917	3	0.125087	0.384441	0.820203	5	0.0251975	0.150351	0.914725	4	0.273473	0.62527	0.666868	5	0.00319968	0.0244043	0.811356	5	0.0237976	0.168832	0.632904	5	0.00119988	0.0115561	1.01768	5	0.885511	0.978479	1.07148	5	0.515948
446	XP_002289814.1	1438	21099.9	KAGTDENPNPEAYR	1	1	5	337119;337121;337123;337127;337128	EED93351.1	RL18a, ribosomal protein 18a 60S large ribosomal subunit [Thalassiosira pseudonana CCMP1335]	0.427876	5	0.00669933	0.0492743	0.565987	5	0.00059994	0.0138602	0.59456	4	0.00669933	0.0504832	0.697452	4	0.00559944	0.0509606	0.697118	4	0.00259974	0.0246565	0.490935	4	0.00019998	0.00281222	0.798923	5	0.20348	0.575738	0.557055	5	0.0079992	0.0486708	0.68913	5	0.0410959	0.222302	0.678871	5	0.020498
447	XP_002289883.1	758	63799.3	YVVPTPIEESISMSR;GVELTHDNFVSNVYAVR	1;1	2	5	280351;283077;312123;312125;312131	EED93420.1	predicted protein, partial [Thalassiosira pseudonana CCMP1335]	1.31821	5	0.0735926	0.273048	1.15884	3	0.167983	0.53419	1.72416	5	0.0251975	0.131538	1.48861	5	0.00569943	0.0516099	1.27087	5	0.115088	0.373675	1.16687	5	0.107589	0.311219	1.01007	5	0.832317	0.960479	0.925148	5	0.485551	0.764404	1.11882	4	0.260174	0.618196	1.27136	4	0.0621938
448	XP_002290006.1	483	153081	QNYLDNSLR;GQGIASFGLASK;DYNDFNIDPTYFSQGPGNYR	0;1;0	1	5	132930;132936;223953;223954;223955;223961;223962;350240;350241;350242;350243;350244;361344;361345	EED93543.1	predicted protein [Thalassiosira pseudonana CCMP1335]	1.347	4	0.029597	0.14612	1.04385	5	0.624238	0.859509	1.653	5	0.00879912	0.0616435	1.15431	5	0.0744926	0.303015	1.16078	5	0.0419958	0.196053	1.33475	5	0.079792	0.255108	1.17246	5	0.10449	0.418423	1.35711	5	0.160384	0.418222	0.80318	5	0.0206979	0.140512	0.78512	5	0.0860914
449	XP_002290333.1	28	52733.9	YSILDAPGHK;VESGTIRPGMK;EHLNLVFIGHVDAGK	1;1;1	3	5	53921;215381;215382;233202;316094	EED92085.1	translation elongation factor-1-alpha [Thalassiosira pseudonana CCMP1335]	1.03648	5	0.834017	0.954187	0.92456	4	0.369363	0.700623	1.03235	5	0.783422	0.921018	0.969411	4	0.748325	0.913606	0.746694	4	0.00779922	0.0568996	1.18253	5	0.183182	0.437781	1.05458	5	0.29597	0.680101	1.56156	5	0.00019998	0.00262893	0.982113	5	0.924708	0.985949	0.747328	5	0.113789
450	XP_002290752.1	850	70955.2	YWDMVQR;ITVFYTAPTAIR;RDEDGFIWITGR;IGAVHSVIFAGFSADAIADR	0;0;1;1	2	5	95791;202440;229704;229715;229724;323263;323264	EED92504.1	acetyl-coenzyme a synthetase, partial [Thalassiosira pseudonana CCMP1335]	1.37857	5	0.00519948	0.0414578	1.1253	5	0.19658	0.5686	1.26127	5	0.0422958	0.184878	1.03977	5	0.60154	0.870807	1.19491	5	0.231477	0.556904	1.28304	5	0.0456954	0.175377	1.13929	5	0.0894911	0.38214	1.2204	4	0.0879912	0.287935	1.49335	4	0.00329967	0.038052	1.40439	5	0.0433957
451	XP_002291513.1	1744	62676.7	RVEITGPVDR;LVEDMLTK	1;1	2	5	22209;139122;139128;139130;174196	EED91620.1	probable malate synthase [Thalassiosira pseudonana CCMP1335]	1.11463	5	0.614239	0.855377	0.842552	3	0.121088	0.449717	1.49269	5	0.030197	0.146986	1.07994	3	0.555144	0.848579	1.06818	5	0.493551	0.802304	1.22729	5	0.140986	0.375118	1.04361	5	0.676332	0.892355	1.22985	5	0.172183	0.435535	0.779377	4	0.0352965	0.20287	0.77545	4	0.0928907
452	XP_002292065.1	1251	35477.6	VLDLQIQMR;TPAFCAGGDQTVR;MGSVDAGYGSVHLAR	1;1;1	3	5	135800;209063;209064;209065;299408	EED90916.1	probable naphthoate synthase [Thalassiosira pseudonana CCMP1335]	1.19164	5	0.112989	0.35441	1.1542	5	0.159284	0.523777	1.11833	5	0.262874	0.577444	1.15033	4	0.161084	0.478999	1.0095	5	0.939106	0.982896	1.06372	5	0.479452	0.740149	1.06514	5	0.492451	0.821013	1.13775	5	0.137186	0.385449	1.10948	4	0.294571	0.66536	1.17493	5	0.333367
453	XP_002293455.1	1028	68736.6	LAAFYER;VSCLGSPDR;VVMEVAK;LPGNVPLITGLR;ESDYGFIFK;TTLVANTSNMPVAAR;FSNSDVIVYVGCGER;EASIYTGITLAEYFR;LGEMPADSGYPAYLGAR;YMQVLEPYFNNMDPR;EDFLAQNAFTEHDFTCPLPK	0;0;0;0;1;0;0;0;0;0;1	2	5	61612;61629;93668;93670;93672;119962;119966;173194;173214;173215;173216;173220;216535;216544;216549;281416;248467;248468;248475;251826;251827;279188;279189;279195;284800;284803;325548;290118;290119;290122;290126;292681;292682;292684;292685;328791;328796;330270;330272;311676;313652;313654;315553;361280	EED89191.1	vacuolar proton pump alpha subunit [Thalassiosira pseudonana CCMP1335]	1.44952	5	0.0110989	0.0722029	1.11309	4	0.167383	0.53419	1.79001	3	0.0147985	0.0915881	1.31986	4	0.020098	0.128428	1.24787	4	0.0258974	0.136454	1.16374	5	0.134487	0.362928	1.1135	5	0.233277	0.609224	1.14035	4	0.222378	0.506965	1.02604	4	0.789421	0.949004	1.05996	5	0.494251
454	XP_002293997.1	1456	69699	AMTMEIR;NTVLATGGYGR;AAMGLSEAGFK;GSDWLGDQDAIHYMCR	1;1;1;1	4	5	57473;128646;210724;210725;312597	EED89006.1	succinate dehydrogenase flavoprotein subunit [Thalassiosira pseudonana CCMP1335]	1.16411	5	0.0777922	0.283143	1.0724	5	0.40376	0.720728	0.960438	5	0.686231	0.892178	0.897491	5	0.156984	0.472263	0.933426	4	0.391861	0.726845	1.14667	3	0.374863	0.654464	1.05416	4	0.409259	0.767531	1.09411	4	0.527847	0.791853	0.991311	3	0.948905	0.990535	0.813044	5	0.0391961
455	XP_002294706.1	49	73642	DFVGGPTPLHK;DKDIVINMSGR;FGGQFIPETLSEAFR;LTEMCGGATIWLK	1;1;1;1	4	5	231503;249751;249752;278694;292740	EED88066.1	tryptophane synthase [Thalassiosira pseudonana CCMP1335]	1.12862	5	0.389761	0.70716	1.27681	5	0.00359964	0.047004	1.20965	4	0.154085	0.438399	1.235	5	0.0193981	0.12665	0.917992	4	0.293271	0.642008	1.31573	5	0.0211979	0.101418	1.06943	4	0.30217	0.687513	1.53585	5	0.00249975	0.0213367	0.95039	3	0.688931	0.916029	0.854975	4	0.171083
456	XP_002294888.1	769	33717	VLVIGGGDGGVLR;KVLVIGGGDGGVLR	1;1	2	5	161279;161286;161287;161295;268260	EED87668.1	spermine synthase [Thalassiosira pseudonana CCMP1335]	1.38175	3	0.0525947	0.220828	1.15204	4	0.227977	0.602097	1.15173	5	0.277072	0.596899	0.775671	5	0.534447	0.837691	1.55363	4	0.0690931	0.278536	1.71214	3	0.0125987	0.0665036	1.17781	5	0.0228977	0.16571	1.2454	5	0.156884	0.412743	0.849497	5	0.312469	0.688886	1.35588	5	0.262974
457	XP_002295441.1	732	59296.7	LTQFTGSSR;GAGIGTPEAIK;TTGAPQNHWFGPAGDAR	0;1;1	2	5	95570;193359;193368;292537;292541;292542	ACI64158.1;EJK62218.1	aldehyde dehydrogenase [Thalassiosira pseudonana CCMP1335]	1.11208	5	0.506449	0.796288	1.04262	5	0.762624	0.913546	1.20297	5	0.263074	0.577444	1.17469	3	0.220578	0.579362	1.21424	5	0.0639936	0.263882	1.13947	5	0.430257	0.703417	1.10802	5	0.390761	0.755158	1.03678	5	0.873013	0.961647	1.00266	4	0.978502	0.994138	1.03916	3	0.785721
458	XP_002296153.1	215	33966.5	LADFGLAR;DLKPQNLLVSR;RPLFPGDSEIDELFK	0;1;1	2	5	60043;256969;256971;328363;328366;328367	ACI64870.1	cell division control protein, cdc2, cyclin-dependent kinase, cdk1, p34, partial [Thalassiosira pseudonana CCMP1335]	0.630015	5	0.0266973	0.1359	0.805865	5	0.0564944	0.290865	0.65851	5	0.0365963	0.169434	0.787147	4	0.0347965	0.187174	0.668959	5	0.00129987	0.0150152	0.810002	5	0.0441956	0.171448	0.973124	5	0.681732	0.892355	1.24822	4	0.060294	0.223896	0.715828	5	0.019898	0.137679	0.478312	3	0.00079992
459	XP_002296190.1	675	62850.4	MEIAELPR;SADGVVVPGGFGTR;SVGLSPTVIFCR;YTGLQDSYLSVIK	1;1;1;1	4	5	84667;193492;197992;197997;293977	ACI64907.1	CTP synthase [Thalassiosira pseudonana CCMP1335]	1.1085	5	0.574743	0.835905	1.04232	5	0.650835	0.876859	0.981816	5	0.919808	0.962565	0.942289	5	0.791021	0.932824	0.8191	5	0.0143986	0.0894697	0.845681	5	0.358164	0.639025	1.04573	5	0.583442	0.857555	1.09255	5	0.614939	0.841569	1.03683	3	0.776222	0.94737	0.755066	4	0.0489951
460	XP_002296348.1	883	62689.7	TSLLDAIR;QAGVPLLVAVNK;IMLQAEVLDLK	1;1;1	3	5	66359;66361;241214;255033;258073	ACI65065.1	bacterial protein translation initiation factor 2 [Thalassiosira pseudonana CCMP1335]	0.705243	5	0.0368963	0.173596	0.816874	5	0.20328	0.576469	0.645796	5	0.0965903	0.323946	0.753791	5	0.241976	0.603934	1.05566	5	0.385961	0.724857	0.742993	5	0.146685	0.383474	0.884739	5	0.0542946	0.288291	0.614688	5	0.010299	0.0598337	0.994277	4	0.954305	0.990535	1.19359	4	0.134387
461	XP_002296519.1	892	67026.9	TTLVDALIR;VPEEYSGSVIDLFNTR	1;1	2	5	97044;97046;299692;299693;299694	EED87215.1	predicted protein, partial [Thalassiosira pseudonana CCMP1335]	1.11541	5	0.314469	0.63305	1.37335	5	0.00469953	0.0568359	1.02653	4	0.834817	0.93867	1.10584	4	0.29847	0.664825	1.16247	4	0.0908909	0.326266	1.31588	5	0.0678932	0.230146	0.990459	5	0.884712	0.974481	0.953363	4	0.653935	0.866115	1.14161	5	0.184582	0.526269	1.44899	3	0.0422958
462	XP_002297525.1	354	36690.4	LALIEAAK;QIVLQALTK;LAFVEILNVENDFSK;GWISSEIISLCEQLAGQSAK	1;1;1;1	4	5	136154;193413;193414;325935;354639	ABK20782.1;EED86165.1;YP_874559.1	predicted protein [Thalassiosira pseudonana CCMP1335]	0.679233	5	0.00149985	0.0169983	0.999512	5	0.9951	0.9986	0.567193	5	0.00439956	0.0370262	0.852522	5	0.305069	0.668778	0.687263	5	0.00039996	0.00643507	0.534735	4	0.0009999	0.0100549	0.840299	5	0.0408959	0.240634	0.614561	5	0.00019998	0.00262893	1.34021	5	0.0437956	0.231578	1.13924	5	0.260074
463	YP_004072619.1	57	28973.2	YLLPDPIGTLK;LWLLPNTAGSQTAEDAIR	1;1	2	5	245987;316413;316414;316421;316422	ADB27572.1;YP_009093259.1;AIR75932.1;EED86143.1;XP_002297558.1;YP_874615.1;ABK20838.1;sp|A0T103.1|THIG_THAPS	thiazole biosynthesis protein ThiG (chloroplast) [Thalassiosira oceanica CCMP1005]	1.1903	5	0.224578	0.522179	1.07767	5	0.561844	0.829191	1.35912	5	0.0191981	0.107046	1.19061	5	0.105689	0.37016	1.06591	4	0.425157	0.761345	1.73768	4	0.00239976	0.0194575	0.875802	4	0.0724928	0.344675	1.56068	3	0.0164983	0.0876505	0.786604	5	0.0138986	0.104182	0.87237	5	0.329967
464	YP_009093242.1	42	14928.1	VTDNIADMLTR;HQIVEIPATK;ELGIGGEVLCYIW	1;0;1	2	5	172647;177867;177872;177885;223989;223990;223991;240033	AIR75915.1	ribosomal protein S8 (chloroplast) [Roundia cardiophora]	0.508862	5	0.00089991	0.0113401	0.976618	4	0.744226	0.909461	0.347582	5	0.00049995	0.00714611	0.73461	5	0.0515948	0.244026	0.884862	5	0.550545	0.8372	0.55592	5	0.0121988	0.0647723	0.53248	4	0.00139986	0.0244908	0.309869	4	0.0001	0.00166743	0.659748	5	0.157884	0.48418	0.982766	5	0.950005
465	AAZ74654.1	16	52295.4	AGNSTYAR;DTDVLALFR;VVYEGLK;ASAATGEVK;IPHSYLK;AVAALRLEDMR;FLNCMEGINR;TFQGPATGIIVER;YESGVIPYAK;TCGPLQTALDLWK;MSGVDHIHAGTVVGK;TCGPLQTALDLWKD;GGLDFLKDDENINSQPFMR;GGLDFLKDDENINSQPFMRWR	0;0;0;0;0;0;0;0;0;0;0;1;0;0	1	4	54669;54670;110836;110853;110854;110855;110856;110867;110868;110871;110873;110874;110880;110881;110882;110883;110884;110885;110886;110888;110889;110890;110891;110892;110893;110895;110896;110897;110898;129749;129778;129784;137794;137799;137802;137805;137809;137813;145418;171482;174270;174273;174274;174277;174280;174285;174290;179551;179552;179553;179556;179557;179561;211483;221651;221660;221661;22…	-	ribulose-1,5-bisphosphate carboxylase/oxygenase large subunit, partial (chloroplast) [Porosira pseudodenticulata]	2.24249	4	0.00239976	0.0248527	1.73446	4	0.0001	0.00353298	2.03749	4	0.00349965	0.0316727	1.69681	4	0.00059994	0.010199	1.09772	4	0.309569	0.66017	0.83938	3	0.268373	0.542777	1.25476	4	0.106689	0.423467	0.968951	3	0.827817	0.943466	2.09984	4	0.0001	0.0035271	1.98707	3	0.00159984
466	ACI64432.1	1244	80838.6	IPPYFALVIR;DTITSLGPFFIK;NINDDDSQVAGLEMK	1;1;1	3	4	153924;267982;267983;316016	XP_002295715.1	hypothetical protein THAPS_28865 [Thalassiosira pseudonana CCMP1335]	1.18812	4	0.415258	0.722465	1.12421	4	0.311069	0.679649	1.31001	4	0.117488	0.371518	1.06496	3	0.626037	0.885578	1.05739	4	0.626237	0.879193	0.853936	4	0.185481	0.440457	0.914355	4	0.577142	0.854535	0.735723	4	0.0985901	0.31151	1.25254	3	0.124888	0.430752	1.08662	4	0.748825
467	ACI64800.1	94	228702	GFSGGSR;LGGIPMGAISVETR;SVGIGAYLVR;YPFHVER;NSVEYLVK;DKLNMLGIR;NVQIYVGSEK;GGILEPAGIVEIK;AYDEIFTLSYVTGR;FIGPTGPVMSVLGDK;EAVLPQAGQVLFPDSSYK	0;0;0;0;0;0;0;0;0;0;1	1	4	23202;55625;214388;214389;218364;218368;106635;106636;173844;175230;175233;175238;205182;209248;224234;224240;259621;259624;259626;259627;266439;266440;266442;299145;299146;342939;342943;342945;342946	XP_002296083.1	acetyl-coa carboxylase [Thalassiosira pseudonana CCMP1335]	0.77227	3	0.0974903	0.320579	1.05425	4	0.535546	0.81508	0.696922	3	0.0692931	0.255945	1.2192	4	0.0960904	0.347701	1.14695	4	0.118788	0.378861	1.01949	4	0.870313	0.955914	0.987754	4	0.850315	0.961121	0.875001	4	0.215478	0.497358	1.05982	3	0.646435	0.90642	1.3477	4	0.0281972
468	AGR53437.1	12	28578.1	AGNSTYAR;GFYDILR;TCGPLQTALDLWK;MSGVDHIHAGTVVGK;NEGADYFNNQVGPQILR;GSYLNITGAEMEEVYK;GSYLNITGAHMEEVYK;GSYLNITGANMEEVYK	0;0;0;0;0;1;1;1	3	4	54669;54670;65143;296693;296694;296696;296698;296699;296700;296701;296703;296704;296706;296707;296708;296709;296710;296711;296712;296713;296714;296716;296717;296718;296719;296721;296722;296724;296725;296726;296728;297448;297458;297463;297464;297465;297477;297478;300108;300111;300113;300115;300123;300125;300126;300127;300128;300129;300130;300131;300134;300135;300137;300138;300139;300141;300142;300…	-	ribulose-1,5-bisphosphate carboxylase/oxygenase large subunit, partial (chloroplast) [Thalassiosira sp. 1 SEH-2013]	2.0839	5	0.00139986	0.0163802	1.21056	5	0.185681	0.556735	1.98378	5	0.0591941	0.235217	1.05337	4	0.590641	0.865517	1.4882	4	0.00139986	0.0154758	1.3535	5	0.116488	0.329684	1.01626	5	0.834017	0.960479	1.0078	5	0.952105	0.98248	1.03249	4	0.763024	0.943422	1.40775	4	0.0161984
469	AIR76168.1	1018	9398.07	DGRPVDEVGYYNPITK;RDGRPVDEVGYYNPITK	1;1	2	4	333716;333720;333724;344837	YP_009093495.1;YP_009093222.1;AIR75895.1	ribosomal protein S16 (chloroplast) [Thalassiosira weissflogii]	0.969039	3	0.811619	0.945781	0.879188	4	0.413259	0.726529	0.55655	4	0.0291971	0.143672	0.693669	3	0.019998	0.128428	0.953055	4	0.684732	0.90169	0.394801	4	0.00019998	0.00281222	0.968667	4	0.90331	0.979943	0.287935	3	0.0001	0.00166743	1.10546	4	0.520148	0.8387	1.0853	4	0.785121
470	EED86316.1	891	56074.4	VTYELENLPMR;NQIGSSAMAYK;GTTGTQATFLELFNGDHDK	1;0;1	2	4	205256;205265;209343;231942;348879	XP_002297353.1	adenylosuccinate lyase [Thalassiosira pseudonana CCMP1335]	0.997357	4	0.982702	0.993174	0.906973	3	0.334767	0.685302	1.10369	3	0.556244	0.827247	1.05913	3	0.660034	0.891065	1.33183	4	0.0850915	0.311024	1.33103	4	0.09979	0.293794	0.994992	4	0.966203	0.99095	0.996012	4	0.969803	0.988873	0.757753	4	0.186681	0.527541	0.993139	4	0.954005
471	EED86625.1	1560	135490	EAAPDMLFQMLLR;HEIPGGQYTNLLFQSK	1;1	2	4	249419;252836;252837;334549	XP_002296897.1;XP_002296990.1;EED86718.1	predicted protein [Thalassiosira pseudonana CCMP1335]	0.64494	4	0.0227977	0.124113	1.03362	4	0.79582	0.921509	0.627136	4	0.040396	0.179195	0.923384	3	0.539046	0.837691	0.870584	4	0.110589	0.364317	0.401787	4	0.00509949	0.0342503	0.957848	4	0.685431	0.892355	0.442943	4	0.00569943	0.038301	1.47131	4	0.0039996	0.0425756	1.54471	3	0.0220978
472	EED87350.1	25	21708.9	TSHITKPPMPIL;IMIHQPLGGAQGQAADIEIQAK	1;1	2	4	267314;358735;358736;359214	XP_002295284.1;EJK64740.1	predicted protein [Thalassiosira pseudonana CCMP1335]	0.89037	4	0.263374	0.573188	1.10648	4	0.517748	0.800843	1.46008	4	0.0631937	0.243053	1.79922	4	0.0261974	0.154779	1.33766	3	0.0327967	0.16601	1.80862	4	0.0221978	0.104597	1.13541	4	0.385461	0.755158	2.00846	3	0.00189981	0.0169384	0.625703	4	0.187381	0.527541	0.489975	3	0.00109989
473	EED87369.1	1554	45838.3	TFLFSDLDYVGR;FFPPLQGAQGK	1;1	2	4	222074;222076;222077;236671	XP_002295303.1	probable tryptophanyl tRNA synthetase [Thalassiosira pseudonana CCMP1335]	0.805018	4	0.174883	0.458717	0.806501	4	0.0224978	0.156529	0.909802	4	0.454755	0.751388	0.887844	4	0.223878	0.583831	0.841266	4	0.0588941	0.248541	1.02875	3	0.847615	0.94658	0.908996	4	0.393261	0.755158	1.31007	3	0.0879912	0.287935	0.706081	4	0.00769923	0.06891	0.656068	4	0.00559944
474	EED87452.1	4	48607.6	LALVPGESFGAPGTVR;KLALVPGESFGAPGTVR	1;1	2	4	253784;253785;321852;321853	XP_002295148.1	aspartate aminotransferase [Thalassiosira pseudonana CCMP1335]	0.960712	4	0.681132	0.8824	1.18654	3	0.152285	0.512645	1.08857	4	0.49675	0.779989	1.03604	4	0.911909	0.97334	1.09989	3	0.385061	0.724857	1.41106	4	0.0606939	0.216764	1.01282	3	0.882512	0.97435	1.41483	4	0.0532947	0.204221	0.931926	4	0.465253	0.80087	0.923719	4	0.464454
475	EED87694.1	124	66785.5	LDGMLIDGK;FQGVNLYVK;DEFSAMGTITSAR;GFGFVCYSTPEDATR	0;0;1;1	2	4	178335;207310;210560;210561;280110;280111	XP_002294914.1	polyadenlyte binding protein, partial [Thalassiosira pseudonana CCMP1335]	0.695747	4	0.0109989	0.0718117	0.697793	3	0.00889911	0.0876295	0.672657	4	0.0257974	0.133509	0.770887	4	0.116988	0.394988	0.911139	4	0.362864	0.710164	0.947579	4	0.688631	0.869745	0.871893	4	0.345565	0.725128	1.04087	3	0.784022	0.921686	0.888969	4	0.241476	0.597545	0.930289	4	0.584142
476	EED87971.1	978	100429	GGEIIEPLVSK;SLGASADWTR;FTMDPALSVGVSEAFVR;YSLVTGVTPGQDIPLNMDK	1;0;1;1	3	4	11416;225410;114863;114864;114874;114877;299698;348697	XP_002294611.1	valine--tRNA ligase-like protein [Thalassiosira pseudonana CCMP1335]	1.40302	4	0.0171983	0.0999719	1.04825	4	0.738726	0.90742	1.41245	3	0.0782922	0.27902	0.971731	4	0.849915	0.950588	1.1195	3	0.313469	0.665973	0.860151	4	0.20278	0.46731	1.01009	4	0.947005	0.985292	0.706952	4	0.0108989	0.0629133	1.10518	4	0.337166	0.707774	1.33238	4	0.112889
477	EED88078.1	44	55623.4	SLAPNVLNIGR;QGVVGISEIIIK;IVPENTPVTDAFLVADDILR	1;1;1	3	4	142789;142790;251549;339063	XP_002294718.1	predicted protein [Thalassiosira pseudonana CCMP1335]	1.2459	4	0.0575942	0.232701	1.17273	4	0.145485	0.501271	1.0018	4	0.990801	0.997184	0.964856	4	0.875312	0.962363	1.05397	4	0.566743	0.846124	1.17994	4	0.190681	0.447491	0.998068	4	0.975702	0.994002	1.11824	4	0.290771	0.594822	1.46042	3	0.0215978	0.14498	1.40391	3	0.0565943
478	EED89429.1	946	56362	VFIAGDDFK;YVPYVADSK	1;1	2	4	192827;200601;200609;200610	XP_002292968.1	myo-inositol-1-phosphate synthase-like protein, partial [Thalassiosira pseudonana CCMP1335]	1.18588	4	0.116988	0.364098	1.02948	4	0.688831	0.890699	1.52127	4	0.0146985	0.0912829	1.32172	4	0.020098	0.128428	1.01236	4	0.879312	0.960064	1.24609	4	0.0876912	0.272766	1.16382	4	0.110289	0.431499	1.44887	4	0.0472953	0.188015	0.803901	3	0.134887	0.451042	0.634269	4	0.0216978
479	EED89747.1	634	46333.6	VSAVDSLR;VFLDPAMYGDQELR	1;1	2	4	56246;56247;56265;270010	EJK54830.1;XP_002293286.1	predicted protein [Thalassiosira pseudonana CCMP1335]	1.22388	4	0.394061	0.71152	1.15993	4	0.320568	0.681155	0.927365	4	0.546045	0.820207	0.886646	4	0.219778	0.579362	0.862434	3	0.20058	0.511962	1.49845	4	0.0107989	0.0589032	0.728537	3	0.00809919	0.0824562	1.15169	3	0.323168	0.631949	1.44181	3	0.0254975	0.159825	1.71698	3	0.00769923
480	EED89783.1	765	55181.5	SIQNFPIGGR;AIMILGGEVGSK	1;1	2	4	122403;122404;122408;233248	XP_002292587.1	predicted protein [Thalassiosira pseudonana CCMP1335]	1.1593	4	0.263374	0.573188	1.04038	4	0.642536	0.871761	1.30258	4	0.383462	0.699002	1.17353	4	0.40206	0.749237	1.99677	4	0.0009999	0.0120121	1.89743	4	0.0128987	0.06769	1.36618	4	0.00149985	0.0257403	1.33578	4	0.0240976	0.115119	0.716573	4	0.010099	0.0814712	0.9938	4	0.970903
481	EED89895.1	1557	60619.1	ASSSFGL;VGPSLGSFSVSAK;LPVCHQLADGSYEPITVLEAVVR	1;1;1	3	4	23359;247187;357782;357783	XP_002292699.1	predicted protein [Thalassiosira pseudonana CCMP1335]	1.60415	4	0.0985901	0.323606	1.32966	4	0.0545945	0.28682	1.26765	3	0.185381	0.482205	1.46863	3	0.0155984	0.109798	1.34091	4	0.0715928	0.287328	1.95541	3	0.00469953	0.0322868	1.20851	4	0.167083	0.526686	1.77824	3	0.00509949	0.0350541	0.909461	4	0.334167	0.704801	0.962346	4	0.720528
482	EED90332.1	1002	57511.9	MNVLHPAAK;SGANVVLIQK;YLIAGGGAAETEASLR;IALIQFCLSAPK	1;1;1;1	4	4	184497;197396;255256;272164	XP_002292357.1	t-complex protein 1 delta subunit [Thalassiosira pseudonana CCMP1335]	1.04397	3	0.742226	0.907131	1.09406	4	0.573743	0.839873	1.08774	4	0.50285	0.785557	1.2068	4	0.342866	0.697726	0.878654	4	0.383762	0.724501	0.938367	4	0.625937	0.828447	1.16713	4	0.460354	0.803835	1.01537	3	0.913909	0.974831	0.826645	3	0.180282	0.518095	0.702937	4	0.186981
483	EED91187.1	1332	79111.2	GQVADMLK;LDDVVDLVIPR;FGLGAEVGISTGR;GPVGVEGLLTVK;AGTSVVANDDGRPSLTR	0;0;0;1;1	2	4	146651;146652;151659;174497;177641;177642;231823;231824;231825;281732	XP_002291080.1	gamma-glutamyl phosphate reductase [Thalassiosira pseudonana CCMP1335]	0.589132	3	0.00689931	0.0501313	0.778063	3	0.0415958	0.241793	0.798432	3	0.20098	0.50598	1.04431	3	0.740126	0.912248	0.686921	3	0.0110989	0.072728	0.509596	4	0.0329967	0.138126	0.883199	3	0.178582	0.53457	0.565898	4	0.190181	0.463486	0.689257	4	0.00559944	0.0538684	0.616116	4	0.0242976
484	EED91482.1	1271	39662.2	QCDAIVHVVR;APQAAGVIHGDFER;GASDGEGLGNQFLATIR	1;1;1	3	4	156277;156283;230496;280000	XP_002291375.1	GTP binding protein [Thalassiosira pseudonana CCMP1335]	0.749673	4	0.125887	0.379982	0.882192	4	0.612239	0.858844	0.887496	3	0.485551	0.775406	1.03219	3	0.808319	0.936576	1.16098	4	0.174183	0.474852	1.06161	4	0.592241	0.811563	1.3199	4	0.173583	0.53237	1.26219	4	0.317768	0.624782	0.851252	4	0.154785	0.48176	0.72348	4	0.175782
485	EED91696.1	246	53645	AMDILADILLR;DTGLFGLYAVAER	1;1	2	4	171253;171254;176380;217104	XP_002291589.1	probable mitochondrial processing peptidase [Thalassiosira pseudonana CCMP1335]	0.898331	3	0.430957	0.736861	1.20387	4	0.472553	0.76764	0.803062	4	0.262974	0.577444	0.90412	4	0.29817	0.664825	0.938059	4	0.424258	0.760709	1.2042	3	0.242676	0.514113	1.04071	4	0.726527	0.914886	1.12289	3	0.413759	0.710724	1.09776	4	0.821218	0.954991	0.983315	4	0.970603
486	EED92042.1	1185	91356.7	DVVQGPGVTGR;VVVTSTYRPER;RFEIQTVGSSMK	0;1;0	1	4	17597;121336;121343;121344;190572;190573;190574;190576;276326;276329;279451;279458	XP_002290290.1	predicted protein [Thalassiosira pseudonana CCMP1335]	0.946311	4	0.571143	0.832977	0.839653	4	0.149885	0.509609	0.888514	4	0.346165	0.670757	0.788218	4	0.246375	0.604111	1.2925	4	0.0150985	0.0928583	1.01619	4	0.889311	0.964894	1.07028	4	0.49775	0.821379	0.842344	4	0.171083	0.434584	0.922494	3	0.534347	0.843246	1.07019	3	0.635436
487	EED92139.1	1447	130346	GLSLMLGSMR;GVYSSPDSLLQR;EFNTGSFPK;ATIPSLELSDLK	1;1;0;1	3	4	124700;194359;194360;196695;196697;196698;257718	XP_002290387.1	hypothetical protein THAPSDRAFT_22863 [Thalassiosira pseudonana CCMP1335]	0.996233	4	0.968903	0.987536	0.834182	4	0.318868	0.680475	0.84605	3	0.325067	0.654862	0.950952	3	0.718728	0.905182	0.836579	4	0.215578	0.529976	0.780369	3	0.147685	0.384969	0.9528	3	0.573243	0.853705	0.900201	3	0.461354	0.749232	1.26234	4	0.0457954	0.235388	1.27585	4	0.0592941
488	EED92404.1	377	96906.6	GDYWVLDITAR;YMGLPSDNVEGFR	1;1	2	4	40709;191033;234409;234442	XP_002290652.1	predicted protein [Thalassiosira pseudonana CCMP1335]	0.907635	4	0.339366	0.657567	1.2242	4	0.0951905	0.394744	0.850675	4	0.215278	0.523234	1.19874	4	0.0846915	0.323335	1.11478	4	0.490751	0.801516	1.03375	4	0.847615	0.94658	0.96536	3	0.678932	0.892355	1.11025	4	0.651235	0.866115	1.09537	4	0.592941	0.881571	1.02583	4	0.906809
489	EED92802.1	5	60260.6	FVGMLHR;GVVDITTR;TPGQFMMR;LMWLVEK	1;1;1;1	4	4	59284;59552;91640;164706	XP_002289265.1;EJK78098.1	nitrite reductase-ferredoxin dependent, partial [Thalassiosira pseudonana CCMP1335]	0.805102	4	0.434857	0.737864	0.887507	3	0.248875	0.626611	0.781989	4	0.247575	0.561566	0.912149	4	0.338566	0.695663	2.33038	3	0.0001	0.00219734	1.22827	4	0.176282	0.427064	1.73916	4	0.00129987	0.0239017	1.35672	3	0.0637936	0.230707	0.55664	4	0.0889911	0.353028	0.544589	4	0.020098
490	EED92873.1	146	164772	APMFSFTR;SVGEVMSIGR;SFPFVSK;ATGEVLQK;IMGVDCGMK;AASSLGDWLK;ATGYPLAFVAAK;TMGVDFIEAATK;FGLPAMFESYK;IGSSIEFDWCGVSAIR;LALGIPLNEVQNAVTK;ADHTYFLPVTPDFVEEIIK	0;0;0;1;0;0;0;0;0;0;1;1	3	4	88492;106581;111096;111099;130957;141624;192510;202141;241198;241199;241200;256848;256861;260141;258211;258218;261541;261550;294882;294885;294886;319693;319695;356846	XP_002289336.1	CPSase [Thalassiosira pseudonana CCMP1335]	0.873545	3	0.326667	0.645028	1.25162	3	0.0613939	0.302765	0.866542	4	0.39636	0.70818	1.21118	4	0.429357	0.775252	1.20467	3	0.123488	0.384991	0.887825	3	0.436456	0.706494	1.13596	4	0.385761	0.755158	1.06255	3	0.671333	0.881889	0.81851	4	0.169783	0.503195	0.751046	4	0.0955904
491	EED93043.1	1764	29295.4	IPLDDVVTILEPK;FVMEASAK;FVADGVFYAELNELLTR;ELTSVVQK;FGDGYMIK;GCEVIVSGK;TGHAGQVYTDVAVR;GLCAQAQAESLK	0;0;0;0;0;0;1;0	1	4	116875;288402;288404;288405;288407;288409;288410;288411;288412;153204;153211;158531;316511;316517;316523;159971;159972;159988;159989;168338;168346;173392;174142;231913;231916;291773;291775;255464;255473;255474	XP_002289506.1	predicted protein [Thalassiosira pseudonana CCMP1335]	0.637218	4	0.130087	0.386826	0.592212	4	0.069993	0.329785	0.617779	4	0.09959	0.332151	0.563467	4	0.0916908	0.33858	0.793658	4	0.19688	0.508278	0.592312	4	0.237276	0.507241	0.751397	3	0.0135986	0.116136	0.58755	4	0.154285	0.409833	0.969196	3	0.805519	0.95334	0.815447	4	0.313569
492	EED93201.1	1350	35809.3	AVGGALDFR;AEVPWLFEVSR;VQDCDIAAEFVRPK	1;1;1	3	4	70485;197259;197260;315925	XP_002289664.1	predicted protein [Thalassiosira pseudonana CCMP1335]	1.01948	3	0.885811	0.973136	1.07414	4	0.627937	0.860489	0.671613	4	0.219478	0.525638	0.973152	4	0.780022	0.929491	0.71699	3	0.019998	0.111568	0.83051	4	0.132487	0.359422	0.789668	4	0.0605939	0.307517	1.01993	3	0.888711	0.966032	1.218	3	0.168683	0.502419	0.957271	4	0.790421
493	EED93221.1	606	54265.9	LVTYVCGIENIR;FGSVPHAGYGLGFER	1;1	2	4	223117;223129;223130;258162	XP_002289684.1	asparaginyl-trna synthetase [Thalassiosira pseudonana CCMP1335]	1.47131	4	0.0588941	0.236363	1.43699	4	0.0249975	0.16871	1.139	4	0.487651	0.776534	1.15356	4	0.344466	0.697726	1.13214	4	0.206579	0.519437	1.20992	4	0.162784	0.407209	0.84446	4	0.0340966	0.211035	0.877904	4	0.315268	0.622586	1.21125	4	0.0832917	0.342515	1.63582	4	0.00249975
494	EED93318.1	1580	61027.5	QFVNFVR;ASFDLSMTDISEIAR	1;1	2	4	71651;270429;270441;270442	XP_002289781.1	probable amp deaminase, partial [Thalassiosira pseudonana CCMP1335]	1.05457	3	0.688031	0.884845	1.02074	3	0.837416	0.940788	0.808076	4	0.132687	0.397918	0.749486	4	0.233077	0.593406	0.756157	4	0.173683	0.474206	0.872751	4	0.552445	0.78361	0.943944	4	0.508949	0.82179	1.09159	4	0.417658	0.714342	1.41087	4	0.00819918	0.0712576	1.179	4	0.324068
495	EED93645.1	1021	9389.71	GFAFVSFVHR;LQGHGYDHLILK	1;1	2	4	146832;146836;146837;278590	XP_002288209.1;EJK47313.1	predicted protein, partial [Thalassiosira pseudonana CCMP1335]	0.970686	3	0.823218	0.949704	0.890493	4	0.678032	0.885656	0.92946	3	0.666133	0.881489	1.34927	4	0.306969	0.670181	1.03031	4	0.706229	0.906813	1.02387	4	0.921008	0.971483	1.41557	4	0.0409959	0.240634	1.5033	4	0.285271	0.587842	0.816896	4	0.461654	0.800415	0.570996	4	0.20378
496	EED94936.1	1290	37723.8	SIIFANYLAR;AQSQFQGMDVR;ATFLVISHAQAK	1;1;1	3	4	147333;178468;178469;257552	XP_002287493.1	rag-type gtp-binding protein [Thalassiosira pseudonana CCMP1335]	1.09384	4	0.70103	0.886495	0.946211	4	0.454155	0.756266	1.00436	4	0.984902	0.993173	0.871406	4	0.332967	0.692497	0.825096	4	0.116288	0.374869	0.681024	4	0.0350965	0.144894	1.05053	3	0.565343	0.850375	0.999139	4	0.995	0.997215	1.29263	4	0.344366	0.716201	0.93226	4	0.777822
497	EED95831.1	418	45663.7	NFGLYGER;SAVMSQLK;DSSGKPWILPSVR	1;1;1	3	4	83766;152362;286800;286808	XP_002286190.1	aspartate aminotransferase [Thalassiosira pseudonana CCMP1335]	0.921192	3	0.545345	0.820763	1.04398	4	0.724828	0.902269	0.96797	3	0.846615	0.939443	1.06792	4	0.673733	0.892606	0.991729	4	0.956804	0.986313	1.33969	3	0.0987901	0.292471	0.840398	4	0.258074	0.638805	1.29843	4	0.210879	0.491323	0.876612	3	0.326367	0.700638	1.12302	4	0.386961
498	EED96133.1	837	8709.09	YNEWLVCLK	1	1	4	244674;244679;244680;244681	XP_002286492.1	predicted protein, partial [Thalassiosira pseudonana CCMP1335]	3.38083	4	0.00049995	0.00763483	2.01313	4	0.00139986	0.0254803	2.4709	4	0.0029997	0.0281378	1.52048	4	0.00479952	0.0462499	1.39311	4	0.00439956	0.0370468	3.73962	4	0.00129987	0.0125794	1.34885	4	0.00189981	0.0292603	3.65959	4	0.00039996	0.00461749	0.796888	4	0.049795	0.24678	0.806247	4	0.0831917
499	EED96333.1	512	33492.5	SSPFFLAIR;ELLLLSSVTNR	1;1	2	4	107473;171575;171576;171577	XP_002286692.1	predicted protein [Thalassiosira pseudonana CCMP1335]	1.25126	4	0.325567	0.643987	1.12042	4	0.354065	0.692196	0.763533	3	0.139686	0.41107	0.884294	4	0.692031	0.898443	0.960927	4	0.616638	0.877018	0.67764	4	0.178682	0.4308	0.958561	4	0.725527	0.914886	0.683426	4	0.0492951	0.193001	1.5248	4	0.00259974	0.0313888	1.3099	3	0.105389
500	EED96363.1	1575	60323.2	TFIMPGQETR;GTTATEIIQMAR	1;1	2	4	150963;186394;186395;190778	XP_002286722.1	glutamine phosphoribosylpyrophosphate amidotransferase [Thalassiosira pseudonana CCMP1335]	0.731439	4	0.0163984	0.0972034	0.977591	4	0.856914	0.948501	0.851768	3	0.342566	0.670014	1.01864	4	0.936306	0.979264	0.625555	4	0.0188981	0.107656	0.580994	4	0.00249975	0.0197349	0.814555	4	0.146385	0.487356	0.751865	4	0.0260974	0.121451	1.12522	4	0.549745	0.849537	0.8856	4	0.692631
501	EED96472.1	1710	49612.9	GNIPEGLYL;AICTEAGMLALR;GVILYGEPGTGK	1;1;1	3	4	89363;190229;236967;236970	XP_002286831.1	26S proteasome ATPase regulatory subunit 4 [Thalassiosira pseudonana CCMP1335]	1.01935	4	0.855614	0.960372	1.04168	4	0.743426	0.909461	0.850805	3	0.340166	0.668483	0.833832	4	0.182982	0.518448	0.837067	4	0.0546945	0.240389	0.76025	4	0.307769	0.589345	0.860975	4	0.049995	0.274668	0.774487	4	0.319168	0.625486	1.03653	3	0.778522	0.947965	1.06762	4	0.547245
502	EJK44028.1	1775	60458.8	GMDLYFER;LDATSIGQR	1;1	2	4	13082;85196;85200;85204	-	hypothetical protein THAOC_37468 [Thalassiosira oceanica]	1.11196	4	0.355464	0.67379	0.941101	4	0.745825	0.910425	1.03762	3	0.828817	0.938441	0.792237	4	0.245575	0.604111	0.822841	4	0.0412959	0.194728	0.837227	4	0.145085	0.382924	1.10228	4	0.50115	0.82179	1.02287	3	0.874613	0.961647	1.46132	4	0.00469953	0.0474969	1.10862	4	0.518948
503	EJK44062.1	1032	102843	GLCTLYADYFR;SGYYDVTITKPR;ALFDYTIYPAALMHK	1;1;1	3	4	208865;279670;279672;329064	-	hypothetical protein THAOC_37432 [Thalassiosira oceanica]	1.1973	4	0.548845	0.820763	0.959742	3	0.719328	0.902269	1.05691	4	0.845315	0.939443	1.04016	4	0.854815	0.953774	0.8814	4	0.138186	0.412954	0.957065	3	0.770323	0.916445	0.922882	4	0.424858	0.775677	0.944641	4	0.716128	0.898153	1.17212	4	0.445355	0.786962	1.14556	4	0.686031
504	EJK45475.1	488	43374	WTEQLTDQIWSVR	1	1	4	271490;271513;271514;271517	XP_002287567.1;EED95010.1	hypothetical protein THAOC_35909, partial [Thalassiosira oceanica]	0.762686	3	0.0858914	0.298113	0.992888	4	0.966603	0.987986	0.802141	4	0.127387	0.388855	0.933638	4	0.858214	0.953976	0.947174	4	0.662834	0.894032	0.928607	4	0.656034	0.847103	0.7952	3	0.0318968	0.205922	0.795731	4	0.286471	0.58964	0.963908	4	0.712629	0.927785	1.08649	4	0.457554
505	EJK45790.1	1765	29165.1	IPLDDVVTILEPK;FVMEASAK;FVADGVFYAELNELLTR;ELTSVVQK;FGDGYMIK;GCEVIVSGK;VSIMLPHDPK;GLCAQAQAESLK;KFVADGVFYAELNELLTR	0;0;0;0;0;0;1;0;1	2	4	116875;288402;288404;288405;288407;288409;288410;288411;288412;153204;153211;158531;316511;316517;316523;159971;159972;159988;159989;168338;168346;173392;174142;224261;224265;227956;255464;255473;255474;350530	-	hypothetical protein THAOC_35575 [Thalassiosira oceanica]	0.737624	4	0.0608939	0.241698	0.781531	4	0.272273	0.647276	0.700146	4	0.0327967	0.156676	0.744392	4	0.147085	0.453222	0.796105	3	0.0738926	0.291183	0.492751	4	0.00019998	0.00281222	0.849047	4	0.164984	0.522212	0.57872	3	0.0116988	0.0660489	1.01886	4	0.942306	0.990535	0.741457	3	0.161084
506	EJK46104.1	287	122349	QIDQGGHDALVGK;YGVQDSVGFAIR;NGGGPIEHLK	1;1;0	2	4	94751;267810;191777;191778;195450	-	hypothetical protein THAOC_35252 [Thalassiosira oceanica]	0.821806	4	0.509949	0.798326	0.86376	3	0.170683	0.537099	0.865023	4	0.374063	0.692595	1.09749	4	0.710129	0.90383	1.10986	4	0.469853	0.788338	1.49384	4	0.19828	0.461653	1.208	3	0.0607939	0.307517	1.57591	4	0.09959	0.313104	0.516958	4	0.00119988	0.0189349	0.482606	4	0.00429957
507	EJK46258.1	45	65130.2	TNVIPIIEDAR;GNVYAVEFSHRPGR;ASCIDSTAAPEAVFR;IVALNSHYFLK;DHCVLISQYRPTK;LQSENFKPLEQLTLEPYER	0;1;0;0;1;0	2	4	170245;170246;170248;170252;170253;170254;170259;257266;257267;258336;258342;258343;258345;258346;261443;261446;312269;312272;360036;360037;360038;360043;360044	-	hypothetical protein THAOC_35086 [Thalassiosira oceanica]	0.843267	23	0.00289971	0.0282447	0.971577	23	0.640336	0.870608	0.770819	23	0.0001	0.00211861	0.903024	23	0.0882912	0.332152	0.884406	23	0.00269973	0.0252068	0.838932	22	0.00029997	0.0038845	0.950414	23	0.253375	0.633261	0.901166	22	0.0426957	0.173187	0.935849	23	0.40236	0.760623	0.914751	22	0.270773
508	EJK47805.1	1004	62228.6	TLGTLWSSSLFPGR;IIDPFVSGVYAGDPTTLSMK	1;1	2	4	243071;351714;351716;352454	-	hypothetical protein THAOC_33459 [Thalassiosira oceanica]	0.917518	3	0.525447	0.809745	0.818692	4	0.0291971	0.191321	1.10504	4	0.429557	0.733996	0.860091	4	0.135286	0.433013	0.870043	4	0.478352	0.7929	0.621	4	0.00529947	0.0349416	0.972066	4	0.740726	0.921815	0.636656	3	0.0152985	0.0820016	1.48404	3	0.0541946	0.263503	1.10342	4	0.369763
509	EJK47930.1	670	45379.2	VSQLCMR;GENEYFTALK;EPACASLSLSELCK	0;1;1	2	4	67490;232412;305996;306018;306022	-	hypothetical protein THAOC_33313 [Thalassiosira oceanica]	0.743021	4	0.019598	0.111056	0.890491	5	0.173383	0.539612	0.671038	4	0.0171983	0.0999165	0.796386	5	0.0827917	0.32084	1.01407	5	0.89511	0.962727	1.12101	5	0.210479	0.47536	1.08575	4	0.212879	0.582042	1.14754	5	0.116788	0.347662	0.659197	5	0.0335966	0.1956	0.63939	5	0.0115988
510	EJK50688.1	914	26174.8	LYAEEMALAYGR;DFFYASSACVYNEAK	0;1	1	4	210915;210916;214779;214788;329170;329171;329172;329174	-	hypothetical protein THAOC_30273 [Thalassiosira oceanica]	0.915886	4	0.672633	0.878959	1.21113	4	0.251675	0.630762	0.708291	4	0.0552945	0.225306	1.00032	4	0.9962	0.9995	1.4929	4	0.00119988	0.0139496	1.34919	4	0.194681	0.455097	1.3395	4	0.019698	0.150406	1.23931	4	0.347965	0.657592	0.737029	4	0.211679	0.558373	0.792336	4	0.390061
511	EJK51092.1	695	145010	GLVDSAAMAR;FGEPVIHGFTR;DSLLALGAGIDGGK	0;0;1	1	4	98267;98286;176304;176305;257707;257708;257709;257710	-	hypothetical protein THAOC_29768 [Thalassiosira oceanica]	1.05693	4	0.641136	0.868667	1.14295	4	0.121588	0.449717	1.22662	4	0.133887	0.400182	1.34019	4	0.0164983	0.113908	0.733127	4	0.0157984	0.0955327	0.916488	4	0.433157	0.704957	0.906628	3	0.268673	0.649864	0.997575	4	0.988601	0.993566	1.05205	4	0.60454	0.889261	0.96914	4	0.769123
512	EJK53022.1	1445	72379.3	TFELAAAVNR;TLLIDEDTCATNFMIR	1;1	2	4	123294;311266;311269;311270	-	hypothetical protein THAOC_27607 [Thalassiosira oceanica]	0.766422	4	0.271873	0.584624	0.802166	4	0.189681	0.560336	0.676561	4	0.249575	0.562953	0.71485	4	0.0778922	0.310535	0.87891	4	0.130387	0.393206	0.679856	4	0.070293	0.23431	0.880473	3	0.172083	0.53237	0.770708	4	0.0809919	0.272648	1.0931	4	0.361564	0.732621	1.0503	4	0.789421
513	EJK54753.1	192	80231.6	VSSAYDWIR	1	1	4	124675;124677;124682;124705	EJK47364.1	hypothetical protein THAOC_25591, partial [Thalassiosira oceanica]	0.930878	4	0.589741	0.841705	0.955448	4	0.637636	0.869811	1.80196	4	0.0225977	0.122218	1.84615	4	0.00079992	0.0127562	1.17657	4	0.337266	0.69531	2.00451	4	0.0730927	0.240524	0.696282	4	0.132587	0.468473	1.17672	4	0.332167	0.641192	0.544608	4	0.0757924	0.32698	0.913655	4	0.40486
514	EJK55119.1	97	85339	DDIVPLLR;DFYQSAFR;NKDDIVPLLR;GVVDSQDLPLNVSR;VMDIIINSLYSNR;VFINDKFEDIVPR	1;0;1;0;0;0	2	4	79735;106141;235051;235053;235054;237788;237789;237791;237792;237801;250097;250105;250130;309239;309243;309244	-	hypothetical protein THAOC_25185 [Thalassiosira oceanica]	0.688197	4	0.0277972	0.14031	0.878797	4	0.338566	0.685501	0.787054	4	0.0884912	0.303674	1.00874	4	0.925507	0.97334	0.787208	3	0.0647935	0.265359	0.705088	3	0.0636936	0.219633	0.80742	4	0.0341966	0.211035	0.790589	4	0.0511949	0.198284	0.932676	4	0.624238	0.896968	0.867867	4	0.280372
515	EJK55379.1	1082	71794.6	IMVGLEK;QPEVYSK;GVILDGPPGTGK;VDILDQALLRPGR;QYLESQLAVALGGR;NAPCIIFIDEIDAVGR;VTFSADGTQLLGVDTDGTR;KNAPCIIFIDEIDAVGR;TPGFSGAQLENLMNEAAISAAR;LEALPNDPDLLTQLTTHK;RTPGFSGAQLENLMNEAAISAAR;IKLEALPNDPDLLTQLTTHK;AVAGEAGVPFISISGSEFVEMFVGVGASR;EQTINQILVEMDGFDGNPGIITIAATNR	0;0;0;0;0;0;0;0;0;1;0;1;0;0	2	4	124011;143058;143059;228423;217996;230123;230124;230125;230126;230127;230128;230130;239234;239242;239243;239246;239250;239252;295900;295905;295908;315984;315999;316002;316003;316004;316005;316006;316007;316009;316011;316013;316014;316015;341710;341711;341712;342549;342554;342555;343540;343541;347194;347195;351191;351193;351194;351195;351962;351965;351966;351967;364739;364740;365043;365045;366481;…	-	hypothetical protein THAOC_24887 [Thalassiosira oceanica]	0.461158	3	0.0009999	0.0124263	0.560817	4	0.0001	0.00353298	0.501711	4	0.0166983	0.09828	0.536237	4	0.00029997	0.00607355	0.774624	4	0.0151985	0.0931553	0.389403	4	0.0001	0.0016362	0.764767	4	0.0166983	0.133556	0.382838	4	0.0001	0.00166743	0.590241	4	0.00069993	0.012225	0.596542	4	0.00139986
516	EJK56278.1	261	44336	ELFVMAR;VSGAELVQK;AVCTEAGMFALR;NIDLSTIAEK;GVLLYGPPGTGK;KIEFPNPNAENR;TMLELLNQLDGFEPAQNIK	1;0;0;1;0;0;0	2	4	60766;64625;168424;195305;199509;216166;216194;229298;229300;229303;229304;229306;284695;354541	-	hypothetical protein THAOC_23874 [Thalassiosira oceanica]	0.539446	4	0.00119988	0.0143191	0.724086	4	0.00559944	0.0615256	0.446019	3	0.00179982	0.018956	0.618254	3	0.00539946	0.049642	0.609594	4	0.00069993	0.00941249	0.54351	4	0.00369963	0.0270705	0.778728	4	0.00549945	0.0604269	0.692259	4	0.0246975	0.117053	1.00173	4	0.993801	0.997683	0.791957	4	0.273173
517	EJK56326.1	1773	118536	EIPTEVPWYR;VGPFNNPTETYR	1;1	2	4	185704;185717;212873;212877	-	hypothetical protein THAOC_23816 [Thalassiosira oceanica]	0.536676	4	0.00729927	0.0515815	0.765005	4	0.121788	0.449717	0.318636	4	0.00769923	0.055688	0.461387	4	0.0274973	0.160356	0.551789	4	0.00469953	0.0390256	0.462423	4	0.019998	0.0978163	0.64105	4	0.0453955	0.260009	0.656095	3	0.0206979	0.1056	1.25812	3	0.117788	0.422114	1.26334	4	0.285171
518	EJK58017.1	1618	27749.6	NTYGYLEPDLWK;SGMPHTVPTK;EAEIIDYFLK;IGSIEEIFLFSIPVK	0;1;0;0	1	4	126221;295913;295923;295927;295935;295936;203957;203958;203963;203964;248284;248285;248286;248287;248289;248296;248297;248311;321063	-	hypothetical protein THAOC_21891 [Thalassiosira oceanica]	0.634823	4	0.0511949	0.216894	0.590359	4	0.0217978	0.154644	0.774022	4	0.212579	0.52089	0.638943	4	0.0358964	0.191377	0.77431	4	0.0524948	0.234147	0.442638	4	0.00949905	0.0529359	0.846544	3	0.0905909	0.385011	0.556865	3	0.00459954	0.0327422	0.651397	4	0.00239976	0.03019	0.56729	4	0.0219978
519	EJK59365.1	1578	39223.6	EQVASVVSLYGPR	1	1	4	215302;215303;215304;215309	-	hypothetical protein THAOC_20426 [Thalassiosira oceanica]	1.24679	4	0.0944906	0.31708	1.35456	3	0.019698	0.143708	1.17359	4	0.214079	0.522433	1.14797	4	0.167083	0.490365	1.00681	4	0.947905	0.984864	0.954445	4	0.918808	0.971483	1.03697	3	0.669433	0.892355	0.870321	4	0.630437	0.851272	1.14429	4	0.517048	0.835732	1.24408	4	0.150985
520	EJK60198.1	1121	81549	AITGLGLK	1	1	4	119030;119031;119041;119043	-	hypothetical protein THAOC_19503 [Thalassiosira oceanica]	1.37002	4	0.0792921	0.284064	1.55158	4	0.00109989	0.020433	1.66826	4	0.0605939	0.237755	1.708	3	0.0029997	0.0327604	1.23475	4	0.115488	0.373926	1.34774	4	0.165383	0.410855	1.16657	3	0.112889	0.43467	1.36356	4	0.0235976	0.114246	0.611788	4	0.0029997	0.035503	0.60063	4	0.0314968
521	EJK61433.1	1655	13232.5	LMTTVPLDDFGPWEEK	1	1	4	337937;337940;337941;337945	-	hypothetical protein THAOC_18078 [Thalassiosira oceanica]	1.74939	3	0.0049995	0.0407652	1.13881	4	0.466953	0.76764	1.81571	3	0.0134986	0.0859048	1.53217	4	0.0309969	0.173467	1.60537	3	0.00219978	0.0216612	1.96976	4	0.00109989	0.010878	1.18104	4	0.0358964	0.219272	1.28418	4	0.0415958	0.169873	0.59381	4	0.0742926	0.322832	0.88378	4	0.546845
522	EJK62217.1	1798	43344	TLLFNVK;GGPQGGAFDKDLDYFR	1;1	2	4	138191;326393;326395;326396	-	hypothetical protein THAOC_17180 [Thalassiosira oceanica]	1.50525	3	0.0230977	0.124411	1.83488	3	0.00049995	0.0123412	1.22729	4	0.307269	0.632238	1.60494	4	0.00479952	0.0462499	1.22118	4	0.181382	0.482792	1.85875	4	0.0089991	0.0504622	1.16119	4	0.234177	0.609807	1.78752	4	0.00659934	0.0422968	1.50099	3	0.0156984	0.114803	1.33909	3	0.0869913
523	EJK62386.1	1100	98541.2	ELAAATALAR;GGAWMADCR	1;1	2	4	92689;92690;92691;103202	-	hypothetical protein THAOC_17004, partial [Thalassiosira oceanica]	0.631662	3	0.0145985	0.0894781	0.823704	4	0.0456954	0.258941	0.768922	4	0.362864	0.684837	0.746414	3	0.0480952	0.232353	1.11046	4	0.20228	0.513899	1.08996	4	0.476352	0.736627	1.30559	4	0.0823918	0.363007	1.33791	4	0.0234976	0.114068	1.04185	4	0.835816	0.961765	0.863232	4	0.333867
524	EJK62881.1	1760	61347.2	SPGVMMGYFK;YLSYLPISHGMER;TLEEMATIIYTSGSTGVPK	1;1;1	3	4	226969;252579;255738;346001	-	hypothetical protein THAOC_16491 [Thalassiosira oceanica]	0.983397	4	0.926507	0.982676	1.019	4	0.926107	0.974224	1.11147	4	0.615338	0.855112	1.15526	4	0.408059	0.754732	0.940037	3	0.570543	0.846885	0.926013	3	0.609639	0.820756	0.868107	4	0.369163	0.749135	0.810404	4	0.151985	0.40625	1.03121	4	0.871113	0.972166	1.00329	4	0.991701
525	EJK62964.1	1190	48632	RFDPNFLR;IGIVHLGAINK;APGVVPIVVSNPTVSK;GGGGIFNDMAVHDLDMTR;NDFTGNADMPYDFFLSR;AEVLGTSGMIATDNVYPNTAK	0;0;0;0;0;1	1	4	115277;223659;223660;223661;223662;223663;305946;310382;310383;310384;310385;312318;324182;353636;353637;353638;354321	-	hypothetical protein THAOC_16407 [Thalassiosira oceanica]	1.38308	17	0.00019998	0.00367718	1.13568	16	0.0386961	0.229376	1.90949	17	0.0001	0.00211861	1.60326	16	0.0001	0.00261133	1.32319	17	0.00059994	0.00864873	1.39	17	0.00039996	0.00486438	1.09017	17	0.0715928	0.343112	1.15214	17	0.039796	0.164765	1.1603	16	0.00229977	0.0293425	1.52665	14	0.0001
526	EJK62995.1	302	5776.16	NPLLYGPGPVAR	1	1	4	174509;174510;174511;174524	EJK74554.1	hypothetical protein THAOC_16373, partial [Thalassiosira oceanica]	0.803185	4	0.125487	0.379982	0.84985	3	0.137286	0.482693	0.595159	4	0.0117988	0.0772715	0.723479	4	0.0387961	0.200893	0.883694	3	0.274773	0.626651	0.700579	4	0.0768923	0.248932	1.05841	4	0.660434	0.887638	0.886943	4	0.260874	0.555767	1.52494	3	0.0128987	0.0974991	1.21406	3	0.213679
527	EJK63301.1	873	67573	VASLAELNR;WFVSEGTR;QEGPTALILSR;FGFSAPGDIVMK;NYINDGGNFGAGFDK	0;0;1;0;0	1	4	88613;88630;88631;88632;88639;88643;88644;88646;91147;152660;152706;152707;152708;254188;254191;254192;254193;254195;257292;257294;257295;308759;308762;308772	-	hypothetical protein THAOC_16053 [Thalassiosira oceanica]	1.74926	4	0.0511949	0.216894	1.05976	4	0.705829	0.895081	1.74572	4	0.121088	0.3773	1.06912	4	0.485551	0.805033	1.36198	4	0.178282	0.476843	1.22421	4	0.50185	0.752448	1.17172	4	0.159184	0.510142	1.06333	4	0.766723	0.910863	1.25876	4	0.09999	0.379498	1.45025	4	0.0115988
528	EJK66768.1	1009	78484	FPGDVTASQLNELR	1	1	4	248656;248658;248659;248661	-	hypothetical protein THAOC_12275 [Thalassiosira oceanica]	0.860321	4	0.382862	0.70293	0.946448	4	0.735926	0.905833	0.774448	4	0.0930907	0.313963	0.778819	3	0.0811919	0.316683	0.859793	4	0.119588	0.37968	0.755268	4	0.0406959	0.162462	0.816729	3	0.0479952	0.268594	0.745176	4	0.0226977	0.110782	1.12006	4	0.256174	0.616841	1.14161	4	0.443956
529	EJK66959.1	1640	48489	LDQCFADLK;AQAYISEK;MNIDTDTQWSYWEGIK	0;0;1	1	4	217632;217641;242245;345287;345289;345291;346244	-	class II fructose-bisphosphate aldolase [Thalassiosira oceanica]	1.27737	7	0.00589941	0.044667	0.896541	7	0.0632937	0.308257	1.8631	6	0.00289971	0.0273423	1.5127	7	0.00929907	0.0741457	2.32542	7	0.0029997	0.0277203	2.00176	7	0.00459954	0.031843	1.53772	7	0.0136986	0.116438	1.37524	7	0.0309969	0.137841	0.507167	7	0.00919908	0.0776955	0.706805	5	0.0121988
530	EJK67142.1	1654	48620.1	FLEVECWK;NIDSSLPVGTVFGIYR	1;1	2	4	217874;285435;285441;285447	XP_002295491.1;ACI64208.1	hypothetical protein THAOC_11863 [Thalassiosira oceanica]	1.57965	4	0.0229977	0.124411	1.44451	4	0.00219978	0.0341724	1.46793	3	0.0672933	0.253017	1.30788	4	0.0279972	0.161246	0.948268	4	0.654035	0.888554	1.93107	4	0.0380962	0.154444	1.1094	4	0.357464	0.734493	2.21283	4	0.0266973	0.122972	1.00683	4	0.946205	0.990535	0.945094	3	0.688831
531	EJK67611.1	212	53066.3	GAAHFYGMK;LEPLFSGGGQER;DDTLLVSVMAVNNEIGTR	0;1;1	2	4	184615;184621;185709;185710;315379;315381	-	hypothetical protein THAOC_11333 [Thalassiosira oceanica]	0.976661	4	0.839416	0.955511	1.12726	4	0.20448	0.577543	0.979914	4	0.933807	0.967099	1.1629	4	0.341366	0.697726	0.993276	4	0.962704	0.988649	1.21789	4	0.264474	0.539131	0.799138	4	0.0229977	0.165767	1.05904	3	0.689031	0.888929	1.03411	4	0.721628	0.931283	1.30651	4	0.0425957
532	EJK68366.1	1454	96733	DTTAWTIGR;EGILEAYTGIIQGLK	1;1	2	4	102309;102314;310862;310874	-	hypothetical protein THAOC_10458 [Thalassiosira oceanica]	0.511786	4	0.00039996	0.00655207	1.08146	4	0.779422	0.913546	0.603076	4	0.00579942	0.0456103	1.30566	4	0.383162	0.726033	0.770813	3	0.0487951	0.220927	0.504896	4	0.00539946	0.0350867	0.944112	3	0.49625	0.82116	0.643678	4	0.0626937	0.228566	1.02132	4	0.827817	0.95633	0.812395	4	0.089791
533	EJK69564.1	529	21005.3	TAVEMALMR	1	1	4	102685;107341;107354;111937	-	hypothetical protein THAOC_09164 [Thalassiosira oceanica]	1.5814	4	0.188481	0.473793	1.31133	4	0.225777	0.600075	1.31346	4	0.284772	0.604016	1.09763	4	0.469553	0.79503	0.989963	4	0.920808	0.975015	1.33089	4	0.323768	0.609098	1.21446	3	0.0561944	0.291822	1.49104	4	0.0459954	0.183269	1.44911	4	0.0357964	0.20436	1.30464	4	0.274173
534	EJK70893.1	440	59635.7	TAIAEGIAQR;IIQLEMEK;IRDEALLAAAK;NNPVLIGDPGVGK;LVGLDMGALIAGASYR;FQQVYIGEPSPEDTVSILR	0;0;0;0;1;1	2	4	105237;105246;105247;105251;105260;105261;190897;190907;232236;232237;232238;232239;256259;256260;264101;264102;337660;337662	-	hypothetical protein THAOC_07713 [Thalassiosira oceanica]	0.978483	4	0.90271	0.979075	1.13418	4	0.211679	0.585937	0.713766	4	0.105289	0.346666	0.868443	4	0.361464	0.708598	0.894203	4	0.445355	0.769916	0.846771	3	0.289571	0.570896	0.928465	3	0.383562	0.755158	0.923078	4	0.584342	0.826184	1.69866	4	0.00049995	0.0097762	1.77478	4	0.00069993
535	EJK72012.1	1790	76044.6	ELLDILR	1	1	4	62226;62227;62233;62234	-	hypothetical protein THAOC_06497, partial [Thalassiosira oceanica]	1.99043	4	0.00029997	0.00505183	1.96878	4	0.0001	0.00353298	2.29589	4	0.00989901	0.0675307	2.33901	4	0.00029997	0.00607355	1.78176	4	0.00019998	0.00371509	2.32051	4	0.00249975	0.0197349	1.23497	3	0.0425957	0.248406	1.74371	4	0.0079992	0.0486708	1.31348	3	0.0746925	0.323009	1.79508	4	0.00069993
536	EJK72506.1	238	60528.8	GAMIFYR;AVLDALGSVLSNK;YFESMPYR;LIVAGASAYSR;SSLVLIASENFTSR;ILELACIASNK;NTVPGDTSALNPGGIR;EMCAVGPSVDPELVQLR	1;0;0;0;0;1;0;0	2	4	62536;85054;257722;257727;257728;257729;257730;257731;257732;257733;257736;257737;257738;257744;123469;123471;128410;128416;128417;128421;128422;243487;243491;243492;243493;243498;243499;243500;243501;246328;246333;246334;253264;253265;253266;309642;309647;309649	-	hypothetical protein THAOC_05958 [Thalassiosira oceanica]	1.65706	38	0.0001	0.00219734	1.14588	37	0.00029997	0.00858009	1.45676	38	0.0001	0.00211861	1.02149	37	0.656434	0.891065	1.02349	37	0.472453	0.790864	1.28986	38	0.00019998	0.00281222	1.04647	38	0.140886	0.479352	1.38147	37	0.0001	0.00166743	1.28706	37	0.0001	0.0035271	1.20671	38	0.00019998
537	EJK72886.1	101	55744.8	LGITGTESVLQIVR;QLTYDANFSLTGFER	1;0	1	4	234881;234882;234883;234886;289162	-	hypothetical protein THAOC_05536, partial [Thalassiosira oceanica]	0.947624	4	0.580342	0.837291	1.05979	3	0.556844	0.828124	0.997344	4	0.983302	0.992672	1.031	4	0.861414	0.954654	0.82173	3	0.108789	0.363688	0.841024	4	0.161384	0.406281	0.941083	4	0.614039	0.874702	0.887042	3	0.40066	0.698537	1.13608	4	0.371163	0.739449	1.12412	4	0.289871
538	EJK73006.1	1369	31553.1	VVTESAYDAWYR;VQQLDVLCETK;LTSPTSQIQAYVFDVIR;LKEAASHQAEADK	0;1;0;1	2	4	228493;228494;266926;266931;266932;314371;322237	-	hypothetical protein THAOC_05399 [Thalassiosira oceanica]	0.841349	4	0.328467	0.646177	0.710289	4	0.0291971	0.191321	0.70952	4	0.109089	0.353686	0.598016	4	0.00089991	0.0141012	0.690763	4	0.0911909	0.326692	0.659113	4	0.0630937	0.219633	0.981408	4	0.885611	0.974825	0.945083	4	0.69703	0.891987	0.966463	4	0.717928	0.928507	0.678743	4	0.010399
539	EJK73605.1	227	54113.3	DILSVILGGYGTK;SLAAGYAGVDNPVFLK	0;1	1	4	267471;267472;312943;312944;312945;312951	-	hypothetical protein THAOC_04758 [Thalassiosira oceanica]	1.10275	4	0.335166	0.653647	0.900916	4	0.177182	0.544223	0.934733	4	0.591041	0.840808	0.800196	3	0.111489	0.38409	0.68616	4	0.00749925	0.0560732	0.562751	4	0.0224978	0.105184	0.966607	4	0.594541	0.866798	0.799685	4	0.0648935	0.231891	1.54164	4	0.00949905	0.0791148	1.12836	4	0.274473
540	EJK73845.1	379	56783.2	FVLDGVPR;NQLTVTPIK;SLDGTVTLPGSK;IPDAAMTLAVAALFAEGPTTIR	0;1;1;0	2	4	69750;193410;233211;233212;233213;342415	-	hypothetical protein THAOC_04512 [Thalassiosira oceanica]	1.03104	4	0.781522	0.930801	0.93103	3	0.469353	0.76764	1.41861	4	0.0548945	0.224693	1.38287	4	0.0125987	0.0941692	1.31315	4	0.0106989	0.0714055	1.85838	4	0.00109989	0.010878	1.22858	4	0.0869913	0.375919	1.75302	4	0.00059994	0.00647001	0.558674	4	0.0116988	0.0923079	0.586081	4	0.0143986
541	EJK74290.1	1545	61684.7	TMVENLNR;GDILAITATDR	1;1	2	4	89592;140260;140264;140265	-	hypothetical protein THAOC_04038 [Thalassiosira oceanica]	0.893038	4	0.648535	0.869388	0.854359	4	0.0780922	0.349186	1.04737	3	0.787221	0.921238	0.832486	4	0.220378	0.579362	0.800355	4	0.0573943	0.244502	0.713378	4	0.0532947	0.197795	0.926553	4	0.242576	0.619407	0.915392	3	0.535946	0.797294	1.12526	4	0.475152	0.806414	0.869101	3	0.342866
542	EJK74859.1	1026	25703.1	AYLDQTVVPILLDGMSELVK	1	1	4	355821;355822;355823;356397	-	hypothetical protein THAOC_03437 [Thalassiosira oceanica]	2.0927	4	0.238876	0.546255	1.20086	3	0.209679	0.583089	1.53106	3	0.0694931	0.255945	1.42831	3	0.0529947	0.248689	1.77358	4	0.308669	0.659812	1.25734	3	0.170483	0.420204	0.959308	4	0.715528	0.908396	1.08941	4	0.423658	0.720158	0.577958	4	0.260874	0.618226	1.04248	4	0.754125
543	EJK75011.1	868	42785.4	SIPTFESTPR;ADTNAINITLNSFGTPLNEPAMR;DINELIAQCHPLGMFK	1;0;0	1	4	136689;136691;136695;136696;249194;353750;353751;353752;353754;354428;354430;354433;338489;338492;339611	-	hypothetical protein THAOC_03282 [Thalassiosira oceanica]	1.18044	15	0.125787	0.379982	0.966521	15	0.621438	0.859509	0.921717	11	0.0918908	0.312255	0.880885	14	0.0231977	0.140748	0.869924	14	0.00089991	0.0111837	0.695559	15	0.00029997	0.0038845	0.929109	13	0.133787	0.470146	0.781407	11	0.00039996	0.00461749	1.31427	15	0.00379962	0.04168	1.23206	15	0.0251975
544	EJK75977.1	968	19153.9	GEVVFNTGMVGYPEALTDPSYR	1	1	4	351097;351846;351847;361730	-	hypothetical protein THAOC_02284 [Thalassiosira oceanica]	0.903881	3	0.456454	0.757395	1.32906	4	0.0137986	0.115713	1.03191	4	0.825017	0.936858	1.35603	4	0.0140986	0.102442	1.40285	4	0.00419958	0.0355288	1.54044	4	0.0463954	0.176557	1.05609	4	0.393161	0.755158	1.15439	4	0.466653	0.751738	0.742517	4	0.221878	0.572891	0.964835	4	0.90131
545	EJK77855.1	557	111264	GIIAAIWGSDEIR;YGVELTFFHGK	1;0	1	4	214375;214380;214381;214392;259935;259947	-	hypothetical protein THAOC_00276 [Thalassiosira oceanica]	0.963821	6	0.767623	0.920943	1.19644	6	0.138386	0.482693	1.01122	6	0.928107	0.964488	1.27871	6	0.0524948	0.247456	0.884116	5	0.156784	0.448453	1.03417	6	0.70233	0.874074	1.02943	5	0.555844	0.845973	1.22402	6	0.0653935	0.232754	0.971652	6	0.760424	0.942616	0.770483	5	0.0180982
546	sp|A0T0X8.1|RK22_THAPS	631	13017.1	QVLDQIR;LVISEIFADEGPK	1;1	2	4	62195;282822;282823;282827	ABK20813.1;YP_874590.1	RecName: Full=50S ribosomal protein L22, chloroplastic	0.648562	4	0.00359964	0.0334358	0.862734	4	0.191381	0.564433	0.583598	4	0.00879912	0.0616435	0.780955	4	0.269773	0.632977	0.868882	4	0.346665	0.697803	0.274158	4	0.00019998	0.00281222	0.885456	4	0.374863	0.753835	0.347275	3	0.00019998	0.00262893	1.10833	4	0.427757	0.77864	1.10804	4	0.631637
547	XP_002286220.1	466	37269.5	GTIWDLDVCR;DHILLGGGQEAMSVTTTSGK	1;1	2	4	168271;168274;168279;346220	EED95861.1	predicted protein, partial [Thalassiosira pseudonana CCMP1335]	0.895557	4	0.285471	0.604488	0.918515	4	0.39816	0.718203	0.844737	4	0.19848	0.504634	0.865673	4	0.194481	0.537235	0.818741	4	0.316468	0.669338	0.644133	4	0.00739926	0.044544	1.02473	4	0.773123	0.941966	0.8138	4	0.0785921	0.267745	0.725212	4	0.107189	0.399241	0.651639	3	0.0236976
548	XP_002286266.1	76	52636.9	LNDLIEMK;MLDMGFEPQIR;SVCCYGGSPK	1;0;1	2	4	182815;198164;198167;198168;202223;202224;202225;202227;202229;202241;206287;218716;218717;218718	EED95907.1	predicted protein [Thalassiosira pseudonana CCMP1335]	0.808093	3	0.152485	0.428002	1.11446	4	0.322668	0.681155	0.966495	4	0.845115	0.939443	1.24304	4	0.0554945	0.255105	0.880108	4	0.156684	0.448453	0.866228	4	0.233377	0.502486	0.980074	4	0.816418	0.95942	0.967143	4	0.748325	0.907686	0.645937	4	0.00189981	0.0262904	0.576891	4	0.0009999
549	XP_002286395.1	621	60498.9	DLLPLVEGTTISTK	1	1	4	294005;294006;294015;294016	EED96036.1	heat shock protein HslVU, ATPase [Thalassiosira pseudonana CCMP1335]	0.836103	4	0.505349	0.795948	0.849051	4	0.531447	0.812271	0.703725	4	0.0274973	0.138719	0.634679	3	0.00709929	0.0615044	0.903065	4	0.214379	0.528468	0.671639	4	0.0113989	0.0608841	0.828961	4	0.0224978	0.164133	0.606872	4	0.00589941	0.0386358	1.0871	3	0.521048	0.8387	1.36005	4	0.0254975
550	XP_002286457.1	1107	46768.1	ELIAQGVSNLAAGAVGSAPVSGSMSR	1	1	4	117244;353133;353134;353138	EED96098.1	sulfate transporter, partial [Thalassiosira pseudonana CCMP1335]	0.724437	4	0.0189981	0.108681	1.37688	4	0.049895	0.271634	0.607925	4	0.0740926	0.267416	1.2871	4	0.0387961	0.200893	0.893793	4	0.447955	0.771206	1.06779	4	0.665533	0.854465	0.817799	4	0.0987901	0.403673	0.876015	4	0.517448	0.787098	1.26138	4	0.306069	0.679776	1.58338	4	0.0518948
551	XP_002286655.1	1233	8953.68	QAFNFEPENQVLAVK;KQAFNFEPENQVLAVK	1;1	2	4	325560;325562;325563;354269	EED96296.1	predicted protein, partial [Thalassiosira pseudonana CCMP1335]	1.0964	3	0.49525	0.784219	1.09838	4	0.217878	0.592182	0.948592	4	0.739326	0.908874	0.984141	3	0.90041	0.970516	0.926231	4	0.343866	0.697803	1.2524	4	0.0827917	0.261448	1.06936	4	0.514649	0.821911	1.46196	4	0.00769923	0.0474874	1.0063	4	0.949605	0.990535	0.864698	4	0.19988
552	XP_002287620.1	855	29947.4	LCYDMK;SNEMCSQYAPITWQVDR	1;1	2	4	136270;136281;136289;330019	EED95063.1;XP_002290131.1;EED91883.1;BAO52718.1	predicted protein [Thalassiosira pseudonana CCMP1335]	3.8184	3	0.0001	0.00219734	1.40683	4	0.00269973	0.0377125	2.22614	4	0.00259974	0.0253088	1.00475	4	0.959504	0.987965	3.3851	4	0.0484952	0.220122	1.94747	4	0.0917908	0.280515	1.95841	4	0.122588	0.45547	1.19786	4	0.492651	0.769172	2.17205	4	0.0001	0.0035271	3.52553	4	0.0130987
553	XP_002287721.1	111	11602.7	EFLVDQEICHSDAIVLHGF	1	1	4	210535;341252;341256;341281	EED95164.1	translation initiation factor sui1-like protein, partial [Thalassiosira pseudonana CCMP1335]	1.16737	4	0.433857	0.736861	1.01668	4	0.823618	0.934836	1.17792	4	0.217078	0.524072	1.03619	4	0.712929	0.904717	1.14236	4	0.121688	0.381359	1.62258	4	0.0657934	0.225149	1.04612	4	0.566343	0.850459	1.48894	4	0.0226977	0.110782	0.731386	4	0.0476952	0.241022	0.775808	4	0.0514949
554	XP_002288023.1	1378	21069.7	QTAELQHGR;RQTAELQHGR;LAELKHGR	1;1;1	3	4	13752;107973;156047;166364	EED95466.1;EJK69096.1	fucoxanthin-chlorophyll a-c binding protein, plastid precursor [Thalassiosira pseudonana CCMP1335]	0.705713	4	0.00969903	0.064732	0.87601	4	0.109589	0.428372	0.806366	4	0.19918	0.504634	0.998203	4	0.987201	0.998281	1.12617	4	0.157284	0.44917	1.12456	4	0.689031	0.869745	1.20178	4	0.147785	0.487512	1.32655	3	0.490051	0.766952	0.785669	4	0.0392961	0.216078	0.594909	4	0.0248975
555	XP_002289702.1	804	94096.9	IDQLVELIK;LPQMIEYTSEPLR	1;1	2	4	208100;254946;257959;257970	EED93239.1	beta subunit of clathrin adaptor complex AP2 [Thalassiosira pseudonana CCMP1335]	0.688886	4	0.00739926	0.0518812	1.08033	4	0.622738	0.859509	0.732469	4	0.222378	0.52862	1.16011	4	0.139586	0.44006	0.892858	4	0.39536	0.732186	1.10443	3	0.510849	0.758687	1.01572	4	0.906809	0.981267	1.11064	4	0.583542	0.826184	1.03141	4	0.870013	0.971876	0.903451	4	0.626337
556	XP_002290606.1	598	49388.2	QTLLELVDYVNTPAGQK;LQLCGVIFSFDDPTSDK	1;1	2	4	338753;338756;338757;342445	EED92358.1;EJK67089.1	hypothetical protein THAPSDRAFT_34227, partial [Thalassiosira pseudonana CCMP1335]	0.714248	4	0.0791921	0.284064	1.05901	4	0.560644	0.829191	0.721423	4	0.0358964	0.167053	1.10075	4	0.645535	0.889537	0.837362	4	0.243576	0.578292	0.790354	4	0.0727927	0.240416	0.895594	4	0.466553	0.80909	0.843914	4	0.128187	0.369976	0.90828	4	0.327867	0.702203	0.857426	4	0.177782
557	XP_002291118.1	1449	80628.8	SVETSPFLEK;APFDMFEGGAK;DSSQSAYMSSK;ADLVNNLGTIAK;RAPFDMFEGGAK;QPGIYYITGESK;SGDSMTSLDDYVSR;LADSPCCLVTGEYGWSANMER;MDDKQPGIYYITGESK	0;0;0;0;0;0;1;0;0	1	4	224209;224214;224216;231904;236773;236774;245702;245708;245709;245710;245711;245716;245717;245718;245719;245720;245721;265423;265424;268538;268546;268565;271238;301412;301414;301418;301419;351733;351734;351735;351736;352468;352469;353487;353490;353491;353492	EED91225.1	HSP90 family member [Thalassiosira pseudonana CCMP1335]	0.704405	4	0.0156984	0.0942952	0.876636	4	0.10199	0.410638	0.594047	4	0.00509949	0.0413702	0.746157	4	0.0164983	0.113908	0.630047	4	0.00059994	0.00864873	0.478946	4	0.00479952	0.0328484	0.712877	4	0.00079992	0.015668	0.533697	4	0.00289971	0.0240663	0.977723	4	0.815418	0.95334	0.885113	4	0.269473
558	XP_002291125.1	218	70461.6	GSSAVGLTASVVR;TYVDAIHFR;IAEPTQCPTCHVR	1;1;1	3	4	28076;132658;132659;253199	EED91232.1	cdc21-like protein [Thalassiosira pseudonana CCMP1335]	0.711874	4	0.0888911	0.304528	0.82454	4	0.0336966	0.210627	0.868091	4	0.378262	0.695153	0.950312	4	0.59914	0.869984	0.943067	4	0.462354	0.781462	0.564995	3	0.00939906	0.0525413	1.07484	4	0.458754	0.803377	0.807413	4	0.29517	0.598651	0.965933	4	0.845415	0.962403	0.865411	4	0.370363
559	XP_002291391.1	1614	38506	AVGVLLGSSSR;DINDPTVSTVANLVK	1;0	1	4	14146;109897;109899;109900;308495	EED91498.1	26S proteasome regulatory subunit 8 [Thalassiosira pseudonana CCMP1335]	1.31655	4	0.110689	0.34932	1.06083	3	0.550045	0.826673	1.04654	4	0.89881	0.956253	0.850619	4	0.477852	0.798785	0.829338	4	0.177682	0.476843	0.82671	4	0.125787	0.348334	0.932912	4	0.775322	0.942191	0.950919	4	0.725527	0.901278	1.1853	3	0.220978	0.572891	1.12028	4	0.321368
560	XP_002292078.1	1411	67396	SLDQLVSYGER	1	1	4	178539;178540;178549;178554	EED90929.1	predicted protein [Thalassiosira pseudonana CCMP1335]	1.09717	3	0.492051	0.782799	1.11409	4	0.290271	0.663792	0.733195	4	0.134387	0.400645	0.824254	4	0.127087	0.414876	0.882952	4	0.19868	0.51073	0.822794	4	0.118388	0.33401	0.993153	4	0.960604	0.98946	0.935332	4	0.529947	0.791853	1.48469	4	0.00719928	0.0650829	1.30783	3	0.106789
561	XP_002292528.1	1431	22558.9	FLDLSVGSR;SFLENPLISR;YANATYIAASK	0;1;1	2	4	94777;94778;149801;149809;232692;232700	EED90503.1	synthase of ATP synthase [Thalassiosira pseudonana CCMP1335]	0.877816	4	0.405759	0.716842	0.743845	4	0.0223978	0.156437	0.616564	4	0.0873913	0.301517	0.52446	4	0.0105989	0.0816209	0.881357	3	0.265773	0.613219	0.70911	4	0.019598	0.0966479	1.12951	4	0.456054	0.800204	0.854451	4	0.313369	0.620194	1.29604	3	0.0943906	0.364782	1.28369	4	0.338066
562	XP_002292529.1	1297	38440.8	IADFGFAK;TLGEGAFSVVIEATK	1;1	2	4	148935;299804;299806;299807	EED90504.1	myosin light chain kinase [Thalassiosira pseudonana CCMP1335]	1.15425	4	0.191681	0.477084	1.09906	4	0.216078	0.589067	1.07496	4	0.667633	0.88153	1.08295	3	0.539246	0.837691	0.720068	3	0.0206979	0.11441	0.682288	4	0.0128987	0.06769	0.86068	4	0.108289	0.426996	0.714348	4	0.134087	0.380899	1.1001	4	0.649635	0.908076	1.05444	4	0.633837
563	XP_002292986.1	27	36446.3	IADLPDNSVIGTASLR;GSPLALAQAYETR;QAQILAQNPTLK	1;0;1	2	4	23470;267823;267827;208437;208438;208439;265330	EED89447.1	porphobilinogen deaminase [Thalassiosira pseudonana CCMP1335]	0.943857	4	0.556644	0.825575	0.885146	4	0.122388	0.449723	0.9337	4	0.652935	0.876256	0.874604	4	0.213079	0.567161	1.67768	3	0.00139986	0.0154758	1.40197	3	0.069793	0.233943	1.19801	4	0.0329967	0.207902	0.961954	4	0.712029	0.89676	0.938955	4	0.629537	0.90012	1.15483	4	0.254675
564	XP_002293297.1	1349	37501.9	ALLVGTNEGVGLSR	1	1	4	210794;210802;210803;210804	EED89033.1	predicted protein [Thalassiosira pseudonana CCMP1335]	1.22669	4	0.213179	0.509283	1.21826	4	0.326767	0.684106	1.29099	3	0.162084	0.451179	1.0089	3	0.944406	0.981499	0.953549	4	0.832217	0.934947	0.851234	4	0.339466	0.621606	1.03713	4	0.742526	0.923417	0.928275	4	0.488551	0.766952	0.990135	3	0.941906	0.990535	1.05947	4	0.590741
565	XP_002293649.1	1639	80792.2	FLTDGMLLR;SISSAESVK;QMAELPLDPQLSK	1;1;1	3	4	115592;115593;161188;291182	EED89385.1	RNA helicase [Thalassiosira pseudonana CCMP1335]	0.853341	4	0.251975	0.558498	1.09002	4	0.430357	0.738575	0.508648	3	0.00749925	0.0551271	0.747577	4	0.240276	0.601357	0.848433	4	0.0744926	0.291183	0.959533	4	0.781222	0.921023	0.969053	4	0.688031	0.892355	1.08857	4	0.544646	0.804022	1.15623	4	0.214779	0.564068	1.18444	3	0.265773
566	XP_002293672.1	682	73468.8	GDIVGAAEAEGIFIR;RGDIVGAAEAEGIFIR	1;1	2	4	242165;273947;273968;273969	EED88681.1	predicted protein [Thalassiosira pseudonana CCMP1335]	0.807351	4	0.430857	0.736861	0.898646	4	0.451055	0.753792	0.844357	4	0.568643	0.832623	0.935476	4	0.486751	0.805033	1.10898	4	0.446055	0.769916	0.758401	4	0.0432957	0.169441	1.31078	3	0.0167983	0.133556	0.760216	3	0.0846915	0.28194	0.999463	4	0.9977	0.998255	0.891865	4	0.446755
567	XP_002293898.1	1261	24648.7	GSSNSYAIK;QAVDMSPFR;DISLVDYIACK	0;0;1	1	4	30953;30963;167107;167125;246090;111056;111065;115766;115769;115770;115772;115776;259697;259702;259710;259714	EED88907.1	RS5, ribosomal protein 5 [Thalassiosira pseudonana CCMP1335]	0.433751	4	0.00069993	0.0095551	0.814037	4	0.0771923	0.347751	0.366755	4	0.0170983	0.099657	0.694502	4	0.020198	0.12861	0.442811	3	0.00019998	0.00371509	0.331368	4	0.00839916	0.0483019	0.628825	4	0.0150985	0.123926	0.376974	4	0.00159984	0.0150854	0.889715	4	0.338966	0.709709	0.791921	4	0.089891
568	XP_002294116.1	1013	76813.7	GNEATIAWLR;DNVHFVLDLYDPFGFNK	1;1	2	4	135421;135423;135424;348322	EED88471.1	predicted protein [Thalassiosira pseudonana CCMP1335]	0.668579	4	0.00539946	0.0424883	0.697004	4	0.00709929	0.0743774	0.367094	4	0.0059994	0.0467745	0.307069	3	0.0001	0.00261133	1.07955	4	0.538646	0.830822	0.365729	4	0.0001	0.0016362	1.10679	4	0.319368	0.706137	0.387309	4	0.0001	0.00166743	2.50544	4	0.00069993	0.012225	2.43404	4	0.00069993
569	XP_002294392.1	1014	13778.8	ESILELAK	1	1	4	159713;159715;159716;159718	EED88226.1	predicted protein [Thalassiosira pseudonana CCMP1335]	1.00277	3	0.983302	0.993223	0.99799	4	0.984202	0.995041	0.711364	3	0.079992	0.283037	0.827842	4	0.228877	0.589756	0.974331	4	0.743626	0.920683	0.906769	4	0.381262	0.661785	1.07941	4	0.241776	0.619407	1.01624	4	0.874113	0.961647	0.892292	3	0.391561	0.755466	0.86609	4	0.20278
570	XP_002294484.1	1030	10362.3	GDIVVLVSPPLR	1	1	4	178029;178030;178031;178032	EED88318.1	predicted protein, partial [Thalassiosira pseudonana CCMP1335]	0.76002	3	0.0828917	0.29174	0.766847	3	0.0344966	0.213618	0.807404	4	0.29687	0.618823	0.805378	4	0.160384	0.478999	0.794034	4	0.0789921	0.300303	0.819769	3	0.219078	0.482889	0.951518	3	0.562444	0.848847	0.94873	4	0.617438	0.843981	1.32019	3	0.0713929	0.314024	0.940095	4	0.772023
571	XP_002294653.1	899	30003	FGFDQATGWNR;GYWHLGEEGTVLDVMR	1;1	2	4	188321;188322;305068;336826	EED88013.1	mitochondrial alternative oxidase [Thalassiosira pseudonana CCMP1335]	0.81382	4	0.218378	0.51373	0.9304	4	0.459554	0.761837	0.623067	4	0.0260974	0.133907	0.666928	3	0.0126987	0.0941692	0.715631	4	0.039496	0.190809	0.405779	3	0.00029997	0.0038845	0.890565	4	0.321568	0.707104	0.491093	3	0.00149985	0.0142922	1.29706	4	0.0787921	0.335099	1.2097	3	0.221678
572	XP_002295558.1	78	52618.7	DSALIHVLNR;AFSPTTINTGR;IIEVNYNVK	1;1;1	3	4	137739;146261;213291;213301	ACI64275.1;EJK49661.1	protein translocase complex subunit [Thalassiosira pseudonana CCMP1335]	0.541866	4	0.00179982	0.0197761	0.711586	3	0.0109989	0.100609	0.402118	3	0.00059994	0.00806337	0.619057	4	0.0176982	0.118558	0.465339	4	0.0452955	0.208753	0.562359	4	0.0456954	0.175377	0.572917	4	0.00979902	0.0944269	0.668674	4	0.029697	0.134046	1.18606	4	0.371163	0.739449	1.02843	4	0.791921
573	XP_002295758.1	1678	58920.4	DGSGVPEILVR;DLYVSYVDEDILVVR	1;1	2	4	139085;139089;331588;331590	ACI64475.1	predicted protein [Thalassiosira pseudonana CCMP1335]	0.954206	4	0.629037	0.861996	0.909585	4	0.214879	0.587574	1.02191	3	0.89691	0.955255	0.94214	4	0.535746	0.837691	0.818198	4	0.19588	0.50788	0.747256	4	0.222878	0.486279	0.801674	4	0.0515948	0.280888	0.605933	3	0.00979902	0.0576733	1.38068	4	0.194381	0.535789	1.4362	4	0.146785
574	XP_002295769.1	604	81303	GYDQVVHDVAIQNLPVR	1	1	4	312538;312540;312541;341164	ACI64486.1;EJK67229.1	predicted protein [Thalassiosira pseudonana CCMP1335]	1.26894	4	0.0438956	0.19775	1.08008	3	0.435356	0.742909	1.46129	4	0.0224978	0.122044	1.39844	4	0.00809919	0.0666427	1.17419	4	0.392061	0.726845	0.912543	4	0.612039	0.822813	1.03766	4	0.809119	0.958842	0.80689	4	0.129087	0.371958	0.860686	4	0.151385	0.477585	0.965638	4	0.742326
575	XP_002296064.1	1529	76237.1	SLIDSYFSIVR;ALEIVNEVR	1;1	2	4	39720;188735;188752;109035	ACI64781.1	dynamin GTPase, switch/motor protein [Thalassiosira pseudonana CCMP1335]	0.700325	4	0.0230977	0.124411	0.783935	4	0.0329967	0.207902	0.686116	4	0.0446955	0.192546	0.749509	4	0.0174982	0.118558	1.04078	3	0.717328	0.914809	0.860261	3	0.331967	0.614154	1.05947	4	0.628837	0.877742	0.780584	4	0.335066	0.645374	1.24387	4	0.0888911	0.353028	1.11593	4	0.319368
576	XP_002296642.1	1070	52970.8	DIILAPGSIPFVPPGVTVDEK	1	1	4	354108;354109;354111;354112	EED87037.1	hypothetical protein THAPSDRAFT_24399 [Thalassiosira pseudonana CCMP1335]	1.76688	4	0.00059994	0.00858009	1.04126	4	0.679032	0.885656	1.69303	4	0.0049995	0.0407425	1.00029	4	0.9963	0.9995	1.17138	4	0.164684	0.461855	1.24805	4	0.0863914	0.270914	0.897704	4	0.19698	0.569757	0.78527	3	0.119188	0.351911	1.4315	3	0.0276972	0.170059	1.75993	4	0.00269973
577	XP_002297607.1	633	47270	SVYAAIPGR;AVDHLCFSR;INEEVFIAMAK	1;1;1	3	4	77762;127171;253356;253363	EED86098.1;EED91739.1;XP_002291632.1;EJK73821.1	predicted protein, partial [Thalassiosira pseudonana CCMP1335]	0.989282	4	0.905809	0.979399	1.05691	4	0.542946	0.820947	0.819407	3	0.249975	0.562953	1.05129	3	0.70373	0.903334	1.01142	4	0.888411	0.962727	0.989847	4	0.929707	0.972384	0.806828	4	0.124488	0.458177	0.775816	4	0.10189	0.318583	0.893732	4	0.438456	0.78215	1.12256	4	0.59814
578	YP_009093166.1	122	86059.5	FATSDLNELYR;LLEIDAPQLIIR;LGIQAFEPIIVQGR	1;1;1	3	4	196085;212792;247402;247407	YP_009093439.1;AIR76112.1;AIR75839.1	RNA polymerase beta (chloroplast) [Roundia cardiophora]	0.442025	4	0.00119988	0.0143191	0.778638	4	0.0825917	0.36388	0.409497	4	0.00049995	0.00714611	0.709548	4	0.00769923	0.0648318	0.712227	4	0.00759924	0.0563532	0.552703	4	0.00689931	0.0419553	0.967575	3	0.70053	0.901552	0.829791	4	0.229677	0.513211	0.901847	4	0.39576	0.75581	0.553695	3	0.00489951
579	YP_009093250.1	248	35312.9	DEFSLIPGVR;AQINTIGDLLEYSPEK;SADEVFATLK;EDILEILLNLK;KSADEVFATLK	0;1;0;0;0	1	4	136035;187615;331007;331011;331012;210471;262967;298274	AIR75923.1	RNA polymerase alpha subunit (chloroplast) [Roundia cardiophora]	0.711687	4	0.0115988	0.0746468	0.880244	4	0.231877	0.605568	0.681408	4	0.040296	0.179193	0.732617	3	0.0675932	0.288633	0.974873	4	0.821118	0.93268	0.805289	3	0.188981	0.446063	1.02959	3	0.764124	0.935993	0.837124	4	0.148685	0.401472	0.635589	4	0.0178982	0.126767	0.658599	4	0.0551945
580	ABK20845.1	203	57192.7	QSIIEAMYHAFYEK;NPVQALELVER;IHIQEFRPNR;GLLLVGIQGTGK;LTAQTPALFLLK	0;1;1;0;1	3	3	60686;179085;191308;228657;263562	YP_874572.1;YP_874622.1;ABK20795.1	conserved hypothetical protein (chloroplast) [Thalassiosira pseudonana]	0.991894	3	0.975802	0.989431	1.14932	3	0.620638	0.859509	1.04933	3	0.819918	0.935195	1.24445	3	0.390261	0.734603	0.872797	3	0.450655	0.771206	0.82097	3	0.220378	0.483976	1.08542	3	0.661134	0.887638	1.05369	3	0.794421	0.925072	1.51821	3	0.223778	0.575108	1.2348	3	0.530547
581	ACI64227.1	1167	18416.1	IVMGLYGDVVPK	1	1	3	261830;261833;261835	XP_002295510.1	predicted protein [Thalassiosira pseudonana CCMP1335]	0.820761	3	0.378962	0.702561	1.09425	3	0.640636	0.870608	0.926332	3	0.649035	0.875029	1.24868	3	0.112989	0.38782	1.03953	3	0.725227	0.918486	0.87884	3	0.475952	0.736627	0.901963	3	0.246675	0.622195	0.760049	3	0.0844916	0.281795	0.971739	3	0.926407	0.985949	1.11829	3	0.610939
582	ACI64369.1	505	32924.8	QQEIILWR;ELLPPGSLYDTR	1;1	2	3	121669;204407;204408	XP_002295652.1	predicted protein, partial [Thalassiosira pseudonana CCMP1335]	1.24705	3	0.141886	0.409741	1.10952	3	0.307669	0.676122	0.938687	3	0.712229	0.895383	0.862059	3	0.253175	0.612426	0.804489	3	0.0848915	0.310924	0.956138	3	0.765423	0.912774	1.02939	3	0.735626	0.92093	1.24286	3	0.152385	0.40625	1.38398	3	0.0413959	0.222302	1.10055	3	0.505549
583	ACI64410.1	1374	139562	GTLDLLGLHR;SVYDDLALTGSSIGWR	1;1	2	3	124295;124296;285667	XP_002295693.1;EJK47043.1	predicted protein [Thalassiosira pseudonana CCMP1335]	1.1293	3	0.376662	0.70046	1.10123	3	0.375762	0.704603	0.937612	3	0.732527	0.905344	0.932491	3	0.723128	0.905414	1.03622	3	0.759624	0.921723	0.802841	3	0.185081	0.440088	1.23253	3	0.109189	0.429061	0.994864	3	0.970903	0.988873	1.19119	3	0.211379	0.558373	0.97852	3	0.877512
584	ACI64480.1	1389	62215.5	IPDCIHLIEAGK	1	1	3	273135;273136;273138	XP_002295763.1	predicted protein [Thalassiosira pseudonana CCMP1335]	1.25478	3	0.151485	0.427862	1.36492	3	0.138486	0.482693	1.53736	3	0.0417958	0.184496	1.71457	3	0.00289971	0.0318614	0.803786	3	0.0839916	0.310089	0.914604	3	0.554545	0.784733	1.13206	3	0.178882	0.53457	1.31339	3	0.0858914	0.283316	0.959863	3	0.833417	0.960485	0.67823	3	0.0631937
585	ACI64872.1	181	21446.6	MSVCAISFTENAR	1	1	3	234671;234673;238294	XP_002296155.1	RL18, ribosomal protein 18, 60S large ribosomal subunit [Thalassiosira pseudonana CCMP1335]	0.658091	3	0.314769	0.63305	0.886555	3	0.342566	0.687641	0.41056	3	0.118388	0.372757	0.555253	3	0.0234976	0.141615	0.747169	3	0.152385	0.439356	0.505648	3	0.0907909	0.278544	0.775275	3	0.0620938	0.309953	0.52011	3	0.0514949	0.198591	0.937024	3	0.890911	0.978479	0.908188	3	0.846815
586	ACI65016.1	1033	101005	GAAAGPELSAAGMFADLLR	1	1	3	298346;298347;298348	XP_002296299.1	bifunctional aspartokinase/homoserine dehydrogenase [Thalassiosira pseudonana CCMP1335]	0.97633	3	0.858614	0.961605	1.04656	3	0.651635	0.876859	0.954699	3	0.856614	0.942407	1.05927	3	0.705829	0.903334	0.959404	3	0.867213	0.953866	1.02582	3	0.921408	0.971483	0.785045	3	0.309769	0.696015	0.750524	3	0.105889	0.325191	1.02403	3	0.90241	0.979117	1.31923	3	0.120288
587	ADB27480.1	642	70109.8	GVIVVGATNR;QVTVNLPDR;VDILDAALLRPGR;GILLVGPPGTGK;NEAQLNQNVVSSR;AEFEEIVSFLK;VEIPVGASQLIQK;ELLSTYTILPNK;NAIVQASSPELGNRPQTIR;EQTLNQLLTEMDGFK;AEFEEIVSFLKEPEK;LKEYNIDFDAHPAEQK;EQTLNQLLTEMDGFKENK	0;0;0;0;1;0;0;0;0;0;0;0;0	1	3	92442;92444;92445;92446;108646;108647;108652;108653;108675;216402;216403;216404;216405;216406;216407;216408;216409;216410;216411;216412;217519;217520;217523;217524;217525;217526;217527;228299;228308;228317;262732;262733;262734;262736;262740;276160;276161;276162;276163;276164;276165;276166;276167;276170;278146;278161;278163;278164;321484;326787;326788;326789;326792;326793;328710;328713;330215;3511…	YP_004072526.1	metallo-endopeptidase FtsH (chloroplast) [Thalassiosira oceanica CCMP1005]	0.759738	8	0.20208	0.490765	0.924517	8	0.516048	0.800843	0.528458	8	0.0546945	0.224385	0.649819	8	0.0650935	0.279903	0.691022	8	0.00389961	0.0339473	0.548517	8	0.00189981	0.0162069	0.855806	8	0.0753925	0.346151	0.679446	8	0.00569943	0.038301	1.02665	7	0.623038	0.895959	0.871772	8	0.0362964
588	ADB27506.1	707	20536.1	ISEGLNPQR;EILLTYPLNNIQSIGIK	1;1	2	3	100308;341591;341592	EJK52347.1;EJK55851.1;YP_004072552.1	photosystem I assembly protein Ycf4 (chloroplast) [Thalassiosira oceanica CCMP1005]	0.682638	3	0.0287971	0.143349	0.867594	3	0.180282	0.547523	0.619657	3	0.060094	0.236308	0.78984	3	0.269273	0.632977	0.685155	3	0.080292	0.302059	0.54142	3	0.0139986	0.0724066	0.656691	3	0.121888	0.453805	0.480757	3	0.0256974	0.120211	1.11723	3	0.521748	0.8387	1.2573	3	0.434157
589	AIR75575.1	143	3339.78	LGATLYQ	1	1	3	39746;39747;39750	ADB27482.1;AIR75434.1;ABK20756.1;AIR75850.1;YP_004072528.1;YP_874533.1;sp|A0T0S1.1|PSAM_THAPS;YP_009093177.1	photosystem I protein M (chloroplast) [Cyclotella sp. WC03_2]	0.825048	3	0.183482	0.465386	1.11435	3	0.361664	0.694276	0.52765	3	0.00769923	0.055688	0.724638	3	0.0714929	0.298089	0.9755	3	0.878512	0.960064	0.638283	3	0.0281972	0.123491	0.909715	3	0.508849	0.82179	0.595536	3	0.0125987	0.0700319	1.44552	3	0.0246975	0.157556	1.54697	3	0.0217978
590	AIR75840.1	493	160156	VNESGFLETPFWR;ILPFDEMYGSEVSR;LVYEDIFTSIHIER	1;1;1	3	3	255734;267901;285004	YP_009093167.1	RNA polymerase beta subunit (chloroplast) [Roundia cardiophora]	0.98564	3	0.913609	0.979399	1.12873	3	0.240976	0.616452	0.909588	3	0.577942	0.837389	1.07466	3	0.580442	0.862868	0.862226	3	0.465753	0.782918	0.898045	3	0.555844	0.785799	0.798526	3	0.141986	0.480035	0.797976	3	0.141386	0.392105	1.12267	3	0.385461	0.751295	1.25477	3	0.159184
591	ANG60897.1	733	60642.4	LTQFTGSSR;YLQFGEISR;SLDDLSVAPVLTHTTK	0;1;1	2	3	95570;129918;321588;321592	-	aldehyde dehydrogenase protein [Skeletonema marinoi]	0.940746	3	0.650135	0.869388	0.786625	3	0.20378	0.576469	1.28975	3	0.319568	0.648133	1.06523	3	0.739426	0.912248	1.58631	3	0.174883	0.475322	1.57182	3	0.0275972	0.122352	1.11119	3	0.350965	0.729446	1.10496	3	0.60244	0.833329	0.651789	3	0.229377	0.57794	0.903991	3	0.626937
592	AOE43471.1	174	22253.6	VILPTNTHLR	1	1	3	146019;146023;146026	AOE43477.1;AOE43489.1;AOE43497.1;AOE43503.1;AOE43488.1;AOE43490.1;AOE43478.1;AOE43479.1;AOE43499.1;AOE43508.1;AOE43476.1;AOE43470.1;AOE43491.1;AOE43494.1;AOE43495.1;AOE43492.1;AOE43485.1;AOE43487.1;AOE43484.1;AOE43483.1;AOE43482.1;AOE43472.1;AOE43501.1;AOE43481.1;AOE43473.1;AOE43507.1;AOE43502.1;AOE43493.1;AOE43500.1;AOE43475.1;AOE43480.1;AOE43474.1;AOE43486.1;AOE43498.1;AOE43505.1;AOE43504.1;AOE…	cytochrome c oxidase subunit II, partial (mitochondrion) [Thalassiosira rotula]	0.823031	3	0.180082	0.461604	0.670699	3	0.00449955	0.0551577	0.702245	3	0.0734927	0.266681	0.564655	3	0.0019998	0.0243489	0.751285	3	0.0338966	0.167807	0.623808	3	0.0225977	0.105378	1.2435	3	0.172883	0.53237	1.08795	3	0.574443	0.821088	1.45537	3	0.0225977	0.148913	0.878601	3	0.560644
593	CAI44219.1	919	3421.61	SIPFLTVPEK	1	1	3	222769;222770;222771	CAA06733.1;XP_002290650.1;EED92402.1	fucoxanthin chlorophyll a/c binding protein, partial [Cyclotella cryptica]	0.268707	3	0.0001	0.00219734	0.599702	3	0.00149985	0.0264973	0.185815	3	0.0001	0.00211861	0.415905	3	0.00059994	0.010199	0.668308	3	0.0079992	0.0581232	0.32395	3	0.0001	0.0016362	0.578848	3	0.00689931	0.072705	0.275516	3	0.00019998	0.00262893	1.08506	3	0.530247	0.843246	1.27172	3	0.139586
594	EED86328.1	431	61102.8	LHPPDDGFR;TLLVGMGSTLFR;GSCVFAQTSVMR;SHFLPIFEEAK	1;1;0;1	3	3	111930;191564;203829;263877	XP_002297365.1	hypothetical protein THAPSDRAFT_bd1658 [Thalassiosira pseudonana CCMP1335]	1.0399	3	0.763824	0.918219	0.936397	3	0.507049	0.797994	1.15308	3	0.649635	0.875029	1.0314	3	0.89911	0.970516	1.53045	3	0.0572943	0.244502	0.927256	3	0.615038	0.82398	1.25545	3	0.0671933	0.326367	0.801308	3	0.145985	0.398363	0.896618	3	0.755724	0.942616	1.02789	3	0.885811
595	EED86636.1	561	31338.8	QMLALHLR;IRPEVFDK	1;1	2	3	91316;91325;190912	XP_002296908.1	predicted protein, partial [Thalassiosira pseudonana CCMP1335]	1.077	3	0.726627	0.901779	0.778451	3	0.0420958	0.24313	1.23584	3	0.223478	0.528887	0.883605	3	0.510849	0.822976	0.92718	3	0.590141	0.860144	0.81681	3	0.30027	0.580543	1.15847	3	0.125387	0.458678	1.03961	3	0.792321	0.924786	0.966388	3	0.909509	0.981636	0.766945	3	0.338166
596	EED86648.1	616	46209.6	GDLGVEIPFR;VICTLGPSTDSK;GVNLPNTAIDLPALTEK	0;1;1	2	3	126736;126737;255868;328679;328680	XP_002296920.1	pyruvate kinase, partial [Thalassiosira pseudonana CCMP1335]	1.04151	3	0.883512	0.972895	1.00295	3	0.975802	0.992883	0.958222	3	0.813019	0.932048	0.931207	3	0.583942	0.862868	0.946599	3	0.765623	0.921723	1.12026	3	0.456454	0.722619	0.898465	3	0.423258	0.775295	1.05004	3	0.734427	0.906581	1.30309	3	0.291371	0.661004	1.39042	3	0.181982
597	EED86805.1	889	61304	AIVGAAFGAAGQR;APSASLLLTK	1;1	2	3	26598;153823;190116	XP_002297077.1	hypothetical protein THAPSDRAFT_25495 [Thalassiosira pseudonana CCMP1335]	0.982642	3	0.89621	0.974962	0.776955	3	0.0794921	0.353691	1.06961	3	0.692131	0.892178	0.832524	3	0.170083	0.492748	1.0659	3	0.785621	0.924723	1.00329	3	0.982402	0.991766	1.44933	3	0.0255974	0.175386	1.44897	3	0.069893	0.246818	1.26565	3	0.109589	0.403907	0.904807	3	0.488151
598	EED87429.1	897	164019	STLLDPIPDVR;GLEPLLPIYQR	1;1	2	3	165622;188526;188531	XP_002295125.1	hypothetical protein THAPSDRAFT_270116 [Thalassiosira pseudonana CCMP1335]	0.532351	3	0.0226977	0.123943	0.935094	3	0.60464	0.858638	0.512482	3	0.0346965	0.163582	0.908002	3	0.459554	0.789606	0.791184	3	0.322368	0.677047	0.656309	3	0.0343966	0.142659	0.886938	3	0.550045	0.844412	0.738421	3	0.0644936	0.231842	0.938691	3	0.620038	0.893789	0.842849	3	0.260874
599	EED87535.1	489	56684	VMAFPTLR;VPGNFHIEAK	1;1	2	3	8094;82534;218200	XP_002295231.1;EJK74922.1	predicted protein [Thalassiosira pseudonana CCMP1335]	0.47416	3	0.00109989	0.013302	0.672048	3	0.129387	0.466311	0.440856	3	0.0173983	0.100753	0.622775	3	0.0181982	0.121008	0.727343	3	0.0458954	0.210978	0.541842	3	0.0266973	0.119838	0.961864	3	0.648035	0.886009	0.720429	3	0.049995	0.194894	1.17226	3	0.476852	0.807015	0.900278	3	0.759624
600	EED87568.1	550	16859.4	AVSSALPMLSINPTSGVTLENAGDYLR	1	1	3	287368;363136;363137	XP_002295264.1	predicted protein, partial [Thalassiosira pseudonana CCMP1335]	1.61797	3	0.130887	0.387925	0.977523	3	0.821518	0.933402	1.18562	3	0.335366	0.664461	0.733484	3	0.122088	0.405161	1.37998	3	0.30467	0.655931	1.31338	3	0.333967	0.615922	1.06832	3	0.727627	0.914993	1.04265	3	0.822818	0.940886	1.6882	3	0.0815918	0.341357	2.09857	3	0.0124987
601	EED87657.1	1423	26061.2	YQEDMELEDAIHTALLTLR;LFQVDPSGAYFGWK;RYQEDMELEDAIHTALLTLR	1;1;1	3	3	218489;312031;352521	XP_002294877.1	proteasome subunit alpha type 2 [Thalassiosira pseudonana CCMP1335]	1.34034	3	0.0706929	0.266503	1.18516	3	0.351265	0.689554	1.18913	3	0.473253	0.765106	1.09673	3	0.49525	0.8109	0.901623	3	0.348965	0.698706	1.00202	3	0.993801	0.994906	1.164	3	0.207879	0.57829	1.41144	3	0.192781	0.466489	1.13826	3	0.618238	0.893789	0.877952	3	0.682932
602	EED87901.1	1125	58110.1	IALTPVALMEGHR;VVGCHVATDGAGEMVQGVAIAIK	1;1	2	3	216141;216150;358545	XP_002294541.1	glutathione reductase, gro-2 [Thalassiosira pseudonana CCMP1335]	1.66062	3	0.0114988	0.0742686	0.857496	3	0.152385	0.512645	2.08231	3	0.00409959	0.0351589	1.06336	3	0.635336	0.886696	1.68341	3	0.00869913	0.0614739	1.48197	3	0.0426957	0.168906	1.42258	3	0.0889911	0.380907	1.30995	3	0.150785	0.404113	0.716334	3	0.0372963	0.209675	0.799291	3	0.222478
603	EED88210.1	1162	79501.4	MAPDVESVANLSNLILEK;EVETLFHEFGHGLQHMLTR	1;1	2	3	342532;343496;344600	XP_002294376.1	oligopeptidase [Thalassiosira pseudonana CCMP1335]	1.07346	3	0.60204	0.849449	0.85391	3	0.261674	0.638561	1.27405	3	0.311069	0.636631	1.0078	3	0.951005	0.983864	1.34397	3	0.233177	0.559235	1.0479	3	0.80262	0.927271	1.08144	3	0.766923	0.936922	0.861049	3	0.354165	0.659929	0.934271	3	0.860014	0.969539	1.13272	3	0.70163
604	EED88710.1	245	15329.5	EIAQDFKTDLR	1	1	3	267441;267453;267456	XP_002293701.1;EJK48130.1	histone H3 [Thalassiosira pseudonana CCMP1335]	0.348365	3	0.00079992	0.0106775	0.444192	3	0.00189981	0.0316987	0.410908	3	0.00059994	0.00806337	0.521223	3	0.0009999	0.0146489	1.01847	3	0.917508	0.975015	0.443832	3	0.112789	0.322766	1.0578	3	0.827617	0.960313	0.463668	3	0.19858	0.471824	0.519457	3	0.111989	0.40783	0.494276	3	0.154285
605	EED88813.1	1075	65451.9	APTGAEVEWVK;KNEVVSFVK;KEDSYFFK	1;1;1	3	3	235965;270926;273583	XP_002293804.1	methionyl-trna synthetase [Thalassiosira pseudonana CCMP1335]	1.33183	3	0.271873	0.584624	1.04397	3	0.845515	0.945173	1.67688	3	0.0886911	0.303674	1.3159	3	0.234677	0.595616	1.414	3	0.0170983	0.10102	1.78412	3	0.0089991	0.0504622	1.29152	3	0.039596	0.235485	1.65512	3	0.0443956	0.178474	0.829917	3	0.188981	0.527915	0.886152	3	0.50145
606	EED89471.1	260	42580.9	ADTLDPALLRPGR;KIEFPQPDR;GVLLYGPPGTGK;EALKPNTSIALHR;VSCADVASICAEAGLQAVR;AVANATSATFISMVGSEFVQK;EAIELPLIQHHLYTQIGIDPPR	0;0;0;1;0;0;0	1	3	52307;212988;212990;212991;222475;222476;222477;229298;229300;229303;229304;229306;288110;288112;288113;318806;353869;357329	XP_002293010.1	26S proteasome ATPase regulatory subunit [Thalassiosira pseudonana CCMP1335]	0.909345	3	0.482852	0.776453	1.11925	3	0.312369	0.679649	0.822696	3	0.259674	0.575952	1.04316	3	0.745625	0.913606	0.953709	3	0.744126	0.920683	0.888637	3	0.577242	0.799259	0.92548	3	0.573943	0.854042	0.846363	3	0.261874	0.555924	0.906368	3	0.452555	0.791062	0.938769	3	0.811519
607	EED89909.1	568	18339	HVVFGEVVSGMEVVR	1	1	3	268133;268149;271190	XP_002292713.1	predicted protein, partial [Thalassiosira pseudonana CCMP1335]	0.844401	3	0.249675	0.557431	0.996713	3	0.984902	0.995041	0.722147	3	0.090391	0.308322	0.855947	3	0.235576	0.597059	1.03314	3	0.79552	0.92665	0.94515	3	0.722928	0.888239	1.00788	3	0.946205	0.985292	0.920769	3	0.561944	0.814788	0.901974	3	0.619638	0.893789	0.916227	3	0.542546
608	EED89924.1	1396	96526.4	LMIQANK;FYGADASSLMAR;AEAVVEETVMVDEEVEVEDDEEDATTTAEDAAAEEK	1;1;1	3	3	450;185388;370428	XP_002292728.1	heat shock protein, partial [Thalassiosira pseudonana CCMP1335]	1.14571	3	0.390161	0.70716	1.00693	3	0.943206	0.978972	1.14672	3	0.636136	0.865617	1.01212	3	0.948005	0.982349	0.986787	3	0.937806	0.982896	0.785594	3	0.154385	0.394684	0.928736	3	0.39836	0.756158	0.735889	3	0.380262	0.682803	1.10816	3	0.434657	0.781166	1.18417	3	0.541446
609	EED91176.1	1751	71547.5	LSLFTSVPK;TKPTQHSVK	1;1	2	3	187738;187739;266377	XP_002291069.1	ctp-synthetase [Thalassiosira pseudonana CCMP1335]	1.33055	3	0.0749925	0.275594	1.10831	3	0.477852	0.770805	1.46744	3	0.20228	0.50598	1.24757	3	0.114189	0.389712	1.12255	3	0.59724	0.862689	1.30283	3	0.131087	0.358052	1.17838	3	0.206579	0.57829	1.44684	3	0.0375962	0.157102	0.836487	3	0.215778	0.564116	0.754576	3	0.0990901
610	EED91442.1	1380	57634.8	VGFIDFGMVGR;VLEFLQPDFER	1;1	2	3	156606;161779;212391	XP_002291335.1;EJK44492.1;EJK59222.1	predicted protein [Thalassiosira pseudonana CCMP1335]	1.35354	3	0.090191	0.306649	0.759335	3	0.549245	0.826673	1.02462	3	0.887011	0.952031	0.578014	3	0.161884	0.479794	0.853313	3	0.176282	0.476523	0.635611	3	0.0273973	0.121766	0.949644	3	0.545345	0.844412	0.709253	3	0.0546945	0.209078	1.51607	3	0.0247975	0.157635	1.43356	3	0.0464953
611	EED91476.1	55	13702.3	AASDVYAPVSGK	1	1	3	230798;230804;230805	XP_002291369.1	glycine decarboxylase h-protein [Thalassiosira pseudonana CCMP1335]	1.32395	3	0.0785921	0.284064	0.690344	3	0.00779922	0.0785151	1.17369	3	0.468753	0.760725	0.60113	3	0.00909909	0.0731989	1.10624	3	0.566343	0.846124	1.09743	3	0.538646	0.774699	1.09506	3	0.30027	0.686658	1.10747	3	0.473753	0.755069	0.945456	3	0.657334	0.912663	0.930644	3	0.660434
612	EED91740.1	1458	32376.4	LYSIASTR;NNQWHVEVY;LYVQHVIAQNGK	1;1;1	3	3	71883;153636;274010	XP_002291633.1	predicted protein, partial [Thalassiosira pseudonana CCMP1335]	1.07334	3	0.60244	0.849449	1.15938	3	0.362164	0.694276	1.03025	3	0.859514	0.943893	1.13683	3	0.674633	0.892606	1.33393	3	0.0337966	0.167807	1.5954	3	0.0534947	0.198128	1.24247	3	0.225377	0.59813	1.50489	3	0.20498	0.480999	0.790969	3	0.110589	0.404369	0.827901	3	0.228577
613	EED91832.1	927	55692.2	ILLDAPCSGLGVISR	1	1	3	253776;253777;253779	XP_002290080.1;EJK49876.1	predicted protein, partial [Thalassiosira pseudonana CCMP1335]	0.693008	3	0.109189	0.346406	1.07166	3	0.530647	0.81189	0.56474	3	0.0158984	0.0954435	0.924742	3	0.567343	0.856959	0.79266	3	0.070193	0.282339	0.677687	3	0.0444956	0.171871	0.890975	3	0.206379	0.57829	0.754855	3	0.0792921	0.26843	1.0827	3	0.539246	0.843246	0.9933	3	0.959604
614	EED91842.1	1263	36984.8	FSQFDPAPR;QITQVYGFYDECLR;GAGYTFGQDITEQFTHINNLHFIAR	1;1;1	3	3	115191;294040;364415	XP_002290090.1	phosphatase of serine threonine protein phosphatase [Thalassiosira pseudonana CCMP1335]	0.951902	3	0.778822	0.928199	1.24713	3	0.0651935	0.312443	0.915765	3	0.805819	0.929712	1.23207	3	0.131487	0.423106	0.919946	3	0.592541	0.860144	1.11589	3	0.468853	0.733845	1.1274	3	0.334567	0.713274	1.39896	3	0.0844916	0.281795	1.03628	3	0.889011	0.978479	0.832438	3	0.461354
615	EED91852.1	324	15876.6	ANPMGGSTMAK;VAGVSLLALYK	1;1	2	3	206338;210384;223502	EJK47606.1;XP_002290100.1	RS23, ribosomal protein 23 40S small ribosomal subunit [Thalassiosira pseudonana CCMP1335]	0.382774	3	0.0339966	0.164241	0.5148	3	0.00049995	0.0123412	0.34832	3	0.29577	0.617961	0.406604	3	0.192981	0.537235	0.756206	3	0.314769	0.666525	0.391701	3	0.118388	0.33401	0.76512	3	0.019798	0.150532	0.384453	3	0.0523948	0.201584	0.874254	3	0.684532	0.915848	0.925431	3	0.765823
616	EED91877.1	391	99635.1	AEAMLEALR;CAACTGLGIAYAGSAR;SATSSMTSVPKPLK;VGQAVETVGQAGKPK;AELGTEEVLSVSSVLEGIVIVK	1;0;0;1;1	3	3	97430;259184;325940;327526;329341;358135	XP_002290125.1	26S proteasome regulatory subunit RPN1 2 [Thalassiosira pseudonana CCMP1335]	0.900704	3	0.574743	0.835905	1.13564	3	0.560744	0.829191	0.847692	3	0.338266	0.66727	1.13768	3	0.318168	0.677706	1.18136	3	0.534847	0.830822	1.32367	3	0.50255	0.75257	1.00867	3	0.916808	0.982686	1.0707	3	0.656634	0.868172	0.809273	3	0.437056	0.781575	0.918532	3	0.870713
617	EED92289.1	307	47475.6	LELGSLQSVR;AFPWFMK	1;1	2	3	126532;126533;167129	XP_002290537.1	predicted protein [Thalassiosira pseudonana CCMP1335]	0.644168	3	0.0167983	0.0982811	0.910232	3	0.351665	0.689554	0.528409	3	0.0339966	0.160703	0.756978	3	0.205579	0.555944	0.82216	3	0.277572	0.629956	0.610966	3	0.0181982	0.0917555	0.821987	3	0.326267	0.710065	0.608423	3	0.0175982	0.0918679	1.18963	3	0.551645	0.850393	1.20517	3	0.531447
618	EED92712.1	714	79866.4	GLSPATSVWR;DLLASGVIAAEK	1;1	2	3	117976;236004;236023	XP_002289175.1	predicted protein [Thalassiosira pseudonana CCMP1335]	1.06678	3	0.784622	0.931534	1.15766	3	0.472453	0.76764	1.07253	3	0.830617	0.93867	1.17319	3	0.584142	0.862868	0.897115	3	0.329867	0.684816	0.751536	3	0.10499	0.305795	0.852221	3	0.427557	0.776071	0.714261	3	0.177682	0.443471	1.37348	3	0.0787921	0.335099	1.45013	3	0.270273
619	EED93167.1	1270	124066	LLSEEVFDFSR	1	1	3	199563;199572;199573	XP_002289630.1	exportin1 [Thalassiosira pseudonana CCMP1335]	0.479883	3	0.00239976	0.0248527	1.11208	3	0.29957	0.671869	0.472094	3	0.00379962	0.0330585	1.13827	3	0.316568	0.67739	0.544879	3	0.00049995	0.00763483	0.502504	3	0.00369963	0.0270705	0.688026	3	0.00309969	0.0410709	0.606716	3	0.0141986	0.0772557	1.06306	3	0.633437	0.90012	0.914551	3	0.535646
620	EED93385.1	1555	89869.9	EVAVPMLTMR;WEMNALTQGR	1;1	2	3	140535;140536;159051	XP_002289848.1	predicted protein [Thalassiosira pseudonana CCMP1335]	0.981839	3	0.891111	0.973724	1.09353	3	0.373163	0.704603	0.936698	3	0.70183	0.895383	1.06203	3	0.676732	0.892606	1.27802	3	0.145585	0.425885	1.15232	3	0.358264	0.639025	1.33456	3	0.10019	0.407545	1.25067	3	0.142686	0.392331	0.826151	3	0.179482	0.518095	0.75965	3	0.10139
621	EED93445.1	640	56493.2	ILSDQAIR;SQDAITFAR;LFAANVGDSR	1;1;1	3	3	73114;98898;110848	XP_002289908.1	hypothetical protein THAPSDRAFT_262261, partial [Thalassiosira pseudonana CCMP1335]	0.787415	3	0.118288	0.366226	1.18445	3	0.207279	0.580898	0.60313	3	0.0226977	0.122391	0.92603	3	0.555744	0.848579	0.708517	3	0.0172983	0.101868	0.905174	3	0.60324	0.816415	0.755928	3	0.0161984	0.130895	0.955909	3	0.754725	0.90878	1.3727	3	0.139086	0.458271	1.31431	3	0.150885
622	EED93895.1	1376	28505.8	SIEPWLQTK;DLVPDMGNFYEQYR	1;1	2	3	215639;286833;286834	XP_002288459.1	precursor of hydrogenase, partial [Thalassiosira pseudonana CCMP1335]	0.866457	3	0.526547	0.809745	0.92322	3	0.686731	0.88964	1.01488	3	0.951805	0.974796	1.08868	3	0.731327	0.907606	1.37111	3	0.129587	0.393206	1.07696	3	0.630237	0.831082	1.2421	3	0.0632937	0.313338	1.01024	3	0.940806	0.98248	0.612481	3	0.00619938	0.0580869	0.642128	3	0.0733927
623	EED93949.1	847	113229	LAELNEYVK;NHFDFIVAAANLR;GNTQVVIPNVTENYGATR	0;1;1	2	3	209960;209961;209962;209963;235221;313687;313688	XP_002288513.1	ubiquitin activating enzyme 1 [Thalassiosira pseudonana CCMP1335]	1.02514	3	0.89911	0.97661	1.09539	3	0.608939	0.858638	1.01885	3	0.912009	0.960823	1.12796	3	0.431957	0.777609	1.15586	3	0.209779	0.523895	1.3812	3	0.0781922	0.251653	1.24161	3	0.124288	0.458177	1.53153	3	0.186181	0.457452	0.872491	3	0.377062	0.747339	0.786228	3	0.314769
624	EED94363.1	1418	74032.9	AVAAELEWVR;LGDVVIDVSGVK;AGIVGVIGPNGAGK	1;1;1	3	3	139751;239288;241393	XP_002288927.1	ABC transporter [Thalassiosira pseudonana CCMP1335]	0.74495	3	0.069693	0.264393	0.905838	3	0.480552	0.772277	0.636645	3	0.0361964	0.168015	0.783754	3	0.130687	0.422797	0.844225	3	0.153485	0.44182	0.668019	3	0.0906909	0.278544	0.805832	3	0.127687	0.462033	0.625318	3	0.162784	0.418222	1.06727	3	0.611439	0.89257	1.14024	3	0.371263
625	EED94434.1	1583	45645.2	SAQFEHTVLVTK;DCYPSPLNYYNFPK	1;1	2	3	271922;271936;329678	XP_002288998.1	methionine aminopeptidase [Thalassiosira pseudonana CCMP1335]	1.26366	3	0.243776	0.553254	1.12029	3	0.558844	0.829191	1.19094	3	0.309669	0.634487	1.07441	3	0.581542	0.862868	0.91995	3	0.441456	0.769916	1.2824	3	0.146685	0.383474	1.1233	3	0.20378	0.575738	1.58746	3	0.0136986	0.0752172	0.889695	3	0.381262	0.747848	0.721668	3	0.0627937
626	EED94448.1	83	98246.1	NPYVDCLNVLQAETLK;KLDATMK;REIASIWQTDEVSR	1;1;1	3	3	202543;221743;276900	XP_002289012.1;BAO52742.1	phosphoenolpyruvate carboxylase [Thalassiosira pseudonana CCMP1335]	0.879453	3	0.348765	0.666463	0.926537	3	0.672033	0.884231	0.901444	3	0.542246	0.817376	0.940324	3	0.723128	0.905414	0.94001	3	0.570443	0.846885	1.00986	3	0.955304	0.982038	0.926939	3	0.517648	0.823303	0.988453	3	0.933807	0.980633	0.931526	3	0.581342	0.869355	0.953034	3	0.813819
627	EED94578.1	1065	31332.1	EELALAVK;YLSGVGVAK;SQLPTLELDAVFEAK	1;0;0	1	3	150239;150243;150248;156877;156878;156879;156894;156896;156905;156906;317462;317468;317469;317481	XP_002287135.1	hypothetical protein THAPSDRAFT_268160 [Thalassiosira pseudonana CCMP1335]	0.746076	3	0.0706929	0.266503	0.804121	3	0.383962	0.707647	0.695339	3	0.0678932	0.254741	0.750349	3	0.0990901	0.355698	0.636544	3	0.00409959	0.0350117	0.718295	3	0.0740926	0.242045	0.943326	3	0.489951	0.81825	1.07359	3	0.617638	0.843981	1.18233	3	0.225277	0.576785	0.806087	3	0.176182
628	EED94749.1	197	38713.5	HLPEMAK;IFIDGEAGTTGLQVR	1;1	2	3	135257;254969;254976	XP_002287306.1;EJK76291.1	n-acetyl-gamma-glutamyl-phosphate reductase, urea cycle [Thalassiosira pseudonana CCMP1335]	3.06695	3	0.0001	0.00219734	1.32358	3	0.181682	0.549299	2.98172	3	0.00029997	0.00478094	1.30297	3	0.226077	0.586175	1.4558	3	0.0130987	0.0831121	2.23452	3	0.0315968	0.134455	1.3385	3	0.0121988	0.108287	2.11478	3	0.010299	0.0598337	1.08606	3	0.616538	0.893187	1.13028	3	0.665333
629	EED95067.1	834	42481.1	QLYLGDTIEVEYVR;MQQIAPGFVQQVQQR	1;1	2	3	278437;288634;291125	XP_002287624.1	hypothetical protein THAPSDRAFT_268157 [Thalassiosira pseudonana CCMP1335]	0.841351	3	0.491251	0.782799	1.05583	3	0.778222	0.913546	0.787768	3	0.563144	0.828613	1.00158	3	0.9963	0.9995	0.995922	3	0.975502	0.989783	0.884663	3	0.423058	0.700132	0.794495	3	0.125487	0.458678	0.674325	3	0.0268973	0.123577	1.20441	3	0.189981	0.527987	1.55171	3	0.0546945
630	EED95523.1	1398	29529.5	KVPVAVTHDGR;ECLPVAIILR	1;0	1	3	13541;234181;234182;152391;152392;152393;152394	XP_002288080.1	RS4, ribosomal protein 4 [Thalassiosira pseudonana CCMP1335]	0.694394	3	0.0938906	0.315655	0.781292	3	0.0484952	0.266428	0.890646	3	0.557244	0.82805	0.871884	3	0.290671	0.656829	1.00425	3	0.972103	0.989732	0.789501	3	0.160584	0.405401	1.18955	3	0.0809919	0.359476	1.07911	3	0.632937	0.852595	0.764799	3	0.0785921	0.335099	0.639709	3	0.050095
631	EED95701.1	825	183556	VLDWSTFR;SVAMNLTVPTR;NVISFDGSYVNYR;TMIESFEQFVNK	0;1;0;1	2	3	103329;158884;245764;294231;294235	XP_002286060.1	DNA directed RNA polymerase II, largest subunit [Thalassiosira pseudonana CCMP1335]	1.06825	3	0.625637	0.860808	1.45104	3	0.00759924	0.0773663	0.741573	3	0.113689	0.361755	1.08495	3	0.531347	0.837177	0.95811	3	0.69903	0.904273	1.00724	3	0.959704	0.984312	0.781194	3	0.140286	0.479352	0.77186	3	0.142186	0.392105	1.43585	3	0.0264973	0.16381	1.84398	3	0.00369963
632	EED95817.1	269	43242.1	YIDPSYMIR;QLYVIGGDGTHR	1;1	2	3	143945;143946;192784	XP_002286176.1	6-phosphofructokinase, partial [Thalassiosira pseudonana CCMP1335]	0.762696	3	0.0858914	0.298113	0.900415	3	0.30357	0.671869	0.782623	3	0.174983	0.466879	0.923351	3	0.538646	0.837691	0.810966	3	0.0942906	0.33316	0.863516	3	0.484252	0.743097	0.944683	3	0.507049	0.82179	1.0059	3	0.966103	0.988048	0.96888	3	0.852615	0.966016	0.842662	3	0.29617
633	EED95927.1	641	48394	VPVVDGEVTIK	1	1	3	228613;228631;228632	XP_002286286.1	predicted protein [Thalassiosira pseudonana CCMP1335]	0.762605	3	0.0858914	0.298113	0.769699	3	0.0357964	0.217065	0.67729	3	0.0551945	0.225306	0.684291	3	0.060494	0.271618	0.806983	3	0.0891911	0.323385	0.569277	3	0.00979902	0.054105	0.853461	3	0.10319	0.415062	0.601938	3	0.00909909	0.0546249	1.28428	3	0.0942906	0.364782	1.2173	3	0.209479
634	EED95973.1	1635	28558.4	LDILVNNVGTNIR;TNLESVFELTK	1;1	2	3	59309;256468;256469	XP_002286332.1	predicted protein, partial [Thalassiosira pseudonana CCMP1335]	1.19621	3	0.407759	0.718262	1.34887	3	0.0386961	0.229376	1.08711	3	0.661134	0.879856	1.29951	3	0.0693931	0.292848	1.17833	3	0.163784	0.460434	1.32953	3	0.105989	0.307216	1.3068	3	0.0533947	0.286046	1.54398	3	0.0181982	0.093911	1.22531	3	0.157384	0.48399	1.06863	3	0.641136
635	EED96239.1	1077	42396.6	VALTEDHVMWAR	1	1	3	10559;220938;224850	XP_002286598.1	predicted protein [Thalassiosira pseudonana CCMP1335]	0.809489	3	0.340866	0.65835	0.773758	3	0.387561	0.711187	0.912415	3	0.730527	0.905344	0.870175	3	0.573243	0.862385	1.02791	3	0.829217	0.934947	0.907415	3	0.793621	0.923411	1.01087	3	0.949105	0.985292	0.894909	3	0.448355	0.738106	0.757438	3	0.211479	0.558373	0.764107	3	0.106389
636	EED96494.1	942	27481.5	VGAGIDNVAGVK;VNALENVTIPK;SGMAADSSSAFFSLTQAEYAAGNFK	0;1;1	2	3	215149;215152;238485;238486;364595	XP_002286853.1	v-type h-atpase subunit [Thalassiosira pseudonana CCMP1335]	1.16883	3	0.575642	0.8363	1.13229	3	0.228477	0.602097	1.02305	3	0.90311	0.958563	1.00495	3	0.969703	0.991717	0.852787	3	0.213879	0.527958	1.28003	3	0.314969	0.599306	0.797526	3	0.247875	0.622972	1.18796	3	0.345265	0.653176	1.03304	3	0.79872	0.95303	1.10708	3	0.480952
637	EJK45231.1	1328	96398.3	TVVIQNVNECK	1	1	3	261186;261188;261189	-	hypothetical protein THAOC_36159, partial [Thalassiosira oceanica]	0.993698	3	0.961204	0.98641	1.26981	3	0.254275	0.632252	0.741258	3	0.110389	0.35534	0.968256	3	0.845815	0.950588	1.02902	3	0.79742	0.928013	0.916294	3	0.561744	0.788473	1.18722	3	0.222278	0.596048	1.0769	3	0.651135	0.866115	1.43877	3	0.227977	0.576785	1.23499	3	0.182582
638	EJK46216.1	217	96748.5	IGQSLSIR;AEELSVLLTK	0;1	1	3	62697;215893;215894;215913	-	hypothetical protein THAOC_35124 [Thalassiosira oceanica]	0.819193	4	0.360264	0.678365	1.03925	4	0.774023	0.913546	1.04702	4	0.883312	0.951462	1.33282	4	0.0442956	0.220168	0.802396	4	0.0263974	0.138279	0.593632	4	0.0113989	0.0608841	1.01182	4	0.932607	0.982782	0.758936	4	0.207179	0.483329	0.996007	4	0.976702	0.994138	0.914148	3	0.534147
639	EJK46404.1	477	27781	GPITPLGNFVLVR	1	1	3	210009;210010;210011	-	hypothetical protein THAOC_34927 [Thalassiosira oceanica]	1.62691	3	0.0118988	0.0763048	1.10032	3	0.666333	0.884231	1.82152	3	0.0134986	0.0859048	1.25397	3	0.106889	0.371843	1.65776	3	0.00159984	0.0167611	1.80747	3	0.00829917	0.0478798	1.17505	3	0.19778	0.57024	1.30643	3	0.0920908	0.297766	0.860168	3	0.333467	0.704801	1.15669	3	0.328367
640	EJK46458.1	772	48225.9	VGITDGFIR;VVYPGLASHPQK	0;1	1	3	90073;90074;259577;259581;259584	-	hypothetical protein THAOC_34874 [Thalassiosira oceanica]	0.942982	3	0.660334	0.872377	0.715899	3	0.029997	0.19585	1.79859	3	0.0262974	0.13455	1.32692	3	0.232077	0.592355	1.85473	3	0.00049995	0.00763483	2.33307	3	0.00129987	0.0125794	2.17078	3	0.0001	0.00367718	2.87726	3	0.00039996	0.00461749	0.507281	3	0.00079992	0.013576	0.406323	3	0.00019998
641	EJK46875.1	1059	37015.9	LGQSALDHSK;DILNNTLEQTK	1;1	2	3	204249;204263;258051	XP_002287052.1;EED96693.1	hypothetical protein THAOC_34435 [Thalassiosira oceanica]	1.06318	3	0.649135	0.869388	1.0247	3	0.915308	0.969087	1.08458	3	0.629737	0.862318	1.05164	3	0.70183	0.903334	1.06002	3	0.592541	0.860144	0.96883	3	0.831317	0.943689	1.25984	3	0.274873	0.65432	1.18754	3	0.349365	0.658855	1.0713	3	0.725827	0.931304	0.881539	3	0.707629
642	EJK46908.1	1289	5248.79	LTAQIPYHEGR	1	1	3	184363;184366;257334	EJK53522.1	hypothetical protein THAOC_34402, partial [Thalassiosira oceanica]	1.84326	3	0.0806919	0.287154	1.72569	3	0.172783	0.539609	1.44219	3	0.130987	0.397088	1.38285	3	0.316668	0.67739	1.68054	3	0.0964904	0.336756	2.85137	3	0.123488	0.343021	1.1011	3	0.274673	0.65432	1.88125	3	0.0311969	0.138048	0.874344	3	0.317768	0.695675	1.30631	3	0.381362
643	EJK47236.1	841	41302.8	GWEGLCTHVR;MGFNDQEIVALLCGGHVYGR;SLMDNPSWDDGSLAPIFIR	0;0;1	1	3	162017;162021;211614;341741;342827;334317;334318;335589	-	hypothetical protein THAOC_34061 [Thalassiosira oceanica]	1.26677	8	0.10049	0.327456	1.00517	8	0.956404	0.983652	1.43622	8	0.0287971	0.142875	1.1569	8	0.190581	0.533841	1.42918	8	0.00089991	0.0111837	1.71173	8	0.00139986	0.013332	1.41628	8	0.00429957	0.0503106	1.7532	8	0.00069993	0.00732892	0.846065	8	0.30287	0.676008	0.819513	8	0.30157
644	EJK47404.1	508	38919.3	YTEAVLAAEPSALLLANR	1	1	3	82897;309970;309975	-	hypothetical protein THAOC_33876 [Thalassiosira oceanica]	0.519645	3	0.0383962	0.176956	0.786527	3	0.257774	0.636314	0.479278	3	0.0149985	0.0925079	0.71927	3	0.117388	0.394988	0.857769	3	0.213079	0.527428	0.643696	3	0.0735926	0.241728	0.874765	3	0.153785	0.501121	0.647716	3	0.0181982	0.093911	1.10685	3	0.673633	0.913925	1.10951	3	0.638136
645	EJK49131.1	715	124973	MPLIGVFR;VLQLAQGMDFR;ANYQLSELVK	1;1;0	2	3	7974;81804;182138;230827	-	hypothetical protein THAOC_32027 [Thalassiosira oceanica]	0.66549	3	0.0232977	0.124577	1.15748	4	0.39676	0.718198	0.692503	4	0.0423958	0.184878	1.11127	4	0.581142	0.862868	0.684019	3	0.0105989	0.071266	0.872493	3	0.376762	0.655239	0.887225	4	0.259674	0.640127	1.14387	4	0.219078	0.503265	1.32218	3	0.0694931	0.307611	1.04444	4	0.683032
646	EJK49831.1	1076	27541.8	GWQEGLAMMK;ATLVIPPELAYGDAGSGGAVPPGATLK	0;1	1	3	64109;227431;227432;231261;234953;364066;364067;364068	-	hypothetical protein THAOC_31254 [Thalassiosira oceanica]	1.30741	8	0.0149985	0.0903923	1.05674	8	0.276872	0.651572	1.38159	8	0.0183982	0.104198	1.12374	8	0.117488	0.394988	1.00209	8	0.976202	0.989936	0.867129	8	0.0818918	0.260433	0.944777	8	0.262974	0.644733	0.814246	8	0.0446955	0.17928	1.17135	8	0.19718	0.539918	1.1555	7	0.120588
647	EJK50186.1	706	18263.7	NFNPFETFK	1	1	3	225760;225761;225762	XP_002292918.1;EED90114.1	hypothetical protein THAOC_30872 [Thalassiosira oceanica]	1.17719	3	0.645235	0.869388	1.55134	3	0.0420958	0.24313	1.42318	3	0.106389	0.347115	1.94645	3	0.0009999	0.0146489	1.73056	3	0.00079992	0.0102961	2.33129	3	0.00049995	0.00573191	1.47039	3	0.00219978	0.0322277	2.02249	3	0.00179982	0.0162888	0.226829	3	0.0001	0.0035271	0.252641	3	0.0001
648	EJK50234.1	755	54094.1	TVQGLTGGIEHLLK;GTLGGTCLNVGCIPSK;TAVPSIYAIGDCIDGPMLAHK	1;1;0	2	3	290611;290612;314358;356705;356707;357190	-	hypothetical protein THAOC_30825 [Thalassiosira oceanica]	2.38646	3	0.00029997	0.00505183	1.66004	3	0.00949905	0.0905677	1.64453	3	0.0337966	0.160178	1.19538	3	0.359864	0.708598	0.885526	3	0.444956	0.769916	1.73109	3	0.0110989	0.059994	1.2257	3	0.210979	0.579549	2.41559	3	0.00029997	0.00377794	1.12283	3	0.642836	0.90642	0.809746	3	0.357064
649	EJK50684.1	462	61215.2	DIDLVMSQAGCSR	1	1	3	226618;226619;226624	-	hypothetical protein THAOC_30285 [Thalassiosira oceanica]	0.970267	3	0.855914	0.960372	0.911872	3	0.359064	0.694276	0.973772	3	0.874213	0.949148	0.915049	3	0.49665	0.8109	0.989335	3	0.925507	0.977332	1.01608	3	0.944506	0.976513	1.01304	3	0.881112	0.97435	1.04685	3	0.849715	0.955232	0.779395	3	0.0956904	0.367836	0.753703	3	0.0946905
650	EJK51044.1	473	526508	LISYDNTVSFNR;RADYDNYVLMTK	1;1	2	3	221163;221170;294247	-	hypothetical protein THAOC_29824, partial [Thalassiosira oceanica]	0.806691	3	0.447655	0.750395	0.883867	3	0.233077	0.60779	0.986455	3	0.963904	0.983376	1.05894	3	0.660634	0.891065	1.12272	3	0.30307	0.654834	1.15182	3	0.359764	0.639896	0.987013	3	0.890111	0.974864	1.01118	3	0.936506	0.981133	0.825563	3	0.209479	0.557475	0.920479	3	0.563944
651	EJK52343.1	234	17999.4	AVSLGYW;KPDLTDPK	1;1	2	3	45422;243155;243158	YP_009093193.1;YP_874549.1;ABK20772.1;ADB27512.1;XP_002297529.1;AIR75450.1;AIR75591.1;YP_009093466.1;EJK54219.1;YP_004072558.1;AIR76139.1;sp|A0T0T7.1|PETD_THAPS;EED86169.1;EJK55855.1;AIR75866.1	hypothetical protein THAOC_28390 [Thalassiosira oceanica]	0.472469	3	0.00109989	0.013302	0.516499	3	0.0111989	0.101921	0.389022	3	0.00049995	0.00714611	0.424078	3	0.0009999	0.0146489	0.570879	3	0.00079992	0.0102961	0.54754	3	0.0079992	0.0469008	0.897591	3	0.316668	0.702754	0.869552	3	0.328167	0.637766	1.24165	3	0.240976	0.597545	0.796454	3	0.158484
652	EJK54495.1	395	66395.2	AVLHVALR;TFTTQETMTNAGTAK;FEDLLLDYSK;NQSNTPIYVDGK	0;0;1;0	1	3	63944;63959;63960;63963;63968;147816;310398;312341;248700;248703;248706;267411;267415	-	hypothetical protein THAOC_25871, partial [Thalassiosira oceanica]	1.54929	3	0.0170983	0.0997124	0.939516	3	0.528347	0.810972	1.80566	3	0.0134986	0.0859048	1.0905	3	0.507249	0.819788	1.52571	3	0.00589941	0.0460205	2.19089	3	0.00089991	0.00925622	1.20052	3	0.172883	0.53237	1.74343	3	0.00579942	0.0386358	0.725038	3	0.0438956	0.231578	0.894514	3	0.442456
653	EJK55364.1	967	29942.6	IIFGGQQLQDGK;TVDDYNIGDDATLHLVLR	1;1	2	3	261239;324684;324688	-	hypothetical protein THAOC_24909 [Thalassiosira oceanica]	1.03542	3	0.788721	0.933208	0.982409	3	0.913609	0.969087	1.04716	3	0.786521	0.921018	0.998081	3	0.9957	0.9995	1.06927	3	0.538846	0.830822	0.860373	3	0.332267	0.614154	0.885736	3	0.188281	0.549891	0.707925	3	0.0420958	0.171139	1.06981	3	0.60024	0.88729	1.29002	3	0.121688
654	EJK56442.1	1282	95178.4	QPSLFSVVR;VETCPISGTVAR;SIILVDHEDSFVHTLGNYLR	1;1;1	3	3	106043;185707;347444	EED95355.1;XP_002287912.1	hypothetical protein THAOC_23657, partial [Thalassiosira oceanica]	1.08517	3	0.547245	0.820763	1.07424	3	0.469953	0.76764	0.920074	3	0.739326	0.908874	0.935942	3	0.610239	0.874126	0.932599	3	0.522248	0.826624	1.29555	3	0.134687	0.362928	0.912393	3	0.29557	0.680101	1.25167	3	0.144286	0.395523	1.06426	3	0.627037	0.898837	1.09261	3	0.537946
655	EJK56445.1	184	104735	VIHGGMLGAK;VQWWFGDASK	0;1	1	3	184997;185002;185003;185004;185006;189561;189564;189565;189567;244421;244422;244423	-	hypothetical protein THAOC_23660 [Thalassiosira oceanica]	0.773995	3	0.147885	0.421945	1.00285	3	0.978402	0.993845	0.668062	3	0.0522948	0.216512	0.888738	3	0.409059	0.755251	0.943368	3	0.592541	0.860144	0.544997	3	0.00759924	0.0449955	0.975229	3	0.844016	0.960479	0.559541	3	0.00459954	0.0327422	0.790689	3	0.110389	0.404369	0.763549	3	0.213979
656	EJK56530.1	840	48826	GYIAVVNR;RLEQPGVQCVDLVYDELQR	1;1	2	3	67090;346802;346803	-	hypothetical protein THAOC_23566, partial [Thalassiosira oceanica]	0.766399	3	0.090191	0.306649	0.961172	3	0.888811	0.958491	0.577984	3	0.0544946	0.224075	0.755339	3	0.0547945	0.25383	1.02629	3	0.816418	0.93113	0.882783	3	0.415158	0.695674	1.14227	3	0.156084	0.505286	1.03473	3	0.816518	0.93785	1.15227	3	0.294771	0.66536	1.01536	3	0.916608
657	EJK56644.1	1479	26401.2	GILENLGF	1	1	3	60014;60019;60021	-	hypothetical protein THAOC_23429 [Thalassiosira oceanica]	0.830963	3	0.19848	0.486614	0.919668	3	0.588341	0.850875	0.606323	3	0.0347965	0.163625	0.686927	3	0.131287	0.423106	0.636487	3	0.112589	0.369554	0.267548	3	0.0158984	0.0812987	0.711845	3	0.0916908	0.386404	0.287253	3	0.0138986	0.0760833	1.13819	3	0.333967	0.704801	1.09555	3	0.527647
658	EJK57039.1	870	13089.8	SMEAELWQGHPK	1	1	3	281890;281897;284644	EJK68615.1	hypothetical protein THAOC_22963, partial [Thalassiosira oceanica]	0.931071	3	0.60014	0.849449	1.09626	3	0.361064	0.694276	1.08464	3	0.628837	0.862318	1.28879	3	0.0780922	0.310645	0.944418	3	0.59914	0.862689	0.785861	3	0.155184	0.395604	1.12697	3	0.413359	0.767531	0.956875	3	0.761024	0.909492	0.89336	3	0.688531	0.916029	0.74063	3	0.236776
659	EJK57197.1	1497	15060.8	FLIDGFPR;VVFVLGGPGAGK	1;1	2	3	86412;86418;215457	EED94991.1;XP_002287548.1	hypothetical protein THAOC_22787, partial [Thalassiosira oceanica]	0.6104	3	0.009999	0.0660007	0.96541	3	0.725227	0.902269	0.474801	3	0.00369963	0.0330585	0.763738	3	0.0627937	0.273981	0.736854	3	0.0621938	0.25764	0.68551	3	0.0488951	0.185678	0.829515	3	0.271773	0.653789	0.769875	3	0.0969903	0.308077	1.01709	3	0.949805	0.990535	0.91535	3	0.753825
660	EJK58053.1	521	15331.1	GSAVSGPVAK;AGSGDMVMCSVK	0;1	1	3	1644;248388;248391;248392	-	hypothetical protein THAOC_21848 [Thalassiosira oceanica]	0.786373	3	0.116588	0.363481	0.706246	3	0.0785921	0.350552	0.673207	3	0.070493	0.258044	0.599716	3	0.0880912	0.332093	0.917394	3	0.427657	0.763008	0.493155	3	0.00549945	0.0353536	0.855569	3	0.272273	0.653789	0.455717	3	0.0125987	0.0700319	0.948439	3	0.729127	0.931304	1.02106	3	0.881912
661	EJK59001.1	1679	55036.8	LGGSDIIVSELGLGTQR;GWGMCNDNAYGLTGCTR;LGTDYIDVYQLHWPAR	1;1;1	3	3	281585;313648;315374	-	hypothetical protein THAOC_20836 [Thalassiosira oceanica]	1.00434	3	0.990201	0.997396	1.0443	3	0.664734	0.884231	1.06779	3	0.70203	0.895383	1.11776	3	0.534147	0.837691	0.991379	3	0.940806	0.983371	1.12179	3	0.457954	0.724036	0.890921	3	0.39906	0.756158	0.987254	3	0.928207	0.978807	1.14955	3	0.40376	0.760623	1.29753	3	0.455154
662	EJK59733.1	581	35430.2	GLIDTVVGK;IPGGAALFFK	1;1	2	3	159369;195240;195241	-	hypothetical protein THAOC_20006 [Thalassiosira oceanica]	1.38153	3	0.0526947	0.220828	1.33052	3	0.070093	0.329785	1.65372	3	0.0242976	0.12758	1.65557	3	0.00419958	0.042755	1.21932	3	0.106889	0.360027	1.60913	3	0.0212979	0.101418	1.00881	3	0.934307	0.983423	1.3251	3	0.0792921	0.26843	0.789298	3	0.113589	0.411159	0.939177	3	0.658534
663	EJK63057.1	867	76305.5	GAELIIITDNK;GFGEPIAMEGALK;GAELIIITDNKK	1;0;1	2	3	236038;264345;264349;264351;264375;312594;312595	-	hypothetical protein THAOC_16308 [Thalassiosira oceanica]	1.11559	6	0.10399	0.336426	1.15518	7	0.179282	0.546643	1.29833	7	0.0136986	0.0862631	1.27547	7	0.00579942	0.0519928	1.14429	7	0.080292	0.302059	1.08312	6	0.327567	0.611006	0.956306	7	0.411459	0.767531	0.860983	5	0.0912909	0.29571	0.888941	7	0.254875	0.616186	1.05448	7	0.688931
664	EJK63072.1	390	106052	CAACTGLGIAYAGSAR;LMTPDNEWLYK;SATSSMTSVPKPLK	0;1;0	1	3	259184;281361;281367;281370;325940;327526	-	hypothetical protein THAOC_16289 [Thalassiosira oceanica]	0.981597	3	0.906809	0.979399	1.05863	3	0.606339	0.858638	1.04658	3	0.790521	0.9233	1.14831	3	0.418958	0.763316	0.903601	3	0.358864	0.709676	0.904442	3	0.506249	0.755268	1.01679	3	0.846415	0.960479	1.02266	3	0.884512	0.963994	0.785011	3	0.194481	0.535789	0.693333	3	0.216178
665	EJK63391.1	1232	150701	AFDQYVNFSEQR;SNPYFIVQQGK;YPESTDVAPLMEQCITFQPSVR	1;1;1	3	3	238856;256447;261904	-	hypothetical protein THAOC_15956 [Thalassiosira oceanica]	0.488181	3	0.0410959	0.187007	0.772881	2	0.181982	0.549299	0.783082	3	0.330767	0.662638	1.21773	3	0.675232	0.892606	0.806402	3	0.118188	0.377615	0.414251	3	0.00149985	0.0138448	1.00391	3	0.962604	0.98946	0.529773	3	0.0206979	0.1056	0.874621	3	0.741826	0.938498	1.02107	3	0.89981
666	EJK63640.1	7	36686.9	FPQLFTGK;VYIPLPEPEAR;AIIFIDEVDSLCGSR;AVATEADSTFFSVSSADLVSK	0;1;0;0	1	3	170663;184070;184071;184084;277828;277836;352679	-	hypothetical protein THAOC_15690 [Thalassiosira oceanica]	0.769526	7	0.0246975	0.129	1.05376	6	0.513749	0.79946	0.684355	7	0.0392961	0.176489	0.962471	6	0.771923	0.923642	0.737536	6	0.00039996	0.00643507	1.02321	7	0.924908	0.971483	0.764683	7	0.00259974	0.0360364	0.89988	7	0.293371	0.596344	1.26167	7	0.00219978	0.0288862	1.36112	7	0.00979902
667	EJK63739.1	1740	30651.8	VAELSSGALDPPELLR	1	1	3	272558;272560;272561	-	hypothetical protein THAOC_15586 [Thalassiosira oceanica]	0.985741	3	0.914109	0.979399	1.16094	3	0.167483	0.53419	1.2393	3	0.232677	0.537934	1.48309	3	0.0141986	0.102754	0.847655	3	0.161584	0.456517	1.28198	3	0.153485	0.394112	1.0622	3	0.474553	0.811925	1.64885	3	0.0116988	0.0660489	1.00882	3	0.948905	0.990535	0.812906	3	0.191481
668	EJK64762.1	460	41616.4	VLDVGCGFGGTSR;YDFIDEMMK;TADWCEPTIASWR;GLMEYGMFAATK	0;0;1;1	2	3	195070;237047;257912;264043;270251	-	hypothetical protein THAOC_14472 [Thalassiosira oceanica]	0.931185	5	0.414759	0.722465	0.888621	5	0.0818918	0.362572	0.914694	5	0.587541	0.839573	0.828236	4	0.0754925	0.305702	1.03526	3	0.753325	0.921723	0.895039	4	0.324468	0.609098	0.911575	5	0.317568	0.703884	0.710038	5	0.00409959	0.0300137	0.865245	5	0.325267	0.700638	0.8714	4	0.219978
669	EJK66150.1	916	26956.8	VADLTDDVFNYIFR	1	1	3	276440;276441;320563	EJK47646.1	hypothetical protein THAOC_12942 [Thalassiosira oceanica]	0.95506	3	0.725327	0.901779	1.107	3	0.610039	0.858638	0.915575	3	0.69763	0.895383	1.10175	3	0.457754	0.789565	0.726496	3	0.366063	0.712361	1.26407	3	0.163384	0.407577	0.972873	3	0.817918	0.95942	1.71095	3	0.00739926	0.0462711	0.906646	3	0.568543	0.856624	0.677434	3	0.318268
670	EJK66158.1	520	13356.7	ASQIVAEAR;AVDVLLSK	1;1	2	3	80666;141271;141272	-	hypothetical protein THAOC_12933 [Thalassiosira oceanica]	2.52266	3	0.0119988	0.0764023	2.30996	3	0.00019998	0.00621317	2.39629	3	0.0210979	0.116556	2.25616	3	0.00079992	0.0127562	0.918043	3	0.733527	0.91868	2.12866	3	0.186181	0.44143	1.08524	3	0.674533	0.892355	2.52011	3	0.0910909	0.295594	1.49463	3	0.0746925	0.323009	1.26674	3	0.173883
671	EJK66443.1	1473	54878.5	AEALQFLTEPQK	1	1	3	274847;274848;274855	-	hypothetical protein THAOC_12640 [Thalassiosira oceanica]	0.89024	3	0.39596	0.712096	1.16424	3	0.156784	0.520305	0.709579	3	0.0792921	0.281112	0.955109	3	0.748025	0.913606	1.07909	3	0.485651	0.798489	0.837027	3	0.262074	0.53586	1.11123	3	0.237776	0.61298	0.878249	3	0.363364	0.666102	1.15986	3	0.275972	0.642137	1.11195	3	0.461854
672	EJK66517.1	1136	44759.3	HLFPDAISALK	1	1	3	15696;241834;241840	-	hypothetical protein THAOC_12562 [Thalassiosira oceanica]	1.22557	3	0.177682	0.460696	1.2333	3	0.0740926	0.342346	1.6892	3	0.020398	0.113036	1.72074	3	0.00279972	0.031336	1.36394	3	0.0256974	0.136196	1.3081	3	0.123388	0.343021	1.26205	3	0.0551945	0.288291	1.24257	3	0.152485	0.40625	0.851503	3	0.242276	0.598373	0.889187	3	0.418758
673	EJK66644.1	1054	29229	LCDGLGPGFPIPVEITPFCHEHTIR	1	1	3	364598;364600;364601	-	hypothetical protein THAOC_12421 [Thalassiosira oceanica]	1.15567	3	0.345165	0.664517	1.0874	3	0.690531	0.891359	0.891427	3	0.60064	0.845119	0.906388	3	0.641936	0.889537	1.24815	3	0.0806919	0.302931	1.35126	3	0.325867	0.609098	1.1313	3	0.221978	0.596048	1.21884	3	0.464254	0.751555	0.774254	3	0.0884912	0.353028	0.820962	3	0.208979
674	EJK67264.1	1264	43303.2	FDVVECAANLK	1	1	3	253545;253546;253547	EJK54127.1	hypothetical protein THAOC_11730 [Thalassiosira oceanica]	0.857328	3	0.270873	0.584566	1.25138	3	0.0779922	0.349186	0.773635	3	0.263574	0.577444	1.16752	3	0.236676	0.597326	0.848605	3	0.163784	0.460434	0.74271	3	0.0955904	0.286594	0.948479	3	0.60254	0.870639	0.831673	3	0.213379	0.495052	1.04196	3	0.744426	0.941125	0.938484	3	0.654435
675	EJK67647.1	1330	44048.4	GTTVATLK;QMGEDGIFVLLEGR	1;1	2	3	124320;252246;252252	-	hypothetical protein THAOC_11293 [Thalassiosira oceanica]	1.37332	3	0.19538	0.482957	1.17095	3	0.607239	0.858638	1.45035	3	0.0710929	0.259713	1.27208	3	0.443156	0.787157	1.33446	3	0.353565	0.702451	1.44865	3	0.306969	0.58844	1.13381	3	0.584042	0.857737	1.24128	3	0.587341	0.826184	0.8497	3	0.516548	0.835732	0.982273	3	0.953405
676	EJK69435.1	608	26380.2	GVNTFSPEGR;LFQVEYAIEAIK	1;1	2	3	114878;114892;283851	EED88817.1;XP_002293808.1;EJK66699.1	hypothetical protein THAOC_09311 [Thalassiosira oceanica]	1.28487	3	0.182582	0.465216	1.08704	3	0.39996	0.718572	0.892203	3	0.49955	0.782809	0.771547	3	0.0721928	0.299061	1.09617	3	0.756424	0.921723	0.736386	3	0.148685	0.386195	1.08779	3	0.737326	0.921249	0.757884	3	0.156984	0.412743	1.30801	3	0.0780922	0.334495	1.27677	3	0.134887
677	EJK69682.1	167	67537.2	TDSIIESIVR;YGLPVDFTAVLYK;KGSPVVPGSLEK	1;0;1	2	3	136075;293789;293790;293792;296568;296569	-	hypothetical protein THAOC_09034, partial [Thalassiosira oceanica]	1.5064	4	0.00509949	0.0412075	1.05636	5	0.344666	0.687641	1.8493	6	0.00069993	0.0090041	1.58051	5	0.00029997	0.00607355	1.11814	6	0.138586	0.413078	1.75613	6	0.00769923	0.0454381	1.12695	6	0.105689	0.421355	1.79057	6	0.00189981	0.0169384	0.762674	6	0.0161984	0.117504	0.742768	6	0.0250975
678	EJK70670.1	1156	27019.9	FYDPVAAVVDR	1	1	3	173760;173761;173762	EJK57596.1	hypothetical protein THAOC_07951 [Thalassiosira oceanica]	0.687653	3	0.0346965	0.166728	0.830797	3	0.149785	0.509609	0.635181	3	0.0355964	0.166517	0.765269	3	0.0653935	0.279903	0.732581	3	0.089891	0.32368	0.899354	3	0.483052	0.74281	0.965575	3	0.681432	0.892355	1.19693	3	0.222278	0.506965	1.26817	3	0.107189	0.399241	0.983816	3	0.90391
679	EJK70717.1	1195	23293.9	YEVLDSAK;LDSKYEVLDSAK	1;1	2	3	166510;318754;318759	-	hypothetical protein THAOC_07899 [Thalassiosira oceanica]	1.34301	3	0.189581	0.474479	0.771034	3	0.0364963	0.219221	1.27049	3	0.355164	0.680458	0.728652	3	0.0368963	0.19555	1.06691	3	0.552245	0.839077	0.627	3	0.0237976	0.109275	1.03322	3	0.90271	0.979943	0.615175	3	0.030297	0.135733	1.04277	3	0.739426	0.93744	1.0622	3	0.833317
680	EJK70981.1	1687	18380.3	GTFGIVDILADLTK	1	1	3	290063;290065;290066	-	hypothetical protein THAOC_07617, partial [Thalassiosira oceanica]	0.779402	3	0.678432	0.880155	0.751563	3	0.484952	0.776785	1.19597	3	0.660634	0.879856	1.19941	3	0.508449	0.82099	1.09689	3	0.760924	0.921723	0.382428	3	0.319368	0.604482	0.873006	3	0.474553	0.811925	0.296217	3	0.182882	0.451811	1.16833	3	0.559244	0.853146	1.44093	3	0.133087
681	EJK73166.1	327	43924.9	QFATDEHVMVIR;WSAIMDTYEK;GGFGYHTTMPTDGLR	1;1;0	2	3	225199;228976;248812;311362;313364	-	hypothetical protein THAOC_05227, partial [Thalassiosira oceanica]	1.33401	3	0.0729927	0.272134	1.18377	3	0.213879	0.58655	1.53646	3	0.0426957	0.185289	1.38329	3	0.0336966	0.182887	1.48887	3	0.019498	0.110018	1.50301	3	0.154285	0.394684	1.33519	3	0.0130987	0.114582	1.39647	3	0.0644936	0.231842	0.860688	3	0.270173	0.634519	0.916455	3	0.543946
682	EJK73254.1	1443	117849	LEPAYGADVLR;AVLTHGFVLDEK;KLEPAYGADVLR;SWGVPIPVFYDK	0;1;0;0	1	3	158588;266126;266128;266135;266820;266825;281048;281049;281050	-	hypothetical protein THAOC_05131 [Thalassiosira oceanica]	1.38448	3	0.229977	0.531988	1.41442	3	0.0647935	0.311354	1.77225	3	0.110289	0.35534	1.8666	3	0.0213979	0.134045	1.19211	3	0.219978	0.537857	1.84284	3	0.0944906	0.285854	1.14555	3	0.178882	0.53457	1.78683	3	0.148485	0.401472	0.756538	3	0.0815918	0.341357	0.769951	3	0.115188
683	EJK74080.1	1333	89318.7	LATLSSGIR;GQVADMLK;LDDVVDLVIPR;FGLGAEVGISTGR;GSNALVSYIK	1;0;0;0;1	2	3	73664;146651;146652;151659;174497;177641;177642;203338;203341	-	hypothetical protein THAOC_04262, partial [Thalassiosira oceanica]	0.562276	3	0.0246975	0.129	0.780065	3	0.287471	0.661204	0.514718	3	0.00719928	0.0531389	0.719627	3	0.0317968	0.176845	0.707749	3	0.0946905	0.333918	0.812889	3	0.20328	0.46731	0.919027	3	0.675332	0.892355	1.06533	3	0.658634	0.869011	0.701591	3	0.208979	0.557475	0.537734	3	0.0879912
684	EJK74654.1	680	9800.18	FIALPDLLR;GLLLNAEDTMNMTLSEVVR	1;1	2	3	113277;113278;333288	EJK72932.1;XP_002293306.1;EED89042.1	hypothetical protein THAOC_03654 [Thalassiosira oceanica]	0.712135	3	0.263774	0.573366	0.799409	3	0.383262	0.70762	0.429262	3	0.131087	0.397088	0.498113	3	0.164484	0.48411	0.874665	3	0.359564	0.709676	0.813241	3	0.254075	0.525672	0.92169	3	0.421458	0.775278	0.854741	3	0.276272	0.573895	1.07634	3	0.568343	0.856624	1.02883	3	0.871213
685	EJK74770.1	816	15257	ICYYIDPIK;DVAHPFSLGMPVDR	0;1	1	3	235525;247295;247304;250732	-	hypothetical protein THAOC_03539 [Thalassiosira oceanica]	1.39901	4	0.029597	0.14612	1.16902	3	0.30207	0.671869	1.12439	3	0.489751	0.778771	0.975052	4	0.794721	0.93476	0.952032	4	0.537546	0.830822	1.52811	4	0.0432957	0.169441	0.934985	4	0.359964	0.736885	1.49489	4	0.0636936	0.230707	1.22334	4	0.40096	0.760623	1.2444	4	0.421858
686	EJK75236.1	1104	14827.5	VLGPIMSK	1	1	3	141253;146423;146424	EED96000.1;XP_002286359.1	hypothetical protein THAOC_03046 [Thalassiosira oceanica]	0.543848	3	0.00389961	0.0342785	0.628111	3	0.0019998	0.0324652	0.385318	3	0.00049995	0.00714611	0.444723	3	0.0009999	0.0146489	0.757323	3	0.0773923	0.297993	0.463273	3	0.00109989	0.010878	1.21092	3	0.414559	0.767531	0.769719	3	0.194781	0.466489	1.59717	3	0.00789921	0.0700033	1.00325	3	0.981102
687	EJK75265.1	1105	48008	ANMPLFLLK	1	1	3	202011;202012;205862	-	hypothetical protein THAOC_03016 [Thalassiosira oceanica]	0.662051	3	0.0780922	0.283143	0.89937	3	0.780322	0.913546	0.537277	3	0.0291971	0.143672	0.720804	3	0.0322968	0.176896	0.755337	3	0.0369963	0.181161	0.443212	3	0.00049995	0.00573191	0.941502	3	0.636736	0.87856	0.567676	3	0.0313969	0.138254	1.7083	3	0.10049	0.380592	1.42369	3	0.287271
688	EJK75371.1	1166	70227	FILSIGPQTTK	1	1	3	240250;240251;240253	-	hypothetical protein THAOC_02906 [Thalassiosira oceanica]	0.693731	3	0.0340966	0.164284	0.854626	3	0.146685	0.502523	0.495642	3	0.00539946	0.0432197	0.620024	3	0.00549945	0.0503046	0.61644	3	0.0019998	0.0199096	0.91257	3	0.543846	0.777539	0.754128	3	0.0147985	0.122889	1.09072	3	0.687231	0.887243	1.25251	3	0.124988	0.430752	1.06996	3	0.636736
689	EJK75665.1	1745	163526	AAVVAMEAR	1	1	3	73559;73560;73600	-	hypothetical protein THAOC_02607 [Thalassiosira oceanica]	0.728716	3	0.0552945	0.228011	0.884965	3	0.235576	0.609051	0.713989	3	0.0823918	0.288131	0.870175	3	0.284172	0.652044	1.53168	3	0.0183982	0.106261	0.976528	3	0.870213	0.955914	1.08567	3	0.342366	0.724323	0.701764	3	0.0387961	0.160995	0.744782	3	0.180082	0.518095	1.02222	3	0.876312
690	EJK75726.1	338	40676.6	FDYFGMIER;SVASKPYSK	0;1	1	3	150300;150301;150302;155139;254682;254683;254684	-	hypothetical protein THAOC_02542 [Thalassiosira oceanica]	0.797664	7	0.00869913	0.0584919	0.80461	7	0.0174982	0.135521	0.65608	7	0.00379962	0.0330585	0.660861	7	0.0001	0.00261133	0.75576	6	0.00069993	0.00941249	0.459758	7	0.0001	0.0016362	0.875084	7	0.133987	0.470146	0.565481	7	0.00019998	0.00262893	0.976071	7	0.79912	0.95303	0.804136	7	0.164684
691	EJK75781.1	1802	33014.9	NPYMGFADFR;AQQLENWANQQEVR	1;1	2	3	162831;167829;281318	-	hypothetical protein THAOC_02488 [Thalassiosira oceanica]	1.88489	3	0.0375962	0.175061	1.49986	3	0.19948	0.574348	1.58526	3	0.0326967	0.156676	1.28614	3	0.345565	0.697726	1.52208	3	0.0555944	0.241971	1.62736	3	0.0666933	0.227795	1.20424	3	0.0639936	0.315565	1.30805	3	0.089891	0.292227	1.53789	3	0.0924908	0.360153	1.89056	3	0.0885911
692	EJK75979.1	1511	51630.7	DVLDPALIRPGR	1	1	3	194472;194473;194474	-	hypothetical protein THAOC_02286 [Thalassiosira oceanica]	0.875349	3	0.333467	0.65245	1.04718	3	0.641636	0.87131	0.632213	3	0.0337966	0.160178	0.774776	3	0.0767923	0.308883	1.14041	3	0.249675	0.588123	0.583391	3	0.0123988	0.0656405	0.805911	3	0.209879	0.57829	0.402553	3	0.00569943	0.038301	1.2354	3	0.143686	0.466589	1.76439	3	0.00559944
693	EJK76019.1	255	219749	AVFTLAR;AAPALIDPR;ALQDAMSGVIDR;ILVDLPDLETR	0;1;1;0	2	3	42112;75159;181482;181493;184123	-	hypothetical protein THAOC_02237 [Thalassiosira oceanica]	0.900328	3	0.440356	0.741609	0.858992	3	0.163284	0.529567	0.96425	3	0.888311	0.952291	0.912536	3	0.716628	0.905182	1.05018	3	0.772623	0.921723	0.869642	3	0.366163	0.644906	1.09478	3	0.307269	0.69299	0.922496	3	0.571243	0.820421	1.10008	3	0.464954	0.80087	1.04715	3	0.752625
694	EJK77308.1	886	56521.2	AEAILEWMDR;AEQILAWMEK	1;1	2	3	167876;167891;243271	EED88886.1;XP_002293877.1	hypothetical protein THAOC_00867, partial [Thalassiosira oceanica]	0.905258	3	0.757224	0.91516	0.878188	3	0.512049	0.79946	0.870978	3	0.616538	0.855459	0.854544	3	0.39506	0.739251	0.833263	3	0.130287	0.393206	0.796553	3	0.173083	0.423458	0.928946	3	0.386161	0.755158	0.885379	3	0.392061	0.690226	0.824882	3	0.341566	0.712024	0.746028	3	0.261574
695	EJK77652.1	175	24785.3	VTLPGGDLFIEWR	1	1	3	238745;238746;238747	EED87212.1;XP_002296516.1;EJK71279.1	hypothetical protein THAOC_00502 [Thalassiosira oceanica]	1.18554	3	0.586941	0.839419	1.02544	3	0.907609	0.966605	1.47844	3	0.145485	0.423295	1.25794	3	0.10319	0.366039	1.16567	3	0.187881	0.494777	1.54013	3	0.0318968	0.135092	1.09652	3	0.293771	0.680101	1.46933	3	0.0324967	0.142055	0.894653	3	0.40106	0.760623	0.919217	3	0.558344
696	XP_002286057.1	1460	42665.4	VYPSDANFLLFR;LLFLCSPGNPTAK	1;1	2	3	224402;224404;282819	EED95698.1	histidinol-phosphate aminotransferase [Thalassiosira pseudonana CCMP1335]	1.25109	3	0.29907	0.613969	1.13591	3	0.338566	0.685501	1.20347	3	0.29787	0.619474	1.13754	3	0.629237	0.885578	1.01264	3	0.953505	0.984864	1.51991	3	0.0349965	0.144813	1.14685	3	0.508649	0.82179	1.73919	3	0.00719928	0.0453353	0.910627	3	0.682032	0.915848	0.797972	3	0.453955
697	XP_002286238.1	882	74313.4	TFEIPAQGVVLVR;LPNVSASIPQLDACVAELR;DYLTDLFPILELGTSAK	1;1;0	2	3	221293;326979;326983;339195;339196;339197	EED95879.1	hypothetical protein THAPSDRAFT_1456 [Thalassiosira pseudonana CCMP1335]	0.577814	3	0.128387	0.384568	1.13545	3	0.407559	0.723568	0.641713	3	0.10489	0.345982	1.28132	3	0.0831917	0.321009	1.03365	3	0.808219	0.930119	0.823188	3	0.371263	0.651338	0.953906	3	0.759824	0.933972	0.767829	3	0.227677	0.511918	0.953455	3	0.828217	0.95633	1.02042	3	0.936406
698	XP_002286387.1	50	74150	GSSAAGLTASVVR;SASENIDLMSTILSR	1;1	2	3	149813;149819;266874	EED96028.1;ACJ03843.1	mcm5-like protein [Thalassiosira pseudonana CCMP1335]	0.823758	3	0.181382	0.464276	0.975674	3	0.859414	0.948547	0.859811	3	0.369663	0.689196	1.02363	3	0.886111	0.965985	0.932978	3	0.621138	0.878299	0.637428	3	0.0279972	0.123215	1.07071	3	0.461154	0.804452	0.746598	3	0.0716928	0.251694	1.38052	3	0.0429957	0.228844	1.20644	3	0.227277
699	XP_002286779.1	1483	16425.2	LVCGGCLDFK	1	1	3	231636;231650;231667	EED96420.1	predicted protein [Thalassiosira pseudonana CCMP1335]	1.45993	3	0.0574943	0.232701	1.32752	3	0.0273973	0.182169	2.13159	3	0.0108989	0.0721652	1.95872	3	0.0009999	0.0146489	2.19046	3	0.00079992	0.0102961	1.9068	3	0.00649935	0.0400645	1.16226	3	0.119788	0.448769	1.01841	3	0.89611	0.967563	0.453172	3	0.0001	0.0035271	0.832515	3	0.236176
700	XP_002287096.1	617	25869.6	GADGILAQFR	1	1	3	110355;110364;110365	EED96737.1	predicted protein [Thalassiosira pseudonana CCMP1335]	0.764333	3	0.128487	0.384568	0.975711	3	0.875412	0.953168	0.536428	3	0.0106989	0.0713658	0.70245	3	0.0228977	0.13987	1.41867	3	0.0156984	0.0952477	1.26341	3	0.182582	0.437031	1.2259	3	0.0526947	0.284839	1.12197	3	0.556344	0.811972	1.08187	3	0.543646	0.846037	1.20738	3	0.225677
701	XP_002287277.1	347	64107.9	HLLLHGPPGTGK;NALNAFLYR;KGLLLFVDEADAFLQSR	1;1;1	3	3	16602;120461;341086	EED94720.1	hypothetical protein THAPSDRAFT_21258 [Thalassiosira pseudonana CCMP1335]	0.784773	3	0.469253	0.76749	0.797738	3	0.059994	0.3008	0.609789	3	0.174783	0.466879	0.630401	3	0.00669933	0.0588887	0.648913	3	0.00529947	0.0428235	0.501783	3	0.00359964	0.026664	0.748586	3	0.131887	0.467835	0.554315	3	0.00409959	0.0300137	1.16069	3	0.272973	0.638593	1.06101	3	0.70433
702	XP_002287991.1	61	51219.7	HLVNSPLVK	1	1	3	191670;191674;191675	EED95434.1;sp|B8BVB6.1|ARGJ_THAPS;EJK49674.1	predicted protein [Thalassiosira pseudonana CCMP1335]	1.1621	3	0.352665	0.673201	0.952803	3	0.624838	0.859509	1.68937	3	0.111789	0.357605	1.3725	3	0.139586	0.44006	1.57014	3	0.010199	0.0696158	1.42638	3	0.0592941	0.213751	1.72713	3	0.00079992	0.015668	1.64323	3	0.029697	0.134046	0.631165	3	0.00859914	0.0743743	0.543862	3	0.00869913
703	XP_002288047.1	364	125124	AVALDVQANQIR;VPISDMTTVMTVVPK	1;1	2	3	188187;188238;312421	EED95490.1	predicted protein [Thalassiosira pseudonana CCMP1335]	0.931431	3	0.60174	0.849449	0.806228	3	0.0692931	0.329462	0.755294	3	0.20138	0.50598	0.65445	3	0.0507949	0.240875	0.738041	3	0.106389	0.359014	0.981067	3	0.893811	0.967444	0.696821	3	0.236976	0.611793	0.895361	3	0.437156	0.727139	1.08605	3	0.720728	0.931048	1.18059	3	0.609939
704	XP_002288069.1	1347	42700.1	ILHFYTLNLEK	1	1	3	277989;277990;277993	EED95512.1	methylenetetrahydrofolate reductase [Thalassiosira pseudonana CCMP1335]	1.26456	3	0.179982	0.461604	0.889087	3	0.335166	0.685302	1.77028	3	0.0152985	0.0937161	1.22344	3	0.143586	0.448425	1.29357	3	0.050395	0.225339	1.40959	3	0.0668933	0.227955	1.5033	3	0.009999	0.0953344	1.69361	3	0.0485951	0.191485	0.665706	3	0.0346965	0.200061	0.551312	3	0.0762924
705	XP_002288245.1	723	102455	MIGATTLEEYR;TLDMGALVAGAK;ISDAALITAAQLSDR	1;1;1	3	3	183904;226576;248271	EED93681.1	member of the HSP104/clp superfamily [Thalassiosira pseudonana CCMP1335]	0.594754	3	0.00779922	0.0538475	0.948687	3	0.672333	0.884231	0.62215	3	0.029697	0.145338	0.994154	3	0.963904	0.989154	0.815446	3	0.10019	0.341936	0.804354	3	0.187381	0.443215	0.963384	3	0.660834	0.887638	0.954874	3	0.748425	0.907686	1.07266	3	0.586141	0.873627	0.914315	3	0.534147
706	XP_002288253.1	314	33295.1	LLDYTVDR;ADEIFGWLK;GIFISFGNASGAVPAFPVLR	1;0;0	1	3	10555;95054;95060;209936;209937;209938;209939;323651	EED93689.1	predicted protein [Thalassiosira pseudonana CCMP1335]	1.19295	3	0.382062	0.70293	0.702779	3	0.00949905	0.0905677	1.20078	3	0.288571	0.608567	0.693649	3	0.019998	0.128428	1.15962	3	0.20038	0.511962	1.37473	3	0.0924908	0.281698	1.2567	3	0.0938906	0.391646	1.53875	3	0.0366963	0.154056	0.908693	3	0.523148	0.838968	0.813824	3	0.211179
707	XP_002288348.1	223	13747.8	AQSLTLQR;DGKPIFLGSSK	1;1	2	3	73323;73327;288554	EED93784.1;EJK61686.1	RL24, ribosomal protein 24 60S large ribosomal subunit, partial [Thalassiosira pseudonana CCMP1335]	0.517778	3	0.0136986	0.0851205	0.56364	3	0.00269973	0.0377125	0.434967	3	0.126387	0.386458	0.469372	3	0.0838916	0.32233	0.599453	3	0.106289	0.359014	0.315116	3	0.0619938	0.218802	0.789464	3	0.0288971	0.193529	0.415022	3	0.0757924	0.26301	1.25746	3	0.529847	0.843246	0.989668	3	0.959604
708	XP_002288591.1	1656	17205.4	CNFTAVDIFTGK	1	1	3	274416;274419;274425	EED94027.1	eucarytic translation initiation factor 5A [Thalassiosira pseudonana CCMP1335]	1.55666	3	0.0161984	0.0966539	1.19615	3	0.110589	0.429337	1.80693	3	0.230477	0.53608	1.41166	3	0.49845	0.812122	0.62365	3	0.00219978	0.0216612	1.70699	3	0.0133987	0.0695031	0.6621	3	0.0244975	0.171103	1.78185	3	0.00479952	0.033634	0.962464	3	0.761324	0.942616	0.923508	3	0.580242
709	XP_002288737.1	1183	64156.5	DFGIPYEVDIVSAHR	1	1	3	282048;282056;323853	EED94173.1	predicted protein [Thalassiosira pseudonana CCMP1335]	0.925461	3	0.568043	0.83252	1.09321	3	0.374463	0.704603	0.7853	3	0.250375	0.562953	0.959685	3	0.836916	0.948076	0.851609	3	0.173083	0.473285	0.724626	3	0.0786921	0.252488	0.944155	3	0.59874	0.867044	0.797778	3	0.140486	0.391337	1.27264	3	0.213179	0.560685	1.17486	3	0.285271
710	XP_002288953.1	1020	61959.4	YDIYDAVLR;LDAYGLYLPSR	1;1	2	3	134503;179010;179011	EED94389.1	predicted protein [Thalassiosira pseudonana CCMP1335]	0.516759	3	0.00259974	0.0261717	0.790626	3	0.0527947	0.283143	0.356261	3	0.0486951	0.204906	0.550263	3	0.0319968	0.176886	0.814784	3	0.0988901	0.339429	0.510918	3	0.0313969	0.134238	0.98297	3	0.841916	0.960479	0.626534	3	0.132887	0.379285	1.09703	3	0.476852	0.807015	0.92392	3	0.582642
711	XP_002289509.1	863	45977.2	TVYTHNEWVK	1	1	3	255623;255630;307923	EED93046.1	predicted protein [Thalassiosira pseudonana CCMP1335]	0.782786	3	0.111689	0.351859	0.603046	3	0.0481952	0.26614	0.995287	3	0.976402	0.987873	0.749677	3	0.049995	0.238968	1.21077	3	0.115788	0.373926	0.652751	3	0.0333967	0.138831	1.18617	3	0.139486	0.479352	0.653659	3	0.0587941	0.219603	1.11325	3	0.526547	0.842008	1.11469	3	0.545045
712	XP_002289836.1	966	45090.1	IVFSSSPSTR;VISFDVVPPPK;DNLFLPNLLEAAMNGK	1;1;1	3	3	120157;238483;328025	EED93373.1	predicted protein [Thalassiosira pseudonana CCMP1335]	0.746395	3	0.232477	0.535707	0.719945	3	0.0436956	0.249967	0.674285	3	0.365963	0.685848	0.64711	3	0.236376	0.597326	0.625778	3	0.00839916	0.0605411	0.525006	3	0.00589941	0.0372594	0.65736	3	0.0109989	0.101641	0.541509	3	0.0221978	0.110325	0.899109	3	0.773023	0.945725	0.874408	3	0.593141
713	XP_002289996.1	869	40372.5	VSMIICDDGNYPEIWR	1	1	3	317712;317713;319590	EED93533.1	aliphatic amidase [Thalassiosira pseudonana CCMP1335]	1.58091	3	0.0149985	0.0903923	1.291	3	0.039596	0.233941	1.91485	3	0.040496	0.179197	1.59293	3	0.0260974	0.154696	1.26467	3	0.293571	0.642008	1.3503	3	0.288871	0.570896	1.13603	3	0.49615	0.82116	1.19777	3	0.49795	0.770454	1.56459	3	0.019898	0.137679	1.72772	3	0.00719928
714	XP_002290050.1	819	8601.27	YGDCFIR;SPSDFLK	1;1	2	3	76779;125066;125068	EED91802.1;EJK73758.1	hypothetical protein THAPSDRAFT_262381, partial [Thalassiosira pseudonana CCMP1335]	0.894135	3	0.411559	0.721429	0.788263	3	0.117988	0.445733	0.836691	3	0.441856	0.740952	0.738154	3	0.288371	0.656117	0.946005	3	0.609739	0.869952	0.751551	3	0.10499	0.305795	1.26445	3	0.409059	0.767531	1.01679	3	0.911609	0.974386	1.08874	3	0.688531	0.916029	0.806009	3	0.176082
715	XP_002290106.1	1150	21260.8	LAAYDVGCLVTK	1	1	3	262379;262407;262410	EED91858.1	predicted protein [Thalassiosira pseudonana CCMP1335]	1.1114	3	0.553345	0.823009	1.30158	3	0.0354964	0.217065	1.10271	3	0.559644	0.828259	1.31438	3	0.0585941	0.265746	0.947816	3	0.830917	0.934947	1.1218	3	0.733727	0.895395	1.18837	3	0.0821918	0.363007	1.43344	3	0.19538	0.4665	0.926879	3	0.773823	0.945725	0.729058	3	0.135786
716	XP_002290124.1	35	47326.8	YEAAVCGGIPIIR;VLADIEALSWCK;YPTANSCINDIVALAK	0;1;0	1	3	218849;218851;218857;280545;280546;280551;327141;327146;327148	EED91876.1	predicted protein [Thalassiosira pseudonana CCMP1335]	1.04642	3	0.792221	0.936119	0.998124	3	0.984102	0.995041	1.2997	3	0.145385	0.423295	1.23596	3	0.126987	0.414876	1.24683	3	0.0814919	0.304034	1.32505	3	0.178282	0.430749	1.26482	3	0.0294971	0.195418	1.35618	3	0.0637936	0.230707	0.703515	3	0.0455954	0.235032	0.679985	3	0.0365963
[truncated: 1,052 more rows]
[truncated: 73 more columns]
