# Supplementary material for: Quantitative Proteomic Analysis Reveals Novel Insights into Intracellular Silicate Stress-Responsive Mechanisms in the Diatom Skeletonema dohrnii
Source: Int J Mol Sci. 2019 May 23;20(10):2540. doi: 10.3390/ijms20102540 (PMC6566588; doi:10.3390/ijms20102540)
Supplement: Supplementary file 1 [file ijms-20-02540-s001.zip › IJMS-Table S2.xlsx]

## Sheet: Table S2
Title	Quantitative Proteomic Analysis Reveals Novel Insights into Intracellular Silicate Stress-Responsive Mechanisms in the Diatom Skeletonema dohrnii
Authors	Thangaraj Satheeswaran, Shang Xiaomei, Sun Jun*, Liu Haijiao
Table S2	Identified downregulation proteins subject to Si-limited-vs-Si-added condition
No.	Protein-ID	Description	Mass	Protein-Coverage	Uniq_Pep_Num	Uniq_Spec_Num	Mean ratio	Std Dev	P_value	Protein_ID	Protein_Seqence	NCBInr Identity	NCBInr E-value	NCBInr Accession	NCBInr Description	Swissprot Identity	Swissprot E-value	Swissprot Accession	Swissprot Description	COG Score	COG E-value	COG ID	COG Function-Description	COG Code	COG Function-Categories	KEGG(ko_id|rank|evalue|score|identity|ko_definition)	GO Biological_Process	GO Molecular_Function	GO Cellular_Component
1	AFO84283.1	photosystem II protein D1, partial (chloroplast) [Stephanodiscus hantzschii]	35595.7	0.062	2	15	0.55	0.179	0.03164	AFO84283.1	RREGVSLWERFCAWITSTENRLYIGWFGCLMFPTLLTATSCFIIAFIAAPPVDIDGIREPVAGSLLYGNNIISGAVIPSSNAIGMHFYPIWEAASVDEWLYNGGPYQLIVLHFLLGVASYMGREWELSYRLGMRPWIFVAFSAPVAAASAVFLVYPIGQGSFSDGMPLGISGTFNFMLVFQAEHNILMHPFHMAGVAGVFGGSLFSAMHGSLVTSSLIRETTENESTNYGYKFGQEEETYNIVAAHGYFGRLIFQYASFNNSRALHFFLALWPVLGIWLTAMGISTMAFNLNGFNFNQSVVDSQGRVINTWADIINRADL	100	0	gi|691189961|gb|AIR75475.1|	photosystem II protein D1 (chloroplast) [Cyclotella sp. L04_2]	100	0	sp|A0T0W2|PSBA_THAPS	Photosystem II protein D1 OS=Thalassiosira pseudonana GN=psbA PE=3 SV=1	-	-	-	-	-	-	K02703|1|0.0|575|mtr:MTR_0002s0380|	GO:0009772//photosynthetic electron transport in photosystem II;GO:0009635//response to herbicide	GO:0016491//oxidoreductase activity;GO:0045156//electron transporter, transferring electrons within the cyclic electron transport pathway of photosynthesis activity;GO:0005506//iron ion binding	GO:0030076//light-harvesting complex;GO:0009523//photosystem II;GO:0016021//integral component of membrane;GO:0009535//chloroplast thylakoid membrane
2	EED94012.1	predicted protein [Thalassiosira pseudonana CCMP1335]	33583.7	0.077	1	1	0.53	0.063	0.00174	EED94012.1	MSTYSDYFVVSQKNGLSQFQTMTAYLGGSAFQTVLDNPVTAYRQLVQQYAKDAAGKAVDPKIATSEATAVFKANPVGACLSGLVPRIIGVGFKRVPKFGILLGLSFFLGEDGTISATAAFGASVLSAPFINPIRMIEKQQRAYFKTTGVEKPIMEILRESARHNFVPLFRGTVPLMGHSLASALLGLAGQPKLQKYIKEELSHHGIGNFTSGLLASAAVTPIYVGVTNPLSRLEVIMQTSKIDGKAIGLTEACKEMVTDSKQFGLRGVFRGQGLGIAKGILSLTAFHQGRIWLTDAFRNHNISNGSYTPVGSA	100	0	gi|223997806|ref|XP_002288576.1|	predicted protein [Thalassiosira pseudonana CCMP1335]	-	-	-	-	-	-	-	-	-	-	-	-	-	-
3	EJK76865.1	hypothetical protein THAOC_01347 [Thalassiosira oceanica]	67263.6	0.041	2	2	0.76	0.107	0.02737	EJK76865.1	MVACDSSGPLVIHVAKLYAESDGQSFSAFGRIYSGTVRPGDRVKVLGEAYTPDDDEDMAFATVSSVWIPRGRSRTEVMMARAGNWVLLGGVDADIVKTATIVAAGKSNFGGDDGDGEIHVFRPLRFPQAGGESTMKLAVEPLNPAELPKMVEGLRRVSKSYPMATTRVEESGEHILFGTGELYLDCAMHDLRQVYSDIEVKVADPVVGFRETVVETSSVKCFSETANKRNRLTFIAEPLDDGLAEKLENGKINLDWDKRKLGRFFQSKYDWDLLSSRSVWAFGSSPTHGTNILMDDTLPSEVDKSTLNMCKPSIVQGFQWATREGPLCEEPVRSTKLKILDVALADKAIHRGGGQIIPTARKTVHSSLLTATPRLMEPWYRLQIQCPGEIVNSIQPVLT…	100	0	gi|397645519|gb|EJK76865.1|	hypothetical protein THAOC_01347 [Thalassiosira oceanica]	60.7	0	sp|Q5F3X4|U5S1_CHICK	116 kDa U5 small nuclear ribonucleoprotein component OS=Gallus gallus GN=EFTUD2 PE=2 SV=1	230	1e-64	COG0480	Translation elongation factor EF-G, a GTPase	J	Translation, ribosomal structure and biogenesis	K12852|1|0.0|667|apro:F751_5569| 116 kDa U5 small nuclear ribonucleoprotein component	GO:0006184//GTP catabolic process	GO:0003676//nucleic acid binding;GO:0003924//GTPase activity;GO:0005525//GTP binding	GO:0030529//ribonucleoprotein complex
4	EJK70352.1	hypothetical protein THAOC_08295 [Thalassiosira oceanica]	38438.9	0.068	1	1	0.77	0.074	0.01243	EJK70352.1	MSDSSEDAAATGPVAVAPDVVDVTIHPLVLLSAADHYHRVARGTRKRAVGVLLGSAAQGRVDATNSFAVPFEEDSKNSTVFYLDHNYLENMLHMIRKVHGNERVVGFYSTGPQIRPNDLRIHELVKRFVPANSITPPVFVIIDVRPDRESIPTTAYRVIEEVDSNVPRGGDSSGGAAEVRKTFAHVPSLIGAMEAEEVGVEHLLRDINDPTVSTVANLVKAKLSGLSTLTEKLVEMKDYLTAVSEGRMKPNPEIIANMQAIVNLLPNLNVDELVRSMLVKNNDMQMVIYLSALIRCVIALHDLVVNKIAYNDEVGDGMGGEPKDGKKKPAGKDSEEEKKEDDGDTKKKVSKK	100	0	gi|397631953|gb|EJK70352.1|	hypothetical protein THAOC_08295 [Thalassiosira oceanica]	52.82	2e-102	sp|Q9C774|PSD7B_ARATH	26S proteasome non-ATPase regulatory subunit 7 homolog B OS=Arabidopsis thaliana GN=RPN8B PE=1 SV=1	-	-	-	-	-	-	K03038|1|2e-104|312|crb:CARUB_v10014227mg| 26S proteasome regulatory subunit N8	GO:0051788//response to misfolded protein;GO:0006635//fatty acid beta-oxidation;GO:0043161//proteasome-mediated ubiquitin-dependent protein catabolic process;GO:0009407//toxin catabolic process;GO:0048825//cotyledon development;GO:0080129//proteasome core complex assembly;GO:0051510//regulation of unidimensional cell growth;GO:0010564//regulation of cell cycle process;GO:0042023//DNA endoreduplic…		GO:0005737//cytoplasm;GO:0008541//proteasome regulatory particle, lid subcomplex;GO:0005634//nucleus
5	EED89861.1	predicted protein [Thalassiosira pseudonana CCMP1335]	61980.4	0.021	1	2	0.65	0.078	0.005444	EED89861.1	MGRFTTPIVCLLALLLQSTHGFSPAGRTGSLVCPVSTASSSVRFANKYDGKRSRLYMSEGGEAAALPPKKGFLEKIKSSMPPAKERKKLVPLAMMFFFILFNYTILRDTKDVLMVTAKKSGAEVIPFIKTYVNLPAAIGFTALYSKLCDKMEQKDVFYACTVPFLIFFLAFAFVIFPNVGALHPHAFVDKIALALPEGFGAPLAIVRNWSFAVFYVMAEMWGSVVASLLFWSFANEVTTVDEAKKYYPLFGLGANVALIFSGQYVRFVSKMRAGLPPGVDPWGVSLKYLMGAVVASGGCLISIFSYMQRKVMTDPECVDQEKQAAKKKKKRVKMGLRESAKFLMSSPYIKDLAMLVISYGMCINLVEVSWKSKLKAAYPDPNAYSAFMGNFSSATGSVT…	100	0	gi|224007411|ref|XP_002292665.1|	predicted protein [Thalassiosira pseudonana CCMP1335]	58.39	7e-180	sp|Q39002|TLC1_ARATH	ADP,ATP carrier protein 1, chloroplastic OS=Arabidopsis thaliana GN=AATP1 PE=1 SV=2	518	2e-178	COG3202	ATP/ADP translocase	C	Energy production and conversion	K03301|1|0.0|613|gsl:Gasu_18950| ATP:ADP antiporter, AAA family	GO:0006810//transport	GO:0005471//ATP:ADP antiporter activity;GO:0005524//ATP binding	GO:0016021//integral component of membrane;GO:0009536//plastid
6	EED89177.1	RL6, ribosomal protein 6, partial [Thalassiosira pseudonana CCMP1335]	19595.4	0.079	1	2	0.78	0.092	0.02283	EED89177.1	PSKGKSARYYPADDIPRPKHSRAKKHNAPKVRASLTPGTVCILLSGRFRGKRVVCLKALESGLLLVTGPYKINGVPLRRVNQAYVIATSTKVDVSGADVSKIDDAYFARVKSDSAEGEEEFFANDAAKPAVVSDQRKADQKKVDAAILKAVESTPLMKNYLGSNFSLKKHDRPHEMIF	100	1e-128	gi|224008965|ref|XP_002293441.1|	RL6, ribosomal protein 6 [Thalassiosira pseudonana CCMP1335]	56	2e-61	sp|P34091|RL6_MESCR	60S ribosomal protein L6 OS=Mesembryanthemum crystallinum GN=RPL6 PE=2 SV=1	52	1e-07	COG2163	Ribosomal protein L14E/L6E/L27E	J	Translation, ribosomal structure and biogenesis	K02934|1|1e-67|208|sind:105175445| large subunit ribosomal protein L6e	GO:0006412//translation	GO:0003735//structural constituent of ribosome	GO:0022626//cytosolic ribosome;GO:0043231//intracellular membrane-bounded organelle;GO:0016020//membrane;GO:0044446//intracellular organelle part
7	EJK48998.1	hypothetical protein THAOC_32164 [Thalassiosira oceanica]	50983.7	0.073	1	1	0.78	0.105	0.03052	EJK48998.1	MANKAAKPQSKPQNHRSRISTVSIENYVETIADKHSSKKRKAENGEAEDSGGAQPMIEPSKHTPKLDTSNWPLLLKNYSDLHIRTSHYTPIPCGSSPLARNLKDHISSGVINLDKPANPSSHEVVSWIKRILRVEKTGHSGTLDPKVTGCLIVCVDRATRLVKAQQSAGKEYIGVVRLHSAIDDNKKLHRAVETLTGALFQRPPLISAVKRQLRIRTIYESKLIEYDDQRNLGIFWVSCEAGTYVRTLCVHLGLLVGTGGHMQELRRVRSGVMAEKDNLVTMHDVMDAQHVFDTTKDEKYLRRVVMPLEVLLTNYKRVVVKDSAVNAICYGAKLMIPGLLRFADDIDINQEVVLMTTKGEAIAVGIAQMTTAVMATCDHGVVAKIKRVIMERDTYPRRW…	100	0	gi|397574046|gb|EJK48998.1|	hypothetical protein THAOC_32164 [Thalassiosira oceanica]	73.18	0	sp|Q9LD90|CBF5_ARATH	H/ACA ribonucleoprotein complex subunit 4 OS=Arabidopsis thaliana GN=CBF5 PE=1 SV=1	285	1e-91	COG2016	Predicted ribosome-associated RNA-binding protein Tma20, contains PUA domain	J	Translation, ribosomal structure and biogenesis	K11131|1|0.0|593|cvr:CHLNCDRAFT_37236| H/ACA ribonucleoprotein complex subunit 4 [EC:5.4.99.-]	GO:0001522//pseudouridine synthesis;GO:0006396//RNA processing	GO:0009982//pseudouridine synthase activity;GO:0003723//RNA binding	GO:0030529//ribonucleoprotein complex
8	EED96133.1	predicted protein, partial [Thalassiosira pseudonana CCMP1335]	8709.09	0.125	7	16	2.35	0.792	0.01713	EED96133.1	RTTPRDARFPTQNQANHCWNRYNEWLVCLKSTQDEEGCKAMRNMAVKICPTIWTDKWDEERGEGIYPGIKTD	100	3e-49	gi|223993617|ref|XP_002286492.1|	predicted protein [Thalassiosira pseudonana CCMP1335]	38.89	2e-13	sp|P14854|CX6B1_HUMAN	Cytochrome c oxidase subunit 6B1 OS=Homo sapiens GN=COX6B1 PE=1 SV=2	-	-	-	-	-	-	K02267|1|1e-17|74.3|bpg:Bathy06g00710| cytochrome c oxidase subunit 6b		GO:0004129//cytochrome-c oxidase activity	GO:0005739//mitochondrion
9	EED89940.1	RS2, ribosomal protein 2 [Thalassiosira pseudonana CCMP1335]	28822.3	0.252	2	6	0.6	0.064	0.002514	EED89940.1	MSEERGGFGRGRGERGRGRGRGDRGRGRGRGRGREGGRDENVWVPVTKLGRLVKEGKIGSIEEIFLFSIPVKEAEIIDYFLKDKLQDEVMKIMPVQKQSSAGQRTRFKAFVAVGDAAGHIGLGVKCSSEVATAIRGAILAAKLNIAPVRRGYWGRKASAPHTVPTKVTGKCGSVRVRLIPAPRGTGLVSSPAGKRLLSMAGIEDCYTSTRGHTRTMGNFIKALFYALRNTYGYLEPDLWKENVLTAAPFQEHTDFLSKKQIK	100	3e-163	gi|224007569|ref|XP_002292744.1|	RS2, ribosomal protein 2 [Thalassiosira pseudonana CCMP1335]	72.69	8e-116	sp|P31009|RS2_DROME	40S ribosomal protein S2 OS=Drosophila melanogaster GN=RpS2 PE=1 SV=2	186	3e-57	COG0098	Ribosomal protein S5	J	Translation, ribosomal structure and biogenesis	K02981|1|3e-112|327|csl:COCSUDRAFT_64056| small subunit ribosomal protein S2e	GO:0006412//translation	GO:0003735//structural constituent of ribosome;GO:0003723//RNA binding	GO:0005730//nucleolus;GO:0005886//plasma membrane;GO:0005618//cell wall;GO:0022627//cytosolic small ribosomal subunit;GO:0009507//chloroplast
10	XP_002289138.1	ATP synthase [Thalassiosira pseudonana CCMP1335]	40062.7	0.109	2	10	0.57	0.1	0.007521	XP_002289138.1	MKFLVVAVSALATASAFTTSPASFTTVSSPSVNNVFGQEGNAHRNRRATIVMDGKANAIRDRITSVNNTKKITSAMKLVAAAKVRRAQDSVLATRPFSETLQSVFGGLINRLGGEAADLPLLTQREVNKVTITVITGDRGLCGGYNSFMIKKAEARYKELTAQGIECDFILIGKKGASYFARREYPIRKVFDCGQNPNSKEALAISEEIINSFLSGETDAVELLYTKFVSLIASSPSVRTLVPFSASEISQKGDEVFQLTSQDGDFGVERKELEVAEPQDFPNDMIFEQDPLQIVNSILPLYLNGQILRTLQESVASELAARMQSMQSASDNAKALAKRLSQEYNRARQAAVTQEILEIVSGATALE	100	0	gi|223998931|ref|XP_002289138.1|	ATP synthase [Thalassiosira pseudonana CCMP1335]	84.23	0	sp|Q06908|ATPG_ODOSI	ATP synthase gamma chain, chloroplastic OS=Odontella sinensis GN=ATPC PE=1 SV=1	355	1e-120	COG0224	FoF1-type ATP synthase, gamma subunit	C	Energy production and conversion	K02115|1|1e-139|402|ccp:CHC_T00008719001| F-type H+-transporting ATPase subunit gamma	GO:0042777//plasma membrane ATP synthesis coupled proton transport	GO:0046933//proton-transporting ATP synthase activity, rotational mechanism;GO:0005524//ATP binding;GO:0046961//proton-transporting ATPase activity, rotational mechanism	GO:0045261//proton-transporting ATP synthase complex, catalytic core F(1);GO:0009535//chloroplast thylakoid membrane;GO:0005886//plasma membrane
11	EJK53022.1	hypothetical protein THAOC_27607 [Thalassiosira oceanica]	72379.3	0.038	2	4	0.74	0.055	0.00391	EJK53022.1	MSSTGGRGRSSGTYRGGGGRGRSYRGGRGRGRGRGRGLGGGPYGGRGEHSAGENGDATPQAGFDPNVPKSGGDNGGSHDELVDLLRRLDGKSYPAYHDIESSTRGWANDDDGYTLYVARAQSDPFAKPTRCRVIVKGDTAKFPTVSYQNRIRTVALSDFLNRMFYDCCRTMGADVGYAKGGGWGGPKGGDIDIAKPTQHVVEQSAVRVLQNGDVCAQFTVNLPARGRSIQGLKAVEIFGRTLPELVRKALVYTSLDAQVVTRHVLNVEDQEWVRSCLEMQGLVAFVPDGATLPRKSGADDTPMEDGGGESSESDNGGAQSGGGGGGGSRLVHFQSPESLRVSFDLPNMGKTLSGIGIQKGVTLITGGGFHGKSTVLAALQVGMYNKVPGDGREFCVCSA…	100	0	gi|397584604|gb|EJK53022.1|	hypothetical protein THAOC_27607 [Thalassiosira oceanica]	27.4	5e-12	sp|Q59022|Y1628_METJA	Uncharacterized protein MJ1628 OS=Methanocaldococcus jannaschii (strain ATCC 43067 / DSM 2661 / JAL-1 / JCM 10045 / NBRC 100440) GN=MJ1628 PE=4 SV=1	465	2e-155	COG3044	Predicted ATPase of the ABC class	R	General function prediction only	-	-	-	-
12	EJK62163.1	hypothetical protein THAOC_17238 [Thalassiosira oceanica]	93256.7	0.041	1	2	0.7	0.07	0.005356	EJK62163.1	MADEQVNVPDNANKKKRRAKRSRKKKDPAKTVCKFYLQGKCTRGSDCRFLHPDPETQSLPVEPVSSEVEPTTPADRAPEEEGGQSAVPQLDSLDNVDKIPSKEDLNQETQSSDQFVTPKATMARKRKNKKGGNKKKRSQGGSGNLDKAAAKANAAVAEEPKVEVKDEDEAVEVAKVAKEDVVAKEDVVATKKPPTPEKKESAGILGGMYNMATSLLSPKKIALPPGLERSMDLFTPEQQALAKKLCELPGTTSQCHLFEGWSSDPSDNDKKKAMMAKLEMVDASYADGGLVGYLSNAVNLLERSRRGENPLEGWTPSVPQGEAFEVGTAEFLEAEGIGLGEVGKCGFVLVAGGLGERLGYGDIKIGLPTELATGTLYIQFYVETILAFQSRYAEGKKLP…	100	0	gi|397613341|gb|EJK62163.1|	hypothetical protein THAOC_17238 [Thalassiosira oceanica]	46.61	4e-168	sp|Q5W915|USP_PEA	UDP-sugar pyrophospharylase OS=Pisum sativum GN=USP PE=1 SV=1	405	7e-130	COG4284	UDP-N-acetylglucosamine pyrophosphorylase	G	Carbohydrate transport and metabolism	K12447|1|1e-178|531|bpg:Bathy17g01210| UDP-sugar pyrophosphorylase [EC:2.7.7.64]	GO:0008152//metabolic process	GO:0016779//nucleotidyltransferase activity	-
13	EED91213.1	hypothetical protein THAPSDRAFT_35135, partial [Thalassiosira pseudonana CCMP1335]	43884	0.039	1	1	0.55	0.073	0.002756	EED91213.1	ISLSSKAARHQRKLELEKKMNDAGLTNDEKKARRKELEKEETRVQKESRRNVTTADFESLTVIGRGAFGEVRLVRRKPGNARGETGVYALKSMKKEMMVIKNQVGHVRAERDALAAADDENRWLTLLHYSFHDEQNLYMVMEFLPGGDLMSLLMKEDTFSEEATRFFMAEASHAISCVHALGYIHRDIKPDNMLLDARGHLRLTDLGLCKKVGDVISANAHHLRDMSIDEEGAKTKAEETIPTGGSAPEELRTGKARRENAYSTVGTPDYIAPEVLAAQNGASGYSYTSAVDWWSLGVIMYECLVGYTPFYADDPVTTCRKILKWRQTLEIPAEVRSKLSNECIDFLSCLLAGPESRIGSRADVVRHPWFDDFDWDNLDKMEGPLLP	100	0	gi|224002869|ref|XP_002291106.1|	hypothetical protein THAPSDRAFT_35135 [Thalassiosira pseudonana CCMP1335]	46.3	6e-92	sp|Q2LZZ7|TRC_DROPS	Serine/threonine-protein kinase tricorner OS=Drosophila pseudoobscura pseudoobscura GN=trc PE=3 SV=1	96.3	1e-19	COG0515	Serine/threonine protein kinase	T	Signal transduction mechanisms	K08790|1|1e-96|301|sita:101764976| serine/threonine kinase 38 [EC:2.7.11.1]	GO:0006468//protein phosphorylation	GO:0005524//ATP binding;GO:0004674//protein serine/threonine kinase activity	-
14	EJK67362.1	hypothetical protein THAOC_11616 [Thalassiosira oceanica]	78524.9	0.029	1	2	0.5	0.036	0.0002992	EJK67362.1	MDGVGGGDVDGMAEAMEDLSLEEENKSEMTHLWDMTRPLVGNVSKIEFLKFDDDGDAKTTFWHSSAHILGEALEHVFGSRLTIGPPLAGGFYYDSFMGDAESGGALTESDYKIVEQEFQKIVKSKQKFERLVVTKDEALEMFEGNPFKTQIISTKVPDGSRTTVYRCGDLVDLCRGPHLPHTGRVKAFAATRHSATNWLGDTDNDMLQRMYGISFPDKKMLKVWKENQEKVRINHLLAYESSLLWMEIGRGPTQTYHCVGCFRNSCTTRPHAQLLIPIQAKERDHRRIAAKQDLIMFHDLSAGSAFWLPHGARIYNKLCDFIRSHYWKRGFTEVITPNVYNLDLWNTSGHAQHYKDAMFCFDVEGKEWAMKPMNCPGHCLMFGSKLRSYRDLPIRYADF…	100	0	gi|397624370|gb|EJK67362.1|	hypothetical protein THAOC_11616 [Thalassiosira oceanica]	52.94	0	sp|Q9D0R2|SYTC_MOUSE	Threonine--tRNA ligase, cytoplasmic OS=Mus musculus GN=Tars PE=1 SV=2	494	1e-165	COG0441	Threonyl-tRNA synthetase	J	Translation, ribosomal structure and biogenesis	K01868|1|0.0|696|sind:105160513| threonyl-tRNA synthetase [EC:6.1.1.3]	GO:0006435//threonyl-tRNA aminoacylation	GO:0004829//threonine-tRNA ligase activity;GO:0005524//ATP binding	GO:0005737//cytoplasm
15	XP_002297180.1	predicted protein [Thalassiosira pseudonana CCMP1335]	88041.2	0.014	1	1	0.69	0.127	0.02767	XP_002297180.1	MGGHFNGSHRNDADSSGAPSATNGGVGGNTSNGSSDKRRKRKNKKRVSFNPSMEIPASPSATNNELGVTSSSAAGASTSCLSRFSHGRRNGATNTGGAASTHRGKRQQQYLQSKYSKHSKQQNTKTQTFLLLIAVFITVPKLLLGGVGRYCGREGVALVVQVATHDTDGLDNNAGVGSLLQEVIEWKRQFIIHREQQQQQQQHTQTHDRKQYNQQRQQQHRQLKEQTCQVASLALGNYAYYMPFGRFFLGLQQRKSTAGGTNNDESKQATTSELQQMEKEATTKKKRGILQRVVDSHRSRREERKAKKMQKRQQSQQPLVVEEMERQRHPLRHILEEALAFSHWKKMQKELHHRERIEQQQKQQLAGELQPPKEEIEVDWNKWKYAMSDDYDLPSDQSS…	100	0	gi|224015038|ref|XP_002297180.1|	predicted protein [Thalassiosira pseudonana CCMP1335]	34.34	8e-10	sp|P49193|RALB_TODPA	Retinal-binding protein OS=Todarodes pacificus PE=1 SV=2	-	-	-	-	-	-	K14399|1|4e-09|63.9|csl:COCSUDRAFT_47181| polyribonucleotide 5'-hydroxyl-kinase [EC:2.7.1.78]	-	-	-
16	EJK74654.1	hypothetical protein THAOC_03654 [Thalassiosira oceanica]	9800.18	0.311	2	3	0.61	0.175	0.03686	EJK74654.1	MKSGEIYRGLLLNAEDTMNMTLSEVVRTGRNGQVTKHSTVYLRGSGIRFIALPDLLRNAPAFKKVASMKAKMEAERAANASAGAKRKRDG	100	9e-42	gi|397641451|gb|EJK74654.1|	hypothetical protein THAOC_03654 [Thalassiosira oceanica]	51.61	1e-17	sp|O44437|SMD3_DROME	Small nuclear ribonucleoprotein Sm D3 OS=Drosophila melanogaster GN=SmD3 PE=1 SV=1	-	-	-	-	-	-	K11088|1|4e-20|81.3|cre:CHLREDRAFT_187682| small nuclear ribonucleoprotein D3			GO:0031981//nuclear lumen
17	EED91192.1	hypothetical protein THAPSDRAFT_262874, partial [Thalassiosira pseudonana CCMP1335]	141576	0.016	2	2	0.81	0.076	0.01985	EED91192.1	NGLLRKTEHYDKDERYMAISDLCEALKRNAAHANTEENATSSAGVPPIDSQTERRICSAVLSLLDDSSNDVQTVAVKALGVLLITVQEEQVVEIADRLRTLVLDESKSDLRDVYAIGLKTLVETVPVSMGNVVSHRLIGRLMEGIHSNTATAATGTEDKSSEEIVVACLNVLTDLLTRFGSRSNSITLQHDPLLNCTLSQLASSRPVVRKRAGTTIGVLATVISDDLLHQLVDRLLEQIDQAEGLGNDLRSADTRSLIRTMCTVSGTVGHRLNQGHVDRIVPIFLRFCDPDDALRESCFAGFESFVLRCPALIQPHLGQIVHSALAYMRFDPNYSYGDEDDIIEEDAEDEEEDYGDDEEDEYSDESMSDEEDDENWKVRRSAIRTLTAVVEASRHDPSK…	100	0	gi|224002827|ref|XP_002291085.1|	hypothetical protein THAPSDRAFT_262874 [Thalassiosira pseudonana CCMP1335]	31.72	1e-138	sp|Q6ZQ38|CAND1_MOUSE	Cullin-associated NEDD8-dissociated protein 1 OS=Mus musculus GN=Cand1 PE=1 SV=2	-	-	-	-	-	-	K17263|1|1e-140|463|smo:SELMODRAFT_165037| cullin-associated NEDD8-dissociated protein 1	-	-	-
18	XP_002295558.1	protein translocase complex subunit [Thalassiosira pseudonana CCMP1335]	52618.7	0.063	3	4	0.57	0.131	0.01718	XP_002295558.1	MRFLHLIRPMMCVLPEVQNPDRKIPFREKVLWTTITLFIFLVCCQIPIYGVQSAKSSDPFYWMRVILASNRGTLMELGISPIVTSGLVMQLLAGSRIIEVNYNVKEDRALFAGAQKLFGILITVGEAIAYVVSGMYGDLGSIGAGNALLIIAQLFCSGLIVLTLDELLQKGYGLGSGISLFIATNICENIVWKAFSPTTINTGRGTEFEGAIIALFHLLITRNDKVRAIKEALNRQNLPNLTNLAATMFVFVVVIYFQGWRVVLPVKYQKYRGQEGTYPIKLFYTSNMPIILQTALVSNLYFVSQLLYNRAPTNILVRILGKWQDVEGGGQTIPVGGIAYYISPPTSFAEIIYDPFHAVFYLVFILTACALFSKTWIEVSGASARDVAKQLRDNQMVMK…	100	0	gi|224011567|ref|XP_002295558.1|	protein translocase complex subunit [Thalassiosira pseudonana CCMP1335]	70.13	0	sp|Q54XK2|SC61A_DICDI	Protein transport protein Sec61 subunit alpha OS=Dictyostelium discoideum GN=sec61a PE=3 SV=1	316	3e-101	COG0201	Preprotein translocase subunit SecY	U	Intracellular trafficking, secretion, and vesicular transport	K10956|1|0.0|739|smo:SELMODRAFT_271933| protein transport protein SEC61 subunit alpha	GO:0015031//protein transport	GO:0015450//P-P-bond-hydrolysis-driven protein transmembrane transporter activity	GO:0005886//plasma membrane;GO:0016021//integral component of membrane;GO:0005739//mitochondrion
19	XP_002297003.1	predicted protein, partial [Thalassiosira pseudonana CCMP1335]	33702.8	0.075	2	3	0.79	0.102	0.0346	XP_002297003.1	QTLPHGHLDYVLDMAFDYYGRRFATASGDRTVRVWDLNGDGTTNEWQAHRGAVHRISWAHPEFGQLLATAGAGEYATSRWVNKATLSDARRAVTTVEFAPRHLGLRLASGSADGVVRIYEALDTMNLNHWKLDGRNSGLDGNVSSNENMGVSSLSWCTGRFEPPTLVTGFSSGRVSIYRYDDGQRSWLEYIRLPSHATASGVPRGVLDVAWAPNVGRSYHLIASCGKDNQLKVHRVKRGRGNKGDAEGASSSSLVYEGTEVLDRTQAWRIQWNVTGTVLASSGDGGVVKLWKSDFQGRWKCVSEI	100	0	gi|224014682|ref|XP_002297003.1|	predicted protein [Thalassiosira pseudonana CCMP1335]	37.69	3e-68	sp|Q5U4Y8|SEH1_XENTR	Nucleoporin SEH1 OS=Xenopus tropicalis GN=seh1l PE=2 SV=1	64.3	1e-09	COG4249	Uncharacterized protein, contains caspase domain	R	General function prediction only	K14004|1|4e-37|137|csl:COCSUDRAFT_22211| protein transport protein SEC13	-	-	-
20	XP_002296702.1	predicted protein [Thalassiosira pseudonana CCMP1335]	25251.8	0.044	1	1	0.43	0.192	0.02667	XP_002296702.1	MAASTEHWSEDLFGPKILKKPKTTGVPTVSALKGKKLVALYFSASWCPPCKSFTPLLIDFYNANKEDLEIIFLSSDRDEESFNGYFGKMPWLSSIPGYSSQEANGRQKKLASMFQIQGIPSLIILDAKTGNFITDNARITVMQASNPTSKKELLQTWLTTEAVPIDDAVMGASNGGGGVGSWIGSILMFFARKPMYLFGLLYFAKQGLRYLERLGQEEEGEGDGKEEL	100	9e-137	gi|224014078|ref|XP_002296702.1|	predicted protein [Thalassiosira pseudonana CCMP1335]	47.32	4e-25	sp|Q7Y0F2|NRX12_ORYSJ	Probable nucleoredoxin 1-2 OS=Oryza sativa subsp. japonica GN=Os03g0405900 PE=2 SV=1	83.6	2e-18	COG0526	Thiol-disulfide isomerase or thioredoxin	O	Posttranslational modification, protein turnover, chaperones	K17609|1|9e-31|121|cre:CHLREDRAFT_182094| nucleoredoxin [EC:1.8.1.8]	-	-	-
21	EJK61374.1	hypothetical protein THAOC_18152 [Thalassiosira oceanica]	41022	0.038	1	1	0.79	0.027	0.0007561	EJK61374.1	MLRFSPLYSFASSRPRNARKREKQTNKHRKVASLKQQIEDVRQQKQSSSMGAVAASKGPLREIRKPIKMRRTLKGHFGKVYAMHWASDSQTLVSASQDGKLIIWNAYTTNKVQAIPLRSSWVMTCAFEQTKGDLIACGGLDNVCSIYNINQQTANARATTELVAHDGYLSCCRFIDEGHILTSSGDSSCIYWDVSSGDVLKTFTDHTSDVMSVAVSPNNPSVFVTGSVDTTAKIWDLRNAKCVQTHTGHDQDINTVAWFPDGNAFSTGSDDSSCRLFDMRSYGEVNKFKSDKISCGITSVAFSKSGRLLFGGYDDFNTYVWDTLSDSAQPMALPNPHENRVSCLGMNAKGDALCTGSWDTNLKIWA	100	0	gi|397611547|gb|EJK61374.1|	hypothetical protein THAOC_18152 [Thalassiosira oceanica]	54.9	2e-137	sp|P17343|GBB1_CAEEL	Guanine nucleotide-binding protein subunit beta-1 OS=Caenorhabditis elegans GN=gpb-1 PE=1 SV=2	151	4e-39	COG2319	WD40 repeat	R	General function prediction only	K04536|1|1e-107|323|cic:CICLE_v10028655mg| guanine nucleotide-binding protein G(I)/G(S)/G(T) subunit beta-1	-	-	-
22	XP_002287516.1	metalloprotease, partial [Thalassiosira pseudonana CCMP1335]	62125.8	0.386	4	7	0.66	0.095	0.009826	XP_002287516.1	RYSDFLKLVNGDKIEKVTFSADGTQLLGVDTDGTRIKLEALPNDPDLLTQLTSHKVDVTVLPSNEAAGGLGDLAQSLILPAALFAGLFFLSRRAGGGAGMGGMGGPGNPMGMGKSKAQIQMIPDTGVNFEDVAGCDGAKLELAEVVDFLKQPEVYSKNGCRIPRGVILDGPPGTGKTLLAKAVAGEAGVPFISISGSEFVEMFVGVGASRVRDVFSQAKKNAPCIIFIDEIDAVGRQRGAGFAGGNDEREQTINQILVEMDGFDGNPGIITIAATNRVDILDQALLRPGRFDRKITVDLPDFKGRTRILGVHARGKPLEPDVDLEAIGRRTPGFSGAQLENLMNEAAISAARIGKSTIGWEQIDGAVDRIMVGLEKKGGTAMLSAKQNELVAYHEAGHA…	100	0	gi|223995685|ref|XP_002287516.1|	metalloprotease [Thalassiosira pseudonana CCMP1335]	58.48	0	sp|P72991|FTSH3_SYNY3	ATP-dependent zinc metalloprotease FtsH 3 OS=Synechocystis sp. (strain PCC 6803 / Kazusa) GN=ftsH3 PE=1 SV=1	660	0	COG0465	ATP-dependent Zn proteases	O	Posttranslational modification, protein turnover, chaperones	K03798|1|0.0|732|ccp:CHC_T00009248001| cell division protease FtsH [EC:3.4.24.-]	GO:0030163//protein catabolic process;GO:0006508//proteolysis;GO:0006200//ATP catabolic process	GO:0008270//zinc ion binding;GO:0004222//metalloendopeptidase activity;GO:0016887//ATPase activity;GO:0005524//ATP binding	GO:0016020//membrane;GO:0009507//chloroplast;GO:0009579//thylakoid
23	EED92716.1	casein kinase-like protein [Thalassiosira pseudonana CCMP1335]	37347.9	0.271	7	16	0.67	0.093	0.01022	EED92716.1	MQSSISKYRITKRVGGGSFGDIYLGVGANGEKVAVKFEKHGARCPQLRHEYKVYRELQNAPGFAKVHYFGTQDSYNLMVMDLLGPSLEDQFNKCGRRFSLKTVLMIADQMLERVELMHSRHLIHRDIKPANFVTDGGRGSGNFIYCIDFGLSKRYRHPRTLQHIPQREGRSLTGTPRYASINNHLGVEQSRRDDLESIGYVLVYFLKGGLPWQGLKAKSATKKYKLIMEKKQSITIPALCQGCPSQFAEYLAYCRSLKFEAKPNIAYLRGMFRDLFRSQGYTNNNSSLDWDWNRIDTGTGADGRDRVAAPPGDMGGYGGDVGVDKGRY	100	0	gi|223999013|ref|XP_002289179.1|	casein kinase-like protein [Thalassiosira pseudonana CCMP1335]	55.97	6e-115	sp|Q6QNM1|KC1_TOXGO	Casein kinase I OS=Toxoplasma gondii PE=2 SV=1	87.8	1e-17	COG0515	Serine/threonine protein kinase	T	Signal transduction mechanisms	K02218|1|9e-115|338|cre:CHLREDRAFT_137286| casein kinase 1 [EC:2.7.11.1]	GO:0006468//protein phosphorylation;GO:0048856//anatomical structure development	GO:0004674//protein serine/threonine kinase activity;GO:0005524//ATP binding	GO:0044424//intracellular part
24	CAA04403.1	fucoxanthin chlorophyll a/c binding protein, partial [Cyclotella cryptica]	20937.6	0.131	2	13	0.72	0.138	0.03589	CAA04403.1	GSAVAFAPAATRASSSGLNAFSAADLPGALPPVGFFDPLGFAEKADEKTLKRYREAEVTHGRVAMLAVIGFLVGEAVEGSSFLFDAQISGPAITHFTQVPDGWDALIVTFIGAAEAQRAQIGWVDPADASYDQPGLLRDNYYPGDIGFDPLGLKPEDPEELNIMITKELQNGRLAMLAAAGFLAQEAVDGKGILEHFSS	100	6e-142	gi|2996375|emb|CAA04403.1|	fucoxanthin chlorophyll a/c binding protein, partial [Cyclotella cryptica]	48.35	2e-45	sp|Q03965|L181_CHLMO	Chlorophyll a-b binding protein L1818, chloroplastic OS=Chlamydomonas moewusii GN=L1818 PE=2 SV=1	-	-	-	-	-	-	K08907|1|2e-55|179|cre:CHLREDRAFT_184730| !K08908|3|2e-19|86.7|cit:102607051|	GO:0009765//photosynthesis, light harvesting		GO:0016020//membrane;GO:0009507//chloroplast
25	XP_002291480.1	RS26, ribosomal protein 26 40S small ribosomal subunit, partial [Thalassiosira pseudonana CCMP1335]	11060	0.223	2	2	0.66	0.12	0.01834	XP_002291480.1	NHGRNKHGRGHVKRVRCASTGKAIPKDKAIKRFIVRNIVDASSLRDIKEASAYQEYQLPKLYLKMYYCVEAAVHQRIVRGRSREARRIRTPPER	100	2e-63	gi|224003617|ref|XP_002291480.1|	RS26, ribosomal protein 26 40S small ribosomal subunit [Thalassiosira pseudonana CCMP1335]	63.83	5e-42	sp|Q9UTG4|RS26B_SCHPO	40S ribosomal protein S26-B OS=Schizosaccharomyces pombe (strain 972 / ATCC 24843) GN=rps2602 PE=3 SV=1	55.8	8e-10	COG4830	Ribosomal protein S26	J	Translation, ribosomal structure and biogenesis	K02976|1|2e-41|135|sly:101247310| small subunit ribosomal protein S26e	GO:0006412//translation	GO:0003735//structural constituent of ribosome	GO:0005840//ribosome
26	XP_002293562.1	hypothetical protein THAPSDRAFT_264005, partial [Thalassiosira pseudonana CCMP1335]	27709.5	0.033	1	1	0.65	0.079	0.005563	XP_002293562.1	RNSIRIEGRRRFNRGLFIIDLRHMPAGCGTWPAFWLTDEANWPVNGEIDIVEGVNYQDTAKTALHTTKECRMDDVPEGSKTGTWDTADCFVYDPHQWINQGCVASDLKLEGRSLGVPLNGNGGGVYALEWDPSNRHIRTWVFSPHGRVPKNLLAPDTTRWGLPYGHFPIGDGTNCPSEHFRNMRLVINLAFCGSVAGTRYFMDCPKQFKKFKTCEKWVNSDPDELKEAYWKIRGVYVYE	100	3e-170	gi|224009207|ref|XP_002293562.1|	hypothetical protein THAPSDRAFT_264005 [Thalassiosira pseudonana CCMP1335]	41.39	2e-43	sp|D4AJR9|EGLX_ARTBC	Endo-1,3(4)-beta-glucanase ARB_04519 OS=Arthroderma benhamiae (strain ATCC MYA-4681 / CBS 112371) GN=ARB_04519 PE=3 SV=1	57.8	6e-08	COG2273	Beta-glucanase, GH16 family	G	Carbohydrate transport and metabolism	-	GO:0005975//carbohydrate metabolic process	GO:0004553//hydrolase activity, hydrolyzing O-glycosyl compounds	-
27	EED90360.1	predicted protein [Thalassiosira pseudonana CCMP1335]	96933	0.009	1	1	0.49	0.126	0.01163	EED90360.1	MTTLTLFILSVVCLLSEVSSASSACGIGRHHHRATGRRASVGLMQPSSSSPSTTTATITAFASSPFTDPSISSAVLSSRRPRVEAAHQQQQVHRRHTPAFDDLCLSAIANRASSSFDGDNNSVNHRRQERGNPIRWARNKARSLRSKFTNINNNAAAAIININNNAKSNANKRKRRRVMSTNKLDLLPSFKPSQRRLPYGLLFAFATLFLTHTPLLSLLPAHASGGMPKRNPDAPIVPLTTNELASKLTIWLGIFTLLALLHAAEIAITTLYPWKVREFAEEEEKQRSASGGSSGSSNGKRVRRGTFQALNEDITRVLTTILVTSTACSIYATTLFTHLADHIFGTYAEKWSAIFLTAVTLFFVELLPKNIGVINAEKVARLMVPPINVLANVVGPFGF…	100	0	gi|224006850|ref|XP_002292385.1|	predicted protein [Thalassiosira pseudonana CCMP1335]	38.49	6e-44	sp|Q9LK65|Y3307_ARATH	Putative DUF21 domain-containing protein At3g13070, chloroplastic OS=Arabidopsis thaliana GN=CBSDUFCH1 PE=4 SV=1	266	2e-78	COG1253	Hemolysin or related protein, contains CBS domains	R	General function prediction only	K16302|1|6e-11|69.3|zma:100283152| metal transporter CNNM			GO:0009941//chloroplast envelope
28	EJK63740.1	hypothetical protein THAOC_15587 [Thalassiosira oceanica]	33924.8	0.044	1	2	0.78	0.067	0.009622	EJK63740.1	MKVLSTTTVAIIAGASSAGAFAPGAARTRASTCSSSSSRLQMNQVPFFASETEEKEEAATEVEEVAAAPAPVEPVSTVDTVAEALADAARVEAENAKLDALSTEEEIELMVANEMSKTKKASKLKNAAAGVEYAPWMRISEADEEKIRVVMKERTEARRKRQEQARDVTGNLFRDSQAQELSGTGLTYKLFDGDVELSWATKSERNTKGFTIKRRRAKTDEFTTLVSYEDYGPLASKGDEGGIYKYLDTTAGPGGWVYRITEEDTFGGSADICQALVEVETEEEQQAALFAAAGFGLFAVLAVVGGIMVDPMGGY	100	5e-132	gi|397615960|gb|EJK63740.1|	hypothetical protein THAOC_15587 [Thalassiosira oceanica]	-	-	-	-	-	-	-	-	-	-	-	-	-	-
29	ABK20847.1	preprotein translocase subunit A (chloroplast) [Thalassiosira pseudonana]	101445	0.096	1	1	0.78	0.077	0.01515	ABK20847.1	MLKNPFIKDSGLNQYQPLINQINALETNLKTLTDTELRNKTFELKKRYQEEQDLNALTAEAFAITREASFRTLGLRHFDVQLIGGLVLNSGKISEMRTGEGKTLVATLPAYLNALTDKGVHIVTVNDYLASRDQISMGQIYRFLGLDTGLIQEDMAFLERQQNYKAEITYVTNNEVAFDYLRDNMASNLSQVVLPPFNYCIVDEVDSIFIDEAQVPLIISQAVETCIDKYIVAAEVAEYLEVNVHFKVDEKNRNIILTEQGTAQIEKILQVEDLYNPNDPWIPYILSAIKATALFFRNVHYIVQNNQIIIVDEFTGRIMPDRRWNEGLHQAVEAKEGVPIRQNTETAASITYQNFFLLYPKLSGMTGTAKTSEVEFEKIYNLPVEEIPTARPNLRKDLP…	100	0	gi|118411176|ref|YP_874570.1|	preprotein translocase subunit A [Thalassiosira pseudonana]	100	0	sp|A0T0V8|SECA_THAPS	Protein translocase subunit SecA OS=Thalassiosira pseudonana GN=secA PE=3 SV=1	866	0	COG0653	Preprotein translocase subunit SecA (ATPase, RNA helicase)	U	Intracellular trafficking, secretion, and vesicular transport	K03070|1|0.0|790|cit:102630213| preprotein translocase subunit SecA	GO:0017038//protein import;GO:0065002//intracellular protein transmembrane transport;GO:0006605//protein targeting	GO:0005524//ATP binding	GO:0005886//plasma membrane;GO:0009570//chloroplast stroma;GO:0009535//chloroplast thylakoid membrane
30	AIR75860.1	photosystem II CP43 chlorophyll apoprotein (chloroplast) [Roundia cardiophora]	52050.2	0.202	7	31	0.52	0.156	0.0202	AIR75860.1	MKISYSLRRYYHVETPFNSSIAGRDIESTGFAWWSGNARLINVSGKLLGAHVAHAGLMVFWAGAMVLFEVSHFVPEKPLYEQGFICIQHLATLGYGIGPGGEITSTVPYFAVGVIHLISSAVLGFGGIYHSLLGPDTLEESFPFFGYDWRDKNKMTTILGIHLCLLGLGSLLLVAKAMYLGGIYDTWAPGGGDVRYITTPTLNPIVIFGYVFRSPFGGDGWVVSVNNMEDLVGGHIWVGVLCIVGGVWHIFTKPFSWARRAFVWSGEAYLSYSLAAISLMGFTASLYSWYNNTAYPSELYGPTGPEASQSQAFTFLVRDQRLGANVSSAQGPTGLGKYLMRSPSGEIIFGGETMRFWDLRAPWVEPLRGPNGLDINKIKNDIQPWQERRAAEYMTHAPL…	100	0	gi|700658182|ref|YP_009093187.1|	photosystem II CP43 chlorophyll apoprotein (chloroplast) [Roundia cardiophora]	96.18	0	sp|P49472|PSBC_ODOSI	Photosystem II CP43 reaction center protein OS=Odontella sinensis GN=psbC PE=3 SV=1	-	-	-	-	-	-	K02705|1|0.0|746|ccp:CHC_210|	GO:0009772//photosynthetic electron transport in photosystem II;GO:0018298//protein-chromophore linkage	GO:0045156//electron transporter, transferring electrons within the cyclic electron transport pathway of photosynthesis activity;GO:0016168//chlorophyll binding	GO:0030076//light-harvesting complex;GO:0009523//photosystem II;GO:0016021//integral component of membrane;GO:0009535//chloroplast thylakoid membrane
31	XP_002288335.1	hypothetical protein THAPSDRAFT_268475 [Thalassiosira pseudonana CCMP1335]	103336	0.011	1	1	0.73	0.117	0.0274	XP_002288335.1	MPSTVKVRIKAARNLASLNPAAITTTRATPSNGTTNRSALPIPISPRSSTAPVVILPDAYVTVSLGGHSAVAEYDEDDEPLVSAERSGTHHSRTASKFQQWQGMLGTSGDTSGGAGDDSAQIGASGGGSTRTSRCYSARTRTVRRSVNPAFNEEFRFEVADDTLLQDEPLLFHVREGGGQHGSIGLVYVDLNPLLTRTARSLSVGEKGGNESTSGDVVLSGLSSGVIDGWFPLYDTLGGVRGELELSIKLNFIGDVNPFRDSSAGVQLFPFSTLDPNSGYTVAHVFGFVEELVVADDPEFEWNDNFNQARTSHETRQTLMYLLDAKVRRRMCKKVLELGGNAVLGYHQNFDMEGDSGLVARTFGTCVLIQKKEIVQLASSDRRNNKSISNEHDDRALVS…	100	0	gi|223997324|ref|XP_002288335.1|	hypothetical protein THAPSDRAFT_268475 [Thalassiosira pseudonana CCMP1335]	31.7	2e-94	sp|Q86YS7|C2CD5_HUMAN	C2 domain-containing protein 5 OS=Homo sapiens GN=C2CD5 PE=1 SV=1	-	-	-	-	-	-	-	-	-	-
32	EJK77849.1	hypothetical protein THAOC_00289 [Thalassiosira oceanica]	128480	0.007	1	1	0.81	0.058	0.009524	EJK77849.1	MEAVLEAERLVKEATEASDRSRQEFIDELDAEKEKIASRFEALEARKRALAEQWGNPDASPDDWVEVNCGGRVIAARRGTLCQLEGTNFGAVFSGVYEKKLPRDREGRIFLDLCPDEFQSIIDYLNELSISSPDDLPTIHCPRRPLNEWLAEEGMDGHLKLIYESENFSASEFYEHCRDVPHTVIVVETECGLKIGGYSSTPWTGDTSGWTRSEAFLFVLQRRDGCFKARPCFKAKLADDREKAIYQRDDGPHFGNDLYISDSGVYIQYRTAPKYESHQLGTLSTRGRNPYIIKKIKVYKVVESNDSTEEGSPAAVSIEPATSFAPQINQALNKTVESLNEALGQVERMETSLEDENAFVDILVRGNDCNDLVKLNVSGTTMMTHRSTLLQVKDSVLAS…	100	0	gi|397647779|gb|EJK77849.1|	hypothetical protein THAOC_00289 [Thalassiosira oceanica]	-	-	-	-	-	-	-	-	-	-	-	-	-	-
33	EJK47404.1	hypothetical protein THAOC_33876 [Thalassiosira oceanica]	38919.3	0.049	1	3	0.63	0.15	0.02716	EJK47404.1	MLNLPPPLPPPPPIGKDAVNGYIDGLQSKISDLESELREFKPEESPQDSTSSAVADEGEEDADMPPMYSGDGSSDDFDKATEAKMAASDLKSSGNYAEALEKYTEAVLAAEPSALLLANRATCLFKLGKYAAAARDCDAALSRNPDSAKSLRIRGEVNLKLEKYHEARKDLSASQAIDWDSEAGQMLKEATTKCAEMDAAKVKERNDEEEKKQEKLRKKAEEIRKAQEEAKREAEEEKRKSSGGMGGMGGIGGMPGMGGMGGMGGMAGVMNDPEIIAGLQNPKVMAAMSEMMSGGAPNPAKMMELMSDPEVGPVLQKIMSKVGGGGGMGGMPGMGGGFGGSSGAGGGDFDEMPEMDDDSDDDDLPDLVD	100	3e-148	gi|397570676|gb|EJK47404.1|	hypothetical protein THAOC_33876 [Thalassiosira oceanica]	38.46	3e-12	sp|Q93YR3|F10AL_ARATH	FAM10 family protein At4g22670 OS=Arabidopsis thaliana GN=At4g22670 PE=1 SV=1	-	-	-	-	-	-	K09560|1|2e-15|80.5|bpg:Bathy18g01110| suppressor of tumorigenicity protein 13	-	-	-
34	CAI44219.1	fucoxanthin chlorophyll a/c binding protein, partial [Cyclotella cryptica]	3421.61	0.312	1	3	0.37	0.182	0.02321	CAI44219.1	MSRSIPFLTVPEKLDGSMPGDMGFDPMGLSDI	100	6e-15	gi|84871814|emb|CAI44219.1|	fucoxanthin chlorophyll a/c binding protein [Cyclotella cryptica]	-	-	-	-	-	-	-	-	-	-	K08907|1|4e-09|51.6|ccp:CHC_T00008505001|	-	-	-
35	EJK56278.1	hypothetical protein THAOC_23874 [Thalassiosira oceanica]	44336	0.204	2	4	0.58	0.118	0.01232	EJK56278.1	MATTVQAQGVDKYYSSKIGDLSSTIEERTSDLQRLKAQRNELNAKVRMLREELYHLQEPGSYVGEVIKQMGQKKVLVKINPEGKYVVDIDKDIDINDLKPNTRVALRNDSYTLHKILPTKVDPLVSLMKVEAVPDSTYDMIGGLEKQVMEIKEVIELPIKHPELFESLGVAQPKGVLLYGPPGTGKTLLARAVAHHTDCTFIRVSGAELVQKYIGEGSRMVRELFVMAREASPSIIFMDEIDSIGQSRGGGGSGGGDSEVQRTMLELLNQLDGFEPAQNIKVIMATNRIDILDAALLRPGRIDRKIEFPNPNAENREAIMKIHSSKMNLLRNIDLSTIAEKMGNASGAECKAVCTEAGMFALRERRVHVTQEDFEMAVSKVMKKEGESNMSLQRLWK	100	0	gi|397594574|gb|EJK56278.1|	hypothetical protein THAOC_23874 [Thalassiosira oceanica]	78.54	0	sp|Q9C5U3|PRS8A_ARATH	26S proteasome regulatory subunit 8 homolog A OS=Arabidopsis thaliana GN=RPT6A PE=1 SV=1	361	2e-121	COG1222	ATP-dependent 26S proteasome regulatory subunit	O	Posttranslational modification, protein turnover, chaperones	K03066|1|0.0|610|nnu:104595314| 26S proteasome regulatory subunit T6	GO:0030163//protein catabolic process	GO:0005524//ATP binding;GO:0017111//nucleoside-triphosphatase activity	GO:0005737//cytoplasm;GO:0000502//proteasome complex
36	EED96589.1	predicted protein, partial [Thalassiosira pseudonana CCMP1335]	35038.2	0.041	1	2	0.82	0.061	0.01301	EED96589.1	MGFLRQGIATTQFFLFGKKHCTQTGYINHIKQYTEPVQSATIVDANDPNNDGVDLSGKTFIISGANQGIGKEIATYVASKNAKVYMLCRSKERAEDAQKEIQSSTNNQNINVLLGDVSEPSHIRRVVSEFEDKEGKLDCLVCNAGALFNERTVNSDGMEVTFMAHLACGSYQLTKLLLPSLKKASSDGGEARVVYVSSGGMYNTKFPDWDVATSTGEYESKFNGNMAYAYAKRGQVLLAEQFTKQYPEISFVSSHPGWVKTSGVDAAYGSQAKYLEPMRTLWEGSEGICWLTTTSKKNLEGGAFYLDRQPQTKHI	100	0	gi|223994529|ref|XP_002286948.1|	predicted protein [Thalassiosira pseudonana CCMP1335]	34.43	7e-45	sp|A0PJE2|DHR12_HUMAN	Dehydrogenase/reductase SDR family member 12 OS=Homo sapiens GN=DHRS12 PE=2 SV=2	163	7e-45	COG3427	Carbon monoxide dehydrogenase subunit G	C	Energy production and conversion	K11168|1|6e-54|182|egu:105040303| dehydrogenase/reductase SDR family member 12 [EC:1.1.-.-]	GO:0055114//oxidation-reduction process	GO:0016491//oxidoreductase activity;GO:0000166//nucleotide binding	-
37	EED87535.1	predicted protein [Thalassiosira pseudonana CCMP1335]	56684	0.037	2	3	0.55	0.112	0.009532	EED87535.1	MNNISGPGRRSAMSSVDFYRRVPKDLTEATSLGAIMSICAITVMAILFFSETLAFARTAMVTSIALDENDQPQIRLNFNITLMDLHCDFVSVDVWDTLGTNRQNVTKNIEKWQLDEDGQRRIFSGRNREQREVVHEEHEETLEELHEDGEQAVELHPENFKAFLEGHDMAFIDMYAPWCIWCQRLHPTWEKFGEKVHELGMPVGVGKVDCVVHAQLCKDEKVMAFPTLRWYKDGEAILPDYKMDRTVDALVGYAKRKLDMEQKYKDWESKNAGGNADARGKPRGGTSRPEHPGCQVSGHLMVNRVPGNFHIEAKSVNHNLNAAMTNLTHRVNHLSFGEPITKLPPHMENTPFMRKVKRVLKQVPEEHKQFNPMDDTEYVTAQFHQAFHHYIKVVSTHLN…	100	0	gi|224013158|ref|XP_002295231.1|	predicted protein [Thalassiosira pseudonana CCMP1335]	30.12	7e-69	sp|Q9T042|PDI54_ARATH	Protein disulfide-isomerase 5-4 OS=Arabidopsis thaliana GN=PDIL5-4 PE=2 SV=1	63.2	2e-10	COG3118	Negative regulator of GroEL, contains thioredoxin-like and TPR-like domains	O	Posttranslational modification, protein turnover, chaperones	K20367|1|7e-96|300|ccp:CHC_T00009222001| endoplasmic reticulum-Golgi intermediate compartment protein 3	GO:0045454//cell redox homeostasis	GO:0003824//catalytic activity	-
38	XP_002290050.1	hypothetical protein THAPSDRAFT_262381, partial [Thalassiosira pseudonana CCMP1335]	8601.27	0.187	2	3	0.81	0.067	0.01482	XP_002290050.1	QKRSPSDFLKAVLGRPVNVRLNTGTDYRGVLACLDGYMNIAMEQTEEYVDGQLKSKYGDCFIRGNNVMYISSQKR	100	2e-50	gi|224000756|ref|XP_002290050.1|	hypothetical protein THAPSDRAFT_262381 [Thalassiosira pseudonana CCMP1335]	78.67	2e-41	sp|P62313|LSM6_MOUSE	U6 snRNA-associated Sm-like protein LSm6 OS=Mus musculus GN=Lsm6 PE=1 SV=1	59.3	7e-12	COG1958	Small nuclear ribonucleoprotein (snRNP) homolog	K	Transcription	K12625|1|7e-40|129|osa:4335668| U6 snRNA-associated Sm-like protein LSm6	-	-	-
39	XP_002289814.1	RL18a, ribosomal protein 18a 60S large ribosomal subunit [Thalassiosira pseudonana CCMP1335]	21099.9	0.077	1	5	0.57	0.111	0.01095	XP_002289814.1	MTVAGAMRQYQVVGRKAGTDENPNPEAYRMIIFAPNPTVAKSKFWYFMRQFRKMKKTTGEILDCVEIIEKNSRTVKNYGIWLRYDSRSGTHNMYREYRDLKLTGAISQLYDEMAGRHRTRPRSIQIIRTATLGAGELKRPNGAQFAQAKVKFPLPHRVDSAKRGQKALSDRTFSTVRPTTYFG	100	1e-136	gi|224000283|ref|XP_002289814.1|	RL18a, ribosomal protein 18a 60S large ribosomal subunit [Thalassiosira pseudonana CCMP1335]	53.85	4e-67	sp|Q7ZWJ4|RL18A_DANRE	60S ribosomal protein L18a OS=Danio rerio GN=rpl18a PE=2 SV=1	-	-	-	-	-	-	K02882|1|4e-59|185|sind:105167545| large subunit ribosomal protein L18Ae	GO:0006468//protein phosphorylation;GO:0006412//translation	GO:0003735//structural constituent of ribosome;GO:0004672//protein kinase activity;GO:0005524//ATP binding	GO:0005840//ribosome
40	EJK62995.1	hypothetical protein THAOC_16373, partial [Thalassiosira oceanica]	5776.16	0.218	1	4	0.74	0.112	0.02983	EJK62995.1	MIRPTIVRQAERLVNRNPLLYGPGPVARRATGIGAMDPLKGLVVCAGQAMAVGLA	100	1e-31	gi|397614758|gb|EJK62995.1|	hypothetical protein THAOC_16373, partial [Thalassiosira oceanica]	-	-	-	-	-	-	-	-	-	-	-	-	-	-
41	EJK73051.1	hypothetical protein THAOC_05350, partial [Thalassiosira oceanica]	17448.3	0.054	1	1	0.65	0.102	0.0112	EJK73051.1	MLSLHVGRRRETVPVLLPRRKGKGKVAIAFIDLVLAPAGEYLPFLLHASHTLAAGVGVEAQRVPSAFAPPGGARVTEAQLAPPRAALAVRPGIPVHRAMAQVGGAKQILALPDEGTGRGGPAEAGGDAVYVSRVGFRGDDSRVGFQGEDGRCSRALLFDDVARSEMK	100	2e-89	gi|397638393|gb|EJK73051.1|	hypothetical protein THAOC_05350, partial [Thalassiosira oceanica]	-	-	-	-	-	-	-	-	-	-	-	-	-	-
42	XP_002289836.1	predicted protein [Thalassiosira pseudonana CCMP1335]	45090.1	0.092	3	3	0.7	0.045	0.001477	XP_002289836.1	MTTAPACSDLQKKTALNGQYPPVPSVCVVTGGTGFVGMRLVEMLVERGAKKVISFDVVPPPKDAWKHPNIEWRVGDISDKAAVDELLSTPDIGCVWHNAAAVGPYHPKDLYFRVNYEGTLNVIDSAKKHGVSKIVFSSSPSTRFTGEDVDGLTEDEMPKLPLDKYMQTYAETKALGEMAITKACTNEFMTVAVAPHQVYGPRDNLFLPNLLEAAMNGKLRIFGEGHNRICFTHVDNYCHGLIIAEKALYPNSPALGKFYIVTDGTTHPLGNQYLIFWKELDEAVVGMGIPSLWSKAHLPKPLLLFVAAICDLFGKLFGITTKLNTFSVVVLTMHRWFDIKAAETDLKFKPIIGYSEGWKETIVWFRENWLPEQKKSPNSLFGIAKTTQKKIDIQDESSK…	100	0	gi|224000327|ref|XP_002289836.1|	predicted protein [Thalassiosira pseudonana CCMP1335]	30.06	2e-35	sp|Q3ZBE9|NSDHL_BOVIN	Sterol-4-alpha-carboxylate 3-dehydrogenase, decarboxylating OS=Bos taurus GN=NSDHL PE=2 SV=1	149	8e-40	COG0451	Nucleoside-diphosphate-sugar epimerase	M	Cell wall/membrane/envelope biogenesis	K07748|1|4e-34|135|eus:EUTSA_v10011495mg| sterol-4alpha-carboxylate 3-dehydrogenase (decarboxylating) [EC:1.1.1.170]	GO:0006694//steroid biosynthetic process;GO:0055114//oxidation-reduction process	GO:0000166//nucleotide binding;GO:0003854//3-beta-hydroxy-delta5-steroid dehydrogenase activity	-
43	EJK55422.1	hypothetical protein THAOC_24853 [Thalassiosira oceanica]	9512.36	0.092	1	1	0.54	0.137	0.01685	EJK55422.1	MGQRGQLLGDKYKVKSIPTLVLLDEVGNVITADARNKIPADKAGIGFPWRSPMSVLISTLVPKSFRLMMKNQFLGILGKVKVALKAR	100	8e-57	gi|397591619|gb|EJK55422.1|	hypothetical protein THAOC_24853 [Thalassiosira oceanica]	-	-	-	-	-	-	-	-	-	-	-	-	-	-
44	XP_002287800.1	predicted protein [Thalassiosira pseudonana CCMP1335]	45271	0.019	1	2	0.38	0.171	0.02213	XP_002287800.1	MSSSTAIAIFIAVVLQLFSSQLLPHGPAVDIPPNHGPHLGPDPDPSDTSLQLASGKLAVIRERVEEGMEALIVHPETVIFGDDGTMYVLSEGAKLVMLSDFRQDVKSPSTLTAKAAEVAHLGVGRPLAGKFDSNGCLYYADAILGLARICLPDSMTGNTSTTMKPNVELLASRVQLDDGTWSPISYADDVDIGPKTGHVYFSDASNVRSDRDLSTGIWDIVYASKVEGMRGSMTGRLLRYKPETGKVDVLATGAAFGNGVAVDKDETYVLYTATFDRAVMKYHLTGEKAGQVERILDQFPGILDGADCSHERGTCFVAIPTSIPLLPKIIYSLPSFIGKRLRSLLMLLPRTWTPKPERYGAFAEIHPGDEQSAPSIKRIVQDPDGIDMDMITGVTEYKG…	100	0	gi|223996253|ref|XP_002287800.1|	predicted protein [Thalassiosira pseudonana CCMP1335]	27.52	9e-21	sp|Q4V3D9|SSL10_ARATH	Protein STRICTOSIDINE SYNTHASE-LIKE 10 OS=Arabidopsis thaliana GN=SSL10 PE=2 SV=1	130	1e-32	COG3386	Sugar lactone lactonase YvrE	G	Carbohydrate transport and metabolism	K01757|1|1e-10|66.2|bna:106357261| strictosidine synthase [EC:4.3.3.2]	GO:0009058//biosynthetic process	GO:0016844//strictosidine synthase activity	-
45	XP_002293973.1	26S proteasome regulatory ATPase subunit, partial [Thalassiosira pseudonana CCMP1335]	47614.6	0.162	3	3	0.65	0.026	0.000225	XP_002293973.1	PPPLDSDDIALLKSYGLGPYSVPIKEIEEEIKKHQQTVKDLIGIKESDTGLSQPSQWDLVGDKQMMQEEAPLQVARCTKIIAGEDSHAAGGAAAANNDNPTAQLAGNKYVINVKQFAKFVVGLGEKVAPTDIEEGMRVGVDRAKYSIQIPLPPKIDPTVSLMTVEDKPDVTYEDVGGAKDALEKLREVLETPLLHPERFVALGIEPPKGVLLYGPPGTGKTLTARAVANRTDACFIRVIGSELVQKYVGEGARMVRELFTMARSKRACIIFFDEVDAIGGTRSGSDDNGSDNEVQRTMLQIVTELDGFDARGNIKVLMATNRPDTLDPALLRPGRLDRKVEFGLPDLEGRGHILKIHSKRMNCDRDIRFELVARLCPNTTGAELHSVCTEAGMFAIRAR…	100	0	gi|224010030|ref|XP_002293973.1|	26S proteasome regulatory ATPase subunit [Thalassiosira pseudonana CCMP1335]	77.73	0	sp|Q41365|PRS7_SPIOL	26S proteasome regulatory subunit 7 OS=Spinacia oleracea GN=RPT1 PE=2 SV=1	333	6e-110	COG1222	ATP-dependent 26S proteasome regulatory subunit	O	Posttranslational modification, protein turnover, chaperones	K03061|1|0.0|670|bvg:104899665| 26S proteasome regulatory subunit T1	GO:0030163//protein catabolic process;GO:0006508//proteolysis	GO:0008233//peptidase activity;GO:0005524//ATP binding;GO:0017111//nucleoside-triphosphatase activity	GO:0005737//cytoplasm;GO:0000502//proteasome complex;GO:0005634//nucleus
46	EED87532.1	protoporphyrinogen IX oxidase usually abbreviated, partial [Thalassiosira pseudonana CCMP1335]	55075.1	0.044	2	5	0.83	0.074	0.02363	EED87532.1	DCLVIGGGISGSTLAHNLHSTHSLNILLAEARDYLGGNVQSVQHTDDDGTFIYEKGPNSFATQPSIVRISHELGIEEELVFADESLPPWVNHNGKLHPLPKGKGGKGPKGQIELFGLAGDLLSWPGKIRAGIGAFVGHPAPPTDREETIQDWVTRILGEEVFYRIIDPFVSGVYAGDPNTLSMKAALPKISRIEQYSYDIDWNKFGAIFYGGLARQVELTKERKADPPDANWVDFEYGNPGSYKKGLSTLPNAIKEELGEKVKLEWSLKKVEKVDGGYVATFDTPNGEEKVNAKTVVSTMPTHAIGSILEPVLPGSTDLFSQKGIYYPPVAAVTLAYPKSAFKDVELDNEFGNLKDLPGFGSLNPRTEGVRTLGTLWSSSLFPERCPSDYNILLNYIGG…	100	0	gi|224013152|ref|XP_002295228.1|	protoporphyrinogen IX oxidase usually abbreviated [Thalassiosira pseudonana CCMP1335]	41.67	8e-116	sp|Q9AR38|PPOC_ORYSJ	Protoporphyrinogen oxidase, chloroplastic OS=Oryza sativa subsp. japonica GN=PPOX1 PE=2 SV=1	351	1e-114	COG1232	Protoporphyrinogen oxidase	H	Coenzyme transport and metabolism	K00231|1|3e-119|363|zma:542554| protoporphyrinogen/coproporphyrinogen III oxidase [EC:1.3.3.4 1.3.3.15]	GO:0006779//porphyrin-containing compound biosynthetic process;GO:0055114//oxidation-reduction process	GO:0004729//oxygen-dependent protoporphyrinogen oxidase activity	-
47	EJK47930.1	hypothetical protein THAOC_33313 [Thalassiosira oceanica]	45379.2	0.076	2	4	0.78	0.092	0.02199	EJK47930.1	MGKKAKSSAGKKKAADRKIDRSALPPPPPKPEDEVGSAKPLDKPALPGTGFKVLGEEGYDDGGVADLSLLIDLEDSVQRRKRGENEYFTALKADLLPRATRGPMAKMTRREQKVSLAQLLFSEDDDCEDKGPSEVYVEHNVDDEDETVIKHRSDRLAQARAALRLSLLLREPACASLSLSELCKRKLTQAGKNGAEEALRCANKAIEIAGPGFWDSDEVQLEAEDNPVLDPKYEKNATSPGLANPTTLKLLPIRVSQLCMRSSLLQKGNALAAMGKEDDARAIYEEVFPILESEPRCARVDWERHSVHVNIGNTFAREGNFDKADEHYTIAQQLGEDHVKEKGGSEEDGRSMLLCAKRARAFALKKVGRDDEAKALLAEVIKQKISDDEAAKKKKEEEA…	100	0	gi|397571726|gb|EJK47930.1|	hypothetical protein THAOC_33313 [Thalassiosira oceanica]	-	-	-	-	-	-	-	-	-	-	-	-	-	-
48	EED93059.1	predicted protein [Thalassiosira pseudonana CCMP1335]	24247.1	0.036	1	1	0.6	0.189	0.04265	EED93059.1	MKSSLAFTATLLSSAHAFAPTSQWSRTSVSRNALIDDAFGVTNETGNKIPPLGRYILQDVNEDGIKWWQNAEIKNGRVAMVATIGYLVQKTGVHFPLYMGPNSSSDWLLSSTSGVTFGDVSHANALDTIAMVPSAGWLQVLFAAGLFELTAYKRQWMDGNEIPGDYGYDPLGFTKREGGWNSKELTDLRMKEIKNGRLAMITMAGWLSEESIPGSFPVWHP	100	9e-142	gi|223999699|ref|XP_002289522.1|	predicted protein [Thalassiosira pseudonana CCMP1335]	29.41	5e-14	sp|Q08584|FCPA_PHATR	Fucoxanthin-chlorophyll a-c binding protein A, chloroplastic OS=Phaeodactylum tricornutum GN=FCPA PE=2 SV=1	-	-	-	-	-	-	K08907|1|5e-18|82.4|ccp:CHC_T00009105001|	-	-	-
49	XP_002293634.1	predicted protein, partial [Thalassiosira pseudonana CCMP1335]	37528.1	0.039	1	1	0.77	0.017	0.0001568	XP_002293634.1	NLKSQIEKARASKQNSTMGSIASSKSLRDIRKPPQTKLRRTLKGHFGKVYAMHWNSDSQTLVSASQDGKLIIWNAFTTNKVQAIPLRSSWVMTCAFEQSKGNLIACGGLDNVCSIYNTQQASTSNARASKELVAHDGYLSCCRFVDEGHVVTSSGDSTCIYWDVNSGEVLKTFSDHKSDVMSVAISPENNNIFVSGSVDTTAKVWDIRNGKCVQTHIGHEADINSVAFFPDGHAFGTGSDDASCRLFDMRSYGEVNKFKSDKITCGITSVAFSRSGRLMFGGYDDFNTYVWDTLSDADQCAFALPTPHENRVSCLGVNKNGDALCTGSWDTNLKIWA	100	0	gi|224009351|ref|XP_002293634.1|	predicted protein [Thalassiosira pseudonana CCMP1335]	57.74	4e-139	sp|P17343|GBB1_CAEEL	Guanine nucleotide-binding protein subunit beta-1 OS=Caenorhabditis elegans GN=gpb-1 PE=1 SV=2	157	8e-41	COG3903	Predicted ATPase	R	General function prediction only	K04536|1|2e-104|314|atr:18445842| guanine nucleotide-binding protein G(I)/G(S)/G(T) subunit beta-1	-	-	-
50	EED86130.1	predicted protein [Thalassiosira pseudonana CCMP1335]	54073.9	0.034	1	1	0.58	0.198	0.04556	EED86130.1	MGNGKHIQEAEGSDVRFSDVKGVTEAKAELEEIVLYLKDPERFTRLGGKLPRGLLLTGPPGTGKTLLAKAIAGEAGVPFFFSSGSQFEEVYVGLGAKRIRELFEAAKQKSPSIIFIDEIDAVGGTRKLKDQSALKMTLNELLVQMDGFDENNGIIVIGATNFAESLDSALLRPGRFDKSVVVPLPDVGGRKEILEMYAAKTKVSDDVDLGILARGTTGFSGADLYNLMNQAALKASIDGLDNITMQIFEWAKDKIIMGAERKSAVITPETAKCTAYHEAGHALVGVLTDGARTIHKATIMPRGQALGMVTTLPEGDETSMSLKQMIAMMDVCMGGRVAEELIFGEENVTSGASSDIQYATRIARSMVTKYGFSDDVGIVYYGGETGQDDASGKTRSQID…	100	0	gi|224015872|ref|XP_002297581.1|	predicted protein [Thalassiosira pseudonana CCMP1335]	64.78	2e-174	sp|Q8LQJ8|FTSH5_ORYSJ	ATP-dependent zinc metalloprotease FTSH 5, mitochondrial OS=Oryza sativa subsp. japonica GN=FTSH5 PE=3 SV=1	501	6e-171	COG0465	ATP-dependent Zn proteases	O	Posttranslational modification, protein turnover, chaperones	K08955|1|2e-177|519|sita:101756178|	GO:0009987//cellular process;GO:0006508//proteolysis;GO:0030163//protein catabolic process	GO:0017111//nucleoside-triphosphatase activity;GO:0004222//metalloendopeptidase activity;GO:0005524//ATP binding	GO:0043231//intracellular membrane-bounded organelle;GO:0044444//cytoplasmic part;GO:0016020//membrane
51	EED91201.1	coatomer protein subunit alpha [Thalassiosira pseudonana CCMP1335]	139061	0.132	14	25	0.81	0.101	0.04204	EED91201.1	MLTKFESKSARVKGLAFHPVRPWICASLHNGVIQLWDYRVGTVIDRFEEHDGPVRGVDFHLHEPLIVTGGDDYKIKVWDYKLRRCLFTLLGHLDYIRTVQFHPNATQFPWILSASDDQTLRLWDFHKRSCLSVLTGHNHYVMCAAFHPSEDLIVSASLDQTVRVWDTTGLRKKQLGGSGSAAHATAMNVQAELFGTNDVVVKYVLEGHDRGVNWAAFHPTLPLLASAADDRQVKLWRMSETKAWEVDTLRGHANNVSCCLFHPKQELVVSNSEDRSIRVWDVSKRVGVQTFRREGDRFWILAAHRSQNLLAAGHDSGMIVFKLERERPASANGPGDKLYYVRGRELFCHDYGRATGGSSGVDVPIASLRRVAQTDGIGSGPRFLSYNMHNPKEGNVLVC…	100	0	gi|224002845|ref|XP_002291094.1|	coatomer protein subunit alpha [Thalassiosira pseudonana CCMP1335]	56.78	0	sp|Q94A40|COPA1_ARATH	Coatomer subunit alpha-1 OS=Arabidopsis thaliana GN=At1g62020 PE=2 SV=2	164	5e-39	COG3903	Predicted ATPase	R	General function prediction only	K05236|1|0.0|1043|smo:SELMODRAFT_154977| coatomer subunit alpha	GO:0016192//vesicle-mediated transport;GO:0006886//intracellular protein transport	GO:0005198//structural molecule activity	GO:0030126//COPI vesicle coat
52	sp|A0T0T0.1|PSBD_THAPS	RecName: Full=Photosystem II D2 protein; Short=PSII D2 protein; AltName: Full=Photosystem Q(A) protein	39248.7	0.168	2	14	0.58	0.199	0.04306	sp|A0T0T0.1|PSBD_THAPS	MTIAIGQNQERGLFDLVDDWLKRDRFVFVGWSGILLFPTAYLAAGGWFTGTTFVTSWYTHGLASSYLEGCNFLTAAVSTPANSMGHSLLLLWGPEAQGDFTRWCQIGGLWAFIALHGAFGLIGFCLRQFEIARLVGIRPYNAIAFSGPIAVFVSVFLLYPLGQASWFFAPSFGVAAIFRFLLFLQGFHNWTLNPFHMMGVAGILGGALLCAIHGATVENTLFEDGDAANTFRAFTPTQSEETYSMVTANRFWSQIFGVAFSNKRWLHFFMLFVPVAGLWTSSIGIVGLALNLRAYDFVSQELRAAEDPEFETFYTKNILLNEGIRSWMAAQDQPHENFVFPEEVLPRGNAL	100	0	gi|118411148|ref|YP_874542.1|	photosystem II reaction center protein D2 [Thalassiosira pseudonana]	100	0	sp|A0T0T0|PSBD_THAPS	Photosystem II D2 protein OS=Thalassiosira pseudonana GN=psbD PE=3 SV=1	-	-	-	-	-	-	K02706|1|0.0|684|ccp:CHC_205|	GO:0009772//photosynthetic electron transport in photosystem II	GO:0016491//oxidoreductase activity;GO:0045156//electron transporter, transferring electrons within the cyclic electron transport pathway of photosynthesis activity;GO:0005506//iron ion binding	GO:0030076//light-harvesting complex;GO:0009523//photosystem II;GO:0016021//integral component of membrane;GO:0009535//chloroplast thylakoid membrane
53	EJK66241.1	hypothetical protein THAOC_12850 [Thalassiosira oceanica]	12619.7	0.09	1	6	0.48	0.164	0.01859	EJK66241.1	MTKQNSQPVRLYVNGAILGYKRGLRNQYNHTSLIKIKGVDSKEETQFYLGKRIAYITKAKSSKNGSKFRVNWGRVCRAHGSNGVVKCKFARDLPPQSIGGRVRVMLYPSNV	100	8e-78	gi|397621342|gb|EJK66241.1|	hypothetical protein THAOC_12850 [Thalassiosira oceanica]	56.76	2e-41	sp|Q9FZH0|R35A2_ARATH	60S ribosomal protein L35a-2 OS=Arabidopsis thaliana GN=RPL35AB PE=3 SV=1	55.8	7e-10	COG2451	Ribosomal protein L35AE/L33A	J	Translation, ribosomal structure and biogenesis	K02917|1|8e-48|151|csl:COCSUDRAFT_68044| large subunit ribosomal protein L35Ae	GO:0006412//translation	GO:0003735//structural constituent of ribosome	GO:0005840//ribosome
54	XP_002292096.1	predicted protein [Thalassiosira pseudonana CCMP1335]	11850.2	0.218	3	18	0.57	0.105	0.00838	XP_002292096.1	MAPAGKKAKKNVESMNSRLKLVMKSGKAILGYKSGLKALRTGKSKMVLIASNCPPLRKSEVEYLAMLAKTTVHHYSGDNSELGTACGKLFNCSVVSIIDGGDSDILSSKE	100	1e-74	gi|224006271|ref|XP_002292096.1|	predicted protein [Thalassiosira pseudonana CCMP1335]	60.91	3e-47	sp|Q7S7F1|RL30_NEUCR	60S ribosomal protein L30 OS=Neurospora crassa (strain ATCC 24698 / 74-OR23-1A / CBS 708.71 / DSM 1257 / FGSC 987) GN=rpl-30 PE=3 SV=1	84	1e-20	COG1911	Ribosomal protein L30E	J	Translation, ribosomal structure and biogenesis	K02908|1|4e-48|152|smo:SELMODRAFT_269052| large subunit ribosomal protein L30e	GO:0006412//translation	GO:0003735//structural constituent of ribosome	GO:0022625//cytosolic large ribosomal subunit
55	EJK44381.1	hypothetical protein THAOC_37081 [Thalassiosira oceanica]	12710.1	0.118	1	1	0.58	0.134	0.01682	EJK44381.1	MAAGSTTSIFISSSLVESSLCLPAAAAEGTASGAAEARVANAAGRFDEGERCVNNDNQGDPVGDDPPDVKQTTYLPASIGAEAAAAAAVRGGAAAAAAGAALALRAMPRQHEMLAGAMRRYDDDTAR	100	8e-16	gi|397564872|gb|EJK44381.1|	hypothetical protein THAOC_37081 [Thalassiosira oceanica]	-	-	-	-	-	-	-	-	-	-	-	-	-	-
56	XP_002292528.1	synthase of ATP synthase [Thalassiosira pseudonana CCMP1335]	22558.9	0.144	2	4	0.69	0.154	0.04039	XP_002292528.1	MFSTTLKTTLTTLTRRGLATKAPTNPHKPPLNLYGLNARYANATYIAASKSSTLEKVESELLAIKQTAESSANFRSFLENPLISRNTKTKQVEEMLAGKMSGVTLNLMTTLAGNARLNNIVGITDDYIKLMKANRGEVEATIISAEPLNKTQTEAVATAMKSQFPEGAKVILKSEVDPSIMGGLQIQIGDKFLDLSVGSRIDEVGRTVV	100	1e-134	gi|224007136|ref|XP_002292528.1|	synthase of ATP synthase [Thalassiosira pseudonana CCMP1335]	38.89	2e-38	sp|P48047|ATPO_HUMAN	ATP synthase subunit O, mitochondrial OS=Homo sapiens GN=ATP5O PE=1 SV=1	97.8	6e-24	COG0712	FoF1-type ATP synthase, delta subunit	C	Energy production and conversion	K02137|1|6e-36|128|bpg:Bathy03g02500| F-type H+-transporting ATPase subunit O	GO:0042777//plasma membrane ATP synthesis coupled proton transport	GO:0046933//proton-transporting ATP synthase activity, rotational mechanism;GO:0016787//hydrolase activity	GO:0005886//plasma membrane
57	XP_002287026.1	predicted protein, partial [Thalassiosira pseudonana CCMP1335]	28487.1	0.124	2	8	0.52	0.048	0.0008433	XP_002287026.1	AGALMVAGGLGYGAYNSVFTVDGGHRAVVFNRLLGMKPTIYNEGLNFNIPWFEWPVIYDIRTRPVNLQTLTGSKDLQMVTIGIRVLHRPDPNQLVWIYRHLGLNYDERILPSLMNECAKAVVARYDANELLTKREQVSAAISAELRLRAGGFNVLLEDVAITHLAFSPEYAKAVEAKQVAQQDANRAKYIVLGAQQEKKTIITKARGEAESAELIGSAVRRNPGFMKLRRIDAAKDIADIVAGSGNKVYLNADSLLLN	100	4e-170	gi|223994685|ref|XP_002287026.1|	predicted protein [Thalassiosira pseudonana CCMP1335]	55.47	2e-88	sp|A9UMS3|PHB2_XENTR	Prohibitin-2 OS=Xenopus tropicalis GN=phb2 PE=2 SV=1	134	2e-36	COG0330	Regulator of protease activity HflC, stomatin/prohibitin superfamily	O	Posttranslational modification, protein turnover, chaperones	K17081|1|8e-93|279|gsl:Gasu_02320| prohibitin 2			GO:0016020//membrane
58	EJK72400.1	hypothetical protein THAOC_06073 [Thalassiosira oceanica]	18869.9	0.081	1	2	0.75	0.108	0.02609	EJK72400.1	MDSNSYLKPQNRVENGIPAFDVVFGPAYKGISLGALVCASLYSDFKVETSFAYNRKEAKDHGEGGILVGVSMVGKRVLIVDDVITAGTAIRESHGMLQKIDAKPVGVAIALDRAEKRSLEDPLSAVQAVARDLDIPVVSIVALPQLQEYLKQSPRYDDSVLKQVTEYRSQYGI	100	1e-123	gi|397636744|gb|EJK72400.1|	hypothetical protein THAOC_06073 [Thalassiosira oceanica]	53.94	1e-46	sp|A4VGS1|PYRE_PSEU5	Orotate phosphoribosyltransferase OS=Pseudomonas stutzeri (strain A1501) GN=pyrE PE=3 SV=1	155	1e-46	COG0461	Orotate phosphoribosyltransferase	F	Nucleotide transport and metabolism	K13421|1|4e-07|52.4|mtr:MTR_3g017580| uridine monophosphate synthetase [EC:2.4.2.10 4.1.1.23]	GO:0006207//'de novo' pyrimidine nucleobase biosynthetic process;GO:0009116//nucleoside metabolic process;GO:0006221//pyrimidine nucleotide biosynthetic process	GO:0004590//orotidine-5'-phosphate decarboxylase activity;GO:0004588//orotate phosphoribosyltransferase activity;GO:0000287//magnesium ion binding	-
59	EJK77671.1	hypothetical protein THAOC_00483 [Thalassiosira oceanica]	21420.3	0.118	2	2	0.55	0.056	0.001258	EJK77671.1	MYRVGVFVAFSSFCYWAVTQPSEFDGFVKGQGDFIKDLYAGTLLSDMSQKDKENIDKPKMPSLEDLLKKLDSEDDAEEQELSEEEAAEALLESLVDEEDEEIDEDAEDPGPSLSHSGSLGLSGSLGLGNNSLLPTPGCARVEGVPKLKLDICVAIANSDGGLSSSWYTMLLHQRTHIEFEENAARKVLEGGMVVR	100	8e-37	gi|397647363|gb|EJK77671.1|	hypothetical protein THAOC_00483 [Thalassiosira oceanica]	-	-	-	-	-	-	-	-	-	-	-	GO:0015031//protein transport	GO:0008565//protein transporter activity	GO:0016021//integral component of membrane
60	EED95896.1	adenine nucleotide translocator; ATP/ADP translocase [Thalassiosira pseudonana CCMP1335]	32500.6	0.245	7	18	0.49	0.167	0.02309	EED95896.1	MSDFMINFLAGGVSGAVAKTCTAPIERVKLLIQTQDANPKIISGEVARYTGIVDCFSRVASEQGIGAFWRGNLTNIIRYFPTQAFNFAFKDGIKALFPRADKNTEFAKFFAINMASGGLAGAGSLMIVYPLDYARTRLASDVGSGKQQFSGLADCLKKTVASSGIGGLYNGIGVSIVGIIPYRGVYFGLFDTLSGLNPYQKDTNNMLRAGSKFACAQSSAIAAGYASYPMDTVRRRLQMQSEKPKEEWVYKGTADCFAKIMKDEGTSALFKGAGANALRTVGAAMVLVLYSEITAAVAASKE	100	0	gi|223993143|ref|XP_002286255.1|	adenine nucleotide translocator; ATP/ADP translocase [Thalassiosira pseudonana CCMP1335]	60.48	2e-112	sp|P31692|ADT_PARKE	ADP,ATP carrier protein OS=Parachlorella kessleri PE=3 SV=1	-	-	-	-	-	-	K05863|1|7e-115|337|mis:MICPUN_108589| solute carrier family 25 (mitochondrial adenine nucleotide translocator), member 4/5/6/31	GO:0055085//transmembrane transport	GO:0005215//transporter activity	GO:0005743//mitochondrial inner membrane;GO:0016021//integral component of membrane
61	EJK60671.1	hypothetical protein THAOC_18934 [Thalassiosira oceanica]	34012.9	0.085	1	1	0.46	0.181	0.02472	EJK60671.1	MSLVQTYTEYFEVSPKNGLSQFQTMTAYLGGSAFQTVLDNPVTAYRQLVQQYAKDAAGKAVDPKVATAEATAVFKANPAAAAMSGLIPRIIGVGFKRVPKFGILLGLSFFLGEDGNISATAAFGASVLSAPFINPIRMIEKQQRAFFKTTGAEKPIMEIIRESAKKNFVPLFRGTIPLMGHSCASALLGLAGQPKLQKYIKGELSQHGVGNFTSGLLASAAVTPIYVGVTNPLSRLEVIMQTSRIDGKSIGVVEACREVANDSKQFGLRGVFRGQGLGIAKGILSLTAFHQGRIWLTEAFKNHNISNGSYKPKDVGSA	100	0	gi|397610133|gb|EJK60671.1|	hypothetical protein THAOC_18934 [Thalassiosira oceanica]	-	-	-	-	-	-	-	-	-	-	-	-	-	-
62	YP_009093166.1	RNA polymerase beta (chloroplast) [Roundia cardiophora]	86059.5	0.051	3	4	0.59	0.187	0.03876	YP_009093166.1	MIRSEKEFDYIKIKLASPLRILQWSHRKLPNGQFVGEVQKSETINYRTFKPEMDGLFCERIFGPSKSLECACGKYKRVRYEGLICERCGVELTESRVRRHRMGHINLIYPVTHVWYTNSRPNYIALLLEVEQCEKRLDTGWTEFAYPRDNKEKDIKDITEYKLSNVGCHTYLASPKALLNCKEFLKEKSKAKKSSIVNCYDERIKRIKLASLAYFIAEDEIAFYGLHWDLQQYRRCREFGFTGYPLKPYSQSRNRRRSTPKYLLRATPNYLIGAVLIKRELEKLNLDQEIVKTRNFIMLCSKILHKEQPFYNFSHWSRKWEYQRIYKLRDNSIKRIRILENLLTTGANPAWMIITILPVIPPALRPMIQLEGGRFATSDLNELYRRIITRNNRLLRLLE…	100	0	gi|700658161|ref|YP_009093166.1|	RNA polymerase beta (chloroplast) [Roundia cardiophora]	92.75	0	sp|A0T0R0|RPOC1_THAPS	DNA-directed RNA polymerase subunit beta' OS=Thalassiosira pseudonana GN=rpoC1 PE=3 SV=1	586	0	COG0086	DNA-directed RNA polymerase, beta' subunit/160 kD subunit	K	Transcription	K03046|1|6e-175|518|ccp:CHC_800| DNA-directed RNA polymerase subunit beta' [EC:2.7.7.6]	GO:0006351//transcription, DNA-templated	GO:0003899//DNA-directed RNA polymerase activity;GO:0003677//DNA binding	GO:0009507//chloroplast
63	EJK74080.1	hypothetical protein THAOC_04262, partial [Thalassiosira oceanica]	89318.7	0.062	2	3	0.64	0.126	0.01928	EJK74080.1	RERRKKEKSGQRDKESPEDGVGTGIKEGSAQRPSHPHQGWVRPARPDSESKMMSYLRPKLLCLACRTSVVTNDDGRPSLTRLGAICEQVSELHREGVEVIMVSSGATGMGKRLMRKHCRMSMTISEVTSFGNNLNMLDGSEHSNGNRIRSQSHTLADSKKTYDSACAAAGQFEMMNLYNSLFSQMEVNAAQVLLTSGDFLDESNLKNLRYSIQRLLDVGIIPIINENDAVSANRGYTEGDVFSDNDSMAALCARNFGCDLLILLTDVDGVYDRPPSEEGAKLLPFYSQSQCVGIGEKSKHGRGGMDSKISAAQSAVAPGSQCRACVVLSGTDLNSIRSITSKEHGLKQCETKGTLFVTPKSELEMQAMKEYEEMQSSNAESVSDSARIMATNSRDQARK…	100	0	gi|397640361|gb|EJK74080.1|	hypothetical protein THAOC_04262, partial [Thalassiosira oceanica]	45.71	0	sp|O04226|P5CS1_ORYSJ	Delta-1-pyrroline-5-carboxylate synthase 1 OS=Oryza sativa subsp. japonica GN=P5CS1 PE=2 SV=2	376	5e-121	COG0014	Gamma-glutamyl phosphate reductase	E	Amino acid transport and metabolism	K12657|1|0.0|550|bdi:100822226| delta-1-pyrroline-5-carboxylate synthetase [EC:2.7.2.11 1.2.1.41]	GO:0006561//proline biosynthetic process;GO:0055114//oxidation-reduction process	GO:0004349//glutamate 5-kinase activity;GO:0004350//glutamate-5-semialdehyde dehydrogenase activity	-
64	EJK52617.1	hypothetical protein THAOC_28089 [Thalassiosira oceanica]	88853.2	0.011	1	1	0.7	0.051	0.002227	EJK52617.1	MHAPIRASTTLSSLIRRQVQRRSPVPFNGSPDQSSLLIERQTSVPRINNTSGTSREEILTMKPYSRSFLTAAAAALSRADGNGCSFIRPCAGFRIQPEQTTLSGSRSGLRSSPTHSLAAGAARRRLSTLEMVDSLSMETALPIQDASGEILSVTSTSSSSFVVIKVCEEDVSLPDLRELTADGIGSTDGTVPIVEEDKVELADALFRATKKKSEAKKSSGAFENSRTMELHVCVLCRETHTSLVLAGGDLTGRLITLPNNARGTVVAHRHPIAFVLVDNDGTEPLKTSGQASISKQSTALNPASVPIGSAVDYLGRQVSILSDGSVSRSLPKASTPGLLPEINIETGFGVASGAERPIFVPIPKISEIGLIDSPLVTGITAIDALTPIGKGQNMLVIGQ…	100	0	gi|397583367|gb|EJK52617.1|	hypothetical protein THAOC_28089 [Thalassiosira oceanica]	22.65	6e-20	sp|C5CIV6|ATPA_KOSOT	ATP synthase subunit alpha OS=Kosmotoga olearia (strain TBF 19.5.1) GN=atpA PE=3 SV=1	112	5e-24	COG0056	FoF1-type ATP synthase, alpha subunit	C	Energy production and conversion	K02111|1|2e-20|100|csl:COCSUDRAFT_47874| F-type H+-transporting ATPase subunit alpha [EC:3.6.3.14]		GO:0016787//hydrolase activity	-
65	AIR75846.1	ATP synthase CF1 epsilon subunit (chloroplast) [Roundia cardiophora]	14455.7	0.173	2	9	0.55	0.2	0.03988	AIR75846.1	MVMNIRVLTPDRVICSTTADEVILPGLTGQVGVLDGHATLITALDTGLLRIKLAEKWTPIILCGGLAEIDRNRVTVLVNDVEELISVELDEATKELEKATSAIENAETSKARLDASIELKKATARLEGINYLS	100	1e-89	gi|700658168|ref|YP_009093173.1|	ATP synthase CF1 epsilon subunit (chloroplast) [Roundia cardiophora]	95.49	2e-87	sp|A0T0R7|ATPE_THAPS	ATP synthase epsilon chain, chloroplastic OS=Thalassiosira pseudonana GN=atpE PE=3 SV=1	121	1e-34	COG0355	FoF1-type ATP synthase, epsilon subunit	C	Energy production and conversion	K02112|1|1e-34|129|gsl:Gasu_40560| F-type H+-transporting ATPase subunit beta [EC:3.6.3.14]!K02114|2|4e-33|116|cvr:ChvaP_p079| F-type H+-transporting ATPase subunit epsilon	GO:0042777//plasma membrane ATP synthesis coupled proton transport	GO:0046933//proton-transporting ATP synthase activity, rotational mechanism;GO:0005524//ATP binding;GO:0046961//proton-transporting ATPase activity, rotational mechanism	GO:0045261//proton-transporting ATP synthase complex, catalytic core F(1);GO:0009535//chloroplast thylakoid membrane;GO:0005886//plasma membrane
66	YP_874599.1	50S ribosomal protein L6 (chloroplast) [Thalassiosira pseudonana]	20750.3	0.07	1	1	0.69	0.068	0.00457	YP_874599.1	MSRIGKLPIKLPTTVEISHQSDATVQVINVKGKFGSLQRTLPEELKIEQIHNDNGSSLIVSFENQTRTNKSLQGLYRTLINNMVIGVTEQFVIILTLQGVGYRASVQGKSLVLNLGYSHPVEIDIPEGITVEVTQNTTLNIKACDKEQLGLFAAKVRAWRPPEPYKGKGILYKNEQILRKAGKSGKK	100	7e-135	gi|118411205|ref|YP_874599.1|	50S ribosomal protein L6 [Thalassiosira pseudonana]	100	1e-135	sp|A0T0Y7|RK6_THAPS	50S ribosomal protein L6, chloroplastic OS=Thalassiosira pseudonana GN=rpl6 PE=3 SV=1	182	3e-57	COG0097	Ribosomal protein L6P/L9E	J	Translation, ribosomal structure and biogenesis	K02933|1|1e-56|182|sot:102601925| large subunit ribosomal protein L6	GO:0006412//translation	GO:0003735//structural constituent of ribosome;GO:0019843//rRNA binding	GO:0005840//ribosome;GO:0009507//chloroplast;GO:0005739//mitochondrion
67	XP_002297311.1	photosystem I light harvesting protein, partial [Thalassiosira pseudonana CCMP1335]	15901.9	0.11	1	3	0.5	0.198	0.03389	XP_002297311.1	FDPAGFSERAPEWINWFREAELKHGRQAMLAVVGMVVPEFVRIPGEAFSFEAIPNVLDAHDALLDTSMKQILLWISLMEAMSLGALSNMNEFDREPGNFGFDPLGMMPKDAAKAKEMQLKELKNGRLAMVAIGGMVHGAITTGHG	100	8e-103	gi|224015308|ref|XP_002297311.1|	photosystem I light harvesting protein [Thalassiosira pseudonana CCMP1335]	37.78	2e-15	sp|Q03965|L181_CHLMO	Chlorophyll a-b binding protein L1818, chloroplastic OS=Chlamydomonas moewusii GN=L1818 PE=2 SV=1	-	-	-	-	-	-	K08907|1|4e-31|116|gsl:Gasu_11630|	GO:0009765//photosynthesis, light harvesting		GO:0016020//membrane;GO:0009507//chloroplast
68	XP_002296153.1	cell division control protein, cdc2, cyclin-dependent kinase, cdk1, p34, partial [Thalassiosira pseudonana CCMP1335]	33966.5	0.115	2	5	0.72	0.089	0.01261	XP_002296153.1	YQKIEKPGSNLGEGTYGVVYKARDRQTGETVALKRIRLEVEDEGIPSTALREISLLRELTHENIVDLKDCVQQDGKLYLVFEFLDRDLKKALESYNGLLDPMLVKSYLFQMCRGLAFCHARGVMHRDLKPQNLLVSRNGDLKLADFGLARAFCPPIRPLTHEVVTLWYRPPEILLGSQTYAPPVDVWAIGTIFVEMVTKRPLFPGDSEIDELFKIFRQLGTPNEEVWPGVTALQDWNTAFPTWYKHDFSKVFLDNTDASAVDLLERLLAYSPKDRITAKDTLNHPYFDDLDKENV	100	0	gi|224005004|ref|XP_002296153.1|	cell division control protein, cdc2, cyclin-dependent kinase, cdk1, p34 [Thalassiosira pseudonana CCMP1335]	63.01	3e-130	sp|Q38772|CDC2A_ANTMA	Cell division control protein 2 homolog A OS=Antirrhinum majus GN=CDC2A PE=2 SV=2	122	1e-29	COG2815	PASTA domain, binds beta-lactams	M	Cell wall/membrane/envelope biogenesis	K02206|1|2e-131|377|mus:103970292| cyclin-dependent kinase 2 [EC:2.7.11.22]	GO:0007049//cell cycle;GO:0006468//protein phosphorylation;GO:0051301//cell division	GO:0005524//ATP binding;GO:0004693//cyclin-dependent protein serine/threonine kinase activity	-
69	EJK71517.1	hypothetical protein THAOC_07036 [Thalassiosira oceanica]	18252.2	0.095	1	1	0.77	0.097	0.02473	EJK71517.1	MNSVWDSYVGGQDFKGGEWKWDPLKLSETYEPLVPFFREAELRHGRTAMLAVVGFIATDFVRLPGEAFSFESIPTTVGAHDALTGTALQQVAMWIGVFDTIVTAPAIAATMKGERDAGDFGIKGPKNDPDGSKMKRKQVSELLNGRLAMMAVGGIATQSVLTGHGFPYL	100	2e-122	gi|397634632|gb|EJK71517.1|	hypothetical protein THAOC_07036 [Thalassiosira oceanica]	31.9	2e-11	sp|Q08584|FCPA_PHATR	Fucoxanthin-chlorophyll a-c binding protein A, chloroplastic OS=Phaeodactylum tricornutum GN=FCPA PE=2 SV=1	-	-	-	-	-	-	K08907|1|3e-22|92.0|gsl:Gasu_11610|	-	-	-
70	EED88754.1	tom40-like protein, partial [Thalassiosira pseudonana CCMP1335]	30792.7	0.039	1	1	0.48	0.177	0.02468	EED88754.1	SSCPNPGPLEAATWDVRRLVSLDTYDGVRVDISKQLSPYFAVVHSFHLGTSMLPDGRTSSYGFTTQMNDEEGFCMARVDPERGTMDGRIHKALFGGVAMAKLQVGTSSEGSNDQLLGEIDLGAQTWTANLKYGSMGGGNVFGCNYFQSVTPRLAMGGEGMYIGANGNMMSSYTAKYSFNPSNSGDGDERQGMLSLNYKRAITPSRVNIGASLECSPATLESQVMVGAEFNLTRSKMNVCVDGTGRIQSTLEAKLGREQGSPSLNFAAELDHGKSLMRFGYGLNIG	100	0	gi|224009574|ref|XP_002293745.1|	tom40-like protein [Thalassiosira pseudonana CCMP1335]	25.08	1e-18	sp|Q9LHE5|TO401_ARATH	Mitochondrial import receptor subunit TOM40-1 OS=Arabidopsis thaliana GN=TOM40-1 PE=1 SV=3	-	-	-	-	-	-	K11518|1|1e-27|112|olu:OSTLU_34552| mitochondrial import receptor subunit TOM40	GO:0055085//transmembrane transport;GO:0044070//regulation of anion transport	GO:0008308//voltage-gated anion channel activity	GO:0005741//mitochondrial outer membrane
71	EJK58851.1	hypothetical protein THAOC_20986 [Thalassiosira oceanica]	25171.1	0.063	1	1	0.44	0.105	0.005882	EJK58851.1	MQTSSSWSDRISFSNATNRPSQSEVGEAGMEVSRKQRKLCATHRRYEDPKPWSLGDGGEKDTEEIPDIWYPSLVGRKLPIFWEATMAGVQPLSKKTCVKKRTKKFARHQSDLFVRIRNSSWRKPKGIDGRVRRRFKGALPMPSIGYGSNKKTRNVLPCGFKSVVVANVSELEMLMMHNRTYAATVAHSVSSRVRRQIVERAEQLAIRVTNAAAKLRAEEDA	100	3e-155	gi|397605017|gb|EJK58851.1|	hypothetical protein THAOC_20986 [Thalassiosira oceanica]	62.96	1e-49	sp|P62912|RL32_RAT	60S ribosomal protein L32 OS=Rattus norvegicus GN=Rpl32 PE=1 SV=2	83.6	8e-19	COG1717	Ribosomal protein L32E	J	Translation, ribosomal structure and biogenesis	K02912|1|3e-48|158|cre:CHLREDRAFT_191758| large subunit ribosomal protein L32e	GO:0006412//translation	GO:0046872//metal ion binding;GO:0003735//structural constituent of ribosome	GO:0005840//ribosome
72	EED88785.1	predicted protein [Thalassiosira pseudonana CCMP1335]	69519	0.023	1	1	0.79	0.035	0.001669	EED88785.1	MAPPPGPLGSASAPTDDSDLEELISSPMSKNVKMVDLDSLTGDNANGGARSGGGFMNPLYVLTGACQLCLYTLGPRTSKCLLYTSVFLLLAVLSNTLFNPTAPTGIMGADYSAITSAYDLSLAKVHHWCIAGDNDSCKCEDPLEPTSRMEFKSWNAAHKANVADVNLYRAMYGNEPTMIDADSGRPRPPIDVAFLGESVVEAMDGRWLGKHVVTKNNGDDKKKPKIDKTFEKFFRKEKGAPVEGVALGIAGDGASNVLWRIQHDEMPYDFNPKVWWITLGMNDLTRMQCSEEIVVLGILRVVEEIRLRKPDAKIVINSLLPMVDFQDNGEVKMADFADFEGKDESKGEKYRKREVPSTFKVGGGNDDDEAGEEKRGERPKPKDGKGRKLKAHSQQRDTK…	100	0	gi|224009636|ref|XP_002293776.1|	predicted protein [Thalassiosira pseudonana CCMP1335]	28.8	1e-07	sp|Q15102|PA1B3_HUMAN	Platelet-activating factor acetylhydrolase IB subunit gamma OS=Homo sapiens GN=PAFAH1B3 PE=1 SV=1	63.2	1e-09	COG2755	Lysophospholipase L1 or related esterase	E	Amino acid transport and metabolism	-		GO:0016787//hydrolase activity	-
73	XP_002289774.1	hypothetical protein THAPSDRAFT_22248 [Thalassiosira pseudonana CCMP1335]	84327.2	0.062	3	8	0.76	0.107	0.02675	XP_002289774.1	MNEHWDVTSSEEASGTRLSFHCWPSSRLEATRCVAPIGSLITPLKKLPPTCSPPTSLQYDPIRCSTATCHAVLNPYCQVDFRTKLWVCPFCLTRNHFPPHYAENISEQNLPAELIPQFATCEYELPSVPPAGPPAFVFCIDTCAHVEELAELADSIQQILNLLPEDSLVGLITFGTNVQVHELGFEGLPKAYVIRGNKEYGPAKFGQLLGCGGAAAAGGNVLRRFLLPVSECAMTLESILDDLRKDPWPVPSDKRVARCTGCALSVATSLLDLALPRRGARVMMFVGGPCTSGPGAIVSRLKTEDMRSHADLARNAEPLHKPACEFYASLAKRHAVGSQGGKGNQVGVLEMGELVEATGGLMVLGDSFGQSVFKESLRRVFQTFDADVPEDGGKMQMAF…	100	0	gi|224000203|ref|XP_002289774.1|	hypothetical protein THAPSDRAFT_22248 [Thalassiosira pseudonana CCMP1335]	50.76	0	sp|Q4PE39|SEC23_USTMA	Protein transport protein SEC23 OS=Ustilago maydis (strain 521 / FGSC 9021) GN=SEC23 PE=3 SV=1	-	-	-	-	-	-	K14006|1|0.0|759|ppp:PHYPADRAFT_107601| protein transport protein SEC23	GO:0006886//intracellular protein transport;GO:0006888//ER to Golgi vesicle-mediated transport	GO:0008270//zinc ion binding	GO:0030127//COPII vesicle coat
74	XP_002296064.1	dynamin GTPase, switch/motor protein [Thalassiosira pseudonana CCMP1335]	76237.1	0.029	2	4	0.73	0.045	0.001986	XP_002296064.1	MEGLIPIASKLQDVLGALGQNTNLDLPQIVVIGGQSSGKSSVLESVVGRSFLPRGTGIVTRRPLVLQLFNTSGKRHPKNDATSSSTEPVEEWGEFLHQPGKRYTDFSQIRSEISRDTNRLCSGPNSKGVSSTPIHLKIYSPRVLSLTMVDLPGLTKVAVKDQPEDIEEQIYQINVQYGSNPNAILLAVTGANTDLASSDALKLARELDPRGERTIGVLTKLDLMDPGTDAGEILHNKVIPLRRGYVAVVNRGQRDIDADLSIQVGLRNEERYFRTHPVYSRDRSLVGKCGTMNLARNLNGILIHHIRECLPELKIRIGNMMGDVQSELDALGMPEGSGDEPGALGGKLLGLLSKFSSNFAAMIDGRANELYGGARISFIFHQVFARSLNSVGAFDGLSE…	100	0	gi|224004826|ref|XP_002296064.1|	dynamin GTPase, switch/motor protein [Thalassiosira pseudonana CCMP1335]	45.77	0	sp|Q7SXN5|DNM1L_DANRE	Dynamin-1-like protein OS=Danio rerio GN=dnm1l PE=2 SV=1	-	-	-	-	-	-	K17065|1|5e-180|533|jcu:105637524| dynamin 1-like protein [EC:3.6.5.5]	GO:0006184//GTP catabolic process	GO:0003924//GTPase activity;GO:0005525//GTP binding	-
75	XP_002292510.1	predicted protein [Thalassiosira pseudonana CCMP1335]	40962.6	0.126	3	9	0.73	0.103	0.02098	XP_002292510.1	MWSIPIASANRDLMACAQTGSGKTAGFLFPIIITMLRNGGTEPEGGVRGRRTYPECLVLAPTRELASQIQDEAQKFLYCTGIASVVVYGGADVRDQLRQIERGCDLLVATPGRLVDLIERGRLSMENVKFLVLDEADRMLDMGFEPQIRRIVEQEGMPHGDDRQTMMFSATFPANIQRLAGDFMRDYIFLTVGRVGSASENVVQSVEYVEQNDKLDALMRFLLTIQEGLILIFVETKRNCDFVEDILCERGFPACSIHGDKSQREREDSLRAFKTGRCPVLVATDVAARGLDIPNVTQVVNYDLPTNIDDYVHRIGRTGRAGNTGAALSFVNEKNSGVARELRELLEESGQEVPPWLNQMTSYGG	100	0	gi|224007100|ref|XP_002292510.1|	predicted protein [Thalassiosira pseudonana CCMP1335]	66.3	3e-156	sp|Q0UWA6|DED1_PHANO	ATP-dependent RNA helicase DED1 OS=Phaeosphaeria nodorum (strain SN15 / ATCC MYA-4574 / FGSC 10173) GN=DED1 PE=3 SV=1	288	7e-93	COG0513	Superfamily II DNA and RNA helicase	L	Replication, recombination and repair	K11594|1|4e-156|454|csl:COCSUDRAFT_63003| ATP-dependent RNA helicase DDX3X [EC:3.6.4.13]		GO:0003676//nucleic acid binding;GO:0005524//ATP binding;GO:0008026//ATP-dependent helicase activity	-
76	EJK64574.1	hypothetical protein THAOC_14683 [Thalassiosira oceanica]	23827.4	0.05	1	2	0.71	0.064	0.004793	EJK64574.1	MRVVLLAALAATASGFSSFTPRNLPSHAVTSSSPSQLSMKLYDWKRRTADESAVNDLETEWTLGSIKPAPGSRKRKQRKGRGISAGQGATCGFGMRGQKARSGRPTRPGFEGGQQPLYRRLPKFTGRPTGPGHQKTEYNLIKLDDINGCEEGSTVSFESLIETGATTKAKLDIHKVVVGREEFTAKGVTVQAHAFTKSAQEAIEGAGGKAVLLSKTTNEVLA	100	2e-144	gi|397617711|gb|EJK64574.1|	hypothetical protein THAOC_14683 [Thalassiosira oceanica]	55.33	5e-38	sp|Q7V9X9|RL15_PROMA	50S ribosomal protein L15 OS=Prochlorococcus marinus (strain SARG / CCMP1375 / SS120) GN=rplO PE=3 SV=1	128	8e-36	COG0200	Ribosomal protein L15	J	Translation, ribosomal structure and biogenesis	K02876|1|2e-65|206|ccp:CHC_T00012001001| large subunit ribosomal protein L15	GO:0006412//translation	GO:0003735//structural constituent of ribosome	GO:0015934//large ribosomal subunit
77	EJK73006.1	hypothetical protein THAOC_05399 [Thalassiosira oceanica]	31553.1	0.187	2	4	0.71	0.099	0.01601	EJK73006.1	MWNGCLCLQCIREKEVGVVEDLGQFKRLVGEGPSCILWPLQSVTGRLSLRVQQLDVLCETKTKDNVFVQVGVAVQYRVVTESAYDAWYRLTSPTSQIQAYVFDVIRSTIPRMELDQAFESKDDIAHSVLESLQQVMKDYGYSIVNTLVTDLAPDTKVKASMNEINAARRLKEAASHQAEADKVRQVKAAEADAEARYLSGLGVARQRKAIVKGLQASVSEFSSEVEGADPKDVMDILLLSQYFDTLSTVGANSLILEHDPATVANLQQQVGVSFMAKRQDLLS	100	0	gi|397638309|gb|EJK73006.1|	hypothetical protein THAOC_05399 [Thalassiosira oceanica]	50.91	1e-86	sp|Q5GI04|HIR1_CAPAN	Hypersensitive-induced reaction 1 protein OS=Capsicum annuum GN=HIR1 PE=1 SV=1	265	2e-86	COG0330	Regulator of protease activity HflC, stomatin/prohibitin superfamily	O	Posttranslational modification, protein turnover, chaperones	-			GO:0016020//membrane;GO:0044444//cytoplasmic part;GO:0043231//intracellular membrane-bounded organelle
78	EJK49693.1	hypothetical protein THAOC_31402 [Thalassiosira oceanica]	30880.8	0.036	1	2	0.67	0.088	0.008283	EJK49693.1	MNFLSKLILLAGVGAVAGGASGATNTRPQLSITIKDGNFTDIEGLDPTITWENSALLDNNVVLNFGIDLSARTTNLASLPRKIWGRASHHFGSRYALSTRLEMDVQRPTRLDFELTGEDAESDVQFRLLGRAPTQFKRLSQARVGFVEVKKGFDNDGNRVTVNPRYNLDYDRADVVVTYDADDTLIKVTASQDDQIVTISQKLNDENMISPTIGRDGSLSLAWDRRLGEENTVRTTLNPNRSVDVEWRDAAWTANVNFPMDEKDLSGATVHIKRDIKF	100	2e-177	gi|397575427|gb|EJK49693.1|	hypothetical protein THAOC_31402 [Thalassiosira oceanica]	-	-	-	-	-	-	-	-	-	-	-	-	-	-
79	EED86453.1	predicted protein, partial [Thalassiosira pseudonana CCMP1335]	45447.8	0.09	3	5	0.64	0.087	0.007186	EED86453.1	QASVSVRPDWRRVEEVDLSKLSKGTSPLSGMVDNSPPKKVEDLAWCGFLDQYNDQYDKVSTRTPAPLKRIENKEFYPVTTTDDPVIEKLAIEGKGTVFATDAILAHLMTCPRSVYPWDVVVQKLPTGALFFDKRDASQFDYLTVHETSNTPPAPVNERDNINENDNEALMNTPERLSLEATMINQNFTQQILRSSKYRSKMDLPNPFWDEEDNDGMEPASVAYRYRKFDLGDGIELVARTELHGLAKKKGNQYMTAYALNEYDPSYAANAPPARPGTSINWREKIDNQAGAVLASELKNNSFKLAKWTAQSLLAGASQMKIGFVSRINPKNAYEHTILATQSYRPMDFATQITLNQGTMWGIMRLFIKLLEDQPEGKYVIMRDPNRAIVRIYGVPVGTF…	100	0	gi|224015173|ref|XP_002297246.1|	predicted protein [Thalassiosira pseudonana CCMP1335]	48	5e-120	sp|K7IM66|EIF3D_NASVI	Eukaryotic translation initiation factor 3 subunit D OS=Nasonia vitripennis PE=1 SV=1	-	-	-	-	-	-	K03251|1|1e-117|350|ppp:PHYPADRAFT_131898| translation initiation factor 3 subunit D	GO:0006413//translational initiation	GO:0003743//translation initiation factor activity	-
80	EED91852.1	RS23, ribosomal protein 23 40S small ribosomal subunit [Thalassiosira pseudonana CCMP1335]	15876.6	0.154	2	3	0.41	0.072	0.001735	EED91852.1	MGKPAGIRTGRKLRIHRRNQRWHDLKYTKAHSVTAMKANPMGGSTMAKGIVLEKIGIEAKQPNSAIRKCVRVQLIKNGKKIAAFVPRDGCLNYVDENDEVLVAGFGRSGHAVGDIPGVRFKCVKVAGVSLLALYKEKKEKPRS	100	5e-102	gi|224000856|ref|XP_002290100.1|	RS23, ribosomal protein 23 40S small ribosomal subunit [Thalassiosira pseudonana CCMP1335]	81.82	1e-82	sp|Q86FP7|RS23_DERVA	40S ribosomal protein S23 OS=Dermacentor variabilis GN=RpS23 PE=2 SV=1	167	1e-52	COG0048	Ribosomal protein S12	J	Translation, ribosomal structure and biogenesis	K02973|1|3e-79|233|ccp:CHC_T00010305001| small subunit ribosomal protein S23e	GO:0006412//translation	GO:0003735//structural constituent of ribosome	GO:0033009//nucleomorph;GO:0015935//small ribosomal subunit
81	EJK55379.1	hypothetical protein THAOC_24887 [Thalassiosira oceanica]	71794.6	0.281	2	4	0.52	0.043	0.0005693	EJK55379.1	MKFAALFVAGLAGADAFAPANHGRTARTSPLFDMPDAPEATSIVKDAGDMPVIQSRGGAPVDVRYSDFLKLVNGDKIEKVTFSADGTQLLGVDTDGTRIKLEALPNDPDLLTQLTTHKVDVTVLPSNEAAGGLGDLAQSLILPAALFAGLFFLSRRSGGGMPGGMGGPGNPMGMGKSKAEIQMIPDTGVNFEDVAGCDGAKAELVEVVDFLKQPEVYSKNGCRIPRGVILDGPPGTGKTLLAKAVAGEAGVPFISISGSEFVEMFVGVGASRVRDIFSQAKKNAPCIIFIDEIDAVGRQRGAGFAGGNDEREQTINQILVEMDGFDGNPGIITIAATNRVDILDQALLRPGRFDRKITVDLPDFKGRTRILGVHARGKPLEPDVDLEAIGRRTPGFSGA…	100	0	gi|397591488|gb|EJK55379.1|	hypothetical protein THAOC_24887 [Thalassiosira oceanica]	57.88	0	sp|P72991|FTSH3_SYNY3	ATP-dependent zinc metalloprotease FtsH 3 OS=Synechocystis sp. (strain PCC 6803 / Kazusa) GN=ftsH3 PE=1 SV=1	660	0	COG0465	ATP-dependent Zn proteases	O	Posttranslational modification, protein turnover, chaperones	K03798|1|0.0|731|ccp:CHC_T00009248001| cell division protease FtsH [EC:3.4.24.-]	GO:0030163//protein catabolic process;GO:0006508//proteolysis;GO:0006200//ATP catabolic process	GO:0008270//zinc ion binding;GO:0004222//metalloendopeptidase activity;GO:0016887//ATPase activity;GO:0005524//ATP binding	GO:0016020//membrane;GO:0009507//chloroplast;GO:0009579//thylakoid
82	XP_002293898.1	RS5, ribosomal protein 5 [Thalassiosira pseudonana CCMP1335]	24648.7	0.133	1	4	0.58	0.212	0.04989	XP_002293898.1	MADVEDPIEEPVEVEEEEEEEFVAVGGATEVKLFGKWSFDDIEIRDISLVDYIACKGDHATYLPHTAGRYQKKRFRKASCPIVERLACCLMRKGRNSGKKLMAVRIVQHTLEIIHLLTDQNPVQVVVDAIINSGPREDSTRVGGAGVVRRQAVDMSPFRRVNYALYLLATGAREASFRNLKTVAECLAEELVNAARGSSNSYAIKKKDEIERVSKSNR	100	5e-128	gi|224009880|ref|XP_002293898.1|	RS5, ribosomal protein 5 [Thalassiosira pseudonana CCMP1335]	73.94	5e-99	sp|O65731|RS5_CICAR	40S ribosomal protein S5 (Fragment) OS=Cicer arietinum GN=RPS5 PE=2 SV=1	204	4e-65	COG0049	Ribosomal protein S7	J	Translation, ribosomal structure and biogenesis	K02989|1|8e-103|298|vcn:VOLCADRAFT_120316| small subunit ribosomal protein S5e	GO:0006412//translation	GO:0003735//structural constituent of ribosome;GO:0003723//RNA binding	GO:0022626//cytosolic ribosome;GO:0005773//vacuole;GO:0005886//plasma membrane;GO:0005618//cell wall;GO:0015935//small ribosomal subunit;GO:0009507//chloroplast
83	XP_002289796.1	RS16, ribosomal protein 16 40S small ribosomal subunit [Thalassiosira pseudonana CCMP1335]	16173.7	0.252	2	9	0.37	0.098	0.00463	XP_002289796.1	MPESQSVQVFGKKKTATACAFAKQGRGLIKVNGQPIENIEPECLRLKAFEPVLVLGQDKFANLDIRIRVKGGGFTAQIYAIRSAIAKSIIAYYAKYVDESSKNELRATLMAYDRNLLVADPRRREPKKYGGRSARARFQKSYR	100	8e-74	gi|224000247|ref|XP_002289796.1|	RS16, ribosomal protein 16 40S small ribosomal subunit [Thalassiosira pseudonana CCMP1335]	66.2	6e-47	sp|O22647|RS16_FRIAG	40S ribosomal protein S16 OS=Fritillaria agrestis GN=RPS16 PE=2 SV=1	134	1e-39	COG0103	Ribosomal protein S9	J	Translation, ribosomal structure and biogenesis	K02960|1|6e-49|157|mpp:MICPUCDRAFT_62402| small subunit ribosomal protein S16e			GO:0030529//ribonucleoprotein complex
84	XP_002292597.1	predicted protein [Thalassiosira pseudonana CCMP1335]	23990	0.111	2	3	0.79	0.061	0.008661	XP_002292597.1	MNSMLRLGLATSKRSAFPCNSTSSIICRSMSDKASSTTSSLTRLDGVDELLTGTGGVPTSNKVEYAVSRVDDLVNWARKGSLWPMTFGLACCAVEMMHAAASRYDMERFGMVFRASPRQSDVMIVAGTLTNKMAPALRKVYDQMPEPRWVVSMGSCANGGGYYHYSYSVVRGCDRIVPVDIYVPGCPPTAEALLYGLLQLQKKIKGNKSLLLKLRK	100	7e-135	gi|224007275|ref|XP_002292597.1|	predicted protein [Thalassiosira pseudonana CCMP1335]	85.99	2e-86	sp|O21272|NDUS7_RECAM	NADH-ubiquinone oxidoreductase 20 kDa subunit OS=Reclinomonas americana GN=NAD10 PE=3 SV=1	274	4e-93	COG0377	NADH:ubiquinone oxidoreductase 20 kD subunit (chhain B) or related Fe-S oxidoreductase	C	Energy production and conversion	K03940|1|6e-87|257|ota:OstapMp19|	GO:0019684//photosynthesis, light reaction;GO:0055114//oxidation-reduction process	GO:0005506//iron ion binding;GO:0051539//4 iron, 4 sulfur cluster binding;GO:0048038//quinone binding;GO:0008137//NADH dehydrogenase (ubiquinone) activity	GO:0005886//plasma membrane
85	EJK45703.1	hypothetical protein THAOC_35666, partial [Thalassiosira oceanica]	98850.2	0.054	2	6	0.58	0.211	0.04949	EJK45703.1	ERRVDSPARVKSTHFFSKERAPVISNTIHRNDVRREEGREAAVLPVRQDPKPDQQALLRPRFEDSQRAFLTHILPLRPSFAPGQFVNEAVISQKVIQGVYPGVTTVELDELAAQTAASFATQHPDYAVLAARIEVSNLHKETEKQFSKVRPTEICGDCFRNYTHPKTGEPAPLVSEEVHSVVMANRDVLDGAILHDRDFEFDYFGFKTLEKSYLLKMHGQIAERPQHLLMRVAVGIHMGDIERVLETYNLLSQRFFTHATPTLFNAGTPNPQMSSCFLTCVREDSIDGIYDTLKNCAVISKYAGGIGLSISNVRASASYIRGTNGTSNGIVPMLRVFNNTARYVDQGGGKRKGSIAAYIEPWHADIFAFLDLRKNHGNEMERARDLFYALWIPDLFMER…	100	0	gi|397567645|gb|EJK45703.1|	hypothetical protein THAOC_35666, partial [Thalassiosira oceanica]	62.36	0	sp|Q9SJ20|RIR1_ARATH	Ribonucleoside-diphosphate reductase large subunit OS=Arabidopsis thaliana GN=RNR1 PE=1 SV=1	1067	0	COG0209	Ribonucleotide reductase alpha subunit	F	Nucleotide transport and metabolism	K10807|1|0.0|1074|cme:CYME_CMM323C| ribonucleoside-diphosphate reductase subunit M1 [EC:1.17.4.1]	GO:0006260//DNA replication;GO:0055114//oxidation-reduction process	GO:0005524//ATP binding;GO:0004748//ribonucleoside-diphosphate reductase activity, thioredoxin disulfide as acceptor	GO:0005971//ribonucleoside-diphosphate reductase complex
86	XP_002295005.1	predicted protein [Thalassiosira pseudonana CCMP1335]	44152.5	0.03	1	1	0.64	0.159	0.03311	XP_002295005.1	MSAFHTFLSIPTFLLFQLTWLLHSLRRPILLVLALCLLSNPSSAIRKLKLVYTSFLYLIFCKDKKWKVPKEDPAVHFPKDFGGTAPSPVSGAKYKEKTIILIRHGESTWNDTFNPGDRNKLVFILLYIPNMIYAIAMEGYFFVSGKDSESWFFDSALSGKGVRQSEGLRKFLKKEKMRLGSGLDKREEVAVKLLLDLDNSSGEKEPSSHVVSSNLRRAISTAAIGLSDRFAASIKSNKNDKILLLPSLQEISRNPDALTILPPHGVAHPTWCDVSIPGITPSAFSALIDTQYHLGNKSLDSNGLIRLTQFCNDLFSNKLPKSNVIAAGHSLFFRSFFQLYLPRGVEHISKKKKLVNGGTVMFTLREATVGGKKQYMIDPSSVVVIYGGFGKHTKG	100	0	gi|224012705|ref|XP_002295005.1|	predicted protein [Thalassiosira pseudonana CCMP1335]	-	-	-	-	-	-	-	-	-	-	-	GO:0008152//metabolic process	GO:0003824//catalytic activity	-
87	ACI64658.1	ABC transporter [Thalassiosira pseudonana CCMP1335]	120821	0.012	1	1	0.66	0.107	0.01388	ACI64658.1	MTSTGQVVNMMSNDTSQLQRFLQFFGFTIVAPVQIVIALVLIYRQVGNATWVGVGFMFLLIPVNGVVFSNISKMRRKVLKYSDARVKMVNEILGGIRIIKFYGWEKAFGKEVDRLRTKELRALTVLAYTSAIGFSLIMLSAPIINPILVFLAYINTQSSSLDAATAFTTIALFNILRFPFAFLPMGFLQFIQSRIALRRLSRYLELSELSSYVVNGMPPELGDDADAPTMDDDTKESRIALKNIACSIERGSLVAVVGTVGSGKSSLLSAILGEMEPIDGSKVFMPTKEGEVYHDNLVSYCSQSPWVVNDTLRGNILFGRPYDDDRYNEVVAACALVDDLVVLPAGDMTEIGERGINLSGGQKARVALARSMYSQETQLMLLDDPLSAVDAHVGEHLFR…	100	0	gi|224004580|ref|XP_002295941.1|	ABC transporter [Thalassiosira pseudonana CCMP1335]	40.68	0	sp|Q54JR2|ABCC3_DICDI	ABC transporter C family member 3 OS=Dictyostelium discoideum GN=abcC3 PE=3 SV=1	552	1e-175	COG1132	ABC-type multidrug transport system, ATPase and permease component	V	Defense mechanisms	K05665|1|0.0|690|cre:CHLREDRAFT_54676| ATP-binding cassette, subfamily C (CFTR/MRP), member 1!K05666|3|0.0|664|ppp:PHYPADRAFT_187434| ATP-binding cassette, subfamily C (CFTR/MRP), member 2	GO:0055085//transmembrane transport;GO:0006200//ATP catabolic process	GO:0042626//ATPase activity, coupled to transmembrane movement of substances;GO:0005524//ATP binding	GO:0016021//integral component of membrane
88	EJK66298.1	hypothetical protein THAOC_12791 [Thalassiosira oceanica]	31956.6	0.038	1	1	0.83	0.069	0.01968	EJK66298.1	MVLRGKAADAVRSATAASMASVVSVVLLMWLRTSMSYQHVKGLSLKDALQELYAQGGVARFYRGMIPALCMMPLSRFGDIFSNELSRELLSGSFRAGIVTMFASSLAACWRILITPADCIKTMMQVHGNEGLALLQDKVAKNGIIALYDGALGASWVGHYPWFVTYNFLVGFCERNRILDAHLQNQNTTRKNVRRALIGLCSSLVSDVCSNAIRVLKTYKQTSIEPVTYLEAAQRIIDKDGLRGLLFRGLSSKLTANALNAMLFTVVWKAISERMAMQKSQLERKAG	100	0	gi|397621450|gb|EJK66298.1|	hypothetical protein THAOC_12791 [Thalassiosira oceanica]	-	-	-	-	-	-	-	-	-	-	-	-	-	-
89	XP_002293195.1	predicted protein, partial [Thalassiosira pseudonana CCMP1335]	8598.17	0.13	1	11	0.52	0.126	0.01151	XP_002293195.1	LYVGNLSFETTEESVRGLFEQYGQVTDCFLPTDRDSGRVRGFAFVTMPAKEAETACSKTNGAELDGRTLRVNEAQPK	100	2e-51	gi|224008472|ref|XP_002293195.1|	predicted protein [Thalassiosira pseudonana CCMP1335]	52.56	1e-22	sp|Q9WX39|RBPF_NOSS1	Putative RNA-binding protein RbpF OS=Nostoc sp. (strain PCC 7120 / SAG 25.82 / UTEX 2576) GN=rbpF PE=3 SV=3	94	2e-25	COG0724	RNA recognition motif (RRM) domain	J	Translation, ribosomal structure and biogenesis	K12885|1|1e-16|74.3|ats:F775_28092| heterogeneous nuclear ribonucleoprotein G!K11294|2|1e-16|74.7|pop:POPTR_0006s12910g| nucleolin!K12741|4|2e-16|73.9|obr:102701775| heterogeneous nuclear ribonucleoprotein A1/A3		GO:0003676//nucleic acid binding;GO:0000166//nucleotide binding	-
90	EJK50243.1	hypothetical protein THAOC_30820 [Thalassiosira oceanica]	83102	0.012	1	7	0.73	0.12	0.03022	EJK50243.1	MMVYGRAVLRSGIARKLLVPRRSVIATSNGFFDQEALASRRRLSPPSSRSAAVHSYSAPCSNLPAVRHLSTAAVEETDDDCAYTLKRREGIRNVAIVAHVDHGKTTLVDELLKVATSSTDIEGNETADDADLNRLMDSGELEKERGITITSKVTRLDYTSESNESYTINVVDTPGHADFAGEVDRILSTVDGVVLVVDAGEGPKSQTKYVLTRALSLGLVPIVVLNKADREESILRLEGGETELELMDLFEALGADADQMEYRTLYGSARGGWIADDVDVALKVVRENGGSESEGAMSMRGLLEAILEDIPSPSVHWYDESSDDSAKREASEFENEPFSMAATTVGFDSYLGRTCTGRIYSGDSITLLPRLDSDSAVSEGTGPKSQVSGVFANRGVSRV…	100	0	gi|397576407|gb|EJK50243.1|	hypothetical protein THAOC_30820 [Thalassiosira oceanica]	39.1	2e-145	sp|Q9ZLZ3|TYPA_HELPJ	GTP-binding protein TypA/BipA homolog OS=Helicobacter pylori (strain J99 / ATCC 700824) GN=typA PE=3 SV=1	507	5e-170	COG1217	Predicted membrane GTPase involved in stress response	T	Signal transduction mechanisms	K06207|1|2e-154|467|mpp:MICPUCDRAFT_1275| GTP-binding protein	GO:0006184//GTP catabolic process	GO:0016829//lyase activity;GO:0003924//GTPase activity;GO:0005525//GTP binding	GO:0005622//intracellular
91	EJK62291.1	hypothetical protein THAOC_17104 [Thalassiosira oceanica]	44034.8	0.184	2	2	0.58	0.206	0.04721	EJK62291.1	MNNISRSVVRRSLSTRGLRLSSDSVGLARPAHPAALRQTIRQYTLDRPGGGGFFSLGSGGGGGGNDALEISNWPVTKVNTILNIVPQGKRFVVERLGKLHTIHESGFFFAVPIIDQISYVIDVRERAVDIQPQSAITRDNVSVEVSGNLFVRVSDPEKAAYGARNPLYAVMMVGSYHVHLSYPIDLWISQVPYGRSAIGELELDEILHNRAGLNTLIKGSLQDAAVAWGLEVRRYELTEITPDDQIRIAMDKQAAAERDRREQVLRAEGDKRRAELTSEGIKISLKNESEGKLIQVTNEAEAEKVRLLREAEGKAESLKIQAIAQAEALSKISEQLQKSGGQEAAALELAKEYAQMYATMGSKSNTMFFQESAGNANSLLVQAMSAMKAMDAKIPSDIS…	100	0	gi|397613558|gb|EJK62291.1|	hypothetical protein THAOC_17104 [Thalassiosira oceanica]	32.45	1e-48	sp|O60121|YH77_SCHPO	Uncharacterized protein C16G5.07c OS=Schizosaccharomyces pombe (strain 972 / ATCC 24843) GN=SPBC16G5.07c PE=3 SV=1	189	3e-55	COG0330	Regulator of protease activity HflC, stomatin/prohibitin superfamily	O	Posttranslational modification, protein turnover, chaperones	-			GO:0005739//mitochondrion;GO:0016020//membrane
92	EJK62928.1	hypothetical protein THAOC_16443 [Thalassiosira oceanica]	61962.2	0.016	1	1	0.54	0.154	0.02121	EJK62928.1	MSAAMAMRCLRPRGPVAAFATREGPALGSNSCRRLRPLSTWNWSKKVTPAPTPTPSSEDTAGAAQALGGGVPSSSAQQAILSKCSHLHSSIMPMNASLGGPLAKNSDRGTSLPFVFLVGNHSSGKSSFINFILGRPVQTAGVAPTDDCFTVIAPGPADVDQDGPALVGDPDIGFEGLRQFGPTLIHHTQLKVREGVRTEGFMMVDSPGMIDSPVSSGGMSHASADGSAIMDRGYDFQGVVRWFAERADVSVLDYALAATHRLGECSLGDTSLNASRSSAYTPPTYLGTTGETLSILLHSLGGMDHKLLIVLNKADQFKKIHDFARAYGSLCWNLSKVIPRKDLPRIFTMCLPVAKSDENGAVPIGDEALDQRALADLHQTRDDVLSEVMKAPKRRIDNV…	100	0	gi|397614649|gb|EJK62928.1|	hypothetical protein THAOC_16443 [Thalassiosira oceanica]	27.69	1e-23	sp|Q94CF0|EHD1_ARATH	EH domain-containing protein 1 OS=Arabidopsis thaliana GN=EHD1 PE=1 SV=1	134	6e-32	COG0699	Replication fork clamp-binding protein CrfC (dynamin-like GTPase family)	L	Replication, recombination and repair	K12483|1|9e-26|115|fve:101309036| EH domain-containing protein 1	-	-	-
93	EED89850.1	predicted protein [Thalassiosira pseudonana CCMP1335]	31772.5	0.14	4	6	0.56	0.185	0.03534	EED89850.1	MSATTTEETKPQPTLGEILDKAAKSAMRGGTAGAVAMGLNVGALMWMRTTVNYQYRNGTSFPVALKTLYADGGIPRFYRGVLPALIQGPLSRFGDTAANTGMLTLMNSFDATKDLNVGYKTVAASGAAAAFRIFLMPVDTVKTTMQVTGKFSNVVNKVKIEGIPALYHGSLAAASATFVGHYPWFFTYNYLSEKIPKQDDPLKELGRRAILGFCSSAVSDTCSNSIRVIKVYKQSSEVALSYPEVVRNVIKESGISGLMFRGLETKILANGLQGILFSVMWKHFEEVLFPKK	100	0	gi|224007389|ref|XP_002292654.1|	predicted protein [Thalassiosira pseudonana CCMP1335]	-	-	-	-	-	-	-	-	-	-	-	GO:0044237//cellular metabolic process;GO:0006810//transport	GO:0003824//catalytic activity;GO:0050662//coenzyme binding;GO:0000166//nucleotide binding	GO:0016021//integral component of membrane
94	XP_002291329.1	hypothetical protein THAPSDRAFT_262699 [Thalassiosira pseudonana CCMP1335]	50455.6	0.031	1	1	0.67	0.092	0.009681	XP_002291329.1	MSERWSGQGGAFAVGLLAGSIATLLLASRKSDDKSGDTHHQPPSQPHNGQSNTTNHLPSEIRSEMLSRNSLYFSSPTDAPGTNHGMERITNSIVLIVGLGGVGSHTAHMLARSGVQYLRLVDFDQVTLSSLNRHAVATLKDVGLPKATVLCQHLREICPDESKLILDPIIKMYTGDKEKDGGMLDPPPGKQWDCVIDAIDDVPTKANLIAYCAKRNIRVISCMGAGGKADPTRVHISDLRSASRDPLATAVRQKLRLMGKMEAKKMACVYSSEKVVAKLAQITPEQKEEGMQNFGAMDNMRVRVLPVVGTMPAIMGQTLAAMALCELGNKAFTPQREKNLEDKLMPTLKNGDENITTNGVYIGPILIDPDDVEYLMVELWRNRCGVTGDRLGTSLELYR…	100	0	gi|224003315|ref|XP_002291329.1|	hypothetical protein THAPSDRAFT_262699 [Thalassiosira pseudonana CCMP1335]	35.29	1e-53	sp|P36101|TCD2_YEAST	tRNA threonylcarbamoyladenosine dehydratase 2 OS=Saccharomyces cerevisiae (strain ATCC 204508 / S288c) GN=TCD2 PE=1 SV=1	131	1e-33	COG1179	tRNA A37 threonylcarbamoyladenosine dehydratase	J	Translation, ribosomal structure and biogenesis	-	GO:0008152//metabolic process	GO:0000166//nucleotide binding;GO:0003824//catalytic activity	-
95	XP_002286395.1	heat shock protein HslVU, ATPase [Thalassiosira pseudonana CCMP1335]	60498.9	0.025	1	4	0.76	0.104	0.02629	XP_002286395.1	MLLATSAFRRCPSSSNAAASALRSVTSRRQPAPGRFLSAITSSSGDDDKGDSADGGADSMAEASDATADDKTTSEDETSPSADDDAPPSSSSTSDPLPGWIHTIALRPTEVVTELNRHIVGQSSAKKAVAIAMRNRWRRRQLPPALLKEVTPRNVLMIGPTGCGKTEVARRMASLSDAPFLKVEATKFTEVGYHGRDVDQIVRDLMDVSMALTKKRQTEKLRGEAKGLVEERILDILIGPDGTGTNKSSRDSFRSMLRDGLLEDHELEVDVPENLGQGGGKDGEGAVVAFGGDASSGMNVQAMSDLIRKLGGGGGQRRGPPTERKKMAISEAREVILEIELEKLLEKVDLKKEAVAAAEESGIVFIDEIDKICSSRDYNSRSADASAEGVQRDLLPLVE…	100	0	gi|223993423|ref|XP_002286395.1|	heat shock protein HslVU, ATPase [Thalassiosira pseudonana CCMP1335]	51.21	2e-146	sp|A7HSH7|HSLU_PARL1	ATP-dependent protease ATPase subunit HslU OS=Parvibaculum lavamentivorans (strain DS-1 / DSM 13023 / NCIMB 13966) GN=hslU PE=3 SV=1	464	9e-159	COG1220	ATP-dependent protease HslVU (ClpYQ), ATPase subunit	O	Posttranslational modification, protein turnover, chaperones	K03667|1|9e-157|462|cme:CYME_CMT122C| ATP-dependent HslUV protease ATP-binding subunit HslU	GO:0006200//ATP catabolic process;GO:0006950//response to stress	GO:0070011//peptidase activity, acting on L-amino acid peptides;GO:0005524//ATP binding;GO:0016887//ATPase activity	GO:0009376//HslUV protease complex
96	EED92549.1	RM17, ribosomal protein 17 mitochondrial large ribosomal subunit, partial [Thalassiosira pseudonana CCMP1335]	13701.5	0.068	1	2	0.15	0.079	0.003516	EED92549.1	MRKRLAQFRKLGRTPEHKWAMLRNMVTSLIKHERIETTLPKAKELRHLADKVVGYAKKGDVHAKQLALRVVREKPVVTKLFEVLGPRYEDRDGGYTRVMKLSRPRHGDNAPMAVIEYV	100	6e-82	gi|224002250|ref|XP_002290797.1|	RM17, ribosomal protein 17 mitochondrial large ribosomal subunit [Thalassiosira pseudonana CCMP1335]	63.64	2e-41	sp|B4R8P2|RL17_PHEZH	50S ribosomal protein L17 OS=Phenylobacterium zucineum (strain HLK1) GN=rplQ PE=3 SV=1	138	1e-41	COG0203	Ribosomal protein L17	J	Translation, ribosomal structure and biogenesis	K02879|1|2e-37|125|cvr:CHLNCDRAFT_17719| large subunit ribosomal protein L17	GO:0006412//translation	GO:0003735//structural constituent of ribosome	GO:0005840//ribosome
97	XP_002287097.1	coproporphyrinogen III oxidase, chloroplast targeted [Thalassiosira pseudonana CCMP1335]	34302.5	0.182	4	13	0.83	0.098	0.04699	XP_002287097.1	MLREAQISITDAIAEIDGKAVFNEDCWTRANGGGGMSRVLKDGAVWEKAGVNLSVVYGSMPQEALQAATERGVDRAKGMAPGERVPFFACGLSCVMHPRNPYCPTMHFNYRYFETDGGVWWFGGGTDITPSYLNLDDMKHFHGTYKEVCDKHDPEFYPKFKEWADRYFVISHRNETRGLGGIFFDDLNDREPEKLFEFAKDAVNSVVPAYGPIIEAHKDDPFTQREKDWQQIRRGRYVEFNLVYDRGTIFGLKTGGRIESILMSLPETARWEYDHHPEEGSPEAEIMDCFKHAREWV	100	0	gi|223994827|ref|XP_002287097.1|	coproporphyrinogen III oxidase, chloroplast targeted [Thalassiosira pseudonana CCMP1335]	61.31	1e-135	sp|P35055|HEM6_SOYBN	Oxygen-dependent coproporphyrinogen-III oxidase, chloroplastic OS=Glycine max GN=CPX PE=2 SV=1	311	9e-105	COG0408	Coproporphyrinogen III oxidase	H	Coenzyme transport and metabolism	K00228|1|6e-152|432|cre:CHLREDRAFT_53583| coproporphyrinogen III oxidase [EC:1.3.3.3]	GO:0006779//porphyrin-containing compound biosynthetic process;GO:0055114//oxidation-reduction process	GO:0004109//coproporphyrinogen oxidase activity	-
98	YP_004072644.1	50S ribosomal protein L13 (chloroplast) [Thalassiosira oceanica CCMP1005]	15949.6	0.101	1	1	0.72	0.121	0.02686	YP_004072644.1	MNKTFIPSTNYNKRKWYVIDCKDKQLGRLASSIVPLLTGKTKSIYHPSLDVGDYVILINSEELKIDRDVERFHVYEPGRPGSSLKRLVNILPKRIIENCVFNMLPNGFPKKHLVKRLKVYQGAVHPHAAQDPKVLEII	100	1e-98	gi|315320587|ref|YP_004072644.1|	50S ribosomal protein L13 [Thalassiosira oceanica CCMP1005]	51.47	8e-48	sp|P49551|RK13_ODOSI	50S ribosomal protein L13, chloroplastic OS=Odontella sinensis GN=rpl13 PE=3 SV=1	130	4e-38	COG0102	Ribosomal protein L13	J	Translation, ribosomal structure and biogenesis	K02871|1|8e-30|109|ppp:PHYPADRAFT_47260| large subunit ribosomal protein L13	GO:0006412//translation	GO:0003735//structural constituent of ribosome	GO:0005840//ribosome;GO:0009507//chloroplast
99	EJK56174.1	hypothetical protein THAOC_23991 [Thalassiosira oceanica]	17127.8	0.253	1	9	0.35	0.102	0.004909	EJK56174.1	MAEETRGICVRDVPAKAFIAAYAEHLKNSDKFELPVWADLVKTSVAKELAPYGDDWYYIRAASIARRVYLRPGLGVGQLRKWYGGTDKKGVKTEHFRKANAGIIRSVLIQLEEMKVTEKCEKGGRRMTRVGQQDLDRIAGSVFYDEEEED	100	6e-108	gi|397594205|gb|EJK56174.1|	hypothetical protein THAOC_23991 [Thalassiosira oceanica]	56.62	1e-50	sp|Q9SGA6|RS191_ARATH	40S ribosomal protein S19-1 OS=Arabidopsis thaliana GN=RPS19A PE=2 SV=1	114	1e-31	COG2238	Ribosomal protein S19E (S16A)	J	Translation, ribosomal structure and biogenesis	K02966|1|1e-50|161|crb:CARUB_v10002213mg| small subunit ribosomal protein S19e	GO:0001510//RNA methylation;GO:0006412//translation	GO:0003735//structural constituent of ribosome	GO:0005618//cell wall;GO:0005730//nucleolus;GO:0009506//plasmodesma;GO:0022627//cytosolic small ribosomal subunit;GO:0016020//membrane
100	XP_002290318.1	predicted protein [Thalassiosira pseudonana CCMP1335]	139222	0.012	1	1	0.79	0.014	0.0001231	XP_002290318.1	MLIMILRMMLLICSPGGSALRHKMDLANFLIQRHEREQQEQGKLEAQAQGAWRGGNEENFVKMVKELSEGKMADEIQKTNNEPDVNKGESKNDENGVPPLDMPKEANKELVVNEGEPKKGGPPKEWEYLQNIMSWQALQHVLLDNNLLPKPIAQTKTARGHSGLPSNETPSLEGARRGTIACATTHPEVQEVMSSMLAFWNDPRGERNDNPQHTNTKLYNATHPHPFLPAPLPPFDDTTPKSSRIRHKRYLTFEPDTGGWNNLRMSFENIIVLAAMSGRTLVLPPDQIIYLLEPRKGDTRRGRNYNDIFNLTDNNELLRRVPIITAEEFLAIEGGNDGLIPIDKYNSTYQKHLLDITKECEERKKSDVFCEDLYDHYRDHGLLADISAEPPHEQCFIFD…	100	0	gi|224001292|ref|XP_002290318.1|	predicted protein [Thalassiosira pseudonana CCMP1335]	-	-	-	-	-	-	-	-	-	-	-	-	-	-
101	EED90892.1	hypothetical protein THAPSDRAFT_263399, partial [Thalassiosira pseudonana CCMP1335]	50981.1	0.046	2	2	0.66	0.077	0.0058	EED90892.1	LVLAAAAVAIYKNRHRLYLGSDPDPNFSEPLPEGSLGCPLLGNLGFFTKNGTPETGPGEFFRLQAKTVDNASIFKYMALGKPVAMVSGMKNVKSAFNTEFKKIRTGSLIKNFYRLFGKQSLLFISDADRHQYLRRLVGQSMTPEAISNAMPALVNVATDQIELLSEHPITVMESALTNYTLDVAWRQILGLDLKEDEIVTFYDAVDNWIGGITNVRTLFLPGMENTKAGKGLIYLKSKIERRIDELLANGPDGSTMSYMVYAKDEEDATKSMTREEIIDNALLLILAGSETAASTLTVAMLALGLNKDAFQKLKDEQRQLISEHGEELTRSMLDKDCPYLDAVVKETMRIKPLAGTGAVRIAEETIVVDGKQIPKGYGVAFNIFLTHASDPVVKEEDGF…	100	0	gi|224006161|ref|XP_002292041.1|	hypothetical protein THAPSDRAFT_263399 [Thalassiosira pseudonana CCMP1335]	26.88	3e-36	sp|O93323|CP26A_XENLA	Cytochrome P450 26A1 OS=Xenopus laevis GN=cyp26a1 PE=2 SV=1	160	2e-42	COG2124	Cytochrome P450	QV	Secondary metabolites biosynthesis, transport and catabolism;Defense mechanisms	K20667|1|6e-37|145|atr:18441954| beta-amyrin 28-monooxygenase [EC:1.14.13.201]!K12664|2|1e-35|139|csl:COCSUDRAFT_65656| cytochrome P450 family 26 subfamily B!K09843|3|3e-34|137|cic:CICLE_v10011655mg| (+)-abscisic acid 8'-hydroxylase [EC:1.14.13.93]	GO:0055114//oxidation-reduction process	GO:0020037//heme binding;GO:0016705//oxidoreductase activity, acting on paired donors, with incorporation or reduction of molecular oxygen;GO:0004497//monooxygenase activity;GO:0005506//iron ion binding;GO:0009055//electron carrier activity	-
102	YP_009093407.1	photosystem I P700 apoprotein A1 (chloroplast) [Thalassiosira weissflogii]	83908.3	0.102	6	24	0.54	0.128	0.0128	YP_009093407.1	MAISSTERRSKNVQVFVEKDAVETSFAKWAQPGHFSRTLAKGPKTTTWIWNLHADAHDFDSQTNSLEEVSRKIFSAHFGQLAIIFLWISGMHFHGAYFSNYSAWLTDPISIKQSSQVVWPIVGQEILNADVGGNFQGVQTTSGWFQMWRAEGITSEVELYWTAIGGLAMSAIMLFAGWFHYHKAAPKLEWFQNAESMMNHHLAGLLGLGCLSWSGHQIHIALPINKLLDAGVSPQEIPLPHEFIINRDLMAQLYPSFGKGLAPFFSGNWGEYSDFLTFKGGLNPVTGGLWLSDIAHHHLALAVLFIVAGHMYRTNWGIGHNMKEILEAHKGPFTGEGHKGLYEILTTSWHAQLAINLAMMGSLSIIVAHHMYAMPPYPYIATDYATQLSLFTHHMWIGG…	100	0	gi|700082609|ref|YP_009093407.1|	photosystem I P700 apoprotein A1 (chloroplast) [Thalassiosira weissflogii]	98.67	0	sp|A0T0M8|PSAA_THAPS	Photosystem I P700 chlorophyll a apoprotein A1 OS=Thalassiosira pseudonana GN=psaA PE=3 SV=1	592	0	COG2885	Outer membrane protein OmpA and related peptidoglycan-associated (lipo)proteins	M	Cell wall/membrane/envelope biogenesis	K02689|1|0.0|1330|ccp:CHC_635| photosystem I P700 chlorophyll a apoprotein A1	GO:0018298//protein-chromophore linkage;GO:0015979//photosynthesis;GO:0022900//electron transport chain	GO:0016491//oxidoreductase activity;GO:0009055//electron carrier activity;GO:0000287//magnesium ion binding;GO:0016168//chlorophyll binding;GO:0051539//4 iron, 4 sulfur cluster binding	GO:0016021//integral component of membrane;GO:0009522//photosystem I;GO:0009535//chloroplast thylakoid membrane
103	XP_002291363.1	DNA directed RNA polymerase II, second largest subunit [Thalassiosira pseudonana CCMP1335]	136373	0.047	6	11	0.82	0.076	0.02421	XP_002291363.1	MDLDDMPVTQEDAWAVISAYFEEKGLVRQQLDSFDEFIQNTMQELVDDSGSIRVSPEIQHLVGYDEANFDETMNSTTKKVFEVKFGQVYLSKPTTVEKDGTVTNMFPHEARLRNLTYAAPLYVDVTMNEYRVGNDVNVGDPAEDMGEPVSTEEARKEFLGYVPIMLRSLFCVLSDKDDAQLADLGECIYDQGGYFVINGSEKVIVAQERMSNNHVYAFKKKQPSKFSWVIETRSQVENSTRPTSTLYIQMYQKGGKGAIEGNQIRSTLPYIRTDIPVVIIFRALGYVADRDIIEHVVYDLTDGEMMDLFRPSLEEAFVIQKQEVALDFIGRRGSARDVTKDDRIRYAAGILQKEVLPHVGTEEHCETKKGFFLGYAVHKLLMCKLGRADEDDRDHFGKK…	100	0	gi|224003383|ref|XP_002291363.1|	DNA directed RNA polymerase II, second largest subunit [Thalassiosira pseudonana CCMP1335]	63.29	0	sp|P38420|NRPB2_ARATH	DNA-directed RNA polymerase II subunit 2 OS=Arabidopsis thaliana GN=NRPB2 PE=1 SV=2	887	0	COG0085	DNA-directed RNA polymerase, beta subunit/140 kD subunit	K	Transcription	K03010|1|0.0|1573|nnu:104587142| DNA-directed RNA polymerase II subunit RPB2 [EC:2.7.7.6]	GO:0006351//transcription, DNA-templated	GO:0003899//DNA-directed RNA polymerase activity;GO:0003677//DNA binding;GO:0032549//ribonucleoside binding	-
104	EED92951.1	atp-dependent RNA helicase [Thalassiosira pseudonana CCMP1335]	54183.2	0.016	1	1	0.77	0.046	0.002929	EED92951.1	MVIPDVIESERNAHLRGARDVCCHAPTGSGKTLAFVLPLLTALYNESPGQSCTRGFRRLRALVVLPGRDLAKQVHDVFVRYAKGSHLKIGLAVGGGKKKSDLVYERRSLVAYDGTTRRDNGIQVFPEFGGQSAVDILVATPGRLMDHLDSTPGFTLQHLRFLVIDEADRLVNQPYQNWVGRVLEASNSSNRFGSSVPVVRHGEKDQANTGGELVSGMFGRPVPLRKMLFSATLTQDPQKLAVLGLKNPKHFDANQVENIKAGSYSVPEGLTERMVECTAEQKPMVLLALLLDTEQLHSDSAGDGVKGVNLSIVFTSSVDSTHRLARLLQLLWEAGGYGPSSTIAEFSSSISAKQRAGILRRCRSSNVSNRVSVLVCSDGMSRGMDLPCVSAVINYDVPS…	100	0	gi|223999483|ref|XP_002289414.1|	atp-dependent RNA helicase [Thalassiosira pseudonana CCMP1335]	38.03	9e-78	sp|Q7FGZ2|RH1_ARATH	DEAD-box ATP-dependent RNA helicase 1 OS=Arabidopsis thaliana GN=RH1 PE=2 SV=3	147	2e-37	COG0513	Superfamily II DNA and RNA helicase	L	Replication, recombination and repair	K14807|1|4e-82|267|fve:101293073| ATP-dependent RNA helicase DDX51/DBP6 [EC:3.6.4.13]		GO:0003676//nucleic acid binding;GO:0005524//ATP binding;GO:0008026//ATP-dependent helicase activity	-
105	XP_002296691.1	predicted protein [Thalassiosira pseudonana CCMP1335]	87391.3	0.012	1	1	0.82	0.079	0.02429	XP_002296691.1	MAEQVQAVLERMVAPLKDLRDRGIFSEEEIRAIVNRRRQSEYLLQRRGTARQSDYLRYIEQEILLEKLRKLRKQKVMQEQHEERRRRRLEGLDDSDNDDDGENDDGTSNQGRKNGKGKKKHAYQSSGPGDSHIISHIHFLYQRLLKKFHYPVEVIVNYAAFAREHKSFHVMSRVYAEGLQHHPREEGLWIEAASFEFFGVPSYHGRQTNANVVPLTSHIRHIAQDNERSETTKLVGSSIQNARVLMQRGLRINGKTSQELWLQYFALEMHYVQKLRGRREILEGAKAKDDASDEDGNEDSEGERGKVTSVSNSMLLPSQIIYKNAIKSIPDNIQFRLRFIETCRQFPQTSELERYIMESVESDFGESVEGWVARISYGEEKLRRRIAKGKGGGGQVGFL…	100	0	gi|224014056|ref|XP_002296691.1|	predicted protein [Thalassiosira pseudonana CCMP1335]	-	-	-	-	-	-	-	-	-	-	K14557|1|2e-24|112|smo:SELMODRAFT_419083| U3 small nucleolar RNA-associated protein 6	GO:0006396//RNA processing		GO:0005622//intracellular
106	EED89383.1	DnaJ protein [Thalassiosira pseudonana CCMP1335]	44376.3	0.14	3	5	0.68	0.138	0.03025	EED89383.1	MHGGGGSRRGGASARGGGGNVDTTKLYETLGIEKTADDKEIKKAYRKLAVKHHPDKGGDEHKFKEISAAYEVLSDKEKRAKYDKFGLEGISEDGGGGGGHEDLFSMFFGGGRGGGGRSSGPRKGEAVNHPLKVSLEDLYNGKTAKIAINRQVIVGESKMCTACDGQGVVVELRQIALGMVQQLQRRCTECGGQGYCAERRKERKILEVLVEKGMKHNAKIVFRGMGDEKPNIEAGDVNFVIQEKEHEVFKRKGADLLITKTLSLNEALCGFEWIVKHLDGREIAIKSKPGEVIKPEASSSHPFVKIVPNEGMPSHGNPFVKGNLYVLFRVEFPSDGELSAKAVAALKKVLPRPAMDISYDEETVEVCHLEGADVKNFGKGGAANHDNNYDSDEEGEGPG…	100	0	gi|224009377|ref|XP_002293647.1|	DnaJ protein [Thalassiosira pseudonana CCMP1335]	45.24	5e-93	sp|P42825|DNAJ2_ARATH	Chaperone protein dnaJ 2 OS=Arabidopsis thaliana GN=ATJ2 PE=1 SV=2	153	5e-41	COG0484	DnaJ-class molecular chaperone with C-terminal Zn finger domain	O	Posttranslational modification, protein turnover, chaperones	K09503|1|4e-103|315|ota:Ot08g03410| DnaJ homolog subfamily A member 2	GO:0006457//protein folding	GO:0046872//metal ion binding;GO:0031072//heat shock protein binding;GO:0051082//unfolded protein binding	-
107	EED91252.1	predicted protein [Thalassiosira pseudonana CCMP1335]	34775.3	0.04	1	1	0.42	0.088	0.003464	EED91252.1	MKSSPPDRDVSPPMGGGGDTNHNGPPPDTMGNHHHHPVNRGAGGTETRGRVGAGQEVMRGAAGGAGGDRGVGLGVLGAGAVVGSVGETVIVTTVVIAEIGIIVTGMFLLNGDLLLIIVEVYNTLFIFFTNHHLLSGGRNDRDHGPPPPGFFGQGGPPPPGYGGFPRDFPDAGNRRGGRASRRDDGPPGVSLLVRNVNGEISTQDLQMAFGRIGEVRDVYIPRDFHSQQPKGFAFIEYATPEQAREARDEMNHFMMKGREIEVVYAQEKRKTPNEMRGRVVDGREVRPGERGGGGGGDFQRSSSFERHKRRERERENVFRPGDAN	100	1e-118	gi|224002947|ref|XP_002291145.1|	predicted protein [Thalassiosira pseudonana CCMP1335]	43.68	1e-19	sp|Q9LHP2|SL30A_ARATH	Serine/arginine-rich SC35-like splicing factor SCL30A OS=Arabidopsis thaliana GN=SCL30A PE=1 SV=1	56.2	2e-08	COG0724	RNA recognition motif (RRM) domain	J	Translation, ribosomal structure and biogenesis	K12900|1|5e-23|94.7|smo:SELMODRAFT_8400| FUS-interacting serine-arginine-rich protein 1		GO:0003676//nucleic acid binding;GO:0000166//nucleotide binding	-
108	XP_002296141.1	RL3, ribosomal protein 3, 60S large ribosomal subunit [Thalassiosira pseudonana CCMP1335]	44739.7	0.025	1	2	0.33	0.192	0.02634	XP_002296141.1	MSHRKFEAPRHGNLGFLPKKRTKHHSGRIRSFPKDNDASAPPHLTAFRAYKAGMTHVVRGVDRPGAVMHKREVVDAVSILETPPMVVVGVVGYLETPRGLRTLTTVFAEHLSEEFKRRAYKNWYKSKRKAYTKYAKKYTENDGKDIEKELERIAKHCKVVRVITHSQVKKLHLRIRKAHIMEVQINGGADAKAKVDFAKSLFEKEVTVDSVFAKDELIDVLGVTKGHGYEGVTTRWGVSRLPRKTHRGLRKVACIGSWHPARVSDTVPRAGQNGYHHRTEMNKKIYRIGKKGDNSSCQTDADLTEKSITPMGGFVHYGQIREDWVMIKGACVGVKKRPLILRKSLMKHSSRKHLESIDLRFIDTSSKLGHGRFQTAEEKAKFLGPLASSGANKSA	100	0	gi|224004980|ref|XP_002296141.1|	RL3, ribosomal protein 3, 60S large ribosomal subunit [Thalassiosira pseudonana CCMP1335]	63.94	4e-177	sp|P35684|RL3_ORYSJ	60S ribosomal protein L3 OS=Oryza sativa subsp. japonica GN=RPL3 PE=2 SV=2	219	3e-66	COG0087	Ribosomal protein L3	J	Translation, ribosomal structure and biogenesis	K02925|1|0.0|518|egr:104420002| large subunit ribosomal protein L3e	GO:0006412//translation	GO:0003735//structural constituent of ribosome	GO:0005840//ribosome
109	XP_002289465.1	predicted protein, partial [Thalassiosira pseudonana CCMP1335]	19003.6	0.053	1	1	0.64	0.133	0.02138	XP_002289465.1	HRVIFILGGPGAGKGTQSEQIVSTYKCVHLSVGELLRSGAEKEEFEHAELVKECLVQGKIVPVEVSLGLLRIAMDEKANEDCDKGYGCRIFLVDGFPRNFDNVNGWIKNMPSYTAVLGALVYNCPMVVLEQRILSRAETSGRSDDNLDSAKRRFSTFQKETEPVVRALE	100	1e-123	gi|223999585|ref|XP_002289465.1|	predicted protein [Thalassiosira pseudonana CCMP1335]	42.86	1e-43	sp|Q29561|KCY_PIG	UMP-CMP kinase OS=Sus scrofa GN=CMPK1 PE=1 SV=1	125	1e-33	COG0563	Adenylate kinase or related kinase	F	Nucleotide transport and metabolism	K13800|1|2e-36|130|mis:MICPUN_88986| UMP-CMP kinase [EC:2.7.4.- 2.7.4.14]!K00939|3|5e-35|132|vcn:VOLCADRAFT_121426| adenylate kinase [EC:2.7.4.3]	GO:0006139//nucleobase-containing compound metabolic process;GO:0016310//phosphorylation	GO:0019201//nucleotide kinase activity;GO:0005524//ATP binding	-
110	EED95284.1	hypothetical protein THAPSDRAFT_27083 [Thalassiosira pseudonana CCMP1335]	52984.4	0.019	1	1	0.57	0.055	0.001363	EED95284.1	MTSPAPADAAADDAANYDLTSLISPYLDLHMMFPLLEYIDSLISTGSVSYSSSDVAQARLKLLKPTHMVDYAMDIYREVHGENAEIPKDMEDQKVEVFRELEELREGQMKLDELFRNEEVRANLVQNNQWNVKSLIAATSYGITSDTIAAYYKFAKFNFDCGDYQQGPAAKSSPAEDEKTGNPNMYYLTSIDTTLLQVLWGKLSCEILVEDWEEASVALVAVKTAIDLFVFWNDASGKGLESMVELFTSEKYLQAVTTHAPHLLRYLTAAVLLCKRRAAKKAGSNSNAEGRRLLRDLVKVMQQCEYSDPIVEFVDKLSVKFDFEAAQSQLARCETVLSSDFFLCKQTELFMEEARVFVFENYCRIHHKIDLTTLGEKLAMDRDRAERWIVDLIRNALLD…	100	0	gi|223996335|ref|XP_002287841.1|	hypothetical protein THAPSDRAFT_27083 [Thalassiosira pseudonana CCMP1335]	37.53	3e-87	sp|Q1LUA8|EI3EB_DANRE	Eukaryotic translation initiation factor 3 subunit E-B OS=Danio rerio GN=eif3eb PE=3 SV=2	-	-	-	-	-	-	K03250|1|4e-96|300|ppp:PHYPADRAFT_106353| translation initiation factor 3 subunit E	GO:0006413//translational initiation	GO:0003743//translation initiation factor activity	GO:0005737//cytoplasm
111	EJK74741.1	hypothetical protein THAOC_03561 [Thalassiosira oceanica]	41446.8	0.12	1	1	0.49	0.147	0.0157	EJK74741.1	MAARPLVSVFSTSGEKSGETTLPAVFTAPMRPDIVQFVHTNMNKNNRQAYAVSPWAGKQVSASSWGTGRAVARIPRVGGGGTSRSGQGAFGNMCRGGRMFAPTKTWRKWHRKINTTQKRYAVASALAASAVPALVMARGHKVDDVPEIPLVVDTALESTAKTSAAKDILAAIGALADVEKAADSKKIRAGKGKARNRRYTLRRGPLVVYKSNDGVEQAFRNLPGVELCCVDRLNLLQLAPGGHMGRFCIWSQAALDALNDIYGADGKRIPEDIMANADLARIINSDEVQSVLNPAKRANKKYLRKKNPLKSLKALAKLDPYAAAARESEQRAEAARKSDRAAVLAKKRETAKAKKQYKAQGKAFYEKVSKQGDVCADGFAIA	100	0	gi|397641595|gb|EJK74741.1|	hypothetical protein THAOC_03561 [Thalassiosira oceanica]	61.3	6e-115	sp|P49691|RL4B_ARATH	60S ribosomal protein L4-2 OS=Arabidopsis thaliana GN=RPL4D PE=1 SV=2	200	1e-60	COG0088	Ribosomal protein L4	J	Translation, ribosomal structure and biogenesis	K02930|1|3e-127|374|zma:100194262| large subunit ribosomal protein L4e	GO:0006412//translation	GO:0003735//structural constituent of ribosome	GO:0005840//ribosome;GO:0043231//intracellular membrane-bounded organelle
112	EED91521.1	26S proteasome ATPase regulatory subunit [Thalassiosira pseudonana CCMP1335]	47504.4	0.222	1	2	0.69	0.124	0.02383	EED91521.1	MIDDETASMSISELRQRIHLIDNDIRVMKSDIQRIQHESRGQRERIRENIEKVKLNKQLPYLVGNVVEVLEPEAEDGLEDEENQGAEEDGGAMDVNANRKTRSAVIRTSTRQTIYLPVPGLVDTDELRPSDLIGTNKDSYLILEKLPAEFDSRVKAMEVDERPTEEYSDIGGADKQIQELIEAVVLPMTHKDMFDAIGIKPPKGVLLHGPPGTGKTLLARACANQTNAVFLKLAGPQLVQMFIGDGAKLIRDAFELAKEKIADGTSNGAIIFIDELDAIGTKRFGGDQSGDREVQRTMLELLSQLDGFGSNDMIKVIAATNRPDVLDPALLRSGRLDRKIELPHPSEEARSKIMRIHSRKMNVSPEVVFEELARSCEDFNGAQLKAVCVEAGMLALRNE…	100	0	gi|224003485|ref|XP_002291414.1|	26S proteasome ATPase regulatory subunit [Thalassiosira pseudonana CCMP1335]	67.76	0	sp|Q9SEI2|PS6AA_ARATH	26S proteasome regulatory subunit 6A homolog A OS=Arabidopsis thaliana GN=RPT5A PE=1 SV=1	330	1e-108	COG1222	ATP-dependent 26S proteasome regulatory subunit	O	Posttranslational modification, protein turnover, chaperones	K03065|1|0.0|597|nnu:104610843| 26S proteasome regulatory subunit T5	GO:0010498//proteasomal protein catabolic process;GO:0009553//embryo sac development;GO:0010255//glucose mediated signaling pathway;GO:0009555//pollen development	GO:0008233//peptidase activity;GO:0017111//nucleoside-triphosphatase activity;GO:0005524//ATP binding	GO:0008540//proteasome regulatory particle, base subcomplex;GO:0005737//cytoplasm;GO:0005886//plasma membrane
113	XP_002286270.1	DnaJ chaperone, partial [Thalassiosira pseudonana CCMP1335]	34971.7	0.031	1	1	0.55	0.199	0.04021	XP_002286270.1	KRDFYDVLGVGKSADKGEIKKAYFKLAKKYHPDTNKVSSRTAADKFKEATEAYEVLSDDKQRQLYDAYGHAGVDPNAQFGGGGGGNPFEGFQGFSGFSGGDGSFHFQQSGSQEIDPEELFEAFFGGMGGGGRRRNRGPRKGSDLQMHVRLSFTEAVMGAKKDLHLRYQIHNKKNNQMEVKERDVTVDIPAGIDNGMNLRLTGQGAEGDPGAPRGNLIVQVLVDNDEYFHRDGADVHTECPISLTQAVLGGTVDVRTLTGIVEMKIPKGTQVASKLMLRGKGIPHLHSDGKRKGNHIVHLEIEIPKKVSKRQEELLREF	100	0	gi|223993173|ref|XP_002286270.1|	DnaJ chaperone [Thalassiosira pseudonana CCMP1335]	36.34	7e-56	sp|A0AIS3|DNAJ_LISW6	Chaperone protein DnaJ OS=Listeria welshimeri serovar 6b (strain ATCC 35897 / DSM 20650 / SLCC5334) GN=dnaJ PE=3 SV=1	222	2e-68	COG0484	DnaJ-class molecular chaperone with C-terminal Zn finger domain	O	Posttranslational modification, protein turnover, chaperones	K03686|1|4e-37|139|vcn:VOLCADRAFT_121529| molecular chaperone DnaJ	GO:0006457//protein folding	GO:0031072//heat shock protein binding;GO:0051082//unfolded protein binding	-
114	XP_002287868.1	predicted protein [Thalassiosira pseudonana CCMP1335]	13381.3	0.069	1	1	0.19	0.069	0.002762	XP_002287868.1	MARERKAKPDLVSRDYTIHLAKHTHKTTFKAKTPRGIKKIKEFAQKAMGTKDVRIDTDVNKFVWAQGVRNPPKRIRVRLSRKRNEDEDAEEKLYTLVQLVKVSTFKGLSTENVDSA	100	4e-69	gi|223996389|ref|XP_002287868.1|	predicted protein [Thalassiosira pseudonana CCMP1335]	60.38	2e-38	sp|Q9XGL4|RL31_CYAPA	60S ribosomal protein L31 OS=Cyanophora paradoxa GN=RPL31 PE=3 SV=1	60.5	2e-11	COG2097	Ribosomal protein L31E	J	Translation, ribosomal structure and biogenesis	K02910|1|2e-37|125|ccp:CHC_T00009180001| large subunit ribosomal protein L31e	GO:0006412//translation	GO:0003735//structural constituent of ribosome	GO:0005840//ribosome
115	AIR75422.1	RNA polymerase beta' subunit (chloroplast) [Cyclotella sp. L04_2]	169203	0.062	7	7	0.75	0.057	0.004722	AIR75422.1	MKDYIYQNTLINKKQLKELLGWSFSKYDSMQASLLADELKYLGFKYATQAGISISIEDLKVPQTKNEMLEKANKDIENAEKICLKGKITNVERFQKIIDTWSIASESLKDNVVSYFKAYDPLNSVYIMAFSGARGNLSQVRQLVGMRGLMADPSGEIMRVPIKKNFREGLTITDYLMSGYGARKGIVDTALKTANSGYLTRRLIDIAQDIIIREKDCLTYSSFRIDTSNKLDNEQLIGRILLKSVYDPKTEKLITSPNTAITSELLTLFKQKSVSKFYIRSPLTCNLYHSICQMCYGWDLSNQNLVDLGEAIGILAGQSIGEPGTQLTMRTFHTGGIFTSEARQQIISPKDGIIKFSKILKTVILRTNRGEDVLVTKNSGSLILIPEQFDQSIIQIELL…	100	0	gi|691189908|gb|AIR75422.1|	RNA polymerase beta' subunit (chloroplast) [Cyclotella sp. L04_2]	82.15	0	sp|A0T0Q9|RPOC2_THAPS	DNA-directed RNA polymerase subunit beta'' OS=Thalassiosira pseudonana GN=rpoC2 PE=3 SV=1	562	4e-174	COG0086	DNA-directed RNA polymerase, beta' subunit/160 kD subunit	K	Transcription	K03046|1|9e-149|489|ccp:CHC_805| DNA-directed RNA polymerase subunit beta' [EC:2.7.7.6]	GO:0006351//transcription, DNA-templated	GO:0003899//DNA-directed RNA polymerase activity;GO:0003677//DNA binding	GO:0009507//chloroplast
116	EJK65412.1	hypothetical protein THAOC_13729 [Thalassiosira oceanica]	51522.1	0.053	1	1	0.81	0.091	0.02969	EJK65412.1	MPKHKHSRHRDDRRGGGSDAPYHREDAKSRGGKRSRHGGDDEEDEFGRSKSRRDRKKNKVGKNGSKRDGPAPDDTEPCPTFDSMSLYEAGPSCGGVYAYGFERPSAIQQRAIRPIVRGRDVIAQSQSGTGKTAVFSISALQLLDDRVKDPQVMVLSPTRELAEQTQRVVASLGDFMSAKCHACIGGRSLGDDRKALQAGCQVVSGTPGRVYDLIKRGDLTTRDLKAFIIDEADEMLNKGFKEQIYDIYRYLPPSTQVVLVSATLPVEVLEMTDKFMQDPVRILVKRDELTLEGIRQFYVAVEKEDWKLDTLIDLYDSLTVTQAVIFCNTKQKVDWLTGKMRESNFTVSAIHGDMAQEDREKVMEEFRSGSSRVLIATDLWGRGIDVQQVSLVVCYDLPP…	100	0	gi|397619807|gb|EJK65412.1|	hypothetical protein THAOC_13729 [Thalassiosira oceanica]	70.68	0	sp|Q9VHS8|IF4A3_DROME	Eukaryotic initiation factor 4A-III OS=Drosophila melanogaster GN=eIF4AIII PE=1 SV=1	292	7e-92	COG0513	Superfamily II DNA and RNA helicase	L	Replication, recombination and repair	K13025|1|0.0|551|olu:OSTLU_26958| ATP-dependent RNA helicase [EC:3.6.4.13]	GO:0001666//response to hypoxia;GO:0006413//translational initiation;GO:0006397//mRNA processing	GO:0003743//translation initiation factor activity;GO:0008026//ATP-dependent helicase activity;GO:0005524//ATP binding	GO:0035145//exon-exon junction complex;GO:0005730//nucleolus;GO:0016607//nuclear speck;GO:0016020//membrane
117	AFM78112.1	translation elongation factor-like protein, partial [Skeletonema costatum]	33937.8	0.344	3	7	0.71	0.135	0.03435	AFM78112.1	VTIQCNTKEFFTDKYHYTIVDAPGHKDYIKNMITGSATADVGLLLVPAEKGGFEAAIAKADAKLGVEEGQTRQHARLLYLLGVEQLIVGINKMDSCNWDEGRFNEIKEEFVKMLQMIGFKPKKIPFIPYSGFNGDNLVEKSDKCPWYKGWKANITPKKAVEGFTIVEALNNFIQPPKREPTLPVRLPISNIYNIKGVGQIICGTVEQGTLLPGDVIGICPSGLKDKKIFSIEQHKKVLDKAAPGDSVGLSIKGITKDEKVQPGDIIYVQRDGELKPTKSFTAMVSVQEHPGVLKPGYAPVVFCRT	100	0	gi|392522647|gb|AFM78112.1|	translation elongation factor-like protein, partial [Skeletonema costatum]	43.93	4e-85	sp|Q01765|EF1A_PODCU	Elongation factor 1-alpha OS=Podospora curvicolla GN=TEF PE=3 SV=1	235	7e-73	COG5256	Translation elongation factor EF-1alpha (GTPase)	J	Translation, ribosomal structure and biogenesis	K03231|1|2e-101|308|apro:F751_6279| elongation factor 1-alpha	GO:0006414//translational elongation;GO:0006184//GTP catabolic process	GO:0003746//translation elongation factor activity;GO:0003924//GTPase activity;GO:0005525//GTP binding	-
118	XP_002296348.1	bacterial protein translation initiation factor 2 [Thalassiosira pseudonana CCMP1335]	62689.7	0.053	3	5	0.73	0.073	0.007826	XP_002296348.1	MTVGELAEAIGETPVSVIKFLMVDLGVMAAISQTLDPPTCEAVAEGFGKVVAGEDDEYDDDEDDEDDEDTALDLGVAWDEDDDEDLVPRPPVVTIMGHVDHGKTSLLDAIRNTRVTAGEAGGITQAINAYQVEHEGSPITFIDTPGHAAFTDMRERGANTADMIILVVAADDSVKQQTADSIACARQAGVPLLVAVNKIDLPTADVNRVLSDLAGYEVLVEDLGGEVLCSQISAKEGTNLDDLLGKIMLQAEVLDLKANPNRDAQGVVIEARVEKGLGTVATTLITKGTIRVGDSFVAGEASGKVRALIGPDGKTRLKEAGPSMPISITGITGIPAAGDLMVVAEDEQTARELAASRSRIARERQSSSYQSGLMQSVAGIFSGGQKELREICVVVKADV…	100	0	gi|224005394|ref|XP_002296348.1|	bacterial protein translation initiation factor 2 [Thalassiosira pseudonana CCMP1335]	45.85	1e-159	sp|A9IMT5|IF2_BART1	Translation initiation factor IF-2 OS=Bartonella tribocorum (strain CIP 105476 / IBS 506) GN=infB PE=3 SV=1	501	9e-167	COG0532	Translation initiation factor IF-2, a GTPase	J	Translation, ribosomal structure and biogenesis	K02519|1|1e-118|376|bpg:Bathy09g02060| translation initiation factor IF-2	GO:0006413//translational initiation;GO:0006184//GTP catabolic process	GO:0003743//translation initiation factor activity;GO:0003924//GTPase activity;GO:0005525//GTP binding	GO:0005622//intracellular
119	EED96391.1	predicted protein [Thalassiosira pseudonana CCMP1335]	143296	0.01	1	1	0.64	0.161	0.03366	EED96391.1	MNYYPDRIADDDDGDDNISCCSADIEGGVAVASGAATSQHNQAAAVDHHVENSATSSIGDNRHLSSSTPLKSRPWKSQDDDHDEEFDENDDCALEISRHGSSVSTSKKEANNHRSSTDGDTTQMAAMIQNERNRRLGVYSTTDAQYSGTTNNNAATSSSCDKIPSAPNSGPGLLGNIKGWLGGGRGAAATVGEPSRSRRSRSPAVQATPSHKRSDDNMKTSTHSTLNNTIDEKTDDSSTTSSDGSSSESGNDSQSETEGEFANEEMDLTPHERARIRALRYLSNACVDAGRKAKTASYIRGLERLDLKRRRDRFERELEVVETEMNKDRGVPEMGARKEVDRVSEVAAKLVEELPRTQALSRGSAGADAGAGVERGKHQSAHRQYMNLEEYADALHAFD…	100	0	gi|223994133|ref|XP_002286750.1|	predicted protein [Thalassiosira pseudonana CCMP1335]	-	-	-	-	-	-	-	-	-	-	-	-	-	-
120	EJK62386.1	hypothetical protein THAOC_17004, partial [Thalassiosira oceanica]	98541.2	0.022	2	4	0.74	0.081	0.01265	EJK62386.1	LPSLVSHRHLGWPPRPAGPHEARADSKHSKQHDRAPRQQKQPFARTAIADGGRLTEDPSPTCFTRGRISSWTSININPLTRRTQVIIQADMRFSALAFTALIGPSTAFSTKSSTPAAVCNNKLRMSTVAEPETATNPLLESDGLPKFSSIEPSQLTPAMTTIISTLESQFSGMEDKLKGQDTVGYDDVLPELEKISHPLEFAWSIASHLNGVKNGDELRAAYEENQPKVVAASMKFSQSKPIYDALVKVQDSLQGEESKEDDFVLGQKKRAVEKNIRSMTLGGVGLEDGSPEQIRFKEIKMRMAEISNSFSNNVLDATKAFGLEVTDPEDVEGVPESAKAMWAQAHLQNLIKEEKDEGKKKELEATKVDASAGPWRITLDGPSYLATMQHLPNRELRKK…	100	0	gi|397613714|gb|EJK62386.1|	hypothetical protein THAOC_17004, partial [Thalassiosira oceanica]	44.18	0	sp|Q949P2|COPDA_ARATH	Probable cytosolic oligopeptidase A OS=Arabidopsis thaliana GN=CYOP PE=1 SV=1	684	0	COG0339	Zn-dependent oligopeptidase	E	Amino acid transport and metabolism	K01414|1|0.0|608|mis:MICPUN_98128| oligopeptidase A [EC:3.4.24.70]		GO:0008237//metallopeptidase activity	-
121	EED88710.1	histone H3 [Thalassiosira pseudonana CCMP1335]	15329.5	0.081	1	3	0.43	0.072	0.002032	EED88710.1	MARTKQTARKSTGGKAPRKQLATKAARKSAPTAGGVKKPHRYRPGTVALREIRKYQKSTDLLIRKAPFQRLVREIAQDFKTDLRFQSTAVLALQEASEAYLVGLFEDTNLCAIHAKRVTIMPKDIQLARRIRGERA	100	2e-94	gi|224009486|ref|XP_002293701.1|	histone H3 [Thalassiosira pseudonana CCMP1335]	96.32	1e-91	sp|Q71H73|H33_VITVI	Histone H3.3 OS=Vitis vinifera PE=2 SV=3	-	-	-	-	-	-	K11253|1|4e-93|268|olu:OSTLU_32891| histone H3	GO:0006007//glucose catabolic process;GO:0006605//protein targeting;GO:0006334//nucleosome assembly	GO:0003677//DNA binding	GO:0000786//nucleosome;GO:0005634//nucleus
122	XP_002289250.1	NNT NAD transhydrogenase, partial [Thalassiosira pseudonana CCMP1335]	109139	0.037	2	9	0.71	0.133	0.03361	XP_002289250.1	KPIPYSDLTVGVLKETYPGEQRVSIAPESAKMLVDAGLSVIVESGAGEHAAFSDAAYVNVGCIVLPKESVYAQADIITKIRPPDEYEVPKLAKKTFVGMISPSINTDLYNELTEQETNVFALDCVPRMLSRAQTYDVLSSQANIAGYRAVIEAANNFPRFFAGQMTAAGKVPPAKVLVLGVGVAGLAAIQTAKNMGAIVRAFDVRAVTKEQVESMGATFLEVPLKEDGAGAGGYAKEMSDEYKAAQAQLMLEQARDVDVIITTALIPGRKAPVLVNQDMLDVMKPGSVLVDLAAANGGNVAQTEANKVITTENGITIIGYTDLPSRLASTSSTLFGNNVAKFLLSIGPQTTKQQGVFQIDMEDDAVQNMLISYNGEARWPDKITPYNPPPPPTLTSEVI…	100	0	gi|223999155|ref|XP_002289250.1|	NNT NAD transhydrogenase [Thalassiosira pseudonana CCMP1335]	47.47	0	sp|P11024|NNTM_BOVIN	NAD(P) transhydrogenase, mitochondrial OS=Bos taurus GN=NNT PE=1 SV=3	476	1e-155	COG3288	NAD/NADP transhydrogenase alpha subunit	C	Energy production and conversion	K00323|1|0.0|800|cre:CHLREDRAFT_139758| NAD(P) transhydrogenase [EC:1.6.1.2]	GO:0015992//proton transport;GO:0055114//oxidation-reduction process	GO:0008750//NAD(P)+ transhydrogenase (AB-specific) activity;GO:0050661//NADP binding	GO:0016021//integral component of membrane
123	EED89904.1	hypothetical protein THAPSDRAFT_8524 [Thalassiosira pseudonana CCMP1335]	112302	0.114	7	14	0.81	0.041	0.003848	EED89904.1	MIRLASLNTASTVTKSGLRTSLLCLSRSRLTSTSSSLATRSFSSKKEEDVKPKGIPYNKLTVGVPKERFPLEKRVAATPESVSKLVKPGFNVLIEKGAGSSSYFSDADYESAGAKIVEADQVWKESDIVMKLRPPTKEELTQLDNRTIISFLYPAQNPELLQQLQDQKSTAFSMDCIPRTLSRGQTYDALSSQANITGYRAVVEASNEFGRFFAGQMTAAGKVPPAKVLVVGTGVAGLAAIQTAKNMGAIVRAFDVRPVTKEQVEAMGGQFLEVDYQEDGSGAGGYAKEMSKEWHAAAAKMLGKQCEEVDIVITTAAIPGRKAPLMITKAMVDKMKSGSVTVDLAAESGGNIETTVKDEKFITDNGVTCLGYTDLASRLPTTSSSLYSNNISKFLLSMG…	100	0	gi|224007497|ref|XP_002292708.1|	hypothetical protein THAPSDRAFT_8524 [Thalassiosira pseudonana CCMP1335]	53.83	0	sp|Q13423|NNTM_HUMAN	NAD(P) transhydrogenase, mitochondrial OS=Homo sapiens GN=NNT PE=1 SV=3	486	2e-159	COG3288	NAD/NADP transhydrogenase alpha subunit	C	Energy production and conversion	K00323|1|0.0|925|vcn:VOLCADRAFT_80229| NAD(P) transhydrogenase [EC:1.6.1.2]	GO:0015992//proton transport;GO:0055114//oxidation-reduction process	GO:0008750//NAD(P)+ transhydrogenase (AB-specific) activity;GO:0050661//NADP binding	GO:0016021//integral component of membrane
124	EED91649.1	RL23a, ribosomal protein 23a 60S large ribosomal subunit [Thalassiosira pseudonana CCMP1335]	16102	0.07	1	6	0.53	0.051	0.001087	EED91649.1	MAGGAKAAAVAKKLTKSTKSKKGTRIHTKVHFYRTQTLSLERKPKYARRSVPRKSTVDKYSIIKYPLTTESSMKLIEDSNTLVFIVDIKANKRQIKQAVKDLYQIECEKVNTLITPRGLKKSYVRLSKDFDALDVANRVGVI	100	1e-81	gi|224003741|ref|XP_002291542.1|	RL23a, ribosomal protein 23a 60S large ribosomal subunit [Thalassiosira pseudonana CCMP1335]	65.25	4e-50	sp|P62752|RL23A_RAT	60S ribosomal protein L23a OS=Rattus norvegicus GN=Rpl23a PE=2 SV=1	93.2	4e-24	COG0089	Ribosomal protein L23	J	Translation, ribosomal structure and biogenesis	K02893|1|7e-48|154|egr:104431533| large subunit ribosomal protein L23Ae	GO:0006412//translation;GO:0006979//response to oxidative stress;GO:0006355//regulation of transcription, DNA-templated;GO:0009409//response to cold;GO:0009644//response to high light intensity	GO:0003735//structural constituent of ribosome;GO:0003677//DNA binding;GO:0003700//sequence-specific DNA binding transcription factor activity;GO:0000166//nucleotide binding	GO:0005618//cell wall;GO:0005730//nucleolus;GO:0022626//cytosolic ribosome;GO:0016020//membrane
125	AOE43471.1	cytochrome c oxidase subunit II, partial (mitochondrion) [Thalassiosira rotula]	22253.6	0.053	1	3	0.69	0.106	0.0162	AOE43471.1	MIFIIQCDSPALWQTYLSDPASITMEGILIFNKHLLFLLTVIVIFVAWLLLYTIYYFVEYNNKFSSKFVHSKELEIVWTSIPALILLILSTPSFTLLYAMDEISEPELTLKILGHQWFWSYEISEFNSCQKQEQSLKYVCYMMALDGLPTTKQGYFRLLETNKRVILPTNTHLRLLVSAADVLHSWTVPS	96.84	2e-124	gi|74325171|ref|YP_316591.1|	cytochrome oxidase subunit II [Thalassiosira pseudonana]	46.52	6e-50	sp|P48869|COX2_CHOCR	Cytochrome c oxidase subunit 2 OS=Chondrus crispus GN=COX2 PE=3 SV=1	124	3e-33	COG1622	Heme/copper-type cytochrome/quinol oxidase, subunit 2	C	Energy production and conversion	K02261|1|8e-51|167|bpg:BathyMg00040|	GO:0022904//respiratory electron transport chain	GO:0005507//copper ion binding;GO:0009055//electron carrier activity;GO:0020037//heme binding;GO:0004129//cytochrome-c oxidase activity	GO:0005743//mitochondrial inner membrane;GO:0070469//respiratory chain;GO:0016021//integral component of membrane
126	AIR75515.1	Clp protease ATP binding subunit (chloroplast) [Cyclotella sp. L04_2]	104826	0.036	1	5	0.69	0.101	0.01321	AIR75515.1	MFEKFTEGAVKVIMLAQEEARRMGHSFVGTEQIILGMLGQRHGIAGRALSQIKITLKQFRKDIERYIGRGTGFVGSEIPFTPRAKRILEMSIHEAHDLGVNYVGSEHILLAIINDGDGIGFRILMRSRVNFVKLKRIIFSYIDDQQENISSKSTSDKYDKVPRLTPEEARDMFFRRGQWAKEKKSTIENYSENLTQEAEDKRLDPVIGRDSEINALIKVLARRRKNNPVLVGEAGVGKTACAEGLALLMVGNDCPDFLSKHVMYNLDLGSVLAGTKYRGEFEERFKSIIEEVQEHGKTILVIDEIHTIVGAGAAEGAVDAANLLKPALARGALKVIGATTLDEYRKHIEKDPALERRFHPIIVEEPTVETTIDILKGLRPYFQSHHALLYETEALVAAA…	100	0	gi|691190001|gb|AIR75515.1|	Clp protease ATP binding subunit (chloroplast) [Cyclotella sp. L04_2]	60.79	0	sp|P49574|CLPC_ODOSI	ATP-dependent Clp protease ATP-binding subunit ClpA homolog OS=Odontella sinensis GN=clpC PE=3 SV=1	895	0	COG0542	ATP-dependent Clp protease ATP-binding subunit ClpA	O	Posttranslational modification, protein turnover, chaperones	K03696|1|0.0|847|cvr:CHLNCDRAFT_32555| ATP-dependent Clp protease ATP-binding subunit ClpC	GO:0006508//proteolysis	GO:0008233//peptidase activity;GO:0005524//ATP binding;GO:0017111//nucleoside-triphosphatase activity	GO:0009507//chloroplast
127	EED95457.1	predicted protein [Thalassiosira pseudonana CCMP1335]	85381.2	0.041	2	6	0.72	0.155	0.04959	EED95457.1	MPRPRRTAAALTIAAAVGLTAAFSPSPFGRISRNAIHTPSSQWKLNSAVVSEAEERARAAMAAEEAAKNVGPAIGKQADQMVSGGRPFPLSMIVGQDNIKQALLLSAVNNRMGGVVISGGKGTGKSVMARALHQLLPPIEVIKDSPFNIDPAGEFGIDDFLRTDLDNGGVPLEERETEVIAAPFVQVPLNVMEDRLIGSADLEESVKSGKSVFSPGLLAKAHRGVLYVDDINLLDEETANILLNVVTEGKVIVEREGISLTYPCRPLLIATFNPDEGELRDHLLDRIAIALSADAEKMDIASRVSATDSVLGFSPGAKQATPEAEKALEEAIENEDDLKTAIVFAREFLRDLTIAPSQIQYLCEEAIRAGCQGHRAEIFACEVARAAAALEGRQVTSDD…	100	0	gi|223996681|ref|XP_002288014.1|	predicted protein [Thalassiosira pseudonana CCMP1335]	56.47	4e-104	sp|O22437|CHLD_PEA	Magnesium-chelatase subunit ChlD, chloroplastic OS=Pisum sativum GN=CHLD PE=2 SV=1	704	0	COG1240	Mg-chelatase subunit ChlD	H	Coenzyme transport and metabolism	K03404|1|4e-121|382|ccp:CHC_T00008429001| magnesium chelatase subunit D [EC:6.6.1.1]	GO:0015995//chlorophyll biosynthetic process;GO:0015979//photosynthesis	GO:0016851//magnesium chelatase activity;GO:0005524//ATP binding;GO:0017111//nucleoside-triphosphatase activity	-
128	ADB27549.1	photosystem I P700 chlorophyll a apoprotein A2 (chloroplast) [Thalassiosira oceanica CCMP1005]	82157.9	0.05	3	7	0.46	0.13	0.01079	ADB27549.1	MATKFPKFSQALAQDPATRRIWYGIATAHDLEAHDGMTEENLYQKIFASHFGHLAIIFLWTAGNLFHVAWQGNFEKWVSNPLKTRPIAHAIWDPHFGEKALKAFSKGNTYPVNISFSGLYQWWYTIGFRTNQELYRASIGVLLLASVLLIAGWLHLQPKFRPSLSWFKNNESRLNHHLSGLLGFSSLAWTGHIVHVAIPASRGVHVGWDNFLTTPPHPAGLTPFFTGNWTVYAENPDTAEHAFNTADGAGTAILTFLGGFHPQTQSLWLTDIAHHHLAIAVVFIVAGHMYRTNFGIGHNMKEILDAHRPPGGRLGAGHVGLFETITNSLHMQLGLALACLGVATSLTAQHMYALTPYAYLSKDFTTEAALYTHHQYIAGFLMVGAFAHGAIFFVRDYDP…	100	0	gi|315320539|ref|YP_004072596.1|	photosystem I P700 chlorophyll a apoprotein A2 [Thalassiosira oceanica CCMP1005]	95.77	0	sp|A0T0M9|PSAB_THAPS	Photosystem I P700 chlorophyll a apoprotein A2 OS=Thalassiosira pseudonana GN=psaB PE=3 SV=1	1085	0	COG2885	Outer membrane protein OmpA and related peptidoglycan-associated (lipo)proteins	M	Cell wall/membrane/envelope biogenesis	K02690|1|0.0|1237|cme:CymeCp113|	GO:0018298//protein-chromophore linkage;GO:0015979//photosynthesis;GO:0022900//electron transport chain	GO:0016491//oxidoreductase activity;GO:0009055//electron carrier activity;GO:0000287//magnesium ion binding;GO:0016168//chlorophyll binding;GO:0051539//4 iron, 4 sulfur cluster binding	GO:0016021//integral component of membrane;GO:0009522//photosystem I;GO:0009535//chloroplast thylakoid membrane
129	ACI64234.1	member of the clp superfamily, large regulatory subunit, partial [Thalassiosira pseudonana CCMP1335]	78358.1	0.033	2	2	0.74	0.097	0.01945	ACI64234.1	ETLEQYGVDLTKLAKEGKLDPVIGRYEEIRRTLQILARRTKNNPVLIGEPGVGKTAIGEYVARLIANNEVPESMKNKRVVSLDISSLLSGAMFRGQFEERLKAVLQDIQDLSGEVILFVDELHTIVGAGKGEGSMDMSNMLKPKLARGELQLVGATTLDEYRLIEKDAALARRFQSVFVAEPSVEDTVSILRGLKNSYELHHGIRVKDEALIAAATLSDRYIADRKQPDKSIDLVDEACSRLRLEQESKPEIVWKVERDLLTKQIEQSALANEGDDAKSKARKEHVDSEVLELKKELDRLQNMWMKEKDELERGKKLQEKLDSARRELVVARKQGDLAKAAELLHAVIPSLEEEMEELEKEEGGTGHDGSAHLKMLSDYVSAEAIATVVARHTGIPVSR…	100	0	gi|224011485|ref|XP_002295517.1|	member of the clp superfamily, large regulatory subunit [Thalassiosira pseudonana CCMP1335]	55.08	0	sp|Q98G96|CLPB_RHILO	Chaperone protein ClpB OS=Rhizobium loti (strain MAFF303099) GN=clpB PE=3 SV=1	796	0	COG0542	ATP-dependent Clp protease ATP-binding subunit ClpA	O	Posttranslational modification, protein turnover, chaperones	K03695|1|0.0|743|gsl:Gasu_55830| ATP-dependent Clp protease ATP-binding subunit ClpB		GO:0017111//nucleoside-triphosphatase activity;GO:0005524//ATP binding	-
130	XP_002295632.1	mitochondrial carrier protein, partial [Thalassiosira pseudonana CCMP1335]	31280.2	0.082	1	1	0.61	0.197	0.04928	XP_002295632.1	LLKMVIAAFSGMSAATICHPLDVIRVQMQTEGNTYKGFGDAAKGIYKKDGLKDGLFAGISAAYLRQWLYGSCRIGIYAYLLENAQNANIANGLDKNAIPLSSKMLMGLTSGGIGSFVGTPSELALVRMSNDKKLPVDQRRNYKGVGECISRIAKEEGVPGLFRGAPATVLRACLLSACAMGITSEIKMRLSGSGLFGEDGKYLGGIPLLFVATLVSSFAANVVANPFDVVKSRMQAVSKSKDGSAQYSGMVDCFLQTVNNEGVLKLWSGFVPAFLKLAPYTVISLTLTDKI	100	0	gi|224011715|ref|XP_002295632.1|	mitochondrial carrier protein [Thalassiosira pseudonana CCMP1335]	36.61	2e-58	sp|Q9CR62|M2OM_MOUSE	Mitochondrial 2-oxoglutarate/malate carrier protein OS=Mus musculus GN=Slc25a11 PE=1 SV=3	-	-	-	-	-	-	K15104|1|2e-58|192|vcn:VOLCADRAFT_105677| solute carrier family 25 (mitochondrial oxoglutarate transporter), member 11	GO:0006810//transport		GO:0043231//intracellular membrane-bounded organelle;GO:0044444//cytoplasmic part;GO:0016021//integral component of membrane
131	EED89280.1	RS8, ribosomal protein 8 [Thalassiosira pseudonana CCMP1335]	22743.2	0.125	2	5	0.7	0.117	0.02009	EED89280.1	MGITREGKHKRRETGGRRAQFRKKRKFELGRPAAMTKIGEKRIHTVRCRGGNLKFRALRLDSGNFSWGTEVCTRKVRVLDVVYNASNNELVRTKTLVKGAIVLVDAHPFKSWYESHYGVKIGIKKGQAAAEEEEVKQSSHVQRKLAARQKGRSLEDAIDHQIASGRLYAKITSRPGQSGRCDGQILEGAELSFYLKQLKK	100	4e-146	gi|224009171|ref|XP_002293544.1|	RS8, ribosomal protein 8 [Thalassiosira pseudonana CCMP1335]	62.07	5e-86	sp|Q8WQI5|RS8_SPOFR	40S ribosomal protein S8 OS=Spodoptera frugiperda GN=RpS8 PE=2 SV=1	74.3	2e-15	COG2007	Ribosomal protein S8E	J	Translation, ribosomal structure and biogenesis	K02995|1|3e-84|251|aly:ARALYDRAFT_496032| small subunit ribosomal protein S8e	GO:0006412//translation	GO:0003735//structural constituent of ribosome	GO:0005840//ribosome
132	XP_002295925.1	phospholipase C, partial [Thalassiosira pseudonana CCMP1335]	49760	0.018	1	1	0.83	0.075	0.02247	XP_002295925.1	MSKPLSEYWINSSHNTYLTGDQLTSRSSVEMYVKALYRGCRCMELDIWDGGKDEFGNPVPIVYHGHTMTSKILFEDIIKSFQVFLMMHPMTYPIILSLENHCSFPFQQVMAGQLRSILGKNLYIPDEQSLLGDLPSPSQLRGMVVLKGRRPSGATDDYDTDDDAAADDMTEQQSNLLNSEYQNDGLDDSVKIAPELAKLTLFHGTKFRTWEESSQTPTYHMHSFSESRVKAFSKSIQCHKWVEYNQTHMSRAFPSGKRVDSSNYSPILAWSTGCQMVALNFQTPDDPIRINDGRFRENGEQGYVLKPPSLLSKEETDPRSAMLEVKILSGSCLPKPGGVSFGECIDPYVIVSLFDCHEGKEVTSSQTTNAVFNNGFSPIWNFEDSFHFQVQNTCVAVMQ…	100	0	gi|224004548|ref|XP_002295925.1|	phospholipase C [Thalassiosira pseudonana CCMP1335]	39.33	3e-90	sp|A5D6R3|PLD3A_DANRE	1-phosphatidylinositol 4,5-bisphosphate phosphodiesterase delta-3-A OS=Danio rerio GN=plcd3a PE=2 SV=1	-	-	-	-	-	-	K05857|1|7e-74|249|ccp:CHC_T00005154001| phosphatidylinositol phospholipase C, delta [EC:3.1.4.11]	GO:0006629//lipid metabolic process;GO:0035556//intracellular signal transduction	GO:0004871//signal transducer activity;GO:0004435//phosphatidylinositol phospholipase C activity	GO:0005622//intracellular
133	YP_316586.1	cytochrome oxidase subunit I (mitochondrion) [Thalassiosira pseudonana]	55252.7	0.028	1	1	0.46	0.196	0.03097	YP_316586.1	MATYSPQLNPIYKFVTRWLFSTNHKDIGTLYLIFGAISGVAGTALSLYIRITLAQPNGSFLEYNHHLYNVIVTGHAILMIFFMVMPTLIGGFGNWFVPLMIGAPDMAFPRMNNISFWLLPPSLLLLFASMLTEAGVGTGWTVYPPLSSATAHSGGSVDLAIFSLHLSGASSILGAINFICTIFNMRVKSLSFHNLPLFVWSVLITAFLLLLSLPVLAGAITMLLTDRNFNTTFFDPAGGGDPVLFQHLFWFFGHPEVYILILPGFGIISHIVVSTAKKPIFGYLGMVYAMFSIGVLGFIVWAHHMFTVGLDIDTRAYFTAATMIIAIPTGIKIFSWLATLWGGSIDLRTPGLFAIGFIFLFTVGGVTGVVLANSGIDIALHDTYYVVAHFHYVLSMGAV…	100	0	gi|74325167|ref|YP_316586.1|	cytochrome oxidase subunit I [Thalassiosira pseudonana]	77.25	0	sp|P26856|COX1_MARPO	Cytochrome c oxidase subunit 1 OS=Marchantia polymorpha GN=COX1 PE=3 SV=2	686	0	COG0843	Heme/copper-type cytochrome/quinol oxidase, subunit 1	C	Energy production and conversion	K02256|1|0.0|701|ota:OstapMp40| cytochrome c oxidase subunit 1 [EC:1.9.3.1]	GO:0009060//aerobic respiration;GO:0006810//transport;GO:0022900//electron transport chain	GO:0005507//copper ion binding;GO:0009055//electron carrier activity;GO:0005506//iron ion binding;GO:0020037//heme binding;GO:0004129//cytochrome-c oxidase activity	GO:0005743//mitochondrial inner membrane;GO:0070469//respiratory chain;GO:0005886//plasma membrane;GO:0016021//integral component of membrane
134	EED88740.1	microsomal signal peptidase [Thalassiosira pseudonana CCMP1335]	20387	0.106	1	1	0.74	0.108	0.02407	EED88740.1	MIDKQVIELKKLWANKRQLTFQLLNLAMIVFSALMIWKGLMFMTKSESPVVVVLSGSMEPAFQRGDILFLNNSVEKVYVGDVVVFKIKDRDIPIVHRILKVHEKPDGHVELLTKGDNNRVDDRGLYAPGQLWLEREDILGRAVGTLRYVGMVTIALNDYPVLKYVLVGMMGLFVLTSKEG	100	1e-128	gi|224009546|ref|XP_002293731.1|	microsomal signal peptidase [Thalassiosira pseudonana CCMP1335]	64.74	7e-76	sp|Q9WTR7|SC11C_RAT	Signal peptidase complex catalytic subunit SEC11C OS=Rattus norvegicus GN=Sec11c PE=2 SV=3	65.9	3e-12	COG0681	Signal peptidase I	U	Intracellular trafficking, secretion, and vesicular transport	K13280|1|1e-69|212|adu:107472689| signal peptidase, endoplasmic reticulum-type [EC:3.4.-.-]	GO:0006465//signal peptide processing;GO:0006508//proteolysis	GO:0008236//serine-type peptidase activity	GO:0016021//integral component of membrane
135	YP_009093423.1	ATP synthase CF1 alpha subunit (chloroplast) [Thalassiosira weissflogii]	54149.3	0.262	3	17	0.77	0.041	0.002198	YP_009093423.1	MINIRPDEISSIIREQIEQYDQDVKVDNIGTVLQVGDGIARVYGLDQVMSGELLEFEDKTIGIALNLENDNVGVVLMGNGRQILEGGTVKSTGQIAQIPVGEAFLGRVVNPLGLPIDGKGEIATTESRLVESMAPGIISRKSVCEPLQTGITSIDAMIPIGRGQRELIIGDRQTGKTSIAVDTIINQKSENVVCVYVGIGQKASTIAQVVNVLEQKEAMSYTIIVSASANDPATLQYIAPYAGAALAEYFMYNGKATLIIYDDLTKQAMAYRQMSLLLRRPPGREAYPGDVFYLHSRLLERAAKLSDALGGGSMTALPIIETQASDVSAYIPTNVISITDGQIFLSNDLFNSGIRPAINVGISVSRVGSAAQTKAMKQVAGKLKLELAQFAELEAFSQF…	100	0	gi|700082625|ref|YP_009093423.1|	ATP synthase CF1 alpha subunit (chloroplast) [Thalassiosira weissflogii]	93.64	0	sp|A0T0P4|ATPA_THAPS	ATP synthase subunit alpha, chloroplastic OS=Thalassiosira pseudonana GN=atpA PE=3 SV=1	798	0	COG0056	FoF1-type ATP synthase, alpha subunit	C	Energy production and conversion	K02111|1|0.0|763|ccp:CHC_845| F-type H+-transporting ATPase subunit alpha [EC:3.6.3.14]	GO:0042777//plasma membrane ATP synthesis coupled proton transport;GO:0015991//ATP hydrolysis coupled proton transport	GO:0046933//proton-transporting ATP synthase activity, rotational mechanism;GO:0005524//ATP binding;GO:0046961//proton-transporting ATPase activity, rotational mechanism	GO:0045261//proton-transporting ATP synthase complex, catalytic core F(1);GO:0009535//chloroplast thylakoid membrane;GO:0005886//plasma membrane
136	EJK58070.1	hypothetical protein THAOC_21830, partial [Thalassiosira oceanica]	8749.66	0.103	1	1	0.31	0.097	0.004652	EJK58070.1	RKVTVAPSDMIRTKLMNQPTDVKLYDGFVDCAKKTVAEGGVLSLWRGFIPIWARFAPQATLQLLSIEVIYDVMGFKGI	100	5e-52	gi|397602083|gb|EJK58070.1|	hypothetical protein THAOC_21830, partial [Thalassiosira oceanica]	43.66	1e-12	sp|Q6PH61|S2534_DANRE	Solute carrier family 25 member 34 OS=Danio rerio GN=slc25a34 PE=2 SV=1	-	-	-	-	-	-	K15106|1|9e-13|64.7|cvr:CHLNCDRAFT_48477| solute carrier family 25 (mitochondrial carrier), member 14/30!K15112|2|2e-11|61.2|osa:4335985| solute carrier family 25 (mitochondrial uncoupling protein), member 27	GO:0006810//transport		GO:0016021//integral component of membrane
137	EJK76287.1	hypothetical protein THAOC_01961 [Thalassiosira oceanica]	22771.4	0.092	1	5	0.36	0.142	0.01222	EJK76287.1	MVKHNNVIPNIHCHKKYLESSRGPLKVKLSLNQAGKKKSRRLARAARAAAIAPRPLKLLRPAVHCQTQRYSAKVRLGKGFTLEELKAAGLTAKYARTIGIAVDHRRTNKSAESLAANVARLNEYKSKVIVFPKKRMSATKSGDSSAEECKAASQYSGTVLPLVKPAKEIVLEDVPEQEVSAFTQMRLAAKETRVAGHRASVANRKE	100	6e-123	gi|397644187|gb|EJK76287.1|	hypothetical protein THAOC_01961 [Thalassiosira oceanica]	47.06	8e-40	sp|P41128|RL131_BRANA	60S ribosomal protein L13-1 OS=Brassica napus PE=2 SV=1	-	-	-	-	-	-	K02873|1|6e-41|141|ppp:PHYPADRAFT_227920| large subunit ribosomal protein L13e			GO:0030529//ribonucleoprotein complex
138	XP_002294928.1	predicted protein [Thalassiosira pseudonana CCMP1335]	40891.2	0.022	1	1	0.54	0.077	0.003152	XP_002294928.1	MTVHQPSCSTSLRSTMENTDEDTKQPTMGPPLVDIDCNLLHKDLMSVMGTVSTLDMNETLDNLPDAFKILHHPSITQSNIIAMLSPSSTIEESESSVNLLESSTDEQRNNILVKTTVGVHPYHTLEAGAPTSETLDRLRSLLDKPNTRQLFSCIGETGLDYSEGFPDKEHQLPWFQAQLDLSFEYNLPVFLHERLAFGDTLKCIDEAAEKHEGKNVPRIIVHCYTGSFVECVEYMKRGYYLSVSGYINKQGEENDEVRRCLREGIVPLDRLMIETDSPYLGFALNKDSFFEAEGASFASLNAKKKKRLKSLYPNVPSSLPLVLKAACDELNCGREKRGESLLSLEELADCTTKNAISFVNL	100	0	gi|224012551|ref|XP_002294928.1|	predicted protein [Thalassiosira pseudonana CCMP1335]	36.75	7e-22	sp|A7MQN1|TATD_CROS8	3'-5' ssDNA/RNA exonuclease TatD OS=Cronobacter sakazakii (strain ATCC BAA-894) GN=tatD PE=3 SV=2	110	2e-26	COG0084	Tat protein secretion system quality control protein TatD (DNase activity)	N	Cell motility	K03424|1|8e-16|80.9|ccp:CHC_T00004095001|		GO:0016888//endodeoxyribonuclease activity, producing 5'-phosphomonoesters	-
139	XP_002290713.1	predicted protein [Thalassiosira pseudonana CCMP1335]	30476.5	0.033	1	2	0.8	0.114	0.04845	XP_002290713.1	MSAKVILLSTFVVGYSLGFAPIQPCHRHSRSSTCSLAPRQTRSLHPLLPRYSSPDDDIVEAVIIESSSSSDETDIVIVEEELTAEQKEKIGNLVADEEWAGLSMQLAEVVRTAVVEDLKKNSRDFLNKDDYAVGDFSKEIDRRVKEEVAKMREKPEYELGDFSVVLDGKVKELVCELSGKETYEFGDLSTVIDTKVKESVAAFCGKDSYQPGDLSKELAKRTKNGVLAFTGKDDYKFGDVTKKLIKNVTGDDYKFGDVTKKLMGNLFGGDKTK	100	0	gi|224002082|ref|XP_002290713.1|	predicted protein [Thalassiosira pseudonana CCMP1335]	-	-	-	-	-	-	-	-	-	-	-	-	-	-
140	ADB27601.1	30S ribosomal protein S7 (chloroplast) [Thalassiosira oceanica CCMP1005]	17630.5	0.058	1	1	0.56	0.148	0.01987	ADB27601.1	MSRRNISKKRFPKADPTYNSYLVSLLVTRILKSGKKNLAQNIVNGAFEIIKSKTNEDPLVIFEKAIRNASPVVEVKARRIGGSTYQVPIEVSSFRATNLALRWIIQYSKQRVGRTMSSKLASEIIDTANDIGNTIKKKEETHKMADANKAFAHFRY	100	9e-112	gi|315320591|ref|YP_004072648.1|	30S ribosomal protein S7 [Thalassiosira oceanica CCMP1005]	97.44	2e-109	sp|A0T0Z9|RR7_THAPS	30S ribosomal protein S7, chloroplastic OS=Thalassiosira pseudonana GN=rps7 PE=3 SV=1	209	7e-69	COG0049	Ribosomal protein S7	J	Translation, ribosomal structure and biogenesis	K02992|1|4e-63|194|gsl:JL72_p160| small subunit ribosomal protein S7	GO:0006412//translation	GO:0003735//structural constituent of ribosome;GO:0019843//rRNA binding	GO:0015935//small ribosomal subunit;GO:0009507//chloroplast;GO:0005739//mitochondrion
141	XP_002286187.1	predicted protein, partial [Thalassiosira pseudonana CCMP1335]	8340.45	0.162	1	2	0.42	0.097	0.00459	XP_002286187.1	KDDVIEVEGSVIESLPNAMFRCTIDGAPDTQEPVLATISGKIRKNYVKILVGDRVTIELSPYDLTRGRITFRKR	100	1e-47	gi|223993007|ref|XP_002286187.1|	predicted protein [Thalassiosira pseudonana CCMP1335]	63.89	2e-29	sp|Q03IH3|IF1_STRTD	Translation initiation factor IF-1 OS=Streptococcus thermophilus (strain ATCC BAA-491 / LMD-9) GN=infA PE=3 SV=1	102	6e-29	COG0361	Translation initiation factor IF-1	J	Translation, ribosomal structure and biogenesis	K02518|1|3e-20|81.3|csv:101206284| translation initiation factor IF-1	GO:0006413//translational initiation	GO:0003743//translation initiation factor activity	GO:0009507//chloroplast
142	ABK20748.1	50S ribosomal protein L33 (chloroplast) [Thalassiosira pseudonana]	7763.05	0.172	1	2	0.74	0.035	0.00102	ABK20748.1	MAKNKGTRILITLECTECRTNINKRSAGVSRYLTQKNRRNNPQRMELKKYCPHCNKPTIHKEIK	100	2e-40	gi|118411131|ref|YP_874525.1|	50S ribosomal protein L33 [Thalassiosira pseudonana]	100	3e-41	sp|A0T0R3|RK33_THAPS	50S ribosomal protein L33, chloroplastic OS=Thalassiosira pseudonana GN=rpl33 PE=3 SV=1	103	1e-29	COG0267	Ribosomal protein L33	J	Translation, ribosomal structure and biogenesis	K02913|1|2e-23|86.7|tcc:ThcaC_p041| large subunit ribosomal protein L33	GO:0006412//translation	GO:0003735//structural constituent of ribosome	GO:0005840//ribosome;GO:0009507//chloroplast
143	YP_009093212.1	ribosomal protein L21 (chloroplast) [Roundia cardiophora]	12428.9	0.162	2	3	0.56	0.136	0.01649	YP_009093212.1	MKYAIVEISGRQFWIETGKYYDLNRIPTELGKEITLNRVLLVNNEGEILIGQPYLDSVKVKGKILEHFRSRKTIVYKMRPKKKTRKKKGHRQELTRVLIEEININ	100	4e-59	gi|700658207|ref|YP_009093212.1|	ribosomal protein L21 (chloroplast) [Roundia cardiophora]	89.52	2e-54	sp|A0T0G3|RK21_PHATC	50S ribosomal protein L21, chloroplastic OS=Phaeodactylum tricornutum (strain CCAP 1055/1) GN=rpl21 PE=3 SV=1	133	4e-40	COG0261	Ribosomal protein L21	J	Translation, ribosomal structure and biogenesis	K02888|1|1e-10|59.7|vvi:100245717| large subunit ribosomal protein L21	GO:0006412//translation	GO:0003735//structural constituent of ribosome;GO:0019843//rRNA binding	GO:0005840//ribosome;GO:0009507//chloroplast
144	EJK58017.1	hypothetical protein THAOC_21891 [Thalassiosira oceanica]	27749.6	0.186	1	4	0.66	0.08	0.005376	EJK58017.1	MSEERGRGGFGRGRGRGRGRGRGRGRGGGREENVWVPVTKLGRLVKEGKIGSIEEIFLFSIPVKEAEIIDYFLKDKLQDEVMKIMPVQKQSSAGQRTRFKAFVAVGDGAGHIGLGVKCSSEVATAIRGAILAAKLNVTPVRRGYWGRKSGMPHTVPTKVTGKCGSVRVRLIPAPRGTGLVSSPAGKRLLSMAGMDDCYTSTRGHTRTMGNFIKALFYALRNTYGYLEPDLWKENALTATPFQEHTDFLSKKAI	100	7e-165	gi|397601862|gb|EJK58017.1|	hypothetical protein THAOC_21891 [Thalassiosira oceanica]	73.15	4e-117	sp|P31009|RS2_DROME	40S ribosomal protein S2 OS=Drosophila melanogaster GN=RpS2 PE=1 SV=2	184	2e-56	COG0098	Ribosomal protein S5	J	Translation, ribosomal structure and biogenesis	K02981|1|7e-114|330|csl:COCSUDRAFT_64056| small subunit ribosomal protein S2e	GO:0006412//translation	GO:0003735//structural constituent of ribosome;GO:0003723//RNA binding	GO:0015935//small ribosomal subunit
145	XP_002294849.1	Fructose-1,6-bisphosphatase aldolase [Thalassiosira pseudonana CCMP1335]	34579.7	0.032	1	1	0.65	0.081	0.006038	XP_002294849.1	MMNNEMMKKICHAEGFIAALDQSGGSTPNALYLYGIKDDEYEVGKPSMYDAVHNMRTRIMTSKSFTGDRILAAILFEDTMNREINGVPTAEYLWKEKNIVPILKVDKGLEPEKDGVQLMKPIPELDAMCDAALAKGVFGTKMRSVINFANREGIKQIVEQQFTIGKQIMKKGLVPILEPEVNIKSPEKTEAEALLRAELLENLKMLREDQKCLFKLSLPEVDDLYEQLVSHPNVVRVVALSGGYSRAEANDLLARQHGVVASFSRALTEGLRADLTDEEFDEMLDTSIGEIFEASKASNVKKELHSHK	100	0	gi|224012393|ref|XP_002294849.1|	Fructose-1,6-bisphosphatase aldolase [Thalassiosira pseudonana CCMP1335]	62.8	1e-121	sp|P74309|ALF1_SYNY3	Fructose-bisphosphate aldolase class 1 OS=Synechocystis sp. (strain PCC 6803 / Kazusa) GN=fda PE=3 SV=1	369	2e-127	COG3588	Fructose-bisphosphate aldolase class 1	G	Carbohydrate transport and metabolism	K01623|1|1e-08|59.7|smo:SELMODRAFT_227983| fructose-bisphosphate aldolase, class I [EC:4.1.2.13]	GO:0006096//glycolytic process	GO:0004332//fructose-bisphosphate aldolase activity	-
146	EJK75371.1	hypothetical protein THAOC_02906 [Thalassiosira oceanica]	70227	0.016	1	3	0.67	0.15	0.0332	EJK75371.1	MTFLAFECAKFGNNVAKFILSIGPQTTKEKGVFQIDLEDDAVQNMLITYAGEARFPDKITPFNPPPPPVKAEEELVEKSAEELLAEADAIQRSEFVKNAGVASVAALGLLAFGLNADGEESTSLLATFALAGLAGYQVVWGVAPALHSPLMAVTNAISGMTALGGMLLLANDSTSSSLVPDTPAHWMGAIATVLSFVNIVGGFLISGKMLDLFKRPEDPKDYFELYAVPSAILLTGLAAGYASGNLDTMSGSVAIAAAICSIGAIAGLADQKTARTGNVLGVAGVTFGLAATAADMSLAGAGTAAFEQVGLLGATGSAVGAAVASQVGPTELPQTVAAFHSLVGIAAMAGAAGEYLGNVGGLDGGTLAAIYLAVFIGGITFTGSVVAYGKLAGMLDSAP…	100	0	gi|397642659|gb|EJK75371.1|	hypothetical protein THAOC_02906 [Thalassiosira oceanica]	48.64	1e-138	sp|Q13423|NNTM_HUMAN	NAD(P) transhydrogenase, mitochondrial OS=Homo sapiens GN=NNT PE=1 SV=3	381	6e-124	COG1282	NAD/NADP transhydrogenase beta subunit	C	Energy production and conversion	K00323|1|6e-135|427|cre:CHLREDRAFT_139758| NAD(P) transhydrogenase [EC:1.6.1.2]		GO:0008746//NAD(P)+ transhydrogenase activity;GO:0000166//nucleotide binding	-
147	YP_009093501.1	ribosomal protein L3 (chloroplast) [Thalassiosira weissflogii]	22069.9	0.266	1	1	0.36	0.031	0.0001672	YP_009093501.1	MSLGLLGNKIGMTQIFDESGNIIPVTILKVGPCVITQVKTTLNDGYNAIQVGYGNVSPKSLTQPQLGHLQKSNIQPLKYLKEFRVSDPNNFNVGQVLNVESFVAGQLINVTGKSIGKGFSGLQKRHNFARGPMTHGSKNHRAPGSIGMGTSPGRVLPGKKMAGQLGNKTTNIRKLKIVQVNNDENILVVKGAIPGKPGNLVSIVPSK	100	4e-146	gi|700082703|ref|YP_009093501.1|	ribosomal protein L3 (chloroplast) [Thalassiosira weissflogii]	94.2	4e-140	sp|A0T0X2|RK3_THAPS	50S ribosomal protein L3, chloroplastic OS=Thalassiosira pseudonana GN=rpl3 PE=3 SV=1	278	2e-94	COG0087	Ribosomal protein L3	J	Translation, ribosomal structure and biogenesis	K02906|1|3e-74|228|sind:105168351| large subunit ribosomal protein L3	GO:0006412//translation	GO:0003735//structural constituent of ribosome;GO:0019843//rRNA binding	GO:0005840//ribosome;GO:0009507//chloroplast
148	EJK68170.1	hypothetical protein THAOC_10674 [Thalassiosira oceanica]	97423.5	0.008	1	1	0.66	0.171	0.04368	EJK68170.1	MASDDEDEDELFQSCVSELLEDSEWPAVGGAGAGGSCNSCRDYSSRPVGTTLTVAGTPREADDRCDPETCHASPPQRTPRKPEATEALSKADVQPLRKEDALHFKDNNDPARNSQDDEPIPDKNDSKRNIQLREPSWDALASEERPVIRSVTYTRDQKCAIFASSDGVTIRVLDSMYELPLSPKRGKDNWTFSVPLKPDGATFAQMSNSTLAVVRPDSPRCVHICNLCDDLSNIAVLPLSAAVKRVELQEKVLVAMTADLRLHIFHIMHSDNPSDEVKISFITILNILHPTDSPRTLGNDGFCIGSYFDLSTSPDQPRLACKSFNGTPGSIRVYNPLKFHEVIDSAPRLDRRDSPPPARKVRRRLELVTTIDAHDHAVTRMVIGTSKRKSFLATCSSKG…	100	0	gi|397626532|gb|EJK68170.1|	hypothetical protein THAOC_10674 [Thalassiosira oceanica]	31.4	8e-09	sp|P43601|ATG18_YEAST	Autophagy-related protein 18 OS=Saccharomyces cerevisiae (strain ATCC 204508 / S288c) GN=ATG18 PE=1 SV=1	81.6	4e-15	COG3315	O-Methyltransferase involved in polyketide biosynthesis	Q	Secondary metabolites biosynthesis, transport and catabolism	K17908|1|1e-06|55.5|obr:102704495| autophagy-related protein 18	-	-	-
149	EED95315.1	RS7, ribosomal protein 7 [Thalassiosira pseudonana CCMP1335]	21257.3	0.053	1	1	0.75	0.109	0.02765	EED95315.1	MSTKIKKAGGAEPDEFEINVANELAQLELSSSELKASLRDLYITAAKEVDCGSGRKAIVIYVPYKQQKSYQKIQARLVRELEKKFSGRHVMIIAQRNILGKSYARSQKTKGLRPRSRTLTAVQDAVLEDIVYPTEITGKRTRCKVDGRRILKVYLDGRDQANVEGRTDTYAAVYGKLTNKQVSFHFSS	100	5e-121	gi|223996397|ref|XP_002287872.1|	RS7, ribosomal protein 7 [Thalassiosira pseudonana CCMP1335]	57.53	8e-65	sp|P62083|RS7_RAT	40S ribosomal protein S7 OS=Rattus norvegicus GN=Rps7 PE=1 SV=1	-	-	-	-	-	-	K02993|1|3e-61|191|vcn:VOLCADRAFT_73479| small subunit ribosomal protein S7e	GO:0006412//translation;GO:0042254//ribosome biogenesis	GO:0003735//structural constituent of ribosome	GO:0043231//intracellular membrane-bounded organelle;GO:0015935//small ribosomal subunit;GO:0022626//cytosolic ribosome;GO:0030684//preribosome
150	EJK48594.1	hypothetical protein THAOC_32593 [Thalassiosira oceanica]	198051	0.159	7	26	0.77	0.063	0.007754	EJK48594.1	MTDERTTTLAGPAHETKKSPPNKGHEAHGRGALPMDVITLQQLGIPETSIKHGLTTMESDRWIVSVEPTQVTLVDLQNQAQVTRRPIKAEAAIMNPATNILALRSGKMIQMFNLDTKSKLKSHDVDSPIVYWKWTSATNLALVTAASVYHWSSEGTSAPVKMFERHATIGANTQIINYQVSPDQKWCLLGGISAGAGGGVNGNMQLYSADKKVSQPLQGHAGAFCMVNLPGRDDPAQLLVFHEKKVDDPGHKLFVMEVGRDPSKGAPHRLPPTAIPVPAEAASDFPVSMVIDAKDDVAFLLSKMGFVYMFDIPSGKTMFRTRITQETVFVTCAQESTGAIFGITVRSGKVLRIGLNGPNLVPYIVNTLRDTDLAIKVAGRLGLPGAEHLYTQEFERLIG…	100	0	gi|397573193|gb|EJK48594.1|	hypothetical protein THAOC_32593 [Thalassiosira oceanica]	46.87	0	sp|Q68FD5|CLH1_MOUSE	Clathrin heavy chain 1 OS=Mus musculus GN=Cltc PE=1 SV=3	-	-	-	-	-	-	K04646|1|0.0|1466|gra:105779595| clathrin heavy chain	GO:0016192//vesicle-mediated transport;GO:0006886//intracellular protein transport	GO:0005198//structural molecule activity	GO:0030130//clathrin coat of trans-Golgi network vesicle;GO:0030132//clathrin coat of coated pit
151	EED93401.1	RL34, ribosomal protein 34 60S large ribosomal subunit [Thalassiosira pseudonana CCMP1335]	12876	0.071	1	8	0.43	0.151	0.01513	EED93401.1	MVDHRVTRAGRHSYSTRSNRIRTIRTPGGRHVAQKIVKTSKGPRCSDCKCALPGIKHLKATAYKNLKKRERTVSRAYGGSACGGCVKQRIVRAFLLEEQKAVKKLLAERASKK	100	2e-66	gi|224000383|ref|XP_002289864.1|	RL34, ribosomal protein 34 60S large ribosomal subunit [Thalassiosira pseudonana CCMP1335]	55.34	2e-26	sp|Q54LV8|RL34_DICDI	60S ribosomal protein L34 OS=Dictyostelium discoideum GN=rpl34 PE=3 SV=1	-	-	-	-	-	-	K02915|1|1e-23|90.9|gsl:Gasu_19110| large subunit ribosomal protein L34e	GO:0006412//translation	GO:0003735//structural constituent of ribosome	GO:0005840//ribosome
152	EJK49989.1	hypothetical protein THAOC_31088, partial [Thalassiosira oceanica]	74294.5	0.042	1	10	0.72	0.038	0.001107	EJK49989.1	VGVGGAPNSFTSASLYVGDLLPEVNEGLLYEIFNAVGPVASIRVCRDAVTRRSLGYAYVNYHQAADAERALDSMNFTDIKGKPCRIMWSQRDPSVRRSGVGNIFVKNLHEGIDNKQLYDTFSLFGNILSCKVVCDRETGLSKGYGYVHYETNEAAASAIDKLDGMLIDGKEVQVGVFMRRDTRPDQEVYTNLFIKNMPYEWDDKRLEAEFAEFGEIVSASVKMGKRKKFAKKGKKAEAKKDEDDKEDGAEDKPAEEEKPEEEEAKPAEEEAKPESTEPESLGFGFVNFATHEAAAAAVEAMNDKVYKVTEDGDEVEKALFVGRAQKKSERQAELRSKYEAEKMERIAKFQGVNLYVKNLDDAVTDDMLRDEFGGMGTITSAKIMRDAKTNNSRGFGFVC…	100	0	gi|397575959|gb|EJK49989.1|	hypothetical protein THAOC_31088, partial [Thalassiosira oceanica]	52.04	1e-136	sp|Q6IP09|PABPB_XENLA	Polyadenylate-binding protein 1-B OS=Xenopus laevis GN=pabpc1-b PE=2 SV=1	76.3	6e-15	COG0724	RNA recognition motif (RRM) domain	J	Translation, ribosomal structure and biogenesis	K13126|1|1e-131|405|cvr:CHLNCDRAFT_59028| polyadenylate-binding protein		GO:0000166//nucleotide binding;GO:0003723//RNA binding	-
153	XP_002290924.1	DNA directed RNA polymerase i, alpha subunit [Thalassiosira pseudonana CCMP1335]	185630	0.014	2	3	0.77	0.052	0.004654	XP_002290924.1	MANLNQAIIRHQPTSVQFGVYTDDEVRQRSVCEISSSVAYDALNTPLPRGLYDPLLGPTAGGGGGASAYCITCGNVQNLCPGHFGHIELCVPVYHPLFFPKLLLFMKMKCLACHHFRLSKRACRVFCTKLHLVDVGRMGEAMGLDEEMAALASKASVGGGDGKMSKQVKQEMMSSAAVLIDELLDQKMALRPPDGQSAEEVTHTMHERAVRRKILKEFQQACTKCLKCANCNAFSNKIRHDQFNKMFQVALPARNAKVSDVSREDFPANTKGKKKKKSTSSSTVDEEIDPTGGPISRKATVSTTKNIEASKQDNFMHALEVEAQCRLTWNNEPFLCSKFFGWGKGYTLFFLRAVPVPPSRFRPPVIMGNMTVEHSQNFYLSKVLELNARIRSAFATIHE…	100	0	gi|224002505|ref|XP_002290924.1|	DNA directed RNA polymerase i, alpha subunit [Thalassiosira pseudonana CCMP1335]	38.91	0	sp|P15398|RPA1_SCHPO	DNA-directed RNA polymerase I subunit rpa1 OS=Schizosaccharomyces pombe (strain 972 / ATCC 24843) GN=rpa1 PE=1 SV=2	430	2e-125	COG0086	DNA-directed RNA polymerase, beta' subunit/160 kD subunit	K	Transcription	K02999|1|0.0|912|mus:103990331| DNA-directed RNA polymerase I subunit RPA1 [EC:2.7.7.6]	GO:0006351//transcription, DNA-templated	GO:0003899//DNA-directed RNA polymerase activity;GO:0003677//DNA binding;GO:0008270//zinc ion binding	GO:0005634//nucleus
154	EED92867.1	predicted protein, partial [Thalassiosira pseudonana CCMP1335]	20919.2	0.157	2	2	0.8	0.103	0.03825	EED92867.1	FCGLKGHEMFCEVERAYIEDGFNLYGLRACVSNFSDCLDLILDRIGPDDSDDSHLTQSACTLYGLIHARYIVTAHGLDSMYNKYASKEFGTCPLVQCNGQPVLPVGVKDEIGVDTVKIFCPKCKSVYQPPPIRTRSTVDGAAFGTTFPHLFLMTFNNLVPDPLPSDSAYIPRVFGFRVHKSAGSR	100	2e-136	gi|223999315|ref|XP_002289330.1|	predicted protein [Thalassiosira pseudonana CCMP1335]	50.26	4e-58	sp|Q54PF1|CK2B_DICDI	Casein kinase II subunit beta OS=Dictyostelium discoideum GN=csnk2b PE=3 SV=1	-	-	-	-	-	-	K03115|1|2e-56|182|csl:COCSUDRAFT_22902| casein kinase II subunit beta	GO:0045859//regulation of protein kinase activity	GO:0019887//protein kinase regulator activity	GO:0005956//protein kinase CK2 complex
155	XP_002294103.1	predicted protein [Thalassiosira pseudonana CCMP1335]	73290.7	0.065	4	7	0.47	0.065	0.001636	XP_002294103.1	MNPFDQFAGELSSALPQQSQQQPPVSSDASAISSFTQQMPPQQQQFSLMAQPPSNGTGMQPPPQQPAMNGMMQSGGQMGGSMYGGMGGQQQPPAPTMGQVPGGGMYGLQPQQQMMMPSQSMTGSMMAPSPMNGGMSSGGSVMGGAGLPPPMQQNQMAPFGGGMSVASGALVPSNNQSNPYALGPPQQQQMGQPYGMAPPPPQQQQQNNPMANPFGAPVPPPQQQQQMGMDPFGLAPPASTAPSNAMMPTDPWGTAPAPPAAPTQPAQIAADPWGAAPQQHQPSNALVPSTTSNDDPFGIFGTGTPAPPAENIASAIGAPPTTNPMMQQQQQPPSASVVPPPASDDPWADMGFGPPNPDAASQPPAPLEDEGDLFGGGLGAAATRAQQEAHAAQSSSTAS…	100	0	gi|224010291|ref|XP_002294103.1|	predicted protein [Thalassiosira pseudonana CCMP1335]	-	-	-	-	-	-	-	-	-	-	-		GO:0003676//nucleic acid binding;GO:0005524//ATP binding;GO:0008026//ATP-dependent helicase activity	-
156	EJK43711.1	hypothetical protein THAOC_37816 [Thalassiosira oceanica]	131775	0.067	1	1	0.74	0.119	0.03186	EJK43711.1	MSNLPPAIDFAKTEEEICSKWAEEGTFKKQDALSLERGDKEYTFYDGPPFATGLPHYGHILAGTIKDVVTRYACQTGHHVQRRAGWDCHGLPVEYEIDQKLNITHRDQVLAMGVDKYNETCRGIVTRYTKEWERTVNRLGRWIDFENDYKTMDPTFMESVWWVFKELFNKDLVYQGYKVMPFSTACGTPLSNFEAGLNYKDVRDPAVVVSFPLRDEEGVSFVAWTTTPWTLPSNIALCVHPTMEYVKVLDKKSGARYILAKARLPQIYPEMTKKKKWTPQKAAETLEVEATFQGSELVGKKYEPIFGYFANSEGSEEYFRILSDTYVTDDAGTGIVHQAPAFGEDDYRVCLSHKVIQKGKDLPCPVDSNGMFTDQVPEVKGLHVKKADETLIKLIKDSG…	100	0	gi|397563241|gb|EJK43711.1|	hypothetical protein THAOC_37816 [Thalassiosira oceanica]	54.3	0	sp|F4JLM5|SYIC_ARATH	Isoleucine--tRNA ligase, cytoplasmic OS=Arabidopsis thaliana GN=At4g10320 PE=2 SV=1	950	0	COG0060	Isoleucyl-tRNA synthetase	J	Translation, ribosomal structure and biogenesis	K01870|1|0.0|1175|cre:CHLREDRAFT_139213| isoleucyl-tRNA synthetase [EC:6.1.1.5]	GO:0006428//isoleucyl-tRNA aminoacylation;GO:0006450//regulation of translational fidelity	GO:0004822//isoleucine-tRNA ligase activity;GO:0002161//aminoacyl-tRNA editing activity;GO:0008270//zinc ion binding;GO:0005524//ATP binding	GO:0005737//cytoplasm
157	EJK60670.1	hypothetical protein THAOC_18936, partial [Thalassiosira oceanica]	24034.1	0.116	1	6	0.57	0.122	0.01248	EJK60670.1	REVEADMILIGKKGASYFQRREFPIRAIYDCTQNPDSKQALGISEEIINSFLAGETDAVELLYTKFVSLISSTPSVRTLVPFSASEITNKGDEVFQLTSAGGDFGVERKELDVAEPQEFPNDMIFEQDPLQIVNSILPLYLNGQILRTLQESVASELAARMQSMQSASDNASALAKTLSQEYNRARQAAVTQELAGDRRRCRRSRVTGFEFEPVM	100	4e-157	gi|397610130|gb|EJK60670.1|	hypothetical protein THAOC_18936, partial [Thalassiosira oceanica]	79.69	3e-110	sp|Q06908|ATPG_ODOSI	ATP synthase gamma chain, chloroplastic OS=Odontella sinensis GN=ATPC PE=1 SV=1	207	9e-65	COG0224	FoF1-type ATP synthase, gamma subunit	C	Energy production and conversion	K02115|1|4e-74|230|ccp:CHC_T00008719001| F-type H+-transporting ATPase subunit gamma	GO:0042777//plasma membrane ATP synthesis coupled proton transport	GO:0046933//proton-transporting ATP synthase activity, rotational mechanism;GO:0005524//ATP binding;GO:0046961//proton-transporting ATPase activity, rotational mechanism	GO:0045261//proton-transporting ATP synthase complex, catalytic core F(1);GO:0009535//chloroplast thylakoid membrane;GO:0005886//plasma membrane
158	XP_002295570.1	triose-phosphate isomerase [Thalassiosira pseudonana CCMP1335]	29391.4	0.156	2	6	0.76	0.132	0.04901	XP_002295570.1	MSFSSACKRPSGSSKGTPAPEGERKYLIGGNWKCNGTIASLEKIISEFNAAGPIPANAEVVIGCPAMHIPIALMSLRDDIEIAAQNCSLTGCGAYTGEIAASQLKDMGVTWVILGHSERREGFGMAGEDSELVAKKTKKAIEEGLKVMFCIGEKKEEREAGTTMDVCASQLKPAADILSKEDWANVSIAYEPVWAIGTGLTATPEMAQETHANIRAWVAENVGQDVADAVRIQYGGSMKGANAADLLAQADIDGGLIGGASLTMDFFNCVNGVPSP	100	0	gi|224011591|ref|XP_002295570.1|	triose-phosphate isomerase [Thalassiosira pseudonana CCMP1335]	54.18	2e-85	sp|P30741|TPIS_CULTA	Triosephosphate isomerase OS=Culex tarsalis GN=Tpi PE=1 SV=2	229	2e-73	COG0149	Triosephosphate isomerase	G	Carbohydrate transport and metabolism	K01803|1|3e-89|268|csl:COCSUDRAFT_30774| triosephosphate isomerase (TIM) [EC:5.3.1.1]	GO:0050896//response to stimulus;GO:0008152//metabolic process	GO:0004807//triose-phosphate isomerase activity	GO:0009536//plastid
159	EJK74268.1	hypothetical protein THAOC_04063 [Thalassiosira oceanica]	14065.5	0.073	1	5	0.32	0.081	0.002876	EJK74268.1	MAKGKAAKKSTKKFVIDCAAPVDDKVLDIASFEKYLNERVKIEGKQGNLAPNGVQITRDRTKITVATPDAVKFSKRQLKYLSKRYLKKQQLRDYLRVIANSKNSYQLKYYQITDAGDEDADEE	100	1e-75	gi|397640699|gb|EJK74268.1|	hypothetical protein THAOC_04063 [Thalassiosira oceanica]	45.45	7e-32	sp|P52819|RL22_CAEEL	60S ribosomal protein L22 OS=Caenorhabditis elegans GN=rpl-22 PE=1 SV=3	-	-	-	-	-	-	K02891|1|5e-35|120|ppp:PHYPADRAFT_122343| large subunit ribosomal protein L22e	GO:0006412//translation	GO:0003735//structural constituent of ribosome	GO:0005840//ribosome
160	YP_004072575.1	photosystem II CP47 chlorophyll apoprotein (chloroplast) [Thalassiosira oceanica CCMP1005]	56392.6	0.234	12	75	0.57	0.134	0.01654	YP_004072575.1	MALPWYRVHTVVLNDPGRLISVHLMHTALVAGWAGSMALYELAVFDPSDPVLNPMWRQGMFVMPFMTRLGITDSWGGWSITGESVSNPGLWSFEGVALSHIVLSGMCFLAAIWHWVYWDLELFRDPRTGEPALDLPKIFGIHLLLSGLLCFGFGAFHVTGLFGPGIWVSDAYGITGKVQPVAPSWGADGFNPFNPGGIAAHHIAAGIFGILAGIFHLTVRPPQRLYRALRMGNIETVLSSSISAVFFAAFVTSGTMWYGAAATPIELFGPTRYQWDSGYFQQEIERQVEASVTEGLSESQAWSRIPDKLAFYDYIGNNPAKGGLFRSGPMDKGDGIAEAWLGHPIFRDKEGRELTVRRMPAFFETFPVILVDKDGIIRADIPFRRAESKYSIEQVGVTV…	100	0	gi|315320519|ref|YP_004072575.1|	photosystem II CP47 chlorophyll apoprotein [Thalassiosira oceanica CCMP1005]	97.05	0	sp|P49471|PSBB_ODOSI	Photosystem II CP47 reaction center protein OS=Odontella sinensis GN=psbB PE=3 SV=1	-	-	-	-	-	-	K02704|1|0.0|816|ccp:CHC_440|	GO:0009767//photosynthetic electron transport chain;GO:0018298//protein-chromophore linkage	GO:0016168//chlorophyll binding	GO:0009523//photosystem II;GO:0016021//integral component of membrane;GO:0009535//chloroplast thylakoid membrane
161	EED92544.1	eukaryotic translation initiation factor 4E [Thalassiosira pseudonana CCMP1335]	21666.7	0.047	1	2	0.72	0.063	0.005068	EED92544.1	MSSTPTPLHHKWTLWYDNPRLAPAGTDWHDNLKNLGTFQTAEEFWAIFNNIQPSSHLALNSNYHLFKEGIEPMWEDPANQNGGKFVLTIPKKEAKAGRGDEWWLFTVLAVIGETMDQSGEEVCGCVVSIRKAQDRIALWLKSCDKKACTEVGARWKKCLEVSNKTGLKYQAHKDAAASGSSFKNEVKFEV	100	9e-142	gi|224002240|ref|XP_002290792.1|	eukaryotic translation initiation factor 4E [Thalassiosira pseudonana CCMP1335]	44.57	3e-47	sp|O74743|IF4E2_SCHPO	Eukaryotic translation initiation factor 4E-2 OS=Schizosaccharomyces pombe (strain 972 / ATCC 24843) GN=tif452 PE=3 SV=1	-	-	-	-	-	-	K03259|1|7e-46|154|gmx:100499636| translation initiation factor 4E	GO:0006413//translational initiation	GO:0003743//translation initiation factor activity	GO:0005737//cytoplasm
162	XP_002295724.1	predicted protein [Thalassiosira pseudonana CCMP1335]	11358.4	0.359	4	19	0.34	0.142	0.01301	XP_002295724.1	MSGRGKGGKGLGKGGAKRHRKVLRDNIQGITKPAIRRLARRGGVKRISGLIYEETRGVLKVFLENVIRDSVTYTEHARRKTVTAMDVVYALKRQGKTLYGFGG	96.34	3e-52	gi|413947466|gb|AFW80115.1|	hypothetical protein ZEAMMB73_313798 [Zea mays]	98.78	2e-52	sp|Q9U7D0|H4_MASBA	Histone H4 OS=Mastigamoeba balamuthi PE=3 SV=3	-	-	-	-	-	-	K11254|1|2e-52|164|ats:F775_29706| histone H4	GO:0009414//response to water deprivation;GO:0006334//nucleosome assembly	GO:0003677//DNA binding	GO:0000786//nucleosome;GO:0005730//nucleolus;GO:0009579//thylakoid;GO:0009507//chloroplast;GO:0005886//plasma membrane
163	EJK45982.1	hypothetical protein THAOC_35377 [Thalassiosira oceanica]	33712.8	0.091	1	1	0.83	0.078	0.02836	EJK45982.1	MFMRIAPELYLKMLVVGGLDRVYEIGRQFRNEGIDLTHNPEFTTCEFYQAYADYEDLMDMTEEMISGMVKDITGGYKIKYSPKPGADEVEIDFTPPFKRISMIEGIEEKIGKKLPAFDDPKIDAKLENILEEHGLECTPPLTTARLLDTLVGEFLEDNIVHPTFITEHPQIMSPLAKYHRSKPHLTERFELFACGRELANAYTELNNPVVQYQRFLEQASQGKEGDDEAMVMDDSFITALEHGLPPTGGWGLGIDRLTMFLTNRSNIKEVLLFPAMKPTDEQLAIVNAHKAANQKS	100	0	gi|397568150|gb|EJK45982.1|	hypothetical protein THAOC_35377 [Thalassiosira oceanica]	67.48	3e-135	sp|Q99MN1|SYK_MOUSE	Lysine--tRNA ligase OS=Mus musculus GN=Kars PE=1 SV=1	300	1e-97	COG1190	Lysyl-tRNA synthetase (class II)	J	Translation, ribosomal structure and biogenesis	K04567|1|4e-134|395|cam:101489914| lysyl-tRNA synthetase, class II [EC:6.1.1.6]	GO:0006414//translational elongation;GO:0006430//lysyl-tRNA aminoacylation	GO:0003746//translation elongation factor activity;GO:0004824//lysine-tRNA ligase activity;GO:0005524//ATP binding;GO:0000287//magnesium ion binding	GO:0005853//eukaryotic translation elongation factor 1 complex
164	AIR75501.1	ribosomal protein L18 (chloroplast) [Cyclotella sp. L04_2]	15497.6	0.074	1	2	0.52	0.124	0.01134	AIR75501.1	MKFSKRVLLRLKNKNKKLKPDKYKKLKRESVRGLIKGTLERPRLSVFRSNENIYAQIIDDLTSKTLVSCSTLDRDIKLNSENGRTCNASRLMGEKLANLSKKKNITKIVFDRGPYLYHGRIKALADGARAGGLQF	100	3e-73	gi|691189987|gb|AIR75501.1|	ribosomal protein L18 (chloroplast) [Cyclotella sp. L04_2]	92.52	6e-68	sp|A0T0Y8|RK18_THAPS	50S ribosomal protein L18, chloroplastic OS=Thalassiosira pseudonana GN=rpl18 PE=3 SV=1	128	2e-37	COG0256	Ribosomal protein L18	J	Translation, ribosomal structure and biogenesis	K02881|1|4e-34|119|vcn:VOLCADRAFT_103908| large subunit ribosomal protein L18	GO:0006412//translation	GO:0003735//structural constituent of ribosome;GO:0019843//rRNA binding	GO:0005840//ribosome;GO:0009507//chloroplast
165	XP_002291401.1	t-complex protein 1 ETA subunit, partial [Thalassiosira pseudonana CCMP1335]	57829.7	0.032	2	3	0.78	0.085	0.01952	XP_002291401.1	MRPGIILLREGTDTSQGKAQLISNINACQAVADAVRTTLGPRGMDKLVADGRRVTISNDGATIMRLLEIEHPAAKTLVDISMSQDAEVGDGTTSVVLLAVEILKQMKPFVEEGVHPQIIIRNIRSASSIAVQKVRDLSVSFDTSTTEGEEMLLKTASTALNSKLISTHQDLFAPMIVDAVKSLSAEVDGLDDLRGMIAIKKIPGGDVRQSFLVKGVAFKKTFSYAGFEQMTKKFADPKILLLNVELELKNEKENAEVRIEDPEQYQSIVDAEWQVIYDKLDACVACGANIVLSKLPIGDLATQYFADRGLFCAGRVEDGDLKRVAKATGATIQTSTNGIFDGVMGTCAVFEEKRVGDERFNIFTGCPNSLTSTMILRGGSEQFIAESERSIHDALMVVK…	100	0	gi|224003459|ref|XP_002291401.1|	t-complex protein 1 ETA subunit [Thalassiosira pseudonana CCMP1335]	63.23	0	sp|Q9SF16|TCPH_ARATH	T-complex protein 1 subunit eta OS=Arabidopsis thaliana GN=CCT7 PE=1 SV=1	366	3e-119	COG0459	Chaperonin GroEL (HSP60 family)	O	Posttranslational modification, protein turnover, chaperones	K09499|1|0.0|627|gra:105788092| T-complex protein 1 subunit eta	GO:0006457//protein folding	GO:0005524//ATP binding;GO:0051082//unfolded protein binding	GO:0005737//cytoplasm
166	EED88448.1	atp-dependent RNA helicase [Thalassiosira pseudonana CCMP1335]	52766.9	0.121	5	7	0.64	0.032	0.0003733	EED88448.1	MGGGSNFSNSNLGGTLHSIDFSSQQLIPFEKDFYIEHPDVSKRPETEAQAWRASKQIVIVGEGIPKPCMTFEEASMPEYVLSEVIKCGFDKPTPIQSQGWPMALKGKNMVGISATGSGKTLAFLLPAMIHINAQQYLKPGEGPIVLVLAPTRELAVQIKEECDKFGASSEIKNTVVYGGVPKSKQVRSLREGVEIVIATPGRLIDHLEQGNTNLKRVTYLVLDEADRMLDMGFEPQLRKIVSQIRPDRQVLMWSATWPKEVQNLARDYLSDFYQVTVGSLDLAGNKDVTQMIDVCSDQDKYRNLLRYLRENLTSKDRVLVFVETKKGCDMLTRSLRMDGFQARAMHGDKSQEERDWVLREFKSCQATLLVATDVAARGLDVDDIKMVVNFDFPNDTETY…	100	0	gi|224010271|ref|XP_002294093.1|	atp-dependent RNA helicase [Thalassiosira pseudonana CCMP1335]	59.86	0	sp|P0CQ76|DBP2_CRYNJ	ATP-dependent RNA helicase DBP2-A OS=Cryptococcus neoformans var. neoformans serotype D (strain JEC21 / ATCC MYA-565) GN=DBP2 PE=3 SV=1	313	1e-100	COG0513	Superfamily II DNA and RNA helicase	L	Replication, recombination and repair	K12823|1|0.0|566|csl:COCSUDRAFT_65263| ATP-dependent RNA helicase DDX5/DBP2 [EC:3.6.4.13]		GO:0003676//nucleic acid binding;GO:0005524//ATP binding;GO:0008026//ATP-dependent helicase activity	-
167	EJK50540.1	hypothetical protein THAOC_30460, partial [Thalassiosira oceanica]	66598	0.024	1	1	0.76	0.085	0.01596	EJK50540.1	GRAAGPDDVPRGPPAQHNDALPRRLRPTLPRDAGRRHVRRRRRGPVADRRGLAPRRVEAQGALVGVRRGDDGDRARGRRRAGGAGEGGGERPAVEQGFWRDVCGCYVSDEYDWMSCNASVLGLGLWPGGKRKTTAKPRDELRGRKQEHFAGHSIPLPPYVNLPSVQSIHDAASRFGLPLMLKSRKGAYDGRGNTVLKSTDDAAVSSALSDLGLTESDLPNDALYAEGWIDFRSEVAVMVVRSTTGETRAYPATTAIQTDSICRVVLVPARNVAPDVRERCESVAMAAVDCLGDGATGVFGVELFLVNKPGGGLDVLLNEVAPRPHNTGHYTQDACAVSQFENHLRAVCGLPLGDTGLVVGAAAMVNVLGAPSGGIEETMKGVNAAMTMPRTSVHWYGKG…	100	0	gi|397577316|gb|EJK50540.1|	hypothetical protein THAOC_30460, partial [Thalassiosira oceanica]	50.72	3e-127	sp|P0CQ36|PUR6_CRYNJ	Phosphoribosylaminoimidazole carboxylase OS=Cryptococcus neoformans var. neoformans serotype D (strain JEC21 / ATCC MYA-565) GN=ADE2 PE=3 SV=1	311	2e-96	COG0041	Phosphoribosylcarboxyaminoimidazole (NCAIR) mutase	F	Nucleotide transport and metabolism	K11808|1|9e-130|396|smo:SELMODRAFT_121407| phosphoribosylaminoimidazole carboxylase [EC:4.1.1.21]	GO:0006189//'de novo' IMP biosynthetic process	GO:0046872//metal ion binding;GO:0004638//phosphoribosylaminoimidazole carboxylase activity;GO:0005524//ATP binding;GO:0034023//5-(carboxyamino)imidazole ribonucleotide mutase activity	-
168	EJK53834.1	hypothetical protein THAOC_26649 [Thalassiosira oceanica]	16963	0.083	1	1	0.64	0.133	0.02169	EJK53834.1	MVAAADSLVWELVKNNNSFMRKKSGRTSRSGSIRFSVERGNLTNKSSYKYSGLANSKTIDISSVGDNKAALTLKTKKAATSGKSGKTEIALNKDFRRSEKTIKSQATDNYYRPDLKSAALAKYTVVYRSNRVAKGVKKAVPVKKGRGNSEAASDDE	100	1e-66	gi|397587168|gb|EJK53834.1|	hypothetical protein THAOC_26649 [Thalassiosira oceanica]	41.67	8e-21	sp|O82204|RL281_ARATH	60S ribosomal protein L28-1 OS=Arabidopsis thaliana GN=RPL28A PE=1 SV=1	-	-	-	-	-	-	K02903|1|3e-24|94.7|jcu:105631499| large subunit ribosomal protein L28e	-	-	-
169	ADB27544.1	ATP synthase CF0 subunit II B' chain (chloroplast) [Thalassiosira oceanica CCMP1005]	17353.3	0.179	2	7	0.65	0.058	0.002298	ADB27544.1	MINPSILISNSEVSGPGGLFDIGATLPLVAIQFILLMVLLNIILYSPLLTIIEERKEYILSHLAEASEKLAQAKELTTQYEQDLETARKEAQLEIANSQNIHKEILDIELDISQKYIDNLLETISSDLLNKKKTALDTLDSSVQALCTEVESKLSI	100	2e-106	gi|315320534|ref|YP_004072590.1|	ATP synthase CF0 subunit II B' chain [Thalassiosira oceanica CCMP1005]	92.31	4e-98	sp|A0T0P1|ATPX_THAPS	ATP synthase subunit b', chloroplastic OS=Thalassiosira pseudonana GN=atpG PE=3 SV=1	108	5e-29	COG0711	FoF1-type ATP synthase, membrane subunit b or b'	C	Energy production and conversion	K02111|1|2e-17|82.0|gsl:Gasu_40630| F-type H+-transporting ATPase subunit alpha [EC:3.6.3.14]!K02109|2|6e-16|73.9|ppp:PHYPADRAFT_142087| F-type H+-transporting ATPase subunit b	GO:0030168//platelet activation;GO:0051258//protein polymerization;GO:0015986//ATP synthesis coupled proton transport;GO:0007165//signal transduction	GO:0005102//receptor binding;GO:0015078//hydrogen ion transmembrane transporter activity;GO:0030674//protein binding, bridging;GO:0005524//ATP binding	GO:0016021//integral component of membrane;GO:0005577//fibrinogen complex;GO:0045263//proton-transporting ATP synthase complex, coupling factor F(o);GO:0009535//chloroplast thylakoid membrane
170	XP_002287277.1	hypothetical protein THAPSDRAFT_21258 [Thalassiosira pseudonana CCMP1335]	64107.9	0.066	3	3	0.71	0.099	0.01522	XP_002287277.1	MFGGAGKKKKEESLSSVLSPANPPKGGSNQSITGFDPEGLERAAKAARELDSSRNAAAAIDLIKTQEATKQHEAASKRAEMEAYSQQMRQQNIQAEAEEARKTLEAQTQHERHRSEYRDELERKRQVDMLNAQKYMQDEQLKKQEEMVERQEAMRRKTAEIEADLRTKTELAKTRAEAEGRIRQERENHDLILEKVHLEAVENRDTVLKAIEDGGKMLGEGLSNYLTDGEKLRNTAFMVSLAAVGVYSAKTGAGIAGRFIEARLGKPSLVRETSRVAASQILKHPISSIQRLTGIGMKSQDALKGIVLEEGLDSQLRKIAVSTAHTKKNRAPFRHLLLHGPPGTGKTMFAKGLAHHSGLEFAILTGGDIAPLGRDAVTEIHKLFEWAKTSRKGLLLFVD…	100	0	gi|223995187|ref|XP_002287277.1|	hypothetical protein THAPSDRAFT_21258 [Thalassiosira pseudonana CCMP1335]	50.65	0	sp|Q58E76|ATD3A_XENLA	ATPase family AAA domain-containing protein 3-A OS=Xenopus laevis GN=atad3-a PE=2 SV=1	90.9	7e-18	COG1223	Predicted ATPase, AAA+ superfamily	R	General function prediction only	K17681|1|5e-170|498|ccp:CHC_T00004941001| ATPase family AAA domain-containing protein 3A/B		GO:0017111//nucleoside-triphosphatase activity;GO:0005524//ATP binding	-
171	EJK46643.1	hypothetical protein THAOC_34681 [Thalassiosira oceanica]	28736	0.105	1	2	0.76	0.046	0.002733	EJK46643.1	MAKKSSKSSKAKAPAKAPSKADPLFPSKPRSFGVGGDVRPSGRDLSRFVRWPKYVRIQRQRAVLYQRLKVPPSINQFTKAIGKNEAASVFTLLNKYRPETPAQKKQRLKETAAGKAKAAGVPHQLKFGLKHVTTLVEEKKASLVLIACDVNPIELVLWLPALCRKMEVPFLIVKDKARLGTLVHQKTSAVVALTGVNKEDEKQLQIFRDLGIEKFNDNTDLMRKWGGGIMGLKTQAKLDKRAKALAVEEAKKQASLKR	100	7e-165	gi|397569278|gb|EJK46643.1|	hypothetical protein THAOC_34681 [Thalassiosira oceanica]	54.89	3e-82	sp|P0DJ14|RL7A_TETTH	60S ribosomal protein L7a OS=Tetrahymena thermophila GN=RPL7A PE=1 SV=1	63.2	5e-11	COG1358	Ribosomal protein L7Ae or related RNA K-turn-binding protein	J	Translation, ribosomal structure and biogenesis	K02936|1|9e-83|252|ccp:CHC_T00010252001| large subunit ribosomal protein L7Ae			GO:0030529//ribonucleoprotein complex
172	EJK46744.1	hypothetical protein THAOC_34573 [Thalassiosira oceanica]	26715.3	0.036	1	10	0.37	0.242	0.04529	EJK46744.1	MKLAIAALTAATASAFAPAQTDRSSTALNVQWTEGTKALPFGSSPDTLDGSLPGDVGFDPIGFSTQPFASFNNPLYVEGNFMSDLEWLREAELAHGRIAQLAVVGFLWPGLFGTLPGAEGYADFSELNPFKALSTVPESAIYQIIGGCAWFEYQRVVRIKEQGANRVVGDIGIGYPGAFNPLNLNYTPEEFAEKQLQEIKHCRLAMIAAFGLICQANNSGTDVISQLAPAFEAPEYAAKAGYFLPQGI	100	2e-168	gi|397569437|gb|EJK46744.1|	hypothetical protein THAOC_34573 [Thalassiosira oceanica]	31.75	8e-15	sp|P04778|CB1C_ARATH	Chlorophyll a-b binding protein 1, chloroplastic OS=Arabidopsis thaliana GN=LHCB1.3 PE=1 SV=1	-	-	-	-	-	-	K08907|1|1e-26|106|ccp:CHC_T00008505001|	GO:0009765//photosynthesis, light harvesting		GO:0016020//membrane;GO:0009507//chloroplast
173	EED89061.1	coatomer protein subunit gamma [Thalassiosira pseudonana CCMP1335]	101271	0.021	1	2	0.61	0.161	0.03045	EED89061.1	MGDQQDDGLNVNTLMKEVTSALDKFKLEDDEPGHSGGNYYSPYANLEKAAVLQEARCFHDPTAVRESPRKCCTVIAQLLHLTNTGQYLNSAEATEVFFGVTKLFMSDDASLRRMVYLFIKDVAETCDPDDVIIVTSSLTKDMTCDVDLYRANALRVLARIIDGAMLGAIERYVKQAVVDSSGQVSSAALVSATHLFERNEESKAIVKRWIGETQEATSSPNEMVQFHAMQLLYQIKKHDRLGMQKLVTQFSQRNSLKSPLALVLLVRYTAKLLHDENGSTFARSGYAFLEASLRHKNEMVVYEAARAICALPNIEPQELSPAVNVMQLFLSSPKPAVRFAAIKTVSQVAVHHPRIVSKCNEDLEALIGDANRSIATLAITTLLKTGSENSVDRLLKQIS…	100	0	gi|224008733|ref|XP_002293325.1|	coatomer protein subunit gamma [Thalassiosira pseudonana CCMP1335]	46.22	0	sp|Q0WW26|COPG_ARATH	Coatomer subunit gamma OS=Arabidopsis thaliana GN=At4g34450 PE=1 SV=2	-	-	-	-	-	-	K17267|1|0.0|731|sind:105172881| coatomer subunit gamma	GO:0016192//vesicle-mediated transport;GO:0006886//intracellular protein transport	GO:0005198//structural molecule activity	GO:0030126//COPI vesicle coat
174	EJK56825.1	hypothetical protein THAOC_23204, partial [Thalassiosira oceanica]	89810.9	0.049	1	1	0.71	0.102	0.01621	EJK56825.1	QALAEKLVDAANADGIRLPVDSPGLVSAVNSVVEGSVLEDKPYVSRAVSLARLGVLLAQARSLSAKSVCDPISALSAERLGQYLTLDAFSTTNYDELRPHRGCVESASVLRTCLAGSTMVASSKTLKQPEGSDATCVKYAKSAPQYHGPAREAIASACKTMELELNCSEGGDAAELDDSIALLACASALGGITTLVNGSSSRIGSDSKCDAGSPSTLSTMANALESAVEQLKAALESEAKLGCDYVVSELSKREAELKAKEAEKAKRTAERAGSGNPNQKGDKDEFAGMTEAQKAKILKKRAEKEAKAAAKAKAKKAKAAGGEAALSSIFGTGTAFLYPLLSGKDLDLSNSALLESLEGAIEKLQSGGMQRKPKVALGTRDYLPEQMAIRQQAFSIIRR…	100	0	gi|397596695|gb|EJK56825.1|	hypothetical protein THAOC_23204, partial [Thalassiosira oceanica]	56.35	4e-167	sp|Q86AS6|SYHC_DICDI	Histidine--tRNA ligase, cytoplasmic OS=Dictyostelium discoideum GN=hisS PE=3 SV=1	286	2e-86	COG0124	Histidyl-tRNA synthetase	J	Translation, ribosomal structure and biogenesis	K01892|1|6e-172|509|cvr:CHLNCDRAFT_36479| histidyl-tRNA synthetase [EC:6.1.1.21]	GO:0006427//histidyl-tRNA aminoacylation	GO:0005524//ATP binding;GO:0016841//ammonia-lyase activity;GO:0004821//histidine-tRNA ligase activity	GO:0005737//cytoplasm
175	EJK58053.1	hypothetical protein THAOC_21848 [Thalassiosira oceanica]	15331.1	0.154	1	3	0.69	0.077	0.006845	EJK58053.1	MGEAGPRGRQNASGIKHRVSAGLPVAAVVNCADNSGAKNLHIISVCNIGGRLNRLPKAGSGDMVMCSVKKGKPELRKKVMPAIIVRQRKSFRRKEGVFIHFEDSAGVIVNNKGEMKGSAVSGPVAKECAELWPRIASNASSIV	100	4e-99	gi|397602023|gb|EJK58053.1|	hypothetical protein THAOC_21848 [Thalassiosira oceanica]	77.21	1e-74	sp|Q6PC14|RL23_DANRE	60S ribosomal protein L23 OS=Danio rerio GN=rpl23 PE=2 SV=1	147	6e-45	COG0093	Ribosomal protein L14	J	Translation, ribosomal structure and biogenesis	K02894|1|1e-72|217|ccp:CHC_T00001050001| large subunit ribosomal protein L23e	GO:0006412//translation	GO:0003735//structural constituent of ribosome;GO:0019843//rRNA binding;GO:0016758//transferase activity, transferring hexosyl groups	GO:0005730//nucleolus;GO:0022625//cytosolic large ribosomal subunit;GO:0009507//chloroplast
176	AIR75874.1	photosystem I protein subunit XI (chloroplast) [Roundia cardiophora]	15823.3	0.054	1	2	0.44	0.214	0.03429	AIR75874.1	MANFIKPYNDDPFVGHLATPITSSSLTRALLKNLPAYRFGLTPLLRGLEIGLAHGYFLIGPFAQLGPLRNSEIGLLAGFFSTVGLIIILTLGLTIYGAAAFGQDKSSGQELQTKKSWDQFKGGFFVGACGSAGFAFICLSSIPTFAIN	100	5e-93	gi|700658196|ref|YP_009093201.1|	photosystem I protein subunit XI (chloroplast) [Roundia cardiophora]	94.59	7e-88	sp|A0T0U5|PSAL_THAPS	Photosystem I reaction center subunit XI OS=Thalassiosira pseudonana GN=psaL PE=3 SV=1	-	-	-	-	-	-	K02699|1|4e-56|176|ccp:CHC_925|	GO:0015979//photosynthesis		GO:0009538//photosystem I reaction center;GO:0016021//integral component of membrane;GO:0009535//chloroplast thylakoid membrane
177	EED92706.1	dehydrogenase [Thalassiosira pseudonana CCMP1335]	64788.5	0.015	1	1	0.66	0.125	0.0209	EED92706.1	MAPNITSIPPTPPDRKNPQHGVKGVYYGGHWVDLEDCAGTFNPDSSKCSGCPSQSVCPRSQSRNAAGAPKDKVYDVVIIGAGCIGSAIARELSRYKLKTLMLESADDVSQGATKGNSGIVHAGYDDTPGSLHAKFCWPGNQMFPQLDKELRFGYQLNGSLVLATNKEELKILDELMDRGAKNGVKNLRIVQKEELFEMEPALNPNAIAALHAPDAGNVIPYEYAIALAENAVDNGVELRIRREVTDITKREDGSFELDVLNGITVGRESVMTRYVINCAGSSSDKIAKMIGDDSFYIKPRLGDYLLLNRNQGHLTKHTIFPCPDPVLGKGVLVQTTLWGNLILGPTARDVNNPEARDMSDATVQEYILSKCKQLCPYFDPKEVFHAFCGARSKSSRGDW…	100	0	gi|223998993|ref|XP_002289169.1|	dehydrogenase [Thalassiosira pseudonana CCMP1335]	31.52	2e-42	sp|P75063|Y051_MYCPN	Uncharacterized protein MG039 homolog OS=Mycoplasma pneumoniae (strain ATCC 29342 / M129) GN=MPN_051 PE=1 SV=1	383	7e-126	COG0579	L-2-hydroxyglutarate oxidase LhgO	G	Carbohydrate transport and metabolism	K00109|1|3e-30|127|gsl:Gasu_39930| 2-hydroxyglutarate dehydrogenase [EC:1.1.99.2]	GO:0055114//oxidation-reduction process	GO:0016491//oxidoreductase activity	-
178	EED86175.1	predicted protein [Thalassiosira pseudonana CCMP1335]	34233.8	0.271	1	1	0.51	0.141	0.01549	EED86175.1	MATNKFFKSLLFTLTIAISSFGFCVENSSAYPVFAQQGYSNPRAANGKLACANCHLNQKAIEIEAPQGVLPNSVFEIEIKVPYDVNRQQISADGKPADLNVGGILILPKGFKLASKTQISPEVKAKNKGVFISPYSTEFDNILVVGPIAGKTHQELIFPVVAPDPENNPDVKYLTYPFYAGGNRGRGQVYPTGERSNINSFGATQGGQITEITTTEKGESKITIVNSDGATTSQTLSAGLKLLVKQGDIVKQDQPLNIDPNVGGFGQEESEIVLQSSSRILGYLAFCFCLLLTQVLLVLKKKQYEKVQAAELNF	100	0	gi|118411137|ref|YP_874531.1|	cytochrome f [Thalassiosira pseudonana]	100	0	sp|A0T0R9|CYF_THAPS	Cytochrome f OS=Thalassiosira pseudonana GN=petA PE=3 SV=1	297	2e-98	COG3258	Cytochrome c	C	Energy production and conversion	K02634|1|9e-92|279|ccp:CHC_735| apocytochrome f	GO:0015979//photosynthesis;GO:0022900//electron transport chain	GO:0009055//electron carrier activity;GO:0005506//iron ion binding;GO:0020037//heme binding	GO:0031361//integral component of thylakoid membrane;GO:0009535//chloroplast thylakoid membrane
179	XP_002294484.1	predicted protein, partial [Thalassiosira pseudonana CCMP1335]	10362.3	0.133	1	4	0.78	0.025	0.0005944	XP_002294484.1	TMEEPLDLIKLSIDERVYVKCRNDRELRGKLHAFDQHLNMVLSDVEETITSTEEDDETGEEIVNKRTRSVGMLFVRGDIVVLVSPPLRTS	100	7e-41	gi|224011054|ref|XP_002294484.1|	predicted protein [Thalassiosira pseudonana CCMP1335]	71.11	7e-29	sp|Q1ZXK3|LSM3_DICDI	Probable U6 snRNA-associated Sm-like protein LSm3 OS=Dictyostelium discoideum GN=lsm3 PE=3 SV=1	60.8	3e-12	COG1958	Small nuclear ribonucleoprotein (snRNP) homolog	K	Transcription	K12622|1|3e-28|101|ath:AT1G76860| U6 snRNA-associated Sm-like protein LSm3			GO:0044424//intracellular part
180	EJK59471.1	hypothetical protein THAOC_20301 [Thalassiosira oceanica]	517129	0.005	1	1	0.67	0.125	0.01989	EJK59471.1	MSNQRAIYTAKHAFNGQRAQNQLSFPIGARIVAAPNQLGAWWWGNCNGADGWFPPAYVALSQQAPQANVMAVQQPQQPQQRQTQQFGSSISPRHQTQSRGVAPQHAQGFGVQAVNQSVNVALQQSTQPGGMGSMSSPPVKSGFHAGTEDPFAELQSSPLPTPTAAAPGATGITGMAPGQMNNAAPLVDPLSSSMPIGTTPTNLAKPSMASNTPVNPALANIFADASGGNRGRAGTGSSAGSGGLPTPAATPSTVAHQTAAARDQSATPGVPVQLSAGTASSRPIQPASDTLRTSSGVDAPTGKTGPSASAVTGAPRLSVDTSSPKESISSPVNNVASSRSAESSTMSTASGKITTPSSSATVSTPRPVSTPRKTSQTPVRQSVHKGLGNSGARLPDSIT…	100	0	gi|397606868|gb|EJK59471.1|	hypothetical protein THAOC_20301 [Thalassiosira oceanica]	-	-	-	-	77	2e-11	COG1196	Chromosome segregation ATPase	D	Cell cycle control, cell division, chromosome partitioning	K13448|1|2e-07|57.8|vra:106759275| calcium-binding protein CML		GO:0005509//calcium ion binding	-
181	EED93360.1	obtusifoliol 14-alpha demethylase, partial [Thalassiosira pseudonana CCMP1335]	50680.6	0.029	1	1	0.51	0.152	0.01847	EED93360.1	LPVVGTIVEFGKSPVKMVQRCYEDYGPVFTVPFFHKRLTFLIGPEAQEPFFKAPDEVLSQNEVYGFMKPVFGPGIVYDASKKNRQVQFQSMANGLRTARLKGYTAKIERETRQYLESWGESGELDLFHALSELTILTASRCLHGDDVRENLFKEVSELYHDLDQGLTPLTVFFPNAPTKSHMKRNAARAKMVELFSKVIKNRRDNPDVQHSDGTDILSIFMDVKYKDGSNITDEQVTGLLIALLFAGQHTSCITSTWTSLFILNNPAILKRIIAEQNDVFGSQPDADVDYKMVNEDMPLLHNSMKEALRLCPPLILLIRYALKDVKVKAAGKDYTIPKGDMVLISPSVGMRIPEVFKEPNTFDPDRFGPDREEDKSSPFAYMGFGGGMHSCMGQNFAFV…	100	0	gi|224000301|ref|XP_002289823.1|	obtusifoliol 14-alpha demethylase [Thalassiosira pseudonana CCMP1335]	48.21	1e-137	sp|Q9SAA9|CP511_ARATH	Sterol 14-demethylase OS=Arabidopsis thaliana GN=CYP51G1 PE=1 SV=1	349	5e-114	COG2124	Cytochrome P450	QV	Secondary metabolites biosynthesis, transport and catabolism;Defense mechanisms	K05917|1|2e-144|425|gsl:Gasu_06490| sterol 14-demethylase [EC:1.14.13.70]	GO:0009086//methionine biosynthetic process;GO:0055114//oxidation-reduction process;GO:0032259//methylation;GO:0000394//RNA splicing, via endonucleolytic cleavage and ligation;GO:0019745//pentacyclic triterpenoid biosynthetic process;GO:0016126//sterol biosynthetic process	GO:0008398//sterol 14-demethylase activity;GO:0070330//aromatase activity;GO:0009055//electron carrier activity;GO:0020037//heme binding;GO:0008168//methyltransferase activity;GO:0005506//iron ion binding	GO:0005794//Golgi apparatus;GO:0005783//endoplasmic reticulum;GO:0005886//plasma membrane
182	AAB70098.1	fucoxanthin-chlorophyll a/c light-harvesting protein, partial [Skeletonema costatum]	20722.5	0.111	2	8	0.47	0.222	0.04473	AAB70098.1	MKSVIFAAAIASAAAFAPAQVGKTTTSLNAFESELGAQAPLGFWDPLGFLDRADQETFDRLRYVELKHGRVSQLAFVGNLITRAGYHLPGNITPDSTFDSYPNGLAAINGADAIPTLRLIQTLAFIGFLELKVITDVTGDSQFAGDFRNGFDFGWDKQSPEWQEQKRAVELNQGRAAMMGILELMVHEQL	100	1e-124	gi|1778719|gb|AAB70098.1|	fucoxanthin-chlorophyll a/c light-harvesting protein, partial [Skeletonema costatum]	64.94	2e-73	sp|Q42395|FCP_ODOSI	Fucoxanthin-chlorophyll a-c binding protein, chloroplastic OS=Odontella sinensis GN=FCPA PE=2 SV=1	-	-	-	-	-	-	K08907|1|4e-11|63.2|gsl:Gasu_15240|	GO:0044237//cellular metabolic process		GO:0043234//protein complex;GO:0034357//photosynthetic membrane;GO:0009507//chloroplast;GO:0044425//membrane part
183	EED91184.1	RS24, ribosomal protein 24 40S small ribosomal subunit [Thalassiosira pseudonana CCMP1335]	15339.3	0.168	2	11	0.66	0.038	0.0007573	EED91184.1	MSDQSVVVKTRKFMKNPLLARRQMIVDIIHPGRANVAKSELQEVVGGMHKTDSKLVVLFGFRTKFGGGKSTGFCVIYDNEDALRKFEPKHRLVRLGLEDKKDRSRKAMKEAKNKGKKTRGTGASVAKHKAKRAANSD	100	3e-86	gi|224002811|ref|XP_002291077.1|	RS24, ribosomal protein 24 40S small ribosomal subunit [Thalassiosira pseudonana CCMP1335]	59.18	3e-40	sp|P14249|RS24_MUCCL	40S ribosomal protein S24 OS=Mucor circinelloides f. lusitanicus GN=RPS24 PE=3 SV=1	56.6	8e-10	COG2004	Ribosomal protein S24E	J	Translation, ribosomal structure and biogenesis	K02974|1|2e-43|142|olu:OSTLU_42986| small subunit ribosomal protein S24e	GO:0006412//translation	GO:0003735//structural constituent of ribosome;GO:0000166//nucleotide binding	GO:0005840//ribosome
184	AIR75596.1	photosystem II cytochrome b559 alpha subunit (chloroplast) [Cyclotella sp. WC03_2]	9489.82	0.321	2	9	0.5	0.154	0.01873	AIR75596.1	MSGGSTGERPFSDIITSVRYWIIHTITIPSLFVSGWLFISTGLAYDVFGTPRPNEYFTQDRQQVPLVNDRFSAKQELEDLTKGL	100	1e-56	gi|118411160|ref|YP_874554.1|	cytochrome b559 alpha chain [Thalassiosira pseudonana]	100	2e-57	sp|A0T0U2|PSBE_THAPS	Cytochrome b559 subunit alpha OS=Thalassiosira pseudonana GN=psbE PE=3 SV=1	-	-	-	-	-	-	K02707|1|4e-55|168|ccp:CHC_1170|	GO:0009767//photosynthetic electron transport chain	GO:0009055//electron carrier activity;GO:0005506//iron ion binding;GO:0020037//heme binding	GO:0009539//photosystem II reaction center;GO:0030096//plasma membrane-derived thylakoid photosystem II;GO:0016021//integral component of membrane;GO:0009535//chloroplast thylakoid membrane
185	EED94578.1	hypothetical protein THAPSDRAFT_268160 [Thalassiosira pseudonana CCMP1335]	31332.1	0.113	1	3	0.75	0.045	0.00228	EED94578.1	MCIPCCVCVSTSEVVVVERLGKFDRFINPGLGVIVCPFEKYAGKVSFRVQQLDVKVETKTKDNVFLTTVVSVQYQVIRENVYQAFYSLTNTQQQITAHVYDVMRSQLPTLELDAVFEAKEELALAVKNALSETMSSYGYQILQALITDIDPDIRVKQAMNEINSAKRLKFAVAEKAEGQKILQVKSAEAEAEAKYLSGVGVAKQRKAIVDGLRSSIVDFSDGVKGASSKDVMDLLLLSQYFDCIRDVGHANHCKTTFVPSGHSGGADAGMRNALLVANAAKLS	100	0	gi|223994903|ref|XP_002287135.1|	hypothetical protein THAPSDRAFT_268160 [Thalassiosira pseudonana CCMP1335]	51.7	1e-95	sp|Q9SRH6|HIR3_ARATH	Hypersensitive-induced response protein 3 OS=Arabidopsis thaliana GN=HIR3 PE=1 SV=1	281	7e-93	COG0330	Regulator of protease activity HflC, stomatin/prohibitin superfamily	O	Posttranslational modification, protein turnover, chaperones	-	GO:0010363//regulation of plant-type hypersensitive response;GO:0015706//nitrate transport;GO:0006612//protein targeting to membrane;GO:0043069//negative regulation of programmed cell death;GO:0030968//endoplasmic reticulum unfolded protein response;GO:0010167//response to nitrate;GO:0030003//cellular cation homeostasis;GO:0070838//divalent metal ion transport;GO:0050832//defense response to fung…		GO:0005739//mitochondrion;GO:0009506//plasmodesma;GO:0005774//vacuolar membrane;GO:0005886//plasma membrane
186	XP_002288047.1	predicted protein [Thalassiosira pseudonana CCMP1335]	125124	0.023	2	3	0.79	0.115	0.04291	XP_002288047.1	MMGGKMMRGKMFRPSGSDDDDEEGGDKHLFDSSDSDDSSDDDDSAAGKDETDKPAAAANKEEDGAKKSANLSSDDDSDDDGNNEDKKPSASGGDNKRTREDSSDDDSSDDDDDEPSPEKAKSKKSQKKRPKINFFDEEAEASDDDSDDEDGSDKDPDDVVRKHYTEEEIRKEYRDEEAEAIIAQQDRRRQRAGGWLGGSWKRGIGWIGGLWIGGGWIPWGGGMRGGVLVRVVARKGAGDRDDEDMIGRREDDDEEMGVGQSYTAVSQQSLMPSVSDPNLWMFSCPTGKEQELVYQIMNKAVAFAKRGRPLGITSVVAAQTKGKVYVESYSEPAVMEALQGVRGLMIYSAVKVPISDMTTVMTVVPKKVPVKKNDWVRMTRGHFKGDLALVKHVRDSGLK…	100	0	gi|223996747|ref|XP_002288047.1|	predicted protein [Thalassiosira pseudonana CCMP1335]	32.37	5e-76	sp|Q5ZI08|SPT5H_CHICK	Transcription elongation factor SPT5 OS=Gallus gallus GN=SUPT5H PE=2 SV=1	-	-	-	-	-	-	K15172|1|3e-77|280|brp:103858471| transcription elongation factor SPT5	GO:0006412//translation		GO:0005622//intracellular
187	EED96417.1	hypothetical protein THAPSDRAFT_260925, partial [Thalassiosira pseudonana CCMP1335]	20296.9	0.093	1	2	0.76	0.03	0.0008156	EED96417.1	MVTLPTWAIASSEDYFSQKYTTDEEMMSLAVHLSDRNITEGTGGPFGAAIFERHPDKGYCTLTSIGMNRVVPLGNSTLHGETVAIQLAQRKVGSFTLMLDGKRRFELFTSCEPCCMCLGATLWSGVSRIVCGATKDDAQAIGFDEGPVFEESYKHLEKAGVEVTRNVLREEAAKVLTRYGTSG	100	4e-136	gi|223994185|ref|XP_002286776.1|	hypothetical protein THAPSDRAFT_260925 [Thalassiosira pseudonana CCMP1335]	31.97	6e-16	sp|O34598|GUAD_BACSU	Guanine deaminase OS=Bacillus subtilis (strain 168) GN=guaD PE=1 SV=1	182	4e-57	COG0590	tRNA(Arg) A34 adenosine deaminase TadA	J	Translation, ribosomal structure and biogenesis	K12951|1|2e-12|68.6|smo:SELMODRAFT_448085| cation-transporting P-type ATPase D [EC:3.6.3.-]!K15441|2|1e-07|53.1|gsl:Gasu_23950| tRNA-specific adenosine deaminase 2 [EC:3.5.4.-]	GO:0008152//metabolic process	GO:0016787//hydrolase activity;GO:0008270//zinc ion binding	GO:0044444//cytoplasmic part
188	EJK75104.1	hypothetical protein THAOC_03185 [Thalassiosira oceanica]	19878.4	0.07	1	1	0.6	0.13	0.01752	EJK75104.1	MSTFAYRRSFPAKKDRQNQLAHEETLRKIEKLKTDLQEAEAKLADAKRGREDDEEGTRARKMQRRAELKKEIETANAELSKLKQNDPQAIADLEKELKLVKEAADRWTDNIFSCKDYLVKKRGMMKKEANKYLGITDNFDCKLGGVGFGFGAKRLTSTLRLDPDDKALKNLR	100	6e-122	gi|397642229|gb|EJK75104.1|	hypothetical protein THAOC_03185 [Thalassiosira oceanica]	32.65	2e-14	sp|Q8K396|MND1_MOUSE	Meiotic nuclear division protein 1 homolog OS=Mus musculus GN=Mnd1 PE=1 SV=1	-	-	-	-	-	-	-	-	-	-
189	YP_004072531.1	50S ribosomal protein L11 (chloroplast) [Thalassiosira oceanica CCMP1005]	14848.1	0.106	1	6	0.73	0.022	0.0002473	YP_004072531.1	MPKKITALIKLALPAGKATPAPPVGPALGQHGVNIAAFCKEYNAKTTEKAGLIIPVEISVYEDRSYTFLLKTPPASVLLANAAKVKKGSSTPNRVNVGSVTQAQLEEIANIKLPDLNTTKISSAVRIVEGTARNMGITIVD	100	2e-97	gi|315320475|ref|YP_004072531.1|	50S ribosomal protein L11 [Thalassiosira oceanica CCMP1005]	93.62	2e-93	sp|A0T0Q5|RK11_THAPS	50S ribosomal protein L11, chloroplastic OS=Thalassiosira pseudonana GN=rpl11 PE=3 SV=1	223	8e-75	COG0080	Ribosomal protein L11	J	Translation, ribosomal structure and biogenesis	K02867|1|2e-63|195|ppp:PHYPADRAFT_143578| large subunit ribosomal protein L11	GO:0006412//translation	GO:0003735//structural constituent of ribosome;GO:0019843//rRNA binding	GO:0005840//ribosome;GO:0009507//chloroplast
190	BAA75795.1	ribulose-1,5-bisphosphate carboxylase/oxygenase small subunit (chloroplast) [Thalassiosira nordenskioeldii]	16039.7	0.36	1	5	0.82	0.096	0.04246	BAA75795.1	MRLTQGCFSFLPDLTDTQIEKQVAYAMNKGWAMNVEWTDDPHPRNNYWELWGLPLFDIKDPATVMFELNEARKSCASGYIRINAFDASYGVESCVMSFITNRPATEPGFYLDRTEGPGRQVIYSIKSYSVQANPEGSRY	100	4e-103	gi|14285703|sp|O98948.1|RBS_THANO	RecName: Full=Ribulose bisphosphate carboxylase small chain; Short=RuBisCO small subunit (chloroplast) [Thalassiosira nordenskioeldii]	100	6e-104	sp|O98948|RBS_THANO	Ribulose bisphosphate carboxylase small chain OS=Thalassiosira nordenskioeldii GN=rbcS PE=3 SV=1	198	4e-65	COG4451	Ribulose bisphosphate carboxylase small subunit	G	Carbohydrate transport and metabolism	K01602|1|4e-63|192|ccp:CHC_955| ribulose-bisphosphate carboxylase small chain [EC:4.1.1.39]	GO:0019253//reductive pentose-phosphate cycle;GO:0009853//photorespiration;GO:0055114//oxidation-reduction process	GO:0016984//ribulose-bisphosphate carboxylase activity;GO:0004497//monooxygenase activity	GO:0009507//chloroplast
191	AIR75899.1	chaperonin GroEL (chloroplast) [Roundia cardiophora]	57332.7	0.169	1	1	0.71	0.069	0.005875	AIR75899.1	MTKKILYQDNARRALERGMEIMVEAVSVTLGPKGRNVVLEKTYGSPQIINDGVTIAKEINLEDHIENTGVSLIRQAAAKTNDVAGDGTTTATVLAYAMVKEGLKNVAAGANPISIKLGMEKATQYLVMQINEFAQPVEDIQSIKQVAAISAGNDEVIGALIADALAKVGKEGVISLEEGKGIITELEITEGMKLEKGFISPYFITDTEKMEVSYENPYILLTDKRITLVQQDLLPILEQITKTKRPLLIIAEDVEKEALATLILNKLRGIVNVVAVRAPGFGELRKLMLQDIAVLTGGTVITQDAGLSLENIQLNLLGQARRIIVSKDTTTIVGDGLEIENINARCEQLRKQVNIADTGYEKEKLQDRIAKLSGGIAVIRVGAVTETEMKDKKLRLEDA…	100	0	gi|700658221|ref|YP_009093226.1|	chaperonin GroEL (chloroplast) [Roundia cardiophora]	95.45	0	sp|A0T0X0|CH60_THAPS	60 kDa chaperonin, chloroplastic OS=Thalassiosira pseudonana GN=groL PE=3 SV=1	772	0	COG0459	Chaperonin GroEL (HSP60 family)	O	Posttranslational modification, protein turnover, chaperones	K04077|1|0.0|540|cam:101512130| chaperonin GroEL	GO:0042026//protein refolding	GO:0005524//ATP binding;GO:0051082//unfolded protein binding	GO:0009507//chloroplast
192	EED95927.1	predicted protein [Thalassiosira pseudonana CCMP1335]	48394	0.024	1	3	0.72	0.05	0.002518	EED95927.1	MRAFPLAISLICASVSSISAFSSARSVQPIQTSTNNVVTNSPYTRTTTSKTTTTTLYMSSRSPSRDFYSMLGVSRSADKAEIKSAYRKLAKQLHPDANPNKDTTQEFQDINRAYEVLSDEDKRKKYDMFGEAGVGSSAASEGGGPYGYGSPFGGGGFSQEVDLGDIFDTFFGGGGGPGGPGAGFAGGRGARGGRRSGPMAGDDLRFDLELDFKKAVFGGEEKVRIRHLETCGTCTGSGVKPGAKVNTCSTCNGVGVTMQVTRTPLGNFQTQQTCASCRGTGQKIEEYCGTCSGDGTVSKTKQIKVDIPPGVEDGNKLRVRSEGDAGPNGGPAGDLYIFLKVKADPNFRREGPEIYSDATISYVDAILGASKKVPVVDGEVTIKVPPGTQPEQVMRLKGN…	100	0	gi|223993205|ref|XP_002286286.1|	predicted protein [Thalassiosira pseudonana CCMP1335]	48.33	2e-94	sp|B8HLD2|DNAJ_CYAP4	Chaperone protein DnaJ OS=Cyanothece sp. (strain PCC 7425 / ATCC 29141) GN=dnaJ PE=3 SV=1	374	6e-126	COG0484	DnaJ-class molecular chaperone with C-terminal Zn finger domain	O	Posttranslational modification, protein turnover, chaperones	K03686|1|5e-102|315|gsl:Gasu_25590| molecular chaperone DnaJ		GO:0005488//binding	-
193	XP_002293462.1	receptor mediated endocytosis protein-like protein [Thalassiosira pseudonana CCMP1335]	62773.5	0.051	1	1	0.69	0.167	0.04886	XP_002293462.1	MPPSTDDAASKTSRVSAQLKSIYKDNILPAEKRYRYDFFYESPFLTDVEFDAKPQVMLVGQYSVGKTSFIRYMLGRDFPGARIGPEPTTDRFTCLINGPEERTIPGNALSVHPDLPFRGLERFGVSFLSRFEGSQLPSSVLRSVTLVDTPGILSGEKQRVNRGYDFTKVVAWFAERADLILLLFDAHKLDISDELKSTIDVLKGHEDKIRCILNKADQINRQQLMRVYGALLWSLGKTINSPEVLRVYVGSFWSEPLQNLDNAELFEQEESDLMRDLAILPRQSAVRKINELVKRIRKVKTLAYIIGYLKAQMPTVMGKEKKQSKLITDMPNVFRTIMKKHNLAPGDFPDINKFSEKLKDTKFSEFASLKVEQIQLLEDCLTGHLPRLMEELPSERDTP…	100	0	gi|224009007|ref|XP_002293462.1|	receptor mediated endocytosis protein-like protein [Thalassiosira pseudonana CCMP1335]	48.13	9e-175	sp|Q5E9R3|EHD1_BOVIN	EH domain-containing protein 1 OS=Bos taurus GN=EHD1 PE=1 SV=1	118	1e-26	COG0699	Replication fork clamp-binding protein CrfC (dynamin-like GTPase family)	L	Replication, recombination and repair	K12483|1|4e-146|434|sind:105176661| EH domain-containing protein 1		GO:0005509//calcium ion binding;GO:0005525//GTP binding	-
194	EJK64946.1	hypothetical protein THAOC_14264, partial [Thalassiosira oceanica]	12399.3	0.075	1	1	0.64	0.142	0.02557	EJK64946.1	AAAAPPQGPPEAPTYLAATYNAGQGALTLNYKRAVTPGRVTVGAMLECSPVTLESQAAVGAEFSLTRSKMNVCVDSSGRIQSVLESKLGREPGGPALSFAAELDHGKNVMKFGYGLNIGS	100	1e-73	gi|397618556|gb|EJK64946.1|	hypothetical protein THAOC_14264, partial [Thalassiosira oceanica]	29.59	4e-07	sp|Q9LHE5|TO401_ARATH	Mitochondrial import receptor subunit TOM40-1 OS=Arabidopsis thaliana GN=TOM40-1 PE=1 SV=3	-	-	-	-	-	-	K11518|1|4e-08|53.5|gsl:Gasu_23460| mitochondrial import receptor subunit TOM40	GO:0055085//transmembrane transport;GO:0044070//regulation of anion transport	GO:0008308//voltage-gated anion channel activity	GO:0005741//mitochondrial outer membrane
195	XP_002297537.1	photosystem I assembly protein ycf3, hypothetical, plastid-encoded [Thalassiosira pseudonana CCMP1335]	21310.6	0.098	2	7	0.78	0.121	0.04828	XP_002297537.1	MGVRNFIDRVFTVISDLILKLLPASKQEKQAFAYYKAGMAAQAEGDYAEALENYYESLYLDEDQYDRSYTLYNIGLIYAKNENYPRALEYYHQAVSLNSNLPQALNNIAAIYHRQGLLALEMASQDYDAEMEISEEYEYIELAKGLFDKAAEYWYQALKLAPDNYPRARNWLRITGRAKSLDSF	100	4e-120	gi|118411133|ref|YP_874527.1|	photosystem I assembly protein ycf3 [Thalassiosira pseudonana]	100	6e-121	sp|A0T0R5|YCF3_THAPS	Photosystem I assembly protein Ycf3 OS=Thalassiosira pseudonana GN=ycf3 PE=3 SV=1	203	7e-66	COG0457	Tetratricopeptide (TPR) repeat	R	General function prediction only	-	GO:0015979//photosynthesis		GO:0009535//chloroplast thylakoid membrane
196	YP_009093479.1	photosystem I subunit III (chloroplast) [Thalassiosira weissflogii]	20532.8	0.265	3	15	0.61	0.036	0.0004692	YP_009093479.1	MKRVNLLSLLFAVLIALVPNQAFAEIGGLTKCSESPAFTKRLNASVKKLEQRASQYEADSPPALALKQQIERTQARFDKYSRSELLCGTDGLPHLVADGRWSHAAEFILPGFGFIYISGWIGWVGRKYLRAVSTSANPSESEIIINVPLALKIMTTGYIWPISAWQELISNDLVAVSEEITVSPR	100	5e-124	gi|700082681|ref|YP_009093479.1|	photosystem I subunit III (chloroplast) [Thalassiosira weissflogii]	86.49	2e-112	sp|P49483|PSAF_ODOSI	Photosystem I reaction center subunit III OS=Odontella sinensis GN=psaF PE=3 SV=1	-	-	-	-	-	-	K02694|1|1e-75|228|ccp:CHC_25|	GO:0015979//photosynthesis		GO:0009538//photosystem I reaction center;GO:0016021//integral component of membrane;GO:0009535//chloroplast thylakoid membrane
197	EED94363.1	ABC transporter [Thalassiosira pseudonana CCMP1335]	74032.9	0.054	3	3	0.77	0.111	0.03333	EED94363.1	MAIISKLASKAAIVSLVASSSFYNDNVSTAFAPSVASIANRPSLYPPLIPSVRTTMSTSQLHAKKKKGNTPRPNPNYGKQQKQEKASVKEAKFDAATRQFQFTLVGLTKTLPDKSKDILKNINLSFYPGAKIGVVGLNGSGKSTLLKIMAGVEKEFDGTARPLPGSSIGYLPQEPRLEYETVKECIDSAVASSRAILDTYNELSLSMADPNLTDEEMTSAMNQLEAIGDKIEAENLWELDRMVERSLTLHWFGIYYFRAMDSLRVPPGDAKTAVLSGGEKRRVSLCQLLLESHDMLLLDEPTNHLDAESIAWLEQFLDQFKGTVVCITHDRYFLENVAQWILELDRGQGIPFEGNYSQWLEAKNNRLEGEKKSQTAAAKAVAAELEWVRSNPKAKGTKS…	100	0	gi|223998508|ref|XP_002288927.1|	ABC transporter [Thalassiosira pseudonana CCMP1335]	55.61	0	sp|P45127|ETTA_HAEIN	Energy-dependent translational throttle protein EttA OS=Haemophilus influenzae (strain ATCC 51907 / DSM 11121 / KW20 / Rd) GN=ettA PE=1 SV=1	654	0	COG0488	ATPase components of ABC transporters with duplicated ATPase domains	R	General function prediction only	K06185|1|3e-47|179|vcn:VOLCADRAFT_93958| ATP-binding cassette, subfamily F, member 2!K06158|5|2e-45|176|gsl:Gasu_15030| ATP-binding cassette, subfamily F, member 3	GO:0006200//ATP catabolic process	GO:0005524//ATP binding;GO:0016887//ATPase activity	-
198	EED94963.1	RL19, ribosomal protein 19 60S large ribosomal subunit [Thalassiosira pseudonana CCMP1335]	21300.1	0.092	1	1	0.77	0.113	0.03511	EED94963.1	MVSLKLQKRLAASVLKCGKRKIWLDPNEINEISLANSRRNIARLEKDGLIMKKPAVVHSRSRVNARLEAKRKGRHTGIGKRRGTANARLPFKVIWMRRIRVLRRLLHKMRDAKKIDKHIYHTLYLHAKGNQFKNKRVLLETIHTMKAEKAQTKALADQAEAKKSRARARVARRAAKEAKGKEDQ	100	2e-111	gi|223995693|ref|XP_002287520.1|	RL19, ribosomal protein 19 60S large ribosomal subunit [Thalassiosira pseudonana CCMP1335]	70.89	1e-76	sp|P36241|RL19_DROME	60S ribosomal protein L19 OS=Drosophila melanogaster GN=RpL19 PE=1 SV=2	134	1e-38	COG2147	Ribosomal protein L19E	J	Translation, ribosomal structure and biogenesis	K02885|1|3e-76|230|crb:CARUB_v10014622mg| large subunit ribosomal protein L19e	GO:0006412//translation	GO:0003735//structural constituent of ribosome	GO:0005840//ribosome;GO:0005739//mitochondrion
199	EJK49929.1	hypothetical protein THAOC_31144, partial [Thalassiosira oceanica]	40751.9	0.028	1	1	0.53	0.171	0.02558	EJK49929.1	ADALDKEMKLTRDLMELFIEYQVPSDLLSYNGHSESAALEDKIANVTANVKAVVDVIESQKEKQLKDDMTMAYMDDLIQRREQLIMSERVVRYERGNDGSSRRGSARKRKTAEYQSIPLQHPIPYQSCMMMDCGDDLDFEFGSWCADEEDLCFSRDEFADATSTNEGGSPAGHEGAADRTENKSPRNDVDGQGTTSGGRSDPGDSITQQEGVDFTLIPKQLDQLVERKVDAASLRSTTIKTSSNWTRNRQMNLLSKPERHSLDTDGIRREKSKAFDLLDALSRSGSLAIAHSELHVVVAMTHCFEKDLMGTVIRDNVNPIEKIECSTLLLASAVHGVSARELVCDANELRRLRMTTPRLLEG	100	0	gi|397575858|gb|EJK49929.1|	hypothetical protein THAOC_31144, partial [Thalassiosira oceanica]	-	-	-	-	-	-	-	-	-	-	-	-	-	-
200	ABK20727.1	ATP synthase CF0 B chain subunit I (chloroplast) [Thalassiosira pseudonana]	19998	0.229	4	12	0.48	0.161	0.01946	ABK20727.1	MENFNQIFTVLAASEGIGLNLDILETGLLNILALVAILVYTGKDFLGSILQERKSTIVKSVQDAEDRLNEANRRLSEAQKQLSQAHVVISEIRNETKTAKTNLLKSDATTAKKELTTRFNRAISSFRSKERVIFLDVKQQIISLVLKRSAIQAKETFGSKKRARALINETIQKLEGDLL	100	3e-113	gi|118411110|ref|YP_874504.1|	ATP synthase CF0 B chain subunit I [Thalassiosira pseudonana]	100	6e-114	sp|A0T0P2|ATPF_THAPS	ATP synthase subunit b, chloroplastic OS=Thalassiosira pseudonana GN=atpF PE=3 SV=1	88.2	1e-20	COG0711	FoF1-type ATP synthase, membrane subunit b or b'	C	Energy production and conversion	K02111|1|1e-11|65.9|gsl:Gasu_40630| F-type H+-transporting ATPase subunit alpha [EC:3.6.3.14]!K02109|2|6e-09|56.2|ppp:PhpapaCp054| F-type H+-transporting ATPase subunit b	GO:0042777//plasma membrane ATP synthesis coupled proton transport	GO:0046933//proton-transporting ATP synthase activity, rotational mechanism;GO:0005524//ATP binding	GO:0016021//integral component of membrane;GO:0045263//proton-transporting ATP synthase complex, coupling factor F(o);GO:0009535//chloroplast thylakoid membrane;GO:0005886//plasma membrane
201	EJK55038.1	hypothetical protein THAOC_25270 [Thalassiosira oceanica]	21290.7	0.163	1	8	0.81	0.082	0.02374	EJK55038.1	MKSVAALALIGSAAAFAPAQTGKASTQLNAFESELGAQPPLGFFDPLGLLDDADQERFDRLRYVEIKHGRISMLAFLGNIITRAGVHLGGSIDQAGDSFDSFPNGWAAINGPDAIPGAGLAQMVALVGALELGVMKDIEGTGNEFVGDFRNGSLDFGWDTFDEETKLSKRAIELNNGRAAMMGILGLMVHEQLGGELPIVGAM	100	5e-118	gi|397590459|gb|EJK55038.1|	hypothetical protein THAOC_25270 [Thalassiosira oceanica]	82.16	2e-93	sp|Q42395|FCP_ODOSI	Fucoxanthin-chlorophyll a-c binding protein, chloroplastic OS=Odontella sinensis GN=FCPA PE=2 SV=1	-	-	-	-	-	-	K08907|1|6e-09|57.8|gsl:Gasu_57520|	GO:0018298//protein-chromophore linkage;GO:0015979//photosynthesis	GO:0016168//chlorophyll binding	GO:0030076//light-harvesting complex;GO:0009523//photosystem II;GO:0016021//integral component of membrane;GO:0009535//chloroplast thylakoid membrane
202	XP_002295760.1	predicted protein [Thalassiosira pseudonana CCMP1335]	26883.4	0.028	1	1	0.73	0.121	0.03025	XP_002295760.1	MSFLRPLSTLFRAGTRPTVSASTSITTSGVINGSPSALLLPTHRSKHSATQVKRLFKKNPARLRIQRRNEQQLAATEGDASTTNTSRSSSSNNATTKIPQRSYPPVFKPTFLQNGWSAPPPADVEVPVYPFRVRRTGRKPFGSAGFLPVYRDVRIHGTKHTTIIRNVQGDISAFLTELRAVLALPLPKKGILTSMSNINVSSPKHGGGEAGRGVNAENPIRLRAGNTIEVNGDWSREVKRWLAGLGF	100	2e-164	gi|224004218|ref|XP_002295760.1|	predicted protein [Thalassiosira pseudonana CCMP1335]	-	-	-	-	-	-	-	-	-	-	-	GO:0006412//translation	GO:0003735//structural constituent of ribosome	GO:0005840//ribosome
203	XP_002292359.1	adenosuccinate synthase [Thalassiosira pseudonana CCMP1335]	46415.4	0.041	1	3	0.72	0.152	0.04642	XP_002292359.1	MLSQEYDVCARVAGGSNAGHTIVVEGKKYKFHLLPSGVLNEKATCVIGNGVVIHLPSFLNELEGLTASGINAEGRILLSDRAHLVFDFHQEADGYSEKKLGRNKIGTTKKGIGPAYASKISRNGIRIGDLKNFDFFEMRFRELAESMMRSYPGLEIDVEGQLDYYRSISERVCAMTTDTIEYTNEAYDMGKKILIEGANATMLDIDFGTYPYVTSSNPSIGSVLTGLGVSPKKIHGIYGTTKAYCTRVGEGPFPTELDRDVPGSIGEHLGVVGAEWGTTTGRSRRVGWLDIPQMKYSTLINGFTAINLTKLDVLTGLAEIKIGRAYKHNGKIINTMPSCLKTMSEIEVIYETLPGWSEDISKARNFEDLPVNAQRYVLRVQELLGVPIRWIGCGANRLD…	100	0	gi|224006798|ref|XP_002292359.1|	adenosuccinate synthase [Thalassiosira pseudonana CCMP1335]	72.99	0	sp|B7FUM7|PURA_PHATC	Adenylosuccinate synthetase OS=Phaeodactylum tricornutum (strain CCAP 1055/1) GN=PHATRDRAFT_26256 PE=3 SV=1	378	3e-127	COG0104	Adenylosuccinate synthase	F	Nucleotide transport and metabolism	K01939|1|6e-167|480|csl:COCSUDRAFT_47829| adenylosuccinate synthase [EC:6.3.4.4]	GO:0044208//'de novo' AMP biosynthetic process	GO:0004019//adenylosuccinate synthase activity;GO:0000287//magnesium ion binding;GO:0005525//GTP binding	GO:0009536//plastid
204	YP_004072645.1	30S ribosomal protein S9 (chloroplast) [Thalassiosira oceanica CCMP1005]	15199.5	0.067	1	2	0.29	0.146	0.01422	YP_004072645.1	MNTIFQKDKIGLGKRKRAVARVFLVPGDGKITINKTPGAKYLQYNTNYLNSIWAPLEKLNLKTQFDIVAIVKGGGLTGQTDAIKLGVARLICKMENENRLVLKPFGFLSRDARIKERKKYGLRKARKASQYSKR	100	1e-93	gi|315320588|ref|YP_004072645.1|	30S ribosomal protein S9 [Thalassiosira oceanica CCMP1005]	88.81	1e-83	sp|A0T0Z6|RR9_THAPS	30S ribosomal protein S9, chloroplastic OS=Thalassiosira pseudonana GN=rps9 PE=3 SV=1	155	2e-48	COG0103	Ribosomal protein S9	J	Translation, ribosomal structure and biogenesis	K02996|1|4e-36|126|ppp:PHYPADRAFT_136392| small subunit ribosomal protein S9	GO:0006412//translation	GO:0003735//structural constituent of ribosome	GO:0005840//ribosome;GO:0009507//chloroplast
205	EED91043.1	predicted protein [Thalassiosira pseudonana CCMP1335]	43937.8	0.02	1	2	0.49	0.119	0.009218	EED91043.1	MQTDDVDTSKLYETLEVEKTATQKEIRKAYMKLSRTHHPDKGGDEHKFKEISAAYEILSDENKRKQYDKYGLEGVRGDDVGAAGGEDLFSMFFGGGRSGRSAGPRKGPSVNHPLKVSLEDLYNGKTVKLAVNRKIIEGTPVECSECKGQGAVMEVRQLGPGMITQTQRPCDKCKGVGQKCDFKSERKVLEVHVEKGMMHNDKITFREMADEVPKMQTGDINFIIQEKDHDLFKRKGADLLAVKEVSLNQALCGVTWKIKHLDGRVLVIKSRPGEVIKPEQNTKDALPFVKVLPDEGMPSKGNPFVRGNMYVMFRVKFPEDNELPESVIEQLKQLLPEPDEPEEYDPMDEGVEEVHLNQGDLKSFGKGGAAMSSEAHDSDDEEGGPVQCQQS	100	0	gi|224002529|ref|XP_002290936.1|	predicted protein [Thalassiosira pseudonana CCMP1335]	42.58	3e-85	sp|P42825|DNAJ2_ARATH	Chaperone protein dnaJ 2 OS=Arabidopsis thaliana GN=ATJ2 PE=1 SV=2	142	8e-37	COG0484	DnaJ-class molecular chaperone with C-terminal Zn finger domain	O	Posttranslational modification, protein turnover, chaperones	K09503|1|4e-95|293|spen:107004927| DnaJ homolog subfamily A member 2	GO:0006457//protein folding	GO:0046872//metal ion binding;GO:0031072//heat shock protein binding;GO:0051082//unfolded protein binding	-
206	AIR75573.1	cytochrome f (chloroplast) [Cyclotella sp. WC03_2]	34260.9	0.277	1	5	0.56	0.089	0.005278	AIR75573.1	MATNKFFKSLLFTLTIAISSFGFCVENSFAYPVFAQQGYSNPRAANGKLACANCHLNQKAIEIEAPQGVLPNSVFEIEIKVPYDTTRQQISADGKPADLNVGGILILPKGFKLASKNQISAEVKAKNKGVFISPYSTEFDNILVVGPIAGKTHQELIFPVVAPDPESNPDVKYLTYPFYAGGNRGRGQVYPTGEKSNINSFGAIQAGQITEILTTEKGESKITIVNSDGTATSQTLSAGLKLLVKQGDIVKQDQPLNIDPNVGGFGQEDSEIVLQSSSRILGYLIFCLCLLLTQVLLILKKKQYEKVQAAELNF	100	0	gi|691190060|gb|AIR75573.1|	cytochrome f (chloroplast) [Cyclotella sp. WC03_2]	94.9	0	sp|A0T0R9|CYF_THAPS	Cytochrome f OS=Thalassiosira pseudonana GN=petA PE=3 SV=1	291	4e-96	COG3258	Cytochrome c	C	Energy production and conversion	K02634|1|2e-102|306|ccp:CHC_735| apocytochrome f	GO:0015979//photosynthesis;GO:0022900//electron transport chain	GO:0009055//electron carrier activity;GO:0005506//iron ion binding;GO:0020037//heme binding	GO:0031361//integral component of thylakoid membrane;GO:0009535//chloroplast thylakoid membrane
207	ACI64593.1	predicted protein [Thalassiosira pseudonana CCMP1335]	62878.8	0.024	1	2	0.58	0.101	0.007734	ACI64593.1	MTLSLRISILIASLKIANGFTSPHFSLTSDLQITKPSHHHASLHPSVSTPSSTLSTLHMAYSPPEDAEKVKATKPKLPSPKVGDVVRYYDVDGGTTDGQTLVGKISLIQPIRPPTNNPEGTNKWLIEITEMEDVGDGYYAEYPSRKRRRSALRKLEEIAPLPASFVRTEDAYKIPMERGTNRPMPSHSGYDLIGYEGPAAVPINQDVVAADGENYDKIKYSLIRNAAIAGTVGTIFADLFKGTEDAAIYFAGALAGVAYLFFLGIKTDTVGSAEAKLGSNVSNLRFIFPVFVLVAVALKNVSSGDANPVDVPGIFSTVTPEQFGAAMIGFLTYRLPLFVSQLAPVISKSATDMLPGSAGMALQMANDAKKRGVDVAALERELLPGDDLVTVLLVSGPEA…	100	0	gi|224004450|ref|XP_002295876.1|	predicted protein [Thalassiosira pseudonana CCMP1335]	-	-	-	-	-	-	-	-	-	-	K00942|1|3e-17|89.0|ccp:CHC_T00007666001| guanylate kinase [EC:2.7.4.8]	-	-	-
208	XP_002291118.1	HSP90 family member [Thalassiosira pseudonana CCMP1335]	80628.8	0.136	1	4	0.73	0.117	0.02748	XP_002291118.1	MTDSQESYAFSADINQLLSLIINTFYSNKEIFLRELISNSSDALDKIRYQSLTDSSVLDAEPELQIKLIPDKANNTLSIEDTGIGMTKADLVNNLGTIAKSGTKAFMEALTAGADISMIGQFGVGFYSAYLVADKVEVISKNNDDECYTWASEAGGSFTITKTPEDACLKRGTRIILHLKEDMSEYLEERRIKDLVKTHSEFIGFPIMLYTEKTTEKEVTDDDDDDEDEGDDDKPKVEEVDEEEAKKEKKTKKIKEVTHEWEHLNNMKPLWMRKPEDVTQDEYAAFYKSISNDWEEHAAVKHFSVEGQLEFKAVLFCPKRAPFDMFEGGAKKKHNHIKLYVRRVFIMDNCEDLMPEWLSFIKGVVDSEDLPLNISRETLQQNKILRVIKKNLVKKCIEM…	100	0	gi|224002893|ref|XP_002291118.1|	HSP90 family member [Thalassiosira pseudonana CCMP1335]	72.65	0	sp|P36181|HSP80_SOLLC	Heat shock cognate protein 80 OS=Solanum lycopersicum GN=HSC80 PE=2 SV=1	563	0	COG0326	Molecular chaperone, HSP90 family	O	Posttranslational modification, protein turnover, chaperones	K04079|1|0.0|932|brp:103851857| molecular chaperone HtpG	GO:0006457//protein folding;GO:0006950//response to stress	GO:0051082//unfolded protein binding;GO:0005524//ATP binding	GO:0005737//cytoplasm
209	EJK45542.1	sterol regulatory element-binding protein, partial [Thalassiosira oceanica]	112710	0.008	1	1	0.47	0.151	0.01615	EJK45542.1	NEYDVSDERSIQYDSLRLAKDDVSAIRASTNKGAETVLKQSELSDIAYWVFEGEDDVGLFGSAANIQGMKDAYDVFYEDKAFVDWCVLDYREEVAVNETRGCVPPLTPLTMYYASEWDSEMVATAIEELKKTEKLQLFNDLSVCVVSGLYCGSQAIEDASAEDRMWVMELGNNITAITSKWDMKGPLVSNFTQVTELASLLIQVDLFKGTVDFGFDNDFSAENPVSQYSRGIVFWGGPLDERNTTGQEDDEEADELEESDGKLRKEFIKSEYLAGMEKQSEEDAHSGVNTYYFMTAIIGDVILGIVTQDALLALFSLAFVFFWLRINTRSWFLAYIGLLEIFFSIPIAWFIFTVVFQIEYFATLNSLALFVVAAIGADDIFIFMDAYKQSQYHVEILDD…	100	0	gi|397567357|gb|EJK45542.1|	sterol regulatory element-binding protein, partial [Thalassiosira oceanica]	22.84	3e-32	sp|Q9VNJ5|DISP_DROME	Protein dispatched OS=Drosophila melanogaster GN=disp PE=1 SV=1	56.2	4e-06	COG1033	Predicted exporter protein, RND superfamily	R	General function prediction only	K12385|1|5e-11|67.0|thj:104812975| Niemann-Pick C1 protein			GO:0016020//membrane
210	EJK43800.1	hypothetical protein THAOC_37719 [Thalassiosira oceanica]	83037.4	0.028	1	1	0.72	0.069	0.005997	EJK43800.1	MMLAVEAAVAVAMATALFAAELASAFRFQEGVVSSSRPRTSCQSCRGKNRRHAIDIEGKRRRVILRNQMPPFFASPAFGQPQQSGPASASPQSATVTLRLPLGTLFDGRDYIFVTESNVRGYEWTERETDILLDDLMDAALGNLGGQLDNDDEPSLLAKPASMITDYELSQIVLVPGNWDSNLLGLGACYDVYDGQQRLVTLNLLLAALRDSFKCEADELCELYPNEMAGGKRAVALLATSNEIGTMLVPTKVRKEDVLRISLRKRDNILLENILRGVIESETPTQAYTTMSSRERSVLLSALSSANARILDNFTHSARRLSILSTRERLRLLDYIVERVHLLVCIPETSRIARNIVMSQNRKGLDNEPVDDFKGVVCFRYTLDEDEMYKTFDEWDVLS…	100	0	gi|397563444|gb|EJK43800.1|	hypothetical protein THAOC_37719 [Thalassiosira oceanica]	-	-	-	-	-	-	-	-	-	-	-	-	-	-
211	EED89674.1	RL35, ribosomal protein 35 60S large ribosomal subunit [Thalassiosira pseudonana CCMP1335]	13782.9	0.083	1	2	0.76	0.116	0.03468	EED89674.1	MVKAYELRGLPKEELVKTLNELRKELSELHVAKVTGGAASKIAKIKSVRKSIARVLTVHNQQQKEGIRKASAGSKYISKDLRMKKTRAIRRALTKEQKGKKTLKQQKKDTHFPMRRYAVKA	100	2e-66	gi|224008508|ref|XP_002293213.1|	RL35, ribosomal protein 35 60S large ribosomal subunit [Thalassiosira pseudonana CCMP1335]	63.33	1e-35	sp|P17078|RL35_RAT	60S ribosomal protein L35 OS=Rattus norvegicus GN=Rpl35 PE=1 SV=3	53.5	5e-09	COG0255	Ribosomal protein L29	J	Translation, ribosomal structure and biogenesis	K02918|1|7e-37|125|gsl:Gasu_07620| large subunit ribosomal protein L35e	GO:0006412//translation	GO:0003735//structural constituent of ribosome	GO:0005840//ribosome
212	EJK46696.1	hypothetical protein THAOC_34623 [Thalassiosira oceanica]	24876.2	0.051	1	5	0.23	0.144	0.01434	EJK46696.1	MGRRPFRCYRYQKNKPYIKSRYCRGVPESKIKIYDVGAKKAPVDLFPFVAHLVCDEKQQISSEALEACRIAINKHLTNTVGKDGYHIRVRVHPFHVIRANKMLSCAGADRLSSGMRHSYGKPIGVAARVDIGQVLLSVRGKDASEPHIVEAIRRGKFKFAGRQKILKSLKWGFTKYPREDYVRMRKSGELAADGNIVKVHNRRGLLENSALYLSGQE	100	1e-160	gi|397569359|gb|EJK46696.1|	hypothetical protein THAOC_34623 [Thalassiosira oceanica]	62.86	3e-93	sp|Q0ITS8|RL101_ORYSJ	60S ribosomal protein L10-1 OS=Oryza sativa subsp. japonica GN=SC34 PE=2 SV=1	144	6e-42	COG0197	Ribosomal protein L16/L10AE	J	Translation, ribosomal structure and biogenesis	K02866|1|3e-94|277|sita:101774666| large subunit ribosomal protein L10e	GO:0006412//translation;GO:0010224//response to UV-B	GO:0003735//structural constituent of ribosome	GO:0044446//intracellular organelle part;GO:0009507//chloroplast;GO:0022626//cytosolic ribosome;GO:0016020//membrane
213	EJK61308.1	hypothetical protein THAOC_18233 [Thalassiosira oceanica]	16152.7	0.252	2	9	0.41	0.112	0.008632	EJK61308.1	MPEVQSVQVFGKKKTATACAFAKQGRGLIKVNGQPIELIEPECLRLKAFEPVLILGQDKFANLDIRIRVKGGGMTAQMYAIRSAIAKSIVAYYAKYVDESAKNELRATLLAYDRNLLVADPRRREPKKYGGRSARARFQKSYR	100	4e-90	gi|397611399|gb|EJK61308.1|	hypothetical protein THAOC_18233 [Thalassiosira oceanica]	66.9	8e-62	sp|O22647|RS16_FRIAG	40S ribosomal protein S16 OS=Fritillaria agrestis GN=RPS16 PE=2 SV=1	136	1e-40	COG0103	Ribosomal protein S9	J	Translation, ribosomal structure and biogenesis	K02960|1|2e-64|196|mpp:MICPUCDRAFT_62402| small subunit ribosomal protein S16e	GO:0006412//translation	GO:0003735//structural constituent of ribosome	GO:0005840//ribosome
214	XP_002286627.1	lysophosphatidic acid acyltransferase-like protein, partial [Thalassiosira pseudonana CCMP1335]	16864.9	0.107	1	1	0.6	0.199	0.0465	XP_002286627.1	HHVERFTAKICTRLFICTDVEIRGMQNLPPDDGSAPAPVYVANHASQVDLAVVYFLSRRFKWISKDSVRYLPGVGLIMSLSQHVFIVRTGKNRKSVSNLYQQSDKAIQSGLPMFFFPQGTRRIAVRLPFKDGAFKVALENESQLVPVSI	100	3e-108	gi|223993887|ref|XP_002286627.1|	lysophosphatidic acid acyltransferase-like protein [Thalassiosira pseudonana CCMP1335]	38.67	1e-20	sp|A8J0J0|LPAT_CHLRE	1-acyl-sn-glycerol-3-phosphate acyltransferase CHLREDRAFT_174358 OS=Chlamydomonas reinhardtii GN=CHLREDRAFT_174358 PE=3 SV=2	85.9	2e-19	COG0204	1-acyl-sn-glycerol-3-phosphate acyltransferase	I	Lipid transport and metabolism	K00655|1|4e-22|94.7|vcn:VOLCADRAFT_105609| 1-acyl-sn-glycerol-3-phosphate acyltransferase [EC:2.3.1.51]	GO:0008152//metabolic process	GO:0003841//1-acylglycerol-3-phosphate O-acyltransferase activity	-
215	EJK75726.1	hypothetical protein THAOC_02542 [Thalassiosira oceanica]	40676.6	0.05	1	3	0.73	0.083	0.0111	EJK75726.1	MADAGTIEAAVSQEEVDKAKEEIEAADPGGEDEAKTEFEVTAEEVSILRAELACEFPDDYKYLSDAYIKSVASKPYSKDPTVRRPLDYTQEKLQNVMEWRAQVRSSRVNRVSVSTKRVRTASQLRSFVQAGAPEMEELVVLANGPANSKEATEDPDRYAKAKALVTSLNNGSLYWHGFTKEGKPILWIRCGRKPWYPNVEAEVNALILIADAGIKCMPEGVTDFVVLSDSNSPPPPVPSFMINVLKALVKGYPDRLNVLLSAPVGSIIQFVMNLLLPLMPGRLADKFLLKDLEQSTPILKEWLMHGEDDIPTFFGGKSNHDELYPDEYYSKNQGEGCLKFDYFGMIERLKTSAKEWEEAQKK	100	0	gi|397643223|gb|EJK75726.1|	hypothetical protein THAOC_02542 [Thalassiosira oceanica]	-	-	-	-	-	-	-	-	-	-	-	-	-	-
216	EJK66477.1	hypothetical protein THAOC_12605 [Thalassiosira oceanica]	12195.4	0.08	1	1	0.71	0.116	0.02386	EJK66477.1	MATDTGNPSTGTTDLKSGPFNVLYKAVKGNTQVLVNVRNNHKLLGRVKAYDRHMNLLLEDVKEMWTEQSKGGKGKKRGTSVNKDRYVSKMFLRGDSVILVVSNPAALAGASQ	100	9e-70	gi|397621815|gb|EJK66477.1|	hypothetical protein THAOC_12605 [Thalassiosira oceanica]	68.82	3e-35	sp|P62317|SMD2_MOUSE	Small nuclear ribonucleoprotein Sm D2 OS=Mus musculus GN=Snrpd2 PE=1 SV=1	-	-	-	-	-	-	K11096|1|2e-36|123|ath:AT2G47640| small nuclear ribonucleoprotein D2	GO:0001510//RNA methylation		GO:0005730//nucleolus;GO:0005732//small nucleolar ribonucleoprotein complex;GO:0005829//cytosol
217	EED95523.1	RS4, ribosomal protein 4 [Thalassiosira pseudonana CCMP1335]	29529.5	0.08	1	3	0.81	0.091	0.03283	EED95523.1	MARGPKKHLKRLNAPRHWNLGKMGGVWAPKPSAGPHKQRECLPVAIILRERLKYALTGKECQQICMERCVKIDGKVRTDHNYPAGFMDVVELEKSGDRFRLLYDTKGRFVLHRIQKDEAEYKLCRIQKGYMSAKKVPVAVTHDGRTLRFPDPDVAVNDTVKVNIATGKMSDIYKFEIGAMIMVTKGHNAGRVGTLEHVEKHDGSFSIVTIKDKKGNTFATRQANVFVIGSGDHPQVTLPKGRGIKKTILQERAEAEARGDL	100	0	gi|223996813|ref|XP_002288080.1|	RS4, ribosomal protein 4 [Thalassiosira pseudonana CCMP1335]	60.32	1e-118	sp|O62739|RS4Y1_MONDO	40S ribosomal protein S4, Y isoform 1 OS=Monodelphis domestica GN=RPS4Y1 PE=2 SV=3	171	6e-51	COG1471	Ribosomal protein S4E	J	Translation, ribosomal structure and biogenesis	K02987|1|9e-121|348|cre:CHLREDRAFT_188837| small subunit ribosomal protein S4e	GO:0006412//translation	GO:0003735//structural constituent of ribosome;GO:0003723//RNA binding	GO:0005840//ribosome;GO:0016020//membrane;GO:0009536//plastid;GO:0044446//intracellular organelle part
218	ACI64448.1	predicted protein [Thalassiosira pseudonana CCMP1335]	58192.5	0.029	1	1	0.8	0.095	0.03206	ACI64448.1	MNDEFVTDLYGNSNASSWGSSAGEVSYEKCVYQRGGEGREVQDAPYRAVHMSQGPLPVGTARRPLQPLSFVDSTNSTVNPDPPDVQRVPCPQPPKRFSDFGEDAPSSLISIDVKQQANASANSMDRSFPVFVQSTRHDVEKKILQEADGITVESRNRKQRQQHPASHRVVKLKKESLMKMERKQQHGGIEEIAMKNAPEDALKVQASSNSKRRRSKTKEQRKRSKSKDNTLSTSERTKDGTRSKRRSLSRSKNSPSDGSGCVTAKRTISVHFSDLDKGQPPTPGRRTMSSSSKPSCSQQLSTRQDIAPSARPHPDLYKPKTKIDYLFLKKMSEGTRISGDTQPLSGSLSSDCSNPETISPTPSEGPPKRTSPYQQRHHDRVDKFSERTGSARTSSEHSP…	100	0	gi|224004160|ref|XP_002295731.1|	predicted protein [Thalassiosira pseudonana CCMP1335]	-	-	-	-	-	-	-	-	-	-	-	-	-	-
219	EED95211.1	fucoxanthin chlorophyll a/c protein [Thalassiosira pseudonana CCMP1335]	27423.7	0.031	1	10	0.54	0.103	0.006752	EED95211.1	MKSVAASLLLASTCAAFAPSNNGAAVKTSLDAMPDRMWNKMVDKTQRSASMPFLPRPINLDGSYVGDVGFDPFYLSSIDKNFAGFIQPPSWEETNGLPTLYWMREAELKHGRVAMLAWTGWLATDGALGPVPLRFPGAAYQAVPNSLSAHDIMVDQGSLGFMLVAIGIIEVCCATVLVEVSKGESDRAAGDFKLDPLQFLKGKSDADINTMKLKELQNGRAAMMAFAGVVTQAALGGTDFPYLVPYPNVADVTW	100	6e-176	gi|223996189|ref|XP_002287768.1|	fucoxanthin chlorophyll a/c protein [Thalassiosira pseudonana CCMP1335]	32.65	7e-13	sp|Q9SDM1|CB121_HORVU	Chlorophyll a-b binding protein 1B-21, chloroplastic OS=Hordeum vulgare GN=LHC Ib-21 PE=1 SV=1	-	-	-	-	-	-	K08907|1|2e-21|93.2|gsl:Gasu_11610|	GO:0009765//photosynthesis, light harvesting		GO:0016020//membrane;GO:0009507//chloroplast
220	EED94486.1	predicted protein, partial [Thalassiosira pseudonana CCMP1335]	84149.5	0.03	2	2	0.78	0.033	0.001332	EED94486.1	NQVVVGGVDDLIGLTHLHEPAILHALLLRYEDDIIYTSTGPILIAINPFKSMPLYTDDVMQQYRLQGERGVSVSGGEVKGSSDDNETATNQSILVSGESGAGKTVTTKIVLNYFAMLSKLVMTDDTNQEEESAAVTSSSVEQQVLDSNPILESFGNARTIRNDNSSRFGKYIDIRFSHNGRLTGASIDTYLLEKVRLIRQTEGERNFHVFYQLLEAATDQERDDYFLGDMKLEDFALVNQSGTYDRRDMVSDVDMHREMLDAMSTMGFDPMMIKNIMRLIVAVLYAGNMTFTEITSHKGETCTLDETEASEAVACLLGVSFEKLAAALTSRVLFLKEEVIIKELSAKQAYKASEALIKSIYGANFDFIVETINKSIHNDKIDKRNDKSAYIGVLDIFGF…	100	0	gi|223998754|ref|XP_002289050.1|	predicted protein [Thalassiosira pseudonana CCMP1335]	40.27	4e-156	sp|F4HXP9|MYO9_ARATH	Myosin-9 OS=Arabidopsis thaliana GN=XI-C PE=2 SV=1	-	-	-	-	-	-	K10357|1|1e-163|504|vra:106770754| myosin V		GO:0005524//ATP binding;GO:0003774//motor activity	GO:0016459//myosin complex
221	XP_002286539.1	predicted protein [Thalassiosira pseudonana CCMP1335]	82040.5	0.028	1	1	0.76	0.134	0.04954	XP_002286539.1	MKQMNLRRRLWISVLPIAADEIDVHQAISARRRRVQYLGSIRANQIFLILATSMQAPLFCFQRIYTMIKTATRLSASLLLLSIACNEAFLQQPSPSSSRPSPSSSARFATSEENQRALLEARLALDKKAKEQQSITINGAGALSKDDPYSFVVGVLGDLHIDPRKMDDYEVGRSHFLSIFDDAKANVGDNNVALVSLGDLGESKNCEHNNDNPFELFAGTTKCHQMAAEYLSSFGVPYDVIGGNHDLEGIDEFETDAKNLRRFLKCHNKETPHFCRQIAEKTLLVGLCSTVFRDATYTSHEVIIDQEQIKWFEELVASKPAEEGWRIFVFSHAPPNGSGIRIIQENHVVNGCCWLNHSDEKSCRKFIELVREHRCIKGWFSGHFHLGQDYQDSITFPTI…	100	0	gi|223993711|ref|XP_002286539.1|	predicted protein [Thalassiosira pseudonana CCMP1335]	-	-	-	-	-	-	-	-	-	-	-		GO:0016787//hydrolase activity	-
222	EJK67751.1	hypothetical protein THAOC_11178 [Thalassiosira oceanica]	132833	0.014	1	1	0.62	0.036	0.0004631	EJK67751.1	MKFQSSVLVGALLSSSAGCLRSGSPRREAGDAAVVVRAAVLRQARVRPPRRAGSVRRYNWNISRQNIAAAARPRRDGARPGRRGRARGARRLHPDARPGRVEALVEDLEPEARQARRRGHDPVDVRARGGHDAVPPPRRAGRGGVLAAATAGGIGKSAVEEDVRRSCPSAIARRLRELGLDDPNVADGIARLAEDHDVDDEDFGAMKTEIYAIYLNGMAKNPLTKTGELKELQSLRSALGLTNQQVGQAHGDAAKMFYRDVQRFTTVDELDDEDHPDRISLDKLLFLTERALRQGGETDKAFTFEFSRVALGLGGLTVDEALERAKDVATPFYERALASTRAKLESGAVSPDMLSRARSTLGIEDFEAKEMHIESFAKEVRVQLGLPEEDDDEYDDYDA…	100	0	gi|397625326|gb|EJK67751.1|	hypothetical protein THAOC_11178 [Thalassiosira oceanica]	-	-	-	-	-	-	-	-	-	-	-	-	-	-
223	EJK76253.1	hypothetical protein THAOC_01996 [Thalassiosira oceanica]	168146	0.078	2	6	0.72	0.141	0.04138	EJK76253.1	MLRPFARGGSPAAFMNKLSGRTSNLRSTGRLMATQSGDDAAPPTALAKLHLEDGTTLTGRSFGCHESQTGEVGVVFTTGMVGYPEALTDPSYQGQIITLTTPMVGNYGVPDRTKLDKFGLPAMFESYKIHASGLIVQDYAHHYSHWKAASSLGDWLKEEGIPGLCDIDTRMLTKKIREKGALVGRIEVDLDAPPPTSWENPNEHRHLVAEVSAKEPRVYGKGNPIKIMGVDCGMKYNMIRLLVDRGCELTVVPWDHPFASDMHNYDGIFLSNGPGDPTSCKETIEQLKQAISVPDNEVKPIFGICLGNQLLGIAAGGEAKKLPFGNRGQNQPVINHATGECYITSQNHGYHIDTTTLGDDYKELFTNLNDASNEGFIHKSRPYFTAQFHPEYRNGPTDT…	100	0	gi|397644104|gb|EJK76253.1|	hypothetical protein THAOC_01996 [Thalassiosira oceanica]	55.09	0	sp|P31327|CPSM_HUMAN	Carbamoyl-phosphate synthase [ammonia], mitochondrial OS=Homo sapiens GN=CPS1 PE=1 SV=2	1527	0	COG0505	Carbamoylphosphate synthase small subunit	EF	Amino acid transport and metabolism;Nucleotide transport and metabolism	K11541|1|0.0|1505|cme:CYME_CMQ255C| carbamoyl-phosphate synthase / aspartate carbamoyltransferase [EC:6.3.5.5 2.1.3.2]!K11540|2|0.0|1459|gsl:Gasu_42540| carbamoyl-phosphate synthase / aspartate carbamoyltransferase / dihydroorotase [EC:6.3.5.5 2.1.3.2 3.5.2.3]!K01955|4|0.0|748|csl:COCSUDRAFT_25106| carbamoyl-phosphate synthase large subunit [EC:6.3.5.5]	GO:0070409//carbamoyl phosphate biosynthetic process;GO:0006543//glutamine catabolic process	GO:0046872//metal ion binding;GO:0005524//ATP binding;GO:0004088//carbamoyl-phosphate synthase (glutamine-hydrolyzing) activity	-
224	EED96409.1	predicted protein, partial [Thalassiosira pseudonana CCMP1335]	14176.5	0.113	1	1	0.35	0.137	0.01136	EED96409.1	YGRGSRKTAQARVWIQPGEGEIVVNRKDFVSYFPREYDREHILGPFVASQTCGKFDVTAVVQGGGLTGQAGAIRLGLARALEKYNPDYRPPMKRHGFMTRDPRMVERKKVGRVKARKSPQWVRR	100	6e-77	gi|223994169|ref|XP_002286768.1|	predicted protein [Thalassiosira pseudonana CCMP1335]	54.03	2e-34	sp|B9MLF6|RS9_CALBD	30S ribosomal protein S9 OS=Caldicellulosiruptor bescii (strain ATCC BAA-1888 / DSM 6725 / Z-1320) GN=rpsI PE=3 SV=1	145	2e-44	COG0103	Ribosomal protein S9	J	Translation, ribosomal structure and biogenesis	K02996|1|3e-37|127|smo:SELMODRAFT_79886| small subunit ribosomal protein S9	GO:0006412//translation	GO:0003735//structural constituent of ribosome	GO:0005840//ribosome;GO:0005739//mitochondrion
225	EJK75265.1	hypothetical protein THAOC_03016 [Thalassiosira oceanica]	48008	0.021	1	3	0.7	0.151	0.04119	EJK75265.1	MIGSVSGRSISRQILRHGIRQRRNITIGTASRQTNASPLRMVGGIGIAGGAAIATLHSVTGSADDFYDYRFETQQDPDDLASFYGGEELMELFCIFPIVGQMMMRNAHFDDQGNVQTLGFPGKMTVSMVFSDESNEETGQTDWFNKRERFTNTLFGVKLWDMVVNFGFRTKEDGTVECYHFGEYFHGSAPVLSQAMLLIFKLHARWVAWSTEHHINHFAFGSALAGDEDVAEEFEHASRANMPLFLLKNYAWSDLKAMVFGTYDSNKPPSFLLKERDEEGRQWDELRERHLGEMAKLRAVRDEIAATEELLPFQRKSIQIQIAEDIEDDRTVIKSMLAHRDTKGFSDVKSLLVKHHTIALKRRSTVRKGGTGEEIDIYKIAKDLAVERAQMRKENDEED…	100	0	gi|397642485|gb|EJK75265.1|	hypothetical protein THAOC_03016 [Thalassiosira oceanica]	-	-	-	-	-	-	-	-	-	-	-	-	-	-
226	XP_002290123.1	RL4e, ribosomal protein 4e 60S large ribosomal subunit [Thalassiosira pseudonana CCMP1335]	41232	0.188	3	11	0.37	0.131	0.008807	XP_002290123.1	MAARPLVSVFSLTGEKAGETTLPEVMTAPMRTDIVQFVHTNMNKNNRQAYAVNVHAGKLVSAESWGTGRAVARIPRVGGGGTSRSGQGAFGNMCRGGRMFAPTKTWRKWHRKINVTQKRYAVASALAATAVPALVMARGHKVDDVPEIPLVLDNTLESAKKTSAAKDILAAVGALADVEKAADSKKIRAGKGKARNRRYTLRRGPLVIYKSNDGVEQAFRNLPGVELCCVDRLNLLQLAPGGHMGRFCIWSQAALDALNTIYGKEGKSIPEDLMANADLARIINSDEIQSVLNPAKRANKKFLRKKNPLTSIKALAKLDPYAAAARESEQRAEAARKDQKAAILKKRRETAKEDSLIVVFAGVLKICSRLRMNIGTGI	100	0	gi|224000902|ref|XP_002290123.1|	RL4e, ribosomal protein 4e 60S large ribosomal subunit [Thalassiosira pseudonana CCMP1335]	60.19	8e-116	sp|Q9SF40|RL4A_ARATH	60S ribosomal protein L4-1 OS=Arabidopsis thaliana GN=RPL4A PE=1 SV=1	193	6e-58	COG0088	Ribosomal protein L4	J	Translation, ribosomal structure and biogenesis	K02930|1|2e-127|374|zma:100194262| large subunit ribosomal protein L4e	GO:0006412//translation	GO:0003735//structural constituent of ribosome	GO:0005840//ribosome;GO:0043231//intracellular membrane-bounded organelle
227	EJK52562.1	hypothetical protein THAOC_28150 [Thalassiosira oceanica]	12856.1	0.131	1	1	0.32	0.03	0.0001514	EJK52562.1	MSGKGKGGRGEKKSTTSSAKAGLQFPVGRIGRYLRQGKYATRMGAGAPVYLAAVLEYLCAEILELAGNAARDNKKARIIPRHITLAVKNDEELNKLLGGVTIASGGVLPNIHAVLLPKKSGK	100	3e-69	gi|397583224|gb|EJK52562.1|	hypothetical protein THAOC_28150 [Thalassiosira oceanica]	88.24	5e-61	sp|P40282|H2A_PLAFA	Histone H2A OS=Plasmodium falciparum PE=2 SV=1	-	-	-	-	-	-	K11251|1|2e-60|184|olu:OSTLU_13104| histone H2A	GO:0006334//nucleosome assembly	GO:0003677//DNA binding	GO:0000786//nucleosome;GO:0005634//nucleus
228	XP_002295845.1	predicted protein, partial [Thalassiosira pseudonana CCMP1335]	9501.24	0.412	2	2	0.79	0.068	0.01161	XP_002295845.1	VGIPIVLLHDAEGAVVTVETKRGELIRGLLFEAEDMMNLYLKKAVVLGPKPGAKRNVEQVYVRGTEIVFIVLPEMLRHAPMFQRI	100	5e-55	gi|224004388|ref|XP_002295845.1|	predicted protein [Thalassiosira pseudonana CCMP1335]	47.62	7e-23	sp|O44437|SMD3_DROME	Small nuclear ribonucleoprotein Sm D3 OS=Drosophila melanogaster GN=SmD3 PE=1 SV=1	-	-	-	-	-	-	K11088|1|2e-24|92.4|vcn:VOLCADRAFT_79410| small nuclear ribonucleoprotein D3			GO:0044424//intracellular part
229	EJK50135.1	hypothetical protein THAOC_30934, partial [Thalassiosira oceanica]	90111.3	0.009	1	1	0.35	0.113	0.00815	EJK50135.1	SVESATLDALTSTLRGCNAHLGGSAIGKGFRLAARYHLHHRAPETALLRNRPGAGEASSSSSSPSPPGRCDCYDASALEPDVAHTIEDPFYVVDLGIVTAQLARWRAAFPRVVPYYAVKCNPDPAIVRTLMSMGCNFDCASRAEIELVRDVASTLPAELSRPDIVYANPCKSRGHVIDAVCRGVRLMTYDNVAEVQKCARVSRKIKLILRIITDDSGSQCRLSSKFGAPPQHWPALLAEARRCGLDVVGVSFHVGSGCRDATRYEMALRDCKRLFEMAERDYGFKMTLLDIGGGFPGETHSMWSPAKAFGDPTSKERPEASVVPPGIPSVTPIREDEEEDDDDEEDDGSSQEGKEPDAISDDDGGKERQYMYFNEIAEAVAPMLDEMFPPESGVRIIAE…	100	0	gi|397576224|gb|EJK50135.1|	hypothetical protein THAOC_30934, partial [Thalassiosira oceanica]	48.6	4e-57	sp|Q9I8S4|AZIN2_XENLA	Antizyme inhibitor 2 OS=Xenopus laevis GN=azin2 PE=2 SV=1	152	2e-38	COG0019	Diaminopimelate decarboxylase	E	Amino acid transport and metabolism	K01581|1|2e-53|197|gsl:Gasu_54820| ornithine decarboxylase [EC:4.1.1.17]	GO:0006596//polyamine biosynthetic process	GO:0003824//catalytic activity	-
230	XP_002288348.1	RL24, ribosomal protein 24 60S large ribosomal subunit, partial [Thalassiosira pseudonana CCMP1335]	13747.8	0.16	2	3	0.5	0.056	0.001126	XP_002288348.1	ELCAMSEYRIWPGTGKLFIRRDGKPIFLGSSKAQSLTLQRKKPAKLVWTQAWRRLHKKGLSETNLKKRRTRTNKVQRAVVGLSLEDIKKKASQKAEFRSAQRDAALKEVKDRKKANKAK	100	6e-81	gi|223997350|ref|XP_002288348.1|	RL24, ribosomal protein 24 60S large ribosomal subunit [Thalassiosira pseudonana CCMP1335]	48.31	2e-28	sp|Q92354|RL24A_SCHPO	60S ribosomal protein L24-A OS=Schizosaccharomyces pombe (strain 972 / ATCC 24843) GN=rpl2401 PE=3 SV=1	-	-	-	-	-	-	K02896|1|6e-27|100|cvr:CHLNCDRAFT_29622| large subunit ribosomal protein L24e			GO:0005840//ribosome
231	EJK46860.1	nitrate reductase [Thalassiosira oceanica]	104105	0.024	1	1	0.8	0.037	0.002311	EJK46860.1	MVLVRSKGAVSESSVDLTTLIKPSTSITNLKRHESFVKKEHTCTELYGPYPSSVPVPMTHKDGRTPSPYVVAKAKTMWDMQSFPDHRDVGTPDEWIPRDGKLVRLTGRHPFNVEPPLFVHQKHKFITPTCLHYVRNHGACPNLAWETHRVRVGGIVPRPLDLSMDEIESMPDRELPVTLVCAGNRRKEQNMIRQTIGFNWGAGGVSTNVWKGVLLRDLLIAAGVSESNMTGKHVEFIGHEDLPNKVGPGPFKDEPWGKLVKYGTSVPLARAMNPAYDILIAYEANGERLQPDHGFPVRLIIPGYIGGRMIKWLTDINVLEHETKNHYHYHDNRILPPHVTAEESLTGGWWYKPEYIFNELNINSAMTAPDHGETIDLAKNIGSTYEVGGYSYTGGGRRI…	100	0	gi|397569621|gb|EJK46860.1|	nitrate reductase [Thalassiosira oceanica]	47.05	0	sp|P39869|NIA_LOTJA	Nitrate reductase [NADH] OS=Lotus japonicus GN=NIA PE=3 SV=1	174	3e-46	COG2041	Periplasmic DMSO/TMAO reductase YedYZ, molybdopterin-dependent catalytic subunit	C	Energy production and conversion	K10534|1|0.0|761|ppp:PHYPADRAFT_184973| nitrate reductase (NAD(P)H) [EC:1.7.1.1 1.7.1.2 1.7.1.3]	GO:0042128//nitrate assimilation;GO:0055114//oxidation-reduction process	GO:0050660//flavin adenine dinucleotide binding;GO:0009055//electron carrier activity;GO:0005506//iron ion binding;GO:0020037//heme binding;GO:0030151//molybdenum ion binding;GO:0046857//oxidoreductase activity, acting on other nitrogenous compounds as donors, with NAD or NADP as acceptor;GO:0043546//molybdopterin cofactor binding	-
232	XP_002293742.1	hypothetical protein THAPSDRAFT_269759 [Thalassiosira pseudonana CCMP1335]	29088.4	0.061	1	3	0.65	0.181	0.04796	XP_002293742.1	MRVASLSVSIIHLISYAAHVQIEEARRKIVDEGTAIPDFGAKADEICSQAIEEFARSAPSPSDDNTASSAYARKLEELESSLDAPLQVLYLRQLSLLREQALSSYRSASKASDASDYEAMLAADAQFLRAAESSTRKASTWTYDAERSHLQTVMSEFAQTTKKLTETQVKSSQQQSTAMQFLQHQQQMIQQLQMQLYGQSSPWNVGVAYRIPDTNFNLQGSYQQGRANVQLSCVPDEYAPMLGPNGFTNGVGPGNLGLSLNLSI	100	4e-155	gi|224009568|ref|XP_002293742.1|	hypothetical protein THAPSDRAFT_269759 [Thalassiosira pseudonana CCMP1335]	-	-	-	-	-	-	-	-	-	-	-		GO:0005525//GTP binding;GO:0016817//hydrolase activity, acting on acid anhydrides	GO:0016021//integral component of membrane
233	XP_002290973.1	syntaxin-interacting protein unc-18 [Thalassiosira pseudonana CCMP1335]	68288.8	0.013	1	1	0.7	0.082	0.008875	XP_002290973.1	MVLVVDPESLRVISSSIGMYNLMEHHVSIVEDLTKGRAPFRDQAVLYFVEPTEESLNRIIEDWTPKKGSKKGPLYGDVVFLYFLGRLPDELFAKIKGCKELVKRVKVLKEVNLDFLTKEADAFHFDMKDASIYSELYLSDPRSTTALNERMMSKLVTVCATLNEYPHVRFPAKNALCKNLAFVFQQKMNEFVGSNREWWYNGDGIHPNSERATLLILDRKDDCLSPLMHEFTYEAMVNDLLPIDDDRITYDSVNAGTAKEGSAEATTKMDALLNDNDEVWVELRGKHIADVIQTLSAKIREIVNSSSGSAFNSSSKSKKSLSISQMAKALKALPEYREIMSKLSQHMQIAHQCMDAFNAQGLLGLSDLEQTLATGKTDEGRTPKLKHLLGQVVEEFRKQ…	100	0	gi|224002603|ref|XP_002290973.1|	syntaxin-interacting protein unc-18 [Thalassiosira pseudonana CCMP1335]	32.03	9e-76	sp|Q54QC8|SEC1_DICDI	Protein transport protein sec1 OS=Dictyostelium discoideum GN=sec1 PE=3 SV=1	-	-	-	-	-	-	K15292|1|1e-54|200|ppp:PHYPADRAFT_228795| syntaxin-binding protein 1	GO:0006904//vesicle docking involved in exocytosis	-	-
234	YP_009093487.1	preprotein-translocase subunit a (chloroplast) [Thalassiosira weissflogii]	101373	0.084	1	1	0.36	0.153	0.01608	YP_009093487.1	MLKNPFIKNSVTNQYQTLINQINALENNLKTLTDTDLRNKTFQLKNQYQEKRNLDSLIAEAFAITREASFRTLGLRHFDVQLIGGLVLNSGKISEMRTGEGKTLVATLPAYLNALTNKGVHVVTVNDYLASRDQISMGQIYRFLGLDTGLIQEDMSFLERQQNYRADITYVTNNEVAFDYLRDNMASNLNQVVLPPFNYCIVDEVDSIFIDEAQVPLIISQAVETCIDKYIVAAEVAEYLEVNVHFKVDEKNRNIILTEQGTAQIEKILQVEDLYNLNDPWIPYILSAIKATALFFKNVHYIVQNNQIVIVDEFTGRIMPDRRWNEGLHQAVEAKEGVPIRQNTETAASITYQNFFLLYPKLSGMTGTAKTSELEFEKIYNLSVEEIPTARPNLRKDLP…	100	0	gi|700082689|ref|YP_009093487.1|	preprotein-translocase subunit a (chloroplast) [Thalassiosira weissflogii]	92.94	0	sp|A0T0V8|SECA_THAPS	Protein translocase subunit SecA OS=Thalassiosira pseudonana GN=secA PE=3 SV=1	852	0	COG0653	Preprotein translocase subunit SecA (ATPase, RNA helicase)	U	Intracellular trafficking, secretion, and vesicular transport	K03070|1|0.0|794|gmx:100815860| preprotein translocase subunit SecA	GO:0017038//protein import;GO:0065002//intracellular protein transmembrane transport;GO:0006605//protein targeting	GO:0005524//ATP binding	GO:0005886//plasma membrane;GO:0009570//chloroplast stroma;GO:0009535//chloroplast thylakoid membrane
235	EJK54843.1	hypothetical protein THAOC_25495, partial [Thalassiosira oceanica]	17812.3	0.049	1	1	0.58	0.07	0.002667	EJK54843.1	MAGLALYDRHVRGGRGPTYLRTSRVNLAFGFGNVILSPWKQNPGRGKGLGGHTSSSRRERKVFALQPFFPRPPTLRRQQQQQQQQQQQQQQEERINAGPEVSTFPDAGPEVGAKGSAFGSMTTLAAPPLIVFSTRPLRVSGAYLSCVPKLKNLADPAAAACRS	100	1e-101	gi|397589921|gb|EJK54843.1|	hypothetical protein THAOC_25495, partial [Thalassiosira oceanica]	-	-	-	-	-	-	-	-	-	-	-	-	-	-
236	EED94096.1	predicted protein [Thalassiosira pseudonana CCMP1335]	23083.7	0.042	3	7	2.28	0.485	0.00462	EED94096.1	MKFTTGLIASFACGATAFAPSSTITKQSTALNLAVGDTAPDFSLVDQNGKTFTRSKNKKPLVVYFYPADSTPGCTVQAKEFQKEIQAIRKEFKADVVELITLTDFLHFFVFYCSCVGISGQGAESKQKFAQELGLDFSILADEGDAVRSAFKVPKAAFGFLPGRVTYVLDKNGVCTSVYDNIADAASHIGAAKEALAAMKPAKKGGFEFSLPF	100	2e-142	gi|223997974|ref|XP_002288660.1|	predicted protein [Thalassiosira pseudonana CCMP1335]	41.11	3e-36	sp|Q9MB35|PERQ_SEDLI	Peroxiredoxin Q, chloroplastic (Fragment) OS=Sedum lineare GN=PRXQ PE=1 SV=1	122	1e-33	COG1225	Peroxiredoxin	O	Posttranslational modification, protein turnover, chaperones	K03564|1|4e-36|129|sind:105173718| peroxiredoxin Q/BCP [EC:1.11.1.15]	GO:0055114//oxidation-reduction process	GO:0016209//antioxidant activity;GO:0016491//oxidoreductase activity	GO:0044434//chloroplast part
237	XP_002286873.1	aspartate-trna ligase [Thalassiosira pseudonana CCMP1335]	54002.1	0.059	1	2	0.69	0.13	0.02651	XP_002286873.1	MIQSATKSEEGVNKWTKIGALEKEMEGKKVVVRGHLHTSRGVGKGAFVVLRSSLYTVQCVAFESIEIPSAMIKYMTGVPVESIVDVCGVLTCPEKAVEGATQSDVEIQVHSYHCVQKATAPMPFQMEDACRPDLVKETDVASEGGRVGQETRLDHRWIDLRTPANQSIFRIQSMVCTLFREYLLKQNFIEIHTPKILSGASEGGADVFTLDYFGKPACLSMSPQLHKQMAAACGGFERVFEIGPVFRAENSNTRRHLCEFTGLDLEMAIMEHYDEVLDVLGELFVYIFDGLKEKCGQELERIKEQHGFEDLQYLRKTLKIDYATGCRLLREAGVDQDDLDDLSTENEKKLGDIVKEKYNTDFYIMDKYPLSVRPFYTMPDPNNPKLSNSYDIFIRGQEI…	100	0	gi|223994379|ref|XP_002286873.1|	aspartate-trna ligase [Thalassiosira pseudonana CCMP1335]	52.52	3e-178	sp|Q8H104|SYDC1_ARATH	Aspartate--tRNA ligase 1, cytoplasmic OS=Arabidopsis thaliana GN=At4g26870 PE=2 SV=1	373	6e-124	COG0017	Aspartyl/asparaginyl-tRNA synthetase	J	Translation, ribosomal structure and biogenesis	K01876|1|0.0|553|csv:101222217| aspartyl-tRNA synthetase [EC:6.1.1.12]	GO:0006422//aspartyl-tRNA aminoacylation	GO:0003676//nucleic acid binding;GO:0005524//ATP binding;GO:0004815//aspartate-tRNA ligase activity	GO:0005737//cytoplasm
238	YP_004072616.1	30S ribosomal protein S4 (chloroplast) [Thalassiosira oceanica CCMP1005]	23559.8	0.063	1	1	0.78	0.11	0.03653	YP_004072616.1	MSRYRGPKLRITRRLGKLPGLTQKTSKKTARPGQHGKTLGDGKKKTTEYGLRLEEKQKLKFNYGITESQLYHYIKEARRRKGVTGLILLQLLEMRLDTICFSLGFAPTIAAARQIVNHGHITVNNKVVDIPSFQCQINDVIGVKAKSTSKNIIENNIKTINFIEPPTHLILDKSKLEGTVKNYCDRNELLLDLNELLVIEYYSRR	100	3e-112	gi|315320559|ref|YP_004072616.1|	30S ribosomal protein S4 [Thalassiosira oceanica CCMP1005]	84.88	2e-99	sp|A0T0W7|RR4_THAPS	30S ribosomal protein S4, chloroplastic OS=Thalassiosira pseudonana GN=rps4 PE=3 SV=1	248	6e-83	COG0522	Ribosomal protein S4 or related protein	J	Translation, ribosomal structure and biogenesis	K02986|1|3e-57|182|ppp:PhpapaCp037| small subunit ribosomal protein S4	GO:0006412//translation	GO:0003735//structural constituent of ribosome;GO:0019843//rRNA binding	GO:0015935//small ribosomal subunit;GO:0009507//chloroplast
239	EED95131.1	guanyl nucleotide exchange factor, partial [Thalassiosira pseudonana CCMP1335]	34866.4	0.061	4	23	0.38	0.187	0.03896	EED95131.1	MMECSSIAQTYEKTSFNEPDTEDQSAAFALSPQLSPAPHARSEDDDIVDYWHTSIERRKAPLQPLLIVPSSSQGIPSFESETPQSLSIKNSRSEDSSKYALSQQKKESLDVAFEIISSKGLKKGLDYLIACHLLTPSPRDVSSFLRIQQSSIDPVILGEYLGEGGIDGADKDYWNQIRFNYARAISFVGMNVEQALRHFLTACGFRLPGEAQKIDRIISTFSQCYWEDNAGDLQKCPFQDQDTVFLVSFAIIMLNTDLHKASGTKGKAPKKMSRNEFIANLRGVYSSAEKFRDYLIAIYDSIESNPIAIS	100	0	gi|223996029|ref|XP_002287688.1|	guanyl nucleotide exchange factor [Thalassiosira pseudonana CCMP1335]	32.78	1e-28	sp|O46382|BIG1_BOVIN	Brefeldin A-inhibited guanine nucleotide-exchange protein 1 OS=Bos taurus GN=ARFGEF1 PE=1 SV=1	92.8	2e-19	COG5307	Guanine-nucleotide exchange factor, contains Sec7 domain	R	General function prediction only	K18442|1|4e-32|130|sbi:SORBI_10g024440| brefeldin A-inhibited guanine nucleotide-exchange protein	GO:0032012//regulation of ARF protein signal transduction	GO:0005086//ARF guanyl-nucleotide exchange factor activity	GO:0005622//intracellular
240	EJK64680.1	hypothetical protein THAOC_14563 [Thalassiosira oceanica]	31005.5	0.148	1	1	0.74	0.056	0.003976	EJK64680.1	MDKVLSRISSAAGALTVGAFTVNSCLYNVDGGERAVLFDTLRGGILPDVRDEGTHLMIPVIQRPIIIDVRTKPREIPSVTGTKDLQMVNIKLRVLWRPVIEKLPQLYRELGTDFDERVLPSIGNEVLKSVVAQYNAEELLSKRAEVSARIKAELIKRGAHFHLTLDDVSITHLTFGREFMKAIESKQVASQEAERQQYVVMRAEQERIANVTRAEGEAEAATIITKAMEKTGNAIVEVRRIDAAKEIATKLAKGRNITYLPGGGSGGGSDNGNSPGLLLSVDK	100	0	gi|397617939|gb|EJK64680.1|	hypothetical protein THAOC_14563 [Thalassiosira oceanica]	54.51	4e-93	sp|O04331|PHB3_ARATH	Prohibitin-3, mitochondrial OS=Arabidopsis thaliana GN=PHB3 PE=1 SV=1	140	3e-38	COG0330	Regulator of protease activity HflC, stomatin/prohibitin superfamily	O	Posttranslational modification, protein turnover, chaperones	K17080|1|2e-98|293|ppp:PHYPADRAFT_109165| prohibitin 1			GO:0016020//membrane
241	XP_002288593.1	ABC transporter [Thalassiosira pseudonana CCMP1335]	158723	0.006	1	1	0.67	0.115	0.01734	XP_002288593.1	MTAVIDEEAPEINADEKKDDASDDGFNNFLKFVQPNNKDVNDDGDDRSEASEGYKNFLQFLQTVPSPAAVAPPSSKAGKTMQELEKASEDVALLNGSADKPPKDGATTTALATKKSKKKKKKDPETAPATLSQVLSFLPTTQDHALLVAGIFFGVLNGLVFPALAYIFSNSFSNLGSTTEGLGPIREIAFTFLGVGAYAFVVAALQNMAFEILSVRAADNFKKMWFASLLRQDAAFHDIHSVSGMATALSSASSKMKRGLGRKLGEGIQFGTTFVGGIIYAFYSSWRVALVVLALLPVVSFAAYFLMQLNQNQTSNAQKAYTAAGSTAYGAVSSIRTVLSLNAVPEMIRQYCVATKEAYNNGVRPLFKLGMVNGSMLGSFILLYAVLTLYGGYLLYSEV…	100	0	gi|223997840|ref|XP_002288593.1|	ABC transporter [Thalassiosira pseudonana CCMP1335]	35.15	5e-102	sp|Q6YUU5|MDR_ORYSJ	Putative multidrug resistance protein OS=Oryza sativa subsp. japonica GN=Os02g0190300 PE=3 SV=1	271	1e-76	COG1132	ABC-type multidrug transport system, ATPase and permease component	V	Defense mechanisms	K05658|1|8e-134|451|fve:101306304| ATP-binding cassette, subfamily B (MDR/TAP), member 1 [EC:3.6.3.44]	GO:0055085//transmembrane transport;GO:0006200//ATP catabolic process	GO:0042626//ATPase activity, coupled to transmembrane movement of substances;GO:0005524//ATP binding	GO:0016021//integral component of membrane
242	EED93720.1	calcium transporting ATPase [Thalassiosira pseudonana CCMP1335]	104536	0.009	4	11	0.64	0.146	0.02777	EED93720.1	MSYIIEQFDDKLVRILLVVACVSAFFGLVELKEEMGEWALVEPIVITTILIINALVGGYQSLNASKGISALKQMQAQKASAIDEVEVDASSLVPGDVVILTVGQKIPADIRLMSVSTSTFTVDEACLTGESDSVPKIPYKGDVQNDEEHNGHHANGMLYGGTVITAGKGVGVVVRTGMDTEMGKIQCGVTEAASDENAHRTPLAIKLDEFGDTLTVVIGVICTAVWVASIPKFYDPTFKTPIEGAVYYAKVAVALGVAALPEGLPAVITLCLSLGTRRMAKRNVIVRKLQSVETLGCTSVICTDKTGTLTTNEMTAVSLVLLESDEEGGVLVAEHEVSGTSYSPIGTIKGVQHSSEIADNPKGSVSDVAAVASLCNDAIIAASKTYERMGEPTEAALCV…	100	0	gi|223997222|ref|XP_002288284.1|	calcium transporting ATPase [Thalassiosira pseudonana CCMP1335]	44.28	0	sp|Q9XES1|ECA4_ARATH	Calcium-transporting ATPase 4, endoplasmic reticulum-type OS=Arabidopsis thaliana GN=ECA4 PE=2 SV=2	535	2e-174	COG0474	Magnesium-transporting ATPase (P-type)	P	Inorganic ion transport and metabolism	K01537|1|0.0|736|nnu:104594684| Ca2+-transporting ATPase [EC:3.6.3.8]	GO:0006754//ATP biosynthetic process;GO:0006812//cation transport	GO:0005388//calcium-transporting ATPase activity;GO:0046872//metal ion binding;GO:0005524//ATP binding	GO:0016021//integral component of membrane
243	XP_002289747.1	predicted protein [Thalassiosira pseudonana CCMP1335]	30177.4	0.151	2	4	0.75	0.065	0.006947	XP_002289747.1	MKFSISTATIFIGATSSCVAFAPSASSVVRASVNNNNAKIVKNGPLFMADDNEEGWSAPKSAMVGGAGVNNAGEPPFEIRGFSLGNFITIAGIAVTVLSFAEYLSSSGGDGLNVSGLGFVYGIPITLAGAALKYAEIDPVPCISSSAADAAFESKATEIIKKIKQDVTRHRYGDEAHLDTTVKKLGLVVPGKAYPQLMELRQDVTDGGDLAFTMVWQSLDTPYKMWADEKRRKRYETFFGPGVGAEVVKIDAEQRLVGIRLTTGGPLSEEYLASKVEKEAVATA	100	1e-180	gi|224000149|ref|XP_002289747.1|	predicted protein [Thalassiosira pseudonana CCMP1335]	34.04	7e-21	sp|Q55403|Y575_SYNY3	Thylakoid membrane protein slr0575 OS=Synechocystis sp. (strain PCC 6803 / Kazusa) GN=slr0575 PE=4 SV=1	-	-	-	-	-	-	-	-	-	-
244	EED87694.1	polyadenlyte binding protein, partial [Thalassiosira pseudonana CCMP1335]	66785.5	0.075	1	1	0.71	0.043	0.001327	EED87694.1	QQSANFSSASLYIGDLLPEVNEGFLFEIFNAVGPVASIRVCRDAVTRRSLGYAYVNYHQVADAERALDSMNFTEIKGKPCRIMWSQRDPSMRRSGVGNIFVKNLHEGIDNKQLYDTFSLFGNILSCKVVTDKATGLSKGYGYVHYETNEAAASAIEKLDGMLIDGKEVQVGVFMRRDNRPGQADWTNVFIKNIPFEWTEDKLREEFEGFGEVVSAKPKEVQGSLGFGFVNFATHEAAAAAVKEMNDKEFTVTEDGEEVTKVLFVGRAQKKAERERELRAKYEAEKIDRIAKFQGVNLYVKNLDDTVTDDVLRDEFSAMGTITSARVMKDLKTGISRGFGFVCYSTPEDATRAVNEMNGKIILGKPIFVALAQRRDVRRAQLEAQHNQGRGNLPGPMGGA…	100	0	gi|224012523|ref|XP_002294914.1|	polyadenlyte binding protein [Thalassiosira pseudonana CCMP1335]	57.14	9e-144	sp|P31209|PABP_SCHPO	Polyadenylate-binding protein, cytoplasmic and nuclear OS=Schizosaccharomyces pombe (strain 972 / ATCC 24843) GN=pab1 PE=1 SV=2	75.5	9e-15	COG0724	RNA recognition motif (RRM) domain	J	Translation, ribosomal structure and biogenesis	K13126|1|2e-144|436|cvr:CHLNCDRAFT_59028| polyadenylate-binding protein		GO:0000166//nucleotide binding;GO:0003723//RNA binding	-
245	XP_002291214.1	predicted protein [Thalassiosira pseudonana CCMP1335]	111294	0.009	1	1	0.65	0.048	0.001373	XP_002291214.1	MRAFAFLLSSVAFLLYTLILLMASFYLSYNQFLLPLFDYSRSLESTKWLQQTYYQRWCTIDDVLPLAATDLVAIEDEDMITQAASNLDQLYTHGAVVLPSLLPLNITRQLREVILSKNKAQSRSDQFYVLNHDYRYSLVTSIHHGHDLVHDPDDHLSRALSHIASNTKLKALLTSALHDDDPSLVEMSAITVLYGAESQPWHADTLPDQSSLLFGNTYSDLYTVFVALQDTSNEMGATELCLGTHMCGDWEEEHHRFVPNVNSDGGGKWETSKPHMCDQVKEFTLPNGTSVKRRRGVQVPLKAGDAFVYNSELIHRGRDHVDLLATERVQLLLSFTSRPMQILGKDFDGNEVVDWRVPPNGATYALKWDSWGRTLSDLAVKRSDTSTFTRRVGLDSSIS…	100	0	gi|224003085|ref|XP_002291214.1|	predicted protein [Thalassiosira pseudonana CCMP1335]	-	-	-	-	78.2	4e-15	COG3205	Uncharacterized membrane protein	S	Function unknown	-	-	-	-
246	EJK71504.1	hypothetical protein THAOC_07047 [Thalassiosira oceanica]	27317.9	0.042	2	6	0.79	0.11	0.04185	EJK71504.1	MPKSKREKRVALTQTAKKTREHKTNYVETVREAIDGNDRIYLFSYENMRSNHFKDVRLHFRGGNKNDDIMTDDGDGDSSGEGRIFLGKNKLLQIALGRTPEDEYSDNLHQVSKNLTGSVGILCTTQSADDVEEYFSSLSVVDYARAGVLSPQTVRLTQKQVETHPVSMVELFRKLGLPVEVKNGRVSFIGERPEFEVCKEGKELSVEQCKILVHFGIKLSTFKISLVSRWEKSDGSVEEF	100	3e-168	gi|397634608|gb|EJK71504.1|	hypothetical protein THAOC_07047 [Thalassiosira oceanica]	40.42	7e-59	sp|A4FV84|MRT4_BOVIN	mRNA turnover protein 4 homolog OS=Bos taurus GN=MRTO4 PE=2 SV=1	53.1	2e-06	COG0244	Ribosomal protein L10	J	Translation, ribosomal structure and biogenesis	K14815|1|5e-52|171|bna:106361936| mRNA turnover protein 4	GO:0042254//ribosome biogenesis		GO:0005840//ribosome
247	EJK66267.1	hypothetical protein THAOC_12827 [Thalassiosira oceanica]	81266.4	0.061	1	1	0.79	0.102	0.0337	EJK66267.1	MEAGGDDEAVNKTNRVSSQLKAIYKDNILPAEKRYKYDFFYESPFLTDVEFDAKPQVMLVGQYSVGKTSFIRYMLGRDFPGARIGPEPTTDRFTCLINGPDERTIPGNALSVHPDLPFRGLERFGVSFLSRFEGSQLPSSVLRSITLVDTPGILSGEKQRVNRGYDFTKVVAWFADRADMIILLFDAHKLDISDELKATIDVLKGHEDKIRCILNKADEINRQQLMRVYGALLWSLGKTIDSPEVLRVYTGSFWSEPLKNMDNSELFEQEEGDLMRDLAILPRQSAVRKINELVKRIRKVKTLAYIIGHLKSQMPTVMGKEKKQQKLIADMPNVFRTIMKKHNLPPGDFPDINKFTEKLKECKFSEFKSLKLDEIQLLEDCLTNHLPRLMEELPSEKDS…	100	0	gi|397621391|gb|EJK66267.1|	hypothetical protein THAOC_12827 [Thalassiosira oceanica]	49.05	9e-168	sp|Q9NZN4|EHD2_HUMAN	EH domain-containing protein 2 OS=Homo sapiens GN=EHD2 PE=1 SV=2	119	2e-26	COG0699	Replication fork clamp-binding protein CrfC (dynamin-like GTPase family)	L	Replication, recombination and repair	K12483|1|6e-144|435|sind:105176661| EH domain-containing protein 1		GO:0005509//calcium ion binding;GO:0005525//GTP binding	-
248	EJK54517.1	hypothetical protein THAOC_25849, partial [Thalassiosira oceanica]	61095.7	0.025	1	1	0.81	0.091	0.0313	EJK54517.1	MFTCSGVEIEPRPFREPDPPYEESYLNRFQFDSGKPLFGGRDDGGSSCSTTAHSSCCEQSQLSGMGELDGDFGAGDTRGGIFVFDMNHLQEEPARTETIFGCDYDLPRLSHHEIDRRMQTETQELRDRAELMLQREQRQLRLSSKAAAVSASTVDAVCRSRMFEWALLVVSHSFPCQSGQISDPKGYTRQYSTEAIQIVTQAFALVDQIPCQIRNEYKLYCMVALHIVAKSSGLFSPSKERISEQQCSDRSRIGSASSSPKQSTSGGDPSDLRACAVTPEDEAHRPSRPALDLLSLEGLAGVEGERRHRAGLARLDDVPAPALPGLLRRERGRRARPAPARGGRGAPTDRAAGGIPPRAVPGRDRLVLRGHEAVRGGRRLPEGGGRYLSGLRGVRDEMT…	100	0	gi|397589066|gb|EJK54517.1|	hypothetical protein THAOC_25849, partial [Thalassiosira oceanica]	-	-	-	-	-	-	-	-	-	-	-	-	-	-
249	sp|A0T0Q5.1|RK11_THAPS	RecName: Full=50S ribosomal protein L11, chloroplastic	14909.1	0.05	2	2	0.49	0.039	0.0004011	sp|A0T0Q5.1|RK11_THAPS	MPKKITALIKLALPAGKATPAPPVGPALGQHGVNIAAFCKEYNARTTEKMGLIIPVEISVYEDRSYTFILKTPPASVLLANAAKVKKGSATPNRVNVGSVTKAQLEEIANIKLPDLNTTEISSAIRIVEGTARNMGITVSD	100	9e-98	gi|118411123|ref|YP_874517.1|	50S ribosomal protein L11 [Thalassiosira pseudonana]	100	1e-98	sp|A0T0Q5|RK11_THAPS	50S ribosomal protein L11, chloroplastic OS=Thalassiosira pseudonana GN=rpl11 PE=3 SV=1	222	3e-74	COG0080	Ribosomal protein L11	J	Translation, ribosomal structure and biogenesis	K02867|1|7e-63|193|ppp:PHYPADRAFT_143578| large subunit ribosomal protein L11	GO:0006412//translation	GO:0003735//structural constituent of ribosome;GO:0019843//rRNA binding	GO:0005840//ribosome;GO:0009507//chloroplast
250	EJK60029.1	hypothetical protein THAOC_19689 [Thalassiosira oceanica]	126479	0.048	1	2	0.52	0.11	0.007654	EJK60029.1	MCLSAAVMGSRGSLSYLRYQTTERDFYVSAPLLTHFNIHSGKNKRLTKSKKGSKKKAVDPFLKKDWYKLIAPSIFSQKECGKTIITRTQGQKIASEGLKGRVIELSLGDLNQNEASSYRKIKLCVEDVQGFNCLLNFHGMDMTRDKLCSLIKKKQSIIEANVDARTTDGYIVRMFCIAFTKKQDDQLKETCYAKSAKERSIRAKMVSTMATLAGKGDLKTLVKALVAGTTGDEIVREASSIFPIKDCYIRKVKVIKKPKFDVTALMEWHNDDGQDVGQNVAPAVAEETVAGSGGRLSRVQTAHEDENGVKGQAEDLTYSTMFGDPSSPLTWEILSRLAGASTSSSGEARPFYVQRAGPGGEEPRVDEDEQFFFADPLGSASAASLSVCSRDTASERLLR…	100	0	gi|397608572|gb|EJK60029.1|	hypothetical protein THAOC_19689 [Thalassiosira oceanica]	57.26	9e-81	sp|Q285L8|RS3A_TOBAC	40S ribosomal protein S3a OS=Nicotiana tabacum GN=cyc07 PE=2 SV=1	102	1e-22	COG1890	Ribosomal protein S3AE	J	Translation, ribosomal structure and biogenesis	K02984|1|2e-81|270|sly:101260518| small subunit ribosomal protein S3Ae	GO:0006412//translation	GO:0003735//structural constituent of ribosome	GO:0005840//ribosome
251	EJK76680.1	hypothetical protein THAOC_01544, partial [Thalassiosira oceanica]	21988.7	0.041	2	3	0.56	0.102	0.00756	EJK76680.1	MSNKLNSAILDKAAEDVLAFSSGETINKNGADLQGKKRNFVETVEIQITLKNYDPQRDKRFSGTFKLPSIPRPNLKPCMLGNAAHCEQADRIGVAHMSVDDLKKLNKNKKLVKKLAKKYDFFLASDNMIKQIPRLLGPGLTKAGKFPTLLSSSDDMQEKIDEIKATIKFQMKKVMVLNVAIGNVDMEKQQIIVNTQ	100	1e-127	gi|397645072|gb|EJK76680.1|	hypothetical protein THAOC_01544, partial [Thalassiosira oceanica]	63.01	4e-64	sp|Q8VZB9|R10A1_ARATH	60S ribosomal protein L10a-1 OS=Arabidopsis thaliana GN=RPL10AA PE=1 SV=1	85.5	5e-19	COG0081	Ribosomal protein L1	J	Translation, ribosomal structure and biogenesis	K02865|1|3e-65|203|sind:105171044| large subunit ribosomal protein L10Ae	GO:0006412//translation	GO:0003735//structural constituent of ribosome;GO:0003723//RNA binding	GO:0009506//plasmodesma;GO:0005886//plasma membrane;GO:0022625//cytosolic large ribosomal subunit
252	EJK52343.1	hypothetical protein THAOC_28390 [Thalassiosira oceanica]	17999.4	0.094	2	7	0.45	0.055	0.0009766	EJK52343.1	MSIIKKPDLTDPKLRAKLAKGMGHNYYGEPAWPNDLLYLFPVCILGTFACCIGLAVMAPTQMGEPADPFNTPLEILPEWYFFPTFNLLRVLPNKLLGVLAMAAVPAGLITVPFIENVNKFQNPFRRPIASLVFIFGFFFAVWFGIGACLPIDKAVSLGYW	98.75	5e-99	gi|118411155|ref|YP_874549.1|	cytochrome b6-f complex subunit IV [Thalassiosira pseudonana]	98.75	8e-100	sp|A0T0T7|PETD_THAPS	Cytochrome b6-f complex subunit 4 OS=Thalassiosira pseudonana GN=petD PE=3 SV=1	253	6e-86	COG1290	Cytochrome b subunit of the bc complex	C	Energy production and conversion	K02637|1|4e-83|246|olu:OSTLU_32458| cytochrome b6-f complex subunit 4	GO:0009767//photosynthetic electron transport chain;GO:0022904//respiratory electron transport chain	GO:0016491//oxidoreductase activity;GO:0045156//electron transporter, transferring electrons within the cyclic electron transport pathway of photosynthesis activity;GO:0045158//electron transporter, transferring electrons within cytochrome b6/f complex of photosystem II activity	GO:0016021//integral component of membrane;GO:0009535//chloroplast thylakoid membrane
253	YP_009093249.1	ribosomal protein S11 (chloroplast) [Roundia cardiophora]	13802.4	0.185	2	3	0.56	0.122	0.01206	YP_009093249.1	MAQKIRKSTVKKNRSNLGTGVVHIQSTFNNTIVTITNITGDTISWASSGSSGFKGARKGTPFAAQTAAEKAALEALSTGIKTVEILVKGQGSGRETAIRSIEGAGLEILSIQDITPVPHNGCRPRKRRRV	98.46	8e-62	gi|700082724|ref|YP_009093522.1|	ribosomal protein S11 (chloroplast) [Thalassiosira weissflogii]	94.62	3e-59	sp|A0T0Z3|RR11_THAPS	30S ribosomal protein S11, chloroplastic OS=Thalassiosira pseudonana GN=rps11 PE=3 SV=1	182	7e-59	COG0100	Ribosomal protein S11	J	Translation, ribosomal structure and biogenesis	K02948|1|4e-28|103|ppp:PhpapaCp061| small subunit ribosomal protein S11		GO:0003723//RNA binding	GO:0030529//ribonucleoprotein complex;GO:0009536//plastid
254	XP_002296651.1	chloride channel protein 7, partial [Thalassiosira pseudonana CCMP1335]	75712.8	0.031	1	5	0.61	0.156	0.02802	XP_002296651.1	LKRWGLTLVVGVLQAMIATTCNMASRRLGSMKYDHVYALGGMDDYVDGNGANSPFLAFLFYQTVFALAASLFVYIEPVAAGSGIPEVKCFLNGIDLPRIVRFKTLVCKVVGVTFSVAAGLPVGKEGPMVHSGSVVAAGISQGRTKFWGVDTSFSKFSDFRNDREKRDFVACGAAAGVASAFGAPIGGVLFSLEEGASYWSTKLTWRAFFCAMITLGTAFMIRNQDSKWGQANVDKLFSFGEFTAIGEGTINFSVWELLLFILIGCLGGLIGAVFNAGNEHLTIWRMKHVNFSKKRRVVEVVVMSLIVTTVSFVMPLLWNRCTELPTDMQDWTNQEKELPGKEYNEVASLFFCEADAAIRQLFHFRETGETDTSTFSSAALFLFFIPYITLASLVYGIAV…	100	0	gi|224013975|ref|XP_002296651.1|	chloride channel protein 7 [Thalassiosira pseudonana CCMP1335]	42.71	7e-142	sp|O70496|CLCN7_MOUSE	H(+)/Cl(-) exchange transporter 7 OS=Mus musculus GN=Clcn7 PE=1 SV=1	125	7e-28	COG0589	Nucleotide-binding universal stress protein, UspA family	T	Signal transduction mechanisms	K05016|1|1e-97|321|sita:101764449| chloride channel 7	GO:0055085//transmembrane transport;GO:0006821//chloride transport	GO:0005247//voltage-gated chloride channel activity	GO:0016021//integral component of membrane
255	EJK50611.1	hypothetical protein THAOC_30354, partial [Thalassiosira oceanica]	5012.51	0.261	1	1	0.74	0.115	0.02825	EJK50611.1	MGFSRYVEVGRVVYINYGADAGKIATVIDIVDQNKCLVDGPEEITG	100	2e-27	gi|397636985|gb|EJK72485.1|	hypothetical protein THAOC_05982 [Thalassiosira oceanica]	59.52	1e-14	sp|Q9T043|RL142_ARATH	60S ribosomal protein L14-2 OS=Arabidopsis thaliana GN=RPL14B PE=1 SV=1	-	-	-	-	-	-	K02875|1|2e-14|65.1|ath:AT4G27090| large subunit ribosomal protein L14e	GO:0001510//RNA methylation;GO:0006412//translation;GO:0042254//ribosome biogenesis	GO:0003735//structural constituent of ribosome	GO:0005730//nucleolus;GO:0009506//plasmodesma;GO:0005774//vacuolar membrane;GO:0009507//chloroplast;GO:0022625//cytosolic large ribosomal subunit;GO:0005783//endoplasmic reticulum;GO:0005794//Golgi apparatus
256	XP_002290949.1	predicted protein, partial [Thalassiosira pseudonana CCMP1335]	22305.3	0.065	1	1	0.81	0.06	0.01069	XP_002290949.1	TILYSHANAEDLGNIYPWCKFLSKMLGVNIFAYDYTGYGLATDQDPSEEYCFADISTAYTYLTQTLLIPPTSILLYGRSLGSGPSCFLASRTAEEGHAVGGLILHAPFMSVYRIVIESGCTLPGDRFPNVDFAPSIRSPVLLIHGTKDSIVPFNHSERLLETVIEPYRADPLFIKGMGHNNVHASVRPLFIEKLRKYLD	100	8e-147	gi|224002555|ref|XP_002290949.1|	predicted protein [Thalassiosira pseudonana CCMP1335]	38.19	2e-39	sp|Q5XIJ5|AB17A_RAT	Protein ABHD17A OS=Rattus norvegicus GN=Abhd17a PE=2 SV=1	157	5e-46	COG1073	Fermentation-respiration switch protein FrsA, has esterase activity, DUF1100 family	T	Signal transduction mechanisms	K06889|1|1e-13|72.0|pda:103705783| uncharacterized protein	-	-	-
257	XP_002290373.1	predicted protein, partial [Thalassiosira pseudonana CCMP1335]	14005.2	0.088	1	1	0.58	0.139	0.01856	XP_002290373.1	NATEKKLYWDRSHYDSPESQIRALAHSSTVYVGNLAFSTRTIHLRRHFEQLGPVADVQVGLDRFKKTPCGFAFVEFRHRIDALSAVANLTGTKLDGRVIRVELDAGFKPGRQYGRGASGGQVRDD	100	4e-89	gi|224001402|ref|XP_002290373.1|	predicted protein [Thalassiosira pseudonana CCMP1335]	49.6	1e-35	sp|B4NB54|NCBP2_DROWI	Nuclear cap-binding protein subunit 2 OS=Drosophila willistoni GN=Cbp20 PE=3 SV=1	63.2	2e-12	COG0724	RNA recognition motif (RRM) domain	J	Translation, ribosomal structure and biogenesis	K12883|1|2e-33|120|ccp:CHC_T00010116001| nuclear cap-binding protein subunit 2		GO:0003676//nucleic acid binding;GO:0000166//nucleotide binding	-
258	EJK54004.1	hypothetical protein THAOC_26452 [Thalassiosira oceanica]	45459.7	0.026	1	1	0.75	0.075	0.01001	EJK54004.1	MLSAVVVRERDAEGGRGLRGLVDPGHGPGGTEADATEPSGPRQEMEDLVMVVSQVDVRYPSRARSSLPVDADLMGDKMPLGLRNPNNVTKKFPVVNGQDGSTVVMEPGGLHRWRIVNTVMDGYLRLHVRHANGEDRGDGKDSVEAPCRIAEVAADGVPYRSKRVFGRGKQVVIPPGSRRDLLVQCAADAEVHSGPSSRASEDDVEKFMGNDTAVATGLLFNVNVEGKDNGEIDPTGTLFDLFDSYESRPTASGLAYPPEPMADLRNATVLEENRRTIRYTQAGPSTPREHRADGNVHPFLGFDGKLFAKHEPLVVPRDKVVELTVVNDICMDGTPAYESHPIHIHTNHFQVVGVSSPLGTGYSTDFQLGDWRDTVAVPAPGSVTLRFVARDFGGDTLLH…	100	0	gi|397587698|gb|EJK54004.1|	hypothetical protein THAOC_26452 [Thalassiosira oceanica]	39.81	2e-07	sp|Q10ND7|LAC10_ORYSJ	Laccase-10 OS=Oryza sativa subsp. japonica GN=LAC10 PE=2 SV=1	83.6	1e-15	COG2132	Multicopper oxidase with three cupredoxin domains (includes cell division protein FtsP and spore coat protein CotA)	DPM	Cell cycle control, cell division, chromosome partitioning;Inorganic ion transport and metabolism;Cell wall/membrane/envelope biogenesis	K05909|1|6e-08|58.5|bdi:100835303| laccase [EC:1.10.3.2]	-	-	-
259	XP_002286195.1	predicted protein [Thalassiosira pseudonana CCMP1335]	33655.1	0.029	1	3	0.82	0.053	0.009347	XP_002286195.1	MKHSLSLTTLLQLSSSLLFATAFTPLSGVTVQSVKSSQDVDLSIFLTTPSSSNAEQNKTMLIFGTYAADFNAIEYAQRLRYYTPELQKKGVGKIGIIFNCEDESAKKLVDLVDMPCDVSSSEANDSVMLMVDPLGKAGRLFGVGSGWRPDDGEMSPYVKLFGMLFGLGAWATLPAVIGGYIGNPFTPQPWIEDAMAVGITKGRWPDNALVLDEEGEVITNKFTELPVVGTWERRPLELATLRLQNMLDISIKNWKELAPKDAALEAGVLTQLGGCIVFDTAKGEPVFEWKDPGVCAVANFEDILEKL	100	0	gi|223993023|ref|XP_002286195.1|	predicted protein [Thalassiosira pseudonana CCMP1335]	-	-	-	-	-	-	-	-	-	-	-	-	-	-
260	EJK70670.1	hypothetical protein THAOC_07951 [Thalassiosira oceanica]	27019.9	0.043	2	2	0.73	0.086	0.01228	EJK70670.1	MSLKIPAGQTAALIGSSGSGKRFYDPVAAVVDRGENNGSDQIEIVIGDKPPNLDDSNGVVLVDGIDIRTMDVKYLRSQIALVGQEPVLFDASVSENIAFGKPGATEEEIISAAKVANAHEFISKFEGGYDYNVGTRGKKVSGGQKQRIAIARAVIKDHRILLLDEATSALDNESEKIVQRSLDNLIAGEKSAERTTVIIAHRLSTVRNADCIYVLENSGDGAVVVESGSHDELIALNGKYKALLNATMKSDDD	100	0	gi|397632716|gb|EJK70670.1|	hypothetical protein THAOC_07951 [Thalassiosira oceanica]	48.85	1e-69	sp|Q9LSJ6|AB17B_ARATH	ABC transporter B family member 17 OS=Arabidopsis thaliana GN=ABCB17 PE=3 SV=1	214	6e-64	COG1132	ABC-type multidrug transport system, ATPase and permease component	V	Defense mechanisms	K05658|1|3e-70|237|ota:Ot01g04530| ATP-binding cassette, subfamily B (MDR/TAP), member 1 [EC:3.6.3.44]		GO:0017111//nucleoside-triphosphatase activity	-
261	YP_009093505.1	ribosomal protein S19 (chloroplast) [Thalassiosira weissflogii]	10420.7	0.174	2	3	0.43	0.162	0.01824	YP_009093505.1	MSRSLKKGPFVAYHLLKKINKMNAEGKKDIITTWSRSSTILPNMVGFTIAVYNGKQHVPIFISDQLVGHKLGEFVSTRTFKSHIKADKKTKR	100	1e-62	gi|700082707|ref|YP_009093505.1|	ribosomal protein S19 (chloroplast) [Thalassiosira weissflogii]	95.65	3e-62	sp|A0T0X6|RR19_THAPS	30S ribosomal protein S19, chloroplastic OS=Thalassiosira pseudonana GN=rps19 PE=3 SV=1	147	3e-46	COG0185	Ribosomal protein S19	J	Translation, ribosomal structure and biogenesis	K02965|1|1e-44|142|cre:ChreCp013| small subunit ribosomal protein S19	GO:0006412//translation	GO:0003735//structural constituent of ribosome;GO:0019843//rRNA binding	GO:0015935//small ribosomal subunit;GO:0009507//chloroplast;GO:0005739//mitochondrion
262	XP_002293459.1	multispanning membrane protein [Thalassiosira pseudonana CCMP1335]	73289.3	0.037	1	1	0.74	0.104	0.02154	XP_002293459.1	MMKALLASLLLQGAHGFYLPGVNPYSFTEGEVVKLKVNKMTSQKTLLPVDYYRLPFCQPPGGPKMDHENLGEFLAGDRIESSPYRLNFKVDMYCEQVCITNLGRGEQQGVSPNKMVRAIRKNYHNNWIVDNIPAASKVEDDNTVTTRYWQGFPVGFIASDTKKAHVHNHVNIEVEYHAVETDPTKARIVRFTVEPFSIKHDFEATDIQNPIESCNTKSANRAHTKYEMIYAHGRAPQEASGRVLFTYDVIWTENANLHWASRWDVYLSMDNAIPAKVHWLSIANSLVIVIVLSAMIAAILVRNLRRDFSRYNRLATDEEKQEDLEEFGWKLVHADVFRPPSFSPLLLAVACGTGAQLLCMTILTILFSAMGFLSPANRGALIMAQLLLYVLMGTVAGYV…	100	0	gi|224009001|ref|XP_002293459.1|	multispanning membrane protein [Thalassiosira pseudonana CCMP1335]	47.42	0	sp|Q9LIC2|TMN7_ARATH	Transmembrane 9 superfamily member 7 OS=Arabidopsis thaliana GN=TMN7 PE=2 SV=1	-	-	-	-	-	-	K17086|1|0.0|577|atr:18448202| transmembrane 9 superfamily member 2/4		GO:0009976//tocopherol cyclase activity	GO:0044464//cell part;GO:0016021//integral component of membrane
263	EJK46463.1	hypothetical protein THAOC_34869 [Thalassiosira oceanica]	56410.3	0.031	1	3	0.73	0.055	0.003654	EJK46463.1	MILLLLLCALATFAAAEEAAIRVFPQRTSTEAAVVEWGHSAIINALDGVVATFGPQTSDGATFEVETTPILAKPIDGLGTKQRSNDEDEYPGKLDNADEVDGNMVIMTDVAGFSGVTMARIAKESGAAALMVVNTDKEGDGDFIYSLEPENEEEERYAEEHIDIPVIMVSLQAGNIITTALATDDMDPAIVNSGGALPERVRLYAGGDRPFFEDAVSKSPVVYLIHNLLSDEECEALLKSAEKKYERIDDTSGTSNYLESSMASEKQGVPTAIDVDQTMLWKGSVGGKTFKDIDERISQVTGFPPEHFSDFQINKYVKGSLYGPHYDMNPANGIMATITVFLNDVPIEHGGEFVYPKTQNESGADGGDAVVIRPTKGLAVVHHNTDDRYNFDQSSVNQE…	100	0	gi|397568977|gb|EJK46463.1|	hypothetical protein THAOC_34869 [Thalassiosira oceanica]	28.7	4e-14	sp|F4JZ24|P4H10_ARATH	Probable prolyl 4-hydroxylase 10 OS=Arabidopsis thaliana GN=P4H10 PE=3 SV=1	68.9	4e-11	COG3751	Proline 4-hydroxylase (includes Rps23 Pro-64 3,4-dihydroxylase Tpa1), contains SM-20 domain	JO	Translation, ribosomal structure and biogenesis;Posttranslational modification, protein turnover, chaperones	K00472|1|4e-17|85.9|nnu:104603673| prolyl 4-hydroxylase [EC:1.14.11.2]	GO:0055114//oxidation-reduction process	GO:0016705//oxidoreductase activity, acting on paired donors, with incorporation or reduction of molecular oxygen;GO:0031418//L-ascorbic acid binding;GO:0005506//iron ion binding	-
264	EJK75236.1	hypothetical protein THAOC_03046 [Thalassiosira oceanica]	14827.5	0.058	2	2	0.5	0.107	0.007167	EJK75236.1	MAKYTLFLLAAIVALSQAFVPASQTSRVNQVSAAPRIETQSPTQLFAEDMTWEGEYPPSKVLGPIMSKAPSGTLAILSMMCLAACAYSCVQSGILLRVPGAVESGEWVKPEYILGGMAGPFAWGFHVASWIQRKNGM	100	4e-97	gi|397642442|gb|EJK75236.1|	hypothetical protein THAOC_03046 [Thalassiosira oceanica]	-	-	-	-	-	-	-	-	-	-	-	-	-	-
265	XP_002291727.1	predicted protein [Thalassiosira pseudonana CCMP1335]	59467.6	0.047	1	3	0.75	0.066	0.00729	XP_002291727.1	MFSLVNLIVIQRKWTFNWTCTLFFPSPPNHTSQAPSTSLHRRRPHLIHQPHNTMTDPPPSKKRVSIAEPAASSNGTNGGRSIAPRRSMGPKQMSLKAFTPDNYSDDEDDKFFHDEDVVSGNTTGINEPGKGWTNGAITPQFTLHPYTRSGRLQLYSHHRRWINFQSSWSRIGAGSTELDAVHSESSSGKSVMTGCLLDEARTVRALVAQLCECFYKQGWATGTGGGVSIRVGGPKENRPYRVFVAPSGVQKEDMVGDDVFELDMDRNVVQPPKTPNLRQSACTPLWYVVYKHVPSAMCVIHTHSMYAQLATLLDPTEQSSVLRVTHLEMLKGVGNHSYDSILEIPIIDNRPSEDLLANQLEQVILKYPMCNAVLVRRHGVYAWGDSWEQAKAQCESFDY…	100	0	gi|224005533|ref|XP_002291727.1|	predicted protein [Thalassiosira pseudonana CCMP1335]	46.19	1e-50	sp|C1C4M8|MTNB_LITCT	Methylthioribulose-1-phosphate dehydratase OS=Lithobates catesbeiana GN=apip PE=2 SV=1	185	1e-53	COG0235	Ribulose-5-phosphate 4-epimerase/Fuculose-1-phosphate aldolase	G	Carbohydrate transport and metabolism	K16054|1|2e-51|186|csl:COCSUDRAFT_27259| methylthioribulose 1-phosphate dehydratase / enolase-phosphatase E1 [EC:4.2.1.109 3.1.3.77]	GO:0071267//L-methionine salvage	GO:0046872//metal ion binding;GO:0016791//phosphatase activity	GO:0005737//cytoplasm
266	XP_002292953.1	protein 23 of the large ribosomal subunit [Thalassiosira pseudonana CCMP1335]	15392.3	0.131	1	2	0.75	0.135	0.0466	XP_002292953.1	MGEKNLGPRGRAAASGIKHRVAAGLPVAAVINCADNSGAKNLHIIAVCNIGGRLNRLPKAGSGDMVMASIKKGKPELRKKVMPAIIVRQRKSFRRKEGVFIHFEDSAGVIVNNKGEMKGSAVSGPVAKECAELWPRIASNAGSIV	100	2e-99	gi|224007988|ref|XP_002292953.1|	protein 23 of the large ribosomal subunit [Thalassiosira pseudonana CCMP1335]	75.54	3e-75	sp|Q6PC14|RL23_DANRE	60S ribosomal protein L23 OS=Danio rerio GN=rpl23 PE=2 SV=1	144	1e-43	COG0093	Ribosomal protein L14	J	Translation, ribosomal structure and biogenesis	K02894|1|4e-73|218|ccp:CHC_T00001050001| large subunit ribosomal protein L23e	GO:0006412//translation	GO:0003735//structural constituent of ribosome;GO:0019843//rRNA binding;GO:0016758//transferase activity, transferring hexosyl groups;GO:0000166//nucleotide binding	GO:0005730//nucleolus;GO:0022625//cytosolic large ribosomal subunit;GO:0009507//chloroplast
267	EED88241.1	ABC-transporter like protein, partial [Thalassiosira pseudonana CCMP1335]	57223.4	0.022	6	39	0.73	0.109	0.02225	EED88241.1	LHQTKLRLRRGHRYALVGQNGVGKTTLMNAINNGKLEGWPVDLLTEYVDSGSNVDPVHEAKIVFTHLMSSTGKSEEDCRGILKDQLKFTEEMMMGTIGELSGGWQMKLRLAKAVLVSSDILLLDEPTNHLDSKTILWLEDYLTSLTQTTVLIVSHDTQFLEHVCSDIIHYEQRPQWGPHRKLVHYAGTMSAFVKKQPQAKHYFELATTDLKFVFPDPGRLEGIRTSTQRFLEMEGVNFRYPGAEADTLANIDLKMTLSSRVVLIGANGAGKTTLVKMIVGDTQPSNPQECRFFIHHNLRIAYVSQHAFYHVEQHIEDSPVAYIQWRFKDGFDKEKIESEAYRIPPEEQAAIEAYNLEGIWSRRLRAGVLEYEIKKKNVREKDNIYVSKDELLSMGFKHL…	100	0	gi|224010900|ref|XP_002294407.1|	ABC-transporter like protein [Thalassiosira pseudonana CCMP1335]	45.02	6e-144	sp|O14134|ELF1_SCHPO	mRNA export factor elf1 OS=Schizosaccharomyces pombe (strain 972 / ATCC 24843) GN=elf1 PE=1 SV=1	142	2e-34	COG0488	ATPase components of ABC transporters with duplicated ATPase domains	R	General function prediction only	K03235|1|3e-158|480|csl:COCSUDRAFT_47721| elongation factor 3	GO:0006200//ATP catabolic process	GO:0005524//ATP binding;GO:0016887//ATPase activity	-
268	EJK60528.1	hypothetical protein THAOC_19091 [Thalassiosira oceanica]	12896	0.387	2	4	0.52	0.095	0.005324	EJK60528.1	MAKTPSKKAPSKAAKKAASGDKKRSKKRVESYSTYIYKVLKQVHPDTGISKKGMSIMNSFINDIFERIAGEAGKLATYNKKATLSSREIQTAVRLMLPGELAKHAVSEGTKAVTKFSSA	100	3e-62	gi|397640826|gb|EJK74337.1|	hypothetical protein THAOC_03988 [Thalassiosira oceanica]	89.01	1e-56	sp|P82887|H2B_OLILU	Histone H2B OS=Olisthodiscus luteus PE=1 SV=2	-	-	-	-	-	-	K11252|1|9e-52|162|cme:CYME_CMN145C| histone H2B	GO:0006334//nucleosome assembly	GO:0003677//DNA binding	GO:0000786//nucleosome;GO:0005634//nucleus
269	sp|A0T0X8.1|RK22_THAPS	RecName: Full=50S ribosomal protein L22, chloroplastic	13017.1	0.174	1	1	0.72	0.126	0.03058	sp|A0T0X8.1|RK22_THAPS	MSNGQSVKAVAKYVRISPHKVRQVLDQIRGRSYQEALMILEFLPYDAGSPIWQVVHSVAANAKNNYNLDKKKLVISEIFADEGPKLKRIRPRAQGRAYKILKPTCHITVVVKSIS	100	1e-80	gi|118411196|ref|YP_874590.1|	50S ribosomal protein L22 [Thalassiosira pseudonana]	100	2e-81	sp|A0T0X8|RK22_THAPS	50S ribosomal protein L22, chloroplastic OS=Thalassiosira pseudonana GN=rpl22 PE=3 SV=1	163	1e-51	COG0091	Ribosomal protein L22	J	Translation, ribosomal structure and biogenesis	K02890|1|1e-37|126|ppp:PhpapaCp068| large subunit ribosomal protein L22	GO:0006412//translation	GO:0003735//structural constituent of ribosome;GO:0019843//rRNA binding	GO:0015934//large ribosomal subunit;GO:0009507//chloroplast
270	sp|A0T0X2.1|RK3_THAPS	RecName: Full=50S ribosomal protein L3, chloroplastic	22036.9	0.304	3	10	0.4	0.118	0.007786	sp|A0T0X2.1|RK3_THAPS	MSLGLLGNKIGMTQIFDESGNIIPVTILKVGPCVITQVKTTLNDGYNAIQVGYGNVSTKALTQPQLGHLQKSNIQPLKYLKEFHVSDPTEFNVGQILNVESFVAGQLINVTGKSIGKGFSGLQKRYNFARGPMTHGSKNHRAPGSIGMGTSPGRVLPGKKMAGQLGNKTANIKKLKIVQVNNDENILVVKGAVPGKPGNLLSIIPSK	100	7e-147	gi|118411190|ref|YP_874584.1|	50S ribosomal protein L3 [Thalassiosira pseudonana]	100	1e-147	sp|A0T0X2|RK3_THAPS	50S ribosomal protein L3, chloroplastic OS=Thalassiosira pseudonana GN=rpl3 PE=3 SV=1	276	2e-93	COG0087	Ribosomal protein L3	J	Translation, ribosomal structure and biogenesis	K02906|1|2e-71|221|sind:105168351| large subunit ribosomal protein L3	GO:0006412//translation	GO:0003735//structural constituent of ribosome;GO:0019843//rRNA binding	GO:0005840//ribosome;GO:0009507//chloroplast
271	XP_002286821.1	HSP90 domain-containing protein [Thalassiosira pseudonana CCMP1335]	84196.8	0.024	1	1	0.85	0.068	0.02498	XP_002286821.1	MVQLQLATAASRAALSHHARKASSRLVNSARQYHGQSRSLSFISLSNTTCARHHRRPSARQQLQIPATFQASPLSTSADSSTEDTKEQLEFQAETRQLLDIVTHSLYTDKEVFLRELVSNASDALEKLRHLQASGTLSSSDDTPLEIRITTDEAANTLTITDTGIGMSREEMMSNLGTIARSGSKAFVKEMQMQSQLDADKVTDPFGNGIIGKFGVGFYSGFMVSDKVDVRSKSAGKIGENSSGSDDEDALVWESTGTGSYSISPLSEDIRQDRGTSVVLHLRPELSQYSNESTIETILKKYSNFVGFPIFLNGKRVNTIDAIWLHDPKEVDDEKHSAFYKYISHMYDEPLSKLHFRMDAPIDIKALFYIPSFHQEKYGMGRMDPGVSLYSRKILIEAK…	100	0	gi|223994275|ref|XP_002286821.1|	HSP90 domain-containing protein [Thalassiosira pseudonana CCMP1335]	43.81	0	sp|Q86L04|TRAP1_DICDI	TNF receptor-associated protein 1 homolog, mitochondrial OS=Dictyostelium discoideum GN=trap1 PE=2 SV=1	553	0	COG0326	Molecular chaperone, HSP90 family	O	Posttranslational modification, protein turnover, chaperones	K09488|1|1e-160|484|olu:OSTLU_26010| TNF receptor-associated protein 1	GO:0006457//protein folding;GO:0006950//response to stress	GO:0051082//unfolded protein binding;GO:0005524//ATP binding	GO:0005737//cytoplasm
272	EJK75980.1	hypothetical protein THAOC_02278, partial [Thalassiosira oceanica]	74763.8	0.013	1	2	1.21	0.4	0.4321	EJK75980.1	RKSITSGTIDSEEHASAERSSRRTQSRFRTSAPASVLRYFGVECRDRNLLAAMYPKQAMTMFLLSVVASARREDDAYRIKDASSSSRIIGGQRVRGVWLLRREIGFGRVSHLAPPLAKTEEDRFPYVVSLNDFSHFCAGSLIANDFVLTAAHCLGGSYSVRIGTDRSSNRGVNVEMLREYEHPDYNDRNDDNDIALVKLSEPAGRGMPLVRMNPNEDVPFVGTWAHVMGWGDQNPDEDITRLAKNLMGVDIQVISNSQCERSSRGEDSYRGWIYDSMLCTMTQGQDACQGDSGGPLIIKGDSPEEDVQIGVVSWGIGCAYLPGVFSRTSSAYDWIRTVVCEDSAEPPMSLCDTERMPSTAPSSSSSPSGMPSLSTEPSMAPTGGPSSEPSGSPSVAPSV…	100	0	gi|397643614|gb|EJK75980.1|	hypothetical protein THAOC_02278, partial [Thalassiosira oceanica]	36.07	2e-34	sp|P07478|TRY2_HUMAN	Trypsin-2 OS=Homo sapiens GN=PRSS2 PE=1 SV=1	138	5e-35	COG5640	Secreted trypsin-like serine protease	O	Posttranslational modification, protein turnover, chaperones	K09539|1|3e-25|104|vcn:VOLCADRAFT_85472| DnaJ homolog subfamily C member 19		GO:0008233//peptidase activity	-
273	XP_002296774.1	predicted protein, partial [Thalassiosira pseudonana CCMP1335]	14117.6	0.244	1	1	0.61	0.149	0.02408	XP_002296774.1	VRTKTVKKSARTIVEKYYPRLTLDFHTNKRIIDEIAITPSKRMRNKIAGFTTHLMKRIAKGPVRNISLKLQEEERERRLDFVPEVSALEQETIAIDRETRDLLESMGYGSLNGVVVSNSADRS	100	3e-79	gi|224014222|ref|XP_002296774.1|	predicted protein [Thalassiosira pseudonana CCMP1335]	65.55	3e-49	sp|Q9P7J6|RS17B_SCHPO	40S ribosomal protein S17-B OS=Schizosaccharomyces pombe (strain 972 / ATCC 24843) GN=rps1702 PE=1 SV=1	61.6	3e-12	COG1383	Ribosomal protein S17E	J	Translation, ribosomal structure and biogenesis	K02962|1|7e-54|168|olu:OSTLU_31424| small subunit ribosomal protein S17e	GO:0006412//translation	GO:0003735//structural constituent of ribosome	GO:0005840//ribosome
274	EJK65910.1	hypothetical protein THAOC_13191 [Thalassiosira oceanica]	19965.7	0.059	1	2	0.62	0.194	0.04683	EJK65910.1	MSDSSTAQASPLLYFVAGLLCASIASHLLARPSPKRDGNAMIGEDEDWDSDDDGPAEANCPSSAWGISDAPYKMVLCVNTSLSMGKGKIAAQCGHAAVGCYKRAKRHCQAGLSAWERTGCAKIAVKCPSEDEMDEIAAKALSRGIPIYLVEDAGRTQIAAGSRTVLGLGPAPVREFDGVSNHLKLM	100	2e-125	gi|397620789|gb|EJK65910.1|	hypothetical protein THAOC_13191 [Thalassiosira oceanica]	52.63	5e-36	sp|Q8R2Y8|PTH2_MOUSE	Peptidyl-tRNA hydrolase 2, mitochondrial OS=Mus musculus GN=Ptrh2 PE=1 SV=1	96.7	1e-24	COG1990	Peptidyl-tRNA hydrolase	J	Translation, ribosomal structure and biogenesis	K04794|1|9e-37|126|vcn:VOLCADRAFT_77907|		GO:0004045//aminoacyl-tRNA hydrolase activity	-
275	XP_002288169.1	predicted protein [Thalassiosira pseudonana CCMP1335]	51334.3	0.018	1	1	0.7	0.065	0.004561	XP_002288169.1	MFVYGRLSSFRKLGLNEHMIRMYKSTFSSSFATESSSFSTASIHPNTTANILAVRAAEDARDAFFDSLPRTLLQSQNEADVPAPFKREEIVLGSFLGSGEFSNVYEIEAFCTKGDVMNEDETRQRESMALRNKYALTGKARYALKHIKVDYQHQGSHSEALYIQATRDIAREAEILASLNHPHVIKLRGVTSSGAAGFFNGADGYFLIIDRLFGTLDQRIKLWYERKKSQRSLFLFPSRSRKSVADDKNRQLEERLAIALQIASAMKYLHSHRILYRDLKPTNIGFDGRGDVKIFDFGLARVLPQSQDQDANMDTFKMSGAGTPRYMAPEVLISGQPYNVKVDVYSFSIVFWEMLEAKIPFGFVKRKSQLVDYVVKKKGRPVIDHNLPPSIQTILRTGF…	100	0	gi|223996992|ref|XP_002288169.1|	predicted protein [Thalassiosira pseudonana CCMP1335]	40.13	2e-24	sp|O22558|STY8_ARATH	Serine/threonine-protein kinase STY8 OS=Arabidopsis thaliana GN=STY8 PE=1 SV=2	107	4e-23	COG2319	WD40 repeat	R	General function prediction only	K14510|1|2e-22|104|lja:Lj1g3v4695530.1| serine/threonine-protein kinase CTR1 [EC:2.7.11.1]!K17535|3|7e-22|102|mdm:103444978| serine/threonine-protein kinase TNNI3K [EC:2.7.11.1]	GO:0006468//protein phosphorylation	GO:0004672//protein kinase activity;GO:0005524//ATP binding	-
276	YP_009093141.1	ribulose-1,5-bisphosphate carboxylase/oxygenase small subunit (chloroplast) [Roundia cardiophora]	16028.6	0.554	1	2	0.75	0.073	0.009794	YP_009093141.1	MRLTQGCFSFLPDLTDQQIEKQVAYAMSKGWAMNVEWTDDPHPRNNYWELWGLPLFDIKDPATVMFELNEARKSCAAGYIRVNAFDASYGIESCVMSFITNRPSNEPGFYLDRTDGAGRQIVYSIKSYSVQSNPEGSRY	100	5e-103	gi|700658136|ref|YP_009093141.1|	ribulose-1,5-bisphosphate carboxylase/oxygenase small subunit (chloroplast) [Roundia cardiophora]	91.37	5e-98	sp|O98948|RBS_THANO	Ribulose bisphosphate carboxylase small chain OS=Thalassiosira nordenskioeldii GN=rbcS PE=3 SV=1	196	6e-64	COG4451	Ribulose bisphosphate carboxylase small subunit	G	Carbohydrate transport and metabolism	K01602|1|4e-63|192|ccp:CHC_955| ribulose-bisphosphate carboxylase small chain [EC:4.1.1.39]	GO:0019253//reductive pentose-phosphate cycle;GO:0009853//photorespiration;GO:0055114//oxidation-reduction process	GO:0016984//ribulose-bisphosphate carboxylase activity;GO:0004497//monooxygenase activity	GO:0009507//chloroplast
277	YP_009093518.1	ribosomal protein S5 (chloroplast) [Thalassiosira weissflogii]	18935.6	0.051	1	2	0.5	0.137	0.0136	YP_009093518.1	MSTELKQVNKIKKTPRRNENINDIKFIERLIKISRVTKVTKGGKKLSFRAVVVIGDENGQVGVGVGKAEDVVNAFKKAKTDGRKNLINIPLTKYLSIPHGVIGDVGACKIVMRPSIEGSGVIAGGAVRTVLEVAGIKNVIAKQLGSDNLLNNARAAIVALESLTTKSEVLQKRDLN	100	4e-121	gi|700082720|ref|YP_009093518.1|	ribosomal protein S5 (chloroplast) [Thalassiosira weissflogii]	87.86	1e-105	sp|A0T0Y9|RR5_THAPS	30S ribosomal protein S5, chloroplastic OS=Thalassiosira pseudonana GN=rps5 PE=3 SV=1	197	2e-63	COG0098	Ribosomal protein S5	J	Translation, ribosomal structure and biogenesis	K02988|1|1e-58|188|sly:101255358| small subunit ribosomal protein S5	GO:0006412//translation	GO:0003735//structural constituent of ribosome;GO:0019843//rRNA binding	GO:0015935//small ribosomal subunit;GO:0009507//chloroplast
278	EJK73018.1	hypothetical protein THAOC_05388 [Thalassiosira oceanica]	18478	0.048	1	1	0.8	0.1	0.03437	EJK73018.1	MFDITTCFGCCGKKDGVYFLLIKGEYCFVFASEDAASPKYAIELINRRAVVDTHESYIPRIPHPGASNDTTYTSINLETSLGDIEYKFTFANMDDRASTRFCNAIAAASSEAASELTRKRLGHANLLDKRGSVRYANQVGEKKKKDQPEAPVTAGEVMAGMPAAAGY	100	4e-112	gi|397638332|gb|EJK73018.1|	hypothetical protein THAOC_05388 [Thalassiosira oceanica]	-	-	-	-	-	-	-	-	-	-	-	-	-	-
279	EJK54785.1	ferredoxin [Thalassiosira oceanica]	13782.2	0.08	2	3	1.19	0.349	0.3568	EJK54785.1	MKLAIIAACVASAAAFAPMAPVRQATSLDYSVKVFNEEEGIDATFECADDVFIVDAAEEEGVDLPYSCRAGACSTCTGKVISGEVDQSEQTFLDDDQMADGYVLTCVAYPKSDCEIQVHMEDDLF	100	2e-67	gi|397589752|gb|EJK54785.1|	ferredoxin [Thalassiosira oceanica]	68.75	5e-47	sp|P13106|FER_BUMFI	Ferredoxin OS=Bumilleriopsis filiformis PE=1 SV=1	144	2e-44	COG0633	Ferredoxin	C	Energy production and conversion	K02639|1|5e-44|142|cme:CymeCp166| ferredoxin	GO:0022900//electron transport chain	GO:0046872//metal ion binding;GO:0009055//electron carrier activity;GO:0051537//2 iron, 2 sulfur cluster binding	GO:0009507//chloroplast
280	EED94804.1	hypothetical protein THAPSDRAFT_32022, partial [Thalassiosira pseudonana CCMP1335]	33178.2	0.182	1	1	0.6	0.15	0.02391	EED94804.1	INIVPQGKRMVVERFGKLHAIHESGFFIAVPIVDRIAYVIDVRERAVDIAPQSAITRDNVSVEVSGNLFVRVVDPERAAYGARNPLYAVMMHAQSAMRSAIGELELDEILHNRAGLNTLIKGSLQEAAVAWGLEVRRYELTEITPDDQIRIAMDKQAAAERDRREQVLRAEGDKRRAELTSEGIKISLKNESEGKLIQVTNEAEAEKLRILREAEGRAEAMRVLALAQAEAIEKIAEQLSKAGGEQAAALALAKDYVKMYGEMGSKSNTMFFQERAGDAQSLVVQAMAAMKAMNASGDDAKQ	100	0	gi|223995355|ref|XP_002287361.1|	hypothetical protein THAPSDRAFT_32022 [Thalassiosira pseudonana CCMP1335]	34.8	1e-50	sp|O60121|YH77_SCHPO	Uncharacterized protein C16G5.07c OS=Schizosaccharomyces pombe (strain 972 / ATCC 24843) GN=SPBC16G5.07c PE=3 SV=1	216	6e-67	COG0330	Regulator of protease activity HflC, stomatin/prohibitin superfamily	O	Posttranslational modification, protein turnover, chaperones	-			GO:0016020//membrane;GO:0005739//mitochondrion
281	EED87957.1	hypothetical protein THAPSDRAFT_25629 [Thalassiosira pseudonana CCMP1335]	86714	0.108	2	11	0.65	0.158	0.0349	EED87957.1	MVSRGLSGAVASLLLLAGTSAFVPAKFQNNGVRSLNTNSANNKVESCESMMKRMDGTSLVILRDIAVAQDVDLDKASSSPDRKVKLPLYRNIGIMAHIDAGKTTTTERILYYTGKSYKIGEVHEGGATMDWMEQEKERGITITSAATTCEWNNHRINIIDTPGHVDFTLEVERSLRVLDGAVAVFDGVAGVEPQTETVWRQADKYKVPRMCFLNKMDRTGANFYFCVDTIVELLGATPAVLQIPIGSEGDFLGVIDLVTMEAIVWKGEDLGASFEKIPLDECNDEPLVDDALKAKAKEWREKLVELAVEQDEDALMEYLEGVEPDVPTMKKLIRKGCLNLSFVPVVTGTAFKNKGVQPLLDAVVDYLPSPVEVEAIKGVKEDSDEGIVRLSSDAEPFSA…	100	0	gi|224011888|ref|XP_002294597.1|	hypothetical protein THAPSDRAFT_25629 [Thalassiosira pseudonana CCMP1335]	67.9	0	sp|A7HWQ8|EFG_PARL1	Elongation factor G OS=Parvibaculum lavamentivorans (strain DS-1 / DSM 13023 / NCIMB 13966) GN=fusA PE=3 SV=1	978	0	COG0480	Translation elongation factor EF-G, a GTPase	J	Translation, ribosomal structure and biogenesis	K02355|1|0.0|959|mpp:MICPUCDRAFT_26499| elongation factor G	GO:0006414//translational elongation;GO:0006184//GTP catabolic process;GO:0009791//post-embryonic development	GO:0003746//translation elongation factor activity;GO:0003924//GTPase activity;GO:0005525//GTP binding	GO:0044434//chloroplast part
282	EJK46660.1	hypothetical protein THAOC_34663 [Thalassiosira oceanica]	24629.1	0.057	1	1	0.54	0.073	0.002792	EJK46660.1	MRTERKTREEEEDKEDKRHGYSQEHIGIHSISYRGIRGKWHFCPSYVLQERINVPRQQRTFKASKRLAERDNTIIDMLNSAGHEDVSFCVCDHEKPDCPIIFASDGFCKLTGYGHTEIEGRNCRFLQGSETRKEDVDRIRSAIKSQTEASVNLLNYKKDGTAFNNQFFLAPLRDADERTAYYIGVQCSVKRLGPGQAPENMGWVYAQGIHA	100	2e-146	gi|397569305|gb|EJK46660.1|	hypothetical protein THAOC_34663 [Thalassiosira oceanica]	48.78	7e-29	sp|Q9ST27|PHOT2_ORYSJ	Phototropin-2 OS=Oryza sativa subsp. japonica GN=PHOT2 PE=1 SV=1	107	2e-25	COG4251	Bacteriophytochrome (light-regulated signal transduction histidine kinase)	T	Signal transduction mechanisms	K20715|1|7e-33|128|cre:CHLREDRAFT_183965| phototropin [EC:2.7.11.1]	GO:0016310//phosphorylation;GO:0007165//signal transduction	GO:0004672//protein kinase activity;GO:0097159//organic cyclic compound binding;GO:1901363//heterocyclic compound binding	-
283	ADB27506.1	photosystem I assembly protein Ycf4 (chloroplast) [Thalassiosira oceanica CCMP1005]	20536.1	0.144	1	4	0.74	0.11	0.02573	ADB27506.1	MQNQIRQDKIVGSRRFSNYFWAILLLIGGLAFLLAGVSSYLKIKLLPFVNTTELVFIPQGIVMMFYGTLSFGLSLYISATLFWDIGSGYNEYNKIESLVKVVRKGFPGKNREILLTYPLNNIQSIGIKISEGLNPQRIIYLCLKDERKIPLTPVQQPDSISDLEDEAADLAKFLDLKLENL	100	3e-100	gi|315320496|ref|YP_004072552.1|	photosystem I assembly protein Ycf4 [Thalassiosira oceanica CCMP1005]	91.3	3e-95	sp|A0T0U3|YCF4_THAPS	Photosystem I assembly protein Ycf4 OS=Thalassiosira pseudonana GN=ycf4 PE=3 SV=1	-	-	-	-	-	-	K01963|1|1e-19|89.0|mtr:MTR_4g034770| acetyl-CoA carboxylase carboxyl transferase subunit beta [EC:6.4.1.2]	GO:0015979//photosynthesis		GO:0016021//integral component of membrane;GO:0009522//photosystem I;GO:0009535//chloroplast thylakoid membrane
284	EJK47796.1	hypothetical protein THAOC_33466 [Thalassiosira oceanica]	52299.5	0.087	3	10	0.52	0.212	0.04627	EJK47796.1	MATAIADGMPGLSCRSDDTVREVLRGCRDHLSHYVKGLAGGSQEQAQLGLGHSYSRGRVKFNPARSDNMIIQSIALLDQMDKDLNTFAMRVREWYSWHFPELKDHVKDNYMYARCAAFIRDKRSLCSGGDTAENGESDNGKVNGEGVESPEEKLAGLVEIIGDEEVAKAVVVAARTSMGMDCSSMDMVNIVNFTQRMVKLAEYRKQLASYLTDKMAVVAPNLSTLIGDTVAARLISKAGSLTNLAKAPASTVQILGAEKALFRALKTKGNTPKYGLIYHSSFIGRADAKNKGRISRYLANKCSIATRIDSFADEPTSVYGQKLRDQVEERLKFYETGAAPRKNIDVMEEVARHLKAGDDAEAEADEISKKKKKKKDKKTPSKKRKAEDEGADEEEDAKA…	100	0	gi|397571429|gb|EJK47796.1|	hypothetical protein THAOC_33466 [Thalassiosira oceanica]	61.06	8e-138	sp|O00567|NOP56_HUMAN	Nucleolar protein 56 OS=Homo sapiens GN=NOP56 PE=1 SV=4	180	5e-50	COG1498	RNA processing factor Prp31, contains Nop domain	J	Translation, ribosomal structure and biogenesis	K14564|1|3e-145|427|olu:OSTLU_50302| nucleolar protein 56	-	-	-
285	XP_002292930.1	clathrin heavy chain [Thalassiosira pseudonana CCMP1335]	194217	0.13	1	1	0.82	0.037	0.003129	XP_002292930.1	MAGVPIAFSEVLNLQQLGIPETSIKHGLTTMESDKWIVSVEPTQVSLIDLQNQAAVTRRPIKAEAAVMNPSSNILALRSGKMIQMFNLDTKQKLKSHDMDSPIVFWKWTSADNLALVTATSVHHWSSTEGSSAPTKMFDRHPTIGPNTQIINYQVSPDSKWCLLGGISANPGGGVNGNMQLYSVEKKVSQPLQGHAGAFHKFKVSGREDEAQVLVFHEKKSDDPAHKLFVMEVGRDPSKGQPFRIPPTVIPVPPEAAADFPVSLVVDAKDDVAFLLSKMGFVYMFDIQSGKTMFRTRITQETVFVTCSQSSTGAVFGITVRTGKVLRISLNGQNLVPYIVNTLRDNDLAIKVAGRLGLPGAEHLYTAEFERLISAGQVKEAAVLVANSGSALRTPQTIA…	100	0	gi|224007941|ref|XP_002292930.1|	clathrin heavy chain [Thalassiosira pseudonana CCMP1335]	47.78	0	sp|Q68FD5|CLH1_MOUSE	Clathrin heavy chain 1 OS=Mus musculus GN=Cltc PE=1 SV=3	-	-	-	-	-	-	K04646|1|0.0|1486|thj:104826847| clathrin heavy chain	GO:0016192//vesicle-mediated transport;GO:0006886//intracellular protein transport	GO:0005198//structural molecule activity	GO:0030130//clathrin coat of trans-Golgi network vesicle;GO:0030132//clathrin coat of coated pit
286	ACI64777.1	predicted protein [Thalassiosira pseudonana CCMP1335]	86679.4	0.019	4	10	0.43	0.236	0.04717	ACI64777.1	MSSDQSDSMGRSDDDEEVPMKAAAKDNNGGGGENKEADSSFLDDDFLSFGGVGSADGDGAEADDGRGGGGGANYNSGADRRNSGGGNGCKRERSLSLVPTNTIPWLDIAATQQQQQRNTNNYQQQNSHNDRSRGYGGGTNPNYNTNSNYNNSYSPPLVKLHNEMVSFVKLMEPTKEELEVRERMVKRVTELAERTFGKGKCEVLPFGSQVTGLCLPNSDIDFVIRFPKKKKDATKIKKGGSKPDAINLDESEKKTKEKDGGQEEGEDLEDLISNPLHKLAEAVREEFGIRSELDTMDPAVDDEVDDASEHLSYLEVIEQTRVPLVKFTVAPYNLDIDVCFDQPGGPESAELMHRFMESMPPLRPLTFILKYFLASRDMNKPYTGGIGSYLLQIMIVSFL…	100	0	gi|224004818|ref|XP_002296060.1|	predicted protein [Thalassiosira pseudonana CCMP1335]	36.94	4e-34	sp|Q8NDF8|PAPD5_HUMAN	Non-canonical poly(A) RNA polymerase PAPD5 OS=Homo sapiens GN=PAPD5 PE=1 SV=2	-	-	-	-	-	-	K03514|1|3e-39|150|mis:MICPUN_69731| non-canonical poly(A) RNA polymerase PAPD5/7 [EC:2.7.7.19]	-	-	-
287	YP_009093250.1	RNA polymerase alpha subunit (chloroplast) [Roundia cardiophora]	35312.9	0.153	1	5	0.75	0.088	0.01412	YP_009093250.1	MNTSNLLMECVKSEKLESGSMYGQFQIQSLMPGQGITIGNLLRRVLLGDLGGTAITGVRIAGIKDEFSLIPGVREDILEILLNLKGIVLKSKISNRQFGRLRLHGPAVITASSIQLSSEVEIINPNHYIATILDTHLLEIEFKIESGIGYRLANELFSDKFEDFIEIDAIFMPVQKVDFKIDNVYDNSATLTERLIIDVWTNGSISPEQAIFSGSKLIRDLFKFVNEQKINKEKEISQEKNSLKPRDPYIHIAIEELQLSVRPYNCLKRAQINTIGDLLEYSPEKLLELKNFGRKSADEVFATLKNKLGIVLK	100	0	gi|700658245|ref|YP_009093250.1|	RNA polymerase alpha subunit (chloroplast) [Roundia cardiophora]	85.62	0	sp|A0T0Z4|RPOA_THAPS	DNA-directed RNA polymerase subunit alpha OS=Thalassiosira pseudonana GN=rpoA PE=3 SV=1	308	5e-103	COG0202	DNA-directed RNA polymerase, alpha subunit/40 kD subunit	K	Transcription	K03040|1|7e-47|167|ppp:PHYPADRAFT_168194| DNA-directed RNA polymerase subunit alpha [EC:2.7.7.6]	GO:0006351//transcription, DNA-templated	GO:0003899//DNA-directed RNA polymerase activity;GO:0003677//DNA binding;GO:0046983//protein dimerization activity	GO:0009507//chloroplast
288	XP_002289769.1	RL11A, ribosomal protein 11A 60S large ribosomal subunit [Thalassiosira pseudonana CCMP1335]	20263.7	0.198	1	2	0.54	0.144	0.01648	XP_002289769.1	MASEGKKNPMKDIKVDKLILNCCVGESGDRLTRAARVLEQLTGQQPVYSKARYTLRSFGIRRNEKISVHVTVRGEKALEILERGLKVKEYELLQQNFSETGNFGFGINEHIDLGIKYDPTTGIYGMDFFVCLTRPGARVARRKVRQSRVGFAHKIKKEEAIQWFQDKFEGVVLAKAT	100	1e-129	gi|224000193|ref|XP_002289769.1|	RL11A, ribosomal protein 11A 60S large ribosomal subunit [Thalassiosira pseudonana CCMP1335]	72.88	7e-93	sp|Q0DK10|RL11_ORYSJ	60S ribosomal protein L11 OS=Oryza sativa subsp. japonica GN=RPL11 PE=2 SV=1	162	1e-49	COG0094	Ribosomal protein L5	J	Translation, ribosomal structure and biogenesis	K02868|1|3e-94|274|sot:102584982| large subunit ribosomal protein L11e	GO:0006412//translation	GO:0003735//structural constituent of ribosome	GO:0005840//ribosome
289	EED91398.1	predicted protein [Thalassiosira pseudonana CCMP1335]	123771	0.014	1	1	0.79	0.111	0.04038	EED91398.1	MVRKKLDERIRTLFSHCLRTNQRALLLLVGDHGKDQIPNLHQIMDRTANMSKSERLGSINNGNSSVLWCYKKELGFSTHRKKRMEKIKRDKKRGLAKSSSSNNAAATAAAEQMDNFELFLNNTNITWCYYKDSHRVLGTTHSILVLQDFEALTPNIMARTIETVQGGGLVVFLLRTVKSLRQLYAMTMDVHSRYRTESSGDVVPRFNERFILSLGGCANCLVCDDELNILPLSKKTLARLTKMGTSPTAYDDDGEEQQQVVTYKTDDDVQLEQLKQTLQDTPHVGKLVELTKTLDQARAVLTFLEASGKSTTVSLTAPRGRGKSAALGLCLAGAISFGFNSVVVTAPEPENLVSVFQFLIEGLKALKYQEHYDYTIGYNYGMDSNEGNNRGEKAGRDNI…	100	0	gi|224003239|ref|XP_002291291.1|	predicted protein [Thalassiosira pseudonana CCMP1335]	43.92	0	sp|P53914|NAT10_YEAST	RNA cytidine acetyltransferase OS=Saccharomyces cerevisiae (strain ATCC 204508 / S288c) GN=KRE33 PE=1 SV=1	216	2e-56	COG1444	tRNA(Met) C34 N-acetyltransferase TmcA	J	Translation, ribosomal structure and biogenesis	K14521|1|0.0|729|mpp:MICPUCDRAFT_56289| N-acetyltransferase 10 [EC:2.3.1.-]		GO:0008080//N-acetyltransferase activity	-
290	XP_002288279.1	l-lactate dehydrogenase [Thalassiosira pseudonana CCMP1335]	47731.4	0.109	2	2	0.82	0.056	0.009588	XP_002288279.1	MALNPHKLGVHKILKHIPLNALFDAPSKARLRKAVNIADLRLCAKQRAHKMVFDYLDAGADDEISLRRGKDAYSELEMHFHILSGLKPPLDLSTKIFGQDVKLPFFGCPTAGNRMFHWEGETAAAKAAQHHGTLYGLSSLATTGITEIGKLTDGPKVFQLYVWKDRELVKEVLAKAKEGGFNAMALTVDFTWYGNRERDIRNDFSIPPKYSMAQIVEAIRKPAWTYDFLSHEPYTYACINTDVPADSLAAFVNSQLCPEFDWRDAEWLLGEWNMPSAVKGVCRPDDAIKAVETGFTTMWVSNHGARQLETSPATIDVLPSIREAVGPDVEIILDGGVQRGTDICKALALGADSVGVGKPYLYGLAAGGTEGVIKAYDILKVELDRAMGLLGAGTVDELK…	100	0	gi|223997212|ref|XP_002288279.1|	l-lactate dehydrogenase [Thalassiosira pseudonana CCMP1335]	37.24	2e-77	sp|P9WND5|LLDD_MYCTU	Putative L-lactate dehydrogenase OS=Mycobacterium tuberculosis (strain ATCC 25618 / H37Rv) GN=lldD PE=1 SV=1	306	9e-100	COG1304	FMN-dependent dehydrogenase, includes L-lactate dehydrogenase and type II isopentenyl diphosphate isomerase	CIR	Energy production and conversion;Lipid transport and metabolism;General function prediction only	K11517|1|2e-81|259|cme:CYME_CMQ436C| (S)-2-hydroxy-acid oxidase [EC:1.1.3.15]	GO:0055114//oxidation-reduction process	GO:0052852//very-long-chain-(S)-2-hydroxy-acid oxidase activity;GO:0004460//L-lactate dehydrogenase (cytochrome) activity;GO:0052854//medium-chain-(S)-2-hydroxy-acid oxidase activity;GO:0052853//long-chain-(S)-2-hydroxy-long-chain-acid oxidase activity;GO:0010181//FMN binding	-
291	EED93736.1	formate/nitrite transporter family member [Thalassiosira pseudonana CCMP1335]	28108.5	0.059	1	2	0.62	0.165	0.03236	EED93736.1	MSGGASVVPDLKAPPAIYEGAVAAGAAKASASWEKIFKLGIAAGCHIGFGSYLAITVGGACPQIAEANPGLQKIIFGAFGLPFGLIMTLVTGAELFTGNTALVTAAVMEGKTTTKDLIKNWVASYAGNVVGSLILAYLAFKSGTLGNAPASVAIATAKCSLPFETAFVRGILCNWLVCMAVYMASGCASLAGKMVAVWFPISAFVALGLDHSVANMFIIPLGMMRGAQITVGDFITKNLIPVTLGNIVGGALCVMGIYGSAFGKWFKSKDE	100	0	gi|223997254|ref|XP_002288300.1|	formate/nitrite transporter family member [Thalassiosira pseudonana CCMP1335]	41.13	2e-48	sp|Q50568|FDHC_METTF	Probable formate transporter OS=Methanothermobacter thermautotrophicus GN=fdhC PE=3 SV=1	211	2e-66	COG2116	Formate/nitrite transporter FocA, FNT family	P	Inorganic ion transport and metabolism	-	GO:0006810//transport	GO:0005215//transporter activity	GO:0016020//membrane
292	EJK68945.1	hypothetical protein THAOC_09844 [Thalassiosira oceanica]	35033.7	0.089	1	2	0.51	0.124	0.01095	EJK68945.1	MAGVSGGLLAAEVTRAGGLGFIAAGHFQDITKLEAQIKLYIEASGKPTDLAIGFIGFSSLATQSQWENYDYILRTYRPKAVQFFAPSIVTNDSGGPSNVELAHSYGSKVLAQVGTLKDAREAMRHGVDAIICQGREAGGHGLRREAGNSTLALASQAAQISESTPIVAAGGITKGKHIASALAVGCQAVSIGTRFWACEESIGDETLQKELIKENSCDDVVRTTAFDELNNEISSIKWPKPYDSSGVLRNKITDDWDERPSSDLQHAINHSDLLEQYKAERGQTTSTAIYAGEGVGEVHSIEGAYATLLRLEQETMQAIERLKSL	100	0	gi|397628538|gb|EJK68945.1|	hypothetical protein THAOC_09844 [Thalassiosira oceanica]	27.27	1e-18	sp|Q01284|2NPD_NEUCR	Nitronate monooxygenase OS=Neurospora crassa (strain ATCC 24698 / 74-OR23-1A / CBS 708.71 / DSM 1257 / FGSC 987) GN=ncd-2 PE=1 SV=1	105	3e-24	COG2070	NAD(P)H-dependent flavin oxidoreductase YrpB, nitropropane dioxygenase family	R	General function prediction only	-		GO:0016491//oxidoreductase activity	-
293	EJK69095.1	hypothetical protein THAOC_09683, partial [Thalassiosira oceanica]	57724.5	0.054	1	1	0.58	0.117	0.01186	EJK69095.1	RQVFLVLKKIPLLGYHPASDLHHHVQNSGGVWAGGWAGKRLKNALAGAGGGRAGAREPFIIFTHLPTILVRPLPAAARLAVYRFHYLGGHDPAPGFVAKAAAQREAKQQTSNRYIMSRARVYADVNVHRPRDYWDYEALTVNWGDQEDYEVIRKIGRGKYSEVFEGVNVSNNSKCVIKILKPVKKKKIKREIKILQNMCGGTNIIQLLDVVRDPQSKTPSLIFEHVNNTDFKILYPTLSDYDIRYYIFELLKALDYCHSNGVMHRDVKPHNVMIDHEKRQLRLIDWGLAEFYHPGREYNVRVASRYFKGPELLVDLQEYDYALDMWSLGCMFAGMIFRKEPFFHGHDNYDQLVKIAKVLGTEELFHYLDTYDLELDPHFDGILGRHSKKPWQKFVTNEN…	100	0	gi|397628896|gb|EJK69095.1|	hypothetical protein THAOC_09683, partial [Thalassiosira oceanica]	80	0	sp|B6F107|HD6_ORYSJ	Casein kinase II subunit alpha-2 OS=Oryza sativa subsp. japonica GN=HD6 PE=3 SV=1	79.3	3e-14	COG0515	Serine/threonine protein kinase	T	Signal transduction mechanisms	K03097|1|0.0|533|mpp:MICPUCDRAFT_30735| casein kinase II subunit alpha [EC:2.7.11.1]	GO:0006468//protein phosphorylation	GO:0005524//ATP binding;GO:0004674//protein serine/threonine kinase activity	-
294	AAZ99426.1	NADH dehydrogenase subunit 7 (mitochondrion) [Thalassiosira pseudonana]	46217.6	0.065	1	1	0.76	0.118	0.03473	AAZ99426.1	MTVKKKNLLKKIKNFTINFGPQHPAAHGVLRLVLELNGEIVNRADPHIGLLHRGTEKLIEYKNYVQALPYFDRLDYVSMMAQEHSYCLAIEKLFNCKIPERAQYIRVLFAEITRILNHLLAVGCHAMDVGAMTPFLWAFEEREKLMEFYERVSGARMHAAYFRPGGLQVDIPKGLLDDIYMFIEQFTLRLTEMEDMLTENRIWKQRLVDIGVVTAKDACQWGFSGVMLRGSGINWDLRKSQPYEVYEKLEFDIPVGTNGDCYDRYLIRVFEMKESLKIIEQCLNLMPAGYVKTNDFKISPPTRVEMKQSMEALIHHFKMYTQGVIIPSNETYIGTEAPKGEFGVYLISDNTNRPYRCKIKAPGFNHLQALDFMSKGHLIADVVTIIGTQDIVFGEVDR	100	0	gi|74325199|ref|YP_316619.1|	NADH dehydrogenase subunit 7 [Thalassiosira pseudonana]	78.65	0	sp|O21270|NDUS2_RECAM	NADH-ubiquinone oxidoreductase 49 kDa subunit OS=Reclinomonas americana GN=NAD7 PE=3 SV=1	597	0	COG0649	NADH:ubiquinone oxidoreductase 49 kD subunit (chain D)	C	Energy production and conversion	K03935|1|0.0|659|ota:OstapMp15| NADH dehydrogenase (ubiquinone) Fe-S protein 2 [EC:1.6.5.3 1.6.99.3]	GO:0019684//photosynthesis, light reaction;GO:0055114//oxidation-reduction process	GO:0051287//NAD binding;GO:0048038//quinone binding;GO:0008137//NADH dehydrogenase (ubiquinone) activity	GO:0005886//plasma membrane;GO:0005739//mitochondrion
295	EJK54738.1	hypothetical protein THAOC_25610 [Thalassiosira oceanica]	40177.6	0.075	1	1	0.56	0.037	0.0003914	EJK54738.1	MFFGGGKKRVDEDRTHLNTSPTRLEAVLGEGMGGRPRADVDTTKLYETLGVSQGAAGLSLFTTSHLVHPHMTGRQECQWQGNKEGEQKMRRAVCVVYVLKLAVKHHPDKGGDEQKFKEISAAYEILSDTEKRATYDKYGLEGLSEDGGRSRASGPKKGESVNHPLKVSLEDLYNGKTAKIAINRQVIVGEAKICNTCDGQGVVLELRQIALGMVQQIQRRCTDCGGTGYRATRKKERKILEVLVEKGMKHNEKIQFRGMADEKPNMEAGDVNFIIQEKDHDLFKRKGADLLITKTLSLNEALCGFEWTFKHLDGREIAIKSKPGEVIKPEATSTQPFVKIVPNEVRSDLQHDKTSLFG	100	0	gi|397589637|gb|EJK54738.1|	hypothetical protein THAOC_25610 [Thalassiosira oceanica]	39.94	3e-72	sp|P42825|DNAJ2_ARATH	Chaperone protein dnaJ 2 OS=Arabidopsis thaliana GN=ATJ2 PE=1 SV=2	106	5e-24	COG0484	DnaJ-class molecular chaperone with C-terminal Zn finger domain	O	Posttranslational modification, protein turnover, chaperones	K09503|1|1e-81|258|gsl:Gasu_13240| DnaJ homolog subfamily A member 2		GO:0046872//metal ion binding;GO:0005515//protein binding	-
296	EJK64776.1	hypothetical protein THAOC_14455, partial [Thalassiosira oceanica]	21848.7	0.041	1	1	0.71	0.134	0.0331	EJK64776.1	LFNERRTNSDGDEITLMAHLVGGSYLLTKLLMPELEKADDPRVIYVASGGMYNTKFPSWEEAASSGKFESKYNGNMAYAYAKRGQVLLAERLASQYPGIKFVSCHPGWTKTEGVDAAYGSQASILEPMRTLWEGSEGICWLATSPSTDLEGGAFYLDRKPQRNIFAGPFFTDGTYTRNTDTEVDDMMKKLLEKVGV	100	3e-146	gi|397618151|gb|EJK64776.1|	hypothetical protein THAOC_14455, partial [Thalassiosira oceanica]	39.76	4e-27	sp|A6QP05|DHR12_BOVIN	Dehydrogenase/reductase SDR family member 12 OS=Bos taurus GN=DHRS12 PE=2 SV=1	95.9	2e-21	COG3427	Carbon monoxide dehydrogenase subunit G	C	Energy production and conversion	K11168|1|4e-27|108|egu:105040303| dehydrogenase/reductase SDR family member 12 [EC:1.1.-.-]	GO:0055114//oxidation-reduction process	GO:0016491//oxidoreductase activity;GO:0000166//nucleotide binding	-
297	XP_002295532.1	predicted protein [Thalassiosira pseudonana CCMP1335]	67014.8	0.019	1	1	0.77	0.046	0.002888	XP_002295532.1	MYGKKLDERDLDKVSNNPNHTKICREPPPNHEFSYRWFRGPTVEPCAYEGCPRRTSFSPHDWSKHALGGSGCSLQCVSTQSSLYKATFCNANCFVKAWKTQYTVQSDVPQARSSTPQRRRLGSYADDDDTRSVNSVNSGRSDYNPPGTPREITVGGNANTPRGNNGGYNDHHGQSEEWIEISRDQLYVPNENDVGRKLKLEAAAYAIDSGELLMHRVVKTDLVLSRTSELDKRNFITSKPSGGGGARFRIVTYNILAEIYATQQQYPHADLWSLSWDFRFQNIIREIVDVGPDIVCLQEVQADHYESHLYNAMHDAGFEGVFKQKTRQSMGMTGKVDGCALFWRRTKFHLIESYSIEFNELAQRQVTQVMGLNPRSEEGAAILSKLSKDNVAQLVVLEL…	100	0	gi|224011515|ref|XP_002295532.1|	predicted protein [Thalassiosira pseudonana CCMP1335]	29.89	2e-69	sp|Q9M2F8|CCR4B_ARATH	Carbon catabolite repressor protein 4 homolog 2 OS=Arabidopsis thaliana GN=CCR4-2 PE=2 SV=2	70.1	1e-11	COG5239	mRNA deadenylase, 3'-5' endonuclease subunit Ccr4	A	RNA processing and modification	K12603|1|5e-77|258|mis:MICPUN_55915| CCR4-NOT transcription complex subunit 6 [EC:3.1.13.4]	-	-	-
298	EJK55684.1	hypothetical protein THAOC_24553, partial [Thalassiosira oceanica]	27495.8	0.038	5	6	0.7	0.084	0.008871	EJK55684.1	MFRTTAHCDAPPPPPPALPAIGDSAAAKSAAESNSDSSASTSSASAPPPPPEDDAIARAAQSVSSCPNPGPLDMATYDVRRLTSLDTYDGFRCDISKQLSPYFACVHSFHLGTTSLPDGKNASYSFSTNFNDEEGFMMARVDPERGSVDGRIHKALLGGLAMGKIQVSLSSEGQNDMVQGDLDVGAQTWTANLKYGSMGGANMFGCNYLQSVSPRLQMGGEGMYIGANGALMSSYTAKLLFPDGPGADGGDAPAAAAPPQGPPE	100	5e-136	gi|397592488|gb|EJK55684.1|	hypothetical protein THAOC_24553, partial [Thalassiosira oceanica]	29.14	3e-09	sp|P23644|TOM40_YEAST	Mitochondrial import receptor subunit TOM40 OS=Saccharomyces cerevisiae (strain ATCC 204508 / S288c) GN=TOM40 PE=1 SV=1	-	-	-	-	-	-	K11518|1|1e-18|87.4|gsl:Gasu_23460| mitochondrial import receptor subunit TOM40	GO:0055085//transmembrane transport;GO:0044070//regulation of anion transport	GO:0008308//voltage-gated anion channel activity	GO:0005741//mitochondrial outer membrane
299	EJK63460.1	hypothetical protein THAOC_15874 [Thalassiosira oceanica]	75556	0.018	2	5	0.76	0.038	0.00163	EJK63460.1	MRPFGELLTDMERRGILIATDYLAGVEVQARKDRVEHVETFRQWAAEQIGPDGLAMNLGSSTQLSTFLFGGAANPKTKEHSEVQRVFRTKREEIPDDAMEAYRERDAKLRETAPDAAETDEERDYGFLTKLKATDLKALCKEEGLKVSGKKQELIDRLVGAYQLKDQHKQDPSIPVSNLEEYKSMKKDDLRDAVVGRGLSPPAKAKKTDLVRLLEDDDEMQRQLMAECAKSPDADRPGGDAMVYRKMSELLEEAASSGENPMLAQILADVKAKNEEEPKWVDVTITSLGMVPDKFTVGGAPSATADVLRGLAGDPFADPPKYGKAYEFFEAKKAGSGHDACVAFYSLTAIGSIDTMIANFLTSLQALVDDRNRVHNSININTETGRLSSRKPNLQNQPA…	100	0	gi|397615480|gb|EJK63460.1|	hypothetical protein THAOC_15874 [Thalassiosira oceanica]	51.05	9e-120	sp|Q84ND9|POLIB_ARATH	DNA polymerase I B, chloroplastic/mitochondrial OS=Arabidopsis thaliana GN=POLIB PE=2 SV=1	206	1e-54	COG0749	DNA polymerase I - 3'-5' exonuclease and polymerase domains	L	Replication, recombination and repair	K02335|1|4e-126|388|dosa:Os04t0637400-01| DNA polymerase I [EC:2.7.7.7]	GO:0006260//DNA replication	GO:0003887//DNA-directed DNA polymerase activity;GO:0003677//DNA binding;GO:0008408//3'-5' exonuclease activity	GO:0005622//intracellular
300	EJK72408.1	hypothetical protein THAOC_06063, partial [Thalassiosira oceanica]	38930.3	0.028	1	4	0.82	0.063	0.01305	EJK72408.1	NDTPLGVGRLACGPAVGSPSLALSVRRSEAMDAMRVFCAVCASLLMLLSSVHGFSTLITFDVDGTLVSSSPGWEKGAHGRSFIHAVDKVLGRDDAFGPSATIPELLESHEFHGSTDGLILMRLARRLLGSSFDKDVASSKVQEMMREMYRFVSECDDKQVGTGIAPLPGVIDTLKSISESYDDVAVGLVTGNVEGIARRKMKALGLLDTNVFTSLEDSQGTEWEGVEELRFLGGFGSDYCSGSIDDFSRNHLDRGEQLAICVQRCLSIMDDPSQLRRIIHVGDAPADVLAARSYVEHSTKPTDLSVSVVGVSTGSYSVEELSDLCGDEVEGVWLPIVLEHGEGVGNRDIFLRACGLLR	100	0	gi|397636767|gb|EJK72408.1|	hypothetical protein THAOC_06063, partial [Thalassiosira oceanica]	-	-	-	-	65.9	1e-10	COG0546	Phosphoglycolate phosphatase, HAD superfamily	C	Energy production and conversion	-	-	-	-
301	ACI64714.1	human U6 snRNA-associated Sm-like protein LSm8-like protein [Thalassiosira pseudonana CCMP1335]	11472.7	0.085	1	2	0.7	0.088	0.01038	ACI64714.1	MASTLSDWTNKPVTILTCDGRLITGILLGYDQLQNLILQKSYESVYSLDSPVEKVELGLFVVRGDNVAVVGDGNSTVDVEGEEEGNSGEDDTVRAEPIQPIVQNVT	100	1e-61	gi|224004692|ref|XP_002295997.1|	human U6 snRNA-associated Sm-like protein LSm8-like protein [Thalassiosira pseudonana CCMP1335]	41.75	6e-22	sp|Q5RCP3|LSM8_PONAB	U6 snRNA-associated Sm-like protein LSm8 OS=Pongo abelii GN=LSM8 PE=3 SV=3	-	-	-	-	-	-	K12627|1|2e-20|81.6|apro:F751_5776| U6 snRNA-associated Sm-like protein LSm8	-	-	-
302	XP_002293335.1	predicted protein, partial [Thalassiosira pseudonana CCMP1335]	77340.7	0.084	1	1	0.74	0.061	0.005013	XP_002293335.1	LNTSYDRCVILTNLPKVNEAKYEKLSKVVLKLVSRIGNLASYEGSDEFTGFYMPFDKEGDATKGCAFIEYESASDAKKAMEVLDDYKFDKNHSLKVTLHERAAELERVEEGEFTQPEPEPFKERANTMAWLEDSCQRDQFSIRHGNETEVLWCDGKGDPVVDYDGSREKKAGINWCDYYTQWSPKGSYFATLVPNKGVILWGGESFEKLGRFPAPGVDFVSFSPQENYIMTNNNNRNDPNAIKVFSIQSGKLLRAFPLYPKDFLEESANAENVPPPPFQWSFDDKYLARMGKDLISVFETSTMKLLDKRSLACDGIHEFQFSPKANIIAYWAPEHKNQPAHVDLIEIPSRKKLRQKNLFNVSNCQMVWQEGGEYLGVKVTRHTKSKKTLYNNLELFRVN…	100	0	gi|224008753|ref|XP_002293335.1|	predicted protein [Thalassiosira pseudonana CCMP1335]	37.65	6e-143	sp|P55884|EIF3B_HUMAN	Eukaryotic translation initiation factor 3 subunit B OS=Homo sapiens GN=EIF3B PE=1 SV=3	-	-	-	-	-	-	K03253|1|5e-155|468|pmum:103318763| translation initiation factor 3 subunit B	GO:0006413//translational initiation	GO:0000166//nucleotide binding;GO:0003743//translation initiation factor activity	GO:0005737//cytoplasm
303	EED88807.1	RL8, ribosomal protein 8, partial [Thalassiosira pseudonana CCMP1335]	28192.1	0.117	1	1	0.67	0.141	0.0274	EED88807.1	MGKYVQAQRKGKSPVFKAHTRTRKGAVKLRSIDYAERRGYVRGVVKEILHDPGRGAPVAKIQFLNAYRFKRDTELMVATEGMYTGQFIYCGKKATLNCGNVLPLKQVPEGTIVCNIEAKVGDRGAFARGSGCFAVVISHDEDKGTTRLRLPSGGKKTVSSNVRAQIGVVAGGGRTDKPLLKAGRAYHKYAVKRNCWPKIRGVAKNPVEHPFGGGNHQHIGRPSTVSKEAPAGRKVGLIGARRTGRLRGVKKLGQDKD	100	0	gi|224009680|ref|XP_002293798.1|	RL8, ribosomal protein 8 [Thalassiosira pseudonana CCMP1335]	67.7	7e-129	sp|P41116|RL8_XENLA	60S ribosomal protein L8 OS=Xenopus laevis GN=rpl8 PE=2 SV=3	238	2e-77	COG0090	Ribosomal protein L2	J	Translation, ribosomal structure and biogenesis	K02938|1|4e-126|361|sot:102579483| large subunit ribosomal protein L8e	GO:0006412//translation	GO:0003735//structural constituent of ribosome;GO:0003723//RNA binding;GO:0016740//transferase activity	GO:0015934//large ribosomal subunit;GO:0009507//chloroplast
304	EED93043.1	predicted protein [Thalassiosira pseudonana CCMP1335]	29295.4	0.33	1	5	0.6	0.032	0.0003227	EED93043.1	MTMANRSKMSIKRRFVADGVFYAELNELLTRELAEDGYAGVEVRTTPHRTEIIIRATKTQNVLGEKGQRIRELTSVVQKRFDFAEGAVELYAERVQNRGLCAQAQAESLKFKLLAGLAVRRACYGVVRFVMEASAKGCEVIVSGKLRGQRAKGMKFGDGYMIKTGHAGQVYTDVAVRHVLMRQGVIGIKVAIMLPHDPKGVQGPKIPLDDVVTILEPKEEPSPESILQAQQAAEAAAAAAAQAALQQQLLAQQQAEMAAAGGAPAVDAGF	100	2e-166	gi|223999667|ref|XP_002289506.1|	predicted protein [Thalassiosira pseudonana CCMP1335]	75.23	7e-115	sp|Q9M339|RS32_ARATH	40S ribosomal protein S3-2 OS=Arabidopsis thaliana GN=RPS3B PE=1 SV=1	128	1e-34	COG0092	Ribosomal protein S3	J	Translation, ribosomal structure and biogenesis	K02985|1|3e-121|348|sbi:SORBI_02g038990| small subunit ribosomal protein S3e	GO:0006412//translation;GO:0009651//response to salt stress	GO:0003735//structural constituent of ribosome;GO:0003723//RNA binding	GO:0005730//nucleolus;GO:0022626//cytosolic ribosome;GO:0005773//vacuole;GO:0005886//plasma membrane;GO:0015935//small ribosomal subunit;GO:0009507//chloroplast
305	EJK70774.1	hypothetical protein THAOC_07839 [Thalassiosira oceanica]	15649.7	0.122	1	3	0.83	0.061	0.01548	EJK70774.1	MFSLTDGTNCDETTNPSGPSLIIYPYQARKLRKYKERRLDGYHGGPNMGENLADVLNSIEVEDDVAVPQEEDAFVDPEQAVITKVKSFDLSKPISIKEAIFALDYIDHDFYVFRDEESNDVSVVYKRNAGGVGLIQPEQ	100	1e-99	gi|397632968|gb|EJK70774.1|	hypothetical protein THAOC_07839 [Thalassiosira oceanica]	40.87	3e-16	sp|P74518|HPF_SYNY3	Ribosome hibernation promotion factor OS=Synechocystis sp. (strain PCC 6803 / Kazusa) GN=hpf PE=3 SV=1	76.6	2e-16	COG1544	Ribosome-associated translation inhibitor RaiA	J	Translation, ribosomal structure and biogenesis	-	GO:0044238//primary metabolic process	-	-
306	EED93824.1	predicted protein [Thalassiosira pseudonana CCMP1335]	46689.9	0.027	1	2	0.66	0.173	0.04399	EED93824.1	MSFGGGRGRGRGSGRGGSSKPPSNSSPGSQPKLQVCRNFASTGNCHHGDRCNFSHVVKMHASIVASDKNPDAKPSYSNYHGGRGGGGKSKDLYKVTSVAVWETNGAIKLFTGSHDGKWRLWNTAPNPNGGGATLTQEFEHFVGGPVDTVHIASHFFFCGFEASPGEAPDAKAGMVHTWNLNAASEPPLELCLSPMAKYAGSGRIRSLWTTVDGRVWSGGTDGVIRQWAFSPTGGPTGTGGFALVRSMESHLGAVTGITLVGTMLWSGGMDGTIRLWNVDSGDCAHLIPAVKKDTTNATSGGAQAPPTGHSGPVTGLLPFEAPNNQGSFVFSSSLDDTVKVWNATNGECVASESHGQGVTSIALTSDLKGNPLLLCGLFYGDIMVRGTISSPPLVLLLKL…	100	0	gi|223997430|ref|XP_002288388.1|	predicted protein [Thalassiosira pseudonana CCMP1335]	24.38	1e-15	sp|Q0DYP5|C3H17_ORYSJ	Zinc finger CCCH domain-containing protein 17 OS=Oryza sativa subsp. japonica GN=Os02g0677700 PE=2 SV=2	63.9	5e-09	COG5635	Predicted NTPase, NACHT family domain	T	Signal transduction mechanisms	K10260|1|5e-18|89.7|bvg:104901868| F-box and WD-40 domain protein 7!K12862|4|4e-14|78.2|rcu:8258474| pleiotropic regulator 1		GO:0008270//zinc ion binding;GO:0003676//nucleic acid binding	-
307	EED91098.1	predicted protein, partial [Thalassiosira pseudonana CCMP1335]	12314.8	0.089	1	1	0.7	0.101	0.01574	EED91098.1	LGILFLFDSTLLALGDLLFLTGLTLTIGVSRTLRFFSRKDRIRGIVAFFGGVTLVMLRWPMIGMVAQVYGLIYLFGQFFPIAAASLKDVPVVGSVFRHATVERFFSSFGGGR	100	1e-53	gi|224002639|ref|XP_002290991.1|	predicted protein [Thalassiosira pseudonana CCMP1335]	36.78	7e-17	sp|Q54CL4|GOT1_DICDI	Protein transport protein got1 homolog OS=Dictyostelium discoideum GN=golt1 PE=3 SV=1	-	-	-	-	-	-	-	GO:0016192//vesicle-mediated transport	-	-
308	EJK74458.1	hypothetical protein THAOC_03860 [Thalassiosira oceanica]	34930.3	0.062	1	17	0.5	0.067	0.001887	EJK74458.1	MANKFKEAFQKMAKNMPKGGGGLPGGGGGRGSGAALAASRAVGSLVVAGGLGYGAYNSVFTVDGGHRAVVYNRIIGMKDVVYGEGLNFNVPWFERPVVYDIRTRPVNLQTLTGSKDLQMVTMGVRVLHKPDPSQLVWMYRHLGKNYDERILPSLMNECAKAVVARYNANELLTKREEVSASISRELSARCAGFHVLLEDVAITHLAFSPEYAKAVEAKQVAQQEAERAKYIVLGAVQEKKTIITRARGEAESAELIGTAVKRNPGFMKLRRIDAAKDIADIVSGSGNRIYLNADSLLLNLLGDADEKFTKSVEGRGGWLRK	100	2e-176	gi|397641076|gb|EJK74458.1|	hypothetical protein THAOC_03860 [Thalassiosira oceanica]	54.27	3e-81	sp|P50093|PHB2_CAEEL	Mitochondrial prohibitin complex protein 2 OS=Caenorhabditis elegans GN=phb-2 PE=1 SV=2	135	4e-36	COG0330	Regulator of protease activity HflC, stomatin/prohibitin superfamily	O	Posttranslational modification, protein turnover, chaperones	K17081|1|3e-87|267|vcn:VOLCADRAFT_106045| prohibitin 2			GO:0045271//respiratory chain complex I;GO:0009536//plastid;GO:0005739//mitochondrion;GO:0071944//cell periphery
309	XP_002294653.1	mitochondrial alternative oxidase [Thalassiosira pseudonana CCMP1335]	30003	0.102	1	1	0.76	0.141	0.05129	XP_002294653.1	MFTKTHGKYTKEELDIKMTHVEPESALDRLALFAVKVTRFGFDQATGWNRGSITTDKVLNRAIFLETVAAIPGMVAAIIRHFRSLRNMARDGGMLNMFLEEANNERMHLLTFIRMKDPGYLFRGAVVGSQFAFGSAFLVLYMISPAFCHRFVGYIEEEACATYTKIIKAIEEAPEGSDLAKWRTEEAPKIAKGYWHLGEEGTVLDVMRAVRADEAEHRDVNHAVSGVAHDTVNPLYDPREKMDSMMKRYVKDMMERSETKTATS	100	0	gi|224012000|ref|XP_002294653.1|	mitochondrial alternative oxidase [Thalassiosira pseudonana CCMP1335]	43.57	7e-62	sp|O74180|AOX_ASPNG	Alternative oxidase, mitochondrial OS=Aspergillus niger GN=aox1 PE=2 SV=2	134	5e-37	COG2941	Demethoxyubiquinone hydroxylase, CLK1/Coq7/Cat5 family	H	Coenzyme transport and metabolism	K01868|1|8e-56|196|csl:COCSUDRAFT_64793| threonyl-tRNA synthetase [EC:6.1.1.3]!K17893|2|7e-49|168|egu:105033544| ubiquinol oxidase [EC:1.10.3.11]	GO:0007585//respiratory gaseous exchange;GO:0055114//oxidation-reduction process		GO:0005740//mitochondrial envelope;GO:0016020//membrane
310	EJK75419.1	hypothetical protein THAOC_02860 [Thalassiosira oceanica]	29379.6	0.109	1	2	1.26	0.225	0.09311	EJK75419.1	MRISIALMSLPAASAWSTLTMKQSGVNSSRRDMLQKGAALATSIAIPASANAYAVPDLLYPFEALEPYIDAPTMKIHHDKHHATYVANINKATEGKPEVDILDLQLNALEAGPVRNSGGGHYNHAFFWDEMAPPDQAAKTKPSPELEAMINKSFGSFDEMKAAFEAQAAPGAVFGSGWVWVCLSSDGEELKIVGTPNQDNPLMKGVADEVMFPILGIDVWEHAYYLKYQNRRPEYVSNWWNVVNWDKINENFTYVTEKKAGVPVRG	100	0	gi|397642733|gb|EJK75419.1|	hypothetical protein THAOC_02860 [Thalassiosira oceanica]	51.89	3e-67	sp|Q42684|SODM_CHLRE	Superoxide dismutase [Mn], mitochondrial OS=Chlamydomonas reinhardtii GN=SODA PE=2 SV=1	212	5e-67	COG0605	Superoxide dismutase	P	Inorganic ion transport and metabolism	K04564|1|7e-74|228|gsl:Gasu_29070| superoxide dismutase, Fe-Mn family [EC:1.15.1.1]	GO:0006801//superoxide metabolic process;GO:0055114//oxidation-reduction process	GO:0046872//metal ion binding;GO:0004784//superoxide dismutase activity	-
311	EJK75665.1	hypothetical protein THAOC_02607 [Thalassiosira oceanica]	163526	0.006	1	1	0.8	0.09	0.02753	EJK75665.1	MAFYRIATMAGSVACALIALAQAAAAVQSNAEKLASNLSVTLQLGKNFGHDKVRDVIAIVFVFSSERNLSLADPQSIYLLKVCPMADWGFCFTLNLILDYNGSEDYLDSDGSWLTSGKFAKFAQSCFDSQPNVHFTYTSDKSSAVIPNTDTENLRDFVVPYTSTVRTTNDVNKPASTENRYLANKSLRVVSASDRIVPKPFRTVVSPNAQSFRISSVSLSGADSLSQLQDGVSELMSKLGIETTDYGGHPIALTLGGSLPGDIAGVDEAYIMDVKSIGTTIIATDAAGLFNGLMSFLGLLDVNDMTIKEVTVQDKPRFPYRGHQIDAARNFRSKETVLKTLDVMALYKLTLSELRISQDPNEETCLLTQLGSGPDAGEKQFYSRQDYIDILKYADARNV…	100	0	gi|397643119|gb|EJK75665.1|	hypothetical protein THAOC_02607 [Thalassiosira oceanica]	39.84	3e-145	sp|Q54468|CHB_SERMA	Chitobiase OS=Serratia marcescens GN=chb PE=1 SV=1	499	2e-155	COG3525	N-acetyl-beta-hexosaminidase	G	Carbohydrate transport and metabolism	K14004|1|2e-76|259|atr:18427102| protein transport protein SEC13	-	-	-
312	EJK73893.1	hypothetical protein THAOC_04469 [Thalassiosira oceanica]	26818.5	0.036	2	4	0.48	0.112	0.007532	EJK73893.1	MKTTLIASLLSTAAAFAPQPASRASTAVSETKADLEVIAAKANPIIKFYDPLNLSGAEFWGTSNEATIGFLREAEIKHGRVAMFAFVGYIVHANGITFPWAMQMDGTPFPKVSNAPEAWDQISDSAKLQIFAFIGFLEYWREANSGQHYMSGGKPGYFPPFDAKIIPGGALNLYDPFGLNKNMSEETKEKRLIAEINNGRAAMLGIFGFISAGKVEGSVPALSGIIPHYDGDPMAPMSESILPHFGTLN	100	5e-165	gi|397640023|gb|EJK73893.1|	hypothetical protein THAOC_04469 [Thalassiosira oceanica]	35.06	9e-21	sp|Q41094|FCPF_PHATR	Fucoxanthin-chlorophyll a-c binding protein F, chloroplastic OS=Phaeodactylum tricornutum GN=FCPF PE=3 SV=1	-	-	-	-	-	-	K08907|1|6e-12|67.0|gsl:Gasu_15230|	-	-	-
313	YP_009093502.1	ribosomal protein L4 (chloroplast) [Thalassiosira weissflogii]	24208	0.051	2	3	0.6	0.153	0.02542	YP_009093502.1	MAVQKTIEYNSFDSNEQSSSEKYNLNLTVLENSGNYLIHRDILRHQFSQKQGTVSTKTRSEVRGGGKKPWRQKGTGRARAGSSRSPLWKGGGVIFGPKPKTVTLKLNKKERNLALQTLLYNKRNNISVIANLESLITEPKTKAFCNLCNSYNVTFNEKILIIVSKKTNALKLSTQNLKNVELISASNLNTLSLLKANQILLTPLAINDIKEIYCD	100	2e-155	gi|700082704|ref|YP_009093502.1|	ribosomal protein L4 (chloroplast) [Thalassiosira weissflogii]	73.36	6e-112	sp|P49546|RK4_ODOSI	50S ribosomal protein L4, chloroplastic OS=Odontella sinensis GN=rpl4 PE=3 SV=1	202	3e-64	COG0088	Ribosomal protein L4	J	Translation, ribosomal structure and biogenesis	K02926|1|7e-47|157|ppp:PHYPADRAFT_17327| large subunit ribosomal protein L4	GO:0006412//translation	GO:0003735//structural constituent of ribosome;GO:0019843//rRNA binding	GO:0005840//ribosome;GO:0009507//chloroplast
314	EJK58980.1	hypothetical protein THAOC_20854 [Thalassiosira oceanica]	21797.9	0.069	2	4	0.68	0.156	0.03861	EJK58980.1	MMKSIAALALVGSAAAFAPAPVQQKSTALYENPLANELGAQAPLGFFDPLGACADGDKENFDRLRWVELKHGRISMLAVVGYLVTYAGVRFPGAEDIPSGFAAIDATPGMVWAQFAATTAMMEAANQDQFKGPWGTNQNSLGESPAEFKGDFRNGALDFGWDKLSPEAKMRKRAIELNNGRAAQMGILGLMVHEKLGNIDAILP	100	2e-126	gi|397605353|gb|EJK58980.1|	hypothetical protein THAOC_20854 [Thalassiosira oceanica]	54.35	8e-58	sp|Q41093|FCPE_PHATR	Fucoxanthin-chlorophyll a-c binding protein E, chloroplastic OS=Phaeodactylum tricornutum GN=FCPE PE=2 SV=1	-	-	-	-	-	-	K08907|1|5e-11|63.2|gsl:Gasu_15240|			GO:0016020//membrane;GO:0044424//intracellular part
315	EED87624.1	predicted protein [Thalassiosira pseudonana CCMP1335]	98716.3	0.008	2	2	0.49	0.082	0.003459	EED87624.1	MSLATSGGAGAGLAGGGLSAAAMAHGGPNAALATHTPPHNAQYSSIPNSSGAAAPPGTSYAALGADLLDKNQSFLNGKNVRGVSALPIVGVDLYGDGCGVGYFGPMEKEEDGGKDDPDGGEMAAMMKAMQKVKAGTLAKSIGNFNGTIGTNVILKKENDKSYKAVKKYLTKGAAEGCGGVLNEALVVDGKEINEDEENNNTVVVIPRPHLLMGARKLSEINPAAKCTFQSILPKNNKDDDDNNNNNNNSPVIDQDNSTSSISLTTIALDGNSRPKGDDYDRVAFQLRLNSKKKLMTMLPEEAVGLIIASCRKNVRDAYIEQHPESELNPQNAEDPEEEELGYMDYPPAFAIPGWACLDATLEALIDAAGGRASICGPSLHQRSIAACVGALLPPPVSAN…	100	0	gi|224012383|ref|XP_002294844.1|	predicted protein [Thalassiosira pseudonana CCMP1335]	-	-	-	-	-	-	-	-	-	-	-	-	-	-
316	EJK74033.1	hypothetical protein THAOC_04319 [Thalassiosira oceanica]	11775.6	0.094	1	1	0.52	0.165	0.02282	EJK74033.1	MARSGIAKGINKGHITEQRERAAKPSRTKGKLGKRTALCREIAREVAGLSPYERRILDMIKTGGSAADKRIYKFAKRRLGSHKRAVAKREDIKAINSKMRAKQAGA	100	1e-69	gi|397640279|gb|EJK74033.1|	hypothetical protein THAOC_04319 [Thalassiosira oceanica]	47.17	1e-26	sp|Q9LZ57|RL363_ARATH	60S ribosomal protein L36-3 OS=Arabidopsis thaliana GN=RPL36C PE=3 SV=1	-	-	-	-	-	-	K02920|1|3e-30|106|cre:CHLREDRAFT_195597| large subunit ribosomal protein L36e	GO:0006412//translation	GO:0003735//structural constituent of ribosome	GO:0022626//cytosolic ribosome;GO:0016020//membrane;GO:0009536//plastid
317	EJK50906.1	hypothetical protein THAOC_29977 [Thalassiosira oceanica]	97007.3	0.01	1	2	0.71	0.124	0.02743	EJK50906.1	MSVWRKGLASMNWRRGLKVRPLVALALLVVAVTLSATAFVPPIRHIRSAVPNGLNGIDDPIIRPALFRQTDLGYVGISVSVLRSSLSNEDVSTSRASTTPNQPPFSLPTALFLAGLAFDAYVEPPQDSSRWEKGSTGTNVAFLSTAYTRSLYKGIIEVTPIRASDLPDEDDAAESMLSGGGVDATLLVSVVEGAWKEDIEKLEKEQYHNGVLDLAGCAHIGRSSTAWSNVDENKAKRNKQRGQSGAYHVKSTWGKGGQAVWEGDPPFYLYVQDPVTARLVFTLFDEDVVGGGSPIGSSHKKIVELLPETRSKDAVSMIKGQVIENLKNSGRLADAIKVEVNPETGEEETVVDEDVVLQAITDLYSTGTTASIKMNSKPRKKDKGMQRNIGMAAGAMIAG…	100	0	gi|397578524|gb|EJK50906.1|	hypothetical protein THAOC_29977 [Thalassiosira oceanica]	28.96	2e-07	sp|Q941F1|PLA15_ARATH	Phospholipase A1-Igamma1, chloroplastic OS=Arabidopsis thaliana GN=At1g06800 PE=1 SV=2	-	-	-	-	-	-	-	GO:0044238//primary metabolic process	GO:0016787//hydrolase activity	-
318	XP_002294116.1	predicted protein [Thalassiosira pseudonana CCMP1335]	76813.7	0.04	2	6	0.51	0.202	0.03852	XP_002294116.1	MKTTACLLSLLATTAAFAPAPISRTTTSISESKADLESLATKLNPTIRFYDPLNLSEQDFWGKGNEATIAWLRQSEIKHGRIAMFAFVGYIVQSNFVFPWAQTLSGAPHPSADLVPEAQWDAVPLGAKWQIFAVISMLELWDECGGGGVMPHYTKGRQPGKYPPFKMFRDNVHFVLDLYDPFGFNKNMSAETKERRLTAELNNGRLAQLGIFGFLCADKITGSVPALNSIAIHYDGNPMIPFEAARKWREETRSTSNLTLPRVTAMRMHQRKRGPPTLGEKSVVADVLTRETGDGIGDGDVVVVRKNHFINPSFHRYFIVWLAGCICGRLSATYDGYQRKYRASVAPWASLSSPYPKLTQHLPPTDASKRLELDLSVLDLWRTNAISVFLSEKPGKLCR…	100	0	gi|224010317|ref|XP_002294116.1|	predicted protein [Thalassiosira pseudonana CCMP1335]	30.85	3e-13	sp|Q41094|FCPF_PHATR	Fucoxanthin-chlorophyll a-c binding protein F, chloroplastic OS=Phaeodactylum tricornutum GN=FCPF PE=3 SV=1	77.4	7e-13	COG4122	Predicted O-methyltransferase YrrM	R	General function prediction only	K08907|1|2e-14|76.6|gsl:Gasu_57520|	GO:0008610//lipid biosynthetic process;GO:0032259//methylation	GO:0008168//methyltransferase activity	-
319	EJK59733.1	hypothetical protein THAOC_20006 [Thalassiosira oceanica]	35430.2	0.056	1	1	1.51	0.174	0.006053	EJK59733.1	MPKRDESPQPRNSRNSLLVLPPYSSVVDIGAKGSSSHSRIMRQTISKLAFLAFSSLPSSTSFSPSCYSQPSPSSSSALHAEASASSVPAAVKPIEEGSHDELMYALGVNLARQLGDVKPLVENSDELTQLARGLIDTVVGKFDDESQRALLARRGEDLNKVIVERANAVREKIENAGKSMLEEMAKNEETATLESGVIIHPLEAGPEGFGKGVRPTAASTVKVHYHGTLPDGTVFDSSIGKDPVTFPLGGVIPGWREGLLKMSEGETAMLGIPSNMAYGEQGTPDGRIPGGAALFFKIQLIEVLSAGIGGGPQLVGADGQALKKESSGGLLGADGKPL	100	0	gi|397607569|gb|EJK59733.1|	hypothetical protein THAOC_20006 [Thalassiosira oceanica]	35.55	8e-28	sp|O08437|FKBA_AERHY	FKBP-type peptidyl-prolyl cis-trans isomerase FkpA OS=Aeromonas hydrophila GN=fkpA PE=3 SV=1	125	1e-32	COG0545	FKBP-type peptidyl-prolyl cis-trans isomerase	O	Posttranslational modification, protein turnover, chaperones	K09569|1|2e-22|94.4|smo:SELMODRAFT_96017| FK506-binding protein 2 [EC:5.2.1.8]	GO:0006457//protein folding;GO:0000413//protein peptidyl-prolyl isomerization	GO:0003755//peptidyl-prolyl cis-trans isomerase activity	-
320	XP_002288953.1	predicted protein [Thalassiosira pseudonana CCMP1335]	61959.4	0.035	2	11	0.55	0.18	0.0307	XP_002288953.1	MRISLAILCLVLGGSEVALARSSGRPSSSSAARRGGGSSSRGGGSSRPSSSSSSGSKRRRDPIDDYEEEEDIVVGFDLEEDIIDDGGDGDDYDDYSDEDVASSPRGRSRGPPPSSRGGRPPAAGAGRRRPTPRDEYDEYDEDEFAPRGSGRGASSRPSGPSQRGGSRRGPPPSRGGRPGENRMVSYNNRGGRRGPPPPPVPSTFTRGLSAIRDRMPDPNTVKETMLSAANAAQEKTSQFSSNIYREVKGLTSSELEQVMLKATRPDETPVKTKHVERLVGVTYQISGKYDIYDAVLRKLWNKMAEKDIRTKLKSVAFLSRYAHYVLTRAQTFGGVFNEISLAGMPPPPTPPSKKSRSKRGAAAVATKPKNPPLCEEHLKFAQMVLKAGLACTLHDGEES…	100	0	gi|223998560|ref|XP_002288953.1|	predicted protein [Thalassiosira pseudonana CCMP1335]	-	-	-	-	-	-	-	-	-	-	-	-	-	-
321	EJK56326.1	hypothetical protein THAOC_23816 [Thalassiosira oceanica]	118536	0.021	1	1	0.52	0.186	0.03051	EJK56326.1	MTGYETGHLATRLYEDSPHQREVEVGGRPHPFIPLSSDLPSVCLGKSLWSLVWIDPLCHWSREEAPLLSKQVRVDFTGRPRRKWEREMYERLKQMIEGGSPLTAEQSKVYERVKRQDERQKKRRRDDWAEYKRLKQMRVKRRDERQKKRRRDDWAEYNRLKQMVKGGTPLTAEQSKVYDSIKRQDERENKRRRDERAEYKRRFENITHRFMAGDIDAKCLTVCPNAPGAMRLNKLLKNGELYSITTPSGRLGIVPRKAYPRGARIGKICKDSALIGSVGAGDRIVAIDNQDVSNLSMAQVIKILVDKSGQERHLVLKRRVLLTDVLDHMARHELAVELKARNLHVSGDKFMMKERIWNSVAHYGGCLLGRDFDNNGGNKPPPIDTAAAHLSHKCGRGRA…	100	0	gi|397594775|gb|EJK56326.1|	hypothetical protein THAOC_23816 [Thalassiosira oceanica]	43.73	4e-157	sp|Q940S0|TMN2_ARATH	Transmembrane 9 superfamily member 2 OS=Arabidopsis thaliana GN=TMN2 PE=2 SV=1	-	-	-	-	-	-	K17085|1|2e-160|489|ppp:PHYPADRAFT_216379| transmembrane 9 superfamily member 1!K17087|2|5e-159|486|olu:OSTLU_29586| transmembrane 9 superfamily member 3			GO:0016020//membrane
322	EED96710.1	predicted protein [Thalassiosira pseudonana CCMP1335]	30142.4	0.06	1	2	0.36	0.248	0.04479	EED96710.1	MSEVRKPTLIESMACGGAAAAFAVNFTHPIELVKTRMQVSGAGIGETVAGVMKNGGVGAFWKGLPFGWGRELSYTSIKLGAYAPVRNAIGAGDPDASIGMKFLAGAITGGVGSVVGNPFDVLKTLAQTNTTGDSMGTLVANLYRDQGIGGFYRGVEVNIMRACVLNATKMGVYDATKGSIVQYTGWNRKDVKTSFGAAFVAGFFMTVTVAPWDMLRTKLMNQPTDKKIYNGFVDCAKKTIQADGVLSLWRGFVPIWARFAPQATLQLLSIEVIYNAMGFKGI	100	0	gi|223994771|ref|XP_002287069.1|	predicted protein [Thalassiosira pseudonana CCMP1335]	28.89	3e-42	sp|B0G143|UCPB_DICDI	Mitochondrial substrate carrier family protein ucpB OS=Dictyostelium discoideum GN=ucpB PE=3 SV=1	-	-	-	-	-	-	K15106|1|2e-46|160|smo:SELMODRAFT_233107| solute carrier family 25 (mitochondrial carrier), member 14/30!K15104|3|1e-35|132|smo:SELMODRAFT_168360| solute carrier family 25 (mitochondrial oxoglutarate transporter), member 11!K15112|4|1e-34|130|sot:102581449| solute carrier family 25 (mitochondrial uncoupling protein), member 27	GO:0006810//transport		GO:0016021//integral component of membrane
323	EJK75924.1	hypothetical protein THAOC_02338 [Thalassiosira oceanica]	42609.5	0.021	1	1	0.7	0.151	0.0425	EJK75924.1	MLFVDKHRPSRLSQLNYHDTLTQRLTSLAADPGGLPHLLLYGPSGAGKKTRVMALLREVFGCGAERLRLEKRTFTTPTKRQVEINMIQSNYHIEMAPGDAGLNDRYVIQDVIKEMAANKNIASVVTSKDGNDGEDDGHAKKKAAKASYKVVVLVEVDKLTRQAQAALRRTMEKYSSSCRLILCCNNPSKVIDPVRSRCLGIRVAAPSDDEIASVLKTVSRKENIKLADELAINIARLSSRNLRRALLMLESCYVTTRDESPRELKADTPVPRTDWERYIAMLATGIVKEQSPKSLMAAREKLYELLINCIPAQIILKTLLMELLPVLDDTIKAEVVHWAAFYEHRIALGSKEIFHLEAFIAKFMALYKKYLNDLFG	100	0	gi|397643532|gb|EJK75924.1|	hypothetical protein THAOC_02338 [Thalassiosira oceanica]	52.42	2e-112	sp|Q2TBV1|RFC3_BOVIN	Replication factor C subunit 3 OS=Bos taurus GN=RFC3 PE=2 SV=1	134	2e-34	COG0470	DNA polymerase III, delta prime subunit	L	Replication, recombination and repair	K10756|1|2e-112|335|smo:SELMODRAFT_234901| replication factor C subunit 3/5	GO:0006260//DNA replication	GO:0003677//DNA binding	-
324	EJK64041.1	hypothetical protein THAOC_15265 [Thalassiosira oceanica]	34443.7	0.129	1	1	0.59	0.187	0.03915	EJK64041.1	MCIPCCVCVSTSEVVVVERLGKFDRLLPPGLGFVVCPCTFDRLCLDLRIRTQSALGSCRGQKLTTLLTGEQSAGTVSFRVQQLDVRVETKTKDNVFVSTVVSVQYQVIREKAYQAYYSLTNTQQQITAHVYDVMRSQLPTLELDAVFEAKEDLALAVKNALQATMSDYGYQILQALITDIDPDIRVKQAMNEINSAKRLKFAVAEKAEGQKILQVKSAEAEAEAKYLSGVGVAKQRKAIVDGLRTSIVDFSDGVKGATSKDVMDLLLLTQYFDCVRDVGSASHCKTTFVPSGGGNDMRNSLLQADAAKLS	100	0	gi|397616582|gb|EJK64041.1|	hypothetical protein THAOC_15265 [Thalassiosira oceanica]	48.81	2e-96	sp|Q6K550|HIRL2_ORYSJ	Hypersensitive-induced response protein-like protein 2 OS=Oryza sativa subsp. japonica GN=HIRL2 PE=3 SV=1	269	2e-87	COG0330	Regulator of protease activity HflC, stomatin/prohibitin superfamily	O	Posttranslational modification, protein turnover, chaperones	-			GO:0016020//membrane
325	AIR76108.1	ribosomal protein L1 (chloroplast) [Thalassiosira weissflogii]	25287.2	0.117	1	1	0.72	0.132	0.03314	AIR76108.1	MRKLSRRQNENLKKTKNVVHSSLEEAINLLQETATAKFIESVELHANLNIDPKYADQQLRTTVTLPHGVGKSVRIAVLTNEANFNEATEAGADIVGSQDLIDDISQGNINFDLLIATPDMMPKLAKLGRVLGPKGLMPSPKSGTVSTTLTETLSDFKKGKFEYKADKTGIVHVSFGKANFSKSQLMENLSSLYKSIEQNRPSGVKGKYFKSLFICSSMGPSIQLDLNVFD	100	6e-170	gi|700082637|ref|YP_009093435.1|	ribosomal protein L1 (chloroplast) [Thalassiosira weissflogii]	91.74	6e-159	sp|A0T0Q6|RK1_THAPS	50S ribosomal protein L1, chloroplastic OS=Thalassiosira pseudonana GN=rpl1 PE=3 SV=1	293	9e-100	COG0081	Ribosomal protein L1	J	Translation, ribosomal structure and biogenesis	K02863|1|3e-90|273|nnu:104606334| large subunit ribosomal protein L1	GO:0006412//translation	GO:0003735//structural constituent of ribosome;GO:0019843//rRNA binding	GO:0015934//large ribosomal subunit;GO:0009507//chloroplast
326	EED86938.1	hypothetical protein THAPSDRAFT_264387, partial [Thalassiosira pseudonana CCMP1335]	45691.9	0.021	2	2	0.69	0.1	0.01398	EED86938.1	RSLLKFYFPCLALWISGPLLSLVDTTVGAAGSAAQLAALGPATTFIDGSLYLFAFLNVATTNLYASALATAAKTSLYSGIGLMVFLLAVARPLIALYIGEWYIRLYCILSSPGLLDAAHSYVKIRALSMPTSLLGGVLQAALLGAKDSVTPLVSILYSTIVNVCGDYLLVNRFHMGLKGAAIATLCAQLAGTVAMIGPARRELLSKGSSLGLLPRWITKRAPDEINAKTFLKFAAPVLTLILGKISAFGFMTNAAAGLPGQPATLAAHQIALSLFFFASPFLEVISQLSQAYLPSYGAESNRLVFRLEKVGILVGALMAGVVGGIIAFLPGIVTKDATVQTAVKPLAATLAAGVALTAPVAVSEGTLIARKELSYLAGVYFVSTALLPPVLRRIRSGGG…	100	0	gi|224014148|ref|XP_002296737.1|	hypothetical protein THAPSDRAFT_264387 [Thalassiosira pseudonana CCMP1335]	29.12	8e-21	sp|Q945F0|DTX47_ARATH	Protein DETOXIFICATION 47, chloroplastic OS=Arabidopsis thaliana GN=DTX47 PE=2 SV=1	81.6	5e-15	COG0534	Na+-driven multidrug efflux pump	V	Defense mechanisms	-	GO:0051716//cellular response to stimulus;GO:0042221//response to chemical;GO:0051707//response to other organism;GO:0046394//carboxylic acid biosynthetic process;GO:0044238//primary metabolic process;GO:0032787//monocarboxylic acid metabolic process;GO:0050794//regulation of cellular process;GO:1901360//organic cyclic compound metabolic process;GO:0055085//transmembrane transport;GO:0006952//def…	GO:0022857//transmembrane transporter activity	GO:0016020//membrane
327	EED87666.1	predicted protein [Thalassiosira pseudonana CCMP1335]	26043.1	0.075	1	2	0.66	0.114	0.01545	EED87666.1	MKLSLLSVLIGSAVGFTATSSARTSVSTKAAIDDLKSIAEKSNPVLKFYDPLELSSTTIWDNTNDQTIAFLRHSEIKHGRVAMAAFVGYIVQSNGIHFPWPMSFDGTPFPYAAGSPPEQWDALSDEAKWQIILFIGFLEWFSEATGTHYMRGGVPGAYPKFSDSDVIPHPVPLNLFDPFGFSEGKSAEAKANGLIKELNNGRLAMIGIMGFISEQRVEGSVPLLKGLVAHYDGETMAPFA	100	4e-165	gi|224012467|ref|XP_002294886.1|	predicted protein [Thalassiosira pseudonana CCMP1335]	32.11	5e-17	sp|Q42395|FCP_ODOSI	Fucoxanthin-chlorophyll a-c binding protein, chloroplastic OS=Odontella sinensis GN=FCPA PE=2 SV=1	-	-	-	-	-	-	K08907|1|1e-12|68.2|gsl:Gasu_15240| !K08910|5|4e-10|62.0|cre:CHLREDRAFT_186299|	-	-	-
328	EJK75009.1	hypothetical protein THAOC_03280 [Thalassiosira oceanica]	50800.9	0.086	2	4	0.75	0.1	0.0216	EJK75009.1	MGCGGSAPAEAVSAPASNGAGNAIKAGSAYESRNIDQEMERAKAEEEGKIKMLLLGAGESGKSTIFKQMRLLYGTERSDDDLRMYGVVARSNIVVAVRKLCSHLRNLGLEEELDRESRENEELEEGDHSSMTCRQAYDELMAYLVDNTATASAQDPMADMGGKKDWVGQSPRAGLAANNDAKQFLAHHESIRILWQSNTMKQVWAKRSAVNIIDSHKDYLNDISRIASPDYRPTTQDVLIARVRTTQVVMEKYRIDNIDFEMYDVGGQRSERRKWIDCFDQVTAVIFVAALSEYDQTLAEAKRTNRMVEALELFRSVCNNRAFSNTSIMLFLNKKDIFAEKILYSDIAAQRPFCDYAGPTKDFDHGILYFIQKFKDCLIDDDFNDSFIHVTCATDTNNM…	100	0	gi|397642070|gb|EJK75009.1|	hypothetical protein THAOC_03280 [Thalassiosira oceanica]	33.5	2e-69	sp|Q18434|GPA17_CAEEL	Guanine nucleotide-binding protein alpha-17 subunit OS=Caenorhabditis elegans GN=odr-3 PE=1 SV=1	-	-	-	-	-	-	K19729|1|3e-52|183|cmo:103493708| guanine nucleotide-binding protein G(t) subunit alpha 3	GO:0007186//G-protein coupled receptor signaling pathway	GO:0004871//signal transducer activity;GO:0005525//GTP binding	-
329	EED92232.1	predicted protein, partial [Thalassiosira pseudonana CCMP1335]	102235	0.055	2	8	0.61	0.089	0.00629	EED92232.1	MNENSPWHTMSIDGTIKQMGLKEDLPKAGLSTDEAASRLTKYGPNQMTEKVKTTLLQRIWHQINNVLVYVLITVAVVSLIQAVTTNNSNTRFTAWFQVALIVSVITLNTWIGIYQEGNAEKAADALKNMLSTDARVIRGGKEVMIPAGDIVPGDVCLLGLGDKIPADLRLISVSNLATGEAALTGESVPIDKVRMSVANPDQVPLGDRKNMAYSATLVAQGSGIGIAISTGDFTQIGTINRLVNNTETIKTDVLKQIDMVSKYLFIAICTMCLATFFVAFFYSDNYKKDALGSINIALTCAVAMVPEGLEAIVTLTYSYAVKVMASQNAIVRALPAVETLGSVTVICSDKTGTLTQNIMSLTAFVTSNARYKNNNPEGVKPAHPDDNFPVSNGESPTKD…	100	0	gi|224000728|ref|XP_002290036.1|	cation transporting ATPase [Thalassiosira pseudonana CCMP1335]	37.5	4e-164	sp|P9WPS9|CTPF_MYCTU	Probable cation-transporting ATPase F OS=Mycobacterium tuberculosis (strain ATCC 25618 / H37Rv) GN=ctpF PE=1 SV=1	623	0	COG0474	Magnesium-transporting ATPase (P-type)	P	Inorganic ion transport and metabolism	K01537|1|3e-104|352|cam:101512366| Ca2+-transporting ATPase [EC:3.6.3.8]	GO:0008152//metabolic process;GO:0006812//cation transport	GO:0046872//metal ion binding;GO:0005524//ATP binding;GO:0008900//hydrogen:potassium-exchanging ATPase activity	GO:0016021//integral component of membrane
330	EJK74655.1	hypothetical protein THAOC_03655 [Thalassiosira oceanica]	25902.6	0.085	1	1	0.78	0.119	0.04601	EJK74655.1	MKIVAFVCSLLVAGASTFSKFHCNLPSGLGPSFTGVRHARSRPTPPTEFATPSISPRAISDQRTCAQGPRSKLHACHSNLVTSPKGVGSVSSFTGTHISTVMEPAARAHHSKSSSLEMMRHRKRVPKLGKPADQRKALLRALTTEIIRHGRIKTTAVRAKAVRKHVDHMVELGKRGDLHARRQALGWIYDKDLVHALFEAAPERYGERNGGYTRVLRTMPRQGDNAKMAVIELV	100	3e-173	gi|397641452|gb|EJK74655.1|	hypothetical protein THAOC_03655 [Thalassiosira oceanica]	74.14	2e-56	sp|B8HMS9|RL17_CYAP4	50S ribosomal protein L17 OS=Cyanothece sp. (strain PCC 7425 / ATCC 29141) GN=rplQ PE=3 SV=1	183	9e-58	COG0203	Ribosomal protein L17	J	Translation, ribosomal structure and biogenesis	K02879|1|6e-61|195|ccp:CHC_T00003232001| large subunit ribosomal protein L17	GO:0006412//translation	GO:0003735//structural constituent of ribosome	GO:0005840//ribosome;GO:0009507//chloroplast
331	EJK63338.1	hypothetical protein THAOC_16004, partial [Thalassiosira oceanica]	68502.6	0.019	1	1	0.65	0.087	0.007212	EJK63338.1	FAVRTARPAVRLRSGPHDLRSGPQQDSNPSSFSRSDQQGWLCDFVRTEALATRDRANYLIRPPTLSQLTYLVPPHGRIEYPQDKIEAGQKIKPKDSTSKISEPRALFDMDMLSIALVALTSIAGGIFLTWKLLLLLAPGWYSKMIGGNHVSVDDFVGGPPSAKSALKSVLMNWLSVGSRVAKREGYDLKTEDSDKVPGLKVTSRDEKGTKSNGGAGKPPPVIVGTIRMGFGHHRIAYAATSWGLGGDVASKDRDIWFHDFLNIESEEAQMIKDTDKLYSKGSRLASELGGTAEKIWGSITKSGDEDSLRVTYQTSEHLVPLIAGLDRDSPIIASHSLVACAAVAAGFKNVINLVIDNHAQWFVVAPGALNLVQGPSNYHSLLQMGVPEKDLALAGHWIP…	100	0	gi|397615289|gb|EJK63338.1|	hypothetical protein THAOC_16004, partial [Thalassiosira oceanica]	-	-	-	-	-	-	-	-	-	-	-	-	-	-
332	XP_002292429.1	predicted protein [Thalassiosira pseudonana CCMP1335]	35485.8	0.024	1	5	0.81	0.102	0.04372	XP_002292429.1	MTVPSSLIARSSRRLISSAGRRSISSLTSDYNFRSHGVSPTSNSTHQRHFASSTSAIEPRRDALTSSDGVVGIPIDFDIASSIEGKESQIVTIRLEPNQVLRAESGAMMYMTSGVSMNTTTGGGMSAGFQRFLTGQNVFISDYTYDGSNGPFGFVALGSDFPSKIVRLSLDEYGGKVICQKGALLCASHTVDIQVEFTKKFSTGFFGGEGFVLQGLTGTGDVLVKAGGTLIRKDLKEGESLRVSSGCLVGFQQGVEYDVAMVPGFKNVLFGGEGLFLTTLKGPGTVWLQGMPPQRMISEIARRVPSGGGIGLAVPIPGMGGGGGSEGGGEGGESTGSTSG	100	0	gi|224006938|ref|XP_002292429.1|	predicted protein [Thalassiosira pseudonana CCMP1335]	-	-	-	-	238	5e-76	COG2013	Uncharacterized conserved protein, AIM24 family	S	Function unknown	-	-	-	-
333	EED96070.1	RL15, ribosomal protein 15 60S large ribosomal subunit [Thalassiosira pseudonana CCMP1335]	24337	0.112	1	2	0.53	0.154	0.01994	EED96070.1	MGCYKYMEELWRHKQSDALRFLLRVRAWEYRQRPKITKVNRPTRTDKAHRLGYKAKQGYTVVRCGIRRGGRKRPNHRGMVFGKPKNQGISQIKFQRNLQSVAEEKVGRKYGNMRVLNSYWVNQDATMKYYEVILVDPSHTKIRNDPRINWIVNPVHKHRECRGLTSAGRKARGLRKSGHRANGIKGGSARAAWINRNTQRLKRYR	100	5e-151	gi|223993491|ref|XP_002286429.1|	RL15, ribosomal protein 15 60S large ribosomal subunit [Thalassiosira pseudonana CCMP1335]	65.85	8e-93	sp|O82528|RL15_PETHY	60S ribosomal protein L15 OS=Petunia hybrida GN=RPL15 PE=2 SV=1	174	1e-53	COG1632	Ribosomal protein L15E	J	Translation, ribosomal structure and biogenesis	K02877|1|6e-95|278|thj:104813217| large subunit ribosomal protein L15e	GO:0006412//translation	GO:0003735//structural constituent of ribosome	GO:0022626//cytosolic ribosome;GO:0016020//membrane;GO:0044446//intracellular organelle part
334	XP_002287160.1	26S proteasome ATPase regulatory subunit 6 [Thalassiosira pseudonana CCMP1335]	45188.3	0.191	2	4	0.54	0.202	0.03985	XP_002287160.1	MATATSPSLTSSNNNGGTGMDKYYFSKISALSSTISTRTSDLQRLKARRNELNAKVRMLREELYHLQEPGSYVGEVIKQMGQKKVLVKINPEGKYVVDIDKDIDINDLKPNTRVALRNDSYTLHKILPTKVDPLVSLMKVEAVPDSTYDMIGGLEKQVMEIKEVIELPIKHPELFESLGVAQPKGVLLYGPPGTGKTLLARAVAHHTDCTFIRVSGAELVQKYIGEGSRMVRELFIMAREASPSIIFMDEIDSIGQSRGGGGGDSEVQRTMLELLNQLDGFEPAQNIKVIMATNRIDILDSALLRPGRIDRKIEFPNPNAENRMAIMKIHSSKMNLLRNIDLHTIAEKMMNASGAECKAVCTEAGMFALRERRVHVTQEDFEMAVSKVMKKEGESNMSL…	100	0	gi|223994953|ref|XP_002287160.1|	26S proteasome ATPase regulatory subunit 6 [Thalassiosira pseudonana CCMP1335]	78.01	0	sp|Q9C5U3|PRS8A_ARATH	26S proteasome regulatory subunit 8 homolog A OS=Arabidopsis thaliana GN=RPT6A PE=1 SV=1	363	5e-122	COG1222	ATP-dependent 26S proteasome regulatory subunit	O	Posttranslational modification, protein turnover, chaperones	K03066|1|0.0|621|nnu:104592341| 26S proteasome regulatory subunit T6	GO:0030163//protein catabolic process;GO:0006508//proteolysis	GO:0008233//peptidase activity;GO:0005524//ATP binding;GO:0017111//nucleoside-triphosphatase activity	GO:0005737//cytoplasm;GO:0000502//proteasome complex
335	EJK45790.1	hypothetical protein THAOC_35575 [Thalassiosira oceanica]	29165.1	0.323	1	1	0.74	0.034	0.0009284	EJK45790.1	MMATRAKMSTKRKFVADGVFYAELNELLTRELAEDGYAGVEVRTTPHRTEIIIRATKTQNVLGEKGQRIRELTSVVQKRFDFAEGAVELYAERVQNRGLCAQAQAESLKFKLLAGLAVRRACYGVVRFVMEASAKGCEVIVSGKLRGQRAKAMKFGDGYMIKTGHAGQVYTDTAVRHVAMRQGMIGIKVSIMLPHDPKGQIGPKIPLDDVVTILEPKEEPSPEEILQQQQAAEAAAAAASAAALMAQQQEMLQQQAPVDPNVAAGY	100	2e-158	gi|397567805|gb|EJK45790.1|	hypothetical protein THAOC_35575 [Thalassiosira oceanica]	74.65	4e-115	sp|P47835|RS32_XENLA	40S ribosomal protein S3-B OS=Xenopus laevis GN=rps3-b PE=2 SV=1	128	9e-35	COG0092	Ribosomal protein S3	J	Translation, ribosomal structure and biogenesis	K02985|1|5e-121|348|sbi:SORBI_02g038990| small subunit ribosomal protein S3e	GO:0006412//translation;GO:0009651//response to salt stress	GO:0003735//structural constituent of ribosome;GO:0003723//RNA binding	GO:0005730//nucleolus;GO:0022626//cytosolic ribosome;GO:0005773//vacuole;GO:0005886//plasma membrane;GO:0015935//small ribosomal subunit;GO:0009507//chloroplast
336	EJK74044.1	hypothetical protein THAOC_04305 [Thalassiosira oceanica]	22241.7	0.194	1	5	0.72	0.097	0.01606	EJK74044.1	MLSSTVRRAATTMGRRTMATDAAHRPPLDLYGLNARYANATFVAASKSNNLETVESELLAIKNSAENSKEFASFLENPLISRDDKTKTVTDLLSGKTTPVTTNLMTTLAGNARLNNIVGITDDYIKLMKAKRGEVEATIISAEPLNKTQEKAVSEAMKTQFPKGAKVVLKTEVNPSILGGLQIQIGDKFLDLSVGSRIEEVSRTAV	100	4e-121	gi|397640302|gb|EJK74044.1|	hypothetical protein THAOC_04305 [Thalassiosira oceanica]	39.44	2e-33	sp|Q5RD23|ATPO_PONAB	ATP synthase subunit O, mitochondrial OS=Pongo abelii GN=ATP5O PE=2 SV=1	99	2e-24	COG0712	FoF1-type ATP synthase, delta subunit	C	Energy production and conversion	K02137|1|1e-30|114|bpg:Bathy03g02500| F-type H+-transporting ATPase subunit O	GO:0042777//plasma membrane ATP synthesis coupled proton transport	GO:0046933//proton-transporting ATP synthase activity, rotational mechanism;GO:0016787//hydrolase activity	GO:0005886//plasma membrane
337	EJK46404.1	hypothetical protein THAOC_34927 [Thalassiosira oceanica]	27781	0.051	1	3	1.45	0.332	0.05601	EJK46404.1	MAGFSQALLLAVVAGTSSAFLQVGRTTLHQSSSSLSSTAVTEELHKQCTLDGKTIRGPITPLGNFVLVRTKDSLDATDGGILLPDQSKERPTEGEVVAAGPGKLHPHTGVRIVNPVSTGDSVLFGKFDGHDMEYNNEPVTMIRDDDVLLHYKGVRMTMENVSPCRDYVLVELTKQKAETSSGIVVAESVMKEYEPCEGKVIKVGEGRMTSKGEFSDSPVSVGDRVKFKDYAGNSVKIEGVECSLVRMVDILCALKP	100	0	gi|397568880|gb|EJK46404.1|	hypothetical protein THAOC_34927 [Thalassiosira oceanica]	31.66	1e-25	sp|O65282|CH20_ARATH	20 kDa chaperonin, chloroplastic OS=Arabidopsis thaliana GN=CPN20 PE=1 SV=2	82	2e-18	COG0234	Co-chaperonin GroES (HSP10)	O	Posttranslational modification, protein turnover, chaperones	K04078|1|9e-39|138|ccp:CHC_T00005425001| chaperonin GroES	GO:0006457//protein folding		GO:0005737//cytoplasm
338	EJK74706.1	hypothetical protein THAOC_03602 [Thalassiosira oceanica]	18855.4	0.052	1	2	0.56	0.141	0.01787	EJK74706.1	MATAAAAFAPVQQQAGSHVALHATASKAAPTALTTSKVDSTGNNLAVKNFLSSAENARLLSKVASSGLLSKASAAGITLSKVEPLIIFAAEKGLLDEVLILTEAAGPDIIPLLPTVVDLAPQALPLLAIALDIPPAALSLASLASFAGAAALVGTVPDDTVIEVAAQTLGAVLLGTAGVAAGVGAGVLGKVKSL	100	7e-51	gi|397641542|gb|EJK74706.1|	hypothetical protein THAOC_03602 [Thalassiosira oceanica]	-	-	-	-	-	-	-	-	-	-	-	-	-	-
339	BAN33715.1	elongation factor 1alpha, partial [Detonula confervacea]	46003.4	0.067	1	1	0.66	0.039	0.000737	BAN33715.1	TTGHLIYKCGGIDKKTIDKYEREANELGKSSFKFAWVLDNLKAERERGITIDITLWKFQSQKYDFTVIDAPGHRDFIKNTITGTSQADVAVMVVDASQGGFEAGIAREGQTREHALLAYTLGVKQMIVAVNKMDDKTVNFSEKRYEDTKSEVASYLKKVGYKPAKVAFVPISGWEGDNMTEKSANMSWYSGPTLLDALDNVTPPKRPVDKSLRIPIQDVYKIGGIGTVPVGRVETGIMKPEITAQFAPSGIQAEVKSCEVHHENLLEVGPGTNVGFNVKNVAVKDIRRGDVASDANDSPATGVSSFEAQVIVMNHPGKITQGYCPVIDCHTAHVACSFTNIKEKMDRRTGKVVEQNPEFIQNGDAAIVTMEPTKALCVESFAEYPPLGRFAIRDMRQTV…	100	0	gi|508737304|dbj|BAN33715.1|	elongation factor 1alpha, partial [Detonula confervacea]	69.68	0	sp|Q04634|EF1A_TETPY	Elongation factor 1-alpha OS=Tetrahymena pyriformis PE=2 SV=1	487	4e-170	COG5256	Translation elongation factor EF-1alpha (GTPase)	J	Translation, ribosomal structure and biogenesis	K03231|1|0.0|611|smo:SELMODRAFT_169717| elongation factor 1-alpha	GO:0006414//translational elongation;GO:0006184//GTP catabolic process	GO:0003746//translation elongation factor activity;GO:0003924//GTPase activity;GO:0005525//GTP binding	GO:0005737//cytoplasm
340	YP_874553.1	cytochrome b559 beta chain (chloroplast) [Thalassiosira pseudonana]	4888.62	0.326	1	1	0.85	0.174	0.1817	YP_874553.1	MTKNINQPVAYPIFTFRWLAVHGLAIPTVFFLGGITAMQFIQR	100	1e-24	gi|118411159|ref|YP_874553.1|	cytochrome b559 beta chain [Thalassiosira pseudonana]	100	2e-25	sp|A0T0U1|PSBF_THAPS	Cytochrome b559 subunit beta OS=Thalassiosira pseudonana GN=psbF PE=3 SV=1	-	-	-	-	-	-	K02708|1|2e-20|77.8|ccp:CHC_1165|	GO:0009767//photosynthetic electron transport chain	GO:0009055//electron carrier activity;GO:0005506//iron ion binding;GO:0020037//heme binding	GO:0009539//photosystem II reaction center;GO:0016021//integral component of membrane;GO:0009535//chloroplast thylakoid membrane
341	XP_002286571.1	predicted protein [Thalassiosira pseudonana CCMP1335]	22439.4	0.057	1	1	1.19	0.079	0.01298	XP_002286571.1	MKIVLALVAASSVSAFAPQSNGRQSVAMQAENSRREALSTIAAATAAILPAAANAAAGESPRFSVFGVIGDGTSYSEGAAYGSDQSAETYSPYSVYGKVGSKDALFEAGNAGEIARKKGYIVESQKRLKNLPGYVEKKQWFNVKDELTRYMYETRGAVRGLAQTPEQKKLAKAFFQAIEEASLQATLKNGDKCAAASADSIKLLDQFYASL	100	2e-123	gi|223993775|ref|XP_002286571.1|	predicted protein [Thalassiosira pseudonana CCMP1335]	-	-	-	-	-	-	-	-	-	-	K08901|1|2e-08|56.2|gsl:Gasu_43120| photosystem II oxygen-evolving enhancer protein 3	GO:0015979//photosynthesis	GO:0005509//calcium ion binding	GO:0019898//extrinsic component of membrane;GO:0009654//photosystem II oxygen evolving complex
342	ADB27549.1	photosystem I P700 chlorophyll a apoprotein A2 (chloroplast) [Thalassiosira oceanica CCMP1005]	82157.9	0.05	1	3	0.46	0.13	0.01079	ADB27549.1	MATKFPKFSQALAQDPATRRIWYGIATAHDLEAHDGMTEENLYQKIFASHFGHLAIIFLWTAGNLFHVAWQGNFEKWVSNPLKTRPIAHAIWDPHFGEKALKAFSKGNTYPVNISFSGLYQWWYTIGFRTNQELYRASIGVLLLASVLLIAGWLHLQPKFRPSLSWFKNNESRLNHHLSGLLGFSSLAWTGHIVHVAIPASRGVHVGWDNFLTTPPHPAGLTPFFTGNWTVYAENPDTAEHAFNTADGAGTAILTFLGGFHPQTQSLWLTDIAHHHLAIAVVFIVAGHMYRTNFGIGHNMKEILDAHRPPGGRLGAGHVGLFETITNSLHMQLGLALACLGVATSLTAQHMYALTPYAYLSKDFTTEAALYTHHQYIAGFLMVGAFAHGAIFFVRDYDP…	100	0	gi|315320539|ref|YP_004072596.1|	photosystem I P700 chlorophyll a apoprotein A2 [Thalassiosira oceanica CCMP1005]	95.77	0	sp|A0T0M9|PSAB_THAPS	Photosystem I P700 chlorophyll a apoprotein A2 OS=Thalassiosira pseudonana GN=psaB PE=3 SV=1	1085	0	COG2885	Outer membrane protein OmpA and related peptidoglycan-associated (lipo)proteins	M	Cell wall/membrane/envelope biogenesis	K02690|1|0.0|1237|cme:CymeCp113|	GO:0018298//protein-chromophore linkage;GO:0015979//photosynthesis;GO:0022900//electron transport chain	GO:0016491//oxidoreductase activity;GO:0009055//electron carrier activity;GO:0000287//magnesium ion binding;GO:0016168//chlorophyll binding;GO:0051539//4 iron, 4 sulfur cluster binding	GO:0016021//integral component of membrane;GO:0009522//photosystem I;GO:0009535//chloroplast thylakoid membrane
343	AIR75477.1	photosystem I subunit VII (chloroplast) [Cyclotella sp. L04_2]	9287.28	0.593	2	2	1.08	0.169	0.4672	AIR75477.1	MSHTVKIYDTCIGCTQCVRACPTDVLEMVPWDGCKSGQIASSPRVEDCVGCKRCETACPTDFLSVRVYLGAETTRSLGLAY	100	3e-54	gi|118411182|ref|YP_874576.1|	photosystem I iron-sulfur center [Thalassiosira pseudonana]	100	6e-55	sp|A0T0W4|PSAC_THAPS	Photosystem I iron-sulfur center OS=Thalassiosira pseudonana GN=psaC PE=3 SV=1	163	5e-53	COG1143	Formate hydrogenlyase subunit 6/NADH:ubiquinone oxidoreductase 23 kD subunit (chain I)	C	Energy production and conversion	K02691|1|1e-51|159|cvr:ChvaP_p026|	GO:0009773//photosynthetic electron transport in photosystem I	GO:0046872//metal ion binding;GO:0016491//oxidoreductase activity;GO:0009055//electron carrier activity;GO:0051539//4 iron, 4 sulfur cluster binding	GO:0009522//photosystem I;GO:0009535//chloroplast thylakoid membrane
344	AIR75605.1	photosystem I subunit IX (chloroplast) [Cyclotella sp. WC03_2]	4845.45	0.244	1	4	0.83	0.262	0.2537	AIR75605.1	MNDFQKYLSTAPVLLTLWMTFTAGFIIEINRFFPDMLGLYF	100	5e-23	gi|700658202|ref|YP_009093207.1|	photosystem I subunit IX (chloroplast) [Roundia cardiophora]	97.56	1e-23	sp|A0T0V1|PSAJ_THAPS	Photosystem I reaction center subunit IX OS=Thalassiosira pseudonana GN=psaJ PE=3 SV=1	-	-	-	-	-	-	K02697|1|7e-13|58.5|cre:ChreCp061|	GO:0015979//photosynthesis		GO:0016021//integral component of membrane;GO:0009522//photosystem I;GO:0009535//chloroplast thylakoid membrane
345	XP_002296054.1	cytochrome C peroxidase, partial [Thalassiosira pseudonana CCMP1335]	29083.5	0.071	1	1	1.43	0.2	0.0153	XP_002296054.1	KAVASDIASIVKDDPDKGPTLVRLAWHSSGTYDKMSKDGGSGGGTIRFREELAHGGNAGLGSTAVVWLEDVKKKYGDSLSYADLYTLGGVVAIKELGGPTIKWSSGRVDALDPSAVTPDGRLPNADSGPAGSDPSDAAHLRTIFNRMGFNDQEIVALSGAHALGRCRPSASGYDGPWTPLPTTFNNLYFSLLNQIKWAKRDWSGPFQYEDDGKKLMMLPTDLVLIQDAEFKKYVDLYAGDQNKFFSDFSKAFNKLEELGTTGLVATQWS	100	0	gi|224004806|ref|XP_002296054.1|	cytochrome C peroxidase [Thalassiosira pseudonana CCMP1335]	56.22	7e-86	sp|P0CP54|CCPR_CRYNJ	Cytochrome c peroxidase, mitochondrial OS=Cryptococcus neoformans var. neoformans serotype D (strain JEC21 / ATCC MYA-565) GN=CCP1 PE=3 SV=1	115	3e-27	COG0376	Catalase (peroxidase I)	P	Inorganic ion transport and metabolism	K00428|1|1e-107|319|mis:MICPUN_109115| cytochrome c peroxidase [EC:1.11.1.5]	GO:0055114//oxidation-reduction process;GO:0006979//response to oxidative stress	GO:0020037//heme binding;GO:0004130//cytochrome-c peroxidase activity	-
346	EJK54753.1	hypothetical protein THAOC_25591, partial [Thalassiosira oceanica]	80231.6	0.012	1	2	1.38	0.509	0.25	EJK54753.1	MTTAAPAPAGDDRGHRGEEATAKTRTDIILADRHSGNDRREKEKGAWTTAWTRGSLGARVARARTMAAAAMPVVANARSVASILTSTDGFHLSRAGMELHSPLNYKSLEHEFRRQRRLKVKDDTATSRNVQAMNDLHASQRRDEDAIFSEEEFCTPAGASSLESNLQNEVYADRDVDVMCGCLDGFAECSVTFNEEECEVLSCSDGRWNCLDPDASSVSVCTIERIITTWLLLDDIAPSLFLIQSTTEYTSGVANIHKTSALISVIEEEEPECLMFNVDRSQKKVTSKMLCAKEDGKDSCQGDSGGPLLIKGADSSQDLQIGVVSWGVGCGEDGAYPSVYARVSSAYDWIRAQVCKGSVDPPASFECDESAADDTVRSGHAKQERIVGGEDAKVGRFQY…	100	0	gi|397589675|gb|EJK54753.1|	hypothetical protein THAOC_25591, partial [Thalassiosira oceanica]	32.74	6e-16	sp|Q16651|PRSS8_HUMAN	Prostasin OS=Homo sapiens GN=PRSS8 PE=1 SV=1	89.4	6e-18	COG5640	Secreted trypsin-like serine protease	O	Posttranslational modification, protein turnover, chaperones	K01312|1|2e-13|73.2|mpp:MICPUCDRAFT_11334| trypsin [EC:3.4.21.4]		GO:0016787//hydrolase activity	-
							-
