# Supplementary material for: Quantitative Proteomic Analysis Reveals Novel Insights into Intracellular Silicate Stress-Responsive Mechanisms in the Diatom Skeletonema dohrnii
Source: Int J Mol Sci. 2019 May 23;20(10):2540. doi: 10.3390/ijms20102540 (PMC6566588; doi:10.3390/ijms20102540)
Supplement: Supplementary file 1 [file ijms-20-02540-s001.zip › IJMS-Table S3.xlsx]

## Sheet: Table S3
Title	Quantitative Proteomic Analysis Reveals Novel Insights into Intracellular Silicate Stress-Responsive Mechanisms in the Diatom Skeletonema dohrnii
Authors	Thangaraj Satheeswaran, Shang Xiaomei, Sun Jun*, Liu Haijiao
Table S1	Identified upregulation proteins subject to Si-limited-vs-Si-added condition
No	Protein_ID	Description	Mass	Protein_Coverage	Uniq_Pep_Num	Uniq_Spec_Num	Mean ratio	Std Dev	P-value	Protein_ID	Protein_Seqence	NCBInr Identity	NCBInr E-value	NCBInr Accession	NCBInr Description	Swissprot Identity	Swissprot E-value	Swissprot Accession	Swissprot Description	COG Score	COG E-value	COG ID	COG Function-Description	COG Code	COG Function-Categories	KEGG(ko_id|rank|evalue|score|identity|ko_definition)	GO Biological_Process	GO Molecular_Function	GO Cellular_Component
1	EED89001.1	predicted protein [Thalassiosira pseudonana CCMP1335]	24096.8	0.037	1	1	1.49	0.286	0.02901	EED89001.1	MKLAAFLLAVASSTSALELTPDNFAAETDGKTVFLKFFAPWCGHCKALKPDWDKLMEEFAGSSTQLIADIDCTAGGEPLCGEHGIQGFPTLKWGDPADLQDYEGGRSYDDLKAFADANLKPLCSVKNIDLCEPEKKTLIESYLKMDKDELQSLVEKEEEKIANAESNFESELEKLQAAYEKLSTEKDQTIADVKNAGLGMMKSVLKSKDASDGKDEL	100	6e-157	gi|224010068|ref|XP_002293992.1|	predicted protein [Thalassiosira pseudonana CCMP1335]	42.44	1e-50	sp|Q50KB1|SEP2_EMIHU	Protein disulfide-isomerase-like protein EhSep2 OS=Emiliania huxleyi GN=SEP2 PE=1 SV=2	58.2	2e-09	COG3118	Negative regulator of GroEL, contains thioredoxin-like and TPR-like domains	O	Posttranslational modification, protein turnover, chaperones	K09584|1|2e-50|166|mpp:MICPUCDRAFT_49655| protein disulfide-isomerase A6 [EC:5.3.4.1]!K13984|4|2e-21|89.4|cvr:CHLNCDRAFT_55742| thioredoxin domain-containing protein 5	GO:0045454//cell redox homeostasis;GO:0008152//metabolic process	GO:0016853//isomerase activity	GO:0005783//endoplasmic reticulum
2	XP_002291121.1	nucleoside diphosphate kinase [Thalassiosira pseudonana CCMP1335]	17377.6	0.25	3	9	1.32	0.164	0.02267	XP_002291121.1	MNASERTYIMIKPDGVQRGIVGNIISRFETKGYKLVALKTKQATKELLDTHYCDLVEKPFFPKLRDYMMSGPVVSMIWEGKEAVATGRKMLGATNPLASEPGTIRGDFCIEVGRNICHGSDSVENAEKEIALWFEESELLDWESHSKDWIYE	100	1e-111	gi|224002899|ref|XP_002291121.1|	nucleoside diphosphate kinase [Thalassiosira pseudonana CCMP1335]	70.95	3e-76	sp|P08879|NDKA_DROME	Nucleoside diphosphate kinase OS=Drosophila melanogaster GN=awd PE=1 SV=3	202	2e-66	COG0105	Nucleoside diphosphate kinase	F	Nucleotide transport and metabolism	K00940|1|7e-70|210|vcn:VOLCADRAFT_81768| nucleoside-diphosphate kinase [EC:2.7.4.6]	GO:0006165//nucleoside diphosphate phosphorylation;GO:0050896//response to stimulus;GO:0006228//UTP biosynthetic process;GO:0006183//GTP biosynthetic process;GO:0006241//CTP biosynthetic process	GO:0004550//nucleoside diphosphate kinase activity;GO:0005524//ATP binding	GO:0043231//intracellular membrane-bounded organelle;GO:0044444//cytoplasmic part
3	XP_002286746.1	hypothetical protein THAPSDRAFT_1326 [Thalassiosira pseudonana CCMP1335]	45770.7	0.181	7	29	1.36	0.223	0.03342	XP_002286746.1	MTRGLSTSRVVADSVFAPVGRVAGTQLEAAKQTPHGGTLVDLILKTDAEKEAAIAKCSKELQLTPRQLCDVELIMNGGFSPLTSFMDESTYKHVVDNVALPDGLIFGLPVVFDTDDEDLQPGDMVLLKDGDRAIATVEFTDKYMPNKAYECKQCYGTSEIEHPGSLMVATERGKYYMGGKITGLNLPIRDFPCKTPAEVRETLPDDVDVVAFQCRNPVHRAHYELFTRALDDPLVGEGGVVLVHPTCGPTQADDIPGVVRYKTYEVLKEETHNDRTRWEYLPYSMHMAGPREAIQHMMIRKNFGCTHFIIGRDMAGSKSSVTGEDYYGAYDAQDFAKEKGPELGVTPVPSLNLVYTEEEGYVTADEAKERGLNEKKLSGTKFRQMLRGGEDIPEWFAFK…	100	0	gi|223994125|ref|XP_002286746.1|	hypothetical protein THAPSDRAFT_1326 [Thalassiosira pseudonana CCMP1335]	39.47	2e-85	sp|P78937|MET3_SCHPO	Sulfate adenylyltransferase OS=Schizosaccharomyces pombe (strain 972 / ATCC 24843) GN=sua1 PE=1 SV=2	505	5e-178	COG2046	ATP sulfurylase (sulfate adenylyltransferase)	P	Inorganic ion transport and metabolism	K00958|1|0.0|538|csl:COCSUDRAFT_66886| sulfate adenylyltransferase [EC:2.7.7.4]	GO:0000103//sulfate assimilation	GO:0004781//sulfate adenylyltransferase (ATP) activity	-
4	XP_002288591.1	eucarytic translation initiation factor 5A [Thalassiosira pseudonana CCMP1335]	17205.4	0.075	1	3	1.49	0.257	0.02051	XP_002288591.1	MSDSEQYHIENADAGASATIPMEAGQIKKGGYIMIKGKPCKVLSISVSKTGKHGHAKCNFTAVDIFTGKKLEDMVPSSHGTTVPIVTRTEWEIIDIGEEGELTLMDEGGNQKTDVNLPGVPENMAQEIRDAWNDGENQVSVTVQAAVGQEQVVAYKKDS	100	6e-79	gi|223997836|ref|XP_002288591.1|	eucarytic translation initiation factor 5A [Thalassiosira pseudonana CCMP1335]	55.4	2e-36	sp|Q9AXQ5|IF5A2_SOLLC	Eukaryotic translation initiation factor 5A-2 OS=Solanum lycopersicum PE=2 SV=1	75.1	3e-16	COG0231	Translation elongation factor P (EF-P)/translation initiation factor 5A (eIF-5A)	J	Translation, ribosomal structure and biogenesis	K03263|1|2e-37|129|pop:POPTR_0010s17020g| translation initiation factor 5A	GO:0050896//response to stimulus;GO:0006414//translational elongation;GO:0045727//positive regulation of translation	GO:0008135//translation factor activity, nucleic acid binding	-
5	EJK52637.1	hypothetical protein THAOC_28062 [Thalassiosira oceanica]	66268.6	0.126	3	6	1.3	0.134	0.0156	EJK52637.1	MCGIFAIFSSSLPKGDLRKELIQCSSKLRHRGPDWSGYVVVEKDESKGISMNHGIAHERLAIMDPESGSQPLVSRGGNLIVAANGEVYNYKELYSALSTPYEPMTGSDCEVMIPLWDELGPSPELPNKLRGMYSVIMYDKASDTYFIFRDNVGKTPLYIGWGNDGSVYVASEMKSLVNECTRFQNFPPGHCYSNKGPNPGEFVRWYKPNWAPEMKPGLPPPKEKFQADVLRHAFEQSVIRRMMSDVPWGVLLSGGLDSSLVASICARNIARRSSSFPKLHSFTVGLEGSPDLIAAKRVADFLGTIHHAYTYTIEEGLDAIRDVIRSVETYDLTTIRASTPMYLMSRKIKAMGIKMVLSGEGADEVFGGYLYFHKAPNEQEFYDETVDKISRLHMYDCLR…	100	0	gi|397583422|gb|EJK52637.1|	hypothetical protein THAOC_28062 [Thalassiosira oceanica]	54.2	0	sp|P31752|ASNS_ASPOF	Asparagine synthetase [glutamine-hydrolyzing] OS=Asparagus officinalis PE=2 SV=2	634	0	COG0367	Asparagine synthetase B (glutamine-hydrolyzing)	E	Amino acid transport and metabolism	K01953|1|0.0|626|ppp:PHYPADRAFT_226188| asparagine synthase (glutamine-hydrolysing) [EC:6.3.5.4]	GO:0006529//asparagine biosynthetic process;GO:0009743//response to carbohydrate	GO:0004066//asparagine synthase (glutamine-hydrolyzing) activity;GO:0005524//ATP binding	-
6	EED90024.1	phenylalanine-trna synthetase-like protein [Thalassiosira pseudonana CCMP1335]	48679.9	0.121	3	5	1.3	0.18	0.03456	EED90024.1	MKISTTAALAIATISTCQAWSTTSPSRVNAFTSSRTTSTSLFSTKEAVNYATPERYLSEHPNNNVPPHIASLVGKGLHTRSNHPIGIIRSKIQEYFASLPHEYTIYDAEDPIVTTKQCFDDLRIPPEHPGRSPSDTYYIDDTTLLRTHTSAHQSEHLRSGADCFLCAGDVYRRDEIDSSHYPAFHQLEGVRLFPKEEMVGADGLTGDEWVNSPECQKIGEDLKVTLEGLMDHLFGETEKKWSEDYFPFTTPSYELEIKYEGEWLEVLGCGVVHEEVLQMADRADRRGWAFGLGLERLAMILFEIPDIRLFWSEDERFHSQFKEGQITKFQPYSKFPPVYKDIAFWIPEGFVENDFFEMARGIAGDIVERMELIDEFTNPKKGKTSKCYRITYRSMDRSL…	100	0	gi|224007737|ref|XP_002292828.1|	phenylalanine-trna synthetase-like protein [Thalassiosira pseudonana CCMP1335]	54.35	5e-140	sp|Q94K73|SYFM_ARATH	Phenylalanine--tRNA ligase, chloroplastic/mitochondrial OS=Arabidopsis thaliana GN=At3g58140 PE=1 SV=1	149	8e-40	COG0016	Phenylalanyl-tRNA synthetase alpha subunit	J	Translation, ribosomal structure and biogenesis	K01889|1|3e-145|424|ppp:PHYPADRAFT_140667| phenylalanyl-tRNA synthetase alpha chain [EC:6.1.1.20]	GO:0006432//phenylalanyl-tRNA aminoacylation;GO:0008033//tRNA processing	GO:0005524//ATP binding;GO:0004826//phenylalanine-tRNA ligase activity;GO:0000287//magnesium ion binding;GO:0000049//tRNA binding	GO:0005737//cytoplasm
7	XP_002292723.1	hypothetical protein THAPSDRAFT_29506 [Thalassiosira pseudonana CCMP1335]	11334.1	0.086	1	1	1.42	0.279	0.04188	XP_002292723.1	MFARATRPLYRSLAPLGDRILIRRAEKEVKTASGILLPTDKGKDPNEGVVVAVGPGLRDVSGVLHAPTVKAGDTVLLPKYGGTEIEIGDEKMSLFREEDILGKFE	100	2e-69	gi|224007527|ref|XP_002292723.1|	hypothetical protein THAPSDRAFT_29506 [Thalassiosira pseudonana CCMP1335]	49.48	1e-24	sp|P34893|CH10_ARATH	10 kDa chaperonin, mitochondrial OS=Arabidopsis thaliana GN=CPN10 PE=1 SV=1	90.9	1e-23	COG0234	Co-chaperonin GroES (HSP10)	O	Posttranslational modification, protein turnover, chaperones	K04078|1|6e-26|95.9|pxb:103961033| chaperonin GroES	GO:0006457//protein folding	GO:0005524//ATP binding	GO:0005737//cytoplasm
8	XP_002293272.1	predicted protein [Thalassiosira pseudonana CCMP1335]	41719.8	0.051	2	3	1.43	0.079	0.0009906	XP_002293272.1	MHSPPLLDTPQSNNAASNYFNPKITSKIPSQPPQKKKPPLPNMNTTKPEYTSDYSDVDDDIDDDITDGLLDLYQDYDDIGGFDLSPFEQHAREVFMTYAQQVQSNVDLESDNLTAVEGEDTKIANSGILQQQLFSMLQTLDIDATKDESDTLFKYLDEDGSGLVTLDEFLPWYAEAVDAAQQTAVGFQNLVKSRRTVNKFDATEVDDGVLRRALECAIAAPNRRGTEPWRFIKLGKKTVGKIVKLREKISGSGGEGSFVSWTKVPHWIVVTYKRAKPDSGPDGKMQQREDFKSTCCAIQNFLLSMWSEGIGTKWTDGPLQRTEEFAEICGIDLKEEKLAGVIWYGFAKGGLNRVDAKWRRKGVDEVLDILP	100	0	gi|224008626|ref|XP_002293272.1|	predicted protein [Thalassiosira pseudonana CCMP1335]	27.81	6e-15	sp|O31571|YFHC_BACSU	Putative NAD(P)H nitroreductase YfhC OS=Bacillus subtilis (strain 168) GN=yfhC PE=3 SV=1	87	2e-18	COG0778	Nitroreductase	C	Energy production and conversion	-	GO:0055114//oxidation-reduction process	GO:0016491//oxidoreductase activity;GO:0005509//calcium ion binding	-
9	EED92818.1	phosphoribulokinase [Thalassiosira pseudonana CCMP1335]	42515.5	0.072	2	6	1.65	0.244	0.006218	EED92818.1	MKFLVASLIASASAFSTINTPTLRGNSALAALKDGEVPIVIGLAADSGCGKSTFMRRVTSTFGGETCGPLGGGFGNGGWETNTLVSDMATVICLDDYHLNDREGRKVSGLTALNTAEQKFDLMFEHVKALKEGKTIMKPIYNHVNGTLDTPEEIEPTPVIIIEGLHPFVDERVRELIDFSLYLDISPDVKLNWKIQRDMEERGHSLESIMASIEARKPDFDAFIEPQKKFADYVIEVLPTDLDKEDKKTLKVRAIQKKGVADFTPTYLFDEGSEIEWAPSADKLSSPAPGIKLSYKQEQYFGADVAVVEMDGTFDNIQELVYVESNLGNTNSKFYGEVTQAMLSLADSPGSNNGTGLMQTLAAFAIRELYNKKSAAAKLAATKETAASA	100	0	gi|223999217|ref|XP_002289281.1|	phosphoribulokinase [Thalassiosira pseudonana CCMP1335]	63.2	2e-139	sp|P26302|KPPR_WHEAT	Phosphoribulokinase, chloroplastic OS=Triticum aestivum PE=2 SV=1	404	5e-139	COG0572	Uridine kinase	F	Nucleotide transport and metabolism	K00855|1|6e-143|414|bpg:Bathy06g04980| phosphoribulokinase [EC:2.7.1.19]	GO:0005975//carbohydrate metabolic process;GO:0016310//phosphorylation	GO:0008974//phosphoribulokinase activity;GO:0005524//ATP binding	-
10	EJK69871.1	hypothetical protein THAOC_08831 [Thalassiosira oceanica]	20838.3	0.267	3	13	2.05	0.458	0.008542	EJK69871.1	MEERGHSLESIMASIEARKPDFDAYIEPQKAFADYVIEVLPTDLDKEDKKTLKVRAIQKKGVADFNPTYLFDEGSEVSWTPSADKLSSPAPGMKLSYTQEEYFGNDVSVLEMDGSFDNIQELVYVESNLGNANSKFYGEITQAMLSLADSPGSNNGTGLMQTLAAFAIRELYNKKAASAKLAASKEAVATA	100	7e-115	gi|397630689|gb|EJK69871.1|	hypothetical protein THAOC_08831 [Thalassiosira oceanica]	61.49	1e-68	sp|P26302|KPPR_WHEAT	Phosphoribulokinase, chloroplastic OS=Triticum aestivum PE=2 SV=1	221	1e-70	COG0572	Uridine kinase	F	Nucleotide transport and metabolism	K00855|1|2e-71|224|sot:102591470| phosphoribulokinase [EC:2.7.1.19]	GO:0005975//carbohydrate metabolic process;GO:0016310//phosphorylation;GO:0006950//response to stress	GO:0005524//ATP binding;GO:0008974//phosphoribulokinase activity	GO:0009526//plastid envelope;GO:0009579//thylakoid;GO:0016020//membrane;GO:0044434//chloroplast part
11	ACI64795.1	predicted protein [Thalassiosira pseudonana CCMP1335]	24196.6	0.042	1	1	1.37	0.088	0.00223	ACI64795.1	MTGLLSITTLILASAASQTNAFAGNGLLPHETTWRLRLLLNDVTTSQGKKLDGQLFVLEGHFIEEEGYEPPQGLFRPFAKERVEGGTGKDNAMVLEVIRSRWTLSEDPNDKKDGLWIWGLFKEPLYPFMLLQIETKELELPSGTQQAQDGREDIKSDTIPPLKLYAQVTHIRNEEVGVELKTANLNVRVLEKIQLPGASVDLYEEERVGQVSFQPL	100	6e-157	gi|224004854|ref|XP_002296078.1|	predicted protein [Thalassiosira pseudonana CCMP1335]	-	-	-	-	-	-	-	-	-	-	-	-	-	-
12	EJK70508.1	hypothetical protein THAOC_08124, partial [Thalassiosira oceanica]	7770.95	0.162	1	1	1.71	0.283	0.008033	EJK70508.1	MYSVEAPKNYGRSTLPIRFDFPTDWLAIDKLGGGIQYVDQRNGNKLYVLRASLPEGSNLKNCQQELVF	100	3e-45	gi|397632337|gb|EJK70508.1|	hypothetical protein THAOC_08124, partial [Thalassiosira oceanica]	-	-	-	-	-	-	-	-	-	-	-	-	-	-
13	ACI64945.1	predicted protein [Thalassiosira pseudonana CCMP1335]	46682.2	0.15	5	21	1.69	0.161	0.001598	ACI64945.1	MKLFNAALILAVIGNASAFAPAAPSLGLRTVGPSTFDFALDAKKSIEDLSEADLKGKKVLVRCDVNVPLDGKKITDDTRIRSSIPTIEYLKGKGAIVTVCSHLGRPKDGPEDKFSLGPCAERMGELLGQEVKLAPDCIGEEVSTLVNAAKEGDVIMLENTRFYKEEEKNEAGFVEKLAAPFDLFVNDAFGTAHRAHASTEGVTKFLQPSVSGFLLAKELEYLDGAIENGKKPMAAIVGGSKVSSKITVLNALLDKCDKIIIGGGMVFTFLKAKGLNVGTSLVEDDYVETAKEVLAKAEKLGKEILLPSDIVIADKFAADAETKVVSSDAIPDGWMGLDNGPASTAEQKEFLSDCQTVIMNGPMGVFEMKAFEKGTFGLVDILADLSKEKGAITIIGGGD…	100	0	gi|224005154|ref|XP_002296228.1|	predicted protein [Thalassiosira pseudonana CCMP1335]	62.3	3e-180	sp|Q9SBN4|PGKH_VOLCA	Phosphoglycerate kinase, chloroplastic OS=Volvox carteri GN=PGK PE=2 SV=1	499	4e-175	COG0126	3-phosphoglycerate kinase	G	Carbohydrate transport and metabolism	K00927|1|0.0|538|ccp:CHC_T00004105001| phosphoglycerate kinase [EC:2.7.2.3]	GO:0050896//response to stimulus;GO:0006096//glycolytic process;GO:0016310//phosphorylation	GO:0004618//phosphoglycerate kinase activity;GO:0000166//nucleotide binding	GO:0009526//plastid envelope;GO:0071944//cell periphery;GO:0016020//membrane;GO:0044434//chloroplast part
14	EJK46725.1	hypothetical protein THAOC_34595 [Thalassiosira oceanica]	59914.8	0.052	8	19	1.01	0.099	0.1626	EJK46725.1	MSVKDLTDFYEAEITDAKENDIMLSLHLKATMMKVSDPILFGHCSHALSSVKVFFKDVFDKHGEVLDEIGANPNLGLGAIYESIDSKLPADKAQEIRDDIDACYEERPWLAMVNSDKGITNLHVPSDVIIDASMPVVIRDSGQMWNKDGELEDTKCLIPDRSYATMYQEVISYCKTKGQFDVATMGNVANVGLMAQKAEEYGSHDKTFEIESQGVVMVRDKNSGEVYFEHSVNEGDLWRMAQTKDAPIKDWVRLAVERSKATGVRAIFWLDKRRAHDASLIDKVNTYLNEHDLSGTDISIMKPVDAVRATMERCTDGKDTISVTGNVLRDYLTDLFPILELGTSAKMLSIVPLLSGGGLYETGAGGSAPKHVQQFVKEGHLRWDSLGEYLATAVALEHM…	100	0	gi|397569403|gb|EJK46725.1|	hypothetical protein THAOC_34595 [Thalassiosira oceanica]	57.78	0	sp|P16100|IDH_AZOVI	Isocitrate dehydrogenase [NADP] OS=Azotobacter vinelandii GN=icd PE=1 SV=5	654	0	COG2838	Monomeric isocitrate dehydrogenase	C	Energy production and conversion	K01681|1|0.0|603|mpp:MICPUCDRAFT_70903| aconitate hydratase [EC:4.2.1.3]	GO:0006099//tricarboxylic acid cycle	GO:0004450//isocitrate dehydrogenase (NADP+) activity	-
15	EJK51401.1	hypothetical protein THAOC_29427 [Thalassiosira oceanica]	38353.5	0.076	1	1	1.23	0.11	0.01871	EJK51401.1	MSLKPYIETLIDGSRRLTSDETYSAFSAILTENPPQCQVASLLTLLRARRENPQEIAGMVRAMNSACKAVNFNEEKKLLDIVGTGGDGADTINISTASVVLAAACGATVAKAGNRSVSSCCGSADVLEALGVQVDLSPTQVVECVEKCGIAFLFAPINHPAMKAVAPVRKQLGVRTCFNILGPMTNAASAQRAVIGVFHEELLELMAETLKEVGRVDHAVVIHGVGLDEISPLGPATIVEIKNTAPPGEPRVYTTTKYEFDPMSVNIPRCKVEDLKGGDPAQNAKEFELVLTGGEYETNAKKDSIVLNAGVGCYVYGLSDSIEEGCALAKKTLVSGKATEVLNEWRQVSKEIAGRG	100	0	gi|397579956|gb|EJK51401.1|	hypothetical protein THAOC_29427 [Thalassiosira oceanica]	44.07	2e-84	sp|Q8TLP5|TRPD_METAC	Anthranilate phosphoribosyltransferase OS=Methanosarcina acetivorans (strain ATCC 35395 / DSM 2834 / JCM 12185 / C2A) GN=trpD PE=3 SV=1	273	4e-88	COG0547	Anthranilate phosphoribosyltransferase	E	Amino acid transport and metabolism	K00766|1|3e-87|270|olu:OSTLU_32105| anthranilate phosphoribosyltransferase [EC:2.4.2.18]	GO:0000162//tryptophan biosynthetic process	GO:0004048//anthranilate phosphoribosyltransferase activity	-
16	XP_002288364.1	DNA topoisomerase [Thalassiosira pseudonana CCMP1335]	73794.9	0.022	1	1	1.39	0.247	0.03935	XP_002288364.1	MESTEAINGAYSANQITVLSGLEPVRKRPGMYIGSTGPDGLHHLVYEVLDNSVDEALAGHASMISMVLHDAPGVDDSGENEKVGNCCTITDDGRGIPTDLHPTTKISALETVLTVLHAGGKFDNSQQGSGYKVSGGLHGVGISVVNALSEFVEVRVDRGSKSAENDIENTSSVAYKTSLVQKLYSQRKAGTTVTFLPDITVFKGVNGKPDITFDASRLASRMDEIAYLNAGLVLTLQDKRILSGRSKVDKSNIVTVFHHADDGATLLFHGTITPSSSSPGIQQLPITIDAALRYSANTYSENILSFVNNIRTKDGGSHVEGLKSCLTRTLNQSARRLGKLKDGDSNLSGDFVREGLTAIISVSVSEPEFEGQTKGRLGNPEVRPAVETALGAELTKFFD…	100	0	gi|223997382|ref|XP_002288364.1|	DNA topoisomerase [Thalassiosira pseudonana CCMP1335]	49.18	0	sp|P77993|GYRB_THEMA	DNA gyrase subunit B OS=Thermotoga maritima (strain ATCC 43589 / MSB8 / DSM 3109 / JCM 10099) GN=gyrB PE=3 SV=2	686	0	COG0187	DNA gyrase/topoisomerase IV, subunit B	L	Replication, recombination and repair	K02470|1|0.0|613|jcu:105642353| DNA gyrase subunit B [EC:5.99.1.3]	GO:0006265//DNA topological change	GO:0003918//DNA topoisomerase type II (ATP-hydrolyzing) activity;GO:0005524//ATP binding	GO:0005694//chromosome
17	AIR75900.1	heat shock protein 70 (chloroplast) [Roundia cardiophora]	65884.2	0.119	2	5	1.37	0.187	0.02013	AIR75900.1	MNKVVGIDLGTTNSVVAAIEGGQPVVITNAEGFRTTPSIVAYTKKEELLVGQIAKRQAVINPENTFFSVKRFIGCKENEVSEESKELPYKVIQDANGNIKIKCSSLNKDFSPEEISAQVLRKLVTDAKEYLGQDVTKAVITVPAYFNDSQRQATMDAGKIAGIEVLRIINEPTAASLAYGLDKKQNETILVFDLGGGTFDVSILEVGDGIFEVLSTAGDTNLGGDDFDKAIVRWLIEDFESKEGINLTKDVQALQRLTEAAERAKMELSTVSKTTINLPFITADKSGPKHIQQDLTREKFENLCRELINRCKIPVEKALKDAKLEQSEINEVVLIGGSTRIPAIQELVQSLTGKKPNKSVNPDEVVAIGAAIQAGILAGEITDILLLDVTPLSLGVETF…	100	0	gi|700658222|ref|YP_009093227.1|	heat shock protein 70 (chloroplast) [Roundia cardiophora]	84.64	0	sp|A0T0X1|DNAK_THAPS	Chaperone protein dnaK OS=Thalassiosira pseudonana GN=dnaK PE=3 SV=1	836	0	COG0443	Molecular chaperone DnaK (HSP70)	O	Posttranslational modification, protein turnover, chaperones	K03283|1|0.0|757|olu:OSTLU_48839| heat shock 70kDa protein 1/8	GO:0006457//protein folding;GO:0006950//response to stress	GO:0005524//ATP binding;GO:0051082//unfolded protein binding	GO:0009507//chloroplast
18	EJK74797.1	hypothetical protein THAOC_03499 [Thalassiosira oceanica]	48911.2	0.101	5	40	1.3	0.02	0.3055	EJK74797.1	MPALSSTMKEGKVVSWLKGEGDSVEAGEAIMVVESDKADMDVEAFEDGFIAAIITEEGEAANVGSPVALIAANEADIPALKSYAATLGGAAPVAAAPTPAPAAAAAPKASPKAAANPAASAGGRVVASPLAKKMAEEMGVDLSTVSGTGPNGRITAADVTNAASGAAPAKKAAAPVKPRLCSSTLSWTPAPGVIAATPTARALAKKAKLDLASIPGTGEFGRVTADDVKIATGQMKPKRAKAAPGAPAPVEMPEGLVPFTGMQRAVSNNMVATLDCPVFRASREIEMDAFNALYQSVKPKGVTVSALLAKAVAKAIEKHPIVNSSFREEGTFFNKDINIAMAVAIDGGLITPVLKYANERDVLDIGENWKELVGKAKSGTLSPDEYNSGTFTISNMGMF…	100	0	gi|397641689|gb|EJK74797.1|	hypothetical protein THAOC_03499 [Thalassiosira oceanica]	47.83	3e-73	sp|Q9SQI8|ODP24_ARATH	Dihydrolipoyllysine-residue acetyltransferase component 4 of pyruvate dehydrogenase complex, chloroplastic OS=Arabidopsis thaliana GN=LTA2 PE=2 SV=1	359	9e-119	COG0508	Pyruvate/2-oxoglutarate dehydrogenase complex, dihydrolipoamide acyltransferase (E2) component	C	Energy production and conversion	K00627|1|8e-93|296|ccp:CHC_T00007488001| pyruvate dehydrogenase E2 component (dihydrolipoamide acetyltransferase) [EC:2.3.1.12]	GO:0006090//pyruvate metabolic process;GO:0006694//steroid biosynthetic process;GO:0009108//coenzyme biosynthetic process;GO:0006633//fatty acid biosynthetic process;GO:0006084//acetyl-CoA metabolic process;GO:0006790//sulfur compound metabolic process;GO:0006520//cellular amino acid metabolic process;GO:0006725//cellular aromatic compound metabolic process;GO:0046483//heterocycle metabolic proce…	GO:0004742//dihydrolipoyllysine-residue acetyltransferase activity	GO:0009941//chloroplast envelope;GO:0016020//membrane;GO:0022626//cytosolic ribosome;GO:0009570//chloroplast stroma;GO:0009534//chloroplast thylakoid
19	EJK49021.1	hypothetical protein THAOC_32138 [Thalassiosira oceanica]	24312.5	0.213	1	1	1.37	0.063	0.0008032	EJK49021.1	MALLPKKEKAGKEKRRGGRRPETTVAVRSAGAASSKLSLGLLSATGAAVTAYQFRQPPASCDKLPVHGIAGTNQERTFLAVKPDGVQRGLVGDIIARFEKRGYKLVGLKLVWPTLEMAQNHYADLSKKPFYPGLCKFFSSGPIVCMCWEGKDIINQGRQMLGETQPLASKPGSIRGDFSIDLGRNICHGSDSPEAAAHELAMWFPEGVNDWAKTVDAWVYE	100	4e-131	gi|397574083|gb|EJK49021.1|	hypothetical protein THAOC_32138 [Thalassiosira oceanica]	59.6	5e-65	sp|Q9UUY8|NDK_NEUCR	Nucleoside diphosphate kinase OS=Neurospora crassa (strain ATCC 24698 / 74-OR23-1A / CBS 708.71 / DSM 1257 / FGSC 987) GN=ndk-1 PE=2 SV=2	197	5e-63	COG0105	Nucleoside diphosphate kinase	F	Nucleotide transport and metabolism	K00940|1|3e-64|199|atr:18429227| nucleoside-diphosphate kinase [EC:2.7.4.6]	GO:0006165//nucleoside diphosphate phosphorylation;GO:0006228//UTP biosynthetic process;GO:0006183//GTP biosynthetic process;GO:0006241//CTP biosynthetic process	GO:0004550//nucleoside diphosphate kinase activity;GO:0005524//ATP binding	GO:0005737//cytoplasm
20	EED89252.1	predicted protein [Thalassiosira pseudonana CCMP1335]	128544	0.016	1	1	3.75	0.9	0.001478	EED89252.1	MGAKAARLMGTGKSIDARRASINIRAGDNPNESSPPRVETLRKWKSNPYNELPLTFPSMEPRHSNGREGQIKDLSESLTRNLSASTSDVWDLLGEMRSNPDDVTILTRKCHELRSVGTNQAGSLYEIIDVMIRYPREGQLQFAAIGALWSLIADGEDDRIVEALDAGAAKTIMNAMRNIPGDPDLIAWGMGALCSIAEGVGGRTELQNQRILEEIETVLSNYHTFNSGNVIYWTLRCLETLVAFKQTTEDDADDGDNDDSSDAIQDLDAARRYRETITNYGILHYVISAMSNHSTDAVTLEVGFKFLEHLPSESLTDENQKLLLDICGEASKASPSASFQTLHIRSCAFLSTILNNNPTMRSHVLNKPSEWLWSFIGIALGTLASYNDDDVVVRDIMTF…	100	0	gi|224009115|ref|XP_002293516.1|	predicted protein [Thalassiosira pseudonana CCMP1335]	-	-	-	-	-	-	-	-	-	-	-	-	-	-
21	XP_002295282.1	predicted protein [Thalassiosira pseudonana CCMP1335]	45405.9	0.217	4	14	1.29	0.139	0.01837	XP_002295282.1	MADRRVVVTGMGITSCLGNTLEDVKASLHDAKSGIKFDQEWADLGIKSNVRGRPDLTDEDFKELIPKANLRFMGTNAKYAYIAMERAIEDSGMKPEEYQENPRVCAILGQGGTSIPDIVETVEAVKGGGRWKNKVGPFRVTRSMGSTVSAVLATAFKVQGMSFSISSACSTGAHCIGTGYEQILLNKADVAFCGAGENVDWDFTSMFDCMGALSTSYNDTPEKASRAFDKNRDGFCIAGGGGVVILEELEHAKARGAKIYAELVGYGANSDGYDMVAPSGVGGERCMELAMEDAKNHNGDKPVEYINTHGTSTPVGDLAELGAIKRLFDRKGYQPNVGSTKSLSGHALGAAGVHETIYTILMMNNDFMAESANIEELVDEAEGMNILTSRKDGPFTRAM…	100	0	gi|224013261|ref|XP_002295282.1|	predicted protein [Thalassiosira pseudonana CCMP1335]	55.05	6e-153	sp|Q02K94|FABB_PSEAB	3-oxoacyl-[acyl-carrier-protein] synthase 1 OS=Pseudomonas aeruginosa (strain UCBPP-PA14) GN=fabB PE=1 SV=1	486	5e-170	COG0304	3-oxoacyl-(acyl-carrier-protein) synthase	IQ	Lipid transport and metabolism;Secondary metabolites biosynthesis, transport and catabolism	K09458|1|9e-64|215|thj:104808867| 3-oxoacyl-[acyl-carrier-protein] synthase II [EC:2.3.1.179]	GO:0044238//primary metabolic process	GO:0016740//transferase activity	-
22	EED88332.1	phosphoribosylformylglycinamidine synthase [Thalassiosira pseudonana CCMP1335]	145289	0.042	2	5	1.23	0.16	0.04839	EED88332.1	MSSIIHYYRKTETPHSLLPSLKEQLSTSSSSSTVDITSIETESCFNVQIEGALNEEDKNRLEWLLRETFCKDGLRLETSAFANVVNDDNTNNKVVLEFGPRMTFTSAFSSNATSITSACGLSKISRLERSKRYCITFSSPPTSTLIATLESLLHDRMTEQRYEVPITSFESGAKVEPVVWVKIMEEGREALERINAERGLGFDDFDLDFYTELFKEKLGRNPTDVECFDMGQSNSEHSRHWYFSGKMIIDGVEKPHTLFQMVKATLPKGIPNNSIIAFHDNSSSIRGYECQVLVPSSVSTAGKMEVVRKTMHPILTAETHNFPSAVAPFPGAETGTGGRLRDVMATGRGAYAVAGVCAYCVGNLNVPGYELPWEDKSFVYPSNLASPLEIEIEASNGAS…	100	0	gi|224011082|ref|XP_002294498.1|	phosphoribosylformylglycinamidine synthase [Thalassiosira pseudonana CCMP1335]	54.68	0	sp|Q9M8D3|PUR4_ARATH	Probable phosphoribosylformylglycinamidine synthase, chloroplastic/mitochondrial OS=Arabidopsis thaliana GN=At1g74260 PE=2 SV=3	1453	0	COG0047	Phosphoribosylformylglycinamidine (FGAM) synthase, glutamine amidotransferase domain	F	Nucleotide transport and metabolism	K01952|1|0.0|1346|osa:4324899| phosphoribosylformylglycinamidine synthase [EC:6.3.5.3]	GO:0006189//'de novo' IMP biosynthetic process	GO:0004642//phosphoribosylformylglycinamidine synthase activity	GO:0009536//plastid
23	EED95307.1	predicted protein [Thalassiosira pseudonana CCMP1335]	38075.7	0.145	2	2	1.46	0.245	0.02115	EED95307.1	MKMLLASMALLGAASAFVPSHVSPSSITSTIGSGANTQLFTEPRPKIAENVLELIGHTPLVKITKVTGPSCVAEVVAKLESSNPANSVKDRIALSMIQEAEARGDISPGKSTLVEPTSGNTGIGLAMVAASKGYKLILTMPESMSMERRVLLKAFGADVKLTPAAKGMGGAIAKAEEIVDSLGPDGYLLQQFNNPDNPKVHRETTGPEIWEDTDGKIDILLGGVGTGGTLTGCGQYLKPRNPDMKIVAVEPAESAVLSGGKPGPHKIQGIGAGFIPGNADTSLIDEVVQISGEDAMAMARKLATDEGIFCGISSGAAILAAKEVGSRPENADKRIVVILPSFGERYLSTALFQNLWDEASALKAE	100	0	gi|223996381|ref|XP_002287864.1|	predicted protein [Thalassiosira pseudonana CCMP1335]	64.89	7e-126	sp|O81155|CYSKP_SOLTU	Cysteine synthase, chloroplastic/chromoplastic OS=Solanum tuberosum PE=2 SV=1	389	4e-134	COG0031	Cysteine synthase	E	Amino acid transport and metabolism	K01738|1|6e-128|373|apro:F751_4408| cysteine synthase A [EC:2.5.1.47]	GO:0006535//cysteine biosynthetic process from serine	GO:0016740//transferase activity;GO:0030170//pyridoxal phosphate binding;GO:0004124//cysteine synthase activity	GO:0044434//chloroplast part
24	EJK67142.1	hypothetical protein THAOC_11863 [Thalassiosira oceanica]	48620.1	0.054	2	4	1.45	0.112	0.002471	EJK67142.1	MKARRRATALMASAVVLSRTLPSAAFQSCAERSRDTRRSTPSSSLQSSLDPQIDPLSPTSSPGPAGMKKKDLRTFQRFLEVECWKSPSIRGLDRTLLSVADACKQINRIVQRAQTDDLYGAAVDPLTGELAEVNVQGEVQQQLDVLCNTLMLRAFCGSGGVCAVASEEEPIPRSCGDVMGYENENVISDGEYVAVFDPIDGSKNIDSSLPVGTVFGIYRSPAKSGSSKLHIESFLQRGTNLVASGYCLYSATTVLVLTLGSGVHGFTLDPDKQTFLQTHPNMRIPDVGNLYSFNEAYYRDYGEPVQRFLSNMKESGTMGGKKVSARYVGALVADVHNVLINGGIYGYPATRDDPNGKLRLLYESAPMAMVMEQAGGAGSTGRGRILDVLPPQPSQDGVT…	100	0	gi|397623781|gb|EJK67142.1|	hypothetical protein THAOC_11863 [Thalassiosira oceanica]	39.49	1e-81	sp|Q07204|F16P1_BRANA	Fructose-1,6-bisphosphatase, chloroplastic OS=Brassica napus GN=FBP PE=2 SV=1	257	8e-81	COG0158	Fructose-1,6-bisphosphatase	G	Carbohydrate transport and metabolism	K03841|1|1e-86|273|ota:Ot03g00330| fructose-1,6-bisphosphatase I [EC:3.1.3.11]	GO:0019253//reductive pentose-phosphate cycle	GO:0042132//fructose 1,6-bisphosphate 1-phosphatase activity;GO:0000287//magnesium ion binding	GO:0005737//cytoplasm
25	EJK61816.1	hypothetical protein THAOC_17627 [Thalassiosira oceanica]	47630.7	0.168	1	2	1.26	0.016	4.486e-05	EJK61816.1	MTSVQQQQNGDKVSGTGTYKDGLVAPKKDTRYKTEDVTQTKGRDFEDFFLKRELLMGIFEKGFEKPSPIQEEAIPIMLQNRNVLARAKNGTGKTAAYIIPCLEKTDTTQKHVQVLVLIPTRELALQTSAIVKEIGKHMGIQCMVTTGGTSLKDDIMRMYNTVHMIVATPGRILDLASRKVADLSKCRTIIMDEADKLLSPEFQPVLEKIIGLCDSSHQICLFSATFPVTVKDFCQKHVPKPYSINLMEELTLRGITQFYAYVEERQKVHCLNTLFSKLEINQSIIFCNSVNRVELLAKKVTELGYSCFYIHAKMQQANRNRVFHEFRNGGTRHLVTSDLFTRGIDIQSVNVVINFDFPKNAETYLHRIGRSGRFGHLGLAVNLITYDDRHALRTVESDL…	100	0	gi|397612614|gb|EJK61816.1|	hypothetical protein THAOC_17627 [Thalassiosira oceanica]	72.14	0	sp|Q7XMK8|RH6_ORYSJ	DEAD-box ATP-dependent RNA helicase 6 OS=Oryza sativa subsp. japonica GN=Os04g0533000 PE=2 SV=1	270	2e-83	COG0513	Superfamily II DNA and RNA helicase	L	Replication, recombination and repair	K12614|1|0.0|630|csl:COCSUDRAFT_24291| ATP-dependent RNA helicase DDX6/DHH1 [EC:3.6.4.13]	GO:0019048//modulation by virus of host morphology or physiology	GO:0008026//ATP-dependent helicase activity;GO:0003676//nucleic acid binding;GO:0005524//ATP binding	-
26	YP_004072542.1	ATP synthase CF1 subunit beta (chloroplast) [Thalassiosira oceanica CCMP1005]	51155.4	0.319	1	1	7.13	3.093	0.004259	YP_004072542.1	MVETTNKGYVSQIIGPVLDIEFPSGNLPPIYSAIKVETADGLGNIVEVQQLLGDNKVRAVSMRSTDGLKRGVEAVDLGTPISVPVGTPTLGRIFNVIGEPVDEQGDVSLDETLPIHREAPAFTELETKPSIFETGIKVVDLLAPYRRGGKIGLFGGAGVGKTVLIMELINNIAKAHGGVSVFGGVGERTREGNDLYEEMKESGVINSNNFAESKVALVYGQMNEPPGARMRVGLTALTMAEYFRDVNKQDVLLFIDNIFRFTQAGSEVSALLGRMPSAVGYQPTLATEMGALQERITSTTQGSITSIQAVYVPADDLTDPAPATTFAHLDATTVLSRNLAAKGIYPAVDPLDSTSTMLQPGIVTEEHYAIAENVKETLQRYKELQDIIAILGIDELSEE…	100	0	gi|315320486|ref|YP_004072542.1|	ATP synthase CF1 subunit beta [Thalassiosira oceanica CCMP1005]	95.15	0	sp|A0T0R6|ATPB_THAPS	ATP synthase subunit beta, chloroplastic OS=Thalassiosira pseudonana GN=atpB PE=3 SV=1	774	0	COG0055	FoF1-type ATP synthase, beta subunit	C	Energy production and conversion	K02112|1|0.0|769|ccp:CHC_765| F-type H+-transporting ATPase subunit beta [EC:3.6.3.14]	GO:0042777//plasma membrane ATP synthesis coupled proton transport;GO:0015991//ATP hydrolysis coupled proton transport	GO:0008553//hydrogen-exporting ATPase activity, phosphorylative mechanism;GO:0046933//proton-transporting ATP synthase activity, rotational mechanism;GO:0005524//ATP binding;GO:0046961//proton-transporting ATPase activity, rotational mechanism	GO:0045261//proton-transporting ATP synthase complex, catalytic core F(1);GO:0009535//chloroplast thylakoid membrane;GO:0005886//plasma membrane
27	XP_002294929.1	predicted protein, partial [Thalassiosira pseudonana CCMP1335]	19367.7	0.174	3	6	1.74	0.169	0.001454	XP_002294929.1	MGAKGAYIVRLLMVGDSSCGKTSLVLRFDQNVFSTKFVTTIGVDYRDKMVKIEGAPMRLQLWDTAGQERFRSLTSNFFGRADGFVLCYDISNRPSFDHVIGWMRDIKTRAPPDCDIVLCGNKSDLEADRVVQVDEGKSLAEEYGVQFFETSALTGANVEGMFTALATTIKRR	100	4e-126	gi|224012553|ref|XP_002294929.1|	predicted protein [Thalassiosira pseudonana CCMP1335]	44.31	6e-53	sp|Q39433|RB1BV_BETVU	Ras-related protein RAB1BV OS=Beta vulgaris GN=RAB1BV PE=2 SV=1	87	3e-20	COG1100	GTPase SAR1 family domain	R	General function prediction only	K07901|1|2e-54|174|spen:107021094| Ras-related protein Rab-8A	GO:0007264//small GTPase mediated signal transduction;GO:0015031//protein transport	GO:0005525//GTP binding	GO:0044464//cell part
28	EJK51397.1	hypothetical protein THAOC_29434 [Thalassiosira oceanica]	18879.5	0.127	1	1	1.89	0.363	0.007884	EJK51397.1	MPEGITEDEVRGLFSLWNNALATLDPKKVADRYSKTGVLLPTVSDTPRTDYASIEDYFTNFLKLKPQGEILESHVTIGKNWCEDVGIYEFSMGATGKKVKGRYTFVYVYEDGEWKINHHHSSIMPEGIVTAEPITKDEVRDLFQLWNGGEKCRSGKFAVGVRRLSN	100	1e-122	gi|397579950|gb|EJK51397.1|	hypothetical protein THAOC_29434 [Thalassiosira oceanica]	-	-	-	-	142	2e-42	COG4875	Uncharacterized protein	S	Function unknown	-	GO:0006468//protein phosphorylation	GO:0005516//calmodulin binding;GO:0004683//calmodulin-dependent protein kinase activity	-
29	EJK65231.1	hypothetical protein THAOC_13937 [Thalassiosira oceanica]	19440.5	0.075	1	1	1.42	0.12	0.003884	EJK65231.1	MQLSCACTRKYGDAPEVIITGRLDMTFPYVPTHLHYIMLELLKNSMRATVEHHGVDADYPPIKVVIADGSDNEDVIIKVSDEGGGIPRSNMKRIWSYLFTTADPEIQEGMVAFNENVDHSIDSPLAGLGYGLPISRSYARYFGGDLSIMSMEGYGTDCFVYLTRLGDTKEPLPI	100	5e-128	gi|397619340|gb|EJK65231.1|	hypothetical protein THAOC_13937 [Thalassiosira oceanica]	58.72	2e-57	sp|Q9SBJ1|PDK_ARATH	[Pyruvate dehydrogenase (acetyl-transferring)] kinase, mitochondrial OS=Arabidopsis thaliana GN=PDK PE=1 SV=1	57.8	2e-08	COG2205	K+-sensing histidine kinase KdpD	T	Signal transduction mechanisms	K00898|1|6e-60|193|ppp:PHYPADRAFT_150534| pyruvate dehydrogenase kinase 2/3/4 [EC:2.7.11.2]	GO:0023014//signal transduction by phosphorylation;GO:0000160//phosphorelay signal transduction system;GO:0018106//peptidyl-histidine phosphorylation	GO:0000155//phosphorelay sensor kinase activity;GO:0005524//ATP binding;GO:0004740//pyruvate dehydrogenase (acetyl-transferring) kinase activity	-
30	XP_002291423.1	predicted protein [Thalassiosira pseudonana CCMP1335]	94393	0.017	1	1	1.36	0.196	0.02529	XP_002291423.1	MNSLKERIVHIVDPTNPTHIPLFLPRISVSNADNEDIRPFQSTDDIDRVMDYANMPDPPQPCLVMHCEAPGSGIDDGEGDGTDGKDDDGGVVFPKRLAHLRGGYIFLCKPTIGQDDYGDGDGADKRGKIACIPLAGCTVEFPPGGRRVFREHAHTGARAGYSMAIHVKSLEVEKQQKTTCFIVLDSLSHREAWAAAIRMRCDVGNKVTVLRPGGMAGSRMMSVARDGYDQGYYNEKGHLATTYGSGVGNRQSKKPKHWGLRKSQQIDGGAGAGGGSGNADLDAALEQFGQPGFLEEKLVHQFLQQHAVNELPGECDKLEKWMDVIKNGLRGAVLEQYEYFVEASREMSTMGREVAWLRNLVERQQETLMSMKNIDFGAGLEDVEEGVGYEDGYGYLSDE…	100	0	gi|224003503|ref|XP_002291423.1|	predicted protein [Thalassiosira pseudonana CCMP1335]	-	-	-	-	-	-	-	-	-	-	-	-	-	-
31	EJK59156.1	hypothetical protein THAOC_20657 [Thalassiosira oceanica]	70312.1	0.032	1	1	1.26	0.11	0.01317	EJK59156.1	MTVHPKLQPRSPVPSDIEVSQQIVSEVGLLPIADLASEAGLEPDEVIPWGFSKAKVQLKTTLDRLKHSPDGNYIVCTGINPTPLGEGKSTTTIGLAQALGAILNKKSFACIRQPSQGPTFGIKGGAAGGGYAQVVPMEEFNLHLTGDIHAITAANNLLAAAIDTRMLHEDSQSDEALYKRLCLSGKPFPPVMKKRLVKLGIDPNKSPEDLTAEERAKFARLDFAKETITWQRVLDTCDRHLRKVTVGKGQTIQPRGTVKGETPREEHIRETGFDITVASEIMAVLALANDLPDLREKLGNMVVGYSKAGEPITSDDLGCGGALTVLMKDALLPTLMQTVERTPVLVHAGPFANIAIGNSSIVADKLALKLAGEDGYVVTEAGFGADIGMEKFFNIKCRE…	100	0	gi|397605931|gb|EJK59156.1|	hypothetical protein THAOC_20657 [Thalassiosira oceanica]	61.57	0	sp|P28723|FTHS_SPIOL	Formate--tetrahydrofolate ligase OS=Spinacia oleracea PE=1 SV=3	748	0	COG2759	Formyltetrahydrofolate synthetase	F	Nucleotide transport and metabolism	K01938|1|0.0|777|csl:COCSUDRAFT_52184| formate--tetrahydrofolate ligase [EC:6.3.4.3]	GO:0009396//folic acid-containing compound biosynthetic process;GO:0006730//one-carbon metabolic process	GO:0005524//ATP binding;GO:0004329//formate-tetrahydrofolate ligase activity	GO:0009536//plastid
32	CAA10621.1	PSI ferredoxin-binding protein II (chromoplast) [Skeletonema costatum]	15532.9	0.482	2	22	1.41	0.271	0.03907	CAA10621.1	MTLNLKTPFPTFGGSTGGWLRAAEVEEKYAITWTSAKEQIFEMPTGGSAIMRNGENLLYLARKEQCLALSTQLRTFKINDYKIYRIFPSGEVQYLHPKDGVFPEKVNPGRTSVNSRGFSIGKNPNPASIKFSGITTYES	100	9e-89	gi|14285687|sp|O96800.1|PSAD_SKECO	RecName: Full=Photosystem I reaction center subunit II; AltName: Full=Photosystem I 16 kDa polypeptide; Short=PSI-D (chloroplast) [Skeletonema costatum]	100	1e-89	sp|O96800|PSAD_SKECO	Photosystem I reaction center subunit II OS=Skeletonema costatum GN=psaD PE=3 SV=1	-	-	-	-	-	-	K02692|1|2e-65|198|ccp:CHC_665| photosystem I subunit II	GO:0015979//photosynthesis		GO:0009538//photosystem I reaction center;GO:0009535//chloroplast thylakoid membrane
33	EJK58596.1	hypothetical protein THAOC_21266, partial [Thalassiosira oceanica]	56483.2	0.017	1	1	1.62	0.149	0.0019	EJK58596.1	NIANPTINTGTDKKAGDAGEPGTLKTGSGDDKTGGSDDDDGPSEKNDSAIPKEDKPAEEVSKEEQQQPPKTKPFDPAATEPPDDQLDDKKIIQDTSELPPSYVGRVIGKGGEMIRDLQARSGCLRIDVDQNVPHNAPRIISYRGTRAKIEFAKKLVQRLCREDGNEAELPLGDASIKRVRVPANTIGKVIGRKGDMIRRLQHDSMAKIQVDHSNNQGHERTIVVTGMKDAVTKAEEMILFLTSNPLCDAAQSLAMLVGHKANSGKPWGSGPPYEGLPNNGIGMTEQCIPSHFGGGGYGNSVGGGGMVMPQQQTTINEFGNVVSAGYSNTSGNGGIECEVVPMPKFQMGRIIGQKGVTINDLQKRSGCDIQIDQKNAQPGQDCPVSIKGSRQGIEMAKKM…	100	0	gi|397604059|gb|EJK58596.1|	hypothetical protein THAOC_21266, partial [Thalassiosira oceanica]	25.47	3e-15	sp|Q96AE4|FUBP1_HUMAN	Far upstream element-binding protein 1 OS=Homo sapiens GN=FUBP1 PE=1 SV=3	-	-	-	-	-	-	K13210|1|5e-20|90.5|mpp:MICPUCDRAFT_23440| far upstream element-binding protein	-	-	-
34	EED89165.1	hypothetical protein THAPSDRAFT_42258 [Thalassiosira pseudonana CCMP1335]	41008	0.031	1	1	1.39	0.231	0.0299	EED89165.1	MESPPQRKEIYTYKAPWTVFSLAWSHRLEPNSQFRLAIGSYIEQYNNTVQVLKTRISLPHPTSEYSTVQIYSACEIEHPYPCTKILWSPEGKQQQHHQQGGNYGGRDLLATTGDYLRIWSVSEDESRGDGRLSHKREVLLNNNKNSEYCAPLTSFDWNEYDPSMIGTSSIDTTCTIWDVNTQTARTQLIAHDREVFDIAFSRGTDVFASVGADGSVRMFDLRSLEHSTIIYETPNLDPLLRLEWNKQDPNYLATFKVDSRSTLILDVRVPSTPVTELFGHNGCVNAVAWAPHSSCHICTAGDDSQALIWDLSKMAADRPVEDPILAYNAEGEVNNLQWSSSQPDWVSIAFSDKLQILRV	100	0	gi|224008941|ref|XP_002293429.1|	hypothetical protein THAPSDRAFT_42258 [Thalassiosira pseudonana CCMP1335]	57.88	4e-146	sp|P61963|DCAF7_MOUSE	DDB1- and CUL4-associated factor 7 OS=Mus musculus GN=Dcaf7 PE=1 SV=1	64.7	2e-09	COG2319	WD40 repeat	R	General function prediction only	K11805|1|7e-137|396|smo:SELMODRAFT_270223| WD repeat-containing protein 68	GO:0030154//cell differentiation;GO:0048731//system development	-	-
35	EJK60198.1	hypothetical protein THAOC_19503 [Thalassiosira oceanica]	81549	0.011	1	4	1.57	0.152	0.002815	EJK60198.1	MQSASSRIRPCPPPSSTLCHYHSTPSVRQDDVTQAKAASPKVEDLFQRIIFLDLVEVHLLAELINEKLGITVSDAERARMAKGGGGGAENKTEEDEEAAAPAEEKTAFDVKLTAFDAKSKIKVIKEIRAITGLGLKESKELVEGVPSTVKKDIKQEEADELKAKLEGLGATIEIIQCEELNLVRQFPTTHTHADEIKNMRVLDRLSAAVYLAFRPDRPAWQKHLLQLVARRLLEALQQPLPHGSQQRRLEVEVELARDGLDEEGPVADGKVRGGHEGVVAGRQFGLEVGVAVYPLGRWPGGGGQQLEDVVGHLVRARAVHPPPKVAEHVDLHLRDLLDRMHSARQSAHGLRVHQVGLANLRRDVESSYRAELELPPTPHDLPSSAGAGAEETVEEAHCL…	100	0	gi|397609052|gb|EJK60198.1|	hypothetical protein THAOC_19503 [Thalassiosira oceanica]	61.43	2e-18	sp|Q60A07|RL7_METCA	50S ribosomal protein L7/L12 OS=Methylococcus capsulatus (strain ATCC 33009 / NCIMB 11132 / Bath) GN=rplL PE=3 SV=1	90.5	1e-19	COG0222	Ribosomal protein L7/L12	J	Translation, ribosomal structure and biogenesis	K02935|1|5e-24|103|apro:F751_3749| large subunit ribosomal protein L7/L12	GO:0006412//translation	GO:0003735//structural constituent of ribosome	GO:0005840//ribosome
36	EED95751.1	propionate coa-transferase [Thalassiosira pseudonana CCMP1335]	47372	0.023	10	57	0.79	0.281	0.1595	EED95751.1	MLGDLATSNRIEAWTLPMGSISRMIRAQGTHSPGHITTVGLGTYVDPTPGVGTGGAANQLALDSPLNQELVTKLSIMGSDYLMYKALPIQVAIIRATTADSSGNLSFEHESLLCDQKNIAMAARNSGGVVLAQVKRLCAVGSLPSRSVGVPGAMVDCVCVVDEEDHDVFHRMSYTKRHDPVLCGEIKSPSDEVPKMPLDERKVIARRASFALKPGKVVNLGIGLPEGVASVAGEEGQLPFITLTTEPGVFGGLPASCQEFGPAVNADALVEMNQMFDYYDGGGLDMCFLGAAQISPQGDVNVSRMSQKKLIGPGGFINISQCTRNISFLCTFTAKGLSVDIDGDKGNLSIATEGKVKKFVNKVFETTFAGDEAVRRGQRVYYVTERAVFRRTANHRTIE…	100	0	gi|223992853|ref|XP_002286110.1|	propionate coa-transferase [Thalassiosira pseudonana CCMP1335]	41.57	1e-104	sp|F1CYZ5|CARA_ACEWO	Caffeate CoA-transferase OS=Acetobacterium woodii GN=carA PE=1 SV=1	404	6e-134	COG4670	Acyl CoA:acetate/3-ketoacid CoA transferase	I	Lipid transport and metabolism	-	GO:0046952//ketone body catabolic process	GO:0008260//3-oxoacid CoA-transferase activity	GO:0005739//mitochondrion
37	EJK63916.1	hypothetical protein THAOC_15401 [Thalassiosira oceanica]	83790.9	0.033	1	1	1.33	0.168	0.02009	EJK63916.1	MGDTGPCGPCSELHYDRIGNRDASSLVNEDDPDVIEIWNLVFIQFNRDENGLTPLPAKHIDTGMGLERLCSLLQDKSSNYDIDAFTPIFDEIERLAGVGGYEGKLGEEDSTLKDTAYRAVADHARTLTFALADGAVPDNEGRGYVLRRILRRATRYGQQILKCEPGFFAKLVPVVVETYGDAYPELKQNQANIIEIVKEEEEAFSTMLDRGIKYFEEEINDSKSKIVSGGQAFFLYDTLGFPIDLTELMAEEAGMSVDMKGFEGEMEGQKKRSRDARLASKGLAGERLEFIAEQTAWLADEGIAVTDDSAKYLWDEGLESSVRAIFTADGFLKEGDAAEAGNTVGLVLDKSSFYAEAGGQDADIGTISFDGGEVVVNDVQVYGGYILHSGVISEGTLSV…	100	0	gi|397616293|gb|EJK63916.1|	hypothetical protein THAOC_15401 [Thalassiosira oceanica]	48.12	0	sp|P36428|SYA_ARATH	Alanine--tRNA ligase OS=Arabidopsis thaliana GN=ALATS PE=1 SV=3	501	2e-163	COG0013	Alanyl-tRNA synthetase	J	Translation, ribosomal structure and biogenesis	K01872|1|0.0|674|fve:101294552| alanyl-tRNA synthetase [EC:6.1.1.7]	GO:0006419//alanyl-tRNA aminoacylation	GO:0004813//alanine-tRNA ligase activity;GO:0003676//nucleic acid binding;GO:0005524//ATP binding	GO:0005737//cytoplasm
38	EJK69564.1	hypothetical protein THAOC_09164 [Thalassiosira oceanica]	21005.3	0.046	1	4	1.33	0.198	0.03483	EJK69564.1	MAAESEVSFSELDGSGVRIGVLRTRWNDEHVSNLVDGIKAGCAECKVEPDNIFVKEVPGAYELPYAARLLAMSGTVDAIVCCGVLIKGETLHFEYISDAVSAGIMDVSLGTMTPVVYGVLNCLDEEQVMKRSSNLNGGHNHGEDWGKTAVEMALMRKEAFGKKVDGKPKELAAMGFNSVASEKEGADTKAPGFF	100	4e-142	gi|397629939|gb|EJK69564.1|	hypothetical protein THAOC_09164 [Thalassiosira oceanica]	40.11	1e-41	sp|Q9UVT8|RIB4_MAGO7	6,7-dimethyl-8-ribityllumazine synthase OS=Magnaporthe oryzae (strain 70-15 / ATCC MYA-4617 / FGSC 8958) GN=MGG_04626 PE=1 SV=1	114	1e-30	COG0054	6,7-dimethyl-8-ribityllumazine synthase (Riboflavin synthase beta chain)	H	Coenzyme transport and metabolism	K00794|1|3e-50|165|cme:CYME_CMI238C| 6,7-dimethyl-8-ribityllumazine synthase [EC:2.5.1.78]	GO:0009231//riboflavin biosynthetic process	GO:0004746//riboflavin synthase activity	GO:0009349//riboflavin synthase complex
39	XP_002293976.1	predicted protein, partial [Thalassiosira pseudonana CCMP1335]	18979.5	0.091	1	1	1.43	0.1	0.002074	XP_002293976.1	MSYYGNASATPSTAAAHLASNIDAAKIFVGGLSWQTTEETLRYHFEQYGEVSSVEVMRDRNTGDPRGFAFVVFKSDETVELILNSGPQEINHKVVDIKRAQARGVAPPSIHGAEDASVSSGGGQTNTRFKQEGNSLLSPEQLKNKIFVGGLPLHVDKDGMKDFFSVFGVVTDAIVM	100	4e-129	gi|224010036|ref|XP_002293976.1|	predicted protein [Thalassiosira pseudonana CCMP1335]	40.26	5e-28	sp|Q8W034|RNP1_ARATH	Heterogeneous nuclear ribonucleoprotein 1 OS=Arabidopsis thaliana GN=RNP1 PE=1 SV=1	65.1	2e-12	COG0724	RNA recognition motif (RRM) domain	J	Translation, ribosomal structure and biogenesis	K14411|1|2e-29|115|zma:100382683| RNA-binding protein Musashi		GO:0003676//nucleic acid binding;GO:0000166//nucleotide binding	-
40	EED95973.1	predicted protein, partial [Thalassiosira pseudonana CCMP1335]	28558.4	0.092	2	3	1.23	0.116	0.02325	EED95973.1	LNSKRALVTGGTKGIGAAIVTQLSALGCNVLTCARNGDELADRLYEWNDQHGLNVHGVVADVSTPEGREILKKEVEERFGGRLDILVNNVGTNIRKPTAEYSSEDLDFLMKTNLESVFELTKMCYPYLKRPKGHDATSVVNIGSVAGVTCIKSGSIYAMTKAAMNQLTGNLACEWGPDGIRVNCVTPWYINTPLAKQVLKNEAYKASVLERTPLQRVGEPFEVASLVGFLCTAAAGYITGQVISVDGGFTRNGYYDSFYP	100	0	gi|223993297|ref|XP_002286332.1|	predicted protein [Thalassiosira pseudonana CCMP1335]	54.23	1e-91	sp|Q9LHT0|TRNHF_ARATH	Tropinone reductase homolog At5g06060 OS=Arabidopsis thaliana GN=At5g06060 PE=2 SV=1	260	9e-86	COG1028	NAD(P)-dependent dehydrogenase, short-chain alcohol dehydrogenase family	IQR	Lipid transport and metabolism;Secondary metabolites biosynthesis, transport and catabolism;General function prediction only	K08081|1|1e-96|287|bdi:100837602| tropinone reductase I [EC:1.1.1.206]	GO:0055114//oxidation-reduction process	GO:0016491//oxidoreductase activity;GO:0000166//nucleotide binding	-
41	EED89316.1	hypothetical protein THAPSDRAFT_29850 [Thalassiosira pseudonana CCMP1335]	55250.1	0.116	5	6	1.53	0.037	5.044e-05	EED89316.1	MVFAAASAATRRAFAPRAAQNALRSMSTKGRADLLAGSGAYGGLSDQDRIFTNLYGEQDWRLKDALKRGDYHLTKEMMWMGPDWIVQEIKDSGLRGRGGAGFPSGLKWSFMPKESDGRPSFLVVNADESEPGTCKDREIMRKDPHKLIEGCLIAGYAMRARAAYIYIRGEYFNEAVVLDEAIHEAYAAGLIGKNACGSGYDFDVYLHRGAGAYICGEETALIESLEGRQGKPRLKPPFPAGVGLFGCPSTVTNVETVAVSPTILRRGASWFAGFGNPNNRGTKLFAISGHVKNPIVVEESMSIPLQELIEKHCGGMRNGWDTLQACIPGGSSVPVLNKAQCDEALMEFDDLRAKGSGLGTAAVTMFDNSVDMVGAIRRLSHFYKHESCGQCTPCREGTS…	100	0	gi|224009243|ref|XP_002293580.1|	hypothetical protein THAPSDRAFT_29850 [Thalassiosira pseudonana CCMP1335]	74.81	0	sp|Q9FNN5|NDUV1_ARATH	NADH dehydrogenase [ubiquinone] flavoprotein 1, mitochondrial OS=Arabidopsis thaliana GN=At5g08530 PE=2 SV=1	628	0	COG1894	NADH:ubiquinone oxidoreductase, NADH-binding 51 kD subunit (chain F)	C	Energy production and conversion	K03942|1|0.0|623|mis:MICPUN_94594| NADH dehydrogenase (ubiquinone) flavoprotein 1 [EC:1.6.5.3 1.6.99.3]	GO:0055114//oxidation-reduction process	GO:0051287//NAD binding;GO:0051539//4 iron, 4 sulfur cluster binding;GO:0008137//NADH dehydrogenase (ubiquinone) activity;GO:0010181//FMN binding	-
42	EJK46828.1	hypothetical protein THAOC_34493 [Thalassiosira oceanica]	13512.9	0.131	1	1	1.67	0.436	0.03351	EJK46828.1	MEEERRNWDKIGANMNNIRTKTLIKDADIVVVRYRQWNAAFDAGYAAALGKSIITRESPRLRVFHPPEISHMLKEVNASASADANQVVDTLAYVINGDLPEPRDGGDWLPIADRLGAGNPNP	100	7e-76	gi|397569573|gb|EJK46828.1|	hypothetical protein THAOC_34493 [Thalassiosira oceanica]	-	-	-	-	-	-	-	-	-	-	-	-	-	-
43	EJK45556.1	hypothetical protein THAOC_35826 [Thalassiosira oceanica]	33519.8	0.096	1	1	1.32	0.107	0.006513	EJK45556.1	MKLQIVASLLSTAALVDAFSTSASIRASSTTSLYERKPFISGNWKLNPQSKDEAVALASGIAGSITESSPDAEVALFVPYVFIESAQSAVGGKLSIGAEGVCPQGNGAYTGAISAPMLNSIGVNWVLAGHSERREIFGETDEYINEQCLKIIDEGMSVMLCIGESLAEFEQDLAGSVCAVQLKKGLKGIKKEDLGRVAIAYEPVWAIGTGKVATPEIAQSVHETCRSIIAKIYDDEAAQDMRILYGGSVSPESVDDLMKQPDIDGALVGGASLDSDKFGRIINFQKRFMVTDGMQQLWDPRSASSSRTKCSGG	100	0	gi|397567387|gb|EJK45556.1|	hypothetical protein THAOC_35826 [Thalassiosira oceanica]	43.25	3e-68	sp|A5G381|TPIS_GEOUR	Triosephosphate isomerase OS=Geobacter uraniireducens (strain Rf4) GN=tpiA PE=3 SV=1	223	2e-70	COG0149	Triosephosphate isomerase	G	Carbohydrate transport and metabolism	K01803|1|2e-58|192|gmx:100812398| triosephosphate isomerase (TIM) [EC:5.3.1.1]	GO:0008152//metabolic process	GO:0004807//triose-phosphate isomerase activity	-
44	EJK53475.1	hypothetical protein THAOC_27089 [Thalassiosira oceanica]	45782.6	0.051	1	1	1.22	0.119	0.02914	EJK53475.1	MRPTGFVTAVLLAAASCSAFAPRQSASSIGHDPTAAPIETRLCMNKKKKSSRKKTGGKGFGGGGSVSALTSPSDDFPVMPKAKPNFRYAGTIRPGAQSARRIVPTDRINKIPDYANDGIPRNRPALFPWVIETKSPDEIEKMRASGRCAREVLDMAGRAVKPGVTTDEIDRLVHELSIENGAYPSPLNYHNFPKSCCTSVNEVICHGIPDNRPLEEGDIVNIDITCYLNGYHGDCSEMFVVGGEAALDNKGRRLIHSRFAHIDCWVQALNFVKPGNDYKDIGAIIEDHVVEQGFTTVKSFCGHGYLHYRNSEPAGKMAAGHTFTIEPMICEGSADYLLWDDEWTATTRDGGRSAQFEHTLLITPDGVEALTGKIETSPVQFWERESEFHNGVWLGTSAS…	100	0	gi|397586018|gb|EJK53475.1|	hypothetical protein THAOC_27089 [Thalassiosira oceanica]	49.02	6e-94	sp|Q9SLN5|MAP1A_ARATH	Methionine aminopeptidase 1A OS=Arabidopsis thaliana GN=MAP1A PE=1 SV=1	260	4e-83	COG0024	Methionine aminopeptidase	J	Translation, ribosomal structure and biogenesis	K01265|1|2e-110|332|gsl:Gasu_15170| methionyl aminopeptidase [EC:3.4.11.18]	GO:0009987//cellular process;GO:0006508//proteolysis	GO:0046872//metal ion binding;GO:0008235//metalloexopeptidase activity;GO:0004177//aminopeptidase activity	-
45	ABF60361.1	ribulose-1,5-bisphosphate carboxylase/oxygenase large subunit, partial (chloroplast) [Thalassiosira minuscula]	54140.2	0.28	1	1	1.67	0.045	3.834e-05	ABF60361.1	SERTRIKSDRYESGVIPYAKMGYWDASYTVKDTDVLALFRITPQPGVDPVEAAAAVAGESSTATWTVVWTDLLTACERYRAKAYRVDPVPNATDQYFAFIAYECDLFEEASLSNLTASIIGNVFGFKAISALRLEDMRIPHSYLKTFQGPATGIIVERERLNKYGTPLLGATVKPKLGLSGKNYGRVVYEGLKGGLDFLKDDENINSQPFMRWRERFLNCLEGINRASAATGEVKGSYLNITAATMEEVYKRAEYAKAIGSVIVMIDLVMGYTAIQSIAYWARENDMLLHLHRAGNSTYARQKNHGINFRVICKWMRMSGVDHIHAGTVVGKLEGDPLMIKGFYDILRNTELEVNLPYGIFFEMDWASLRRCMPVASGGIHCGQMHQLIHYLGDDVVLQ…	100	0	gi|98990599|gb|ABF60367.1|	ribulose-1,5-bisphosphate carboxylase/oxygenase large subunit, partial (chloroplast) [Thalassiosira minuscula]	98.14	0	sp|A0T0N6|RBL_THAPS	Ribulose bisphosphate carboxylase large chain OS=Thalassiosira pseudonana GN=rbcL PE=3 SV=1	785	0	COG1850	Ribulose 1,5-bisphosphate carboxylase, large subunit, or a RuBisCO-like protein	G	Carbohydrate transport and metabolism	K01601|1|0.0|811|cme:CymeCp013| ribulose-bisphosphate carboxylase large chain [EC:4.1.1.39]	GO:0019253//reductive pentose-phosphate cycle;GO:0009853//photorespiration;GO:0055114//oxidation-reduction process	GO:0016984//ribulose-bisphosphate carboxylase activity;GO:0004497//monooxygenase activity;GO:0000287//magnesium ion binding	GO:0009507//chloroplast
46	EJK62217.1	hypothetical protein THAOC_17180 [Thalassiosira oceanica]	43344	0.059	2	4	1.54	0.252	0.01497	EJK62217.1	MVECVYSLAGQVHNQGSSALRFVDRDEVIASAVALGCVYVGQSERFRFLAMPLQNAPRLMHRYNHFAATRYLEFFDVSILKSQALRIALSSDLSARASANGFSGRQMPVKRRLHACGRKMAERHALQCFSTSSVEVLKELSGRGDSAFLTAPSRVGSRRPRQLQARSHGDDDATRPLAFLPERQPDELSSVNRRRAVSTMLATSALLPSAAMAEEENIFAPKFVQEYPDFTITDEGWAYKEVKIGNKDDGKGDLVDGDRVVFDWSGYTIGYFGRPFEAKGGPQGGAFDKDLDYFRTVIGSKTLIMGLECALRGMKVGGIRQVIIPYGPLGYPDYDREHDQIGPKPTTFSGMRALNFVLDNPRVDRTLLFNVKLVRVDRGDGKGGFVRGN	100	0	gi|397613436|gb|EJK62217.1|	hypothetical protein THAOC_17180 [Thalassiosira oceanica]	45.86	1e-32	sp|Q9LYR5|FKB19_ARATH	Peptidyl-prolyl cis-trans isomerase FKBP19, chloroplastic OS=Arabidopsis thaliana GN=FKBP19 PE=1 SV=1	-	-	-	-	-	-	-	GO:0044267//cellular protein metabolic process	GO:0016853//isomerase activity	-
47	EED89721.1	predicted protein [Thalassiosira pseudonana CCMP1335]	40637.6	0.03	1	2	1.48	0.262	0.02354	EED89721.1	MIRAALGRSTVERTPVWLFRQAGRHLPEYQEYKQKTGRSFLDMLSYPEDVAECTMQPVRRYDVDAAILFSDILVIAEAMNVKVTMPGGVGIQVPAPICGPADMKERLPAAEELNEQFVLERLGHVIESVKLIRTQMRKEDISIPLIGFSAAPWTLMYYMVGGSSKKNTHIGIEWLNEHPEASTKLMDMLTTVVIEYMSEQVKAGAHMLQLFEAMGMMIDEPNFNKFAMPALEKISKELKSRYPDVPLMVFARGASFANEQLSKLGYDVVTIDGSVDRSTARDVVGGRAGLQGNYDPRELIADHDGGRTKETVRKTTRELLEALGPQRLIANLGEGLGGKESTELVNEFVKAVHEESEKMIDSAE	100	0	gi|224008602|ref|XP_002293260.1|	predicted protein [Thalassiosira pseudonana CCMP1335]	42.62	1e-90	sp|Q2S1W0|DCUP_SALRD	Uroporphyrinogen decarboxylase OS=Salinibacter ruber (strain DSM 13855 / M31) GN=hemE PE=3 SV=1	286	6e-93	COG0407	Uroporphyrinogen-III decarboxylase	H	Coenzyme transport and metabolism	K01599|1|3e-143|413|olu:OSTLU_31578| uroporphyrinogen decarboxylase [EC:4.1.1.37]	GO:0006779//porphyrin-containing compound biosynthetic process	GO:0004853//uroporphyrinogen decarboxylase activity	-
48	EJK46367.1	hypothetical protein THAOC_34966 [Thalassiosira oceanica]	72332.7	0.037	2	5	1.22	0.09	0.01307	EJK46367.1	MTEEGAPPPRPVVICGPSGVGEYYSYLSAKVSCLGRLTELFCAGRRGKGTLIELLQKHFAEAHPSEASKFGFSVSHTTRKPRDGEQHGVHYNFTTVDDIKKEISEGKFVEYAEVHGNYYGTSVESVESVLSKGKICLLDIDIQGAQNVKKSSLDAYYIFISPPSMEELERRLRGRGTEKEESILKRLKNAKSEMDYGTEDNFDKVLVNNDLQQTLEDLVELFSKWFPSLLAESNGVENGNLMPPVVDPLSYPKNDEGLRALLSAIDEDCPLEGYVQTELNYKAANVKIPAGKTLDIPLPPVEHNGSKIEWSVTLVDEYNESLDLDFGLVVVVEGNEVECRKKGRIVAPANVEKEGNDDATSETDVGDDADGDQQVVSAKGKFTVANSAPVTVILKLDNS…	100	0	gi|397568826|gb|EJK46367.1|	hypothetical protein THAOC_34966 [Thalassiosira oceanica]	52.56	1e-49	sp|Q2QPW1|GMK1_ORYSJ	Guanylate kinase 1 OS=Oryza sativa subsp. japonica GN=GK1 PE=2 SV=2	163	7e-45	COG0194	Guanylate kinase	F	Nucleotide transport and metabolism	K00942|1|7e-51|179|ota:Ot12g01990| guanylate kinase [EC:2.7.4.8]	GO:0009987//cellular process	GO:0016740//transferase activity	-
49	XP_002289013.1	predicted protein [Thalassiosira pseudonana CCMP1335]	72570.9	0.027	2	2	1.25	0.155	0.03797	XP_002289013.1	MAAYTILSSNRVGPGTYYRISHPSISTKTPMTFGLFVPSRHEKEDVPAMFWLSGLTCDDTNFAMKAGGMAFLAAEKEGIAIVMPDTSPRAGFYVNATREPYSTHYQMYTYVTEELPALLQKEFSIGKTRSISGHSMGGHGALTVAIKNPSDWVSVSAFSPICNPTACPWGEKAFTAYLGSVEAGKDHDATALLSVMTEPTKFDNILIDQGTSDEFLAKNQLLPEKLVEAASKCGQKVSLNMREGFDHSYYFIASFIEDHVAFHGQHLRKKQAELLVIASSMYDFSATVGKPIECNAMVARGPKQPLTLEKITVGTPKAGEVRVKVMANALCHTDVYTLDGHDPEGIFPCILGHEAGCVVESVGEGVESVKPGDHVIPCYTPQCAKSSCIFCMSPKTNLC…	100	0	gi|223998680|ref|XP_002289013.1|	predicted protein [Thalassiosira pseudonana CCMP1335]	60.05	1e-147	sp|P80572|ADHX_PEA	Alcohol dehydrogenase class-3 OS=Pisum sativum PE=1 SV=1	466	5e-159	COG1062	Zn-dependent alcohol dehydrogenase	R	General function prediction only	K00121|1|0.0|802|mis:MICPUN_56654| S-(hydroxymethyl)glutathione dehydrogenase / alcohol dehydrogenase [EC:1.1.1.284 1.1.1.1]	GO:0006069//ethanol oxidation	GO:0018738//S-formylglutathione hydrolase activity;GO:0008270//zinc ion binding;GO:0051903//S-(hydroxymethyl)glutathione dehydrogenase activity;GO:0000166//nucleotide binding	GO:0016023//cytoplasmic membrane-bounded vesicle
50	EJK73442.1	hypothetical protein THAOC_04931 [Thalassiosira oceanica]	29011.6	0.105	1	1	1.31	0.096	0.005182	EJK73442.1	MILCTSLLLALVGTSSAFVSQSQATTRARSQCTSLQANIAVFGASGLTASECVYQALKDGDNVVGLTRNPSNLKVPKGSGGADAENPLVDEKLTLIGGDVTKMSDVEKAVFENDIDGVIVALGGKTSDVGDTMLTDGTNNIIAAMKDKGVKRLCVVTSIGAGDSKDQAPFAFKLLMMTVMKKIFTDKNNQEKAVEESGLEYCIVRPGGLTVDAPTGVINVIDGEAGSIPRADVAQFCLGAVKDPDFAYINKAPCISSVGGTSWVKDRSKAARGEM	100	0	gi|397639203|gb|EJK73442.1|	hypothetical protein THAOC_04931 [Thalassiosira oceanica]	30.77	4e-14	sp|P52556|BLVRB_BOVIN	Flavin reductase (NADPH) OS=Bos taurus GN=BLVRB PE=1 SV=2	128	2e-34	COG0702	Uncharacterized conserved protein YbjT, contains NAD(P)-binding and DUF2867 domains	R	General function prediction only	-		GO:0000166//nucleotide binding	-
51	XP_002292633.1	predicted protein [Thalassiosira pseudonana CCMP1335]	49725.5	0.042	2	2	1.42	0.071	0.000741	XP_002292633.1	MFKIRTSKYRHVYCDPPKTEACHTGFRLSTVTGDQQYIKASSKYFAVALFGGGGQVYVGRHDRPGRFQAGHTPTLHGHSGAITDFEWNPFDDSMLATSSEDTTIKIWNIPEEWEPIDGSGSSKGGEDITESLVDLVGHSKKVSLIRFHPTANNVLASTGSDYTVKIWDIERAMEMSTFTDMQDLCQDIVWDYKGDNYATSCKDKAVRFVDARAASVTAKIEQAHDGVKGVKVCYMGETGKILTTGHSRQSGREVKIWDMSNLSKPIATEKIDTAAGVLMPMYDQDTNVIYLCGKGDGNIRTCEFEDKEPYFHKLNEGFRSTTALKGVCMVPKRSLDIMGCESVRLLKVTNEAGVQPLSFVVPRKSDAFQPDIFPNTASSIPAHSAEEWAAGSSKPPKTM…	100	0	gi|224007347|ref|XP_002292633.1|	predicted protein [Thalassiosira pseudonana CCMP1335]	38.95	2e-101	sp|Q9XS70|COR1B_RABIT	Coronin-1B OS=Oryctolagus cuniculus GN=CORO1B PE=1 SV=1	82.4	5e-15	COG2319	WD40 repeat	R	General function prediction only	K18643|1|5e-11|68.9|cre:CHLREDRAFT_80954| katanin p80 WD40 repeat-containing subunit B1!K04508|2|1e-10|67.4|nnu:104607425| transducin (beta)-like 1!K14963|5|4e-10|65.1|bpg:Bathy14g02550| COMPASS component SWD3	-	-	-
52	XP_002287818.1	aldehyde dehydrogenase [Thalassiosira pseudonana CCMP1335]	48340.6	0.024	1	1	1.89	0.499	0.01961	XP_002287818.1	MGRDEAKAAIERASDALPDWKDTTGLHRSGILSKWSALIKENSEDIATIMTLESGKPLQESHGEVAYGTSFLDYYAAEAIRSNSAGGGTLIPTPFTVAGSTSPRGKIMAVNEAVGVCALITPWNFPIALITRKAGPALAAGCTTVLKPSELTPLTALALQNLATEAGVPEGVFELVTADADINREVGDEFCTNPIVKKISFTGSTPVGKLLMKLSSDTVKRMSLELGGNAPFIVFKDADIDLAVNAAMASKFRNAGQTCVCADRFIIHKSVEEEFVEKLTDKVKQITVGHGMKEGVAMGPLISSKAVQKLKEEVDEALAENAKCVVGGSPLTDLGPHFFEPTILTNVSPKSIIWCAENFGPVVAVTTFETEDEALALANDTTSGLASYFCTQDMARVLR…	100	0	gi|223996289|ref|XP_002287818.1|	aldehyde dehydrogenase [Thalassiosira pseudonana CCMP1335]	50.78	4e-156	sp|Q9I6M5|DAVD_PSEAE	Glutarate-semialdehyde dehydrogenase DavD OS=Pseudomonas aeruginosa (strain ATCC 15692 / DSM 22644 / CIP 104116 / JCM 14847 / LMG 12228 / 1C / PRS 101 / PAO1) GN=davD PE=1 SV=1	478	5e-165	COG1012	Acyl-CoA reductase or other NAD-dependent aldehyde dehydrogenase	C	Energy production and conversion	K17761|1|2e-151|443|gra:105782967| succinate-semialdehyde dehydrogenase, mitochondrial [EC:1.2.1.24]	GO:0050896//response to stimulus;GO:0055114//oxidation-reduction process	GO:0016620//oxidoreductase activity, acting on the aldehyde or oxo group of donors, NAD or NADP as acceptor	GO:0043231//intracellular membrane-bounded organelle;GO:0044444//cytoplasmic part
53	XP_002288025.1	predicted protein [Thalassiosira pseudonana CCMP1335]	15444	0.054	1	7	1.63	0.417	0.03488	XP_002288025.1	MKLAVIAALVSSAAAFAPNAQPAAQTALNAESDRRSFLGAAAAFGAAALPLAANAVVDYENVALLGGSQTVDLNNANVRAYLRMPGMYPAAAGKIVTHGPYKSVADVYNIPGLTNAEKEVIKKYESRFTAKAVAPEYAIDRINNGLYR	100	1e-63	gi|223996703|ref|XP_002288025.1|	predicted protein [Thalassiosira pseudonana CCMP1335]	67.03	2e-40	sp|Q84XB6|PSBU_PHATR	Photosystem II 12 kDa extrinsic protein, chloroplastic OS=Phaeodactylum tricornutum GN=psbU PE=3 SV=1	93.6	2e-23	COG1555	DNA uptake protein ComE and related DNA-binding proteins	L	Replication, recombination and repair	K02719|1|3e-33|118|gsl:Gasu_27020|	GO:0042549//photosystem II stabilization;GO:0022900//electron transport chain		GO:0019898//extrinsic component of membrane;GO:0009535//chloroplast thylakoid membrane;GO:0009654//photosystem II oxygen evolving complex
54	XP_002286779.1	predicted protein [Thalassiosira pseudonana CCMP1335]	16425.2	0.068	1	3	1.72	0.386	0.01935	XP_002286779.1	MKTSLIATLTLLSHSATAFAPQARNTFTRAMSANAVPLANGAMSFDRVCREWRCKYEGDKATSESLEAIAKLVEEYLPEVKKASKDVKVNRLVCGGCLDFKLMTTVPLDDFGPWEASGFAPEAEFLEKLKAIDGVSQVETQTITNMEI	100	2e-107	gi|223994191|ref|XP_002286779.1|	predicted protein [Thalassiosira pseudonana CCMP1335]	-	-	-	-	-	-	-	-	-	-	-	-	-	-
55	EJK44963.1	hypothetical protein THAOC_36458 [Thalassiosira oceanica]	18162.2	0.105	2	5	1.56	0.218	0.007538	EJK44963.1	MSSLLSGMGMPGGGAPPSPEELQKSMEQFSSMLSSPQFKEMLNDPEKLEVQLETMRQSLLGALQEMEKGDNPMMKMMMEQMKQQLASSFPGGWDGLKAMIEDPAQWKEMMGGLVEVVKNMGEEEWAQIMGQMGGGMPGMGGGMSGMGGMGGMPNLGDTAGTLAGLDDLAED	100	8e-70	gi|397566219|gb|EJK44963.1|	hypothetical protein THAOC_36458 [Thalassiosira oceanica]	-	-	-	-	-	-	-	-	-	-	-	-	-	-
56	XP_002290343.1	hypothetical protein THAPSDRAFT_22822 [Thalassiosira pseudonana CCMP1335]	13136.5	0.041	1	3	1.55	0.287	0.02043	XP_002290343.1	MSAEEVAKAFVAHFYQAFDTGVDGLAGLYSPSSMLTFEGQQVQGSEAIIAKLRGVGQVKHQVKTTDIQPSNDPNAIVIFVTGAIQIGGDNPLHFCEFFHLVGTGPGQYYVHNDVFRLNYGL	100	1e-85	gi|224001342|ref|XP_002290343.1|	hypothetical protein THAPSDRAFT_22822 [Thalassiosira pseudonana CCMP1335]	48.78	9e-37	sp|Q9C7F5|NTF2_ARATH	Nuclear transport factor 2 OS=Arabidopsis thaliana GN=NTF2 PE=1 SV=1	-	-	-	-	-	-	K12669|1|2e-28|110|aly:ARALYDRAFT_334448| oligosaccharyltransferase complex subunit gamma!K20607|2|1e-12|66.6|cre:CHLREDRAFT_155835| mitogen-activated protein kinase kinase 3 [EC:2.7.12.2]	GO:0010363//regulation of plant-type hypersensitive response;GO:0015802//basic amino acid transport;GO:0006606//protein import into nucleus;GO:0015696//ammonium transport;GO:0043090//amino acid import;GO:0006820//anion transport;GO:0006862//nucleotide transport;GO:0006612//protein targeting to membrane;GO:0043069//negative regulation of programmed cell death;GO:0006888//ER to Golgi vesicle-mediat…	GO:0008536//Ran GTPase binding	GO:0005829//cytosol;GO:0005635//nuclear envelope;GO:0005886//plasma membrane
57	XP_002293997.1	succinate dehydrogenase flavoprotein subunit [Thalassiosira pseudonana CCMP1335]	69699	0.071	7	24	1.02	0.091	0.07924	XP_002293997.1	MLSAFARRASSKATKLASTAPTPTTAVRSLSTSTTGDYTIVDHTYDALVIGAGGSGLRAAMGLSEAGFKTACVSKLFPTRSHTVAAQGGINAALGNMGPDDWRWHMYDTVKGSDWLGDQDAIHYMCREAPKAVLELEEFGLPFSRTEEGKIYQRAFGGQSLDFGKGGQAHRCCAAADRTGHAMLHTLYGRSLAFDTTYFIEYFAMDLLMTPDGQCVGAMALNMEDGTLHRIKAKNTVLATGGYGRTYFSCTSAHTCTGDGNAMAMRAGLANQDAEFVQFHPTGIYGAGCLITEGCRGEGGILRNSEGERFMERYAPSAKDLASRDVVSRAMTMEIREGRGVGPKKDHCYLHLDHLPAELLAERLPGISETAAIFAGVDVTKEPIPVLPTVHYNMGGIPT…	100	0	gi|224010078|ref|XP_002293997.1|	succinate dehydrogenase flavoprotein subunit [Thalassiosira pseudonana CCMP1335]	74.14	0	sp|O82663|SDHA1_ARATH	Succinate dehydrogenase [ubiquinone] flavoprotein subunit 1, mitochondrial OS=Arabidopsis thaliana GN=SDH1-1 PE=1 SV=1	824	0	COG1053	Succinate dehydrogenase/fumarate reductase, flavoprotein subunit	C	Energy production and conversion	K00234|1|0.0|915|ppp:PHYPADRAFT_181904| succinate dehydrogenase (ubiquinone) flavoprotein subunit [EC:1.3.5.1]	GO:0022900//electron transport chain;GO:0006099//tricarboxylic acid cycle	GO:0050660//flavin adenine dinucleotide binding;GO:0008177//succinate dehydrogenase (ubiquinone) activity	-
58	XP_002295769.1	predicted protein [Thalassiosira pseudonana CCMP1335]	81303	0.023	1	4	1.3	0.168	0.03106	XP_002295769.1	MKFLSSTIAAAILATSSAFTTTLPRRTSSIQPTSTRLHDTTDNGPPYSGPASKPILDTVNYPHDMKRLDMKELKQLAHELRWELIEAVSKTGGHFSSSLGVIELTVALHYVFDMPEDDIIWDVAHQCYPHKMLTGRRDRFPTLRQLGGISGFCKRKESEYDSFGAGHSSTSISAAQGMSVAKSLLNKRKNNCIAVIGDGAITGGMAYEAMNNAGYLSSRMIVVLNDNGQVSLPTGTQTAGGVRPASQLSAYTSNLIVSKPFQDFRDFAKSLNRLFPENVQDVNKRLDEYARGLVTGGTVFEELGFFYVGPIDGHDLDNMVPILEKLRDSDSTKPVLLHIKTNKGQGYPPALAASDKMHGVGKFDIATGIQVKGKAASPSLTSIFANAMIDAATEDRAIV…	100	0	gi|224004236|ref|XP_002295769.1|	predicted protein [Thalassiosira pseudonana CCMP1335]	55.16	0	sp|B6IRB5|DXS_RHOCS	1-deoxy-D-xylulose-5-phosphate synthase OS=Rhodospirillum centenum (strain ATCC 51521 / SW) GN=dxs PE=3 SV=1	766	0	COG1154	Deoxyxylulose-5-phosphate synthase	HI	Coenzyme transport and metabolism;Lipid transport and metabolism	K01662|1|0.0|861|ccp:CHC_T00008758001| 1-deoxy-D-xylulose-5-phosphate synthase [EC:2.2.1.7]	GO:0016114//terpenoid biosynthetic process;GO:0009228//thiamine biosynthetic process	GO:0030976//thiamine pyrophosphate binding;GO:0000287//magnesium ion binding;GO:0008661//1-deoxy-D-xylulose-5-phosphate synthase activity	-
59	EJK74859.1	hypothetical protein THAOC_03437 [Thalassiosira oceanica]	25703.1	0.085	1	4	1.56	0.379	0.03497	EJK74859.1	MRMRLAAWLRLRCVTIHSFIHSFAHSFIHSFIYLLMIHDDDYSDGWESPPPSMIAFNICLAFLPSLLHSAGRWGEMLAVFKLIVKADPIEKEGRTIEQTRTSDMDPQQAAAAAPQMQFQPVQPPQQQPAPVASTVVSTSQPAAAAPAAAQPPAAQAPAAAATQAQGSIPTQAPSSSQVSSAPPVDKSMQALPIRAYLDQTVVPILLDGMSELVKERPPNPVEWLAGYLLRNDPQKK	100	1e-96	gi|397641804|gb|EJK74859.1|	hypothetical protein THAOC_03437 [Thalassiosira oceanica]	70.21	1e-16	sp|Q99LT0|DPY30_MOUSE	Protein dpy-30 homolog OS=Mus musculus GN=Dpy30 PE=1 SV=1	-	-	-	-	-	-	K14965|1|1e-15|75.9|mpp:MICPUCDRAFT_50851| protein dpy-30	GO:0008152//metabolic process	GO:0030170//pyridoxal phosphate binding;GO:0030151//molybdenum ion binding;GO:0003824//catalytic activity	-
60	AAZ74654.1	ribulose-1,5-bisphosphate carboxylase/oxygenase large subunit, partial (chloroplast) [Porosira pseudodenticulata]	52295.4	0.286	1	4	1.93	0.259	0.002284	AAZ74654.1	MSQSVSERTRIKSDRYESGVIPYAKMGYWDAAYTVKDTDVLALFRITPQPGVDPVEAAAAVAGESSTATWTVVWTDLLTACERYRAKAYRVDPVPNSTDVYFAFIAYECDLFEEGSLSNLTASIIGNVFGFKAVAALRLEDMRIPHSYLKTFQGPATGIIVERERLNKYGTPLLGATVKPKLGLSGKNYGRVVYEGLKGGLDFLKDDENINSQPFMRWRERFLNCMEGINRASAATGEVKGSYLNVTAATMEEVYKRAEYARVVGSVVVMIDLVMGYTAIQSIALWARENDMLLHLHRAGNSTYARQKNHGINFRVICKWMRMSGVDHIHAGTVVGKLEGDPLMIKGFYDVLRLTELEVNLPFGIFFEMDWASLRRCMPVASGGIHCGQMHQLIHYLGD…	100	0	gi|329343220|gb|AEB91239.1|	ribulose-1,5-bisphosphate carboxylase/oxygenase large subunit (chloroplast) [Porosira glacialis]	96.59	0	sp|O98945|RBL_DETCO	Ribulose bisphosphate carboxylase large chain OS=Detonula confervacea GN=rbcL PE=3 SV=1	752	0	COG1850	Ribulose 1,5-bisphosphate carboxylase, large subunit, or a RuBisCO-like protein	G	Carbohydrate transport and metabolism	K01601|1|0.0|814|cme:CymeCp013| ribulose-bisphosphate carboxylase large chain [EC:4.1.1.39]	GO:0019253//reductive pentose-phosphate cycle;GO:0009853//photorespiration;GO:0055114//oxidation-reduction process	GO:0016984//ribulose-bisphosphate carboxylase activity;GO:0004497//monooxygenase activity;GO:0000287//magnesium ion binding	GO:0009507//chloroplast
61	EJK66713.1	hypothetical protein THAOC_12343 [Thalassiosira oceanica]	59624.8	0.108	1	8	1.27	0.173	0.04256	EJK66713.1	MVSFRKKKSSKNVAKGGEPEAAAQDAKAPDDSRDPAPETKSSIPSRPPQMDDIPELIEIMTTEKGEKSAAATKRIYELCDVGHKQNRVPMVCSGKYDVLTPLAQCLTQESGDGRHLACLALNNLSIPTENKRVMALGPSSSAVIGGLCKVIAEDKQESYLCCICLMNLSFLEASITSMLQHSPGEGEVAPLDNPESLIRILEKLLKNAPAVPKSGSGKSEGVRWACGLIKNLAKSEENSALFGQTDIPKCVVGNLRNTTAPPGRWTSNSLEDFSLFVVLNLAQWPASREALVATGAIDVVKPIMSEGDLQGLKATMACAFLGAPWSDFPDGGSTAAKSISELMTNIIEKKGKDGQYAYGVFKLYTATKAYRDLSAAAAASPDVASAESNSKVLAVPSAV…	100	0	gi|397622528|gb|EJK66713.1|	hypothetical protein THAOC_12343 [Thalassiosira oceanica]	-	-	-	-	-	-	-	-	-	-	-	-	-	-
62	EED90561.1	hypothetical protein THAPSDRAFT_14727, partial [Thalassiosira pseudonana CCMP1335]	49212.8	0.022	1	1	1.93	0.339	0.005402	EED90561.1	ILIANRGEISIRISRAARALGARSVAVCAPEDVDSPHVGYADEFVVLERGENAIGPYLDVKGLTGVAVERGVDFVHPGYGFLSESAPFAQSLLSSNIEWVGPPPSVLELFGDKIQARALAQESGVPVVRGSGNLKSGEECLEILERGDFGLPAIMKAAYGGGGRGMRIVRSINDVLPSFSSCQREALTAFGRNEVFLEEFWEDTQHLEVQILADGHGGVVHLYERDCTVQHRHQKVIELAPARDIHPELRQRLVECAVTLAKECNYKGAGTVEFLVRGDLSSADAEFVFMEVNPRVQVEHTVTEEATGIDIVQAQLLIAGGRTLDDLGLLQENIGLRQHSLQARITMMPGKGEMLDFYQEPSGEGVRCDSAGWYTGFKPNQMYDPLVGKLICSAGDVTT…	100	0	gi|224005499|ref|XP_002291710.1|	hypothetical protein THAPSDRAFT_14727 [Thalassiosira pseudonana CCMP1335]	43.76	5e-114	sp|Q9KWU4|PYC_BACSU	Pyruvate carboxylase OS=Bacillus subtilis (strain 168) GN=pyc PE=3 SV=1	369	1e-115	COG1038	Pyruvate carboxylase	C	Energy production and conversion	K01958|1|3e-106|345|csl:COCSUDRAFT_26440| pyruvate carboxylase [EC:6.4.1.1]	GO:0008152//metabolic process	GO:0046872//metal ion binding;GO:0005524//ATP binding;GO:0004075//biotin carboxylase activity	-
63	EJK73166.1	hypothetical protein THAOC_05227, partial [Thalassiosira oceanica]	43924.9	0.093	2	3	1.36	0.145	0.01104	EJK73166.1	MPERPAPATSPPSSGEELQPEQKRLCKNHHKGDEASPVHRGANMGSVSVGARSFRRALCVARWTPGLHARSICSRTPVLLDETKPLNYDVVPKGDMGEFQEYSVIFTNRALNLMSAPFQTVMRDLNSLLKKTYNAHQVAILPGSGTFGMEAVARQFATDEHVMVIRNGWFSFRWTEILDMGRICKSHSVLKAQPVPQEDSGCPHVQYAPYPIDDVVDRVLEERPAVLFAPHVETSTGMILPDDYIRKAAAAVHEVGGIFVLDCIASGAIWADMEDLGVDSIISAPQKGWTGPACAALVMLSERATEKMAVTHETSFSMSLKRWSAIMDTYEKGGFGYHTTMPTDGLRDFHEISVETLKFGLPELKVAQYELGSEARYLLHSRGLTSVAAPGLRSTGG	100	0	gi|397638669|gb|EJK73166.1|	hypothetical protein THAOC_05227, partial [Thalassiosira oceanica]	26.87	9e-13	sp|Q183T0|PHNXW_PEPD6	Bifunctional phosphonoacetaldehyde hydrolase/aminoethylphosphonate transaminase OS=Peptoclostridium difficile (strain 630) GN=phnXW PE=3 SV=1	357	6e-120	COG0075	Archaeal aspartate aminotransferase or a related aminotransferase, includes purine catabolism protein PucG	EF	Amino acid transport and metabolism;Nucleotide transport and metabolism	K00830|1|3e-07|56.2|csl:COCSUDRAFT_23313| alanine-glyoxylate transaminase / serine-glyoxylate transaminase / serine-pyruvate transaminase [EC:2.6.1.44 2.6.1.45 2.6.1.51]	GO:0008152//metabolic process	GO:0030170//pyridoxal phosphate binding;GO:0004760//serine-pyruvate transaminase activity	-
64	XP_002293023.1	predicted protein [Thalassiosira pseudonana CCMP1335]	25187.5	0.048	1	1	1.71	0.448	0.029	XP_002293023.1	MVKSIVFSAVTACYLASNSVSAFTTTSSASSTVVRSTSSSTSLHATPNSRRELFLRTGSTLTTALLTTFATSSPAFAATTPPTAEEIERIKTGYQNIKFLLENWEKETTVCRENGGECKRDADAVRRYLGLRSTTDPLFQIEKVFAKVKYMDDIDEDKLEAFFEATEDWNTAMNMSNSMAFISQFGEYNPGGGKDEVLKYLNESQKQVILAEKALKTILDCVTSKAS	100	2e-118	gi|224008128|ref|XP_002293023.1|	predicted protein [Thalassiosira pseudonana CCMP1335]	-	-	-	-	-	-	-	-	-	-	-	-	-	-
65	EJK44401.1	hypothetical protein THAOC_37058 [Thalassiosira oceanica]	36902.7	0.127	1	6	1.25	0.127	0.02435	EJK44401.1	MYTTAVIFAAALRSAASFAPTVARRASTALRMADTDFDDFSSKVTFMFPGQGAQFVGMAEETCKTVPAAKALFDEASEILGYDLLDLCVSGPKEKLDSTVVSQPAIFVASMAAVEKLRQEEGQEAVDSATCTLGLSLGEYSALCFADAISFADGVKVTKARGEAMQAASDAIDTGMVSVIGLSKDVVEELCNKASEQSGEKVQLANLLCNGNYAVSGHMKACDTVAEIAKPDFKARMTVKLAVAGAFHTDFMAPAVDSLKEVLETIEIKKPRIPVVSNVDAKPHSDPAVIKELLAKQVTSPVLWEDSIASVLEGKGFEKAVELGPGKVTAGVLKRIDKSAACSNVGV	100	0	gi|397564922|gb|EJK44401.1|	hypothetical protein THAOC_37058 [Thalassiosira oceanica]	40.52	9e-70	sp|Q8IVS2|FABD_HUMAN	Malonyl-CoA-acyl carrier protein transacylase, mitochondrial OS=Homo sapiens GN=MCAT PE=1 SV=2	310	1e-103	COG0331	Malonyl CoA-acyl carrier protein transacylase	I	Lipid transport and metabolism	K00645|1|2e-140|405|csl:COCSUDRAFT_27235| [acyl-carrier-protein] S-malonyltransferase [EC:2.3.1.39]	GO:0008152//metabolic process	GO:0004314//[acyl-carrier-protein] S-malonyltransferase activity	GO:0005739//mitochondrion;GO:0009507//chloroplast
66	XP_002287792.1	predicted protein, partial [Thalassiosira pseudonana CCMP1335]	23278.4	0.042	1	1	1.4	0.232	0.03016	XP_002287792.1	MFTGIIEEMGQVLSLETKDNMTLWDGSKGSGTEMTVKGGVVMDGAYLGCSISVNGVCLTATELDFDNNIFKVGLAPETLRKTNLGSYGPSSEMTTVNLERASEIGGRNSGHFVQGHVDDVGTIVDQWIDENSLFFKISFPSEFMRYIVPKGFIAIDGTSLTVCDVTSEGEGGENWFTFMLVEYTQKKIILPSKKIGDTVNVEVDVLGKYSER	100	1e-154	gi|223996237|ref|XP_002287792.1|	predicted protein [Thalassiosira pseudonana CCMP1335]	46.73	3e-54	sp|A5DB51|RISA_PICGU	Riboflavin synthase OS=Meyerozyma guilliermondii (strain ATCC 6260 / CBS 566 / DSM 6381 / JCM 1539 / NBRC 10279 / NRRL Y-324) GN=RIB5 PE=2 SV=3	181	3e-56	COG0307	Riboflavin synthase alpha chain	H	Coenzyme transport and metabolism	K00793|1|7e-65|202|smo:SELMODRAFT_97172| riboflavin synthase [EC:2.5.1.9]	GO:0009231//riboflavin biosynthetic process;GO:0055114//oxidation-reduction process	GO:0004746//riboflavin synthase activity;GO:0016491//oxidoreductase activity	-
67	EJK49704.1	hypothetical protein THAOC_31388 [Thalassiosira oceanica]	41651.4	0.034	1	1	1.3	0.061	0.001469	EJK49704.1	MSEERKLLSCAARWRVLPQPHSPDHEIFRGGAASPRWAGSAVAFTSPSRHSAHPRAKTASLYLRNAAGDETTSSDSSDECRRTFLSRAATAAAIAGVPSRPAFAEGEQKSEAFESIAARAAKVNEEVINKENELMIKEEAAEQRKRELAQQIRDDPRTIYDFTLPVAGREVQVTDLVGQTFETVGEEGSTKKIGSKVKAILVVNIKQDDPIARKNIPELIALASKFGKSGEFAVIISPTDQGYFEADTSVLLRLKVQSEYGWGSTPGTILTDKVNLLGSGAVPFWRWLEGSCRTPQGLGKIQANFEKFLVDGRTGKALRRYPRKYQPYDIADDIAALIAGKTLPPAGANFKEEWRNAAKEAENDTYRFQKGLNYFDQ	100	0	gi|397575451|gb|EJK49704.1|	hypothetical protein THAOC_31388 [Thalassiosira oceanica]	-	-	-	-	58.9	9e-09	COG0386	Glutathione peroxidase, house-cleaning role in reducing lipid peroxides	VI	Defense mechanisms;Lipid transport and metabolism	K00432|1|4e-06|51.6|apro:F751_6884| glutathione peroxidase [EC:1.11.1.9]	GO:0006979//response to oxidative stress;GO:0055114//oxidation-reduction process	GO:0004602//glutathione peroxidase activity	-
68	EJK66158.1	hypothetical protein THAOC_12933 [Thalassiosira oceanica]	13356.7	0.139	2	3	2.37	0.116	4.953e-05	EJK66158.1	MQSGSGIQELMAAETRASQIVAEARIARGDRMKQAQVDADELIAAYRKEQEDAFLKSSSSNSGSNDVSAKVQAETNQEIQDMQGLFTKNAQKAVDVLLSKCCEVSLEVPTARVRATQKLYGK	100	4e-75	gi|397621184|gb|EJK66158.1|	hypothetical protein THAOC_12933 [Thalassiosira oceanica]	36.36	2e-12	sp|Q9WTT4|VATG2_MOUSE	V-type proton ATPase subunit G 2 OS=Mus musculus GN=Atp6v1g2 PE=1 SV=1	-	-	-	-	-	-	K02152|1|4e-10|56.2|cre:CHLREDRAFT_59366| V-type H+-transporting ATPase subunit G	GO:0015992//proton transport	GO:0016820//hydrolase activity, acting on acid anhydrides, catalyzing transmembrane movement of substances	GO:0016471//vacuolar proton-transporting V-type ATPase complex
69	XP_002287422.1	predicted protein, partial [Thalassiosira pseudonana CCMP1335]	58539.1	0.027	1	2	1.48	0.215	0.01339	XP_002287422.1	QKKQAVVEDAESDYITSRAENYSKWYNDIIRVCDLADNSPVRGCMVIKPWGMSIWDQIRNDLDARIKEHGAENAYFPLLIPKSFLSKEAEHVDGFAKECAVVTHHRLTVDPSGEGGLIADPEAELEDPLIIRPTSETMIWNMFKKWIVSHRDLPLKMNQWANVMRWEMRTRPFLRTSEFLWQEGHTAHATSEGALEDSKLMLDQYAEMCQNLLAIPVIKGAKSPSERFAGAEETFTIEALMQNGWALQSGTSHFLGQSFGKAFDVTFQDAEGKQQDVWGTSWGVSTRLIGALIMTHSDDAGLVLPPRVAPVQVVVVPIPPKKNDEEGKVALNNALDKMVANLKSAGLKVKVDDRDYVRNGAKYFEWERKGVPLRIELGPRDVKGGVCVFKYRVGKEEKE…	100	0	gi|223995497|ref|XP_002287422.1|	predicted protein [Thalassiosira pseudonana CCMP1335]	54.27	2e-173	sp|Q8A988|SYP_BACTN	Proline--tRNA ligase OS=Bacteroides thetaiotaomicron (strain ATCC 29148 / DSM 2079 / NCTC 10582 / E50 / VPI-5482) GN=proS PE=3 SV=1	565	0	COG0442	Prolyl-tRNA synthetase	J	Translation, ribosomal structure and biogenesis	K01881|1|0.0|607|gsl:Gasu_39770| prolyl-tRNA synthetase [EC:6.1.1.15]	GO:0006433//prolyl-tRNA aminoacylation	GO:0004827//proline-tRNA ligase activity;GO:0005524//ATP binding	GO:0005737//cytoplasm
70	EJK63951.1	hypothetical protein THAOC_15362 [Thalassiosira oceanica]	165319	0.005	1	2	1.33	0.01	5.864e-06	EJK63951.1	MSPAQILGRKEVQMVPDGHAALQGLSSIPYLTSVAAAGFYRNDVINGSGSSAGRARAMVSEFAVAPARLIDNSSGRRAIGIALRPQHFIGDVLGMNRCHGRRHRGTRGEAMEELDSSYRRCAGRADRGRQGAVVALQMRRATYAQGRKIQGGDISAATAATAATAATAATAATAATAATAATAATAAISYPRFNSSRTLSSLLGRREEKVGGREGRGRHSARGRGRGPIDEVHKHTHITAVRPARPSMVDAAATGNAGVSRGRTGQSGQVQPFRGRGGRGRGAGGGRGHTVEDQRRVGGRVCGRGYNLRDTVALGPRTHNRGRGGDKRVHFDLALQIRSLNSPAAQEAGSGRNNPGRGRGPGRGSRGNQTVPISSSVDSVATNNVNTDAIHALQTIGLD…	100	0	gi|397616373|gb|EJK63951.1|	hypothetical protein THAOC_15362 [Thalassiosira oceanica]	-	-	-	-	-	-	-	-	-	-	-	-	-	-
71	EJK70428.1	hypothetical protein THAOC_08217 [Thalassiosira oceanica]	16091.2	0.076	1	2	1.83	0.271	0.004027	EJK70428.1	MQRLPSGEVVITPRNFKLLEELDKAEKGHGCGLWLWFRDSHASSKISSALTPRTGPRSDDGRNGTNERTKRADRARPAVLRAPDLHPGELPEGPPAGQVRFEDQRLVRRPEQRRDRVLEGPRDEELDKESRHRAGSGVAEGGDG	100	2e-99	gi|397632130|gb|EJK70428.1|	hypothetical protein THAOC_08217 [Thalassiosira oceanica]	-	-	-	-	-	-	-	-	-	-	-	-	-	-
72	EED89895.1	predicted protein [Thalassiosira pseudonana CCMP1335]	60619.1	0.077	3	4	1.42	0.15	0.007141	EED89895.1	MTDTKRPHPSSSQAAQAIIESAMSAMTSTTKPPLYDVTIVCTTDDYQAAYWMDRLSNGVCKKPTTATGNNDEGVYPMVLAVSEDWSPSGAGNGLGTLYAFQKACRVAQEKFGVDIGSDLKGGKISAALFHTAGKGTRLAPLPASENNNKPGVKLPVCHQLADGSYEPITVLEAVVRQTGIYAASRSGRLSVYWGDQIFVPTAPFEYTPSHHVDIMCTLEEEPPTEKVWQERGLEKYGVIAVAKGESGDAAQVEKVDHPTAVRMLKNLGDIGRVGPSLGSFSVSAKILEALCEEFKEELASKDGKLDTDPHFWMPLTLPQDEYISLMSQKGVEEDESRSHHMRMSKMKESFMAANSELGLFGAVDVGNNACWWDYGQLKLYITNNLKLSEDGADADLLRR…	100	0	gi|224007479|ref|XP_002292699.1|	predicted protein [Thalassiosira pseudonana CCMP1335]	-	-	-	-	-	-	-	-	-	-	-	-	-	-
73	XP_002295647.1	predicted protein [Thalassiosira pseudonana CCMP1335]	68774.6	0.024	1	1	1.72	0.383	0.01835	XP_002295647.1	MASKSVLITSLVCLLIGGTSSFHLPSSQLRRPPTTIHSSTETTDTASSNDYQESYSAPLTEINRRRNLAIISHPDSGKTTMTEKLLLYGGALQQAGAVRMKGEQRGTQSDFMEMERQRGISISATVMSFDYNALHINILDTPGHQDFSEDTYRALAAADNAVMLLDAAKGLEPQTRKLFEVCRMRQLPLFTFVNKMDRPALTPYEIMDQIEAEFGLETHPILWPIGDGERFKGVLDRLENMVHLFDRAERGSKSEVRQVSMSDLDTLKECINDDELFDKLLEDQELLEELINPLDMERVIAGEQSPLFFGSAMTNFGVQLFLDKFCAMGTKPSGRLAKRMDEVKGKKAKEAASSIDDDEGDELIGPEYEDFTGFVFKTQANLDPKHRDRLAYIRIVSGS…	100	0	gi|224011745|ref|XP_002295647.1|	predicted protein [Thalassiosira pseudonana CCMP1335]	56.33	0	sp|B0JIY7|RF3_MICAN	Peptide chain release factor 3 OS=Microcystis aeruginosa (strain NIES-843) GN=prfC PE=3 SV=1	623	0	COG4108	Peptide chain release factor RF-3	J	Translation, ribosomal structure and biogenesis	K02355|1|3e-43|169|bpg:Bathy17g02170| elongation factor G	GO:0006184//GTP catabolic process;GO:0006415//translational termination	GO:0016149//translation release factor activity, codon specific;GO:0003924//GTPase activity;GO:0005525//GTP binding	GO:0005737//cytoplasm
74	XP_002296775.1	predicted protein [Thalassiosira pseudonana CCMP1335]	35623.1	0.077	2	6	1.62	0.243	0.00683	XP_002296775.1	MNRQRMQKLFLTVALAAFPSAVVGFAPSPTIGRKQSSQLRQSNDILINDDHVVSPTHSLTRATFLSTLLTSSTAILTTLPQPSLALVKGNAPPPKKKPPSDGATDETKKCRNVEECQEMAERQETLRMQQEAERAANGPKAQVVGGSRYLDIVEEGRDGATEGARVATKGDEVEVFYKVLKLGKRSYDGLSGEGTVVFSRGYALEDDEKNVGDHSFKFKIGDSNVIKALNDAVPGMAVGALRRISVTPQNGWEKNTKQCDGGPGGSGSGGDLKTDYVVVPTATMVEQEACFDRNKLPFPSTYAQERRMAQRFDQSLIMEVRLVNVL	100	0	gi|224014224|ref|XP_002296775.1|	predicted protein [Thalassiosira pseudonana CCMP1335]	-	-	-	-	-	-	-	-	-	-	-	GO:0006457//protein folding;GO:0000413//protein peptidyl-prolyl isomerization	GO:0003755//peptidyl-prolyl cis-trans isomerase activity	-
75	EJK53532.1	hypothetical protein THAOC_27014 [Thalassiosira oceanica]	77283.5	0.207	2	6	1.51	0.242	0.01588	EJK53532.1	MFFFLLAGRGAAGSDPWPQDSGARGMFQFRAISGLSCAGCAGAGGMRVVGRGAAGSSTQDKTTFAAAAGGTETYLTKTGGEMSDYEQESDYGFIFKVSGPLVVADNMSGAAMYELVRVGHYKLVGEIIKLEGDTASIQVYEDTSGLTVGDPVLRKKQPLSVELGPGIMGTIFDGIQRPLEHIFQDSGDVYVPKGVDIPCLTRDVRWTFTPSAVIKEGMPVTGGDVMGIVYENEIIHSHKIIVPPNVYGTVTKIHTTGTDGQETFLVDDVVMEVYNESQDKTHYLTLSHFWPVRRPRPITEKLPGNVPLITGLRVIDGLFPSVLGGTCAVPGAFGCGKTVISQSLSKFSNSDVIVYVGCGERGNEMAEVLCDFPELTMTIKDKESGAEKEVGIMKRTTLV…	100	0	gi|397586188|gb|EJK53532.1|	hypothetical protein THAOC_27014 [Thalassiosira oceanica]	62.02	0	sp|Q5TTG1|VATA_ANOGA	V-type proton ATPase catalytic subunit A OS=Anopheles gambiae GN=Vha68-2 PE=3 SV=1	602	0	COG1155	Archaeal/vacuolar-type H+-ATPase catalytic subunit A/Vma1	C	Energy production and conversion	K02145|1|0.0|793|jcu:105646144| V-type H+-transporting ATPase subunit A [EC:3.6.3.14]	GO:0042777//plasma membrane ATP synthesis coupled proton transport;GO:0015991//ATP hydrolysis coupled proton transport	GO:0046933//proton-transporting ATP synthase activity, rotational mechanism;GO:0005524//ATP binding;GO:0046961//proton-transporting ATPase activity, rotational mechanism	GO:0033180//proton-transporting V-type ATPase, V1 domain
76	AAV67002.1	nitrate reductase, partial [Thalassiosira weissflogii]	15372.1	0.061	1	1	1.24	0.135	0.02947	AAV67002.1	GGWWYKPEYIFNELNINSAMTAPDHNETIDLARNIAGTYEVGGYAYTGGGRRISRVEVTTDGGKHWEVSKIHQIERPTDYGMYWCWIWWSFDLKVADLVGCKEIWCRAWDESNNCQPTEPTWNLMGMGNNQ	99.24	4e-95	gi|55845945|gb|AAV66997.1|	nitrate reductase [Asterionellopsis glacialis]	53.08	5e-46	sp|P49102|NIA3_MAIZE	Nitrate reductase [NADH] 3 OS=Zea mays PE=3 SV=1	71.6	6e-14	COG2041	Periplasmic DMSO/TMAO reductase YedYZ, molybdopterin-dependent catalytic subunit	C	Energy production and conversion	K10534|1|6e-47|164|olu:OSTLU_37938| nitrate reductase (NAD(P)H) [EC:1.7.1.1 1.7.1.2 1.7.1.3]	GO:0042128//nitrate assimilation;GO:0055114//oxidation-reduction process	GO:0020037//heme binding;GO:0050660//flavin adenine dinucleotide binding;GO:0043546//molybdopterin cofactor binding;GO:0009703//nitrate reductase (NADH) activity;GO:0030151//molybdenum ion binding;GO:0005506//iron ion binding;GO:0009055//electron carrier activity	-
77	EJK55914.1	hypothetical protein THAOC_24294 [Thalassiosira oceanica]	8569.36	0.154	1	1	1.26	0.089	0.007278	EJK55914.1	MAPIDIKDDDEARGASLLADLADVKKILFFYAEWHEPSAEGGPFDLVVKTLANQGPGEVRFYRVLAEETPSLSNKVTQ	100	8e-52	gi|397593239|gb|EJK55914.1|	hypothetical protein THAOC_24294 [Thalassiosira oceanica]	-	-	-	-	-	-	-	-	-	-	-	-	-	-
78	EJK74888.1	hypothetical protein THAOC_03405 [Thalassiosira oceanica]	36180.6	0.102	2	3	1.1	0.237	0.0538	EJK74888.1	MFVKNLAARSINAAARRAYSASAPSSAKVAVLGAAGGIGQPLSLLCKLSPEVSELSCYDIVGTPGVAADLSHIPTKSSTTGSLPSPVSWPLRGNGGLEETLSGADVVVIPAGVPRKPGMTRDDLFNTNASIVKTLVEGCAEFCPEAVIAIISNPVNSTVPIAAEVLKKAGKYNPKKLVGVTTLDVCRANTFVANSQGLDPKDVDVTVIGGHAGITILPLFSRVGAKFSDEELEAITVRTQFGGDEVVAAKAGAGSATLSMAYAGYIFTENVLKAMRGEGVVQCAFVESDLTDAEFFASPVRFGPNGVEEILPLGDLSPYEQQWFDKMMPELKKQIAKGKDFVSA	100	0	gi|397641860|gb|EJK74888.1|	hypothetical protein THAOC_03405 [Thalassiosira oceanica]	58.86	5e-122	sp|Q42972|MDHG_ORYSJ	Malate dehydrogenase, glyoxysomal OS=Oryza sativa subsp. japonica GN=Os12g0632700 PE=1 SV=3	329	7e-111	COG0039	Malate/lactate dehydrogenase	C	Energy production and conversion	K00026|1|3e-126|369|ppp:PHYPADRAFT_162162| malate dehydrogenase [EC:1.1.1.37]	GO:0044262//cellular carbohydrate metabolic process;GO:0006108//malate metabolic process;GO:0006099//tricarboxylic acid cycle	GO:0030060//L-malate dehydrogenase activity;GO:0000166//nucleotide binding	-
79	EJK62480.1	hypothetical protein THAOC_16908 [Thalassiosira oceanica]	30275.3	0.046	1	7	1.27	0.137	0.02122	EJK62480.1	MRCCRLSLLAAAISVASGFVSPSSRGQSSPLSMAKTGDEVATSSRRRFIDSVSSGAAVAASSVLFTPSPAFAYGLGKANDKLKSYGLPGLVNVPGSYSALAEIYGKGANRSPLLVAFGFPIDWVVTLPSQDVNGEDGTIQAGEYAKGDTATFFVLPNEGKVDIQSKDKKFFAEALIAAISQKSSNIYQDFKVTKMEPSADGKYMYVNFKYTLLTGAGFEVERKGVASVTSVGNGVQLLWSASIAARYRAKTEDQLNTIVRSFVCYSDGLNFSADLRPGMENDF	100	2e-174	gi|397613888|gb|EJK62480.1|	hypothetical protein THAOC_16908 [Thalassiosira oceanica]	-	-	-	-	-	-	-	-	-	-	-			GO:0009523//photosystem II
80	EJK72068.1	hypothetical protein THAOC_06442 [Thalassiosira oceanica]	59407.2	0.106	1	8	1.3	0.066	0.002032	EJK72068.1	MQRLSRQQNQSLGPSTLMTEQSMYGAEFTVGIAHGEKAGQQLKVTGLAGSILSLGLPVLFPTTTLHLLFGLQLNEVIRFCFGAERSPDYKPSVPRPLSLKGKVMEPIYWTAQDVHPESTTQVARPASSALFAERRVVVTGMGITSCLGNTLEDVTKSLHEAESGIEFDPEWAELGIKSNVRGKPTLSDAEFKEKIPKAHLRFMGKNAQYAYVAMQDAVADSGMDPEVYQENPRVCAILGQGGTSIPDIVETVDAVKNAKRWKNKVGPFRVTRSMGSTVSAVLATAFKVQGMSFSISSACSTGAHCIGTGFEQILLNKADVAFCGAGENVDWDFTSMFDCMGALSTSYNDTPKKASRAFDKARDGFCIAGGGGVVVLEELEHAKARGAKIYAELVGYGAN…	100	0	gi|397635920|gb|EJK72068.1|	hypothetical protein THAOC_06442 [Thalassiosira oceanica]	54.81	6e-146	sp|Q02K94|FABB_PSEAB	3-oxoacyl-[acyl-carrier-protein] synthase 1 OS=Pseudomonas aeruginosa (strain UCBPP-PA14) GN=fabB PE=1 SV=1	494	2e-171	COG0304	3-oxoacyl-(acyl-carrier-protein) synthase	IQ	Lipid transport and metabolism;Secondary metabolites biosynthesis, transport and catabolism	K09458|1|1e-57|202|bvg:104902742| 3-oxoacyl-[acyl-carrier-protein] synthase II [EC:2.3.1.179]	GO:0044238//primary metabolic process	GO:0016740//transferase activity	-
81	XP_002295000.1	member of the clp superfamily, regulatory beta subunit [Thalassiosira pseudonana CCMP1335]	101444	0.068	1	1	1.46	0.199	0.01206	XP_002295000.1	MAESDFDQTKYTEAAWAALSALPACAEAYSATSVEAPMLLSILLDPQVATKLLEDAGVDVAKLRGEVEVWLNKQPRVTITGDSTMISSQKQLGRVLGEVLKGGREIQKELKDSFISTEALLLSLCSRDTLFTIKALKSQGVSTSDVQSAVQSFRKSTGSSNQSGQASRVTSRSAEGLYDSLEKYGIDFTKSAEDGKLDPVIGRDDEIRRAIQILSRRTKNNPVLIGDPGVGKTAIAEGIAQRMITGDVPDTLKPPCRLIGLDMGALVAGATMRGEFEERLKAVIDEVQKSDGEIVLFIDEMHTVVGAGATSGSMDASNLLKPALARGQLRCIGATTINEYRKYIEKDKALERRFQQVYVGEPSPEDTVSILRGLKPRYELHHGVRIRDEALLAAAKLSS…	100	0	gi|224012695|ref|XP_002295000.1|	member of the clp superfamily, regulatory beta subunit [Thalassiosira pseudonana CCMP1335]	59.22	0	sp|Q8DJ40|CLPB1_THEEB	Chaperone protein ClpB 1 OS=Thermosynechococcus elongatus (strain BP-1) GN=clpB1 PE=3 SV=1	1023	0	COG0542	ATP-dependent Clp protease ATP-binding subunit ClpA	O	Posttranslational modification, protein turnover, chaperones	K03695|1|0.0|928|zma:103636567| ATP-dependent Clp protease ATP-binding subunit ClpB	GO:0019538//protein metabolic process;GO:0009658//chloroplast organization;GO:0009408//response to heat	GO:0016887//ATPase activity;GO:0005524//ATP binding	GO:0009570//chloroplast stroma
82	EJK71347.1	hypothetical protein THAOC_07228 [Thalassiosira oceanica]	33228.4	0.059	2	6	1.64	0.452	0.04486	EJK71347.1	MATLIGESKVEVILAEARCENRADVAKELDSVKPSHVFMAAGITGRPNIDWCEDHKPDTIRTNVIGTLNLADLCNERGIHCTIYATGCIFKYDDAHPLGSGIGFTEEDAPNFDESFYSQTKGYMEPMLKCYPTAMILRVRMPISDDLSHRNFITKIVKYERVVNIPNSMTVLHEMLPASLAMAKKGLTGVYNFCNPGVISHNECLDLYTKYIDPTYTYKNFTIEEQSKVLKAGRSNNELDATKLMRDMPEEIKINDIKTAVELCMQRMQRNLTEEFGPLPDALPKEVRKN	100	0	gi|397634240|gb|EJK71347.1|	hypothetical protein THAOC_07228 [Thalassiosira oceanica]	62.96	3e-114	sp|Q9LQ04|RMLCD_ARATH	Bifunctional dTDP-4-dehydrorhamnose 3,5-epimerase/dTDP-4-dehydrorhamnose reductase OS=Arabidopsis thaliana GN=NRS/ER PE=1 SV=1	116	4e-29	COG1091	dTDP-4-dehydrorhamnose reductase	M	Cell wall/membrane/envelope biogenesis	K12451|1|2e-116|340|sind:105157346| 3,5-epimerase/4-reductase [EC:5.1.3.- 1.1.1.-]	GO:0045226//extracellular polysaccharide biosynthetic process;GO:0010253//UDP-rhamnose biosynthetic process;GO:0019305//dTDP-rhamnose biosynthetic process	GO:0008830//dTDP-4-dehydrorhamnose 3,5-epimerase activity;GO:0008831//dTDP-4-dehydrorhamnose reductase activity;GO:0010490//UDP-4-keto-rhamnose-4-keto-reductase activity;GO:0010489//UDP-4-keto-6-deoxy-glucose-3,5-epimerase activity;GO:0000166//nucleotide binding;GO:0050662//coenzyme binding	GO:0005829//cytosol;GO:0009506//plasmodesma;GO:0005886//plasma membrane;GO:0048046//apoplast
83	XP_002295048.1	predicted protein [Thalassiosira pseudonana CCMP1335]	43714.6	0.207	2	8	1.54	0.031	2.774e-05	XP_002295048.1	MKVVFAALLAAVASNNASAFSTSSCTVTRTSSLSMSASEEDRRSFVTKSATTAAAATLATLGSASAPLPASAAASRQWRQVKVPFEDTVYDIDFDSPTHGYIVGARGSFAETNDGGATWEPRSFSNLDAEEEITYRFQVVSFNNGEGWVLGKPTLLLHTKDGGKTWERIPLSPKLPGEPTGILATGPNSAEMITSSGAVYTTENAGRNWKAQVKETIDATLNRISSSGVSGASYFTGSIVNEQRDSKGAYIAVSSRGNFFLTWEPGQDFWIPHNRGTPRRIQNMGFVRGDIKNGLWMTLNGGKLLVSSSDSVDLSSEEFPFDEANIKTGGYGLTDVAWRDDNEVWAVGGSNTMYVSKDNGRNFVFDKSANDIPGNLYNVKFFREFGNAGWALGSNGLLL…	100	0	gi|224012791|ref|XP_002295048.1|	predicted protein [Thalassiosira pseudonana CCMP1335]	55.66	2e-127	sp|Q9AW48|P2SAF_GUITH	Photosystem II stability/assembly factor HCF136, chloroplastic OS=Guillardia theta GN=hcf136 PE=3 SV=1	271	5e-87	COG4447	Uncharacterized protein related to plant photosystem II stability/assembly factor	R	General function prediction only	-			GO:0044435//plastid part;GO:0034357//photosynthetic membrane;GO:0009507//chloroplast
84	YP_009093163.1	ribosomal protein L12 (chloroplast) [Roundia cardiophora]	13460.1	0.133	1	13	1.29	0.096	0.006275	YP_009093163.1	MSEKINQIVEELKTLTLLEASELVTAIEETFGVDASASVGGSIVMGAAPAAAEEVEEKTEFNVMLDEVPADKKIAVLKVVRTLTGLGLKEAKELVESAPKMVQEALSKDAAEDAKKQIEDAGGKVSLT	100	1e-70	gi|700658158|ref|YP_009093163.1|	ribosomal protein L12 (chloroplast) [Roundia cardiophora]	92.19	4e-62	sp|A0T0Q7|RK12_THAPS	50S ribosomal protein L12, chloroplastic OS=Thalassiosira pseudonana GN=rpl12 PE=3 SV=1	164	1e-51	COG0222	Ribosomal protein L7/L12	J	Translation, ribosomal structure and biogenesis	K02863|1|9e-27|106|gsl:Gasu_40200| large subunit ribosomal protein L1!K02935|2|5e-26|99.8|sly:101253247| large subunit ribosomal protein L7/L12	GO:0006412//translation	GO:0003735//structural constituent of ribosome	GO:0005840//ribosome;GO:0009507//chloroplast
85	EED94695.1	predicted protein [Thalassiosira pseudonana CCMP1335]	20083.2	0.063	1	1	1.34	0.13	0.00956	EED94695.1	MKTVLRISALAAALVMSTTNAFTVPLTSNTISQSSTQLYAKGFGPPPPEPKKKSAGQVDREQKASKYDEIAATGGQEYRIFVRQFGSDDKSWLPTGSIAVPRGSQVSDAIFSNEEGLRTAIVRAYPALKGNEIEFEYGYNLKVYPDDPVQVAMKGQGGVSSGPSVGNWISNLLSPVDTSGVAPPAVNEN	100	2e-117	gi|223995137|ref|XP_002287252.1|	predicted protein [Thalassiosira pseudonana CCMP1335]	-	-	-	-	-	-	-	-	-	-	-	-	-	-
86	XP_002295318.1	predicted protein, partial [Thalassiosira pseudonana CCMP1335]	18134.2	0.055	1	2	1.29	0.048	0.0008297	XP_002295318.1	LDIRVGRINKVWVHEEADKLYCEEIDVGEEEPRLIASGLRPYMSAEDMEGRLVLVLCNLKERKLAGFPSHGMVLCASSEDHSQVKLVSVPVEAKIGERVTVPGFDFEGEEGQPYAENKVGKKKVFEQIAPFLKSSEYGVPEFGGRPLMTSAGVCTSPIANGVVA	100	2e-117	gi|224013333|ref|XP_002295318.1|	predicted protein [Thalassiosira pseudonana CCMP1335]	48.15	2e-34	sp|Q9ZTS1|SYM_ORYSJ	Probable methionine--tRNA ligase OS=Oryza sativa subsp. japonica GN=Os06g0508700 PE=2 SV=2	82	3e-19	COG0073	tRNA-binding EMAP/Myf domain	J	Translation, ribosomal structure and biogenesis	K15437|1|1e-41|146|ppp:PHYPADRAFT_183550| aminoacyl tRNA synthase complex-interacting multifunctional protein 1!K01866|5|1e-39|134|cre:CHLREDRAFT_101947| tyrosyl-tRNA synthetase [EC:6.1.1.1]		GO:0000049//tRNA binding	-
87	EJK48668.1	hypothetical protein THAOC_32518, partial [Thalassiosira oceanica]	26231.3	0.084	2	7	1.58	0.252	0.01088	EJK48668.1	KVCLVTGASRGIGAAIALELGKSGQKVIVNYAGSEAKALEVVEAVKAAGGDAIAIQADCGNQASIQDMFKKIMEEYGTVDVLVNNAGITKDGLVMRMKPDQWQDVIDVNLTGVFYASQEFFKLCAKKKMKEGAGRIINMSSVVGQVGNPGQANYAAAKGGVIGLTMSNAREFTSRGVIVNAICPGYIQSDMTDELPDAVKDAVISQIPLARMGKPEEIAGMTRFLALDPAAAYITGHTFNVDGGMAIGA	100	2e-161	gi|397573364|gb|EJK48668.1|	hypothetical protein THAOC_32518, partial [Thalassiosira oceanica]	54.25	7e-81	sp|P51831|FABG_BACSU	3-oxoacyl-[acyl-carrier-protein] reductase FabG OS=Bacillus subtilis (strain 168) GN=fabG PE=3 SV=3	288	4e-97	COG1028	NAD(P)-dependent dehydrogenase, short-chain alcohol dehydrogenase family	IQR	Lipid transport and metabolism;Secondary metabolites biosynthesis, transport and catabolism;General function prediction only	K00059|1|3e-88|267|cre:CHLREDRAFT_114298| 3-oxoacyl-[acyl-carrier protein] reductase [EC:1.1.1.100]	GO:0008152//metabolic process	GO:0016491//oxidoreductase activity;GO:0000166//nucleotide binding	GO:0009507//chloroplast
88	EJK47786.1	hypothetical protein THAOC_33477 [Thalassiosira oceanica]	59516.9	0.028	1	1	2.04	0.465	0.009469	EJK47786.1	MKILFSALRVATVTAFTSSSSRSSVHARQQVSSKMTATLSEPSTAIKFADESSNFKELKRTSSARGKQLAVLATIAHEKSVDPRIGELLAASTKDLEACDKEIEDLDDAKRILELEKADYQKRICIPKELAAKKAELEASAYSAWVKARQDNDFAAFAPALGDCFDLAKEIAALKRGDNDISLYSQMLDEFEMGMQGTRIDELFAEVQSALVPFIARIRASEDKPSLDPLRGKFDVDAQKKVCLDIVKSLGYDASHGRLDVSVHPFTMSLSGSDVRITSRFSEEEWYQGLAGAIHEGGHAMYEQNLQGSDLSIDSALSMGVHESQSLFWERHIGKCPAFFQWATPMLNDQLKLDASADDLYSAVNAIDFSNFIRVEADELTYPLHVILRYTIERQVVSG…	100	0	gi|397571414|gb|EJK47786.1|	hypothetical protein THAOC_33477 [Thalassiosira oceanica]	39.2	2e-104	sp|P50848|CBP1_BACSU	Carboxypeptidase 1 OS=Bacillus subtilis (strain 168) GN=ypwA PE=1 SV=1	338	3e-109	COG2317	Zn-dependent carboxypeptidase, M32 family	E	Amino acid transport and metabolism	-		GO:0004180//carboxypeptidase activity	-
89	EJK45149.1	hypothetical protein THAOC_36256 [Thalassiosira oceanica]	57765.6	0.124	4	6	1.46	0.045	0.0001458	EJK45149.1	MSAKKHKTANGHTDGDALWELDEETLNSGAVGFTASQLFIKNPACVAYTYDDVIMMPGHINFGLNEVDISTKLTKGISIKLPFVSSPMDTVTENKMAISMALQGGIGIIHSNFSIEDQAAEVRKVKRYENGFITDPICLCPNSTVSDVMELKAKHGYSGIPITDCGTMNGKLVGIVSSRDVSFVTDRGIKLSEIMTPREKLSVAKQGVSLHEANEILKETKKGKLPVVNDNDELVALIARTDLLKNHEYPNASKNPVSKQLLVGAAIGTRPEDRDRAAALVEAGVDVIVVDSSQGDSLYQIEIVKHLKETHEKLQVIAGNVVTPSQAIHLIQAGADGLRVGMGIGSICTTQEVCAVGRAQASAVFHVAKFARKYGVPILADGGIKSTGHITKALSLGAS…	100	0	gi|397566672|gb|EJK45149.1|	hypothetical protein THAOC_36256 [Thalassiosira oceanica]	60.2	0	sp|P20839|IMDH1_HUMAN	Inosine-5'-monophosphate dehydrogenase 1 OS=Homo sapiens GN=IMPDH1 PE=1 SV=2	568	0	COG0517	CBS domain	T	Signal transduction mechanisms	K00088|1|0.0|625|ccp:CHC_T00009518001| IMP dehydrogenase [EC:1.1.1.205]	GO:0006177//GMP biosynthetic process;GO:0055114//oxidation-reduction process	GO:0003938//IMP dehydrogenase activity;GO:0046872//metal ion binding	-
90	ADB27602.1	translation elongation factor EF-Tu (chloroplast) [Thalassiosira oceanica CCMP1005]	44685.5	0.347	1	19	1.22	0.14	0.04641	ADB27602.1	MAREKFERTKPHVNIGTIGHVDHGKTTLTAAITATLSLEGDSVAKDYADIDGAPEERARGITINTAHVEYETKDRHYAHVDCPGHADYVKNMITGAAQMDGAILVVSAADGPMPQTREHILLAKQVGVPHIVVFLNKQDQVDDDELLELVELEVRELLSAYDFPGDDIPICPGSALQAIEAISANPSIQRGDNPWVDKIYALMDSVDAYIPTPERDVEKTFLMAIEDVFSITGRGTVATGRIERGVVKVGDNVEIVGVAETQTTTITGIEMFQKTLDEGFAGDNVGILLRGVTREDIERGMVLSQPGTITPHTNFESEVYVLTKEEGGRHTPFFTGYRPQFYVRTTDVTGSIEQFTADDGSVVEMVMPGDRIKMTAELIYPVAIEEGMRFAIREGGRTI…	100	0	gi|315320592|ref|YP_004072649.1|	translation elongation factor EF-Tu [Thalassiosira oceanica CCMP1005]	94.62	0	sp|A0T100|EFTU_THAPS	Elongation factor Tu, chloroplastic OS=Thalassiosira pseudonana GN=tufA PE=3 SV=1	682	0	COG0050	Translation elongation factor EF-Tu, a GTPase	J	Translation, ribosomal structure and biogenesis	K02358|1|0.0|623|cvr:ChvaP_p046| elongation factor Tu	GO:0006414//translational elongation;GO:0006184//GTP catabolic process	GO:0003746//translation elongation factor activity;GO:0003924//GTPase activity;GO:0005525//GTP binding	GO:0009507//chloroplast
91	AEA41993.1	ribulose-1,5-biphosphate carboxylase/oxygenase small subunit, partial (chloroplast) [Skeletonema costatum]	14443.9	0.468	1	2	1.81	0.417	0.0153	AEA41993.1	FSFLPDLTDAQIEKQVAYAMAKGWAMNVEWTDDPHPRNNYWELWGLPLFDIKDPATVMFELNEARKSCAAGYIRINAFDASYGVESCVMSFITNRPTNEPGFYLDRTDGPGRQIVYSIKSYSVQAN	100	3e-92	gi|327258976|gb|AEA41993.1|	ribulose-1,5-biphosphate carboxylase/oxygenase small subunit [Skeletonema costatum]	93.65	2e-88	sp|O98948|RBS_THANO	Ribulose bisphosphate carboxylase small chain OS=Thalassiosira nordenskioeldii GN=rbcS PE=3 SV=1	173	2e-55	COG4451	Ribulose bisphosphate carboxylase small subunit	G	Carbohydrate transport and metabolism	K01602|1|3e-54|169|ccp:CHC_955| ribulose-bisphosphate carboxylase small chain [EC:4.1.1.39]	GO:0019253//reductive pentose-phosphate cycle;GO:0009853//photorespiration;GO:0055114//oxidation-reduction process	GO:0016984//ribulose-bisphosphate carboxylase activity;GO:0004497//monooxygenase activity	GO:0009507//chloroplast
92	EJK48197.1	hypothetical protein THAOC_33026, partial [Thalassiosira oceanica]	13928.1	0.213	1	2	1.57	0.073	0.0003108	EJK48197.1	EAGKLVAVIGDEVRRATTHAGYSHGIPPRWNWTQNSRIDQLLTVKQDTKADVIESTLREFTQRDDIGIILINQHLANNMRHFLTDYKQTIPTILEIPSKEHPYDPEQDFIMQRVNMFLGGGA	100	6e-88	gi|397572299|gb|EJK48197.1|	hypothetical protein THAOC_33026, partial [Thalassiosira oceanica]	49.14	2e-27	sp|Q16864|VATF_HUMAN	V-type proton ATPase subunit F OS=Homo sapiens GN=ATP6V1F PE=1 SV=2	-	-	-	-	-	-	K02151|1|1e-25|96.3|csl:COCSUDRAFT_9239| V-type H+-transporting ATPase subunit F	GO:0015992//proton transport	GO:0016787//hydrolase activity;GO:0015078//hydrogen ion transmembrane transporter activity	GO:0033178//proton-transporting two-sector ATPase complex, catalytic domain
93	EED90355.1	hypothetical protein THAPSDRAFT_23902 [Thalassiosira pseudonana CCMP1335]	90447.3	0.116	2	5	1.23	0.13	0.03519	EED90355.1	MKITKSTVAALLMLTASSAFTPSNHHKIAHRNLQIQPLPSSSHPHHHRLATASNRLSPLHSTAPNVDKSKTPDISETDDPLTKYGVDFTARAAEGKLDPVIGRDDEIRRAIQILSRRTKNNPVLIGDPGVGKTAIAEGIAQRMYSGDVPDTLKDCKLIGLDMGALIAGASYRGEFEERLKKVVDRVKESEGEIILFIDEMHTVVGAGATSGSMDASNLLKPALARGQLRCIGATTIDEYRKYIEKDKALERRFQQVYIGEPTPEDTVSILRGLKPKYEVHHGVRIRDEALLAAAKLSSRYLPDRFLPDKAIDLVDEACAKLKNELTSKPTALDEVDRRIIQLEMEKLSLSSDQSKQMDAKSTEAMSARLHHLDSEIEELKRTQQNLTDRWMAEKGAVDS…	100	0	gi|224006840|ref|XP_002292380.1|	hypothetical protein THAPSDRAFT_23902 [Thalassiosira pseudonana CCMP1335]	65.24	0	sp|Q8YM56|CLPB2_NOSS1	Chaperone protein ClpB 2 OS=Nostoc sp. (strain PCC 7120 / SAG 25.82 / UTEX 2576) GN=clpB2 PE=3 SV=2	955	0	COG0542	ATP-dependent Clp protease ATP-binding subunit ClpA	O	Posttranslational modification, protein turnover, chaperones	K03695|1|0.0|902|vcn:VOLCADRAFT_79064| ATP-dependent Clp protease ATP-binding subunit ClpB	GO:0019538//protein metabolic process;GO:0009658//chloroplast organization;GO:0009408//response to heat	GO:0016887//ATPase activity;GO:0005524//ATP binding	GO:0009570//chloroplast stroma
94	EJK44077.1	hypothetical protein THAOC_37410, partial [Thalassiosira oceanica]	36275.5	0.04	1	2	1.26	0.109	0.01292	EJK44077.1	EGDSVLYATAARDKDTRDLDFLPLSVDHQERFSSAGLTSGAFNKRDGRPAEHEILVCRLIDRPLRPLIADGWRHETQLLSWVLSYDGERTCDPLAITASAAALWLSDVPLKKPVAAAMVGYVDGRLVMNPTLEQMEHSRLHLIVAGTEDAVLMIEGAADFLPEALMVEAVSFGHEAIKLQCAALEELAKVAGKEKKYDTIKTPPEGIQTAVDEAYAADVDKLYSGSMTKKELSTAQSELSKRVTEEMEELFPEETAAVKSAYKDLMCRRIFQLGKTEGVRIDGRRLDEVRPIDSEAGLLPRVHGSALFTRGETQTVATATLGDSGMKQK	100	0	gi|397564132|gb|EJK44077.1|	hypothetical protein THAOC_37410, partial [Thalassiosira oceanica]	45.05	1e-84	sp|Q6MDI2|PNP_PARUW	Polyribonucleotide nucleotidyltransferase OS=Protochlamydia amoebophila (strain UWE25) GN=pnp PE=3 SV=2	283	3e-88	COG1185	Polyribonucleotide nucleotidyltransferase (polynucleotide phosphorylase)	J	Translation, ribosomal structure and biogenesis	K00962|1|3e-81|268|nnu:104604160| polyribonucleotide nucleotidyltransferase [EC:2.7.7.8]	GO:0006402//mRNA catabolic process;GO:0006396//RNA processing	GO:0004654//polyribonucleotide nucleotidyltransferase activity;GO:0003723//RNA binding;GO:0000175//3'-5'-exoribonuclease activity	GO:0005737//cytoplasm
95	XP_002292199.1	predicted protein [Thalassiosira pseudonana CCMP1335]	22308.6	0.151	2	2	1.79	0.582	0.04777	XP_002292199.1	MTLFKALLATFLAVGNTQAFAPSSLNHGLTKASSSTPATVMLATRRAALSTFFTGMVAATTTVATANAADSRTIGQISGSGLVFKDTLVVESFDDPKVKGVTLYVSNFERPLTERLSKDFFTEPSYASVTAVKTGPVEVADNIDKSEKGEPVFEEKRSLLFKELRVQRIYDVEKNTVVYVSFNTRLDKSNDTNKMAPMLRGQYKA	100	2e-120	gi|224006478|ref|XP_002292199.1|	predicted protein [Thalassiosira pseudonana CCMP1335]	34.82	2e-14	sp|P0AE94|CREA_SHIFL	Protein CreA OS=Shigella flexneri GN=creA PE=3 SV=1	103	1e-26	COG3045	Periplasmic catabolite regulation protein CreA (function unknown)	T	Signal transduction mechanisms	-	-	-	-
96	ABF60377.1	ribulose-1,5-bisphosphate carboxylase/oxygenase large subunit, partial (chloroplast) [Skeletonema pseudocostatum]	54591.3	0.398	1	33	1.39	0.201	0.0205	ABF60377.1	MSQSVSERTRIKSDRYESGVIPYAKMGYWDAAYSVKDTDVLALFRITPQPGVDPVEAAAAVAGESSTATWTVVWTDLLTACERYRAKAYRVDPVPNASDQFFAFIAYECDLFEEASLANLTASIIGNVFGFKAVAALRLEDMRIPHSYLKTFQGPATGIIVERERMNKYGTPLLGATVKPKLGLSGKNYGRVVYEGLKGGLDFLKDDENINSQPFMRWRERFLNCMEGINRASAATGEVKGSYLNITASTMEEVYKRAEYAKAVGSIVVMIDLVMGYTAIQSIAYWARENDMLLHLHRAGNSTYARQKNHGINFRVICKWMRMSGVDHIHAGTVVGKLEGDPLMIKGFYDILRLTELEVNLPFGIFFEMDWASLRRCMPVASGGIHCGQMHQLIHYLGD…	100	0	gi|98990619|gb|ABF60377.1|	ribulose-1,5-bisphosphate carboxylase/oxygenase large subunit, partial (chloroplast) [Skeletonema pseudocostatum]	96.12	0	sp|O98945|RBL_DETCO	Ribulose bisphosphate carboxylase large chain OS=Detonula confervacea GN=rbcL PE=3 SV=1	781	0	COG1850	Ribulose 1,5-bisphosphate carboxylase, large subunit, or a RuBisCO-like protein	G	Carbohydrate transport and metabolism	K01601|1|0.0|842|cme:CymeCp013| ribulose-bisphosphate carboxylase large chain [EC:4.1.1.39]	GO:0019253//reductive pentose-phosphate cycle;GO:0009853//photorespiration;GO:0055114//oxidation-reduction process	GO:0016984//ribulose-bisphosphate carboxylase activity;GO:0004497//monooxygenase activity;GO:0000287//magnesium ion binding	GO:0009507//chloroplast
97	EED94096.1	predicted protein [Thalassiosira pseudonana CCMP1335]	23083.7	0.042	1	1	2.28	0.485	0.00462	EED94096.1	MKFTTGLIASFACGATAFAPSSTITKQSTALNLAVGDTAPDFSLVDQNGKTFTRSKNKKPLVVYFYPADSTPGCTVQAKEFQKEIQAIRKEFKADVVELITLTDFLHFFVFYCSCVGISGQGAESKQKFAQELGLDFSILADEGDAVRSAFKVPKAAFGFLPGRVTYVLDKNGVCTSVYDNIADAASHIGAAKEALAAMKPAKKGGFEFSLPF	100	2e-142	gi|223997974|ref|XP_002288660.1|	predicted protein [Thalassiosira pseudonana CCMP1335]	41.11	3e-36	sp|Q9MB35|PERQ_SEDLI	Peroxiredoxin Q, chloroplastic (Fragment) OS=Sedum lineare GN=PRXQ PE=1 SV=1	122	1e-33	COG1225	Peroxiredoxin	O	Posttranslational modification, protein turnover, chaperones	K03564|1|4e-36|129|sind:105173718| peroxiredoxin Q/BCP [EC:1.11.1.15]	GO:0055114//oxidation-reduction process	GO:0016209//antioxidant activity;GO:0016491//oxidoreductase activity	GO:0044434//chloroplast part
98	XP_002295180.1	predicted protein [Thalassiosira pseudonana CCMP1335]	77673.4	0.012	1	1	1.66	0.373	0.02229	XP_002295180.1	MNHSTVTSTLLSILLLQQAVLEVDGFFFPIQQRCNTIKQSSFASTTTLQSPTATAVSTKLDVANSDMSSTNEVQTDAITNANAQTTLQSATTATDYTTKPPTPSDYCTMTTLPRHPTNEAANEILIQTEVALRNMQEKELFMACGDERGDIWSSESGRPNTTTTITTTGSSNNNIGRGVDSDNVVLPLDEEEMEIPMEVEQESVYANSYVDLGKVDTVGFDYDYTLVTYTQQLLELIYDMALKRLVEEKEYPREMLESGLRFDPFFSIRGLAVDRENGWICHLSYTHKVAVAWEGRHRVPRPRLMAEYSGKRALTPKERKTRLKPLNDLFSMAECCLMADTVQFFLDRDIPFCPRSAVNDVLGSITGTHVSGEFHRQVAREPEKFFEAKPYLKSVLDGM…	100	0	gi|224013056|ref|XP_002295180.1|	predicted protein [Thalassiosira pseudonana CCMP1335]	29.57	4e-69	sp|Q6GN91|NT5D3_XENLA	5'-nucleotidase domain-containing protein 3 OS=Xenopus laevis GN=nt5dc3 PE=2 SV=1	150	9e-37	COG1196	Chromosome segregation ATPase	D	Cell cycle control, cell division, chromosome partitioning	K01081|1|2e-41|162|gsl:Gasu_60230| 5'-nucleotidase [EC:3.1.3.5]	-	-	-
99	EED93672.1	enoyl-reductase [NADH] [Thalassiosira pseudonana CCMP1335]	32831.6	0.25	1	1	1.31	0.187	0.03668	EED93672.1	MAGPANVDLTGKVAFVAGVADSSGYGWAIARALASAGATIIVGTWPPVLKIFEMGIRKGSFDDDSILPDGSKMEIAKVYPLDAVFDTAEDVPEEIKTNKRYAGLDGYTIEEVAKAVEADYGKIDILVHSLANGPEVTKPLLETSRKGYLAASSASAYSAVSLLQKFGPIMNEGGNMLSLTYIASEKVIPGYGGGMSSAKAQLESDTRTLAFEAGRKWNVRVNTVSAGPLKSRAASAIGKEPGQKTFIEYAIDYSKANAPLAQDLYNDDVGNSALFLCSGLARTVTGVTLYVDNGLHAMGMALDSESMADSKN	100	0	gi|223997126|ref|XP_002288236.1|	enoyl-reductase [NADH] [Thalassiosira pseudonana CCMP1335]	66.67	5e-133	sp|P80030|FABI_BRANA	Enoyl-[acyl-carrier-protein] reductase [NADH], chloroplastic OS=Brassica napus PE=1 SV=2	404	5e-141	COG0623	Enoyl-[acyl-carrier-protein] reductase (NADH)	I	Lipid transport and metabolism	K00208|1|7e-138|399|smo:SELMODRAFT_148643| enoyl-[acyl-carrier protein] reductase I [EC:1.3.1.9 1.3.1.10]	GO:0006633//fatty acid biosynthetic process;GO:0055114//oxidation-reduction process	GO:0004318//enoyl-[acyl-carrier-protein] reductase (NADH) activity;GO:0000166//nucleotide binding	GO:0044434//chloroplast part
100	XP_002296387.1	dead box family RNA helicase [Thalassiosira pseudonana CCMP1335]	49664	0.201	8	22	1.27	0.093	0.007647	XP_002296387.1	MADANEEDHDLVDYDEEEEEENVVAEKTADGDSKEVKKGHYVGIHASGFKDFILKPECLRAVVDCGFEHPSEVQHECIPQAVLGMDIVCQAKSGMGKTAVFVLATLHQLNPNAFPAGENQVSVLVLCHTRELAFQIAHEYERFSKYLPEVKTAVFYGGVSIKTNRDVLKNDCPHIVVGTPGRVLGLAREKTLKLDHIKHFVLDECDRILESLDMRRDIQEIFRMTPHEKQVMMFSATLSKEIRPVCKKFCQDPMEIYVDDDTKLTLHGLQLYYVKLAEAEKNRKLNDLLDALEFNQVVIFVSKVARANELNRLLTECNFPSICIHAGQKQDERIAKYKSFKEFNARILVSTDLFGRGIDIERVNVVINYDFPDDSDQFLHRVGRAGRFGTKGLAISFIS…	100	0	gi|224013446|ref|XP_002296387.1|	dead box family RNA helicase [Thalassiosira pseudonana CCMP1335]	74.37	0	sp|Q0JM17|RH56_ORYSJ	DEAD-box ATP-dependent RNA helicase 56 OS=Oryza sativa subsp. japonica GN=AIP1 PE=1 SV=2	237	1e-71	COG0513	Superfamily II DNA and RNA helicase	L	Replication, recombination and repair	K12812|1|0.0|642|sita:101753358| ATP-dependent RNA helicase UAP56/SUB2 [EC:3.6.4.13]		GO:0003676//nucleic acid binding;GO:0005524//ATP binding;GO:0008026//ATP-dependent helicase activity	-
101	XP_002289358.1	ubiquitin activating enzyme 2, partial [Thalassiosira pseudonana CCMP1335]	106423	0.013	1	1	1.58	0.353	0.03104	XP_002289358.1	RQKAAFGHDTIARLKDLNVLIVGCMGVGVETAKNLILSNVGGVVLWDDTVCEQAHRGSNFYVTPEDCGGETTLAEASLWELRSLNPFCRVDILSSKTLDEKVVLTEDVLGTHRPYAAVVVTKLLPKKELFHLNLMARENGIAFIMALTNGVTSSIFSDFGNHHEITDATGEPTQTLAISNVEEGDVVVVVTVAQNDHGLEDGDVVVLEDMRDGMEGLNGKSVTVKRDPCVKSIDVFREYQSGGLLNQVRPPIIKPYKSLADTLEGTAVPQMLRGEDWELGKGVEVHLSLAAVLEFHDNHGHWPRLHNKDDAEKVVQLANEISDKRKKVEGACWGQSIQYGFPTGEARDLDVKRIARYSRLFVTELTGFCAFLGGAAAQEVIKKSGKFTPIDQWVHHDED…	100	0	gi|223999371|ref|XP_002289358.1|	ubiquitin activating enzyme 2 [Thalassiosira pseudonana CCMP1335]	34.44	4e-155	sp|A3KMV5|UBA1_BOVIN	Ubiquitin-like modifier-activating enzyme 1 OS=Bos taurus GN=UBA1 PE=2 SV=1	96.3	2e-19	COG5272	Ubiquitin	O	Posttranslational modification, protein turnover, chaperones	K03178|1|3e-145|461|gsl:Gasu_42920| ubiquitin-activating enzyme E1 [EC:6.2.1.45]	GO:0016567//protein ubiquitination	GO:0008641//small protein activating enzyme activity;GO:0005524//ATP binding;GO:0004842//ubiquitin-protein transferase activity	-
102	EED91332.1	oxygen-evolving enhancer protein 1 precursor [Thalassiosira pseudonana CCMP1335]	32211.5	0.134	4	29	4	1.099	0.002126	EED91332.1	MKLVAALSLVAGVSAFAPAQTNSRSTQLNAMKDDIAKVGAAALASAAIFGITAAPAQAITKSELNQLSYLQVKGTGLANRCSEVIGEDTITPKSGARLVDMCIEPKAWAVEEEIGKAGKTEKKFVNSKVMTRQTYTLEGIEGSLKTDGGKIVFTEEEGIDYAPTTVQLPGGERVPFLFTVKELVATGNGGAFKPGFQMGGDFSVPSYRTGLFLDPKGRGGVTGYDMAVALPGLQSGEEGDAELFKENNKTFEVGNGRIEMEVNKVNAEESEIGGVFVASQSGDTDMGSKVPKKILTKGIFYAKIQ	100	0	gi|224003107|ref|XP_002291225.1|	oxygen-evolving enhancer protein 1 precursor [Thalassiosira pseudonana CCMP1335]	48.4	2e-64	sp|P12359|PSBO_SPIOL	Oxygen-evolving enhancer protein 1, chloroplastic OS=Spinacia oleracea GN=PSBO PE=1 SV=1	-	-	-	-	-	-	K02716|1|7e-94|281|ccp:CHC_T00008339001|	GO:0042549//photosystem II stabilization	GO:0005509//calcium ion binding	GO:0019898//extrinsic component of membrane;GO:0009654//photosystem II oxygen evolving complex
103	EJK74797.1	hypothetical protein THAOC_03499 [Thalassiosira oceanica]	48911.2	0.101	2	12	1.3	0.167	0.03168	EJK74797.1	MPALSSTMKEGKVVSWLKGEGDSVEAGEAIMVVESDKADMDVEAFEDGFIAAIITEEGEAANVGSPVALIAANEADIPALKSYAATLGGAAPVAAAPTPAPAAAAAPKASPKAAANPAASAGGRVVASPLAKKMAEEMGVDLSTVSGTGPNGRITAADVTNAASGAAPAKKAAAPVKPRLCSSTLSWTPAPGVIAATPTARALAKKAKLDLASIPGTGEFGRVTADDVKIATGQMKPKRAKAAPGAPAPVEMPEGLVPFTGMQRAVSNNMVATLDCPVFRASREIEMDAFNALYQSVKPKGVTVSALLAKAVAKAIEKHPIVNSSFREEGTFFNKDINIAMAVAIDGGLITPVLKYANERDVLDIGENWKELVGKAKSGTLSPDEYNSGTFTISNMGMF…	100	0	gi|397641689|gb|EJK74797.1|	hypothetical protein THAOC_03499 [Thalassiosira oceanica]	47.83	3e-73	sp|Q9SQI8|ODP24_ARATH	Dihydrolipoyllysine-residue acetyltransferase component 4 of pyruvate dehydrogenase complex, chloroplastic OS=Arabidopsis thaliana GN=LTA2 PE=2 SV=1	359	9e-119	COG0508	Pyruvate/2-oxoglutarate dehydrogenase complex, dihydrolipoamide acyltransferase (E2) component	C	Energy production and conversion	K00627|1|8e-93|296|ccp:CHC_T00007488001| pyruvate dehydrogenase E2 component (dihydrolipoamide acetyltransferase) [EC:2.3.1.12]	GO:0006090//pyruvate metabolic process;GO:0006694//steroid biosynthetic process;GO:0009108//coenzyme biosynthetic process;GO:0006633//fatty acid biosynthetic process;GO:0006084//acetyl-CoA metabolic process;GO:0006790//sulfur compound metabolic process;GO:0006520//cellular amino acid metabolic process;GO:0006725//cellular aromatic compound metabolic process;GO:0046483//heterocycle metabolic proce…	GO:0004742//dihydrolipoyllysine-residue acetyltransferase activity	GO:0009941//chloroplast envelope;GO:0016020//membrane;GO:0022626//cytosolic ribosome;GO:0009570//chloroplast stroma;GO:0009534//chloroplast thylakoid
104	XP_002290777.1	predicted protein [Thalassiosira pseudonana CCMP1335]	26865.6	0.046	1	2	1.5	0.089	0.0008578	XP_002290777.1	MSYSEMSRDILAFMDKKQFSEAVIVGHSMGGKVAQSLALMHPDRVAGLVVLDIAPVRYYSDEKNGAKAGDGSAWKVVEEIVRSVAELNLEGCKTKRDVDAILRDGILEDPALRAFVLTNLEQIRSEDESEPPLKWKIHWEGIVNELDRIAGFDAHDEPLDELPLDDDNVSSEQLSRYKYEGDVFFIHGGASRFVRHSHISTIANFFPNHMLTTIRGVGHWVHAEAPDDTIALLKKYLDR	100	1e-165	gi|224002210|ref|XP_002290777.1|	predicted protein [Thalassiosira pseudonana CCMP1335]	28.69	1e-26	sp|Q8NFV4|ABHDB_HUMAN	Protein ABHD11 OS=Homo sapiens GN=ABHD11 PE=1 SV=1	133	2e-36	COG0596	Pimeloyl-ACP methyl ester carboxylesterase	HR	Coenzyme transport and metabolism;General function prediction only	K13703|1|7e-35|130|ccp:CHC_T00003707001| abhydrolase domain-containing protein 11	-	-	-
105	EJK45808.1	hypothetical protein THAOC_35560 [Thalassiosira oceanica]	62541.3	0.037	1	1	1.63	0.299	0.01399	EJK45808.1	MIRFGIAAIARSHRCCASLNCLPDRRNITRRQFSEEATLPLVDASAELSYATSSVRVGINLQVWPNSDSDKNRGGHVVLGANGSGKTLLCRTLIRSAEQTGSPEGSDEDLNLISGAISVHPRVESTNRNHQFMASVSFESHADLLSMDISVHKALIPGGGNRLSTTAKFLIVRLGMYPLLSKPVNALSTGQIRRVLVVRALVSKPEILLLDNAFDGLDAEGRKGLHDVIERVLSGFKMDVLVQGIDARETARTQVVLLSHRAEEISDGFRTFSFLNNRKMHTEHRNGRSPNELVRSIMNREDFPVRAWEAIDHYDVLNFWHGSDLRDNVKSVLIETKGFYFSQENNAILSDLSWSVRRGERWHLAGSNGSGKSTLSRLLVQASIGNHPEVTRGKLDVST…	100	0	gi|397567833|gb|EJK45808.1|	hypothetical protein THAOC_35560 [Thalassiosira oceanica]	26.35	6e-27	sp|P31060|MODF_ECOLI	Putative molybdenum transport ATP-binding protein ModF OS=Escherichia coli (strain K12) GN=modF PE=3 SV=2	168	6e-44	COG1119	ABC-type molybdenum transport system, ATPase component/photorepair protein PhrA	P	Inorganic ion transport and metabolism	K05666|1|6e-07|57.0|gra:105784041| ATP-binding cassette, subfamily C (CFTR/MRP), member 2!K05658|2|8e-07|56.2|spen:107004139| ATP-binding cassette, subfamily B (MDR/TAP), member 1 [EC:3.6.3.44]!K02021|3|1e-06|55.8|osa:4335787| putative ABC transport system ATP-binding protein	-	-	-
106	EJK55457.1	hypothetical protein THAOC_24814, partial [Thalassiosira oceanica]	24563.2	0.083	1	1	1.37	0.186	0.02148	EJK55457.1	GRRRQADLPGDRLGPERRGAQARPPPAGRGKKKADAEAEEPAFPSAEPATWEFLIKRTDGNGWITDAQAGSTVDVSQVMGGGFPMRENLEGFKYDFPTQNVLLFATGSGIAPIKSAIESGQLNISGGRTCTLYYGVRTPDDMPYVARFGDWEDAGVQVVPVVSRPDAPCESGAVWKGRTGYVQNALEEDGVAIPRNSGALLCGVKGMAESVTSMLTQSGVFEGRVLTNF	100	2e-150	gi|397591722|gb|EJK55457.1|	hypothetical protein THAOC_24814, partial [Thalassiosira oceanica]	35.36	4e-22	sp|P43394|K502_ACTDE	Fruit protein pKIWI502 OS=Actinidia deliciosa GN=pKIWI502 PE=2 SV=1	105	4e-26	COG0543	NAD(P)H-flavin reductase	HC	Coenzyme transport and metabolism;Energy production and conversion	K20784|1|9e-28|114|vcn:VOLCADRAFT_106094| arabinosyltransferase [EC:2.4.2.-]	GO:0055114//oxidation-reduction process	GO:0016491//oxidoreductase activity;GO:0005507//copper ion binding	GO:0009941//chloroplast envelope;GO:0009570//chloroplast stroma;GO:0009579//thylakoid
107	EED92233.1	thylakoid lumen 15.0-kDa protein, partial [Thalassiosira pseudonana CCMP1335]	21508.3	0.093	2	5	1.47	0.164	0.005788	EED92233.1	MSRRSALATVASILTTATAPLLLQPRPAFARLEGVNNPSLLPATPGLNVIQVEKFLTSGQEKRMNDLLERLEKDTGYRVRVLCQAYPRTPGLAIRDYWDLGKEVRERLLLTSSIAQHGNVLNFNVGDGVKFALPNVFWTRLTSKYGTTFFVKENGIDIAITNAIEAIVTCLRSEDQYCVNVPDEGVSLRSLGM	100	8e-128	gi|224001618|ref|XP_002290481.1|	thylakoid lumen 15.0-kDa protein [Thalassiosira pseudonana CCMP1335]	48.2	9e-38	sp|Q9LVV5|TL15B_ARATH	Thylakoid lumenal 15.0 kDa protein 2, chloroplastic OS=Arabidopsis thaliana GN=At5g52970 PE=1 SV=2	126	3e-34	COG1512	Uncharacterized membrane protein YgcG, contains a TPM-fold domain	S	Function unknown	K17600|1|7e-33|127|ats:F775_01418| vacuolar protein sorting-associated protein 54			GO:0044424//intracellular part
108	EED94751.1	canine-like rab-type small G protein [Thalassiosira pseudonana CCMP1335]	21884.9	0.166	2	5	1.23	0.115	0.02391	EED94751.1	MSNRVCHFKLVLLGDTAVGKSCLVVRFVRDEFFEFQEPTIGAAFLTQTVALDDATVKFEIWDTAGQERYRSLAPMYYRGAAAAIVVYDITNPDSFAGAKSWVKELQRRGDQDVVIAMAGNKADLEARRQVDFEEANAYAEENGILHMETSAKNANNVKALFVEIARRLPKSTQQPDREAFPIMPQKQESRNCC	100	2e-132	gi|223995249|ref|XP_002287308.1|	canine-like rab-type small G protein [Thalassiosira pseudonana CCMP1335]	70.35	8e-79	sp|Q58DS9|RAB5C_BOVIN	Ras-related protein Rab-5C OS=Bos taurus GN=RAB5C PE=2 SV=1	89.7	5e-21	COG1100	GTPase SAR1 family domain	R	General function prediction only	K07889|1|4e-76|229|ppp:PHYPADRAFT_188295| Ras-related protein Rab-5C	GO:0007264//small GTPase mediated signal transduction;GO:0015031//protein transport	GO:0005525//GTP binding	-
109	XP_002293378.1	predicted protein [Thalassiosira pseudonana CCMP1335]	28664.6	0.072	1	3	1.39	0.202	0.02132	XP_002293378.1	MKLTLLFASIIGSAAAFTSRSSPIATSRVSASSSSSALSATIAVFGASGLTASECVYQALKEGDKVVGLTRNPSNLVIPKGSGGSDADKPLTDPNLTLIGGSVTNPADVAKVFETPIDGVIVALGGKTSDVGDTMLTVGTNNIMAAMKENGVKRIAVVTSIGAGDSKDQAPFAFKLLMMTVMKKIFNDKNNQEAAVESSGLEYCIIRPGGLTVDAPTGVINVIEGEAGSIPRADVAQFCLEAVKDADFPYIGKCPCISSVGGTSWVKDRSKAARGEM	100	7e-180	gi|224008839|ref|XP_002293378.1|	predicted protein [Thalassiosira pseudonana CCMP1335]	27.72	1e-10	sp|P52556|BLVRB_BOVIN	Flavin reductase (NADPH) OS=Bos taurus GN=BLVRB PE=1 SV=2	130	2e-35	COG0702	Uncharacterized conserved protein YbjT, contains NAD(P)-binding and DUF2867 domains	R	General function prediction only	-		GO:0016491//oxidoreductase activity;GO:0000166//nucleotide binding	-
110	EJK47539.1	hypothetical protein THAOC_33731, partial [Thalassiosira oceanica]	103578	0.018	1	1	1.3	0.191	0.04141	EJK47539.1	VSSSDDEALLRSDVRTMGALLGDAISQHHGPEVFEKIEALRSMAKASRLAEADAGGSRLGPMVDFVSGLSEPELVVISRAFAHFLGIANAAEAHQRCRRLAEDSRREGAEGHLGALHETKRDSTAGVLAGFLDGGDGVRRDRAHRAPHAGQPPHAPREARAGPDRAHRGRPDPAVGHALRAEGARRRAPAGDRVDMADGRGVEGQAQSAERGREGDAGPRDGALGGPAEVPEEARRDHEGQDGGGVRTAAQGESVQVRVVDGRRSRRGAFDDVCNLALTAHTRLAGTKGNPNVVADVTREVTLTNRLKAAELFEKDVRELMSLISGNPPRGMNDTCQTESEAMDKVRARAGVESRAPFRSYLNPVATKLGKTADWARQELSKLQGEATPANTILPEDVY…	100	0	gi|397570934|gb|EJK47539.1|	hypothetical protein THAOC_33731, partial [Thalassiosira oceanica]	44.01	2e-163	sp|Q6F6Q6|CAPP_ACIAD	Phosphoenolpyruvate carboxylase OS=Acinetobacter baylyi (strain ATCC 33305 / BD413 / ADP1) GN=ppc PE=3 SV=1	511	1e-165	COG2352	Phosphoenolpyruvate carboxylase	C	Energy production and conversion	K01595|1|8e-163|505|brp:103866650| phosphoenolpyruvate carboxylase [EC:4.1.1.31]	GO:0006107//oxaloacetate metabolic process;GO:0015977//carbon fixation;GO:0006099//tricarboxylic acid cycle	GO:0000287//magnesium ion binding;GO:0008964//phosphoenolpyruvate carboxylase activity	-
111	EJK62096.1	hypothetical protein THAOC_17307, partial [Thalassiosira oceanica]	21590.1	0.05	1	1	1.26	0.178	0.04856	EJK62096.1	MTASPLSNPLTVLIVTKLMWEAVETPRPSAWRVIFKGLTLLEHLVKNGSERCVDDARNHSHLLRNMEKFNYYEGTVDRGVGVREKSRQIVEMLGDDERIREERMKARQLREKFAGRGMAASNKGQSRSGGGGGGGGGRGSSTSGYGNSDAAWARAGSSTSGTRATGRYGGSVPDAKPASSTRVKKSKKKERKEKPAPAAA	100	2e-109	gi|397613230|gb|EJK62096.1|	hypothetical protein THAOC_17307, partial [Thalassiosira oceanica]	52.27	6e-22	sp|P78813|YCTB_SCHPO	ENTH domain-containing protein C794.11c OS=Schizosaccharomyces pombe (strain 972 / ATCC 24843) GN=SPCC794.11c PE=1 SV=2	-	-	-	-	-	-	K12471|1|4e-18|85.5|sot:102599600| epsin	GO:0044238//primary metabolic process;GO:0044260//cellular macromolecule metabolic process	GO:0003723//RNA binding	-
112	EED92420.1	v-type h-atpase [Thalassiosira pseudonana CCMP1335]	93076	0.093	1	4	0.75	0.104	0.0241	EED92420.1	MSRWFRSEHMEYISLIVNEDAAHDCLADLGKLSAIQFTDLNPDLTPFQRRYVSYVRRCDELERKLRFFGNECDNFGLKLDTAGDIDTFLESPTALLESLEVELEGYESQLKELNAYSEKLTREYNEKVELQEVLEKARRFFMTDAPRLAVSELSGGRKPGSGSNQGLLAGAHDAEARDMDMRFSSITGVVSTEEKVRFERMIFRATRGNCYVRFAPIKQPITDPESGSLIEKCVFIVFFKSLSIETKLKKICDAFFAHRYSLPDMDDAPAVDRMLTENAQELVDSRTVLLKNQDTRFRLCQMLAQHTERWTWIVLREKAVYHTLNMFKADVSGMLRGEGWVISESFEDIRMSVNRAHSEMDHNMPSHVDQVPKPWPTPPTHFTTNKFTYGYQEFVNTYG…	100	0	gi|224001992|ref|XP_002290668.1|	v-type h-atpase [Thalassiosira pseudonana CCMP1335]	39.3	5e-180	sp|Q54E04|VATM_DICDI	Vacuolar proton translocating ATPase 100 kDa subunit OS=Dictyostelium discoideum GN=vatM PE=1 SV=2	95.9	1e-18	COG1269	Archaeal/vacuolar-type H+-ATPase subunit I/STV1	C	Energy production and conversion	K02154|1|6e-178|535|mis:MICPUN_97767| V-type H+-transporting ATPase subunit a	GO:0015991//ATP hydrolysis coupled proton transport	GO:0016787//hydrolase activity;GO:0015078//hydrogen ion transmembrane transporter activity	GO:0000220//vacuolar proton-transporting V-type ATPase, V0 domain
113	EJK69682.1	hypothetical protein THAOC_09034, partial [Thalassiosira oceanica]	67537.2	0.056	2	3	1.5	0.329	0.04757	EJK69682.1	MRSDPEVREPGDPNNMGLGWRQVCPGPEGNIVGPLLLNQLGENNLGVVVIVLVRGHPQPPSDGHDDDGHKHPDGREGDAEGHDRLSVDEGPEPALPVYAVRYLDSSPDGRQHGQLVAVDVHHLRWLVSATMAIVSKITSVSRPPVAHAWPAAASTLPSVRRHRQRAASADRGLRVQAAPKAQRREILSWRRRSSREGLPVEDIDRRSNDSGSGGQSMAISNSGQAPETSYRQLQNAAACPSAPYGEMFKLEVPSLMVGTLDSLMNLSDDLGKTDSIIESIVRKVEKSSVELAGRKGGDLTVGGVPSGRYVQQFAWDYAKFPNRRPLKELVSLIAGGVSAIDEELKQLSNSYGEKQVALQDAKRKRGGNLMTADLNDVLDEKVMRNVSVKDTEYLRTLFV…	100	0	gi|397630214|gb|EJK69682.1|	hypothetical protein THAOC_09034, partial [Thalassiosira oceanica]	32.77	1e-48	sp|Q7T385|VTC1A_DANRE	V-type proton ATPase subunit C 1-A OS=Danio rerio GN=atp6v1c1a PE=2 SV=1	-	-	-	-	-	-	K02148|1|2e-52|187|cre:CHLREDRAFT_187322| V-type H+-transporting ATPase subunit C	GO:0009987//cellular process	GO:0016820//hydrolase activity, acting on acid anhydrides, catalyzing transmembrane movement of substances	GO:0043231//intracellular membrane-bounded organelle;GO:0044444//cytoplasmic part;GO:0033180//proton-transporting V-type ATPase, V1 domain
114	XP_002292310.1	thiamin biosynthesis protein [Thalassiosira pseudonana CCMP1335]	71790.8	0.027	1	1	1.54	0.301	0.02492	XP_002292310.1	MKFRSMAVATAIAPTTLAFVSPSISSSNTHRSSLQVLTNSIDTSNVTSTADISSLVTKEANIKSTTRTKPTLDPFNPEFNRIQSVPYNDAFPQSTKEYTSVTHEPTRHQLQVPFRRVHLEDPEQPYLDLYDTSGPRDIDPKQGLPKVREEWIAAREGKYQRYTQMHFAKLGIITEEMQFVAVREGVDVEFVRSEVARGRAIICSNKNHLELEPQIIGRFFKVKINANIGNSAITSSIEEEVEKLQWSTLWGGDTLMDLSTGKHIHETREWIMRNSPIPVGTVPIYQALEKVDGIAEDLTWEVFKETLLEQAKQGVDYFTIHAAVLLRYVPMTVSRKTGIVSRGGSIHAKWNIFHHRENFAYEHWDEILDICSEYDIALSIGDGLRPGSIYDANDESQFA…	100	0	gi|224006700|ref|XP_002292310.1|	thiamin biosynthesis protein [Thalassiosira pseudonana CCMP1335]	72.13	0	sp|O82392|THIC_ARATH	Phosphomethylpyrimidine synthase, chloroplastic OS=Arabidopsis thaliana GN=THIC PE=1 SV=1	734	0	COG0422	Thiamine biosynthesis protein ThiC	H	Coenzyme transport and metabolism	K03147|1|0.0|890|thj:104800721|	GO:0009228//thiamine biosynthetic process	GO:0051536//iron-sulfur cluster binding;GO:0016829//lyase activity;GO:0008270//zinc ion binding	-
115	EJK67319.1	hypothetical protein THAOC_11662, partial [Thalassiosira oceanica]	19020.9	0.128	1	2	1.27	0.097	0.008147	EJK67319.1	FKQKVSEGSMTARVRVGAGIDNVAGVKLPIFTYFETGAATDNASLGLVGGGKKIQLVREKYSHLLQNLIKLASLQTSFVTLDEAMKVTNRRVNALENVTIPRIQGVLDYIDRELDELEREDFTRLKLVQGKKEVAMEEARKENEAKGVNRMKANEADITSNYDAGDDADVVF	100	7e-104	gi|397624249|gb|EJK67319.1|	hypothetical protein THAOC_11662, partial [Thalassiosira oceanica]	47.85	1e-26	sp|O97755|VATD_RABIT	V-type proton ATPase subunit D OS=Oryctolagus cuniculus GN=ATP6V1D PE=2 SV=1	80.5	2e-17	COG1394	Archaeal/vacuolar-type H+-ATPase subunit D/Vma8	C	Energy production and conversion	K02149|1|2e-29|110|apro:F751_2657| V-type H+-transporting ATPase subunit D		GO:0022857//transmembrane transporter activity;GO:0016787//hydrolase activity	-
116	XP_002296881.1	hypothetical protein THAPSDRAFT_42612 [Thalassiosira pseudonana CCMP1335]	35617	0.269	1	1	1.25	0.08	0.005952	XP_002296881.1	MTGTNGNGASNGGAKVGTDKVKMGLAQMLKGGVIMDVMNVEQAKIAEAAGAVAVMALERIPADIRRDGGVARMSDPAMILEIKNAVTIPVMAKARIGHYVEAQILEACEIDYIDESEVLTMADEVNHIDKTQFGVPFVCGCRNIGEALRRVAEGAAMLRTKGEAGTGNIVEAVRHARTVQSDIKRLTCMSKDELFVAAKNLQAPYELVKYVADNGRLPVVNFAAGGVATPADAALMMQLGMDGVFVGSGIFKSANPEARAAAIVKAVTHYKDPKVLMEVSTGLGPAMVGISDIKGDAVNFRDREGGEYVYEGKVPPKVALHGATETQMYGSSWNN	100	0	gi|224014437|ref|XP_002296881.1|	hypothetical protein THAPSDRAFT_42612 [Thalassiosira pseudonana CCMP1335]	76.28	5e-126	sp|B8G663|PDXS_CHLAD	Pyridoxal 5'-phosphate synthase subunit PdxS OS=Chloroflexus aggregans (strain MD-66 / DSM 9485) GN=pdxS PE=3 SV=1	426	3e-149	COG0214	Pyridoxal biosynthesis lyase PdxS	H	Coenzyme transport and metabolism	K06215|1|9e-125|363|mis:MICPUN_107893| pyridoxal 5'-phosphate synthase pdxS subunit [EC:4.3.3.6]	GO:0042823//pyridoxal phosphate biosynthetic process	GO:0003824//catalytic activity	-
117	EJK74565.1	hypothetical protein THAOC_03743, partial [Thalassiosira oceanica]	25107.8	0.047	1	1	1.54	0.322	0.03029	EJK74565.1	LPGDKLDGEIGVNAAANVLLQAMAYQPYARNSTLCAAGSMPADSALDAAAWNDMFLCLSGPELLRIEAGSGTDVKEALFDPKFEQLAEYVQGWSTQYEGDRKGTGLTTPVLVRRSRKPSASEIDGVAARQGIRILFQSTNTGDRYKSASEEKADEKERSGGGTTTRASPTKLVGKPSKEGGVEVLIEKTTGGTIRVRARRCNMGDKTIVKEMSEEVIVKNLKRAVTAWVEAR	100	4e-160	gi|397641279|gb|EJK74565.1|	hypothetical protein THAOC_03743, partial [Thalassiosira oceanica]	-	-	-	-	-	-	-	-	-	-	-	-	-	-
118	XP_002296122.1	predicted protein [Thalassiosira pseudonana CCMP1335]	30142.5	0.061	1	1	1.78	0.347	0.01093	XP_002296122.1	MNSFTQSSLLAAMILSFQSTAAFQSSGTDVWLVSSSRTHCTSLTADTSGDIPQSIRSPVLAQVYQALVSHNEKYGNPNIPLGSADGKRCKTLRRLHFQGKLSEDDVALLNGMGFRFHSFEDVYTECDFGEMLEKLMEYHDEFQTFQIPKKYEPDPELGAWVTMLRRLYLTDDLPQDQLDKMNAVNFEWISTRKCGSTFMSRYREVLTQLTDAVDAGEDISQLMSEDEELRKWISAQQSAYENGKLSESRVQYMNDLPGIDWRS	100	0	gi|224004942|ref|XP_002296122.1|	predicted protein [Thalassiosira pseudonana CCMP1335]	-	-	-	-	51.6	9e-06	COG1061	Superfamily II DNA or RNA helicase	KL	Transcription;Replication, recombination and repair	-	-	-	-
119	EJK60928.1	hypothetical protein THAOC_18653, partial [Thalassiosira oceanica]	45823.8	0.034	1	2	1.25	0.052	0.001721	EJK60928.1	MATVHRDRAVRARGSPPRLPRPRLSGSLGPCRRWRRRRLVGTSDRYHHRHRPRHHVQLRGRLPERPAGDNTERPGEPHHAVVRGVHVGRGGREADWRLVSLLGLCVCTSFSALTRIIENFSAKNQATINPRNTIFDVKRLIGRKYEDRSVQEDIRLVPYDVVPSGDDGRPYISVVSDDGIGRSRYAPEEVSAMVLGKLKSDAERYLGRPVDRAVVTVPAYFNDAQRHSTRDAGVIAGLTVERIINEPTAAAIAYGIGQDGKPRDEDEEEENVLVFDLGGGTFDVTLLTIDGGIFEVLATNGDTHLGGSDVDHIVMSHFMEMIRRKDGRDISSDRRALQKLRRECERIKRALSGQLSARLDVEDLVPGYDFTATLTRAKFEELTEDLFRRTLVPVKRVLE…	100	0	gi|397610615|gb|EJK60928.1|	hypothetical protein THAOC_18653, partial [Thalassiosira oceanica]	61.27	2e-117	sp|O24581|BIP3_MAIZE	Luminal-binding protein 3 OS=Zea mays GN=BIPE3 PE=2 SV=1	264	1e-80	COG0443	Molecular chaperone DnaK (HSP70)	O	Posttranslational modification, protein turnover, chaperones	K09490|1|1e-119|355|bna:106349625| heat shock 70kDa protein 5		GO:0005524//ATP binding	-
120	EJK60504.1	hypothetical protein THAOC_19126, partial [Thalassiosira oceanica]	21289.5	0.061	2	7	1.82	0.422	0.01671	EJK60504.1	RFFGIGLVKMMDIVGIEQDMSVAYDVMEDWVGTCLGKPHYTACADSDLYFKQKGKLDMMETMMKEIEIREKKRMADRLEAKAEMALLAAEKAEKMQEQIDLEAAKESRKHKCRGIRCPSAMEPFQICSPVHLFTHNSSEVHYSEWQKSHQQILLIWTKLCAVARTMLSHRKGEKLVEEDNY	100	8e-117	gi|397609766|gb|EJK60504.1|	hypothetical protein THAOC_19126, partial [Thalassiosira oceanica]	-	-	-	-	-	-	-	-	-	-	-	GO:0010027//thylakoid membrane organization;GO:0015979//photosynthesis		GO:0009523//photosystem II
121	EJK63233.1	hypothetical protein THAOC_16119 [Thalassiosira oceanica]	130035	0.028	1	1	1.37	0.118	0.005554	EJK63233.1	MMSLAITFDGGTSRIQSVEGPLLLANYQSKLGRSEASLHNEKQTGELRPFRTLKIFEDPPQATMNGCVPNQTKSGPAVIDPAAAVRADRKHKTPAPTIVGKARWTWADQRLLLSQRTEWNDNAFREHARPSQQSDPPTTTKELSARASSSIAPPKFVTADVSRVSVPPRRQRRREAVVFGVRPAQCRDATEVEERAAESTANEQYDALNKSSGLTGSYDPSLFESEIYSWWEKAGCFDPDAKQSADSARSAGREPYVLPMPPPNVTGRLHMGHAIFVALQDVLARFHRMRGRPVLWTPGTDHAGIATQLQVEKALQSEGKRRGTDVEIANASDEEKEKLVGRTEFLEKVWEYKEEGGAITSQLRSLGASADWTRERFTMDPALSVGVTEAFNRLHEKGL…	100	0	gi|397615119|gb|EJK63233.1|	hypothetical protein THAOC_16119 [Thalassiosira oceanica]	51.84	0	sp|F4KE63|SYVM2_ARATH	Valine--tRNA ligase, chloroplastic/mitochondrial 2 OS=Arabidopsis thaliana GN=EMB2247 PE=3 SV=1	876	0	COG0525	Valyl-tRNA synthetase	J	Translation, ribosomal structure and biogenesis	K01873|1|0.0|1023|ppp:PHYPADRAFT_128528| valyl-tRNA synthetase [EC:6.1.1.9]	GO:0006438//valyl-tRNA aminoacylation;GO:0006450//regulation of translational fidelity	GO:0004832//valine-tRNA ligase activity;GO:0002161//aminoacyl-tRNA editing activity;GO:0005524//ATP binding	GO:0005737//cytoplasm
122	EJK44301.1	hypothetical protein THAOC_37170 [Thalassiosira oceanica]	46921.2	0.095	3	5	0.89	0.056	0.02979	1.53	1.091|1.567|1.404|2.048	0.399	4	0.05541	0.55	0.608|0.463|0.646|0.494	0.088	4	0.004875	0.81	0.644|0.936|0.668|0.979	0.175	4	0.1242	0.6	0.720|0.547|0.653|0.499	0.1	4	0.00855	EJK44301.1	MSSETKPKVVLAYSGGLDTSVILKWLCEKGFEVVAFCADVGQHHEDFEAVKAKAVSCGAVKCVVTDLRAEFVTDYIFEALKCNAIYEGRYLLGTSVARPCISKEMIRIAKAEGAQYIAHGATGKGNDQVRFEMCAQALDAKIGCIAPWRDAEFIESFKGRKDLLAYCTKHGIPVDAKPKSNYSIDENLFHTSYESGCLEEADVTYEEDMFKMTVSPQNAPESSTDIEIEFVKGVPVKLTNKTDGTVKTDPLELFMYANEIAGANGVGRIDIVENRFVGIKSRGVYETPGGTLLREAHMDLEGICMDREVKRISEHMAGEFARLCYNGFWFAPEMDLVRNSVTFSQKDVTGVVKLELYKGNVICRGRSSPNALYNPDLASMDIEGGGDNFDYNPSDAAGF…	100	0	gi|397564676|gb|EJK44301.1|	hypothetical protein THAOC_37170 [Thalassiosira oceanica]	60	4e-177	sp|B9K8S7|ASSY_THENN	Argininosuccinate synthase OS=Thermotoga neapolitana (strain ATCC 49049 / DSM 4359 / NS-E) GN=argG PE=3 SV=1	100	0	tr|K0R6N9|K0R6N9_THAOC	Uncharacterized protein OS=Thalassiosira oceanica GN=THAOC_37170 PE=3 SV=1	gi|408421498|ref|YP_006762912.1|	500	1e-175	COG0137	Argininosuccinate synthase	E
123	EED96217.1	predicted protein [Thalassiosira pseudonana CCMP1335]	46964.5	0.087	3	9	1.61	0.105	0.000707	EED96217.1	MKFSILSFLLATSSTTPSDAFTLTMGTGNSFGRLFRISTWGESHGGGVGVTLDGCPPRIPITREEIQIDLDRRRPGQSRITTPRNEADAVEILSGLNPEDITLGTPIGMLVRNKDQRSGDYLENDMSVAYRPSHADATYDAKYGVRAIAGGGRSSARETIGRVAAGAVARKILRMYNGIEVLAYVSKVQDIEATNVNHDTFTMEEVDANIVRCPDEASAERMLERIDEIRKSGNSIGGVVTCVARNVPAGLGAPVFDKLEADLAKACMSIPAAKGFESGDGFGGTLLTGKDHNDEFYIDEETGATRTRTNRSGGIQGGISNGENVVVHVAFKPTSTIAQSQKTVTRDGQEVELRGKGRHDPCVLPRAVPMVEAMVALTLVDALLCQKAQCELFPNEAPM…	100	0	gi|223993785|ref|XP_002286576.1|	predicted protein [Thalassiosira pseudonana CCMP1335]	66.22	2e-178	sp|P57720|AROC_ARATH	Chorismate synthase, chloroplastic OS=Arabidopsis thaliana GN=EMB1144 PE=2 SV=2	506	3e-178	COG0082	Chorismate synthase	E	Amino acid transport and metabolism	K01736|1|0.0|541|cme:CYME_CME064C| chorismate synthase [EC:4.2.3.5]	GO:0033587//shikimate biosynthetic process;GO:0009423//chorismate biosynthetic process;GO:0009073//aromatic amino acid family biosynthetic process	GO:0004107//chorismate synthase activity	GO:0005730//nucleolus;GO:0009507//chloroplast
124	EED94042.1	Hypothetical protein THAPSDRAFT_32704, partial [Thalassiosira pseudonana CCMP1335]	32900.6	0.163	2	4	1.31	0.188	0.03585	EED94042.1	MKSPDVESREKTINIHSRVKAQRAQNVFAEPLDMSEDFVIPNFPKSDAAVQFIDDSLADNFIFASLTKEERRLLIDAMKADTVPAGTIIIAQGDIGDYFYVVEDGQISFAVDGNHVGACTRGASFGELALLYNCPRAATCIANTNCRLWKVDQRTFRYMLANNNASQQKDTIDVLRKVQFLADLDESMLIKIADALTTVSFQAGERIINKGDVGEVFYILKEGRVRVHDIGFGDSQYVDQILGPGDFFGERALLTGDPRLANITAETASVTLCLSRETFEKTLGPLQDLIDHAMK	100	0	gi|223997866|ref|XP_002288606.1|	Hypothetical protein THAPSDRAFT_32704 [Thalassiosira pseudonana CCMP1335]	40.29	1e-58	sp|Q6CPK7|KAPR_KLULA	cAMP-dependent protein kinase regulatory subunit OS=Kluyveromyces lactis (strain ATCC 8585 / CBS 2359 / DSM 70799 / NBRC 1267 / NRRL Y-1140 / WM37) GN=PKAR PE=3 SV=1	95.5	3e-21	COG0664	cAMP-binding domain of CRP or a regulatory subunit of cAMP-dependent protein kinases	T	Signal transduction mechanisms	K19477|1|2e-43|160|cre:CHLREDRAFT_131695| cGMP-dependent protein kinase 2 [EC:2.7.11.12]!K04739|2|3e-43|152|ppp:PHYPADRAFT_114967| cAMP-dependent protein kinase regulator	GO:0001932//regulation of protein phosphorylation	GO:0008603//cAMP-dependent protein kinase regulator activity;GO:0016772//transferase activity, transferring phosphorus-containing groups	GO:0005952//cAMP-dependent protein kinase complex
125	EED93221.1	asparaginyl-trna synthetase [Thalassiosira pseudonana CCMP1335]	54265.9	0.055	2	3	1.3	0.178	0.03396	EED93221.1	MTNSDATVSPPRVKTAEAQVSEDPVSVKGWVKTVRKQKTLAFVEVNDGSNMGGIQCVVPFDGVDEDTLAAIDNLTTGCSVHATGLIVNSQGGKQSVELSASSLRVVGTCPGETFPLAKKRHSLEYLRTIAHLRPRTNTIAAVARVRSTLAGSIHSFFQGEGFQYVQTPLITASDCEGAGEMFRVTTLNTDDVSSLPRAKDEDGKELPGVDYTEDFFGKAAFLTVSGQLGGETYACALGDVYTFGPTFRAENSQTARHLAEFWMVEPEMAFADLTSAMDNAESMLKSVVGEVLEKCDEDLTFFANFFDKGLKNRLKKVVEKPFVRVAYRDAIGYLQEEIAKDPSKWQFPEVEFGTDLATEHERWLAETKFESAVFVYNYPKKIKAFYMRDNDEDGGETVN…	100	0	gi|224000023|ref|XP_002289684.1|	asparaginyl-trna synthetase [Thalassiosira pseudonana CCMP1335]	54.86	9e-174	sp|Q6MEC9|SYN_PARUW	Asparagine--tRNA ligase OS=Protochlamydia amoebophila (strain UWE25) GN=asnS PE=3 SV=1	540	0	COG0017	Aspartyl/asparaginyl-tRNA synthetase	J	Translation, ribosomal structure and biogenesis	K01893|1|0.0|523|gsl:Gasu_07450| asparaginyl-tRNA synthetase [EC:6.1.1.22]	GO:0006421//asparaginyl-tRNA aminoacylation	GO:0004816//asparagine-tRNA ligase activity;GO:0003676//nucleic acid binding;GO:0005524//ATP binding	GO:0005737//cytoplasm
126	EJK67647.1	hypothetical protein THAOC_11293 [Thalassiosira oceanica]	44048.4	0.054	1	1	1.32	0.121	0.009987	EJK67647.1	MQIRRRLKIASTLLSSATRSSSLSAWASRGKAFVTSPPSRAVRTNFNYYLRPLLAQRQDPTTPKTLAFPTSAYLQSLHTNNSIMTTITYSVLAEQNAATTNQIIDHYESNSAFQSLSKSEGDSTLRRDCEDGEKLQRGIDLARERGVLDPNFVPEQYISIDVLGKTPDQVADEILGTVKERSKGGSGGGLVILCGLSGTGKGTTVATLKSKLETQDGKTVVCWSNGNVFRSLTLLAVTWCEQQSDCDGFDPAKALTSENLASFAGMLEFGKFNGRFDTKICGLGLDLLVSEVQNTVLKGPKVSKNIPTVAEVTQGEVVMFASSAVKQMGEDGIFVLLEGREQTVNYFRTPLRFTLTLSDPSLIGKRRAAQRLAAAALGDVKESSTAEEIEKAMDSQLAM…	100	0	gi|397625046|gb|EJK67647.1|	hypothetical protein THAOC_11293 [Thalassiosira oceanica]	-	-	-	-	-	-	-	-	-	-	-	-	-	-
127	EJK49867.1	hypothetical protein THAOC_31210 [Thalassiosira oceanica]	44812.1	0.022	2	7	1.75	0.298	0.0078	EJK49867.1	MSKDAPNKAATATEPACPVSPLGNLAIPPPSHYKPNSDGNTVVLGIEGSANKCGVGILCYNPKDETYQTLSNPRKTYVSPKGCGFLPKETAWHHQAHVVALVRAALDEAYPGEPSPERYLSGIAFTLGPGMGGPLKSCAMAARTLSLIWKLPLIAVNHCIAHIEMGRVATSASDPVVLYVSGGNTQVIAYSDGRYRIFGETIDIAVGNCLDRFARVVGLSNDPSPGYNIELEARKHTAENQLKFVELPYVVKGMDVSFSGLLTFIEDMTKKKTFVGDGPRENDDQLTTADLCYSLQETIFAMLIEITERTMAHCGQNSVLIVGGVGCNKRLQGMMADMVVDRGGTLCAMDHRYCIDNGAMIAQAGIFGLQYGSNDMVVEMKDTECTQRFRTDAVEAIWR…	100	0	gi|397575745|gb|EJK49867.1|	hypothetical protein THAOC_31210 [Thalassiosira oceanica]	57.1	3e-140	sp|Q0CH39|KAE1_ASPTN	tRNA N6-adenosine threonylcarbamoyltransferase OS=Aspergillus terreus (strain NIH 2624 / FGSC A1156) GN=kae1 PE=3 SV=1	286	5e-90	COG3642	tRNA A-37 threonylcarbamoyl transferase component Bud32	J	Translation, ribosomal structure and biogenesis	K01409|1|2e-150|432|csl:COCSUDRAFT_27017| N6-L-threonylcarbamoyladenine synthase [EC:2.3.1.234]	GO:0006508//proteolysis	GO:0004222//metalloendopeptidase activity	-
128	EED92502.1	phosphoglycerate mutase [Thalassiosira pseudonana CCMP1335]	32673.8	0.133	1	2	1.46	0.198	0.01256	EED92502.1	MKSSTLLFLLASIGSTSGFVAPVTRTTFTANPTCTELYNHKLVLVRHGESTWNDLNIFTGWADADLNEKGKAEALAGGKLIKEAGFTFDVAYTSVLKRAIKTLWIILEEMDLMYIPIVNTWRLNERHYGGLQGLNKQETVDEYGKDQVLIWRRSYDIPPPECDESSEYYPGNDPRYANVDKADLPKTESLKLTEDRFMPVWENEIAPAIKSGKKVLIAAHGNTLRALVKHLDNISSDTIAELNIPTGVPLVYELDDDLNVVPNENAIAPLQGMYLGNLDDVKARIAGVANQTK	100	0	gi|224002156|ref|XP_002290750.1|	phosphoglycerate mutase [Thalassiosira pseudonana CCMP1335]	63.78	3e-117	sp|Q54NE6|PGAM_DICDI	Probable phosphoglycerate mutase OS=Dictyostelium discoideum GN=gpmA PE=1 SV=1	339	1e-116	COG0588	Phosphoglycerate mutase (BPG-dependent)	G	Carbohydrate transport and metabolism	K01834|1|2e-76|235|cre:CHLREDRAFT_99328| 2,3-bisphosphoglycerate-dependent phosphoglycerate mutase [EC:5.4.2.11]	GO:0006096//glycolytic process	GO:0046538//2,3-bisphosphoglycerate-dependent phosphoglycerate mutase activity	-
129	XP_002287176.1	predicted protein [Thalassiosira pseudonana CCMP1335]	43629.3	0.028	2	3	1.25	0.057	0.002238	XP_002287176.1	MKFAAALFLLASGANGFSATTNTQPVPTTNIDANGKTIDPLLIRAARGETTERVPVWMMRQAGRHIKEYRDLCKKYPTFRERSEIPEVAVEVSLQPWRNYQTDGCILFSDILTPLPGMGVEFDIDEKVGPVVKPMRTWDDVNKMHLIDPSKSIPFTAEALRILRQEVTPETAVLGFVGCPYTLATYLVEGKTSKEYLEIKKMAFTEPKLLHAILKNLSESIAEYALFQIENGAQLIQIFDSWAGHLSPRDYDEFAAPYQKVILDKIKEKYPTVPTVTYIKHSGALIERMAATGVDVVSLDWTVDMAEGRERIAAGRAKAGLEGPGGVQGNLDPGVLFGDFATIKERAEEIMKKAGPTGHVMNLGHGIEAATPEENAAYFIETVRNYRHEGQE	100	0	gi|223994985|ref|XP_002287176.1|	predicted protein [Thalassiosira pseudonana CCMP1335]	56.2	6e-141	sp|B1XIF6|DCUP_SYNP2	Uroporphyrinogen decarboxylase OS=Synechococcus sp. (strain ATCC 27264 / PCC 7002 / PR-6) GN=hemE PE=3 SV=1	411	6e-142	COG0407	Uroporphyrinogen-III decarboxylase	H	Coenzyme transport and metabolism	K01599|1|5e-140|408|gsl:Gasu_52210| uroporphyrinogen decarboxylase [EC:4.1.1.37]	GO:0006779//porphyrin-containing compound biosynthetic process	GO:0004853//uroporphyrinogen decarboxylase activity	GO:0005737//cytoplasm
130	EJK63057.1	hypothetical protein THAOC_16308 [Thalassiosira oceanica]	76305.5	0.035	2	2	1.21	0.089	0.01435	EJK63057.1	MVAAIRSTALRALRSSSSNWGVTAMPAVPGSSARGLGGAAASQAWNDDTAAGSGRYALAVLAAAATAGFAATSDGRRADCTAIAAVVGSKSFDARDFLLDGLEKIKSTRGYDGAGMATMAPDASGMVVVKKSSLDSKADPIALVRDASRPIMGHSVGIAHTRWATVGSITDKNAHPHLDATGKIAVVHNGSIFNRNELRKELKGLGYKLEGQTDTEVIAKLIGHYYDGGKILFDKAVEKAMGRCEGTWGLVVMCNDSPEELVCTSRGSPLYIGVGDDGTFVASNPSAFKGYSRNFIKLDDMEVATITVDGRNLDMTKVIKPETRWQEINEEQASPAPYPHWFIKEIMEQPQAIGRALGFGGRLFLDKATLGGLDDNYEKLKGIENLAVVGCGSSLNAAN…	100	0	gi|397614851|gb|EJK63057.1|	hypothetical protein THAOC_16308 [Thalassiosira oceanica]	32.75	7e-101	sp|Q8KG38|GLMS_CHLTE	Glutamine--fructose-6-phosphate aminotransferase [isomerizing] OS=Chlorobium tepidum (strain ATCC 49652 / DSM 12025 / NBRC 103806 / TLS) GN=glmS PE=3 SV=3	347	7e-109	COG0449	Glucosamine 6-phosphate synthetase, contains amidotransferase and phosphosugar isomerase domains	M	Cell wall/membrane/envelope biogenesis	K00820|1|4e-69|242|ccp:CHC_T00000154001| glucosamine--fructose-6-phosphate aminotransferase (isomerizing) [EC:2.6.1.16]	GO:0016051//carbohydrate biosynthetic process	GO:0004360//glutamine-fructose-6-phosphate transaminase (isomerizing) activity;GO:0030246//carbohydrate binding	GO:0005737//cytoplasm
131	EJK58513.1	hypothetical protein THAOC_21355, partial [Thalassiosira oceanica]	44953.7	0.102	1	2	1.33	0.149	0.01536	EJK58513.1	TAGNAAKVVVGGGAAVYGFNYYSENNAAAAADRERQLKLILGGDDEDDDDYDDDYDDDEDDDYEAFMKSKSGPPKASPASKPAQPKAEATPPPPAPTPPPPAPRPAPKPKKKLGIFARRKADARETDLAALVSPGAEAPEFATLLAQILTFGAPGRFPDVADLGPPPLETFDLDGARGMLAGSRSDLGLSDERSAEIFANVVNCMIIDIVDLAMSPLRGKDKDEKVAVDAINVVMDFMDHAASIFDAVAEGVTIKPVTYGGSLRRKDLEQMFSVYAGSTMGGLMSMDGGGATQDRVDTLQLVFGITDKKAEGLMQKHMMKTMMNMMKNPDAIKDMPGMEGMEEMMKMMGGEGGLPGMGMPGMDGADLSPEELKQTVSMMKELMDSGQVSEAELDEIRKQ…	100	0	gi|397603766|gb|EJK58513.1|	hypothetical protein THAOC_21355, partial [Thalassiosira oceanica]	-	-	-	-	-	-	-	-	-	-	-	-	-	-
132	XP_002293525.1	predicted protein [Thalassiosira pseudonana CCMP1335]	28099.2	0.056	1	3	1.22	0.097	0.01503	XP_002293525.1	MFSGMHRASLTGLAKSTVTLTNAKGMFSSTLAEYCMMACSYFAKDLPRLMQQKRNLHWEQYPVLELRGATLGVVGYGDIGRASAKLAKAYGMKVIGVKRNPVSFRDEYCDVMYGTDKLNTLMEESDYVLISTPLTEQTRNMISKEMLSNCKPSTVIINVGRGPIIDEEALIEALQNRAIKGAGLDVMTVEPLPKSSPLWKLDNVLLSPHNMDMTLTFMRESTEFFVKENLPRWLRGMEVLNQVDKVAGY	100	0	gi|224009133|ref|XP_002293525.1|	predicted protein [Thalassiosira pseudonana CCMP1335]	32.17	1e-35	sp|Q2VEQ7|DDH_HALMT	D-2-hydroxyacid dehydrogenase OS=Haloferax mediterranei (strain ATCC 33500 / DSM 1411 / JCM 8866 / NBRC 14739 / NCIMB 2177 / R-4) GN=ddh PE=1 SV=1	209	4e-65	COG0111	Phosphoglycerate dehydrogenase or related dehydrogenase	HR	Coenzyme transport and metabolism;General function prediction only	K15919|1|1e-27|111|fve:101311808| hydroxypyruvate reductase 2!K00049|2|2e-26|108|gsl:Gasu_47310| glyoxylate/hydroxypyruvate reductase [EC:1.1.1.79 1.1.1.81]	GO:0055114//oxidation-reduction process	GO:0000166//nucleotide binding;GO:0048037//cofactor binding;GO:0016616//oxidoreductase activity, acting on the CH-OH group of donors, NAD or NADP as acceptor	-
133	EJK66517.1	hypothetical protein THAOC_12562 [Thalassiosira oceanica]	44759.3	0.027	1	1	1.47	0.275	0.02957	EJK66517.1	MGRYSSTAVAALLSLPLARGFTASLDRKTNARHDLLLHSSAVEGSSVTSGSAPQATKRKLGLLTFDLDDTLYPIEPVLNEANTAFASAMSGFGYDGIEPDDIVQAGKEIRADVTTEVTGKTDSDPLRPATVNHKEIRLAAIRKEMEQFILQMKLKQTAEDWATEIESLTTPVRNSAEKWARSTVHSSVVQAVYQQWEMERHHSAERHLFPDAISALKEIKTDHPDVIVGAVTDGSANPMLMVFSLMPLFDFSISWEDDLDNIKEQFQELSTTESADDLSWIYRLAVEKGKEMSQISSEIKNKAGDDEDFEWCWIHVGDDLAFDVGGAKTMGAKTILVDLDQMYGQTARLRVDGTKPAWSTESDDQLTAHQRMAQNAIDKVDARINHLHQLPETINELLK…	100	0	gi|397621926|gb|EJK66517.1|	hypothetical protein THAOC_12562 [Thalassiosira oceanica]	-	-	-	-	-	-	-	-	-	-	-	-	-	-
134	EED86215.1	predicted protein [Thalassiosira pseudonana CCMP1335]	28615.8	0.027	1	1	1.52	0.222	0.01089	EED86215.1	MMLSSSRVLCHQGRILTRQSTRRITTSSKSTSLSIAIAAYTTATASILLYNLHSSHDVTNSSHNNYRAAQCSAPLGGEAVMLSPKTEPGTGILFPRLCNGMTLAGCGVRVKWGFVKVYAVGTYMDSLAMSVIKSQGEKEVKKALLDPNYPRTLRIVMNRDLSIDKYTSAIIEALEPRMKGQDLQSLEEFKKLNPPVDLIQGAEMEMTIRGDTLLYKNAVGGLGQIKSLVFTRAMCDVFYGEKAVSPTHLEDVLKGVKEL	100	6e-160	gi|224015653|ref|XP_002297476.1|	predicted protein [Thalassiosira pseudonana CCMP1335]	28.09	1e-08	sp|Q9C8L2|FAP3_ARATH	Fatty-acid-binding protein 3, chloroplastic OS=Arabidopsis thaliana GN=FAP3 PE=1 SV=1	-	-	-	-	-	-	-	GO:0009813//flavonoid biosynthetic process	GO:0045430//chalcone isomerase activity	-
135	XP_002289830.1	predicted protein, partial [Thalassiosira pseudonana CCMP1335]	36415.4	0.04	1	1	1.48	0.017	6.806e-06	XP_002289830.1	ILVSFLGTNYSGFQINSTQHTLQAAIELGLFKAGLISPSNFGWPSKYSWSNSARTDKGVHAAAQVVSMKGEMIFHSDTVSIEDQLNAMREKVNEHLPNDIRVLDIERVTRAFCARTNRDKVRYQYMVPSFMFSSREEICCAFGNIGETAIEDAKSRAKITPMEASNIVQDAVTDEVMQQARGKLIGYRVNDDQMERLRSGLKVFEGTHTFHNYTRRLGSDNASASRYIISFAPLDPIVVDGTEWIPVQIVGQSFLLNQIRKMISAAVDLARGTVTHEQIQQSLKKGSRMKVNVAPAQGLFLDRSYFELYNKQKSNALNHDPRP	100	0	gi|224000315|ref|XP_002289830.1|	predicted protein [Thalassiosira pseudonana CCMP1335]	32.48	7e-47	sp|Q6CC39|PUS1_YARLI	tRNA pseudouridine synthase 1 OS=Yarrowia lipolytica (strain CLIB 122 / E 150) GN=PUS1 PE=3 SV=1	79.7	2e-15	COG0101	tRNA U38,U39,U40 pseudouridine synthase TruA	J	Translation, ribosomal structure and biogenesis	K06173|1|3e-55|185|csl:COCSUDRAFT_6187| tRNA pseudouridine38-40 synthase [EC:5.4.99.12]	GO:0001522//pseudouridine synthesis;GO:0008033//tRNA processing	GO:0009982//pseudouridine synthase activity;GO:0003723//RNA binding	-
136	EJK72345.1	hypothetical protein THAOC_06134 [Thalassiosira oceanica]	28986.5	0.047	4	5	1.45	0.209	0.01476	EJK72345.1	MRRVTKLTSLCPRGRTYLRSTMAASSLLAACAVLAFLTPSTAFVPSSRGSQHAMAASAKSLLFASSGAADDTAKPVSLSPPSSQASRREILSKAASSALGLSSALVVLGPDSAGAFQPGPVTAQSAANKAAYEKSYQGVWADPNHPDGYRVIMASKTGGTTMTFSDGVAKDAPEGTEAKTYSGIPIGMKEGSSELTFDFSFKGGPKGVTATLSDDRQSITFPDGNTWTKNANKYDGIYKDPKYPNGYRVVRKLKSMNTITEVNDTGNPKDSSADLH	100	2e-158	gi|397636612|gb|EJK72345.1|	hypothetical protein THAOC_06134 [Thalassiosira oceanica]	-	-	-	-	-	-	-	-	-	-	-	-	-	-
137	XP_002294706.1	tryptophane synthase [Thalassiosira pseudonana CCMP1335]	73642	0.073	2	3	1.21	0.062	0.005149	XP_002294706.1	MTTSSSMARGHNGRIEQAFAEAKDRGEAAFVTFVTAGFPVKEDTPAILLAMQAGGASVIELGIPYTDPQADGTTIQQTNQVAIKAGTSDITQCLSMLESARSQGLTVPVVLMGYYNPFFQYGIESMCKKAKECGADGFIVVDLPPEEGADLAKACNKYGLSNIPLIAPTTTDERIGHLAKTASTFIYCVSTTGVTGARSELPSDLDDFIKRVRSKTDLPLAVGFGISNATMVQSVANIGDGVVVGSAILRAVQSAGDSTEERVEAVKKIVSELSAGCKQGGDDEVADQIAALNINKRFGKFGGQFIPETLSEAFREIEAEYEKVKNDPAFLAELDVYRRDFVGGPTPLHKAERLTEMCGGATIWLKREDLAHTGAHKINNAVGQALLAKRIGKPRIIAE…	100	0	gi|224012106|ref|XP_002294706.1|	tryptophane synthase [Thalassiosira pseudonana CCMP1335]	54.78	0	sp|P13228|TRP_NEUCR	Tryptophan synthase OS=Neurospora crassa (strain ATCC 24698 / 74-OR23-1A / CBS 708.71 / DSM 1257 / FGSC 987) GN=trp-3 PE=1 SV=1	536	0	COG0133	Tryptophan synthase beta chain	E	Amino acid transport and metabolism	K01696|1|2e-175|511|mpp:MICPUCDRAFT_33061| tryptophan synthase beta chain [EC:4.2.1.20]	GO:0000162//tryptophan biosynthetic process	GO:0004834//tryptophan synthase activity;GO:0030170//pyridoxal phosphate binding	-
138	EJK50234.1	hypothetical protein THAOC_30825 [Thalassiosira oceanica]	54094.1	0.099	1	1	1.72	0.493	0.03596	EJK50234.1	MMLSRAAASVTNSSSSVLRRQAAAGFSSGQPSGRWFTSTAPAMDQYDVVVVGGGPGGYVAAIKAGQMGLKTACVEMRGTLGGTCLNVGCIPSKALLTSSHHYHDAKHYFAEHGIVTGDVSMDVAKMMDAKAKTVQGLTGGIEHLLKKHKVDYFKGKGSLTGPNGVAVSLNDGGSESIDAKNIILATGSEVTPLPPVPVDNQGGKIVDSTGALDIAKIPSSMAVIGGGVIGLEMGSVWSRLGTDVTVIEFMDRLCPAMDQELTKKFQTTLKKQGFKFKLKTKVTKSEVQGDSVAITTEPSKGGDATTTNYDVVLVATGRRPYTDGLGLENLGIQTDKLGRIEVDSHFRTAVPSIYAIGDCIDGPMLAHKAEEEGIAAVETIAGFAGHVNYDAIPGVIYTF…	100	0	gi|397576396|gb|EJK50234.1|	hypothetical protein THAOC_30825 [Thalassiosira oceanica]	59.79	6e-180	sp|Q9M5K3|DLDH1_ARATH	Dihydrolipoyl dehydrogenase 1, mitochondrial OS=Arabidopsis thaliana GN=LPD1 PE=1 SV=2	576	0	COG1249	Pyruvate/2-oxoglutarate dehydrogenase complex, dihydrolipoamide dehydrogenase (E3) component or related enzyme	C	Energy production and conversion	K00382|1|0.0|551|ccp:CHC_T00010287001| dihydrolipoamide dehydrogenase [EC:1.8.1.4]	GO:0045454//cell redox homeostasis;GO:0055114//oxidation-reduction process	GO:0050660//flavin adenine dinucleotide binding;GO:0004148//dihydrolipoyl dehydrogenase activity	GO:0005737//cytoplasm
139	EED96519.1	serine threonine phosphatase [Thalassiosira pseudonana CCMP1335]	34464.8	0.057	1	1	1.31	0.02	5.031e-05	EED96519.1	MWLGKLTNGTPLTENEVQQLCNKARETLTLEANVQPVSAPVTVCGDIHGQWHDLMELYRIGGSAPDTNYLFMGDYVDRGYYSVETVSLLVCLKVRYPERVHILRGNHESRQITQVYGFYDECVRKYGSANVWKMFTDLFDYFPLTALVENQIFCLHGGLSPSVDALDHIRQLDRVQEVPHEGPMCDLLWSDPDDRSGWGISPRGAGFTFGQDVSEQFNARNGLTLVARAHQLVMEGYNWSHEKNVVTIFSAPNYCYRCGNQAAIMEVDERIEKTFLQFDPAPRRGEPHVNRRTPDYFL	100	0	gi|223994389|ref|XP_002286878.1|	serine threonine phosphatase [Thalassiosira pseudonana CCMP1335]	80.81	0	sp|P62716|PP2AB_RAT	Serine/threonine-protein phosphatase 2A catalytic subunit beta isoform OS=Rattus norvegicus GN=Ppp2cb PE=2 SV=1	148	4e-41	COG0639	Diadenosine tetraphosphatase ApaH/serine/threonine protein phosphatase, PP2A family	T	Signal transduction mechanisms	K04382|1|0.0|520|cme:CYME_CML332C| serine/threonine-protein phosphatase 2A catalytic subunit [EC:3.1.3.16]		GO:0004721//phosphoprotein phosphatase activity	GO:0005730//nucleolus;GO:0005737//cytoplasm;GO:0005886//plasma membrane
140	XP_002290720.1	probable bifunctional purine synthesis protein [Thalassiosira pseudonana CCMP1335]	67380.2	0.127	1	4	1.39	0.209	0.02302	XP_002290720.1	MAHILTAVSGTQADIVPITRALISVSDKANIVELCTYLASKNVELLSTGGTAKALRAAGLTVIDVSDYTGSPECLDGRVKTLHPKVHGGLLGVRGNEQHEKDMEENGIGKIDMTILNLYPFEATVAKGAEFEQCIENIDIGGPSMLRSTAKNHAFTTIVTSPDQYEEVKACIEENGGTTLALRKRYAARAFSLSAAYDSAIASWFTKELGEESPVVARVYKPQFQLKYGCNPHQKPAGILSLLNSDLPFTVLNGTPGYINLLDAANAWLLVKELREATGLAAASSFKHVSPAGAAVAVPLKDVECAAYEVTPDAAAKLTPSALAYLRARNADPMCSFGDYAAVSDVVDEDTALILKKEVSDGIVAPGYTPEALAILKAKKGGKFIILEAKADYSPDSVE…	100	0	gi|224002096|ref|XP_002290720.1|	probable bifunctional purine synthesis protein [Thalassiosira pseudonana CCMP1335]	49.26	0	sp|Q0VCK0|PUR9_BOVIN	Bifunctional purine biosynthesis protein PURH OS=Bos taurus GN=ATIC PE=2 SV=1	442	6e-150	COG0138	AICAR transformylase/IMP cyclohydrolase PurH	F	Nucleotide transport and metabolism	K00602|1|2e-113|355|cme:CYME_CML194C| phosphoribosylaminoimidazolecarboxamide formyltransferase / IMP cyclohydrolase [EC:2.1.2.3 3.5.4.10]	GO:0006164//purine nucleotide biosynthetic process	GO:0004643//phosphoribosylaminoimidazolecarboxamide formyltransferase activity;GO:0003937//IMP cyclohydrolase activity	-
141	EJK59365.1	hypothetical protein THAOC_20426 [Thalassiosira oceanica]	39223.6	0.036	4	16	1.23	0.093	0.01153	EJK59365.1	MVGGADVHSDEPDNRGINDGSGLIEVPAGINEGRKCVSRDESLTEILITRGLSEANLISSIVSLGEASAQIAAILENYVKHEYAGTQNSSGDDQLKLDIDCDNAVFHAIRGSGTFVTAASEETPVETDVSSPSMKDEEFYSVGFDPLDGSSIIDANFSVGSIFGIWPGKGLLGRRGREQVASVVSLYGPRTTLMIALPAKSRDDDKGDLAFEVTLVKDRSLWELSRGDVKLKPSKKVFAPGNLRAVNDNEKYDSLVKHWIADRYTLRYSGGMVPDVYHMFAKSGGVFSNVSSEKARAKLRLLYEVAAIGLMVECADGATTHEFEDISVLDVEIDDLDKRLGVCFGSKDEVAKYRKFMFE	100	0	gi|397606576|gb|EJK59365.1|	hypothetical protein THAOC_20426 [Thalassiosira oceanica]	42.5	1e-71	sp|P46285|S17P_WHEAT	Sedoheptulose-1,7-bisphosphatase, chloroplastic OS=Triticum aestivum PE=2 SV=1	154	3e-42	COG0158	Fructose-1,6-bisphosphatase	G	Carbohydrate transport and metabolism	K01100|1|5e-74|238|nnu:104597004| sedoheptulose-bisphosphatase [EC:3.1.3.37]	GO:0016051//carbohydrate biosynthetic process	GO:0042578//phosphoric ester hydrolase activity	GO:0009536//plastid
142	EED93403.1	alpha enolase [Thalassiosira pseudonana CCMP1335]	46955.5	0.234	1	2	1.89	0.245	0.002391	EED93403.1	MSAITGIHGREIIDSRGNPTVEVDITTAQGTFTASVPSGASTGAYEAVELRDGGSRYLGKGVSQAVNNVNTVLADAVKGIDVADQRAVDDAMLKADGTPNKGNLGANAILGISLAASKAGAAAKGVPLWKHYADIAGNPTPDVLPVPCFNVINGGEHAGNKLAFQEFFVIPTGAETFSESMQIGCEVFHNLKKVIKAKFGGDATLIGDEGGFAPPCDVESGLEMIMEATEAAGYLDKVSVGLDVASSEFKVPGKNQYDLDFKTKGADKDSSLLLSGDELIAFYKQLIDKYPIVTIEDPFDQDDWDNWTKICKEVGKDVQIVGDDLTVTNPVKIQEAINLGSANCLLLKVNQIGSISESIDAVKLSKQNGWGVMCSHRSGETEDFYIADLAVGLCTGEIK…	100	0	gi|224000387|ref|XP_002289866.1|	alpha enolase [Thalassiosira pseudonana CCMP1335]	60.54	0	sp|O57391|ENOG_CHICK	Gamma-enolase OS=Gallus gallus GN=ENO2 PE=2 SV=1	451	2e-155	COG0148	Enolase	G	Carbohydrate transport and metabolism	K01689|1|0.0|526|crb:CARUB_v10017251mg| enolase [EC:4.2.1.11]	GO:0006096//glycolytic process	GO:0004634//phosphopyruvate hydratase activity;GO:0000287//magnesium ion binding	GO:0009986//cell surface;GO:0000015//phosphopyruvate hydratase complex;GO:0016020//membrane
143	EED87645.1	predicted protein [Thalassiosira pseudonana CCMP1335]	27947.7	0.04	1	1	1.26	0.05	0.001301	EED87645.1	MKQEEEEGEVDVNLQEYKKRRDEARRSPYPSVIVEVQSTPPPDFGSRSPLAQDQQQQQEAPQMKIDADEGVTSEDVKRLEALFGMSAASKKADDAFYDALGDAFGKKQVEAQTPLSMAQHWVLANDPQFDEKTSTFTTSDTRHVDAAFEYCFNTLAMINDPSTPEPKRGQKSYIVLPNFLPTSATSFDRFAGQVSNIIRHMPNVSEKVLISTYQLEHCDGGTRSPVPIFVVTWKQMLWKVESNQLSGI	100	0	gi|224012425|ref|XP_002294865.1|	predicted protein [Thalassiosira pseudonana CCMP1335]	-	-	-	-	-	-	-	-	-	-	-	-	-	-
144	EJK53428.1	hypothetical protein THAOC_27143 [Thalassiosira oceanica]	33381.8	0.026	1	17	1.67	0.431	0.03431	EJK53428.1	MRATGAAFHLPRNLAVSRELEVWDHLEEICSSTNHNDWSFLSSIQGSVIGASSCVLLMEYAESHEGEGARNLKEAWRNTDDDLESSLVERSVWCDASSIRARQSTPPTIQSQLDSLLDLKILSYSGGGGGKKEEEDETTRTDFSESPASTSGTRTVGRGVPESMLVFSKAGGRVMTRSGGNTEVDPVVDRRYAFVAGAMRRDLLLLAWRRAHELTESSRASPSDTSGRRRNSPGSVVLAGSDLAVAAAGFVGSTAISANGGSAGRGRRARAGLRQAADGGFPATTGRLRLGILRPSILRRRFWTPPRID	100	8e-180	gi|397585892|gb|EJK53428.1|	hypothetical protein THAOC_27143 [Thalassiosira oceanica]	-	-	-	-	-	-	-	-	-	-	-	-	-	-
145	EED95846.1	glyceraldehyde-3-phosphate dehydrogenase precursor, partial [Thalassiosira pseudonana CCMP1335]	39942.8	0.349	1	1	1.59	0.306	0.01913	EED95846.1	KFIAALSLVAGASAYAPSAFSGSSLRATSNGSSMSMATGMGVNGFGRIGRLVTRIMMEDDDIKLSAINAGSATPDYMAYQYKYDTIHGIAKGTVDIDGDFLVLNGEKIQTSRCRDPKEVGWGALGADYVCESTGVFLTKEKAQAIIDGGAKKVIYSAPAKDDSQTIVMGVNQGEYDGSEDFISCASCTTNGLAPMVKAIHDEFDIQEALMTTVHAMTATQAVVDSSSRKDWRGGRAASGNIIPSSTGAAKAVTKVIPSLQGKLTGMAFRVPTIDVSVVDLTCKLGKATTYEEICAVIKAKSEGEMKGILGYCDEPLVSTDFESDSRSSIFDAGAGIMLNPTFVKLVAWYDNEWGYSGRVVDLMKHVAAVDAKIAA	100	0	gi|223993043|ref|XP_002286205.1|	glyceraldehyde-3-phosphate dehydrogenase precursor [Thalassiosira pseudonana CCMP1335]	71.63	3e-179	sp|O09452|G3PA_GUITH	Glyceraldehyde-3-phosphate dehydrogenase, chloroplastic OS=Guillardia theta GN=GAPC1 PE=2 SV=1	413	5e-143	COG0057	Glyceraldehyde-3-phosphate dehydrogenase/erythrose-4-phosphate dehydrogenase	G	Carbohydrate transport and metabolism	K00134|1|2e-144|416|sita:101785151| glyceraldehyde 3-phosphate dehydrogenase [EC:1.2.1.12]	GO:0019253//reductive pentose-phosphate cycle;GO:0006006//glucose metabolic process;GO:0055114//oxidation-reduction process	GO:0051287//NAD binding;GO:0050661//NADP binding;GO:0004365//glyceraldehyde-3-phosphate dehydrogenase (NAD+) (phosphorylating) activity;GO:0043891//glyceraldehyde-3-phosphate dehydrogenase (NAD(P)+) (phosphorylating) activity;GO:0047100//glyceraldehyde-3-phosphate dehydrogenase (NADP+) (phosphorylating) activity	GO:0009507//chloroplast
146	XP_002286647.1	predicted protein [Thalassiosira pseudonana CCMP1335]	36059.4	0.034	2	2	1.55	0.375	0.0383	XP_002286647.1	MAGLKAVNTKHTINDVGDDEGVNTINNNNSSSSRRKFMSSVALSSLAILPTPSFADEATISTPPVQVVLTGDAKKRFNEGRALEAQGNILAAQRLYTKVTKISPTFIYGWSSLGNTLVAQGELNPAEETYTKAINLCEESLKGGDSFGTKRCDDLYLLLLNRGSVRLNNGMTKEALVDLQKSDTLRARPDAIILQNLARAQEVNAQFYQSDRSYDTAISMTANEVNPFWLRSSMVKYQLDNVTGAMDLMRRVENRFPEAPEVRAAYAVLLLGRGDEDAARKKFLEIPDRQRKKYADRDYLDKVISWPPKMKDGVGYLSKAVGDSE	100	0	gi|223993927|ref|XP_002286647.1|	predicted protein [Thalassiosira pseudonana CCMP1335]	-	-	-	-	70.9	2e-12	COG0457	Tetratricopeptide (TPR) repeat	R	General function prediction only	K09667|1|2e-08|59.7|obr:102717126| protein O-GlcNAc transferase [EC:2.4.1.255]	-	-	-
147	EJK47511.1	hypothetical protein THAOC_33758, partial [Thalassiosira oceanica]	13644.5	0.197	1	3	1.92	0.183	0.0008718	EJK47511.1	NLDRSDFKGLNLKGVAFQQSIVRDTDFRGTNLFGASFFDATLDGSDFEGADMTLCNVENAIVKEMYVSGATLFEGVKSIENSDWSDTQLRKDQQKYLCEHPTAKGTNPVTGVDTRESLMCLD	100	5e-87	gi|397570889|gb|EJK47511.1|	hypothetical protein THAOC_33758, partial [Thalassiosira oceanica]	41.54	5e-20	sp|O22160|TL15A_ARATH	Thylakoid lumenal 15 kDa protein 1, chloroplastic OS=Arabidopsis thaliana GN=At2g44920 PE=1 SV=2	85.9	1e-20	COG1357	Uncharacterized protein YjbI, contains pentapeptide repeats	S	Function unknown	-	-	-	-
148	XP_002296054.1	cytochrome C peroxidase, partial [Thalassiosira pseudonana CCMP1335]	29083.5	0.071	5	8	1.43	0.2	0.0153	XP_002296054.1	KAVASDIASIVKDDPDKGPTLVRLAWHSSGTYDKMSKDGGSGGGTIRFREELAHGGNAGLGSTAVVWLEDVKKKYGDSLSYADLYTLGGVVAIKELGGPTIKWSSGRVDALDPSAVTPDGRLPNADSGPAGSDPSDAAHLRTIFNRMGFNDQEIVALSGAHALGRCRPSASGYDGPWTPLPTTFNNLYFSLLNQIKWAKRDWSGPFQYEDDGKKLMMLPTDLVLIQDAEFKKYVDLYAGDQNKFFSDFSKAFNKLEELGTTGLVATQWS	100	0	gi|224004806|ref|XP_002296054.1|	cytochrome C peroxidase [Thalassiosira pseudonana CCMP1335]	56.22	7e-86	sp|P0CP54|CCPR_CRYNJ	Cytochrome c peroxidase, mitochondrial OS=Cryptococcus neoformans var. neoformans serotype D (strain JEC21 / ATCC MYA-565) GN=CCP1 PE=3 SV=1	115	3e-27	COG0376	Catalase (peroxidase I)	P	Inorganic ion transport and metabolism	K00428|1|1e-107|319|mis:MICPUN_109115| cytochrome c peroxidase [EC:1.11.1.5]	GO:0055114//oxidation-reduction process;GO:0006979//response to oxidative stress	GO:0020037//heme binding;GO:0004130//cytochrome-c peroxidase activity	-
149	XP_002295597.1	1-deoxy-D-xylulose 5-phosphate reductoisomerase [Thalassiosira pseudonana CCMP1335]	51872.5	0.147	2	36	1.21	0.113	0.02902	XP_002295597.1	MKLSLAFSTILLSQSSAFTTLTSTKSTTTTTSSSLNVFSPPGSAGTGAGWIDPSAPVNTPESLQKTLSESLKGSTFQKRISILGSTGSIGTQTLDIVDACPDNFVVDALSAGNNAELMCEQVLKYKPKVASLGTPEAAKKLKELLVKAGCTDMPEIVHGAEGIVEAATVSTADTVVTGIVGAAGLLPTIEAIKLGKDIALANKETLISGGPVINPLVEKHGINMLPADSEHSAIFQCLQGVPPGGLRRVILTASGGAFRDLSKDELFEMCERDPRAVQKKATTHPNWDMGAKITLDSATMMNKGLEVIEAHYLFGASYDDIDIVIHPQSIVHSMVETQDTSCIAQLGWADMRLPIVYSVSWPHRLKMPYKPLNLAEIGSLTFKAPDVEKYPCIRLAYEA…	100	0	gi|224011645|ref|XP_002295597.1|	1-deoxy-D-xylulose 5-phosphate reductoisomerase [Thalassiosira pseudonana CCMP1335]	56.79	2e-148	sp|Q3MDL2|DXR_ANAVT	1-deoxy-D-xylulose 5-phosphate reductoisomerase OS=Anabaena variabilis (strain ATCC 29413 / PCC 7937) GN=dxr PE=3 SV=1	474	1e-164	COG0743	1-deoxy-D-xylulose 5-phosphate reductoisomerase	I	Lipid transport and metabolism	K00099|1|2e-156|455|mpp:MICPUCDRAFT_47613| 1-deoxy-D-xylulose-5-phosphate reductoisomerase [EC:1.1.1.267]	GO:0055114//oxidation-reduction process;GO:0016114//terpenoid biosynthetic process	GO:0046872//metal ion binding;GO:0030604//1-deoxy-D-xylulose-5-phosphate reductoisomerase activity;GO:0070402//NADPH binding;GO:0016853//isomerase activity	-
150	EJK66007.1	hypothetical protein THAOC_13085 [Thalassiosira oceanica]	39860.5	0.405	1	1	1.41	0.085	0.001429	EJK66007.1	MKFATAALLVSSASAYSFSGTSLKAASNGSSMSMATGMGVNGFGRIGRLVTRIMMEDDDCKLSAINAGSATPDYMAYQYKYDTIHGIAKGTVEVDGDFLVLNGEKIQTSRCRDPKEVGWGALGADYVCESTGVFLTKESAQSILDGGAKKVIYSAPAKDDSQTIVMGVNAEEYDGSENFISCASCTTNGLAPMVKAIHDEFDIQEALMTTVHAMTATQAVVDSSSRKDWRGGRAASGNIIPSSTGAAKAVTKVIPSLQGKLTGMAFRVPTIDVSVVDLTCKLGKETTYEEICAVIKAKSEGEMKGVLGYCDEPLVSTDFESDSRSSIFDAGAGIMLNPSFVKLVAWYDNEWGYSGRVVDLMKHVAAVDAKVAA	100	0	gi|397620938|gb|EJK66007.1|	hypothetical protein THAOC_13085 [Thalassiosira oceanica]	71.47	3e-175	sp|O09452|G3PA_GUITH	Glyceraldehyde-3-phosphate dehydrogenase, chloroplastic OS=Guillardia theta GN=GAPC1 PE=2 SV=1	407	7e-141	COG0057	Glyceraldehyde-3-phosphate dehydrogenase/erythrose-4-phosphate dehydrogenase	G	Carbohydrate transport and metabolism	K00134|1|2e-143|413|sita:101785151| glyceraldehyde 3-phosphate dehydrogenase [EC:1.2.1.12]	GO:0019253//reductive pentose-phosphate cycle;GO:0006006//glucose metabolic process;GO:0055114//oxidation-reduction process	GO:0051287//NAD binding;GO:0050661//NADP binding;GO:0004365//glyceraldehyde-3-phosphate dehydrogenase (NAD+) (phosphorylating) activity;GO:0043891//glyceraldehyde-3-phosphate dehydrogenase (NAD(P)+) (phosphorylating) activity;GO:0047100//glyceraldehyde-3-phosphate dehydrogenase (NADP+) (phosphorylating) activity	GO:0009507//chloroplast
151	XP_002286017.1	predicted protein [Thalassiosira pseudonana CCMP1335]	49773	0.025	1	2	1.3	0.192	0.04117	XP_002286017.1	MRGGGASLRFTTVFYCCRFDSPAKSSFSRVTFVFHHITSLHPPSPSTQPLKRNSKMAGYTMTRSSCLFIWSLVSVFQNTDGFGLAGTSRALTGRFHHQRHRYTQSTLHSSASGDESESAPTTSIDATTKVEIRNIANHIASQHLDSLLSKSDALAISNELFFSDSQTNSSPIFNDNSYEQYVKYWNKVEKRLREETHRSPADLLGKELTSRILSSIRGDDPKDKRRGGGGRSSGSSYDAQTVRTFLESDAINSLFTKLLYDAIFEFTTKFDILGNAISNLPLLGPVRNQVLKESKKNMDRTLGPLLQRFLSGYTRVAIRQAVDFVVSDENASAFGKANAKLVGYLLEGRSVAEWVPETKQLEEWREESWSYLVGLEKGGGDGDGGKVKDDQKKVVEQSI…	100	0	gi|223992667|ref|XP_002286017.1|	predicted protein [Thalassiosira pseudonana CCMP1335]	-	-	-	-	-	-	-	-	-	-	-	-	-	-
152	ACI64698.1	UDP-glucose 4-epimerase; uridine diphosphoglucose epimerase; uridine diphosphate galactose 4-epimerase, partial [Thalassiosira pseudonana CCMP1335]	40915.2	0.022	4	5	1.57	0.161	0.003185	ACI64698.1	RTVLVTGGTGYIGSHTCLELLSTNRYRVVVIDNLENSSEESLNRVKQLLADAATSECQQVAENINDRLHFRNCDIRDSDGLQSILQEFPTISSCVHFAGLKAVGESVSKPLEYYNVNVGGTTTLLQQLQQHKVKHFVFSSSATVYGEPEMLPLKEHARLTATNPYGRTKLFIEEILRDLYASCSEEWNILILRYFNPIGAHESGRMGEDPQGIPNNLMPFIAQVCVGRREKLSVFGDDYDTPDGTGVRDYIHVVDLAKGHVAALDKLYSDDNVGCEAVNLGTGKGVSVLELVDGMGAATGKPVPYEMAPRRPGDVAQLYADPEKARTMFGWSASLGTKEMCEDTWRWQSTNPMGYREVVEEIVSEN	100	0	gi|224004660|ref|XP_002295981.1|	UDP-glucose 4-epimerase ; uridine diphosphoglucose epimerase; uridine diphosphate galactose 4-epimerase [Thalassiosira pseudonana CCMP1335]	57.06	7e-136	sp|Q9SN58|UGE5_ARATH	UDP-glucose 4-epimerase 5 OS=Arabidopsis thaliana GN=UGE5 PE=1 SV=3	413	5e-143	COG1087	UDP-glucose 4-epimerase	M	Cell wall/membrane/envelope biogenesis	K01784|1|4e-151|433|cme:CYME_CMA041C| UDP-glucose 4-epimerase [EC:5.1.3.2]	GO:0006950//response to stress;GO:0044237//cellular metabolic process;GO:0006012//galactose metabolic process	GO:0046983//protein dimerization activity;GO:0003978//UDP-glucose 4-epimerase activity;GO:0050662//coenzyme binding;GO:0000166//nucleotide binding	-
153	EED93255.1	probable SOLUBLE pyridine nucleotide transhydrogenase [Thalassiosira pseudonana CCMP1335]	50421.7	0.082	1	2	1.46	0.291	0.038	EED93255.1	MIGTCSWNCVLNAEVVKLLEYVFSSRIFFCTHQRNHTSVWNEIVNSCLELASSNARDTIRQLEYAGVTYVQGAAAFADSRGSSSLFITSPDMSVSTVSSDKILLATGSTPFRPGGIPFDGKRVFDSDSINTLSRLPKSVAITGSGIIAIEFAKIFKNLGSDVTLIIRDNIPRNALMKIGLDKDIAATLVADLVRSGIKIERGAQVKKFTVPRDNDKAPMVLELEAKGGGERPSGEITTLKCDIYLAAVGRKPNTMNLNLAAAGIKTDQYGGIAVDSDLRSTATGGNVYAAGDVLGRPFLASTGMAQGFAAIRRMFRDDISLAANPFAFPIGVWSSPEASYYGLSTQQCKEMGIDAGEGVALYAECLRGLVFSPNGLLKLVFDKSNGRIMGVHICGDDAC…	100	0	gi|224000091|ref|XP_002289718.1|	probable SOLUBLE pyridine nucleotide transhydrogenase [Thalassiosira pseudonana CCMP1335]	32	2e-54	sp|Q48A14|STHA_COLP3	Soluble pyridine nucleotide transhydrogenase OS=Colwellia psychrerythraea (strain 34H / ATCC BAA-681) GN=sthA PE=3 SV=1	208	4e-60	COG1249	Pyruvate/2-oxoglutarate dehydrogenase complex, dihydrolipoamide dehydrogenase (E3) component or related enzyme	C	Energy production and conversion	K00382|1|7e-43|163|vcn:VOLCADRAFT_83716| dihydrolipoamide dehydrogenase [EC:1.8.1.4]	GO:0045454//cell redox homeostasis;GO:0055114//oxidation-reduction process	GO:0050660//flavin adenine dinucleotide binding;GO:0003957//NAD(P)+ transhydrogenase (B-specific) activity;GO:0016668//oxidoreductase activity, acting on a sulfur group of donors, NAD(P) as acceptor	GO:0005737//cytoplasm
154	EED91609.1	hypothetical protein THAPSDRAFT_269113 [Thalassiosira pseudonana CCMP1335]	59425.3	0.019	1	1	1.24	0.033	0.0005631	EED91609.1	MESEEAKSLRAEATRIEGKLEDARNKLTLGATIDGKFEEMSSVGLRNKVRVDPDEKVRKACFEGLSKIGDFVTENGFVELVKVRNRMAKALGFLDFYDYKVTNAEGFGKVALFEILDTLEKGTRPIMESARKQFADEKGGASSLEPWNLSFMMAGETTRKMDPYFPFEKSVEQWGRSFAAMNISYRGATMDLDLLDRKGKYSNGFCHWPQPAWAKPDGSWQPSVTHFTSLADPSAVGSGHTGLTTLMHEAGHAAHFANVDMPSPLFSQERSPTSVAYAELQSMFLDSLVGDADWMAKYAISREGDTIPWDLVAEKIQTTHPYKVFALRGMIAVPYFEKALYEMAEEDVTAENIKALADKVEKDIQGGLSPRPLLSVPHILSDEASCYYHGYVLAEMGVH…	100	0	gi|224003661|ref|XP_002291502.1|	hypothetical protein THAPSDRAFT_269113 [Thalassiosira pseudonana CCMP1335]	23.6	2e-09	sp|Q1JPJ8|THOP1_BOVIN	Thimet oligopeptidase OS=Bos taurus GN=THOP1 PE=2 SV=3	422	3e-140	COG1164	Oligoendopeptidase F	E	Amino acid transport and metabolism	K01410|1|4e-06|53.5|brp:103857178| mitochondrial intermediate peptidase [EC:3.4.24.59]	GO:0006508//proteolysis	GO:0046872//metal ion binding;GO:0004222//metalloendopeptidase activity	-
155	EJK58002.1	hypothetical protein THAOC_21902 [Thalassiosira oceanica]	61377.7	0.038	1	1	1.43	0.267	0.03449	EJK58002.1	MVSPNEHLERIFASVSIVSIHPPVSLKQIRQVSSPPPVPFIAYRLYPIMLKSLVILSVCASSALGFVAPGSKETARQSTSAGVVSLSGVSRSTSQLEAHKLVLIRHGESEWNDLNIFTGWADAALNEKGLREAAQGGQLLKDAGRHQGWRWTQRAQACNQNIVDSTGGDGFDVSPDSESSDVPAGAIARESRYESLPTLRRVRRQPCGVQRELCNSLDCRLHTMIHSFADNQRHYGGLQGLNKQETVDKHGKDQVLVWRRSYDIPPPACDESSEYYPGNDPRYANVDKEDLPFTESLKITGERFMPLWENEIAPKILAGEKILIAAHGNTLRALVKHLDNISEEEICGLNIPTGVPLVYELDDDLNVIPNENGIGSLQGMYLGNQEDIRARIEGVANQT…	100	0	gi|397601814|gb|EJK58002.1|	hypothetical protein THAOC_21902 [Thalassiosira oceanica]	44.82	2e-78	sp|B4SEI0|GPMA_PELPB	2,3-bisphosphoglycerate-dependent phosphoglycerate mutase OS=Pelodictyon phaeoclathratiforme (strain DSM 5477 / BU-1) GN=gpmA PE=3 SV=1	271	4e-86	COG0588	Phosphoglycerate mutase (BPG-dependent)	G	Carbohydrate transport and metabolism	K01834|1|5e-44|168|vcn:VOLCADRAFT_96867| 2,3-bisphosphoglycerate-dependent phosphoglycerate mutase [EC:5.4.2.11]		GO:0016853//isomerase activity	-
156	EJK77073.1	hypothetical protein THAOC_01109 [Thalassiosira oceanica]	80279.9	0.016	1	1	1.61	0.197	0.00456	EJK77073.1	MASKWQQKKNRQAEAALERELQAGGNSADKVKDQCSDAALGKGEEQHYEKKLTKEEKKALAKAKRDAKKKEKGGKKSGKSKKVEEEKKDDDAAGALGKLSISGVDPNSEEGKREAALEELSRQEIVVTYEQKKGQLHANTRDINVSGVSVAFHGKLLVEETDVVINYGNRYGFIGPNGSGKSTVMKAIAARSIPIPSALDIYFLDSEYPARDDITALEAVMQSNDEVALLEGKALKLNDAMAEADEDEQAEIQEALEDIYDRLDQLDAATAESRATTILYGLGFTKAMMQYKTCEFSGGWRMRVSLARALFIEPEFLLLDEPTNHLDMDAVLWLEDFLSGWKKILFFVCHSQDFMNSVCTHIVRLDMTYKKLRYYSGNYDTYVQTRRDQDMVQIRQYEA…	100	0	gi|397645990|gb|EJK77073.1|	hypothetical protein THAOC_01109 [Thalassiosira oceanica]	48.29	9e-170	sp|Q9FJH6|AB1F_ARATH	ABC transporter F family member 1 OS=Arabidopsis thaliana GN=ABCF1 PE=2 SV=1	332	4e-103	COG0488	ATPase components of ABC transporters with duplicated ATPase domains	R	General function prediction only	K06185|1|6e-180|529|cvr:CHLNCDRAFT_32698| ATP-binding cassette, subfamily F, member 2	GO:0006200//ATP catabolic process	GO:0016887//ATPase activity;GO:0005524//ATP binding	-
157	XP_002291234.1	predicted protein [Thalassiosira pseudonana CCMP1335]	35110.3	0.055	1	1	1.51	0.173	0.006024	XP_002291234.1	MISILRSTSVASSAYLARRAAIVRSSTAAQQRSESTLVVAEPTTDSSLAPSTLAAITAASKLHSGPISLLTFTPASAVPSSVTSVIEANTTSGVGNSNKLAETVTNAVVAANEKHGYSHIVAAGTKFGANYLGRAGAQLGVSPVSDVVEVLSGDTFVRPLYAGNALAKVISKDSPLTLISIRPTAFEKAEATVESANTESLDVPANELTEWLLESVSKSERPDLGSASVVVSGGRGMKNGENFALLEALADKLKGAVGASRAAVDAGFVPNDLQVGQTGKVVAPDLYIAVGISGAIQHLSGMKDSKTIVAINKDGDAPIFQVADYGLVADLFDAVPELTEKLQ	100	0	gi|224003125|ref|XP_002291234.1|	predicted protein [Thalassiosira pseudonana CCMP1335]	53.27	3e-93	sp|Q8HXY0|ETFA_MACFA	Electron transfer flavoprotein subunit alpha, mitochondrial OS=Macaca fascicularis GN=ETFA PE=2 SV=1	301	5e-100	COG2025	Electron transfer flavoprotein, alpha subunit	C	Energy production and conversion	K03522|1|7e-92|281|gsl:Gasu_24520| electron transfer flavoprotein alpha subunit		GO:0050660//flavin adenine dinucleotide binding;GO:0009055//electron carrier activity	-
158	EJK50284.1	hypothetical protein THAOC_30772 [Thalassiosira oceanica]	23850.9	0.054	1	1	1.47	0.303	0.03709	EJK50284.1	MEMLAKADAVCFDVDSTVIDEEGIDVLADTLGKGPEVAAWTAKAMGGNVKFEDALAARLEIITPSRKQISDCLEQHPLRLSPGVDTLVTKLQQRGTDVYLVSGGFRLMIEPVAEELGVNVKNIYANTILFDDDGEYAGFDSDEPTSADQGKPKALGQIKEAGGYETMIMVGDGATDAQAKPPADAFIGYGGVVRRDAVAAKADWFVTDFETMIDIASKEKSK	100	2e-151	gi|397576487|gb|EJK50284.1|	hypothetical protein THAOC_30772 [Thalassiosira oceanica]	53.7	4e-71	sp|O82796|SERC_ARATH	Phosphoserine phosphatase, chloroplastic OS=Arabidopsis thaliana GN=PSP PE=1 SV=2	140	1e-39	COG0560	Phosphoserine phosphatase	E	Amino acid transport and metabolism	K01079|1|8e-79|241|sita:101786288| phosphoserine phosphatase [EC:3.1.3.3]	GO:0016311//dephosphorylation;GO:0006564//L-serine biosynthetic process	GO:0004647//phosphoserine phosphatase activity	-
159	EJK74888.1	hypothetical protein THAOC_03405 [Thalassiosira oceanica]	36180.6	0.102	1	2	1.1	0.232	0.5196	1.36	1.163|1.514|1.160|1.618	0.237	4	0.04158	0.79	0.979|0.891|0.667|0.634	0.169	4	0.1017	1.09	1.031|1.409|0.803|1.134	0.251	4	0.5906	0.75	0.613|0.626|0.913|0.829	0.149	4	0.0538	EJK74888.1	MFVKNLAARSINAAARRAYSASAPSSAKVAVLGAAGGIGQPLSLLCKLSPEVSELSCYDIVGTPGVAADLSHIPTKSSTTGSLPSPVSWPLRGNGGLEETLSGADVVVIPAGVPRKPGMTRDDLFNTNASIVKTLVEGCAEFCPEAVIAIISNPVNSTVPIAAEVLKKAGKYNPKKLVGVTTLDVCRANTFVANSQGLDPKDVDVTVIGGHAGITILPLFSRVGAKFSDEELEAITVRTQFGGDEVVAAKAGAGSATLSMAYAGYIFTENVLKAMRGEGVVQCAFVESDLTDAEFFASPVRFGPNGVEEILPLGDLSPYEQQWFDKMMPELKKQIAKGKDFVSA	100	0	gi|397641860|gb|EJK74888.1|	hypothetical protein THAOC_03405 [Thalassiosira oceanica]	58.86	5e-122	sp|Q42972|MDHG_ORYSJ	Malate dehydrogenase, glyoxysomal OS=Oryza sativa subsp. japonica GN=Os12g0632700 PE=1 SV=3	100	0	tr|K0T7V8|K0T7V8_THAOC	Malate dehydrogenase OS=Thalassiosira oceanica GN=THAOC_03405 PE=3 SV=1	gi|197287212|ref|YP_002153084.1|	329	7e-111	COG0039	Malate/lactate dehydrogenase	C
160	EED87245.1	probable glutathione reductase-like protein [Thalassiosira pseudonana CCMP1335]	60164	0.036	1	1	1.43	0.042	0.000157	EED87245.1	MHHHHQRHDYSTAAYVSLSGRMDDLQRIRPAFLRGGASFTNATSRSSTTTADDDSTNKEYDFDLLVIGAGSGGIASARRAASYGARVGVVEVGALGGTCVNVGCVPKKIMYNAATISETLHDMHHYGFSGYDSGAISFDWGYIKRSRDVYIQRLNGIYDCNMINSNVTRLIGMASLTKSESGGVDVMVSRTSNKPSERYRAKHILLATGGYPTMPSGTDGSVSKYAISSDGFFELDTLPRKAVVVGAGYIAVELAGILQALGSETSLVVRKNSALRQFDEMLSKTLEEEMERQGIDIYRNTEGVSHISLNEANGTKTVVLNNGEVIDNVDVVILAAGRSPSVEKLNLEETGVVQKKGGYVAVNEYSETNVPGLYAVGDVCGNVELTPMAIAAGRRLADR…	100	0	gi|224013770|ref|XP_002296549.1|	probable glutathione reductase-like protein [Thalassiosira pseudonana CCMP1335]	48.97	5e-142	sp|Q873E8|GSHR_NEUCR	Glutathione reductase OS=Neurospora crassa (strain ATCC 24698 / 74-OR23-1A / CBS 708.71 / DSM 1257 / FGSC 987) GN=gtr-1 PE=3 SV=1	452	7e-154	COG1249	Pyruvate/2-oxoglutarate dehydrogenase complex, dihydrolipoamide dehydrogenase (E3) component or related enzyme	C	Energy production and conversion	K00383|1|2e-93|299|gsl:Gasu_10030| glutathione reductase (NADPH) [EC:1.8.1.7]	GO:0045454//cell redox homeostasis;GO:0006749//glutathione metabolic process;GO:0055114//oxidation-reduction process	GO:0050660//flavin adenine dinucleotide binding;GO:0050661//NADP binding;GO:0004362//glutathione-disulfide reductase activity	GO:0005737//cytoplasm
161	EJK56204.1	hypothetical protein THAOC_23957, partial [Thalassiosira oceanica]	12983.6	0.076	1	1	1.5	0.092	0.0009105	EJK56204.1	MSTLVGILISASCLAVLSTALATADSYRSYLVTGANKGQGYALCQRILEEHTDTRVFLCSRDLQRGEEARSSLVEECGDEGRVQLVQLDVTDSASVEACADLVRKRLEGRKLTGIVSN	100	4e-79	gi|397594312|gb|EJK56204.1|	hypothetical protein THAOC_23957, partial [Thalassiosira oceanica]	42.71	2e-11	sp|Q6WAU1|IPIPR_MENPI	(-)-isopiperitenone reductase OS=Mentha piperita PE=1 SV=1	63.9	1e-11	COG1028	NAD(P)-dependent dehydrogenase, short-chain alcohol dehydrogenase family	IQR	Lipid transport and metabolism;Secondary metabolites biosynthesis, transport and catabolism;General function prediction only	K00079|1|1e-11|63.2|gsl:Gasu_14740| carbonyl reductase 1 [EC:1.1.1.184 1.1.1.189 1.1.1.197]!K15095|2|1e-11|63.2|egr:104442079| (+)-neomenthol dehydrogenase [EC:1.1.1.208]	GO:0031525//menthol biosynthetic process	GO:0070402//NADPH binding;GO:0052581//(-)-isopiperitenone reductase activity	-
162	EED90014.1	predicted protein [Thalassiosira pseudonana CCMP1335]	54381.8	0.021	3	7	1.48	0.204	0.01135	EED90014.1	MSPSGYIQSRELAHSSSDQYFTTLVDGRPYLPNLTVDATDDASIAKVAMVTIILSAYISISKVNEDVCDKLYFEAEKGATFRILNVESIDWDEIIQAPMQQLTCVKVTGGITNALFRVSGFQQIIPSISSALSKILSFTVGTDTPSSSSIDIHKLIIFDSILIRIFGAEGMINRDIETSTYAALCNADIAHQYLGRFSNGRIEGWLEGFQPLTFIDLNDECTSLEIAKEMARLHCLFEVPEGELKDHHGMEVGLWDQLSGWMEQALGYEEFRTEGDTERVKKLELDKIGKEVKGIIESFTAPPEDEKNDKSKSGIVFCHNDLLAANIMRDPATNKIQLIDFEYGGTNYAAFDMANHFNEHAGGTSVEENGHPDYTLFPELERQQKFCLEYVKTLKRLES…	100	0	gi|224007717|ref|XP_002292818.1|	predicted protein [Thalassiosira pseudonana CCMP1335]	28.38	1e-37	sp|Q869T9|EKIA_DICDI	Probable ethanolamine kinase A OS=Dictyostelium discoideum GN=etnkA PE=3 SV=1	-	-	-	-	-	-	K14156|1|5e-42|155|tcc:TCM_035745| choline/ethanolamine kinase [EC:2.7.1.32 2.7.1.82]		GO:0016773//phosphotransferase activity, alcohol group as acceptor	-
163	EJK67561.1	hypothetical protein THAOC_11387 [Thalassiosira oceanica]	20378.4	0.054	1	1	1.24	0.084	0.008507	EJK67561.1	MSFHWVNDLPRLLSEIKRVLKPNGCLLFALPGGNTLPELRSSLVLAELERIGGVSTHVGPYIDLSNVGSLLSGTGFKLPTIDVDDIQIGYPNMMVLMEHLNRMGEGNACANRKDRVGLGTFLGAACLYRELYPADENDATEGIVASAQVIYAIAWKEHESQQRPDERGSATRKVGDISVTQTKQAG	100	3e-137	gi|397624888|gb|EJK67561.1|	hypothetical protein THAOC_11387 [Thalassiosira oceanica]	47.25	7e-54	sp|Q54JW0|NDUF5_DICDI	Arginine-hydroxylase NDUFAF5, mitochondrial OS=Dictyostelium discoideum GN=ndufaf5 PE=1 SV=1	138	1e-38	COG2226	Ubiquinone/menaquinone biosynthesis C-methylase UbiE	H	Coenzyme transport and metabolism	K18162|1|4e-43|150|ppp:PHYPADRAFT_143044| NADH dehydrogenase [ubiquinone] 1 alpha subcomplex assembly factor 5 [EC:2.1.1.-]	GO:0008152//metabolic process	-	-
164	XP_002289659.1	predicted protein, partial [Thalassiosira pseudonana CCMP1335]	20343.3	0.227	1	2	1.21	0.13	0.04066	XP_002289659.1	MSNRATSNTSKPPLYKIVMLGDSGVGKTSLVARLTNPDRPLNHDISATMGIEFDTQMLDTPHGKVKAQIWDTAGQERFARVLLPTYFRKAKGVILVYDVTNAKSFESLGERWMTQLNDHANSEELAKLLVGNKCDLEDSREVTREKAEMFCAEFGMEHLETSAKSGENVLKAFERLITIVH	100	4e-135	gi|223999973|ref|XP_002289659.1|	predicted protein [Thalassiosira pseudonana CCMP1335]	47.56	8e-46	sp|Q9SRS5|RAA5B_ARATH	Ras-related protein RABA5b OS=Arabidopsis thaliana GN=RABA5B PE=1 SV=1	79	5e-17	COG1100	GTPase SAR1 family domain	R	General function prediction only	K07976|1|5e-47|155|brp:103849313| Rab family, other!K07910|4|2e-45|152|bdi:100830557| Ras-related protein Rab-18!K07904|5|3e-45|151|mdm:103443592| Ras-related protein Rab-11A	GO:0009944//polarity specification of adaxial/abaxial axis;GO:0007264//small GTPase mediated signal transduction;GO:0010075//regulation of meristem growth;GO:0010014//meristem initiation;GO:0009855//determination of bilateral symmetry;GO:0015031//protein transport	GO:0005525//GTP binding	GO:0005886//plasma membrane
165	EJK64197.1	hypothetical protein THAOC_15101 [Thalassiosira oceanica]	21122.9	0.051	1	1	1.63	0.239	0.007567	EJK64197.1	MKNVSIAIAVAALSSPLPSLAFSARSQHSVARTRLNAVAPAEGSRRNFVSSSIAGAGLAVWISSPSPSLADVSDGNSLPQGAAQFSRVIKVRSQLKSVAKRVAEQSSEMDNKEWDKIDEYLRTVYSAGNDMKEISKGMTDPSKKAKAEEDVKLLQGLVQAAQKPVSKKDAAGFGAIANKADSLFEDFFDQLRDVPDEL	100	7e-122	gi|397616916|gb|EJK64197.1|	hypothetical protein THAOC_15101 [Thalassiosira oceanica]	-	-	-	-	-	-	-	-	-	-	-	-	-	-
166	EED91578.1	predicted protein [Thalassiosira pseudonana CCMP1335]	48593.6	0.022	1	2	1.26	0.109	0.01238	EED91578.1	MRLIDTNTATLLLATTSVVSAFSPSRLVLTTLTKPSPPSHVIHHINHRLTSALRLSYVSEDPLADMSDERKGALFQALLRDLQIEGVPLLGCDANQVHTLNAALWTTMAELGDQDDGQKACLVLEDIPISALLAFAEDFTVLKTQKRLMDYLPELNRFSISPVGKGVGPALLIETTARTDEEKAAAAAQKSMEGNFDKGKTITALRSFIDRVVVGMEACPYTKSADISAVGLESRGVTPGPVGYRFSSSTDACHAMAVFWNCICELMGEPDQNLSSIMLSLPGIGSGSGVEDHNRFAAVVELVGRYLCLFRGDGSFGLVHFHPVYDRGMIHPLEMPAYGHLPPMSWLRPILRMGGHEEEAQQLSDVDLALSNYQRRSPHTAINILRMSQVNAAAGPKSV…	100	0	gi|224003599|ref|XP_002291471.1|	predicted protein [Thalassiosira pseudonana CCMP1335]	-	-	-	-	-	-	-	-	-	-	-	-	-	-
167	EED94903.1	alanine:glyoxylate aminotransferase [Thalassiosira pseudonana CCMP1335]	56390.2	0.031	1	1	1.27	0.069	0.00307	EED94903.1	MMEALHSTIAFVGTIVLARRYICKRSFATADIPASLSEAYKLSNTEVEQYRAQYVSNSCSVSYANSGPLHIIHGKGTRLIDIHGHSYLDTRNNVAHVGHGHPDVVRAITYQVEQLNTNTRYLHPNASLLAKKLSDLLPEPLDVVFFVNSGSEANDLALRLARAYKDSKLPYRPNTQHNIITIDHAYHGHTLATLDVSPYKHRQGTEMRCPDYVRRVPYPDLYRGTHSGTSDEEEAAQKYASYVETACEELSSDGNSLSAFIMEGGMSVAGVILSPRSYVKRCVEAIHKAGAVYIADEVQTGFGRLGSCMWAFQYSNDGEVDEDGIVPDIVTVGKPFGNGMPLAAVVTNRRIASAFESLGVEYFNTFAGNPVCCASGLAMLDVLSKERLQQNALTVGNYL…	100	0	gi|223995573|ref|XP_002287460.1|	alanine:glyoxylate aminotransferase [Thalassiosira pseudonana CCMP1335]	48.05	3e-135	sp|Q6DEB1|AT2L1_XENLA	Ethanolamine-phosphate phospho-lyase OS=Xenopus laevis GN=etnppl PE=2 SV=1	387	2e-122	COG2334	Ser/Thr protein kinase RdoA involved in Cpx stress response, MazF antagonist	T	Signal transduction mechanisms	K14286|1|8e-97|303|csl:COCSUDRAFT_36628| ethanolamine-phosphate phospho-lyase [EC:4.2.3.2]!K00827|2|2e-89|284|bdi:100821851| alanine-glyoxylate transaminase / (R)-3-amino-2-methylpropionate-pyruvate transaminase [EC:2.6.1.44 2.6.1.40]	GO:0008152//metabolic process	GO:0030170//pyridoxal phosphate binding;GO:0008483//transaminase activity	-
168	EED93317.1	predicted protein [Thalassiosira pseudonana CCMP1335]	14711.5	0.083	1	2	1.5	0.317	0.03512	EED93317.1	MIAKSGGRMITTNEQFEQEVLSNKSSLSPDETEYPVLVLFTAPWCGPCRLTNPVVKEVMKQYQNKLTVVEVSTDDLPEVASVAGVLSIPTIQLYHGGKVMDTIVGCVAKNVLARSVDKVLEDLGLLEDEEEEV	100	2e-83	gi|224000215|ref|XP_002289780.1|	predicted protein [Thalassiosira pseudonana CCMP1335]	47.66	4e-29	sp|P12243|THIO1_SYNE7	Thioredoxin 1 OS=Synechococcus elongatus (strain PCC 7942) GN=trxA PE=3 SV=2	107	2e-29	COG3118	Negative regulator of GroEL, contains thioredoxin-like and TPR-like domains	O	Posttranslational modification, protein turnover, chaperones	K03671|1|2e-27|101|olu:OSTLU_31565| thioredoxin 1	GO:0045454//cell redox homeostasis;GO:0006662//glycerol ether metabolic process	GO:0009055//electron carrier activity;GO:0015035//protein disulfide oxidoreductase activity	-
169	EJK56895.1	hypothetical protein THAOC_23125 [Thalassiosira oceanica]	54683.8	0.024	7	15	1.43	0.245	0.02739	EJK56895.1	MACVHHSLPYPTFLHAHTATSAARALSGVGRVRIHPLTCPGAEGRSADGPSPLVEYERIVERNVQQSRVDDSDKSNKENAKLRKRYMKEGVAMAQRYLAQTLGLDVSVASVEIVLSIDSVLKTDGCLASCFLDAGCSHIVVRVKGGEVAKALEACDVTRVPRERLILQWKSGERLFPESVQSQMAAIEERVGTLSIQHTTPVASEKLEWEELKTWKQSSKGKDLRCIVQLSFAGDVSIDDLSATVQSISKVFDEDTGAISLVDPTATQLGMSYAACLKTDRADGFYPTIVVTRSNEALGLVYSSKESIIAALECGRGVYWSRSRGGLWRKGDTSGRHQTLHKIDADCDGDALRFMVTQHGEDRKAFCHLDTLSCWGEPNGIRHLEQTLARRLVDAPAGS…	100	0	gi|397596946|gb|EJK56895.1|	hypothetical protein THAOC_23125 [Thalassiosira oceanica]	53.54	4e-60	sp|O59667|HIS2_SCHPO	Histidine biosynthesis bifunctional protein his7 OS=Schizosaccharomyces pombe (strain 972 / ATCC 24843) GN=his7 PE=3 SV=1	130	2e-31	COG0140	Phosphoribosyl-ATP pyrophosphohydrolase	E	Amino acid transport and metabolism	K11755|1|7e-19|90.5|olu:OSTLU_31034| phosphoribosyl-ATP pyrophosphohydrolase / phosphoribosyl-AMP cyclohydrolase [EC:3.6.1.31 3.5.4.19]	GO:0000105//histidine biosynthetic process	GO:0004636//phosphoribosyl-ATP diphosphatase activity;GO:0004635//phosphoribosyl-AMP cyclohydrolase activity	-
170	EJK72804.1	hypothetical protein THAOC_05626 [Thalassiosira oceanica]	71437.5	0.04	1	5	2.31	0.706	0.01437	EJK72804.1	MGELLEVYEASTSASLAQYKATHASSISDVSGYWSELAKSKLTWFAPFSEGLSGSFEEGSVSWFAGGRLNFVGKENETAIIWEGDEPGNVKHISFHELKNEVCKIANALKSAGVTKGDVVTLYMPMVPELCYTMLACARIGAIHSVIFAGFSADAIADRIQDAKSKWVVTASAGSRGGRNLPLKTICDAAVKKDRCVGVVEKVFVFDGKGETGSDWEVQDIHVKMTELVAAQRPVCSCEWMDAEDPLFILYTSGSTGRPKGLVHTTGGYALFAMHTTANSFGLSQQTAASTDGPKDVYACVADAGWITGHTYIVYGPLLNGCSTLMFESTPMYPDCGRYWDMVQRHKITVFYTAPTAIRSLMRFGDEAPNKYDLSSLRVLGTVGEPINPAAWKWYFDVI…	100	0	gi|397637786|gb|EJK72804.1|	hypothetical protein THAOC_05626 [Thalassiosira oceanica]	52.22	0	sp|Q54Z60|ACSA_DICDI	Acetyl-coenzyme A synthetase OS=Dictyostelium discoideum GN=acsA PE=3 SV=1	690	0	COG0365	Acyl-coenzyme A synthetase/AMP-(fatty) acid ligase	I	Lipid transport and metabolism	K01895|1|0.0|619|mus:104000631| acetyl-CoA synthetase [EC:6.2.1.1]	GO:0008152//metabolic process	GO:0003987//acetate-CoA ligase activity;GO:0016208//AMP binding	-
171	EED91133.1	20S proteasome subunit alpha type 1 [Thalassiosira pseudonana CCMP1335]	30398.4	0.349	2	3	1.21	0.05	0.002705	EED91133.1	MFRNMYDTDVTVWSPEGRLLQVEYAMESVKQGSACIALRSSTHSVIGALKRSVSELSAHQQKILEIDDHLGIGIAGLTADARTLAKWMRNECLNHKYVYGTAIPSGRLVNDLADRHQRTTQTYVRRPYGVGLLVASFDKNGPHVYQTCPSGNVYECYGSAIGARSQSGRTYLEKHSDSFPSCTRDDLIMHALKALVGCVSGDGELTKENGCVAVVGKGEKFTLIEGEELQPYLDRLDLVPPSLQYPSQKTSQLLIRIHNTIPIIITILLDIP	100	0	gi|224002709|ref|XP_002291026.1|	20S proteasome subunit alpha type 1 [Thalassiosira pseudonana CCMP1335]	52.38	3e-97	sp|P18420|PSA1_RAT	Proteasome subunit alpha type-1 OS=Rattus norvegicus GN=Psma1 PE=1 SV=2	135	3e-37	COG0638	20S proteasome, alpha and beta subunits	O	Posttranslational modification, protein turnover, chaperones	K02725|1|3e-101|300|cre:CHLREDRAFT_115213|	GO:0006511//ubiquitin-dependent protein catabolic process	GO:0004298//threonine-type endopeptidase activity	GO:0005737//cytoplasm;GO:0019773//proteasome core complex, alpha-subunit complex;GO:0005634//nucleus
172	AIR75420.1	ribosomal protein L12 (chloroplast) [Cyclotella sp. L04_2]	13482.2	0.141	1	1	2.33	0.485	0.003672	AIR75420.1	MSEKITQIVEELKTLTLLEASELVAAIEETFGVDASASVGGNIVMAAAPAAVEEVEEKTEFNVMLDEVPADKKIAVLKVVRTLTGLGLKEAKELVESTPKVIQEALGKEAAEDAKKQIEDAGGKVSLT	100	1e-71	gi|691189906|gb|AIR75420.1|	ribosomal protein L12 (chloroplast) [Cyclotella sp. L04_2]	91.41	3e-64	sp|A0T0Q7|RK12_THAPS	50S ribosomal protein L12, chloroplastic OS=Thalassiosira pseudonana GN=rpl12 PE=3 SV=1	161	1e-50	COG0222	Ribosomal protein L7/L12	J	Translation, ribosomal structure and biogenesis	K02863|1|1e-29|114|gsl:Gasu_40200| large subunit ribosomal protein L1!K02935|2|5e-27|102|sly:101253247| large subunit ribosomal protein L7/L12	GO:0006412//translation	GO:0003735//structural constituent of ribosome	GO:0005840//ribosome;GO:0009507//chloroplast
173	EJK75781.1	hypothetical protein THAOC_02488 [Thalassiosira oceanica]	33014.9	0.08	3	6	1.56	0.248	0.01154	EJK75781.1	MRLQLAFPVLAAGGCSGFAPGVSHRAATASLKGYLDDLSSELYAPDSSPVPEDESREATKMDKSKVSNFGVGSFEDYVDFGDEFDGGDGQMGVAGDGNKGLEKMDAVPQIASRAMSAKNAWGTSTGYADELRSKNPSIDTARAQQLENWANQQEVRAKNQQLKAMAETFDQTQSSEEENWRQLAKFGVERNTDTDLNEEFGAVTVGDIEGVIELTSTINRVMVHDLYLKNPYMGFADFRAEFTPETPSDWTVEPTEGSLKQREETHFLVKFRPQGPGTIQGYLVIETEDFKKTWQVVGST	100	0	gi|397643306|gb|EJK75781.1|	hypothetical protein THAOC_02488 [Thalassiosira oceanica]	-	-	-	-	-	-	-	-	-	-	-	-	-	-
174	EJK57806.1	hypothetical protein THAOC_22116 [Thalassiosira oceanica]	51668.2	0.026	1	4	1.39	0.211	0.02458	EJK57806.1	MEGKGRMGWVAYQENLSIAFIFSYATTSLPEQSSSYQTPHLKPAVAEVFPESVEENEHHSAEEIETSLNKSGTLAAICNHSKIRDSRISRSATDFDPDLATMVSTRTRTLYTLISFASTDAFVGSLHRCGRGGSLSNVDVGSTSDPYPTSDEFQRRLLEAQLDNRSSIEDNGSGVNGDDEPTANAAPIDIQAVQNSLLRVCAGTDRGQCAKAEQHDEMSRMVSKLEGVAPMSDDPVSSIPPSLAGTWELVYSNVQLFRSSPFFLAGRETCKTEDEAKQYAWFCDMHRAALAISTIGVVRQVISSSGKLVNEFEVKVGSIPFLSDFVPFLTYSGGLPVTVDGAIVSTADITPITSSEWELYMDTVEIKGSNVPFLRDLLDSGNIALKSRALSDLLEQNID…	100	0	gi|397601067|gb|EJK57806.1|	hypothetical protein THAOC_22116 [Thalassiosira oceanica]	-	-	-	-	-	-	-	-	-	-	-	-	-	-
175	EED93777.1	phosphoglycerate kinase [Thalassiosira pseudonana CCMP1335]	40988.2	0.075	1	1	1.35	0.178	0.02678	EED93777.1	MRVDLNVPLSKGDDVTVTDDTRLRAIVPTAKFLLDKGANVILCSHFGRPKGEIIETGKNGRLNPVVGPLKELLGVDVKKVNDCIGEEVESVAKSLTKGEVLLLENTRFYKGETKNDAELAAGLGKLADYFVMDAFGTAHRAHSSTAGVAEHMKMSAAGFLLDKELKYLKGAVDEPNRPLCAIIGGAKVSTKLPVIESLLEKCDVILLGGGMIFTFYKAMGYDIGASMLEEEYVELAGKLMKQAEEKGVKLILPPDVVLADKFAEDANTAVAKASEISGDWMGLDVGPETLELFKEEIGKCNTIVFNGPMGVFEMKPFATGTITVAELMAEATERGATTIVGGGDSVAAVNQAGLGDKVSHISTGGGASLELLEGKELPGVAALSEA	100	0	gi|223997336|ref|XP_002288341.1|	phosphoglycerate kinase [Thalassiosira pseudonana CCMP1335]	58.81	8e-154	sp|Q9LD57|PGKH1_ARATH	Phosphoglycerate kinase 1, chloroplastic OS=Arabidopsis thaliana GN=PGK1 PE=1 SV=1	448	9e-156	COG0126	3-phosphoglycerate kinase	G	Carbohydrate transport and metabolism	K00927|1|6e-158|453|thj:104812374| phosphoglycerate kinase [EC:2.7.2.3]	GO:0016310//phosphorylation;GO:0006096//glycolytic process	GO:0004618//phosphoglycerate kinase activity	GO:0005737//cytoplasm;GO:0016020//membrane
176	EJK62964.1	hypothetical protein THAOC_16407 [Thalassiosira oceanica]	48632	0.206	1	2	1.51	0.329	0.03776	EJK62964.1	MARFSSLIISLVAARASAFTNPGSHVPRQASVLRMSVDTDNKDPVRVGVIGCGRIGIVHLGAINKAPGVVPIVVSNPTVSKAENAAKQFGVPKFTADAMEVITDPDVDAVWICSPSQYHAEQIKACAANGKHVFCEKPIATDLAETVEAINACNEAGVKLMTGLQRRFDPNFLRVRQALIDKEVGDTIIIKTCSRDPSPPPYEYVKGGGGIFNDMAVHDLDMTRFLAGDDPIEILAVGSCHIDKSIEDLPGSEAFDTATCIIRYPNGVNAMVDVCRQSSYGYDQRAEVLGTSGMIATDNVYPNTAKIFKNDFTGNADMPYDFFLSRYFEAYVTETEEFCKSLVEDGPVPCTGIDGLVALVMSLAADKSAAENRWVKFSEIIEKVYCSSPTECSLIANDE…	100	0	gi|397614704|gb|EJK62964.1|	hypothetical protein THAOC_16407 [Thalassiosira oceanica]	38.78	8e-76	sp|O05389|YRBE_BACSU	Uncharacterized oxidoreductase YrbE OS=Bacillus subtilis (strain 168) GN=yrbE PE=3 SV=2	285	2e-91	COG0673	Predicted dehydrogenase	R	General function prediction only	K00010|1|6e-84|265|ccp:CHC_T00009290001| myo-inositol 2-dehydrogenase / D-chiro-inositol 1-dehydrogenase [EC:1.1.1.18 1.1.1.369]	GO:0055114//oxidation-reduction process	GO:0000166//nucleotide binding;GO:0050112//inositol 2-dehydrogenase activity	-
177	EJK61207.1	hypothetical protein THAOC_18346, partial [Thalassiosira oceanica]	37529.9	0.036	1	1	1.49	0.051	0.0001748	EJK61207.1	GASPQEIKEAADAAAPPASFFDLQQASVKAAQMAMDDGFGLLEVEFPPLPANVLEMDDVSAYDVAKANVNLALDFAKAFATTGPKNNVAILLPDESECQIMREDLEMDSNPFPGVTLTSLRRSEEGDDRVFKPENVLIGLLGRGSGGTVKPIEDTSMYIIIGASAQELPDVEELYEQIKDQKDEETGKSPVIVFYNLKLDILRGDLGAPAFPSKEFQDRFLSRVKPVYYLRTRQYSRSISQPPFILNFQGCIFRSYPGHYQTLLDTGTGRYRKVVGNDLRPALGEFKEQLTDALREEGAIAKKEEEGALFGFLRTGYKTTTWWEEERENASMDWRL	100	0	gi|397611168|gb|EJK61207.1|	hypothetical protein THAOC_18346, partial [Thalassiosira oceanica]	32.82	1e-41	sp|Q8H0W0|LPA3_ARATH	Protein LOW PSII ACCUMULATION 3, chloroplastic OS=Arabidopsis thaliana GN=LPA3 PE=1 SV=1	-	-	-	-	-	-	-	-	-	-
178	EJK57033.1	hypothetical protein THAOC_22972 [Thalassiosira oceanica]	32243.6	0.031	1	1	1.43	0.2	0.01518	EJK57033.1	MTSFRTILQPKENKIETRLRGCARDRVAAGMGGFSWRATRETTSQQDQQDNNMRSSLVVAGAASALLVLSNHAVAVAGNSAAECDTWAESGECSLNPKYMLQHCADACARQAELDSEMAEAIESKIGHVTSFFDLEAQDIDENVITFDEYKGKVTVITNVASHCGYTESHYRGMVKLYKRFSGSAVGFNILAFPCNQFGEQEPEACPNIKRFAEKKGVEFTMMNKILVNGLDAHNVYHFLKKVAGPPSIAWNFATYYVVSPDGVVQSLSGVEPMDLVPAILEAMGVDSSEL	100	0	gi|397597528|gb|EJK57033.1|	hypothetical protein THAOC_22972 [Thalassiosira oceanica]	44.9	9e-31	sp|P38143|GPX2_YEAST	Glutathione peroxidase 2 OS=Saccharomyces cerevisiae (strain ATCC 204508 / S288c) GN=GPX2 PE=1 SV=1	110	1e-27	COG0386	Glutathione peroxidase, house-cleaning role in reducing lipid peroxides	VI	Defense mechanisms;Lipid transport and metabolism	K00432|1|8e-29|111|csl:COCSUDRAFT_30410| glutathione peroxidase [EC:1.11.1.9]	GO:0006979//response to oxidative stress;GO:0055114//oxidation-reduction process;GO:0080167//response to karrikin	GO:0004602//glutathione peroxidase activity	-
179	EED91766.1	Rad23 like protein, partial [Thalassiosira pseudonana CCMP1335]	34977.4	0.024	1	3	1.49	0.254	0.02011	EED91766.1	MNLTVKTLKGGKFTVEVEAEKTVAEVKVAIQTNKDLPASSMKLIHSGKVLKDEDKIESCNIKPNDFLVVMIAKVSSWLCTIAKAATPAPTAAAATESTTVAVPATPAAATNPPTPGAPSASTSNAAAASTPAATTAPASSVSSPDEFPAEVIDNLKALGFPESEVRVCLRASNGNPDVAVEFLMNGIPPGIGGGSQPAAATSGGASSSGAGNGGPLDALRSHPQFDDLRRLVQTNPSTLQAVLSQIGQQQPDLLQAINANQAEFLQMMNEPMISAMPQEQVQQYMNMAMQAQVLRLSEEEMAAVDRLTEMGFDRSEAAQAYLACDKNEALAANLL	100	2e-106	gi|224003975|ref|XP_002291659.1|	Rad23 like protein [Thalassiosira pseudonana CCMP1335]	47.15	9e-24	sp|O74803|RHP23_SCHPO	UV excision repair protein rhp23 OS=Schizosaccharomyces pombe (strain 972 / ATCC 24843) GN=rhp23 PE=1 SV=1	-	-	-	-	-	-	K10839|1|2e-25|108|csl:COCSUDRAFT_24706| UV excision repair protein RAD23	GO:0043161//proteasome-mediated ubiquitin-dependent protein catabolic process;GO:0006289//nucleotide-excision repair	GO:0003684//damaged DNA binding	GO:0005634//nucleus
180	XP_002285993.1	predicted protein [Thalassiosira pseudonana CCMP1335]	25223.2	0.038	1	1	1.94	0.386	0.007229	XP_002285993.1	MKLLTTTILFSTVASVLAFQTPSGDSKSSLINRSDFLTTSSAAAVSTLVLTPIQSASARGRATLDYAYDRYVPRINEGGKFYKTELYGSIAKGNWKGLEAATAEPPKKTREDRALQDGGVAKRAALAGGFSDARVLTAMDLFAATFSDSSITPKTKAMKAEVETLRDVVSGMNKAARLALGEEKGGGGGLFGIGGKAPSQSELAKQVQELYLKGGNAYNQYVFLANDGLPVQLAKLPFL	100	7e-157	gi|223992619|ref|XP_002285993.1|	predicted protein [Thalassiosira pseudonana CCMP1335]	-	-	-	-	-	-	-	-	-	-	-	-	-	-
181	XP_002290106.1	predicted protein [Thalassiosira pseudonana CCMP1335]	21260.8	0.062	2	5	1.21	0.116	0.0312	XP_002290106.1	MFSIYATSLSKASTRHIARQAGAVQFARRGMVTPKLEEAARDANYAWKKSCYSGMDYTIGDESTVFEAVNKLAAYDVGCLVTKDANGNLSGVISERDYVQKIALLGKSSKDTLVRQISTKAADLVTASPSDTVDACMQKMLTRDIRHLPLVDESGAVVGIISIKDLIKTCLEEKEHVIHQLSSFAVGEGGHFVM	100	3e-143	gi|224000868|ref|XP_002290106.1|	predicted protein [Thalassiosira pseudonana CCMP1335]	34.38	2e-19	sp|Q9LEV3|CBSX3_ARATH	CBS domain-containing protein CBSX3, mitochondrial OS=Arabidopsis thaliana GN=CBSX3 PE=1 SV=1	110	2e-29	COG0517	CBS domain	T	Signal transduction mechanisms	-	GO:0008152//metabolic process	GO:0003824//catalytic activity	-
182	XP_002289319.1	predicted protein [Thalassiosira pseudonana CCMP1335]	57601.7	0.042	3	8	1.83	0.176	0.001146	XP_002289319.1	MSPSKKQKTDNGALWELDEETMNSGAVGFTASQIFMKNPACVAYTYDDVIMMPGHINFGLNEVDISTKLTKKISLKVPFVSSPMDTVTEHKMAISMALQGGIGIIHSNFTMEDQAEEVRKVKRFKNGFITDPICLSPSSTVGDVIELKEKHGYSGIPITDNGRMGGKLVGIVSNRDITFVDDRTMKLEEIMTPRDKLSVAKQGVELIEANEILKETKKGKLPVVNDADELVALIARTDLLKNIEFSQASKDHVTKQLLVGAAIGTRLEDRDRAAALVEAGVDVIVVDSSQGDSLYQLDIVKHLKASHPKLQVIAGNIVTPLQAIHLIQAGADGLRVGMGIGSICTTQEVCAVGRAQASAVYHVAKFARKHGVPILADGGIKSTGHITKALSLGASCVMM…	100	0	gi|223999293|ref|XP_002289319.1|	predicted protein [Thalassiosira pseudonana CCMP1335]	60	0	sp|Q54QQ0|IMDH_DICDI	Inosine-5'-monophosphate dehydrogenase OS=Dictyostelium discoideum GN=impdh PE=1 SV=1	564	0	COG0517	CBS domain	T	Signal transduction mechanisms	K00088|1|0.0|619|cme:CYME_CML243C| IMP dehydrogenase [EC:1.1.1.205]	GO:0006177//GMP biosynthetic process;GO:0055114//oxidation-reduction process	GO:0003938//IMP dehydrogenase activity;GO:0046872//metal ion binding	-
183	XP_002293455.1	vacuolar proton pump alpha subunit [Thalassiosira pseudonana CCMP1335]	68736.6	0.227	3	10	1.42	0.284	0.04313	XP_002293455.1	MTEYEKESDYGFIFKVSGPLVVADGMSGSAMYELVRVGHSKLVGEIIKLEGDTASIQVYEDTSGLTVGDPVLRKKQPLSVELGPGIMGTIFDGIQRPLEHIFQDSGDVYVPKGVDIPCLTRDVRWTFTPTTIQEGQPVTGGDVIGIVYENEIINSHKILVPPNVYGTVTKLHSTGTDGQETFSIDDVVMEVYNESQDKTHYLTLSHFWPVRRPRPIAEKLPGNVPLITGLRVIDGLFPSVLGGTCAVPGAFGCGKTVISQSLSKFSNSDVIVYVGCGERGNEMAEVLCDFPELTMTIKDEEGKEKEVGIMKRTTLVANTSNMPVAAREASIYTGITLAEYFRDQGMNVSMMGDSTSRWAEALREISGRLGEMPADSGYPAYLGARLAAFYERAGRVSCL…	100	0	gi|224008993|ref|XP_002293455.1|	vacuolar proton pump alpha subunit [Thalassiosira pseudonana CCMP1335]	61.91	0	sp|O23654|VATA_ARATH	V-type proton ATPase catalytic subunit A OS=Arabidopsis thaliana GN=VHA-A PE=1 SV=1	599	0	COG1155	Archaeal/vacuolar-type H+-ATPase catalytic subunit A/Vma1	C	Energy production and conversion	K02145|1|0.0|803|jcu:105646144| V-type H+-transporting ATPase subunit A [EC:3.6.3.14]	GO:0042777//plasma membrane ATP synthesis coupled proton transport;GO:0015991//ATP hydrolysis coupled proton transport	GO:0046933//proton-transporting ATP synthase activity, rotational mechanism;GO:0005524//ATP binding;GO:0046961//proton-transporting ATPase activity, rotational mechanism	GO:0033180//proton-transporting V-type ATPase, V1 domain
184	XP_002290941.1	predicted protein, partial [Thalassiosira pseudonana CCMP1335]	19588.1	0.262	2	15	1.44	0.245	0.02428	XP_002290941.1	YSFKIVLLGDSGVGKSNLVFRFTKNEFNKDSKSTIGVEFATKTVQIEDDKLVKAQIWDTAGQERYRSIASSYYRGAVGALLVYDVTDRNSFNHVPMWLKEVEENAEKDCLIMLVGNKMDLHEQRTVFVRDGRSFARKNGLAFIETSALDATGVDTAFQRILQEIYKTQTKKQ	100	1e-125	gi|224002539|ref|XP_002290941.1|	predicted protein [Thalassiosira pseudonana CCMP1335]	63.37	2e-75	sp|P62494|RB11A_RAT	Ras-related protein Rab-11A OS=Rattus norvegicus GN=Rab11a PE=1 SV=3	97.8	2e-24	COG1100	GTPase SAR1 family domain	R	General function prediction only	K07904|1|1e-76|231|osa:4334746| Ras-related protein Rab-11A	GO:0007264//small GTPase mediated signal transduction;GO:0015031//protein transport	GO:0005525//GTP binding	-
185	EJK60133.1	hypothetical protein THAOC_19570, partial [Thalassiosira oceanica]	145770	0.029	1	1	1.29	0.158	0.02609	EJK60133.1	RLSSRRRWGRRRGVSEAYRAAIGREEDRLAIHADVGRFGTDDPATWSMGDRLTFLELKFIDMLGSSIPKRSSVYRKLTLLEFKAAPRNFAIQDKQKKWKDDSAMHAPSPGGRTPNFGAAIMRVKFEVWPRGGNGRGRRSAFGSALSLPSCVRDAFPESHTCRDCLGEGRPFGKIMAANRGEIATRIMRAGSELGCGTVGIYSHEDRFTQHRYKADQAFQLNTDKSPVAAYLDIDTIVDLCCQHGVQAVHPGYGFLSENAGFAQKLEENGVKFIGPTVDNLNTFGDKTSAKELAIKAGVPVIVGSDDAFATPAQAEAWINSSPITYPVIVKAAMGGGGRGIRIVPTADDLDQMFRLASNEALNAFGDGRCFVEKYVDQPRHIEVQCLGDGTGNVIHLYDR…	100	0	gi|397608901|gb|EJK60133.1|	hypothetical protein THAOC_19570, partial [Thalassiosira oceanica]	53.32	0	sp|O17732|PYC1_CAEEL	Pyruvate carboxylase 1 OS=Caenorhabditis elegans GN=pyc-1 PE=1 SV=1	1152	0	COG1038	Pyruvate carboxylase	C	Energy production and conversion	K01958|1|0.0|1176|mis:MICPUN_96455| pyruvate carboxylase [EC:6.4.1.1]	GO:0006094//gluconeogenesis	GO:0004736//pyruvate carboxylase activity;GO:0046872//metal ion binding;GO:0005524//ATP binding;GO:0004075//biotin carboxylase activity	-
186	EED95038.1	predicted protein, partial [Thalassiosira pseudonana CCMP1335]	15810.9	0.196	6	25	1.75	0.356	0.01408	EED95038.1	SELDGSKLQIGILRTRWNDEHVSNLVDGIKAGLKGCKVDEDKIFIKEVPGAYELPYAAKLLAMSGTVDAIICCGVLIKGETLHFEYISEAVSKGIMDVNLSTMTPVIYGVLNCLDEEQVKKRSSNENGGHNHGEDWGKTAVEM	100	3e-102	gi|223995843|ref|XP_002287595.1|	predicted protein [Thalassiosira pseudonana CCMP1335]	42.05	1e-41	sp|Q9UVT8|RIB4_MAGO7	6,7-dimethyl-8-ribityllumazine synthase OS=Magnaporthe oryzae (strain 70-15 / ATCC MYA-4617 / FGSC 8958) GN=MGG_04626 PE=1 SV=1	112	8e-31	COG0054	6,7-dimethyl-8-ribityllumazine synthase (Riboflavin synthase beta chain)	H	Coenzyme transport and metabolism	K00794|1|1e-44|147|ccp:CHC_T00007345001| 6,7-dimethyl-8-ribityllumazine synthase [EC:2.5.1.78]	GO:0009231//riboflavin biosynthetic process	GO:0004746//riboflavin synthase activity	GO:0009349//riboflavin synthase complex
187	EED89162.1	predicted protein [Thalassiosira pseudonana CCMP1335]	32693.9	0.05	1	1	1.4	0.259	0.03762	EED89162.1	MTSITLMTVAIVGFLQLQCCSAWTTNLSPTTARLPSRLGAEKIDLDGNDASSRRSFLQTASVIVASSIITNSGFANADSGDDELINVYFGCGCFWHVQHEFVEAEKKTLGRRPDEATSRAGYAGGKAGALDGKVCYHNAQGIADYGKLGHAEVVSMRIPARKFELFAEEYCKLFDKDGFRPDQFGDRGSEYRNLVGVPGGKNSAYAEMLVKASVATGDKLDFAVGKGDDKDVPKVVFIMDTNEFPFYVGERYHQFHDGFNFGEDYPKEYNGLATKFAKDGENFGDCPNGLVGIGIGGL	100	0	gi|224008935|ref|XP_002293426.1|	predicted protein [Thalassiosira pseudonana CCMP1335]	-	-	-	-	-	-	-	-	-	-	-	GO:0055114//oxidation-reduction process;GO:0019538//protein metabolic process	GO:0016671//oxidoreductase activity, acting on a sulfur group of donors, disulfide as acceptor	-
188	EED93364.1	predicted protein [Thalassiosira pseudonana CCMP1335]	76705.2	0.1	1	2	1.36	0.067	0.001103	EED93364.1	MNKRLYYNSDTKADSSIPRHHFSSLQAGDTSTQDLWCTTFNTHCTHTIAMKFSPAVTLALAAAFPTAAAFVTCPSRHAATIGTSSTSSTRLNVQLEAPKKDLPKIEKLKIASNYLREPLGEQLATEEIGISKDAYQILKYHGSYQQNNRETRGPKDYQFMLRLKQPAGELPPDLYRLLDDLSSKHGQGDLRATTRQCFQIHGILKGDLKTVISSIMNMGSSTVGACGDVSRNVMTTPAPFDTPAYNYAREYSKVFAQLFRPMSTAFSEIWLDGEKAASVETWAKEVEHHNVDEAMLYDSGRGIILPDSTEPIYGTQYLPRKFKIGVTVPGDNSLDIYTNDIGVVVICNDAGELEGFNVMVGGGMGRTHNKENTFARAADHMGFVPKEDIMEVMKAIVAA…	100	0	gi|224000309|ref|XP_002289827.1|	predicted protein [Thalassiosira pseudonana CCMP1335]	53.6	0	sp|P30008|SIR_SYNE7	Sulfite reductase [ferredoxin] OS=Synechococcus elongatus (strain PCC 7942) GN=sir PE=3 SV=2	652	0	COG0155	Sulfite reductase, beta subunit (hemoprotein)	P	Inorganic ion transport and metabolism	K00392|1|0.0|691|ccp:CHC_T00008525001| sulfite reductase (ferredoxin) [EC:1.8.7.1]	GO:0019219//regulation of nucleobase-containing compound metabolic process;GO:0055114//oxidation-reduction process;GO:0006259//DNA metabolic process;GO:2000112//regulation of cellular macromolecule biosynthetic process	GO:0050311//sulfite reductase (ferredoxin) activity;GO:0003677//DNA binding;GO:0051539//4 iron, 4 sulfur cluster binding;GO:0020037//heme binding	GO:0042644//chloroplast nucleoid
189	EJK49501.1	hypothetical protein THAOC_31619 [Thalassiosira oceanica]	66638.7	0.015	1	1	1.39	0.228	0.03152	EJK49501.1	MVPSFAGKTGSLIDFMLSIPMAVCHSQYQYLTAAAAYYYILQTCGGAQPHLLFKITWKRLHHYPNVLLRAGGGVAKSLTYVWTSGLMVMCMVRVHGHGALRIVAKLMSPLDLVEGTILIREGTPQDTFYLVDSGVLVRAKNVPDSAETIDLDTIGPAATSGFLHVAGVEDDDVAFATITAGKGGCRCYAAKGDEFRALCVNPTFSAQLISVLTKVVRTATKVVRATVSTGSGSGVDLHTSNSSVFKVLCYDTTQWVTDNFTPQIEKYNDHEGGMNIKMDFTQDRLSEGTAKFAAGYDAVCLFVNDTADSNAIRILSLCGVKMIAMRCAGFDRVDVQTAKALGIRWVQGSNSSFSVSTDTKRFLETLRSIARVPAYSPYAVAEHAIALLMSVNRKIAQAN…	100	0	gi|397575037|gb|EJK49501.1|	hypothetical protein THAOC_31619 [Thalassiosira oceanica]	42.11	2e-80	sp|P44501|DDH_HAEIN	2-hydroxyacid dehydrogenase homolog OS=Haemophilus influenzae (strain ATCC 51907 / DSM 11121 / KW20 / Rd) GN=ddh PE=3 SV=1	283	7e-89	COG1052	Lactate dehydrogenase or related 2-hydroxyacid dehydrogenase	CHR	Energy production and conversion;Coenzyme transport and metabolism;General function prediction only	K03778|1|2e-77|252|ccp:CHC_T00003974001| D-lactate dehydrogenase [EC:1.1.1.28]!K00058|3|3e-29|126|bvg:104901403| D-3-phosphoglycerate dehydrogenase [EC:1.1.1.95]	GO:0055114//oxidation-reduction process	GO:0051287//NAD binding;GO:0016616//oxidoreductase activity, acting on the CH-OH group of donors, NAD or NADP as acceptor	-
190	EJK43642.1	hypothetical protein THAOC_37895 [Thalassiosira oceanica]	67525.6	0.013	2	5	1.26	0.021	0.0001097	EJK43642.1	MRLLRSLLLPFGASLSFVALLLLHASHNRVSSFTSPFTSTSRPRRNHLTRIARPSTAATVEESTGCSVGDTRGATLLLSNLHISTGSGDQILRDINFRVESRERWGIVGANGCGKSTLLGAITGAVRIDQGKALVASKVKVGYLKQTAVSGSRKTVRDEAASEMQEINNEKERMAMLEKLVADGDASDDTLNKLARSQARFEDIGGFTQEQDVDVVLKGLGFQPPDSNRLVSDFSGGWQMRIALARLLLSKPATRVSELLSLRVAPPILTSKSSNHLDSSARDWLATYLSKYEGSIILVSHDVALLSKGTSSIAEVSGKTLVKYVSCTYEKYLQEKEFRAKSAIAEYERNLKEAERLQDFVDKFGASATKASQAQSRVKAIERMRKEGKLDPPPLAVTA…	100	0	gi|397563064|gb|EJK43642.1|	hypothetical protein THAOC_37895 [Thalassiosira oceanica]	34.75	6e-69	sp|O05519|YDIF_BACSU	Uncharacterized ABC transporter ATP-binding protein YdiF OS=Bacillus subtilis (strain 168) GN=ydiF PE=3 SV=2	282	2e-85	COG0488	ATPase components of ABC transporters with duplicated ATPase domains	R	General function prediction only	K06158|1|2e-62|223|gsl:Gasu_15030| ATP-binding cassette, subfamily F, member 3!K06185|2|1e-61|219|sot:102590308| ATP-binding cassette, subfamily F, member 2	GO:0006200//ATP catabolic process	GO:0005524//ATP binding;GO:0016887//ATPase activity	-
191	EJK44057.1	hypothetical protein THAOC_37440 [Thalassiosira oceanica]	78444.6	0.014	1	3	1.57	0.266	0.01417	EJK44057.1	MSAASSEEDPYLWLEEVESEESLAFAKKSNEHCLAELGDPARTETYKRVLTALESDDRIPYARVLGYTEEGEPLLYNFWKDGDNPKGIWRKTTLSSYESASTQWTTVLDLDELGKKDGISWVWKGYVPLPRSLDEKSGYVKATETSPAQGRVTRVLLNLSRGGADATYLKEFDLLTETFVDAAGDDQGFALPEGKTRARYKSRDVLLVGADTGEGSLTSSGYPRTCREWKRGTKIEDAPLVFEGEETDVSCGQYFYDEMHREGGDVYTVQSRSVTFYESVYNVQKGEDGEFVKLAIPATTQPSFFGRWMLLHVKSKWLPEDNGSVSETFETGSFIYVDADAFLEFSRSKAEGKEPSKLEYHVLFEPSVTTSYNGYSATKNYLILYSLDNVKEKMEFYKI…	100	0	gi|397564086|gb|EJK44057.1|	hypothetical protein THAOC_37440 [Thalassiosira oceanica]	36.15	2e-125	sp|P55577|Y4NA_SINFN	Uncharacterized peptidase y4nA OS=Sinorhizobium fredii (strain NBRC 101917 / NGR234) GN=NGR_a02410 PE=3 SV=1	516	2e-173	COG1505	Prolyl oligopeptidase PreP, S9A serine peptidase family	E	Amino acid transport and metabolism	K01322|1|1e-45|174|mtr:MTR_1g026370| prolyl oligopeptidase [EC:3.4.21.26]	GO:0008152//metabolic process	GO:0008236//serine-type peptidase activity	-
192	XP_002289883.1	predicted protein, partial [Thalassiosira pseudonana CCMP1335]	63799.3	0.055	2	3	1.42	0.242	0.02752	XP_002289883.1	GEKGAFEWMTYGEYGEMVDACRTVLKDLGIKEHSKIGIISNNRWEWAALASAAYSLNAAIVPMYESQLPKDWTYILNDSECSALFCSTEEIFVKVVKEVLPNTPLVSNTLCFNTPVGEPHSLLTAIEHAKGKETGVIAPTPEDLAGLIYTSGTTGKPKGVELTHDNFVSNVYAVRTMAEDPTDFIRSSDRSLAFLPWAHSYGQTCELWCAVSHGGSMGICRGVPQILEDLALVQPTVLFAVPTLYKKVYDGVQNLIGTSSPTKQKLMRAALDMGRKYKETGGNLGFVDGIKHKVLDSVVTSKIRGRFGGNLRHGFVAGAACPKEIIDFMDDIGIPICEGYGLTETSPIIAISAPYPGSRKLGSVGKSVGGVNVVIEDPDTHQPLGPGKEGEICCYGRNV…	100	0	gi|224000421|ref|XP_002289883.1|	predicted protein [Thalassiosira pseudonana CCMP1335]	29.44	5e-61	sp|Q7TYX8|FAC15_MYCBO	Long-chain-fatty-acid--CoA ligase FadD15 OS=Mycobacterium bovis (strain ATCC BAA-935 / AF2122/97) GN=fadD15 PE=3 SV=2	466	1e-156	COG1022	Long-chain acyl-CoA synthetase (AMP-forming)	I	Lipid transport and metabolism	K01897|1|3e-69|240|thj:104818701| long-chain acyl-CoA synthetase [EC:6.2.1.3]	GO:0008152//metabolic process	GO:0003824//catalytic activity	-
193	EJK73254.1	hypothetical protein THAOC_05131 [Thalassiosira oceanica]	117849	0.034	1	1	1.61	0.246	0.008885	EJK73254.1	MMANEGIKKQTFAMSLLVALAFEGKIATSFQSSRQGGRFVRQFLSRSTSLCAKGGGKKPKNAYADTILLPQTDFSQRANAIKREPELQEYWKSIDLYSKLSSDAESRSAERFVLHDGPPYANGDLHIGHALNKLLKDFINRHQILKGKQVHYVPGWDCHGLPIELKVLQTMKSKERQGLTPIALRERAATFAKETVEKQSASFQRYGVIGDFDNPYLTLLPEYEAAQIRVFGEMYKQGFIFRGRKPVHWSPSSRTALAEAELEYPEGHVSKSIYVALDVVSPSEELQQHVGSGNLKVAIWTTTPWTIPANLAVAINPELEYCVVDAHPNVLDGQSKLLVAKGLVESLETKFDLSDGDNLKVIASFNGSSLVGTSYQHPLYERQSPVIAGGDYITTESGT…	100	0	gi|397638857|gb|EJK73254.1|	hypothetical protein THAOC_05131 [Thalassiosira oceanica]	58.44	0	sp|Q8YXY3|SYI_NOSS1	Isoleucine--tRNA ligase OS=Nostoc sp. (strain PCC 7120 / SAG 25.82 / UTEX 2576) GN=ileS PE=3 SV=1	1149	0	COG0060	Isoleucyl-tRNA synthetase	J	Translation, ribosomal structure and biogenesis	K01870|1|0.0|1073|ppp:PHYPADRAFT_56033| isoleucyl-tRNA synthetase [EC:6.1.1.5]	GO:0006428//isoleucyl-tRNA aminoacylation;GO:0006450//regulation of translational fidelity	GO:0004822//isoleucine-tRNA ligase activity;GO:0002161//aminoacyl-tRNA editing activity;GO:0008270//zinc ion binding;GO:0005524//ATP binding	GO:0005737//cytoplasm
194	EJK59733.1	hypothetical protein THAOC_20006 [Thalassiosira oceanica]	35430.2	0.056	2	2	1.51	0.174	0.006053	EJK59733.1	MPKRDESPQPRNSRNSLLVLPPYSSVVDIGAKGSSSHSRIMRQTISKLAFLAFSSLPSSTSFSPSCYSQPSPSSSSALHAEASASSVPAAVKPIEEGSHDELMYALGVNLARQLGDVKPLVENSDELTQLARGLIDTVVGKFDDESQRALLARRGEDLNKVIVERANAVREKIENAGKSMLEEMAKNEETATLESGVIIHPLEAGPEGFGKGVRPTAASTVKVHYHGTLPDGTVFDSSIGKDPVTFPLGGVIPGWREGLLKMSEGETAMLGIPSNMAYGEQGTPDGRIPGGAALFFKIQLIEVLSAGIGGGPQLVGADGQALKKESSGGLLGADGKPL	100	0	gi|397607569|gb|EJK59733.1|	hypothetical protein THAOC_20006 [Thalassiosira oceanica]	35.55	8e-28	sp|O08437|FKBA_AERHY	FKBP-type peptidyl-prolyl cis-trans isomerase FkpA OS=Aeromonas hydrophila GN=fkpA PE=3 SV=1	125	1e-32	COG0545	FKBP-type peptidyl-prolyl cis-trans isomerase	O	Posttranslational modification, protein turnover, chaperones	K09569|1|2e-22|94.4|smo:SELMODRAFT_96017| FK506-binding protein 2 [EC:5.2.1.8]	GO:0006457//protein folding;GO:0000413//protein peptidyl-prolyl isomerization	GO:0003755//peptidyl-prolyl cis-trans isomerase activity	-
195	EED89623.1	hypothetical protein THAPSDRAFT_263880, partial [Thalassiosira pseudonana CCMP1335]	19094.7	0.096	3	6	1.25	0.088	0.007899	EED89623.1	KKEKKAKEAAASKAGQSNQPEFTKMDIRVGQITKVWNHEEADKLFCEEIDVGEEGGPREIASGLREHYSLDDMQDRKVLVVCNLKPAKIVGFTSNGMVLAAKSEDGKSVELVTPPADAAVGERVFIDGLSGEPFSSTQVKKKKTWEAVAKGLKTGEGGVATWDGKEIKTSSGVCSAA	100	3e-117	gi|224008406|ref|XP_002293162.1|	hypothetical protein THAPSDRAFT_263880 [Thalassiosira pseudonana CCMP1335]	51.66	3e-38	sp|Q9ZTS1|SYM_ORYSJ	Probable methionine--tRNA ligase OS=Oryza sativa subsp. japonica GN=Os06g0508700 PE=2 SV=2	93.6	7e-21	COG0143	Methionyl-tRNA synthetase	J	Translation, ribosomal structure and biogenesis	K01874|1|4e-41|150|atr:18432220| methionyl-tRNA synthetase [EC:6.1.1.10]!K15437|2|9e-40|143|bpg:Bathy10g01870| aminoacyl tRNA synthase complex-interacting multifunctional protein 1	GO:0006418//tRNA aminoacylation for protein translation	GO:0004812//aminoacyl-tRNA ligase activity;GO:0000049//tRNA binding;GO:0000166//nucleotide binding	-
196	EJK73898.1	hypothetical protein THAOC_04455 [Thalassiosira oceanica]	53523.5	0.195	1	1	1.4	0.276	0.04518	EJK73898.1	MRTTAFRRWIEGRRVSNNAGDLAPATPATDRDRGRSHLPCRVVLLRVPYYAMRRTAQRGRREDEQRLRRCLIRIGGAIGVKPPRGSFAGITRRSSKSPAHGAPTKGGLITSGSSTALSMVGEEYAVIPDGGLSPCIIKVVGVGGGGCNAVDRMLDTRVSGVDFWSINTDAQALGRSKAKGAKVLNIGTSATRGLGAGGNPEVGQLAAEESRAEIAAMVEGTDLCFVTSGMGGGTGSGAAPVVAEVSREAGALTVGIVTKPFRFEGKRRMRQAVGAIERLKQHVDTVIVVSNDRLLDIIPENTPMNRAFAVADDILRQGVVGISEIIVKPGIINVDFADVRSVMSDAGTALMGIGIGSGKTGAEDAATAAISSPLLDSSIDNAKGVVFNISGGEGLSLTD…	100	0	gi|397640035|gb|EJK73898.1|	hypothetical protein THAOC_04455 [Thalassiosira oceanica]	63.95	2e-116	sp|P73456|FTSZ_SYNY3	Cell division protein FtsZ OS=Synechocystis sp. (strain PCC 6803 / Kazusa) GN=ftsZ PE=1 SV=1	366	2e-121	COG0206	Cell division GTPase FtsZ	D	Cell cycle control, cell division, chromosome partitioning	K03531|1|2e-127|384|cme:CYME_CMS004C| cell division protein FtsZ	GO:0051258//protein polymerization;GO:0006184//GTP catabolic process;GO:0007017//microtubule-based process	GO:0003924//GTPase activity;GO:0005525//GTP binding	GO:0005874//microtubule;GO:0005737//cytoplasm
197	EED94476.1	predicted protein [Thalassiosira pseudonana CCMP1335]	35058	0.115	2	7	1.3	0.177	0.03259	EED94476.1	MNLFTATSTLLAIIGTSTITQLNAFSPSSPLASTTRSTATLYAESNPFVENAKTIASSVHSLNGQTIVVKYGGNAMTTPELAYGFCQDIATLQKLGMRIVVVHGGGPMINAMLEKVGVESRFEGGMRVSTKEVVDVAAMVLCGDVNKSISGGVVLAGGRALGLSGRDDGLLQCEKLWGGDDGSLDLGNVGQVKVVNTELINELLDQGITPVIAPIGMGVKGAEDAAVVYNINADVAAGRIAGELKAARVLFLTDIAGVLDKEMQLMESLTCDDIDGLIKDETITGGMIPKVTYATDAVKLGVQGAFITDGRVPHALLNEILAGGEEGLGSGGGGTVVTL	100	0	gi|223998734|ref|XP_002289040.1|	predicted protein [Thalassiosira pseudonana CCMP1335]	43.58	2e-62	sp|B5ZN33|ARGB_RHILW	Acetylglutamate kinase OS=Rhizobium leguminosarum bv. trifolii (strain WSM2304) GN=argB PE=3 SV=1	248	4e-79	COG0548	Acetylglutamate kinase	E	Amino acid transport and metabolism	K00930|1|5e-47|165|osa:4330205| acetylglutamate kinase [EC:2.7.2.8]	GO:0006526//arginine biosynthetic process;GO:0006561//proline biosynthetic process	GO:0003991//acetylglutamate kinase activity;GO:0004349//glutamate 5-kinase activity	GO:0005737//cytoplasm
198	EJK47518.1	hypothetical protein THAOC_33755 [Thalassiosira oceanica]	59708.9	0.015	2	2	1.23	0.036	0.000769	EJK47518.1	MEDYDVGREHIMSVIEDSKSLESKDRIALVSLGDLGESKNCDHNDDNPYELFAGTTQCHNLAANFLGSFGVPYEVIGGNHDLEGIDEFDSDDMNLRRFLKSHGKETPQFCRQIAEKTLLVGLCSTVFRDAKYTSHEVVVDEAQIRWFEDLVKSKPAEDGWRIFVFTHAPPNGSGLRIIQENHVVNGCCWLNHSNENQCRKFIELVREHRSIKGWFSGHFHLGQDYQDSITFPTIDPSEGPYPNRGSCIFAQTSVMRAGTSRDGRQQSRLLRGTKDGFEICTIDHKKDGKVRLDATITYRSNTNQVGVYAHDDAAYDHDNYFKVYQPVFDDEGYVCTEDDEFECLLTPEAITRDTHKWWKLACGRVLGVANGMLLEYDRSTLAPLGLVMSADEIIGKHIA…	100	0	gi|397570901|gb|EJK47518.1|	hypothetical protein THAOC_33755 [Thalassiosira oceanica]	-	-	-	-	-	-	-	-	-	-	-		GO:0003824//catalytic activity	-
199	XP_002287523.1	pyruvate dehydrogenase [Thalassiosira pseudonana CCMP1335]	42198.1	0.027	1	1	1.3	0.189	0.03883	XP_002287523.1	MSTDTATFDLTGSFETYNLDTQPNNTIEMTKDELLSHFELMYTMRRMEITCDNEYKARAIRGFCHLYDGQEAVATGINAAFDPEDSWITSYRCHCTALARGGSVASVLGELFGHVDGQTKGKGGSMHFYNKAHNFFGGQGIVGAQVPVGLGLAFANHYNATPGKPMQVAIACYGDGAANQGQIWESANMASLWKLPMIFCIENNHYGMGTSMDRHSSHSDYYKMGNHIPGVRIDGMNVLAVKEGMRFVKDYVGNGNGPMYVEMMTYRYHGHSMSDPGTTYRNREEIALTRSTRDPLEFVKRTLVDAGFTDAEEIKEIEKRIRKDVANQVKQAKASSKPTVEPHLFEYVYSSDGGKEQNEFPPHIRMPDFAKSKNY	100	0	gi|223995699|ref|XP_002287523.1|	pyruvate dehydrogenase [Thalassiosira pseudonana CCMP1335]	51.55	4e-116	sp|Q6Z5N4|ODPA1_ORYSJ	Pyruvate dehydrogenase E1 component subunit alpha-1, mitochondrial OS=Oryza sativa subsp. japonica GN=Os02g0739600 PE=2 SV=1	297	2e-97	COG1071	TPP-dependent pyruvate or acetoin dehydrogenase subunit alpha	C	Energy production and conversion	K00161|1|2e-124|368|cme:CYME_CMT256C| pyruvate dehydrogenase E1 component alpha subunit [EC:1.2.4.1]	GO:0006096//glycolytic process;GO:0055114//oxidation-reduction process	GO:0004739//pyruvate dehydrogenase (acetyl-transferring) activity	GO:0043231//intracellular membrane-bounded organelle
200	XP_002288148.1	probable cysteinyl-trna synthetase, partial [Thalassiosira pseudonana CCMP1335]	53568.7	0.038	1	1	1.48	0.283	0.02923	XP_002288148.1	LTLYNSLTRSKTPFTPLRSPSVSMYTCGPTVYDSAHVGNFRAFLTYDVLKRVLLYLGYDVDHVCNLTDVDDKIIKRCEREGVSLIELTRKFEGKFFEDLEALNIIKAREYPRATEHIDEMAKLILDLERNGLAYQSEEGSWYFSVSKKEGYGTRLVQLDPEQLKIGASAQRGSLDADEYDTEKEGVRDFCLWKAYKPEFDREDATWDPDGVTRNIGRGRPGWHLECSAMARKYLGDTIDLHAGGVDLKFPHHENEIAQSEGANCAPFCNCWIHNGFVNIGDEKMSKSKGNFLTLRGACPTADDVRAYRYLVVSSQYRNPLSFTDAALGAAKGALKRLDKVKTLLDEALESSNDNSGDASAEKLTNFEVAIADDLSMPRASACLFSIVKAAEKEFKRVDK…	100	0	gi|223996950|ref|XP_002288148.1|	probable cysteinyl-trna synthetase [Thalassiosira pseudonana CCMP1335]	41.44	5e-104	sp|Q9PLE0|SYC_CHLMU	Cysteine--tRNA ligase OS=Chlamydia muridarum (strain MoPn / Nigg) GN=cysS PE=3 SV=1	346	3e-113	COG0215	Cysteinyl-tRNA synthetase	J	Translation, ribosomal structure and biogenesis	K01883|1|2e-129|387|ccp:CHC_T00009398001| cysteinyl-tRNA synthetase [EC:6.1.1.16]	GO:0006423//cysteinyl-tRNA aminoacylation	GO:0004817//cysteine-tRNA ligase activity;GO:0005524//ATP binding	GO:0005737//cytoplasm
201	EJK46530.1	hypothetical protein THAOC_34798 [Thalassiosira oceanica]	160620	0.008	1	1	1.49	0.194	0.008876	EJK46530.1	MAITALDTIVEAARLSKLTKIPCPQIYQEAPDIQLWDRTMVLLFDHRTCSVPCEWMDAIAGLFIPTGAVQNGYPIYARQSTIELIKSLPLSGLSYLEKYGIRLDTKGTFQQTRQLKLSVRTDSVLAIHQVMEATHVPANALALLTDPNELFTSTANLRSSQRRKRRKKKKKKKKKKKKDLPAEIAPKGSESTVMSAETSEEVGAVPYSKDSAEPDNKSMRKGSGDCDRGAASQKTKSAETDLLLLMKSRIASVLKLDEDRLPSSAMPILSACDTDLESWGATNVLDSLLGCAVDPAPPWLQLDEAVTSKVIKDAGADVAEWMKSNGSRLVSLFSNNSRYSDLESLLGFELVVSAKSVVHLLANLRKEKGNDLNNRVVRLLCGKSQIKLATKDEIKLVKK…	100	0	gi|397569089|gb|EJK46530.1|	hypothetical protein THAOC_34798 [Thalassiosira oceanica]	33.56	7e-35	sp|O15050|TRNK1_HUMAN	TPR and ankyrin repeat-containing protein 1 OS=Homo sapiens GN=TRANK1 PE=2 SV=4	93.2	4e-17	COG0457	Tetratricopeptide (TPR) repeat	R	General function prediction only	K10706|1|7e-27|124|aip:107626920| senataxin [EC:3.6.4.-]	-	-	-
202	XP_002289376.1	serine/threonine deaminase, partial [Thalassiosira pseudonana CCMP1335]	40087.5	0.029	1	1	1.3	0.167	0.02906	XP_002289376.1	FLTTPLIHSIPLSNLCAPHQVYLKLDLLQPSGSFKDRGMAHLCMTLKKVHTANRKQKQQLSPGGQDDGSGNTMKLISSSGGNAGLAVTTVARNIPDMEVSVIVPETTKPLVIEKLRSLGADVTVHGANWNLADDLARKLVKEHRDQDGDSALSGGAEYVSPYDNPLLWTGHSTVVDEIITQLIDTKHDVKVGAILASVGGGGLLCGILEGLERNYFGGSSVRSNVISGTKVVACETEGAASFAASKKGTTMVRLEGINSVATSLGALEVTPAVIHRSRRHQERGQIGGSGEDVLSYVCTDAEAVNACVQFSSHHRMLVEPACGAALAPLYSDRLRTKLLEELKSKGEESSAIVVEVCGGSGVNLDLLEGWKKQF	100	0	gi|223999407|ref|XP_002289376.1|	serine/threonine deaminase [Thalassiosira pseudonana CCMP1335]	36.56	5e-46	sp|B5VKE8|SDHL_YEAS6	L-serine dehydratase OS=Saccharomyces cerevisiae (strain AWRI1631) GN=SDL1 PE=3 SV=1	205	5e-62	COG1171	Threonine dehydratase	E	Amino acid transport and metabolism	K17989|1|3e-49|174|bpg:Bathy03g02060| L-serine/L-threonine ammonia-lyase [EC:4.3.1.17 4.3.1.19]	GO:0006520//cellular amino acid metabolic process	GO:0003941//L-serine ammonia-lyase activity;GO:0030170//pyridoxal phosphate binding	-
203	EJK77600.1	hypothetical protein THAOC_00555 [Thalassiosira oceanica]	53217.4	0.041	2	5	1.35	0.039	0.0002454	EJK77600.1	MTMHQQSGGRPTEAGSEAREERRQRSRRDVFDGVETTELLIEERSQPLSHKAGRRRPMTYPASSLRHLAMIAILLLFTIDTSVEAFTFVKPSRSSAVHIRGHHGITKRGDSIRGLECARSGRRIPGGTRRRASGALAMSSRSGPPPFPVRITVMGGGNFGLALASVVAKRGVPTTLLVRSDDVARSINEKHRHPTYMSDIALPRTVRATTNKASALGDATYIIHAVPVQYTRQFLRSVAEYIPPNVPVLSASKGIETSSLGFMADILRDCLGEDRSYAFLSGPSFAREICEGVATAVVIASEDIMLADDLAELMAGEDFAVFTSRDVIGIEVGGAVKNVIAIAAGMCEGLGLGTNALSGLVTRGCGEMRRLGIYLGARPSTISGLSGVGDTFGTCFGPL…	100	0	gi|397647202|gb|EJK77600.1|	hypothetical protein THAOC_00555 [Thalassiosira oceanica]	44.44	1e-92	sp|Q949Q0|GPDA2_ARATH	Glycerol-3-phosphate dehydrogenase [NAD(+)] 2, chloroplastic OS=Arabidopsis thaliana GN=GLY1 PE=1 SV=1	250	2e-77	COG0240	Glycerol-3-phosphate dehydrogenase	C	Energy production and conversion	K00006|1|3e-120|361|ccp:CHC_T00008461001| glycerol-3-phosphate dehydrogenase (NAD+) [EC:1.1.1.8]	GO:0055114//oxidation-reduction process;GO:0045017//glycerolipid biosynthetic process;GO:0048573//photoperiodism, flowering;GO:0019243//methylglyoxal catabolic process to D-lactate;GO:0005975//carbohydrate metabolic process;GO:0009627//systemic acquired resistance;GO:0046167//glycerol-3-phosphate biosynthetic process;GO:0046168//glycerol-3-phosphate catabolic process;GO:0048653//anther developmen…	GO:0008800//beta-lactamase activity;GO:0051287//NAD binding;GO:0046872//metal ion binding;GO:0004367//glycerol-3-phosphate dehydrogenase [NAD+] activity;GO:0047952//glycerol-3-phosphate dehydrogenase [NAD(P)+] activity;GO:0004416//hydroxyacylglutathione hydrolase activity	GO:0009331//glycerol-3-phosphate dehydrogenase complex;GO:0009941//chloroplast envelope
204	XP_002288542.1	predicted protein [Thalassiosira pseudonana CCMP1335]	51791.8	0.076	1	1	1.51	0.135	0.002788	XP_002288542.1	MRTLSAAVTAVLFAPQMTTSFSVLPSSTQCHATSSLSAMTFDVDAEKNQLTVTPIATLEGTVTLPGSKSLSNRCLLLAALSSGNTRVENLLESDDIRYMLEALDTLKVPVERDAIDKTSVTVTGQAGPINSPTPEEVVELFLGNAGTAMRPLAAALCMGEGKFVLDGVPRMRERPISDLIDGLKQLGADVSCVEETGCPPVTINASGLKGGKASISGKMSSQFLSSLLMASPAVDGDVTISIKDELISAPYVSLTIGLMKKFGVNVKIEGDMDGTPSFIIGADEKYTSPESILVEGDASSASYFLAGAAITGGTVTVRGCGSDSVQGDVAFANVMEQMGATVTWAPESITITRDPNTKLKGVDVDCGKIPDAAMTLAVAALFAEGPTTIRNVYSWRLKE…	100	0	gi|223997738|ref|XP_002288542.1|	predicted protein [Thalassiosira pseudonana CCMP1335]	57.3	5e-160	sp|P05466|AROA_ARATH	3-phosphoshikimate 1-carboxyvinyltransferase, chloroplastic OS=Arabidopsis thaliana GN=At2g45300 PE=2 SV=3	468	2e-161	COG0128	5-enolpyruvylshikimate-3-phosphate synthase	E	Amino acid transport and metabolism	K00800|1|0.0|534|ccp:CHC_T00009255001| 3-phosphoshikimate 1-carboxyvinyltransferase [EC:2.5.1.19]	GO:0009073//aromatic amino acid family biosynthetic process	GO:0003866//3-phosphoshikimate 1-carboxyvinyltransferase activity	GO:0005737//cytoplasm
205	EJK47224.1	hypothetical protein THAOC_34076 [Thalassiosira oceanica]	66268.2	0.099	4	8	1.35	0.134	0.009472	EJK47224.1	MGRANHSESPVPKRPPAGATATASAGLASSSLLAEAWKPMFPGMVHDGRLEGRICARVVRERSPAFPVARGLSPIQSREYAKHQRQLVDGSIESTSSLDWPQHHPTNDTHFHFPPIPIDIMADEFDLHICCMGAGYVGGPTMAVIAAKCPKVRVCVVDLSQKQIDAWNSPDLPIYEPGLPEVVAQCLGKNLFFSTDIDAEIKKADIVFISVNTPTKTMGIGAGRAANVKNCELCARKIAEVSESDKIVVEKSTVPVRTAQAVRRVLDCNERGLKFQVLSNPEFLAEGTAIPDLMSPDRVLIGGVQTPEGIAAAEKLAGVYANWVPREQILTTNLWSSELSKLVANAFLAQRVSSINSISALCEATGANVSEVSRCVGMDDRIGKRFLNSSIGFGGSCFQ…	100	0	gi|397570273|gb|EJK47224.1|	hypothetical protein THAOC_34076 [Thalassiosira oceanica]	62.68	0	sp|Q9LF33|UGDH3_ARATH	UDP-glucose 6-dehydrogenase 3 OS=Arabidopsis thaliana GN=UGD3 PE=1 SV=1	624	0	COG1004	UDP-glucose 6-dehydrogenase	M	Cell wall/membrane/envelope biogenesis	K00012|1|0.0|625|crb:CARUB_v10000855mg| UDPglucose 6-dehydrogenase [EC:1.1.1.22]	GO:0055114//oxidation-reduction process	GO:0051287//NAD binding;GO:0003979//UDP-glucose 6-dehydrogenase activity	-
206	EJK59460.1	hypothetical protein THAOC_20317 [Thalassiosira oceanica]	40503.3	0.067	7	20	1.51	0.281	0.02303	EJK59460.1	MKTVSLALLPLAAAFSTLSPSPLAPAQHTSALRMSDGFDETRGGTYSMADQVARFARAKAENNERYLNIDSVFDGGDLSGKRVLVTGGNRGLGLAIVKELVAIGATAIVVCRSSSTEVERLVGKWNVYDGVDVTDDEAVLKVAKRVKGDGGALDVVINNAGYFYGPCELVKEGTLNFEEQMKQIDVCALGPLRMNNALVQSKALAEGCKLVIITSQAGSVEWRSTQNKGTGGDYGHHMSRAACNMAAKLLSEEVKDMGYAVLMLHPGFNRTEMTAKYKEIWDIEGAVPAEEGAKRVLYEVIRNGMEQTGQFINCEDGLLIPCTADKDGIAARRQETSLNRSLQDSNSNSNTPSQSATRDAAETLWRRRQDR	100	0	gi|397606839|gb|EJK59460.1|	hypothetical protein THAOC_20317 [Thalassiosira oceanica]	27.88	6e-15	sp|P21158|CSGA_MYXXA	C-factor OS=Myxococcus xanthus GN=csgA PE=1 SV=1	131	8e-35	COG0300	Short-chain dehydrogenase	R	General function prediction only	K00079|1|5e-11|66.6|spen:107013752| carbonyl reductase 1 [EC:1.1.1.184 1.1.1.189 1.1.1.197]!K15095|2|6e-11|66.6|pper:PRUPE_ppa009560mg| (+)-neomenthol dehydrogenase [EC:1.1.1.208]	GO:0055114//oxidation-reduction process	GO:0016491//oxidoreductase activity;GO:0000166//nucleotide binding	-
207	EJK49309.1	hypothetical protein THAOC_31830 [Thalassiosira oceanica]	65064.7	0.091	12	79	1.91	0.33	0.005774	EJK49309.1	MENRIDLAFTASACDMEALSDTFGQLDGEFQSESSKFALIGVAHNSQSFIHPMNKMVLFALLALLFGGADAFVPPPRISVTAPSTSKISAAAGITDYLSSLDSNPQAQSVSELLTTANFKSSQRWRKRTKQLATLGPASSSFEMIEKLFLAGADVFRLNFSHGEYDQKQELYDIIRAVEAKYDHPIAILGDLQGPKLRVGTFANPDGEMLERGQIFRFDLDETPGTNKRVMLPHPEIIEASEVGHDLLIDDGKVKVTVVATGPGYLDCEVIVPGKIKDKKGVNTPDSILEISCLTPKDRADLNFMLDLGVDWIALSFVQRPEDIVEMKGLIMSHNPNNAFPPHIMAKIEKPSCFEGDSLERIVELCDGIMVARGDLGVECAPEDVPILQKTIIEECRHQ…	100	0	gi|397574638|gb|EJK49309.1|	hypothetical protein THAOC_31830 [Thalassiosira oceanica]	47.86	4e-128	sp|P70789|KPYK1_AGRVI	Pyruvate kinase OS=Agrobacterium vitis GN=ttuE PE=2 SV=1	457	1e-154	COG0469	Pyruvate kinase	G	Carbohydrate transport and metabolism	K00873|1|5e-78|259|gsl:Gasu_48930| pyruvate kinase [EC:2.7.1.40]	GO:0044237//cellular metabolic process	GO:0016301//kinase activity;GO:0046872//metal ion binding	-
208	XP_002287527.1	probable RabGDI [Thalassiosira pseudonana CCMP1335]	50090.7	0.215	1	1	1.29	0.134	0.01733	XP_002287527.1	MEPLADGEYDAIIMGTGLKECVISGLLSVQGMRVLQMDRNDYYGADCASLNLTNLYKKFNAGDAPDSLGANRDFNVDLIPKFIMACGNLTKMLLHTKVTRYLEFKSIEGSFVYKGGKILKVPATPEEALRSPLMGLFEKRRFRNFLLFVDQYDNSKPETHKDKDLTTMTMKQLYESFGLVPDTHQFISHAMCLKLDEAHMDQPALETVKELQTYCYSLARYGTSPYIYPVYGLGGLPEGFSRLCAIHGGTFMLNRDVDEIVYNDAGEAIGVKSGNEMARAKFVVGDPSYFPKEKVRPTGQIVRCICFLNHPIPNCGDLESVQIIIPGPQVGRKNDIFVCSLSSSHQVSARGVYVAIVSTKMEGEDADKEVIPGLALLGHIMQRFTMVATTYEPVSDGHS…	100	0	gi|223995707|ref|XP_002287527.1|	probable RabGDI [Thalassiosira pseudonana CCMP1335]	56.18	5e-176	sp|Q10305|GDI1_SCHPO	Probable secretory pathway GDP dissociation inhibitor 1 OS=Schizosaccharomyces pombe (strain 972 / ATCC 24843) GN=gdi1 PE=3 SV=1	-	-	-	-	-	-	K17255|1|2e-173|497|ccp:CHC_T00009036001| Rab GDP dissociation inhibitor	GO:0015031//protein transport	GO:0005093//Rab GDP-dissociation inhibitor activity;GO:0003824//catalytic activity	-
209	EED93536.1	vacuolar ATPase [Thalassiosira pseudonana CCMP1335]	56066.7	0.322	3	14	1.27	0.055	0.001697	EED93536.1	MASHADERFIPERKKLDQLSVVKDYSVVPRLEYRTIAGVNGPLVILDNVKLPKYAEIVNLTLGDGTTRSGQVLEVSGSRAVVQVFEGTSDIDNRKTRCEFTGDVLKMGVSEEMLGRSFNGSGKVIDNAPKVLPEAYLDINGQPINPSARDYPKAMIQTGISAIDVMNSVARGQKIPIFSAAGLPHNEVAAQIARQASLVKLKDTTDSHEENFAIVFGAMGVNMETARFFRSDFEESGAMQRTALFLNLANDPTIERIITPRLALTTAEYLAYERDLHVLVILTDMSSYADALREVSAAREEVPGRRGYPGYMYTDLSTIYERAGRVVGRNGSITQLPILTMPNDDITHPIPDLTGYITEGQIYLDRQLHTKGIFPPINVLPSLSRLMKSAIGEGMTRDD…	100	0	gi|224000653|ref|XP_002289999.1|	vacuolar ATPase [Thalassiosira pseudonana CCMP1335]	77	0	sp|Q5R5V5|VATB2_PONAB	V-type proton ATPase subunit B, brain isoform OS=Pongo abelii GN=ATP6V1B2 PE=2 SV=1	585	0	COG1156	Archaeal/vacuolar-type H+-ATPase subunit B/Vma2	C	Energy production and conversion	K02147|1|0.0|769|ccp:CHC_T00004901001| V-type H+-transporting ATPase subunit B	GO:0042777//plasma membrane ATP synthesis coupled proton transport;GO:0006200//ATP catabolic process;GO:0015991//ATP hydrolysis coupled proton transport	GO:0008553//hydrogen-exporting ATPase activity, phosphorylative mechanism;GO:0046933//proton-transporting ATP synthase activity, rotational mechanism;GO:0005524//ATP binding;GO:0046961//proton-transporting ATPase activity, rotational mechanism	GO:0033180//proton-transporting V-type ATPase, V1 domain
210	EED95896.1	adenine nucleotide translocator; ATP/ADP translocase [Thalassiosira pseudonana CCMP1335]	32500.6	0.245	2	2	0.49	0.167	0.02309	EED95896.1	MSDFMINFLAGGVSGAVAKTCTAPIERVKLLIQTQDANPKIISGEVARYTGIVDCFSRVASEQGIGAFWRGNLTNIIRYFPTQAFNFAFKDGIKALFPRADKNTEFAKFFAINMASGGLAGAGSLMIVYPLDYARTRLASDVGSGKQQFSGLADCLKKTVASSGIGGLYNGIGVSIVGIIPYRGVYFGLFDTLSGLNPYQKDTNNMLRAGSKFACAQSSAIAAGYASYPMDTVRRRLQMQSEKPKEEWVYKGTADCFAKIMKDEGTSALFKGAGANALRTVGAAMVLVLYSEITAAVAASKE	100	0	gi|223993143|ref|XP_002286255.1|	adenine nucleotide translocator; ATP/ADP translocase [Thalassiosira pseudonana CCMP1335]	60.48	2e-112	sp|P31692|ADT_PARKE	ADP,ATP carrier protein OS=Parachlorella kessleri PE=3 SV=1	-	-	-	-	-	-	K05863|1|7e-115|337|mis:MICPUN_108589| solute carrier family 25 (mitochondrial adenine nucleotide translocator), member 4/5/6/31	GO:0055085//transmembrane transport	GO:0005215//transporter activity	GO:0005743//mitochondrial inner membrane;GO:0016021//integral component of membrane
211	EJK47915.1	hypothetical protein THAOC_33329 [Thalassiosira oceanica]	37050.3	0.032	6	10	1.56	0.373	0.04006	EJK47915.1	MSSSKDTLLEIAAQFKAGDVLDNMKKPAGGVIVIESKMTPLEAARLLWENNIMGAPVYNVEANKFVGMFDTRDILSCIVAAHREFISMGGKHSSGEDTVLPHEVNMQEQHRLVEKALQAMKIDSKPGTAGAITVTYLAARNPLGPEITKDTPLVDVLKALADRNRHRVVLPGAGNVCNGIISQSGLITFIASKLPKGSLLESIEDAGLPYRKDVVQINEDEKASEAFTVIDKKRLSGIAVVDSEGKLIGNTSARDVKFAAMDRNCQVSLDLDIISYLAAVRQAVAENERSPVCKVRPEDTMEHVIKLLAKTGYHRVFVVDGNAKPVGVISFADIINYILS	100	0	gi|397571688|gb|EJK47915.1|	hypothetical protein THAOC_33329 [Thalassiosira oceanica]	25	4e-11	sp|Q5A744|SDS24_CANAL	Protein SDS23 OS=Candida albicans (strain SC5314 / ATCC MYA-2876) GN=SDS24 PE=2 SV=2	55.1	1e-07	COG0517	CBS domain	T	Signal transduction mechanisms	K07200|1|4e-08|58.5|smo:SELMODRAFT_161836| 5'-AMP-activated protein kinase, regulatory gamma subunit	-	-	-
212	EJK77607.1	hypothetical protein THAOC_00549 [Thalassiosira oceanica]	23798.3	0.18	1	1	2.14	0.201	0.0005549	EJK77607.1	MCEHGSVDTTLSDSDFDLLPFAQRTQKSAEKKLTQSFLFRLVLNAEASRMEFLQQSAAAVAAFTMLPGQANAAKYGGFGAGSPEVIDPKDALVDEDILKSEPVQKALEAVKGYKQSTVDLKTVLSSDNQADIGAKIRKDFDFSVIRTDLNAINAALDEDTQRGTDRIVRAILQDITELEVSQKQKPGVPRSEKRLGNVIGKLDKLEKSFDDYLAFAN	100	5e-146	gi|397647215|gb|EJK77607.1|	hypothetical protein THAOC_00549 [Thalassiosira oceanica]	-	-	-	-	-	-	-	-	-	-	-	GO:0006810//transport	-	-
213	EED87904.1	predicted protein [Thalassiosira pseudonana CCMP1335]	46556.7	0.058	1	1	1.41	0.099	0.002271	EED87904.1	MMHPHRVLAVLLILPTALGFLSPSLNTPPSSKVALFNHANNNNNEVDRRSAVRVGGLTLASLLLPLAANTSPAEAAERFNDDPKQRILITGSNSGIGLDAAQRLALRGHEVVLACRTLDKAIAAADKIKTNIANDSEDAVDAIALIKTLKLTPMECDLADLKSIDSFVNELKKTSSGEEGRMMFDAVCYNAGLSRNTAATDVLRTKQGFELTVGTNHFGHFYLNHLMMPLIKKDGGRMVVTASGVHDPDSPGGAQGIPATLGDLAGLEQAVARGDGKFDMVDGGEFNADKAYKDSKLCNVLFTRELQRRLKESGSNVKVNCFNPGLIVGTGLFRDQNQVFTKVFDVAATSLFKVGETTHWGGGALEYMALSSEVANERGGLFYTAPPGSSKYGDDAFGR…	100	0	gi|224011782|ref|XP_002294544.1|	predicted protein [Thalassiosira pseudonana CCMP1335]	34.32	8e-43	sp|O66148|POR_LEPBY	Light-dependent protochlorophyllide reductase OS=Leptolyngbya boryana GN=por PE=3 SV=2	188	2e-54	COG1028	NAD(P)-dependent dehydrogenase, short-chain alcohol dehydrogenase family	IQR	Lipid transport and metabolism;Secondary metabolites biosynthesis, transport and catabolism;General function prediction only	K00218|1|3e-73|236|olu:OSTLU_4520| protochlorophyllide reductase [EC:1.3.1.33]	GO:0055114//oxidation-reduction process	GO:0016491//oxidoreductase activity;GO:0000166//nucleotide binding	-
214	EED94317.1	serine threonine protein phosphatase [Thalassiosira pseudonana CCMP1335]	37144.2	0.305	2	8	1.36	0.141	0.01006	EED94317.1	MMRNNNAPPDESWIDGIIDNLLSARNKKPGTPVDISVQDATNLCNQAREVLLSQPMLLELGAPIKICGDIHGQYTDLLRLFEYGGFPPEANYLFLGDYVDRGKQSLEVVCLLFAYKIKYPENFFILRGNHECAGINRIYGFYDEFRRRFSVKLWKAFCNTFNCLPCTAVIDDKIICMHGGLSPELSQMEQIANIARPCDVPDTGLLCDILWADPDPSITGWNENDRGVSFTFGGDVVRQFLRRHDLDLVVRAHQVVEDGYEFFAGRELVTVFSAPNYCGEFDNAGAMMTVDDTLMCSFQILKPASAQQQRSGYGRPGTPGRPQGR	100	0	gi|223998416|ref|XP_002288881.1|	serine threonine protein phosphatase [Thalassiosira pseudonana CCMP1335]	73.15	1e-169	sp|P48480|PP11_ACEPE	Serine/threonine-protein phosphatase PP1 isozyme 1 OS=Acetabularia peniculus PE=3 SV=1	154	2e-43	COG0639	Diadenosine tetraphosphatase ApaH/serine/threonine protein phosphatase, PP2A family	T	Signal transduction mechanisms	K06269|1|7e-170|477|csl:COCSUDRAFT_30972| serine/threonine-protein phosphatase PP1 catalytic subunit [EC:3.1.3.16]		GO:0046872//metal ion binding;GO:0004721//phosphoprotein phosphatase activity	-
215	XP_002287312.1	signal recognition particle 54 kDA subunit [Thalassiosira pseudonana CCMP1335]	52147.6	0.021	1	1	1.24	0.103	0.01445	XP_002287312.1	MFDQLSNALTEVAKNFGGKQRMTENSIQPALKSVRRALLDADVNLDVATALIDGVKRRSLGKEVTKGVTAEQQFIKAMYDELLDMMGGEANESNTMATLAHSSVANEPAVILLAGLQGAGKTTAAGKLAFRLPKRNRKVLLVAADVYRPAAIEQLQILGKQIGVEVFSMGVDADPADIAKEAVEKAKREGFDTVVVDTAGRQVVDEELMEELRRVKKTVEPDETLLVVDAMTGQAAASLTASFDAAVGISGAILTKLDGDSRGGAAVSIRGVSGKPIKFVGVGEKTNDLEPFYPDRMASRILGMGDVISLVEKASMEVSDADAAKMQEKMAKAEFDFDDFMTQSRMVSKMGSMAGVAKMLPGMGNMIDSSQMRQVEERIKRSEAMICSMNKKERANPGL…	100	0	gi|223995257|ref|XP_002287312.1|	signal recognition particle 54 kDA subunit [Thalassiosira pseudonana CCMP1335]	53.9	8e-130	sp|P74214|SRP54_SYNY3	Signal recognition particle protein OS=Synechocystis sp. (strain PCC 6803 / Kazusa) GN=ffh PE=3 SV=1	478	7e-165	COG0541	Signal recognition particle GTPase	U	Intracellular trafficking, secretion, and vesicular transport	K03106|1|2e-125|381|cme:CYME_CMC066C| signal recognition particle subunit SRP54 [EC:3.6.5.4]	GO:0006614//SRP-dependent cotranslational protein targeting to membrane	GO:0017111//nucleoside-triphosphatase activity;GO:0008312//7S RNA binding;GO:0005525//GTP binding	GO:0048500//signal recognition particle;GO:0009536//plastid
216	XP_002291658.1	predicted protein [Thalassiosira pseudonana CCMP1335]	100125	0.014	1	3	1.32	0.152	0.01841	XP_002291658.1	MLFCSACFIGISGVVPMFLCRETTVFTVDEIQARDRTEDWTVIFGTIYDIKSYISLHPGGDQITSIIGKDASKYFPRRPVGLLPDSCMNPEVELTTEAVCEEFDEVDLLMNMHCHSAVGFSGIKRSFGEYERGILAHRASNLKNDPHTDYVMIYNRIYNVTRYIDGITNERTREIEADSENAYLNEDLTSLIINKRGQDATAVYEALYRDDVALSCLDDLFYIGVLDEPEDILCRVLNYAMYAIMIAIAGVLAVQCLCSLIYLVRMKRTITRDDTRTKVIVMVPCYNEGDKELRKTIDSVMDTSYPDDNKVLFVVADGNITGKGERKSTPETLSQILGYNINSNDKSYKCKSIGDLTENRAKLYYGTYKDCGKELKYIVIVKCGVASEKGSPRAGNRGK…	100	0	gi|224003973|ref|XP_002291658.1|	predicted protein [Thalassiosira pseudonana CCMP1335]	36.23	5e-134	sp|O13395|CHS6_USTMA	Chitin synthase 6 OS=Ustilago maydis (strain 521 / FGSC 9021) GN=CHS6 PE=3 SV=2	91.7	1e-17	COG1215	Glycosyltransferase, catalytic subunit of cellulose synthase and poly-beta-1,6-N-acetylglucosamine synthase	N	Cell motility	K00698|1|1e-14|82.4|cvr:CHLNCDRAFT_142547| chitin synthase [EC:2.4.1.16]		GO:0020037//heme binding;GO:0016758//transferase activity, transferring hexosyl groups;GO:0046872//metal ion binding	-
217	EED89294.1	predicted protein, partial [Thalassiosira pseudonana CCMP1335]	28285.7	0.12	1	2	1.35	0.219	0.03409	EED89294.1	QLAWHCAGTYSKEDGSGGSNGARMRFNPEASWGANAGLDLPRKVLESVKEKHPDISYADLYTLSGVVAVEEAGGPKIPFRLGRTDADSGETSPKTCGLPDADKGSRANTTQHVRDVFYRMGFNDREIVALLGAHALGRCHTDRSGYWGPWTFAENTFSNEYFRLLVEERWSPKMSHNGKPWEGPDQYEDSTGKLMMLPSDMILVQDPTFKKIVELYAKDEDAFFKDFASAFSKLLELGVDFPSTKPWYQFW	100	1e-174	gi|224009199|ref|XP_002293558.1|	predicted protein [Thalassiosira pseudonana CCMP1335]	58.61	8e-82	sp|Q4WPF8|CCPR_ASPFU	Cytochrome c peroxidase, mitochondrial OS=Neosartorya fumigata (strain ATCC MYA-4609 / Af293 / CBS 101355 / FGSC A1100) GN=ccp1 PE=3 SV=1	113	1e-26	COG0376	Catalase (peroxidase I)	P	Inorganic ion transport and metabolism	K00428|1|2e-89|271|csl:COCSUDRAFT_29785| cytochrome c peroxidase [EC:1.11.1.5]	GO:0055114//oxidation-reduction process;GO:0006979//response to oxidative stress	GO:0020037//heme binding;GO:0004601//peroxidase activity	-
218	EJK68036.1	hypothetical protein THAOC_10832, partial [Thalassiosira oceanica]	164781	0.01	1	4	1.69	0.07	0.0001316	EJK68036.1	IFANGDDSLADAIKVGLRLRGISGSYVLNKQSQAVNMILGHCTDVDASCTKGQLPIALARTVLQVFIFNLLPELQQANAGLAAVAILDDDKRLGQGWSPFSGRRACIQIGRDCRTPPNPSLFSLRTNLIDLLHSLDLLHSQDGSANDFCIASEHYESRDTFDWYYDMSTSNYSHLELPVYSELAVSREPEPAMDGSFANDDASGEKGVNKLRDYDKLYRDFLIGTPLCRDVIPPLEGGRTSQRGGCMVLIDDFTPLAVQQHAPLIRFSDGSTSYTRRSDSLWCQVLASAGHVVEVNPRLFCYHDNRFDAISSPENIRKNIVQEVLGGILCREPKLRDRYKRMRLIQLEFWLHRVNGLLASLRNRPYFTEQMDEQLLQPLEKILNINKWRDEVFRVLQSN…	100	0	gi|397626120|gb|EJK68036.1|	hypothetical protein THAOC_10832, partial [Thalassiosira oceanica]	41.98	2e-27	sp|P47924|RIBA1_ARATH	Bifunctional riboflavin biosynthesis protein RIBA 1, chloroplastic OS=Arabidopsis thaliana GN=RIBA1 PE=1 SV=2	122	2e-29	COG0807	GTP cyclohydrolase II	H	Coenzyme transport and metabolism	K14652|1|2e-30|122|mdm:103443270| 3,4-dihydroxy 2-butanone 4-phosphate synthase / GTP cyclohydrolase II [EC:4.1.99.12 3.5.4.25]	-	-	-
219	XP_002289996.1	aliphatic amidase [Thalassiosira pseudonana CCMP1335]	40372.5	0.045	2	3	1.6	0.255	0.01083	XP_002289996.1	MSRHGDISSSPDTVGVCVFQYPMPRLHTEEEVMANAKKICDIVKGTKMGLPGMDLIVFPEYSTMGIMYDRQEMFDTACAIPGPLTDMFGEACKEAGVWGVFSLTGEQHEQHPKKNPYNTLVLINDKGEIVQKYRKLLPWTPIEGWTPGNLGTLVADGPKGLKVSMIICDDGNYPEIWRDCAMKGAELIIRPQGYMYPAKDQQVQVSKTMAWCNQVYVAVANASGFDGVYTYFGHSAIIGADGRTLGECGTEDNGIQYAQLSISGIRDARANDQSQNQLFKLTHRGYTGVYANGDGEKGIAECPFEWYKTWVTNPKEAQRMAENVTRRTIGVACCPVAGIPPPREEEEELLEMTREIDLS	100	0	gi|224000647|ref|XP_002289996.1|	aliphatic amidase [Thalassiosira pseudonana CCMP1335]	71.6	0	sp|Q9RQ17|AMIE_GEOSE	Aliphatic amidase OS=Geobacillus stearothermophilus PE=1 SV=1	531	0	COG0388	Predicted amidohydrolase	R	General function prediction only	K12251|1|2e-11|67.8|cre:CHLREDRAFT_116571| N-carbamoylputrescine amidase [EC:3.5.1.53]!K13566|5|3e-07|55.5|bvg:104889412| omega-amidase [EC:3.5.1.3]	GO:0006807//nitrogen compound metabolic process	GO:0004040//amidase activity	-
220	XP_002286724.1	prephenate dehydratase, partial [Thalassiosira pseudonana CCMP1335]	34625.5	0.039	1	1	1.33	0.147	0.01564	XP_002286724.1	KSTTSPKPIRVAFQGEAGAYSEKSLRELLGPNVISVPRPNFEACYRAVASKEVDYACVPIENSLGGSIHENYDLMLRYDLTIVAEHDFRVRHCLLTKHGVEEKDIKYAISHSQALSQCDNYLRARGITPKATYDTAGSAKIISKAIRGEAFGRQLPEGCTPENTAAIASDLAGQTFGLECKAEGIEDDDSNFTRFLLLGRTGVVQHLNKKIPSKTSLVFTLPNSAGALYKSLACFSLREIDMSKIESRPMSTASSRVKDMPRFRYCFYLDILESELDERVQNALHHLREQSDYCRILGSYPANSRLV	100	0	gi|223994081|ref|XP_002286724.1|	prephenate dehydratase [Thalassiosira pseudonana CCMP1335]	44.16	3e-71	sp|Q9SSE7|AROD2_ARATH	Arogenate dehydratase/prephenate dehydratase 2, chloroplastic OS=Arabidopsis thaliana GN=ADT2 PE=1 SV=1	231	2e-73	COG0077	Prephenate dehydratase	E	Amino acid transport and metabolism	K05359|1|1e-77|245|gra:105799316| arogenate/prephenate dehydratase [EC:4.2.1.91 4.2.1.51]	GO:0009094//L-phenylalanine biosynthetic process	GO:0097159//organic cyclic compound binding;GO:0016740//transferase activity;GO:0004664//prephenate dehydratase activity;GO:1901363//heterocyclic compound binding;GO:0036094//small molecule binding	-
221	EJK61433.1	hypothetical protein THAOC_18078 [Thalassiosira oceanica]	13232.5	0.136	1	1	1.56	0.305	0.02718	EJK61433.1	MSAASVPLANGAMSFDRVCREWRCKYTGDKATSESLEAISKLVDEYLPEIKSSSADAKVNRLVCGSCLDFKLMTTVPLDDFGPWEEKAFAPEAEFLEKLKAIEGVSQVETQTITNMEI	100	5e-83	gi|397611688|gb|EJK61433.1|	hypothetical protein THAOC_18078 [Thalassiosira oceanica]	-	-	-	-	-	-	-	-	-	-	-	-	-	-
222	EED91176.1	ctp-synthetase [Thalassiosira pseudonana CCMP1335]	71547.5	0.028	2	2	1.29	0.15	0.02435	EED91176.1	MRRHRHPERRREISYPLLFVWCTLLLAIPPVHPFLLPLHFTSASPTTISSTPTKTSNIVSPRGPLRSHLPPTLESLVTDTLDADRKIIIVTGGVLSGIGKGVTASSIGVLFRAMGYRVTALKIDPYLNVDAGTMSPFEHGEVFVLDDGGETDLDLGNYERFLSVSLTKDSNLSTGKIYQSVIERERIGEYLGKTVQVVPHISDAIQEWVLKVAKTPEEPPEVCIVELGGTLGDIESMPFVEALRQLQENLGYKNLCFVHVSLVPVLGDPPEQKTKPTQHSVKQMMQMGLRPDFLCCRGSAALEPSSVSKLSLFTSVPKGAIVSLHDVSNIYRVPLMMMEQNVHAMLMHRLRMDPYERVIRDWKKLADSVDEPESECVIAVVGKYVDHGDAYLSVVKALT…	100	0	gi|224002795|ref|XP_002291069.1|	ctp-synthetase [Thalassiosira pseudonana CCMP1335]	53.44	0	sp|Q54V77|PYRG_DICDI	CTP synthase OS=Dictyostelium discoideum GN=ctps PE=3 SV=1	561	0	COG0504	CTP synthase (UTP-ammonia lyase)	F	Nucleotide transport and metabolism	K01937|1|0.0|618|vcn:VOLCADRAFT_84560| CTP synthase [EC:6.3.4.2]	GO:0006541//glutamine metabolic process;GO:0006221//pyrimidine nucleotide biosynthetic process	GO:0003883//CTP synthase activity	-
223	EJK44003.1	hypothetical protein THAOC_37500 [Thalassiosira oceanica]	65348.4	0.017	1	2	1.85	0.391	0.01125	EJK44003.1	MSNKSSARLRPPMSGMTAVALLLLVACLSAHVATAFTACSSSRRSRGSAPSAPSLRRGARVELGVSPSVPAEDVTASAEKIKRLQTLADLANEAIEEHGSEVLKTFNARVGVILPSGDDEAQGKFLRLGLVATGSASKGDLVASLPFNEGDGSGLALEPNFAAKIVYDKVLPEGYDGWTGDVGLLAMLLLNEMARQDADSPKGVDLPRRKEGVQALMSAWIASLPSFEEMTEMHPLLWNEDEQEIMQLSSTKKIYRLLDDIEDDSSWLDENVWSADREKFPETVKIRVGDADEERQCFTVDGFRYAVAVVRSRSFFVDGALRLLPYVDYANHDDYDSNELVGGGIGMLWGSSKGVLLKSGKALRVGDEVRISYGPKGPADYILDHGFVPPMCQLSTQGG…	100	0	gi|397563943|gb|EJK44003.1|	hypothetical protein THAOC_37500 [Thalassiosira oceanica]	30.38	8e-33	sp|P94026|RBCMT_TOBAC	Ribulose-1,5 bisphosphate carboxylase/oxygenase large subunit N-methyltransferase, chloroplastic OS=Nicotiana tabacum GN=RBCMT PE=2 SV=1	-	-	-	-	-	-	K00592|1|7e-40|152|obr:102703061| [ribulose-bisphosphate carboxylase]-lysine N-methyltransferase [EC:2.1.1.127]	-	-	-
224	XP_002290122.1	predicted protein [Thalassiosira pseudonana CCMP1335]	56275.1	0.026	4	6	1.45	0.128	0.003875	XP_002290122.1	MMISTKLSLLFIGIASSINAQQVVDKSLPLDAVHVASSAVDLKNTSTMKQSSTGNAEFAVLAHSLLIGATSDAEESSFYDLSVITEHEYLIAILHFFSTNDNPTQTLNTNDTIQKTNLMNTINTLKENSNDIDWERIHSEYNTISQHLESKSTTQQSSSTYTPDQSHRNLRAAIDGDLFHGYEYSKGRCPRKGSIGVPCAPNNLDRICNKYSLVGSFQRCIDACAPALCCIHSANPRKNDVAPNCNRDEHCGGYNYCYIAWWKLHDTVGPASFLRLEQDDDFYDVKDDKYDANNIDDDFQGQLFYHHFNDIEPIIEEGSLNNGKLVSSEVFGNENYWYGDDRIPTTNKYLEQFSATNNNDMLEKSSTDESTSAASASTSLVDATTDDEVEKELTETQKL…	100	0	gi|224000900|ref|XP_002290122.1|	predicted protein [Thalassiosira pseudonana CCMP1335]	-	-	-	-	-	-	-	-	-	-	-	-	-	-
225	EED90805.1	predicted protein, partial [Thalassiosira pseudonana CCMP1335]	20651.5	0.126	3	12	1.56	0.316	0.02531	EED90805.1	KKHMLKLVILGDSGVGKTSLMNRYHSNKFTGQYKATIGADFLSKHVSITDPQTGSIRNVTLQIWDTAGQERFQSLGVAFYRGADAVALVYDVGDAKSFDHLENWRGEFLKQVGLDERGGGGGAGFPFVLLGNKIDRPEGERRVPRQLAEEWCERAGLGGEMGGGPIPHFEVSAKTSDNVEGAFLELATLA	100	2e-125	gi|224005987|ref|XP_002291954.1|	predicted protein [Thalassiosira pseudonana CCMP1335]	55.74	6e-63	sp|P36864|YPTV5_VOLCA	GTP-binding protein yptV5 OS=Volvox carteri GN=YPTV5 PE=3 SV=1	80.1	2e-17	COG1100	GTPase SAR1 family domain	R	General function prediction only	K07897|1|1e-63|198|obr:102699784| Ras-related protein Rab-7A	GO:0007264//small GTPase mediated signal transduction;GO:0015031//protein transport	GO:0005525//GTP binding	-
226	EJK71319.1	hypothetical protein THAOC_07260 [Thalassiosira oceanica]	28136.7	0.041	1	3	1.3	0.151	0.02299	EJK71319.1	MDLCLPSKPAPEFSYEHQGKRHYITPPPGNIHGEQFLMVAGDSEGYKVRCEITVNSQQYMDYLDIMVKPYWAPRAASRFLELVRQKYYDGVAFNRVVPHGLTQFGIARDFATRTKERELTIWDDFPKGIKFEPGYMSFAGSGHDSRTTEIFIVNPGVSEAQLRMFGENSWETPFATVLDVDNSALRKIYSGYGDMPHFGGRGPDSARIYEEHGYTYLSKEFPKLDYIDRCYVVDEVGLSDLSAGDL	100	0	gi|397634173|gb|EJK71319.1|	hypothetical protein THAOC_07260 [Thalassiosira oceanica]	-	-	-	-	87	4e-19	COG0652	Peptidyl-prolyl cis-trans isomerase (rotamase) - cyclophilin family	O	Posttranslational modification, protein turnover, chaperones	-	-	-	-
227	EED94112.1	predicted protein [Thalassiosira pseudonana CCMP1335]	77429.1	0.067	1	1	1.33	0.071	0.001722	EED94112.1	MKVSSIALFLLPLAHSACAWTSSPHASVSAHHRRSRSSTLAATPTFLGSTTVDAAEKVKDADALAIEAAAAAAAAAAAVTNTNERTFGTVSTSKLNKLYDLVVIGGGPAGVAGAIKAAQMGRRAILIDKPKFDAGVLPNGLDLFFGGPTGLFSKALRDSAKNTNVAAMRAQHMDSDVIWKQITNDIVKLASRNAEGQCRTLARYGIDYLQGSAQLLGEDDDKNVNALKKFKNDLDSPENGVRSVSVSNTVLVDKDGNLMEESEVTVTGTKVLVATGSKSTRLRGIPFEQSHRVFDSDTINLLGYFPRSVTISGLGIIGIEFANIFNALGVKDVKILVRGDVESSTKKLGMDMDVANELMRLLRESGVQILERTTIEEFSYVPSPEKTDEYIQMKLTDGS…	100	0	gi|223998006|ref|XP_002288676.1|	predicted protein [Thalassiosira pseudonana CCMP1335]	30.49	5e-41	sp|P9WHH5|STHA_MYCTU	Probable soluble pyridine nucleotide transhydrogenase OS=Mycobacterium tuberculosis (strain ATCC 25618 / H37Rv) GN=sthA PE=1 SV=1	202	9e-56	COG1249	Pyruvate/2-oxoglutarate dehydrogenase complex, dihydrolipoamide dehydrogenase (E3) component or related enzyme	C	Energy production and conversion	K00382|1|4e-27|119|cre:CHLREDRAFT_57890| dihydrolipoamide dehydrogenase [EC:1.8.1.4]!K00383|3|6e-27|119|bpg:Bathy01g05260| glutathione reductase (NADPH) [EC:1.8.1.7]	GO:0045454//cell redox homeostasis;GO:0055114//oxidation-reduction process	GO:0050660//flavin adenine dinucleotide binding;GO:0016491//oxidoreductase activity;GO:0005509//calcium ion binding	GO:0005737//cytoplasm
228	EED91510.1	L7Ae, ribosomal protein 7Ae 60S large ribosomal subunit [Thalassiosira pseudonana CCMP1335]	13435.2	0.146	2	2	1.57	0.369	0.03538	EED91510.1	MSEKAFPLADADLTIALLDLVQQATNYKQTKKGANEATKTLNRGISEIIIMAADAEPIEILLHLPLLCEDKNVPYVFVPSKIALGRACGVSRPVIASSITTNEASQLKSLIDSMKIKIEQLLI	100	4e-62	gi|224003463|ref|XP_002291403.1|	L7Ae, ribosomal protein 7Ae 60S large ribosomal subunit [Thalassiosira pseudonana CCMP1335]	79.37	4e-48	sp|Q6C0I0|SNU13_YARLI	13 kDa ribonucleoprotein-associated protein OS=Yarrowia lipolytica (strain CLIB 122 / E 150) GN=SNU13 PE=3 SV=1	98.6	5e-26	COG1358	Ribosomal protein L7Ae or related RNA K-turn-binding protein	J	Translation, ribosomal structure and biogenesis	K12845|1|2e-47|151|cvr:CHLNCDRAFT_31020| U4/U6 small nuclear ribonucleoprotein SNU13	GO:0001510//RNA methylation;GO:0000478//endonucleolytic cleavage involved in rRNA processing	GO:0003723//RNA binding	GO:0005730//nucleolus;GO:0005840//ribosome;GO:0005829//cytosol
229	EJK50186.1	hypothetical protein THAOC_30872 [Thalassiosira oceanica]	18263.7	0.056	3	11	1.52	0.321	0.03022	EJK50186.1	MKLAVIAATAASAAAFVPSQNARMVTRIGAEFVYGDYDDKLWDNDAKKDVYNKWDPSAPRTGKNFNPFETFKGNSPDASGVFPGENFYKDPMRGDVSFQAMMDEKAEAEEREKNPKAGSEPGCPGCKNVSQKNERFLCQTCINELMHYHLPRAFAVNLVWTP	100	3e-100	gi|397576314|gb|EJK50186.1|	hypothetical protein THAOC_30872 [Thalassiosira oceanica]	-	-	-	-	-	-	-	-	-	-	-	-	-	-
230	EED94917.1	bifunctional fatty acid oxidation enzyme [Thalassiosira pseudonana CCMP1335]	83481	0.013	1	1	1.38	0.209	0.02673	EED94917.1	MMTPPSNIATIAISNGSPPGRHNPVNALGAPVRQYLQAALQSALANPSITSIILIGRPDGKGVFSAGADIKEFSGSSGGSVTKSEPGGVPTLNDLAHLIEQSSKPIVAVLTGACLGGGMELALAAQYRVADDTLKYGLPEVKIGLIPGAGGTQRLPRLCGVRHALDVIVRGRINGSAKEGLKFGLLDGVASEDESIVGCALRWASWASLLPPTTLESRRLCNRSVPSDAEGVENGDMCEFALQSIPPKDKGGESARATVEAIKASFELPSFEEGMECEKNIFNDLLYHSLQGRAYRHIFFAERASSSPRSKGRSTPVNPQLEKGKGAVGVIGAGTMGRGIAISFLRVGFGPLTLVDVNPKGLEAGVAHIQSTLKGEAKKGRLNPSKLGGILASIESSTN…	100	0	gi|223995601|ref|XP_002287474.1|	bifunctional fatty acid oxidation enzyme [Thalassiosira pseudonana CCMP1335]	38.69	5e-136	sp|Q6NYL3|ECHP_DANRE	Peroxisomal bifunctional enzyme OS=Danio rerio GN=ehhadh PE=2 SV=1	474	7e-156	COG1250	3-hydroxyacyl-CoA dehydrogenase	I	Lipid transport and metabolism	K10527|1|8e-100|327|pmum:103323034| enoyl-CoA hydratase/3-hydroxyacyl-CoA dehydrogenase [EC:4.2.1.17 1.1.1.35 1.1.1.211]	GO:0006631//fatty acid metabolic process;GO:0055114//oxidation-reduction process	GO:0003857//3-hydroxyacyl-CoA dehydrogenase activity;GO:0000166//nucleotide binding;GO:0050662//coenzyme binding	-
231	EED89527.1	nicotinate-nucleotide pyrophosphorylase, partial [Thalassiosira pseudonana CCMP1335]	31831.2	0.079	1	3	1.37	0.17	0.01583	EED89527.1	LSSLLPPPQIEAIVFQWLQDDMPSHFDVGGHVVGISIQKAELWMKSPGILAGIPFFEQVFKVCGGCTIEWHEEAIEGTFLAADNGTNKVKLATVTGPVSHLLRGERTALNSLSRCSGVASLSNKCVQIAKKGNWHGLVAGTRKTTPGFRLIEKYGLLVGGAATHRLDLSQMVMLKDNHIWSTGSITNAVTKARKVSGFSQKIEVECQSLEEANEAAEAGADVVMLDNFTPDKLKVDAKTFKTKYPHVTVEASGGITMDTMSDYFSESVDVISLGKLTQGYDCVDFSLKIVH	100	0	gi|224008214|ref|XP_002293066.1|	nicotinate-nucleotide pyrophosphorylase [Thalassiosira pseudonana CCMP1335]	56.4	1e-96	sp|A7SG73|NADC_NEMVE	Nicotinate-nucleotide pyrophosphorylase [carboxylating] (Fragment) OS=Nematostella vectensis GN=qprt PE=3 SV=1	186	6e-56	COG0157	Nicotinate-nucleotide pyrophosphorylase	H	Coenzyme transport and metabolism	K00927|1|2e-84|271|gsl:Gasu_34520| phosphoglycerate kinase [EC:2.7.2.3]!K00767|2|5e-82|253|cme:CYME_CMO013C| nicotinate-nucleotide pyrophosphorylase (carboxylating) [EC:2.4.2.19]	GO:0009435//NAD biosynthetic process	GO:0004514//nicotinate-nucleotide diphosphorylase (carboxylating) activity	-
232	EJK77104.1	hypothetical protein THAOC_01087 [Thalassiosira oceanica]	73316.2	0.167	1	1	1.33	0.187	0.02724	EJK77104.1	MSVSPSTMQFKRDYKGSEADVVPITRALISVSDKDGIVELCTFLASKNVELLSTGGTAKKLREAGLTVIDVSDYTGSPECLDGRVKTLHPKVHGGLLGVRGNPQHEADMEANGIGKIDMTVLNLYPFEATVAKGAAFEQCIENIDIGGPSMLRSTAKNHAFTTIVTSPDQYAEVRECIEGKGGTTLALRRRFAARAYSLSASYDSAIATWFTKELGEDSPVVTRVYKPEFPLKYGEFPESVRRKSGGEKYFFALQRRWFGLNTNPHYNMRCRMFEWRPGCNPHQKPAAISSLLNADLPFTVLNGTPGYINLLDAANAWLLVKELREATGLAAASSFKHVSPAGAAVAVPLTEVECAAYEVTPEGAAKLTPSALAYLRARNADPMCSFGDFAAVSDVVDE…	100	0	gi|397646041|gb|EJK77104.1|	hypothetical protein THAOC_01087 [Thalassiosira oceanica]	47.13	0	sp|O35567|PUR9_RAT	Bifunctional purine biosynthesis protein PURH OS=Rattus norvegicus GN=Atic PE=1 SV=2	425	2e-142	COG0138	AICAR transformylase/IMP cyclohydrolase PurH	F	Nucleotide transport and metabolism	K00602|1|6e-92|300|cme:CYME_CML194C| phosphoribosylaminoimidazolecarboxamide formyltransferase / IMP cyclohydrolase [EC:2.1.2.3 3.5.4.10]	GO:0006164//purine nucleotide biosynthetic process	GO:0004643//phosphoribosylaminoimidazolecarboxamide formyltransferase activity;GO:0003937//IMP cyclohydrolase activity	-
233	ACI64103.1	aldo-keto oxidoreductase [Thalassiosira pseudonana CCMP1335]	38463.3	0.023	1	1	1.3	0.198	0.04447	ACI64103.1	MSSYAKPSNFDLSSPSACPTYKLNSGHSMPVIAYGTFRCNPGEVSPCVINALKAGYRHFDLAHVYGNEKEIGKALKQAFDEGMVTREELFITGKLWNTDHEVNIVPKACAHSLNNLQLNYFDLYLIHFPVAWKHTGLDSPGWGASEFGDTPLIDTWRAMEGLVESGLCKSIGVSNYPLLLMHDLTTQAMIKPACNQIEVHAYYQRESLVNYCLSRNISVSAHTPLGGGAANAHQWNAVSPLQDPVVVGIAEAHGKSAGQVLLRYSLQRGIAVLPKSVKPRRMAENIDVFGFKLTEEEMKSLKALDKYVSYKTNPNPNVLQSFRNGNPLMISTCINLLWIAIQHI	100	0	gi|224011223|ref|XP_002295386.1|	aldo-keto oxidoreductase [Thalassiosira pseudonana CCMP1335]	44.88	6e-91	sp|P28475|S6PD_MALDO	NADP-dependent D-sorbitol-6-phosphate dehydrogenase OS=Malus domestica GN=S6PDH PE=2 SV=1	241	3e-76	COG0656	Aldo/keto reductase, related to diketogulonate reductase	Q	Secondary metabolites biosynthesis, transport and catabolism	K00011|1|8e-100|300|cmo:103490340| aldehyde reductase [EC:1.1.1.21]	GO:0046686//response to cadmium ion;GO:0055114//oxidation-reduction process	GO:0047641//aldose-6-phosphate reductase (NADPH) activity	GO:0005829//cytosol
234	ACI64480.1	predicted protein [Thalassiosira pseudonana CCMP1335]	62215.5	0.021	1	1	1.47	0.201	0.01172	ACI64480.1	MSPAIPSSPGRPGRSHSRGQSLSEFVLNPIDDTAPTIPPTDSGSVEGEETTITEHHEALMGAEYKNPNSIFKQPTLATLGDTPFHHEDGDKLEHHRVVATEIVAHPVQFETPEPILQNALVLLDPRIPDCIHLIEAGKKRGLMIMAVVPKPNDGSKALVEFFPTAEALLEVGMHQVYEPPMGSKFDIVECAANLKTIEAQQNLRFLGVVPCREAAVDFSDILGALLGLTVVNDLGLASARRDKGLMKVAVANAGLRVAKYARLTQSDGSDVLKALDELDLQYPVVVKTPRGMSTMDVYICNNEGEAVQHTAEIVRSVGPDGRKTQYALLEEFLVGEEFAINLVASPTTPRGVQVTDVWLYHKLNTDGTMVNTYQEMCDPHDRAFSSLVQYAEGVCRAVG…	100	0	gi|224004224|ref|XP_002295763.1|	predicted protein [Thalassiosira pseudonana CCMP1335]	31.17	1e-20	sp|E2JA31|DDAF_ENTAG	Dapdiamide A synthase OS=Enterobacter agglomerans GN=ddaF PE=1 SV=1	97.1	9e-20	COG0151	Phosphoribosylamine-glycine ligase	F	Nucleotide transport and metabolism	K14755|1|3e-09|63.9|ccp:CHC_T00004987001| carnosine synthase [EC:6.3.2.11]	GO:0008152//metabolic process	GO:0046872//metal ion binding;GO:0005524//ATP binding;GO:0003824//catalytic activity	-
235	EJK63941.1	hypothetical protein THAOC_15371 [Thalassiosira oceanica]	66632.9	0.025	1	1	1.53	0.36	0.04369	EJK63941.1	MSDQPTSTTSLSGSKHILFDLPVSNNGARCRIILYKKGIPKEEVDLVSPMALGGLKSDEFLKLNPAGLMPCLSIQKPENKYGISALSESDTIARYLISEYASVGPSFLSNHPLSNQIARWHDMYLTTIQGAMYKTSERLPFGNYADRKSAISAYRKNLAVIERFMGNDTGMFLCGNEVSLADATLFPSMVFASYILPKFDDSVAALPPKLAKWYENLKCNDEVFATVYAEIQGVLENSWEAKGRWNDIWLAGKTDSAPGTLFDKIIAGEIPASVVKEDDHLLAFKDINPMAPAHILVIPKDRSGLTNLRQASAEHTDILGRLLIAAGEIAKDTELGFGDGARIVINDGSDGGQEVMHLHVHVLGGRKLEVRYIATAIQKTSNPNEKVTASTGVTASFLY…	100	0	gi|397616354|gb|EJK63941.1|	hypothetical protein THAOC_15371 [Thalassiosira oceanica]	55.46	5e-34	sp|Q8GUN2|HINT1_ARATH	Adenylylsulfatase HINT1 OS=Arabidopsis thaliana GN=HINT1 PE=1 SV=1	114	1e-28	COG0537	Diadenosine tetraphosphate (Ap4A) hydrolase or other HIT family hydrolase	FGR	Nucleotide transport and metabolism;Carbohydrate transport and metabolism;General function prediction only	K00799|1|2e-37|145|bpg:Bathy01g06230| glutathione S-transferase [EC:2.5.1.18]!K02503|2|9e-37|138|mdm:103454689| histidine triad (HIT) family protein	GO:0008152//metabolic process	GO:0003824//catalytic activity	-
236	XP_002296659.1	hypothetical protein THAPSDRAFT_263844, partial [Thalassiosira pseudonana CCMP1335]	54386.1	0.02	3	27	1.27	0.112	0.01187	XP_002296659.1	PTFAMSEVAQHNGTADDGSVWMTYGGFVYDVTNFVANHPGGSDKIMLAAGGAIEPHWHVYRQHFASDLPLRLMEKMLIGHLHPTDQLQIDTAMDNLTSTTDDPYEHEPHRSPLLLVHSDTPMNAEVPSDIITKEYITPVGLFYIRHHHPVPLLSEEEVKEFRLEDGDTKQTAKLSLKQIQSLPKVEVTTTLQCSGNRRSGFNDLRRTSGTPWGQGAISTAKWGGARLVDVLMLAAEQQQQEVAAASVDDDHPTLQHLRMESLDGMLASIDILKALSPFGDVILAYEMNDEALPRDHGYPLRVIVPGYAAVRNVKWVSRLELSNEEAVGAWQRGLNYKVLPPAVVDAKNVDLDGMPGLGEVSVFSGITDVERVGDEGKKMVPGETVLVKASGWAWAGGGR…	100	0	gi|224013991|ref|XP_002296659.1|	hypothetical protein THAPSDRAFT_263844 [Thalassiosira pseudonana CCMP1335]	40.69	2e-104	sp|P07850|SUOX_CHICK	Sulfite oxidase OS=Gallus gallus GN=SUOX PE=1 SV=3	142	3e-36	COG2041	Periplasmic DMSO/TMAO reductase YedYZ, molybdopterin-dependent catalytic subunit	C	Energy production and conversion	K00387|1|1e-126|384|bpg:Bathy11g03160|	GO:0055114//oxidation-reduction process	GO:0020037//heme binding;GO:0016491//oxidoreductase activity;GO:0030151//molybdenum ion binding;GO:0009055//electron carrier activity	-
237	XP_002289363.1	vesicle-transport protein Bet3 [Thalassiosira pseudonana CCMP1335]	22406.1	0.045	5	11	1.21	0.058	0.004168	XP_002289363.1	MSTKKSAAQAGQSLWSAMPKANSELFALTYGSLVTELVRDYEDPIEVNAQLDRIGHSIGVRCVDEFLSKADVAGMSLATQCQNLRDTAEVVAKMGFKMFLGIQAEVGGFSQDQRSFSIYLQDNPLATFVELPGDEQSGGDDLRRLKYSNLYCGVIRGALEQVNLKVECNIVRDTLKGDEVNEIRVELKEVLADGAGDDYKEE	100	2e-148	gi|223999381|ref|XP_002289363.1|	vesicle-transport protein Bet3 [Thalassiosira pseudonana CCMP1335]	45.5	3e-56	sp|Q86K94|TPPC3_DICDI	Trafficking protein particle complex subunit 3 OS=Dictyostelium discoideum GN=trappc3 PE=3 SV=2	-	-	-	-	-	-	K20302|1|5e-60|189|ccp:CHC_T00008483001| trafficking protein particle complex subunit 3	-	-	-
238	EJK63051.1	hypothetical protein THAOC_16311 [Thalassiosira oceanica]	71182	0.083	1	1	2.18	0.788	0.03044	EJK63051.1	MGRWPRRGGAGVDVPRLLARATTLMSRFLASTRIFRSRAAAHSPSPNNSNMKFSTVAVALSTLSSTQGFSPVAPNRGRSMAQRGVVNVEPSSTELNLFGSKRLFNSPAKVDGDITEKEVKALFELWNQALATGDSRIVASRYTKSPVLLPTVSDVPRTDFASVKDYFDSFLLKQPQGKIIESHVNIGEGWASDVGIYEFTMGATGDKVKGRYSYNYVKEDGIWKIQHHHSSVMPEEIAMGKPITDDEVRGLFSLWNNALATLDPKQVANRYAKTGVLLPTVSDTPRADYGAIEDYFVNFLKLKPQGEILESYVTVGHNWCQDVGIYEFAMGATGKKVKGRYSFIYVYEDGEWKIQHHHSSIMPEGIVTAEPITEKEVRGLFNLWNDALATLDPKKVADR…	100	0	gi|397614843|gb|EJK63051.1|	hypothetical protein THAOC_16311 [Thalassiosira oceanica]	-	-	-	-	140	6e-37	COG4875	Uncharacterized protein	S	Function unknown	-	GO:0006468//protein phosphorylation	GO:0005516//calmodulin binding;GO:0004683//calmodulin-dependent protein kinase activity	-
239	XP_002287767.1	ran-type small G protein [Thalassiosira pseudonana CCMP1335]	24846.7	0.245	2	11	1.28	0.044	0.0007108	XP_002287767.1	MQAQQDMPEFKLILVGDGGVGKTTFVKRHLTGEFEKKYVATLGVEVHPLVFHTNRGPIKFNVWDTAGQEKFGGLRDGYYIQGQCAIIMFDVTSRITYKNVPNWHRDLTRVCENIPIVLTGNKVEIKDRKVKAKQITFHRKKNLQYYDISAKSNYNFEKPFLWLARKLSGDNQLHFVEAPALQPPEFQFDEATKQKYEAELAAAAAMPLPEDDDEDL	100	5e-147	gi|223996187|ref|XP_002287767.1|	ran-type small G protein [Thalassiosira pseudonana CCMP1335]	83.16	4e-123	sp|P38542|RAN_BRUMA	GTP-binding nuclear protein Ran OS=Brugia malayi GN=Bm1_44725 PE=2 SV=2	79.3	6e-17	COG1100	GTPase SAR1 family domain	R	General function prediction only	K07936|1|1e-120|344|pxb:103942502| GTP-binding nuclear protein Ran	GO:0007264//small GTPase mediated signal transduction;GO:0006913//nucleocytoplasmic transport;GO:0006184//GTP catabolic process;GO:0006886//intracellular protein transport	GO:0003924//GTPase activity;GO:0005525//GTP binding	GO:0005840//ribosome;GO:0033009//nucleomorph
240	EJK72012.1	hypothetical protein THAOC_06497, partial [Thalassiosira oceanica]	76044.6	0.011	5	6	2.15	0.196	0.0004706	EJK72012.1	AGGAASLAAASRHSRSGWGIDPEADAEENNLGWPPRVVLTPITKHERQTTHSTFSMEHEGGDSSMTSHRNNRVWTTYNSYNTVLRIEQNSPLITQLNVYDDTPFTVEDWIRLGRAVGGNTNIVELRLRFFTDGADDDPIRSTEVQNAFCAGLARNRSIQKFQSNNIHYTSEQIGIMRPFFSHNASLTRIKFDGSELEPGAIGVLTEAIKKRGGKCQDHSFIRIQIGCWVTKTSRRNSGPRKDVLPFDKLDIEWVHQKLDLYQNRIRDDGCMVIAESLRTNKRLRWLSVGMNNITSDGFASFIPAVYDTSSIDSTLNSNHTLEQVTTYRERFAPRELLDILRMNKTTDKRSTAKLKVLRCHFFDGNFDMTAIASLDMKLLPCLLGWFARLKESKNADFKV…	100	0	gi|397635789|gb|EJK72012.1|	hypothetical protein THAOC_06497, partial [Thalassiosira oceanica]	-	-	-	-	-	-	-	-	-	-	-	-	-	-
241	EED86160.1	cytochrome c550, PsbV [Thalassiosira pseudonana CCMP1335]	18039.2	0.27	1	3	1.69	0.328	0.01227	EED86160.1	MFKTYSKSFACILFCIFNIFVVSASAIDLDEATRTVVTDSSGNTTVLTPEQVKRGKRLFNATCGACHTGGITKTNPNVGLDPEALSLATPRRDNISALVDYLKNPTTYDGLESIAEIHPSIKSADIYPRMRSLTDEDLYSIAGHIMLQPKIVAEKWGGGKIYF	100	7e-120	gi|118411100|ref|YP_874494.1|	PsbV [Thalassiosira pseudonana]	100	1e-120	sp|A0T0N2|CY550_THAPS	Cytochrome c-550 OS=Thalassiosira pseudonana GN=psbV PE=3 SV=1	221	2e-73	COG2010	Cytochrome c, mono- and diheme variants	C	Energy production and conversion	K02720|1|2e-77|230|ccp:CHC_60|	GO:0019684//photosynthesis, light reaction;GO:0022904//respiratory electron transport chain;GO:0018063//cytochrome c-heme linkage	GO:0009055//electron carrier activity;GO:0020037//heme binding;GO:0005506//iron ion binding	GO:0009535//chloroplast thylakoid membrane;GO:0009523//photosystem II
242	XP_002289528.1	fumarate hydratase [Thalassiosira pseudonana CCMP1335]	68132.5	0.109	2	7	1.22	0.067	0.00574	XP_002289528.1	MAAYLKRAAMIRSVRSHASSLLPSLASSTLPSASTPLIGNFISLNACNTLLDRWLSSSAGNVEVTKTSRSSSKKIKPSPPAFNYTPLFDSAPDTTTSYRQILPSSAVETVSLPDGTSLLRVSEEALRTLSSTAFEDIAHLLRPAHLAQLRKILDDPEASDNDRFVAMELLKNANIASGRILPGCQDTGTAIVMGKRGHLVLTDGNDEEHLSGGAYDAYTRSNLRYSQVAPVSMFEEKNTGTNLPAQVDIFGAKGDEYNFLFIAKGGGSANKTFLYQQTKALLNTGSLDAFLKEKIKTIGTSACPPYHLAVVIGGLSAEQNLKTVKLASTKYYDTLPTEGDPNGSGRAFRDVEWEEHILEMTRNLGIGAQFGGKYFCHDVRVVRLPRHGASCPVGIGVSC…	100	0	gi|223999711|ref|XP_002289528.1|	fumarate hydratase [Thalassiosira pseudonana CCMP1335]	60.89	0	sp|P0AC33|FUMA_ECOLI	Fumarate hydratase class I, aerobic OS=Escherichia coli (strain K12) GN=fumA PE=1 SV=2	757	0	COG1951	Tartrate dehydratase alpha subunit/Fumarate hydratase class I, N-terminal domain	C	Energy production and conversion	K01676|1|0.0|787|vcn:VOLCADRAFT_77105| fumarate hydratase, class I [EC:4.2.1.2]	GO:0006091//generation of precursor metabolites and energy	GO:0004333//fumarate hydratase activity	-
243	EJK46908.1	hypothetical protein THAOC_34402, partial [Thalassiosira oceanica]	5248.79	0.244	2	2	1.6	0.221	0.006869	EJK46908.1	RTQKKVDKLTAQIPYHEGRGNKDEVTKIKEQVESIWQKARDAQFA	100	6e-26	gi|397569695|gb|EJK46908.1|	hypothetical protein THAOC_34402, partial [Thalassiosira oceanica]	-	-	-	-	-	-	-	-	-	-	-	-	-	-
244	EED89327.1	predicted protein [Thalassiosira pseudonana CCMP1335]	30581.5	0.081	1	1	1.88	0.245	0.002239	EED89327.1	MKTCSFLFAAIGLTAVSAFTPQPFARTQISTRNGEQSQVVLSASKNRDKVASRSKWADARGYGSTAASASSDAGKSAPKLIIAGAPASGKGTQCELIKEKYGVVHLSTGDMLRAAVAAGTEVGKQAKDFMDAGKLVPDEVIIGVVKNRLDEADCIESGWLLDGFPRTPAQAEALAAAGVSADCFIFLNVPDEVLVERVVGRRTDPETGKIYHMTFSPPEDEEILARLEQRSDDTEEKVVVRLEQFHANVEAVKGSYTDIAVEVDGTQKPEEVSGVIMQAIDEVLA	100	0	gi|224009265|ref|XP_002293591.1|	predicted protein [Thalassiosira pseudonana CCMP1335]	62.57	1e-83	sp|Q6ZC69|KAD2_ORYSJ	Probable adenylate kinase 2, chloroplastic OS=Oryza sativa subsp. japonica GN=Os08g0109300 PE=2 SV=1	199	5e-62	COG0563	Adenylate kinase or related kinase	F	Nucleotide transport and metabolism	K00939|1|3e-86|263|egr:104449831| adenylate kinase [EC:2.7.4.3]	GO:0009165//nucleotide biosynthetic process;GO:0046939//nucleotide phosphorylation	GO:0004017//adenylate kinase activity;GO:0005524//ATP binding	GO:0009536//plastid
245	XP_002285989.1	predicted protein [Thalassiosira pseudonana CCMP1335]	45691.5	0.061	1	1	1.5	0.063	0.0002972	XP_002285989.1	MNSLCFTFALTGILSRGCAPSHAFQLPVSLLSVTRDDLIRTHQMMHPSSPVPALRRSTALGMATWSNGQAIKEYQDFLASGQSELDVKDDGPSVIVHSSNPNNITPLTDAIVGLGKGNDLLLTPNEPLPPAIGETTSYPIYITLPPYELREFIQQLDEEWKARAEDFVFFSGGKICGVVEPTLREFGMCRDAMTQVTVGFSLPKPGTGLGGTTRKPEDMSCNIGADVNGENKWAGESVACGKWNGAIAGRLSENAIRCKTVFYREWRRAMWERALYDAVWNVVGAVRDEPTDHSDVAMFFELEASDMMWEIANHLRGGLAVTLIYGFEDRLFSIAEMRGKGEPCELNDNMFDYIQNVFPGRNRMLSEYCNYAKDKRGLLQGVNVPPVPSELTELPSKIR…	100	0	gi|223992611|ref|XP_002285989.1|	predicted protein [Thalassiosira pseudonana CCMP1335]	-	-	-	-	-	-	-	-	-	-	-	-	-	-
246	XP_002294612.1	aspartoacylase, partial [Thalassiosira pseudonana CCMP1335]	31867.1	0.046	1	4	1.68	0.29	0.009804	XP_002294612.1	KIAIVGGTHGNEYTGVWCIKSIEKQRELLAYPSLDLHTLLANPVAYMQNKRFVDVDLNREFSVEKLKRALSSLPHEAVRAREIEAILGPKITNSNIEEDPLTDVVIDLHTTTTNMGISLIIPEGDALMSAAAAYYGYENVQCLMHALPQRKDRQNLSSCGRHGFTIEVGPVPQGVIRHDVVEKTEAAMHSLLEFLHLRNLDMVPCYRSAPAVRPGELSGKISWSNDATNPNFPAVMIHKSLQDRDFYPLRVGDPLFVGLDGNVITYDGSHGDEVHLIFVNEGGYY	100	0	gi|224011918|ref|XP_002294612.1|	aspartoacylase [Thalassiosira pseudonana CCMP1335]	37.98	2e-55	sp|Q8YQC1|ASPA_NOSS1	Probable aspartoacylase OS=Nostoc sp. (strain PCC 7120 / SAG 25.82 / UTEX 2576) GN=alr3912 PE=3 SV=1	184	6e-55	COG2988	Succinylglutamate desuccinylase	E	Amino acid transport and metabolism	-	GO:0008152//metabolic process	GO:0016788//hydrolase activity, acting on ester bonds;GO:0016811//hydrolase activity, acting on carbon-nitrogen (but not peptide) bonds, in linear amides	-
247	XP_002291402.1	predicted protein [Thalassiosira pseudonana CCMP1335]	59797.3	0.023	1	3	1.27	0.164	0.0388	XP_002291402.1	MAESTTRAYSSFTPSWQRFHEFAAPIASSSGAGSAAASSSSNQQHPYTRQYSHVYSARLAGLRERCLKNAREKLAGGELDGKVEVVDRIIEVKEGAWSILVGTIVKETDPKRRPPVTSTYTDADACSFLFPTDGSANAGVDGVQESLRAHLFDLDKGDILHLEDESGRVELSPETTDKDGMDVDNADALDPNKVATGVVVAVIGKVSAEKGVMHVHSVHFAGPPPAEKKSASGDELRGARVNDNETADPTLLLVSGLGCGSDSPSDVESGGSLALRREMLLEYLTNNMGNSEGNGSSVCRVIVAGGSIAPPVNASSDDETTKENKKSNCNSVAKSKNGKNDSSSALAFSLRELDLYLSEILSSGVPVDYIPGWHDPTNANWPQRPIHSCLLPNACSYVD…	100	0	gi|224003461|ref|XP_002291402.1|	predicted protein [Thalassiosira pseudonana CCMP1335]	30.29	1e-49	sp|O48520|DPOD2_ARATH	DNA polymerase delta small subunit OS=Arabidopsis thaliana GN=POLD2 PE=2 SV=2	-	-	-	-	-	-	K02328|1|7e-55|194|pvu:PHAVU_001G143200g| DNA polymerase delta subunit 2	GO:0016458//gene silencing;GO:0016569//covalent chromatin modification;GO:0043412//macromolecule modification;GO:0006260//DNA replication	GO:0003887//DNA-directed DNA polymerase activity;GO:0003677//DNA binding	-
248	EJK52449.1	hypothetical protein THAOC_28271, partial [Thalassiosira oceanica]	94227.5	0.011	2	4	1.68	0.299	0.01101	EJK52449.1	FCHGCVLREQQRVAEDNNGRVPKWLKCMACREKTSFRPDEPKYHRLLIDLLGRAQQYASYQLKQEGQGDAISHASSDADDDERTSPETSKVDEQCSLKLEGDSPALDDESSYQHAVKHEELPAEKLHVRVKVEEPEDIIDEQFAESNRENEATADDCETDHAPEDEETNASSLVNEQKNIIHLIELLQYRVRHSKVPQVFETIDEISRQKELITPSIIVEFPLGDAIRSARKKFGDEYPEMKMKCKALSSEIRRIYEKEAENGVRNGKRTNEQAEHYEHSKLPRLALADDVHAGCFHTESTVDGYVAEAHSGDFRTELIEKEQDAREEDSIMPCKVDEVDKIPRWPDEVLSGGFHEESIEKKQDTRDEDSDMSCEADEDEEFSDVVPRSGGEVEPGGGE…	100	0	gi|397582877|gb|EJK52449.1|	hypothetical protein THAOC_28271, partial [Thalassiosira oceanica]	29.22	8e-18	sp|P41891|GAR2_SCHPO	Protein gar2 OS=Schizosaccharomyces pombe (strain 972 / ATCC 24843) GN=gar2 PE=1 SV=2	73.2	8e-14	COG0724	RNA recognition motif (RRM) domain	J	Translation, ribosomal structure and biogenesis	K11294|1|3e-27|119|gmx:100814693| nucleolin	-	-	-
249	EJK69270.1	hypothetical protein THAOC_09491 [Thalassiosira oceanica]	16184.1	0.049	1	1	1.56	0.09	0.0005996	EJK69270.1	MSTGVAVSDEVSTSFNKFKLGQEPYKLRYFIYEIKNKKEIVISSQGDRSKTYEDFVEELPENDCRYGLIDIEFETDDGRPTSKIVFISWNPDTASIRPKMLYSGSKEALKSALVGVGIHINATDHSELDFEEAILPVCKKFT	100	5e-102	gi|397629234|gb|EJK69270.1|	hypothetical protein THAOC_09491 [Thalassiosira oceanica]	43.48	5e-35	sp|Q96VU9|COFI_OGAPD	Cofilin OS=Ogataea parapolymorpha (strain ATCC 26012 / BCRC 20466 / JCM 22074 / NRRL Y-7560 / DL-1) GN=COF1 PE=2 SV=1	-	-	-	-	-	-	K05765|1|2e-33|117|bdi:100839676| cofilin		GO:0003779//actin binding	GO:0005622//intracellular
[truncated: 5 more columns]
