# Supplementary material for: Quantitative Proteomic Analysis Reveals Novel Insights into Intracellular Silicate Stress-Responsive Mechanisms in the Diatom Skeletonema dohrnii
Source: Int J Mol Sci. 2019 May 23;20(10):2540. doi: 10.3390/ijms20102540 (PMC6566588; doi:10.3390/ijms20102540)
Supplement: Supplementary file 1 [file ijms-20-02540-s001.zip › IJMS-Table S4.xlsx]

## Sheet: Table S4 Downregulated protein 
Title	Quantitative Proteomic Analysis Reveals Novel Insights into Intracellular Silicate Stress-Responsive Mechanisms in the Diatom Skeletonema dohrnii
Authors	Thangaraj Satheeswaran, Shang Xiaomei, Sun Jun*, Liu Haijiao
Table S4	Identified differentially downregulating proteins in energy, carbon, purine and pyrimidine metabolisms
		Photosynthesis
No.	Gene	Protein_ID	Description	Mass	Protein_Coverage	Mean ratio	Std Dev	P-value	log (2) values	Protein_ID	Protein_Seqence	NCBInr Identity	NCBInr E-value	NCBInr Accession	NCBInr Description	Swissprot Identity	Swissprot E-value	Swissprot Accession	Swissprot Description	COG Score	COG E-value	COG ID	COG Function-Description	COG Code	COG Function-Categories	KEGG(ko_id|rank|evalue|score|identity|ko_definition)	GO Biological_Process	GO Molecular_Function	GO Cellular_Component
1	PsbA	AFO84283.1	photosystem II protein D1, partial (chloroplast) [Stephanodiscus hantzschii]	35595.7	0.062	0.55	0.179	0.03164	-1.52051	AFO84283.1	RREGVSLWERFCAWITSTENRLYIGWFGCLMFPTLLTATSCFIIAFIAAPPVDIDGIREPVAGSLLYGNNIISGAVIPSSNAIGMHFYPIWEAASVDEWLYNGGPYQLIVLHFLLGVASYMGREWELSYRLGMRPWIFVAFSAPVAAASAVFLVYPIGQGSFSDGMPLGISGTFNFMLVFQAEHNILMHPFHMAGVAGVFGGSLFSAMHGSLVTSSLIRETTENESTNYGYKFGQEEETYNIVAAHGYFGRLIFQYASFNNSRALHFFLALWPVLGIWLTAMGISTMAFNLNGFNFNQSVVDSQGRVINTWADIINRADL	100	0	gi|691189961|gb|AIR75475.1|	photosystem II protein D1 (chloroplast) [Cyclotella sp. L04_2]	100	0	sp|A0T0W2|PSBA_THAPS	Photosystem II protein D1 OS=Thalassiosira pseudonana GN=psbA PE=3 SV=1	-	-	-	-	-	-	K02703|1|0.0|575|mtr:MTR_0002s0380|	GO:0009772//photosynthetic electron transport in photosystem II;GO:0009635//response to herbicide	GO:0016491//oxidoreductase activity;GO:0045156//electron transporter, transferring electrons within the cyclic electron transport pathway of photosynthesis activity;GO:0005506//iron ion binding	GO:0030076//light-harvesting complex;GO:0009523//photosystem II;GO:0016021//integral component of membrane;GO:0009535//chloroplast thylakoid membrane
2	PsbD	sp|A0T0T0.1|PSBD_THAPS	RecName: Full=Photosystem II D2 protein; Short=PSII D2 protein; AltName: Full=Photosystem Q(A) protein	39248.7	0.168	0.58	0.199	0.04306	-1.43816	sp|A0T0T0.1|PSBD_THAPS	MTIAIGQNQERGLFDLVDDWLKRDRFVFVGWSGILLFPTAYLAAGGWFTGTTFVTSWYTHGLASSYLEGCNFLTAAVSTPANSMGHSLLLLWGPEAQGDFTRWCQIGGLWAFIALHGAFGLIGFCLRQFEIARLVGIRPYNAIAFSGPIAVFVSVFLLYPLGQASWFFAPSFGVAAIFRFLLFLQGFHNWTLNPFHMMGVAGILGGALLCAIHGATVENTLFEDGDAANTFRAFTPTQSEETYSMVTANRFWSQIFGVAFSNKRWLHFFMLFVPVAGLWTSSIGIVGLALNLRAYDFVSQELRAAEDPEFETFYTKNILLNEGIRSWMAAQDQPHENFVFPEEVLPRGNAL	100	0	gi|118411148|ref|YP_874542.1|	photosystem II reaction center protein D2 [Thalassiosira pseudonana]	100	0	sp|A0T0T0|PSBD_THAPS	Photosystem II D2 protein OS=Thalassiosira pseudonana GN=psbD PE=3 SV=1	-	-	-	-	-	-	K02706|1|0.0|684|ccp:CHC_205|	GO:0009772//photosynthetic electron transport in photosystem II	GO:0016491//oxidoreductase activity;GO:0045156//electron transporter, transferring electrons within the cyclic electron transport pathway of photosynthesis activity;GO:0005506//iron ion binding	GO:0030076//light-harvesting complex;GO:0009523//photosystem II;GO:0016021//integral component of membrane;GO:0009535//chloroplast thylakoid membrane
3	PsbC	AIR75860.1	photosystem II CP43 chlorophyll apoprotein (chloroplast) [Roundia cardiophora]	52050.2	0.202	0.52	0.156	0.0202	-1.50835	AIR75860.1	MKISYSLRRYYHVETPFNSSIAGRDIESTGFAWWSGNARLINVSGKLLGAHVAHAGLMVFWAGAMVLFEVSHFVPEKPLYEQGFICIQHLATLGYGIGPGGEITSTVPYFAVGVIHLISSAVLGFGGIYHSLLGPDTLEESFPFFGYDWRDKNKMTTILGIHLCLLGLGSLLLVAKAMYLGGIYDTWAPGGGDVRYITTPTLNPIVIFGYVFRSPFGGDGWVVSVNNMEDLVGGHIWVGVLCIVGGVWHIFTKPFSWARRAFVWSGEAYLSYSLAAISLMGFTASLYSWYNNTAYPSELYGPTGPEASQSQAFTFLVRDQRLGANVSSAQGPTGLGKYLMRSPSGEIIFGGETMRFWDLRAPWVEPLRGPNGLDINKIKNDIQPWQERRAAEYMTHAPL…	100	0	gi|700658182|ref|YP_009093187.1|	photosystem II CP43 chlorophyll apoprotein (chloroplast) [Roundia cardiophora]	96.18	0	sp|P49472|PSBC_ODOSI	Photosystem II CP43 reaction center protein OS=Odontella sinensis GN=psbC PE=3 SV=1	-	-	-	-	-	-	K02705|1|0.0|746|ccp:CHC_210|	GO:0009772//photosynthetic electron transport in photosystem II;GO:0018298//protein-chromophore linkage	GO:0045156//electron transporter, transferring electrons within the cyclic electron transport pathway of photosynthesis activity;GO:0016168//chlorophyll binding	GO:0030076//light-harvesting complex;GO:0009523//photosystem II;GO:0016021//integral component of membrane;GO:0009535//chloroplast thylakoid membrane
4	PsbB	YP_004072575.1	photosystem II CP47 chlorophyll apoprotein (chloroplast) [Thalassiosira oceanica CCMP1005]	56392.6	0.234	0.57	0.134	0.01654	-1.25907	YP_004072575.1	MALPWYRVHTVVLNDPGRLISVHLMHTALVAGWAGSMALYELAVFDPSDPVLNPMWRQGMFVMPFMTRLGITDSWGGWSITGESVSNPGLWSFEGVALSHIVLSGMCFLAAIWHWVYWDLELFRDPRTGEPALDLPKIFGIHLLLSGLLCFGFGAFHVTGLFGPGIWVSDAYGITGKVQPVAPSWGADGFNPFNPGGIAAHHIAAGIFGILAGIFHLTVRPPQRLYRALRMGNIETVLSSSISAVFFAAFVTSGTMWYGAAATPIELFGPTRYQWDSGYFQQEIERQVEASVTEGLSESQAWSRIPDKLAFYDYIGNNPAKGGLFRSGPMDKGDGIAEAWLGHPIFRDKEGRELTVRRMPAFFETFPVILVDKDGIIRADIPFRRAESKYSIEQVGVTV…	100	0	gi|315320519|ref|YP_004072575.1|	photosystem II CP47 chlorophyll apoprotein [Thalassiosira oceanica CCMP1005]	97.05	0	sp|P49471|PSBB_ODOSI	Photosystem II CP47 reaction center protein OS=Odontella sinensis GN=psbB PE=3 SV=1	-	-	-	-	-	-	K02704|1|0.0|816|ccp:CHC_440|	GO:0009767//photosynthetic electron transport chain;GO:0018298//protein-chromophore linkage	GO:0016168//chlorophyll binding	GO:0009523//photosystem II;GO:0016021//integral component of membrane;GO:0009535//chloroplast thylakoid membrane
5	PsbE	AIR75596.1	photosystem II cytochrome b559 alpha subunit (chloroplast) [Cyclotella sp. WC03_2]	9489.82	0.321	0.5	0.154	0.01873	-1.6353	AIR75596.1	MSGGSTGERPFSDIITSVRYWIIHTITIPSLFVSGWLFISTGLAYDVFGTPRPNEYFTQDRQQVPLVNDRFSAKQELEDLTKGL	100	1e-56	gi|118411160|ref|YP_874554.1|	cytochrome b559 alpha chain [Thalassiosira pseudonana]	100	2e-57	sp|A0T0U2|PSBE_THAPS	Cytochrome b559 subunit alpha OS=Thalassiosira pseudonana GN=psbE PE=3 SV=1	-	-	-	-	-	-	K02707|1|4e-55|168|ccp:CHC_1170|	GO:0009767//photosynthetic electron transport chain	GO:0009055//electron carrier activity;GO:0005506//iron ion binding;GO:0020037//heme binding	GO:0009539//photosystem II reaction center;GO:0030096//plasma membrane-derived thylakoid photosystem II;GO:0016021//integral component of membrane;GO:0009535//chloroplast thylakoid membrane
6	PsbF	YP_874553.1	cytochrome b559 beta chain (chloroplast) [Thalassiosira pseudonana]	4888.62	0.326	0.85	0.174	0.1817	-1.42849	YP_874553.1	MTKNINQPVAYPIFTFRWLAVHGLAIPTVFFLGGITAMQFIQR	100	1e-24	gi|118411159|ref|YP_874553.1|	cytochrome b559 beta chain [Thalassiosira pseudonana]	100	2e-25	sp|A0T0U1|PSBF_THAPS	Cytochrome b559 subunit beta OS=Thalassiosira pseudonana GN=psbF PE=3 SV=1	-	-	-	-	-	-	K02708|1|2e-20|77.8|ccp:CHC_1165|	GO:0009767//photosynthetic electron transport chain	GO:0009055//electron carrier activity;GO:0005506//iron ion binding;GO:0020037//heme binding	GO:0009539//photosystem II reaction center;GO:0016021//integral component of membrane;GO:0009535//chloroplast thylakoid membrane
7	PsbQ	XP_002286571.1	predicted protein [Thalassiosira pseudonana CCMP1335]	22439.4	0.057	1.19	0.079	0.01298	-0.120223	XP_002286571.1	MKIVLALVAASSVSAFAPQSNGRQSVAMQAENSRREALSTIAAATAAILPAAANAAAGESPRFSVFGVIGDGTSYSEGAAYGSDQSAETYSPYSVYGKVGSKDALFEAGNAGEIARKKGYIVESQKRLKNLPGYVEKKQWFNVKDELTRYMYETRGAVRGLAQTPEQKKLAKAFFQAIEEASLQATLKNGDKCAAASADSIKLLDQFYASL	100	2e-123	gi|223993775|ref|XP_002286571.1|	predicted protein [Thalassiosira pseudonana CCMP1335]	-	-	-	-	-	-	-	-	-	-	K08901|1|2e-08|56.2|gsl:Gasu_43120| photosystem II oxygen-evolving enhancer protein 3	GO:0015979//photosynthesis	GO:0005509//calcium ion binding	GO:0019898//extrinsic component of membrane;GO:0009654//photosystem II oxygen evolving complex
No.	Gene	Protein_ID	Description	Mass	Protein_Coverage	Mean ratio	Std Dev	P-value	log (2) values	Protein_ID	Protein_Seqence	NCBInr Identity	NCBInr E-value	NCBInr Accession	NCBInr Description	Swissprot Identity	Swissprot E-value	Swissprot Accession	Swissprot Description	COG Score	COG E-value	COG ID	COG Function-Description	COG Code	COG Function-Categories	KEGG(ko_id|rank|evalue|score|identity|ko_definition)	GO Biological_Process	GO Molecular_Function	GO Cellular_Component
1	PsaA	YP_009093407.1	photosystem I P700 apoprotein A1 (chloroplast) [Thalassiosira weissflogii]	83908.3	0.102	0.54	0.128	0.0128	-1.34982	YP_009093407.1	MAISSTERRSKNVQVFVEKDAVETSFAKWAQPGHFSRTLAKGPKTTTWIWNLHADAHDFDSQTNSLEEVSRKIFSAHFGQLAIIFLWISGMHFHGAYFSNYSAWLTDPISIKQSSQVVWPIVGQEILNADVGGNFQGVQTTSGWFQMWRAEGITSEVELYWTAIGGLAMSAIMLFAGWFHYHKAAPKLEWFQNAESMMNHHLAGLLGLGCLSWSGHQIHIALPINKLLDAGVSPQEIPLPHEFIINRDLMAQLYPSFGKGLAPFFSGNWGEYSDFLTFKGGLNPVTGGLWLSDIAHHHLALAVLFIVAGHMYRTNWGIGHNMKEILEAHKGPFTGEGHKGLYEILTTSWHAQLAINLAMMGSLSIIVAHHMYAMPPYPYIATDYATQLSLFTHHMWIGG…	100	0	gi|700082609|ref|YP_009093407.1|	photosystem I P700 apoprotein A1 (chloroplast) [Thalassiosira weissflogii]	98.67	0	sp|A0T0M8|PSAA_THAPS	Photosystem I P700 chlorophyll a apoprotein A1 OS=Thalassiosira pseudonana GN=psaA PE=3 SV=1	592	0	COG2885	Outer membrane protein OmpA and related peptidoglycan-associated (lipo)proteins	M	Cell wall/membrane/envelope biogenesis	K02689|1|0.0|1330|ccp:CHC_635| photosystem I P700 chlorophyll a apoprotein A1	GO:0018298//protein-chromophore linkage;GO:0015979//photosynthesis;GO:0022900//electron transport chain	GO:0016491//oxidoreductase activity;GO:0009055//electron carrier activity;GO:0000287//magnesium ion binding;GO:0016168//chlorophyll binding;GO:0051539//4 iron, 4 sulfur cluster binding	GO:0016021//integral component of membrane;GO:0009522//photosystem I;GO:0009535//chloroplast thylakoid membrane
2	PsaB	ADB27549.1	photosystem I P700 chlorophyll a apoprotein A2 (chloroplast) [Thalassiosira oceanica CCMP1005]	82157.9	0.05	0.46	0.13	0.01079	-1.6777	ADB27549.1	MATKFPKFSQALAQDPATRRIWYGIATAHDLEAHDGMTEENLYQKIFASHFGHLAIIFLWTAGNLFHVAWQGNFEKWVSNPLKTRPIAHAIWDPHFGEKALKAFSKGNTYPVNISFSGLYQWWYTIGFRTNQELYRASIGVLLLASVLLIAGWLHLQPKFRPSLSWFKNNESRLNHHLSGLLGFSSLAWTGHIVHVAIPASRGVHVGWDNFLTTPPHPAGLTPFFTGNWTVYAENPDTAEHAFNTADGAGTAILTFLGGFHPQTQSLWLTDIAHHHLAIAVVFIVAGHMYRTNFGIGHNMKEILDAHRPPGGRLGAGHVGLFETITNSLHMQLGLALACLGVATSLTAQHMYALTPYAYLSKDFTTEAALYTHHQYIAGFLMVGAFAHGAIFFVRDYDP…	100	0	gi|315320539|ref|YP_004072596.1|	photosystem I P700 chlorophyll a apoprotein A2 [Thalassiosira oceanica CCMP1005]	95.77	0	sp|A0T0M9|PSAB_THAPS	Photosystem I P700 chlorophyll a apoprotein A2 OS=Thalassiosira pseudonana GN=psaB PE=3 SV=1	1085	0	COG2885	Outer membrane protein OmpA and related peptidoglycan-associated (lipo)proteins	M	Cell wall/membrane/envelope biogenesis	K02690|1|0.0|1237|cme:CymeCp113|	GO:0018298//protein-chromophore linkage;GO:0015979//photosynthesis;GO:0022900//electron transport chain	GO:0016491//oxidoreductase activity;GO:0009055//electron carrier activity;GO:0000287//magnesium ion binding;GO:0016168//chlorophyll binding;GO:0051539//4 iron, 4 sulfur cluster binding	GO:0016021//integral component of membrane;GO:0009522//photosystem I;GO:0009535//chloroplast thylakoid membrane
3	PsaC	AIR75477.1	photosystem I subunit VII (chloroplast) [Cyclotella sp. L04_2]	9287.28	0.593	1.08	0.169	0.4672	-0.630371	AIR75477.1	MSHTVKIYDTCIGCTQCVRACPTDVLEMVPWDGCKSGQIASSPRVEDCVGCKRCETACPTDFLSVRVYLGAETTRSLGLAY	100	3e-54	gi|118411182|ref|YP_874576.1|	photosystem I iron-sulfur center [Thalassiosira pseudonana]	100	6e-55	sp|A0T0W4|PSAC_THAPS	Photosystem I iron-sulfur center OS=Thalassiosira pseudonana GN=psaC PE=3 SV=1	163	5e-53	COG1143	Formate hydrogenlyase subunit 6/NADH:ubiquinone oxidoreductase 23 kD subunit (chain I)	C	Energy production and conversion	K02691|1|1e-51|159|cvr:ChvaP_p026|	GO:0009773//photosynthetic electron transport in photosystem I	GO:0046872//metal ion binding;GO:0016491//oxidoreductase activity;GO:0009055//electron carrier activity;GO:0051539//4 iron, 4 sulfur cluster binding	GO:0009522//photosystem I;GO:0009535//chloroplast thylakoid membrane
4	PsaF	YP_009093479.1	photosystem I subunit III (chloroplast) [Thalassiosira weissflogii]	20532.8	0.265	0.61	0.036	0.0004692	-0.82968	YP_009093479.1	MKRVNLLSLLFAVLIALVPNQAFAEIGGLTKCSESPAFTKRLNASVKKLEQRASQYEADSPPALALKQQIERTQARFDKYSRSELLCGTDGLPHLVADGRWSHAAEFILPGFGFIYISGWIGWVGRKYLRAVSTSANPSESEIIINVPLALKIMTTGYIWPISAWQELISNDLVAVSEEITVSPR	100	5e-124	gi|700082681|ref|YP_009093479.1|	photosystem I subunit III (chloroplast) [Thalassiosira weissflogii]	86.49	2e-112	sp|P49483|PSAF_ODOSI	Photosystem I reaction center subunit III OS=Odontella sinensis GN=psaF PE=3 SV=1	-	-	-	-	-	-	K02694|1|1e-75|228|ccp:CHC_25|	GO:0015979//photosynthesis		GO:0009538//photosystem I reaction center;GO:0016021//integral component of membrane;GO:0009535//chloroplast thylakoid membrane
5	PsaJ	AIR75605.1	photosystem I subunit IX (chloroplast) [Cyclotella sp. WC03_2]	4845.45	0.244	0.83	0.262	0.2537	-0.92317	AIR75605.1	MNDFQKYLSTAPVLLTLWMTFTAGFIIEINRFFPDMLGLYF	100	5e-23	gi|700658202|ref|YP_009093207.1|	photosystem I subunit IX (chloroplast) [Roundia cardiophora]	97.56	1e-23	sp|A0T0V1|PSAJ_THAPS	Photosystem I reaction center subunit IX OS=Thalassiosira pseudonana GN=psaJ PE=3 SV=1	-	-	-	-	-	-	K02697|1|7e-13|58.5|cre:ChreCp061|	GO:0015979//photosynthesis		GO:0016021//integral component of membrane;GO:0009522//photosystem I;GO:0009535//chloroplast thylakoid membrane
6	PsaL	AIR75874.1	photosystem I protein subunit XI (chloroplast) [Roundia cardiophora]	15823.3	0.054	0.44	0.214	0.03429	-2.20548	AIR75874.1	MANFIKPYNDDPFVGHLATPITSSSLTRALLKNLPAYRFGLTPLLRGLEIGLAHGYFLIGPFAQLGPLRNSEIGLLAGFFSTVGLIIILTLGLTIYGAAAFGQDKSSGQELQTKKSWDQFKGGFFVGACGSAGFAFICLSSIPTFAIN	100	5e-93	gi|700658196|ref|YP_009093201.1|	photosystem I protein subunit XI (chloroplast) [Roundia cardiophora]	94.59	7e-88	sp|A0T0U5|PSAL_THAPS	Photosystem I reaction center subunit XI OS=Thalassiosira pseudonana GN=psaL PE=3 SV=1	-	-	-	-	-	-	K02699|1|4e-56|176|ccp:CHC_925|	GO:0015979//photosynthesis		GO:0009538//photosystem I reaction center;GO:0016021//integral component of membrane;GO:0009535//chloroplast thylakoid membrane
No.	Gene	Protein_ID	Description	Mass	Protein_Coverage	Mean ratio	Std Dev	P-value	log (2) values	Protein_ID	Protein_Seqence	NCBInr Identity	NCBInr E-value	NCBInr Accession	NCBInr Description	Swissprot Identity	Swissprot E-value	Swissprot Accession	Swissprot Description	COG Score	COG E-value	COG ID	COG Function-Description	COG Code	COG Function-Categories	KEGG(ko_id|rank|evalue|score|identity|ko_definition)	GO Biological_Process	GO Molecular_Function	GO Cellular_Component
1	PetA	AIR75573.1	cytochrome f (chloroplast) [Cyclotella sp. WC03_2]	34260.9	0.277	0.56	0.089	0.005278	-1.12444	AIR75573.1	MATNKFFKSLLFTLTIAISSFGFCVENSFAYPVFAQQGYSNPRAANGKLACANCHLNQKAIEIEAPQGVLPNSVFEIEIKVPYDTTRQQISADGKPADLNVGGILILPKGFKLASKNQISAEVKAKNKGVFISPYSTEFDNILVVGPIAGKTHQELIFPVVAPDPESNPDVKYLTYPFYAGGNRGRGQVYPTGEKSNINSFGAIQAGQITEILTTEKGESKITIVNSDGTATSQTLSAGLKLLVKQGDIVKQDQPLNIDPNVGGFGQEDSEIVLQSSSRILGYLIFCLCLLLTQVLLILKKKQYEKVQAAELNF	100	0	gi|691190060|gb|AIR75573.1|	cytochrome f (chloroplast) [Cyclotella sp. WC03_2]	94.9	0	sp|A0T0R9|CYF_THAPS	Cytochrome f OS=Thalassiosira pseudonana GN=petA PE=3 SV=1	291	4e-96	COG3258	Cytochrome c	C	Energy production and conversion	K02634|1|2e-102|306|ccp:CHC_735| apocytochrome f	GO:0015979//photosynthesis;GO:0022900//electron transport chain	GO:0009055//electron carrier activity;GO:0005506//iron ion binding;GO:0020037//heme binding	GO:0031361//integral component of thylakoid membrane;GO:0009535//chloroplast thylakoid membrane
2	PetD	EJK52343.1	hypothetical protein THAOC_28390 [Thalassiosira oceanica]	17999.4	0.094	0.45	0.055	0.0009766	-1.36208	EJK52343.1	MSIIKKPDLTDPKLRAKLAKGMGHNYYGEPAWPNDLLYLFPVCILGTFACCIGLAVMAPTQMGEPADPFNTPLEILPEWYFFPTFNLLRVLPNKLLGVLAMAAVPAGLITVPFIENVNKFQNPFRRPIASLVFIFGFFFAVWFGIGACLPIDKAVSLGYW	98.75	5e-99	gi|118411155|ref|YP_874549.1|	cytochrome b6-f complex subunit IV [Thalassiosira pseudonana]	98.75	8e-100	sp|A0T0T7|PETD_THAPS	Cytochrome b6-f complex subunit 4 OS=Thalassiosira pseudonana GN=petD PE=3 SV=1	253	6e-86	COG1290	Cytochrome b subunit of the bc complex	C	Energy production and conversion	K02637|1|4e-83|246|olu:OSTLU_32458| cytochrome b6-f complex subunit 4	GO:0009767//photosynthetic electron transport chain;GO:0022904//respiratory electron transport chain	GO:0016491//oxidoreductase activity;GO:0045156//electron transporter, transferring electrons within the cyclic electron transport pathway of photosynthesis activity;GO:0045158//electron transporter, transferring electrons within cytochrome b6/f complex of photosystem II activity	GO:0016021//integral component of membrane;GO:0009535//chloroplast thylakoid membrane
		Light Harvesting Complex
No.	Complex	Protein_ID	Description	Mass	Protein_Coverage	Mean ratio	Std Dev	P-value	log (2) values	Protein_ID	Protein_Seqence	NCBInr Identity	NCBInr E-value	NCBInr Accession	NCBInr Description	Swissprot Identity	Swissprot E-value	Swissprot Accession	Swissprot Description	COG Score	COG E-value	COG ID	COG Function-Description	COG Code	COG Function-Categories	KEGG(ko_id|rank|evalue|score|identity|ko_definition)	GO Biological_Process	GO Molecular_Function	GO Cellular_Component
1	LHC I	EJK46744.1	hypothetical protein THAOC_34573 [Thalassiosira oceanica]	26715.3	0.036	0.37	0.242	0.04529	-2.85665	EJK46744.1	MKLAIAALTAATASAFAPAQTDRSSTALNVQWTEGTKALPFGSSPDTLDGSLPGDVGFDPIGFSTQPFASFNNPLYVEGNFMSDLEWLREAELAHGRIAQLAVVGFLWPGLFGTLPGAEGYADFSELNPFKALSTVPESAIYQIIGGCAWFEYQRVVRIKEQGANRVVGDIGIGYPGAFNPLNLNYTPEEFAEKQLQEIKHCRLAMIAAFGLICQANNSGTDVISQLAPAFEAPEYAAKAGYFLPQGI	100	2e-168	gi|397569437|gb|EJK46744.1|	hypothetical protein THAOC_34573 [Thalassiosira oceanica]	31.75	8e-15	sp|P04778|CB1C_ARATH	Chlorophyll a-b binding protein 1, chloroplastic OS=Arabidopsis thaliana GN=LHCB1.3 PE=1 SV=1	-	-	-	-	-	-	K08907|1|1e-26|106|ccp:CHC_T00008505001|	GO:0009765//photosynthesis, light harvesting		GO:0016020//membrane;GO:0009507//chloroplast
2		CAI44219.1	fucoxanthin chlorophyll a/c binding protein, partial [Cyclotella cryptica]	3421.61	0.312	0.37	0.182	0.02321	-2.42806	CAI44219.1	MSRSIPFLTVPEKLDGSMPGDMGFDPMGLSDI	100	6e-15	gi|84871814|emb|CAI44219.1|	fucoxanthin chlorophyll a/c binding protein [Cyclotella cryptica]	-	-	-	-	-	-	-	-	-	-	K08907|1|4e-09|51.6|ccp:CHC_T00008505001|	-	-	-
3		AAB70098.1	fucoxanthin-chlorophyll a/c light-harvesting protein, partial [Skeletonema costatum]	20722.5	0.111	0.47	0.222	0.04473	-2.12173	AAB70098.1	MKSVIFAAAIASAAAFAPAQVGKTTTSLNAFESELGAQAPLGFWDPLGFLDRADQETFDRLRYVELKHGRVSQLAFVGNLITRAGYHLPGNITPDSTFDSYPNGLAAINGADAIPTLRLIQTLAFIGFLELKVITDVTGDSQFAGDFRNGFDFGWDKQSPEWQEQKRAVELNQGRAAMMGILELMVHEQL	100	1e-124	gi|1778719|gb|AAB70098.1|	fucoxanthin-chlorophyll a/c light-harvesting protein, partial [Skeletonema costatum]	64.94	2e-73	sp|Q42395|FCP_ODOSI	Fucoxanthin-chlorophyll a-c binding protein, chloroplastic OS=Odontella sinensis GN=FCPA PE=2 SV=1	-	-	-	-	-	-	K08907|1|4e-11|63.2|gsl:Gasu_15240|	GO:0044237//cellular metabolic process		GO:0043234//protein complex;GO:0034357//photosynthetic membrane;GO:0009507//chloroplast;GO:0044425//membrane part
4		XP_002294116.1	predicted protein [Thalassiosira pseudonana CCMP1335]	76813.7	0.04	0.51	0.202	0.03852	-1.44578	XP_002294116.1	MKTTACLLSLLATTAAFAPAPISRTTTSISESKADLESLATKLNPTIRFYDPLNLSEQDFWGKGNEATIAWLRQSEIKHGRIAMFAFVGYIVQSNFVFPWAQTLSGAPHPSADLVPEAQWDAVPLGAKWQIFAVISMLELWDECGGGGVMPHYTKGRQPGKYPPFKMFRDNVHFVLDLYDPFGFNKNMSAETKERRLTAELNNGRLAQLGIFGFLCADKITGSVPALNSIAIHYDGNPMIPFEAARKWREETRSTSNLTLPRVTAMRMHQRKRGPPTLGEKSVVADVLTRETGDGIGDGDVVVVRKNHFINPSFHRYFIVWLAGCICGRLSATYDGYQRKYRASVAPWASLSSPYPKLTQHLPPTDASKRLELDLSVLDLWRTNAISVFLSEKPGKLCR…	100	0	gi|224010317|ref|XP_002294116.1|	predicted protein [Thalassiosira pseudonana CCMP1335]	30.85	3e-13	sp|Q41094|FCPF_PHATR	Fucoxanthin-chlorophyll a-c binding protein F, chloroplastic OS=Phaeodactylum tricornutum GN=FCPF PE=3 SV=1	77.4	7e-13	COG4122	Predicted O-methyltransferase YrrM	R	General function prediction only	K08907|1|2e-14|76.6|gsl:Gasu_57520|	GO:0008610//lipid biosynthetic process;GO:0032259//methylation	GO:0008168//methyltransferase activity	-
5		XP_002297311.1	photosystem I light harvesting protein, partial [Thalassiosira pseudonana CCMP1335]	15901.9	0.11	0.5	0.198	0.03389	-0.4	XP_002297311.1	FDPAGFSERAPEWINWFREAELKHGRQAMLAVVGMVVPEFVRIPGEAFSFEAIPNVLDAHDALLDTSMKQILLWISLMEAMSLGALSNMNEFDREPGNFGFDPLGMMPKDAAKAKEMQLKELKNGRLAMVAIGGMVHGAITTGHG	100	8e-103	gi|224015308|ref|XP_002297311.1|	photosystem I light harvesting protein [Thalassiosira pseudonana CCMP1335]	37.78	2e-15	sp|Q03965|L181_CHLMO	Chlorophyll a-b binding protein L1818, chloroplastic OS=Chlamydomonas moewusii GN=L1818 PE=2 SV=1	-	-	-	-	-	-	K08907|1|4e-31|116|gsl:Gasu_11630|	GO:0009765//photosynthesis, light harvesting		GO:0016020//membrane;GO:0009507//chloroplast
6		EED95211.1	fucoxanthin chlorophyll a/c protein [Thalassiosira pseudonana CCMP1335]	27423.7	0.031	0.54	0.103	0.006752	-1.24919	EED95211.1	MKSVAASLLLASTCAAFAPSNNGAAVKTSLDAMPDRMWNKMVDKTQRSASMPFLPRPINLDGSYVGDVGFDPFYLSSIDKNFAGFIQPPSWEETNGLPTLYWMREAELKHGRVAMLAWTGWLATDGALGPVPLRFPGAAYQAVPNSLSAHDIMVDQGSLGFMLVAIGIIEVCCATVLVEVSKGESDRAAGDFKLDPLQFLKGKSDADINTMKLKELQNGRAAMMAFAGVVTQAALGGTDFPYLVPYPNVADVTW	100	6e-176	gi|223996189|ref|XP_002287768.1|	fucoxanthin chlorophyll a/c protein [Thalassiosira pseudonana CCMP1335]	32.65	7e-13	sp|Q9SDM1|CB121_HORVU	Chlorophyll a-b binding protein 1B-21, chloroplastic OS=Hordeum vulgare GN=LHC Ib-21 PE=1 SV=1	-	-	-	-	-	-	K08907|1|2e-21|93.2|gsl:Gasu_11610|	GO:0009765//photosynthesis, light harvesting		GO:0016020//membrane;GO:0009507//chloroplast
7		EED93059.1	predicted protein [Thalassiosira pseudonana CCMP1335]	24247.1	0.036	0.6	0.189	0.04265	-0.72357	EED93059.1	MKSSLAFTATLLSSAHAFAPTSQWSRTSVSRNALIDDAFGVTNETGNKIPPLGRYILQDVNEDGIKWWQNAEIKNGRVAMVATIGYLVQKTGVHFPLYMGPNSSSDWLLSSTSGVTFGDVSHANALDTIAMVPSAGWLQVLFAAGLFELTAYKRQWMDGNEIPGDYGYDPLGFTKREGGWNSKELTDLRMKEIKNGRLAMITMAGWLSEESIPGSFPVWHP	100	9e-142	gi|223999699|ref|XP_002289522.1|	predicted protein [Thalassiosira pseudonana CCMP1335]	29.41	5e-14	sp|Q08584|FCPA_PHATR	Fucoxanthin-chlorophyll a-c binding protein A, chloroplastic OS=Phaeodactylum tricornutum GN=FCPA PE=2 SV=1	-	-	-	-	-	-	K08907|1|5e-18|82.4|ccp:CHC_T00009105001|	-	-	-
8		EED87666.1	predicted protein [Thalassiosira pseudonana CCMP1335]	26043.1	0.075	0.66	0.114	0.01545	-0.745885	EED87666.1	MKLSLLSVLIGSAVGFTATSSARTSVSTKAAIDDLKSIAEKSNPVLKFYDPLELSSTTIWDNTNDQTIAFLRHSEIKHGRVAMAAFVGYIVQSNGIHFPWPMSFDGTPFPYAAGSPPEQWDALSDEAKWQIILFIGFLEWFSEATGTHYMRGGVPGAYPKFSDSDVIPHPVPLNLFDPFGFSEGKSAEAKANGLIKELNNGRLAMIGIMGFISEQRVEGSVPLLKGLVAHYDGETMAPFA	100	4e-165	gi|224012467|ref|XP_002294886.1|	predicted protein [Thalassiosira pseudonana CCMP1335]	32.11	5e-17	sp|Q42395|FCP_ODOSI	Fucoxanthin-chlorophyll a-c binding protein, chloroplastic OS=Odontella sinensis GN=FCPA PE=2 SV=1	-	-	-	-	-	-	K08907|1|1e-12|68.2|gsl:Gasu_15240| !K08910|5|4e-10|62.0|cre:CHLREDRAFT_186299|	-	-	-
9		EJK58980.1	hypothetical protein THAOC_20854 [Thalassiosira oceanica]	21797.9	0.069	0.68	0.156	0.03861	-0.12921	EJK58980.1	MMKSIAALALVGSAAAFAPAPVQQKSTALYENPLANELGAQAPLGFFDPLGACADGDKENFDRLRWVELKHGRISMLAVVGYLVTYAGVRFPGAEDIPSGFAAIDATPGMVWAQFAATTAMMEAANQDQFKGPWGTNQNSLGESPAEFKGDFRNGALDFGWDKLSPEAKMRKRAIELNNGRAAQMGILGLMVHEKLGNIDAILP	100	2e-126	gi|397605353|gb|EJK58980.1|	hypothetical protein THAOC_20854 [Thalassiosira oceanica]	54.35	8e-58	sp|Q41093|FCPE_PHATR	Fucoxanthin-chlorophyll a-c binding protein E, chloroplastic OS=Phaeodactylum tricornutum GN=FCPE PE=2 SV=1	-	-	-	-	-	-	K08907|1|5e-11|63.2|gsl:Gasu_15240|			GO:0016020//membrane;GO:0044424//intracellular part
10		CAA04403.1	fucoxanthin chlorophyll a/c binding protein, partial [Cyclotella cryptica]	20937.6	0.131	0.72	0.138	0.03589	-0.801734	CAA04403.1	GSAVAFAPAATRASSSGLNAFSAADLPGALPPVGFFDPLGFAEKADEKTLKRYREAEVTHGRVAMLAVIGFLVGEAVEGSSFLFDAQISGPAITHFTQVPDGWDALIVTFIGAAEAQRAQIGWVDPADASYDQPGLLRDNYYPGDIGFDPLGLKPEDPEELNIMITKELQNGRLAMLAAAGFLAQEAVDGKGILEHFSS	100	6e-142	gi|2996375|emb|CAA04403.1|	fucoxanthin chlorophyll a/c binding protein, partial [Cyclotella cryptica]	48.35	2e-45	sp|Q03965|L181_CHLMO	Chlorophyll a-b binding protein L1818, chloroplastic OS=Chlamydomonas moewusii GN=L1818 PE=2 SV=1	-	-	-	-	-	-	K08907|1|2e-55|179|cre:CHLREDRAFT_184730| !K08908|3|2e-19|86.7|cit:102607051|	GO:0009765//photosynthesis, light harvesting		GO:0016020//membrane;GO:0009507//chloroplast
11		EJK71517.1	hypothetical protein THAOC_07036 [Thalassiosira oceanica]	18252.2	0.095	0.77	0.097	0.02473	-0.92465	EJK71517.1	MNSVWDSYVGGQDFKGGEWKWDPLKLSETYEPLVPFFREAELRHGRTAMLAVVGFIATDFVRLPGEAFSFESIPTTVGAHDALTGTALQQVAMWIGVFDTIVTAPAIAATMKGERDAGDFGIKGPKNDPDGSKMKRKQVSELLNGRLAMMAVGGIATQSVLTGHGFPYL	100	2e-122	gi|397634632|gb|EJK71517.1|	hypothetical protein THAOC_07036 [Thalassiosira oceanica]	31.9	2e-11	sp|Q08584|FCPA_PHATR	Fucoxanthin-chlorophyll a-c binding protein A, chloroplastic OS=Phaeodactylum tricornutum GN=FCPA PE=2 SV=1	-	-	-	-	-	-	K08907|1|3e-22|92.0|gsl:Gasu_11610|	-	-	-
12	LHC II	CAA04403.1	fucoxanthin chlorophyll a/c binding protein, partial [Cyclotella cryptica]	20937.6	0.131	0.72	0.138	0.03589	-0.801734	CAA04403.1	GSAVAFAPAATRASSSGLNAFSAADLPGALPPVGFFDPLGFAEKADEKTLKRYREAEVTHGRVAMLAVIGFLVGEAVEGSSFLFDAQISGPAITHFTQVPDGWDALIVTFIGAAEAQRAQIGWVDPADASYDQPGLLRDNYYPGDIGFDPLGLKPEDPEELNIMITKELQNGRLAMLAAAGFLAQEAVDGKGILEHFSS	100	6e-142	gi|2996375|emb|CAA04403.1|	fucoxanthin chlorophyll a/c binding protein, partial [Cyclotella cryptica]	48.35	2e-45	sp|Q03965|L181_CHLMO	Chlorophyll a-b binding protein L1818, chloroplastic OS=Chlamydomonas moewusii GN=L1818 PE=2 SV=1	-	-	-	-	-	-	K08907|1|2e-55|179|cre:CHLREDRAFT_184730| !K08908|3|2e-19|86.7|cit:102607051|	GO:0009765//photosynthesis, light harvesting		GO:0016020//membrane;GO:0009507//chloroplast
13	LHC IV	EED87666.1	predicted protein [Thalassiosira pseudonana CCMP1335]	26043.1	0.075	0.66	0.114	0.01545	-0.745885	EED87666.1	MKLSLLSVLIGSAVGFTATSSARTSVSTKAAIDDLKSIAEKSNPVLKFYDPLELSSTTIWDNTNDQTIAFLRHSEIKHGRVAMAAFVGYIVQSNGIHFPWPMSFDGTPFPYAAGSPPEQWDALSDEAKWQIILFIGFLEWFSEATGTHYMRGGVPGAYPKFSDSDVIPHPVPLNLFDPFGFSEGKSAEAKANGLIKELNNGRLAMIGIMGFISEQRVEGSVPLLKGLVAHYDGETMAPFA	100	4e-165	gi|224012467|ref|XP_002294886.1|	predicted protein [Thalassiosira pseudonana CCMP1335]	32.11	5e-17	sp|Q42395|FCP_ODOSI	Fucoxanthin-chlorophyll a-c binding protein, chloroplastic OS=Odontella sinensis GN=FCPA PE=2 SV=1	-	-	-	-	-	-	K08907|1|1e-12|68.2|gsl:Gasu_15240| !K08910|5|4e-10|62.0|cre:CHLREDRAFT_186299|	-	-	-
		Oxidative phosphorylation
	No	Protein_ID	Description	Mass	Protein_Coverage	Mean ratio	Std Dev	P-value	log (2) values	Protein_ID	Protein_Seqence	NCBInr Identity	NCBInr E-value	NCBInr Accession	NCBInr Description	Swissprot Identity	Swissprot E-value	Swissprot Accession	Swissprot Description	COG Score	COG E-value	COG ID	COG Function-Description	COG Code	COG Function-Categories	KEGG(ko_id|rank|evalue|score|identity|ko_definition)	GO Biological_Process	GO Molecular_Function	GO Cellular_Component
	1	AAZ99426.1	NADH dehydrogenase subunit 7 (mitochondrion) [Thalassiosira pseudonana]	46217.6	0.065	0.76	0.118	0.03473	-1.37172	AAZ99426.1	MTVKKKNLLKKIKNFTINFGPQHPAAHGVLRLVLELNGEIVNRADPHIGLLHRGTEKLIEYKNYVQALPYFDRLDYVSMMAQEHSYCLAIEKLFNCKIPERAQYIRVLFAEITRILNHLLAVGCHAMDVGAMTPFLWAFEEREKLMEFYERVSGARMHAAYFRPGGLQVDIPKGLLDDIYMFIEQFTLRLTEMEDMLTENRIWKQRLVDIGVVTAKDACQWGFSGVMLRGSGINWDLRKSQPYEVYEKLEFDIPVGTNGDCYDRYLIRVFEMKESLKIIEQCLNLMPAGYVKTNDFKISPPTRVEMKQSMEALIHHFKMYTQGVIIPSNETYIGTEAPKGEFGVYLISDNTNRPYRCKIKAPGFNHLQALDFMSKGHLIADVVTIIGTQDIVFGEVDR	100	0	gi|74325199|ref|YP_316619.1|	NADH dehydrogenase subunit 7 [Thalassiosira pseudonana]	78.65	0	sp|O21270|NDUS2_RECAM	NADH-ubiquinone oxidoreductase 49 kDa subunit OS=Reclinomonas americana GN=NAD7 PE=3 SV=1	597	0	COG0649	NADH:ubiquinone oxidoreductase 49 kD subunit (chain D)	C	Energy production and conversion	K03935|1|0.0|659|ota:OstapMp15| NADH dehydrogenase (ubiquinone) Fe-S protein 2 [EC:1.6.5.3 1.6.99.3]	GO:0019684//photosynthesis, light reaction;GO:0055114//oxidation-reduction process	GO:0051287//NAD binding;GO:0048038//quinone binding;GO:0008137//NADH dehydrogenase (ubiquinone) activity	GO:0005886//plasma membrane;GO:0005739//mitochondrion
	2	XP_002292597.1	predicted protein [Thalassiosira pseudonana CCMP1335]	23990	0.111	0.79	0.061	0.008661	-1.31765	XP_002292597.1	MNSMLRLGLATSKRSAFPCNSTSSIICRSMSDKASSTTSSLTRLDGVDELLTGTGGVPTSNKVEYAVSRVDDLVNWARKGSLWPMTFGLACCAVEMMHAAASRYDMERFGMVFRASPRQSDVMIVAGTLTNKMAPALRKVYDQMPEPRWVVSMGSCANGGGYYHYSYSVVRGCDRIVPVDIYVPGCPPTAEALLYGLLQLQKKIKGNKSLLLKLRK	100	7e-135	gi|224007275|ref|XP_002292597.1|	predicted protein [Thalassiosira pseudonana CCMP1335]	85.99	2e-86	sp|O21272|NDUS7_RECAM	NADH-ubiquinone oxidoreductase 20 kDa subunit OS=Reclinomonas americana GN=NAD10 PE=3 SV=1	274	4e-93	COG0377	NADH:ubiquinone oxidoreductase 20 kD subunit (chhain B) or related Fe-S oxidoreductase	C	Energy production and conversion	K03940|1|6e-87|257|ota:OstapMp19|	GO:0019684//photosynthesis, light reaction;GO:0055114//oxidation-reduction process	GO:0005506//iron ion binding;GO:0051539//4 iron, 4 sulfur cluster binding;GO:0048038//quinone binding;GO:0008137//NADH dehydrogenase (ubiquinone) activity	GO:0005886//plasma membrane
	3	YP_316586.1	cytochrome oxidase subunit I (mitochondrion) [Thalassiosira pseudonana]	55252.7	0.028	0.46	0.196	0.03097	-1.49242	YP_316586.1	MATYSPQLNPIYKFVTRWLFSTNHKDIGTLYLIFGAISGVAGTALSLYIRITLAQPNGSFLEYNHHLYNVIVTGHAILMIFFMVMPTLIGGFGNWFVPLMIGAPDMAFPRMNNISFWLLPPSLLLLFASMLTEAGVGTGWTVYPPLSSATAHSGGSVDLAIFSLHLSGASSILGAINFICTIFNMRVKSLSFHNLPLFVWSVLITAFLLLLSLPVLAGAITMLLTDRNFNTTFFDPAGGGDPVLFQHLFWFFGHPEVYILILPGFGIISHIVVSTAKKPIFGYLGMVYAMFSIGVLGFIVWAHHMFTVGLDIDTRAYFTAATMIIAIPTGIKIFSWLATLWGGSIDLRTPGLFAIGFIFLFTVGGVTGVVLANSGIDIALHDTYYVVAHFHYVLSMGAV…	100	0	gi|74325167|ref|YP_316586.1|	cytochrome oxidase subunit I [Thalassiosira pseudonana]	77.25	0	sp|P26856|COX1_MARPO	Cytochrome c oxidase subunit 1 OS=Marchantia polymorpha GN=COX1 PE=3 SV=2	686	0	COG0843	Heme/copper-type cytochrome/quinol oxidase, subunit 1	C	Energy production and conversion	K02256|1|0.0|701|ota:OstapMp40| cytochrome c oxidase subunit 1 [EC:1.9.3.1]	GO:0009060//aerobic respiration;GO:0006810//transport;GO:0022900//electron transport chain	GO:0005507//copper ion binding;GO:0009055//electron carrier activity;GO:0005506//iron ion binding;GO:0020037//heme binding;GO:0004129//cytochrome-c oxidase activity	GO:0005743//mitochondrial inner membrane;GO:0070469//respiratory chain;GO:0005886//plasma membrane;GO:0016021//integral component of membrane
	4	AOE43471.1	cytochrome c oxidase subunit II, partial (mitochondrion) [Thalassiosira rotula]	22253.6	0.053	0.69	0.106	0.0162	-1.20621	AOE43471.1	MIFIIQCDSPALWQTYLSDPASITMEGILIFNKHLLFLLTVIVIFVAWLLLYTIYYFVEYNNKFSSKFVHSKELEIVWTSIPALILLILSTPSFTLLYAMDEISEPELTLKILGHQWFWSYEISEFNSCQKQEQSLKYVCYMMALDGLPTTKQGYFRLLETNKRVILPTNTHLRLLVSAADVLHSWTVPS	96.84	2e-124	gi|74325171|ref|YP_316591.1|	cytochrome oxidase subunit II [Thalassiosira pseudonana]	46.52	6e-50	sp|P48869|COX2_CHOCR	Cytochrome c oxidase subunit 2 OS=Chondrus crispus GN=COX2 PE=3 SV=1	124	3e-33	COG1622	Heme/copper-type cytochrome/quinol oxidase, subunit 2	C	Energy production and conversion	K02261|1|8e-51|167|bpg:BathyMg00040|	GO:0022904//respiratory electron transport chain	GO:0005507//copper ion binding;GO:0009055//electron carrier activity;GO:0020037//heme binding;GO:0004129//cytochrome-c oxidase activity	GO:0005743//mitochondrial inner membrane;GO:0070469//respiratory chain;GO:0016021//integral component of membrane
	5	ABK20727.1	ATP synthase CF0 B chain subunit I (chloroplast) [Thalassiosira pseudonana]	19998	0.229	0.48	0.161	0.01946	-0.68254	ABK20727.1	MENFNQIFTVLAASEGIGLNLDILETGLLNILALVAILVYTGKDFLGSILQERKSTIVKSVQDAEDRLNEANRRLSEAQKQLSQAHVVISEIRNETKTAKTNLLKSDATTAKKELTTRFNRAISSFRSKERVIFLDVKQQIISLVLKRSAIQAKETFGSKKRARALINETIQKLEGDLL	100	3e-113	gi|118411110|ref|YP_874504.1|	ATP synthase CF0 B chain subunit I [Thalassiosira pseudonana]	100	6e-114	sp|A0T0P2|ATPF_THAPS	ATP synthase subunit b, chloroplastic OS=Thalassiosira pseudonana GN=atpF PE=3 SV=1	88.2	1e-20	COG0711	FoF1-type ATP synthase, membrane subunit b or b'	C	Energy production and conversion	K02111|1|1e-11|65.9|gsl:Gasu_40630| F-type H+-transporting ATPase subunit alpha [EC:3.6.3.14]!K02109|2|6e-09|56.2|ppp:PhpapaCp054| F-type H+-transporting ATPase subunit b	GO:0042777//plasma membrane ATP synthesis coupled proton transport	GO:0046933//proton-transporting ATP synthase activity, rotational mechanism;GO:0005524//ATP binding	GO:0016021//integral component of membrane;GO:0045263//proton-transporting ATP synthase complex, coupling factor F(o);GO:0009535//chloroplast thylakoid membrane;GO:0005886//plasma membrane
	6	ADB27544.1	ATP synthase CF0 subunit II B' chain (chloroplast) [Thalassiosira oceanica CCMP1005]	17353.3	0.179	0.65	0.058	0.002298	-0.75995	ADB27544.1	MINPSILISNSEVSGPGGLFDIGATLPLVAIQFILLMVLLNIILYSPLLTIIEERKEYILSHLAEASEKLAQAKELTTQYEQDLETARKEAQLEIANSQNIHKEILDIELDISQKYIDNLLETISSDLLNKKKTALDTLDSSVQALCTEVESKLSI	100	2e-106	gi|315320534|ref|YP_004072590.1|	ATP synthase CF0 subunit II B' chain [Thalassiosira oceanica CCMP1005]	92.31	4e-98	sp|A0T0P1|ATPX_THAPS	ATP synthase subunit b', chloroplastic OS=Thalassiosira pseudonana GN=atpG PE=3 SV=1	108	5e-29	COG0711	FoF1-type ATP synthase, membrane subunit b or b'	C	Energy production and conversion	K02111|1|2e-17|82.0|gsl:Gasu_40630| F-type H+-transporting ATPase subunit alpha [EC:3.6.3.14]!K02109|2|6e-16|73.9|ppp:PHYPADRAFT_142087| F-type H+-transporting ATPase subunit b	GO:0030168//platelet activation;GO:0051258//protein polymerization;GO:0015986//ATP synthesis coupled proton transport;GO:0007165//signal transduction	GO:0005102//receptor binding;GO:0015078//hydrogen ion transmembrane transporter activity;GO:0030674//protein binding, bridging;GO:0005524//ATP binding	GO:0016021//integral component of membrane;GO:0005577//fibrinogen complex;GO:0045263//proton-transporting ATP synthase complex, coupling factor F(o);GO:0009535//chloroplast thylakoid membrane
	7	XP_002294653.1	mitochondrial alternative oxidase [Thalassiosira pseudonana CCMP1335]	30003	0.102	0.76	0.141	0.05129	-1.73863	XP_002294653.1	MFTKTHGKYTKEELDIKMTHVEPESALDRLALFAVKVTRFGFDQATGWNRGSITTDKVLNRAIFLETVAAIPGMVAAIIRHFRSLRNMARDGGMLNMFLEEANNERMHLLTFIRMKDPGYLFRGAVVGSQFAFGSAFLVLYMISPAFCHRFVGYIEEEACATYTKIIKAIEEAPEGSDLAKWRTEEAPKIAKGYWHLGEEGTVLDVMRAVRADEAEHRDVNHAVSGVAHDTVNPLYDPREKMDSMMKRYVKDMMERSETKTATS	100	0	gi|224012000|ref|XP_002294653.1|	mitochondrial alternative oxidase [Thalassiosira pseudonana CCMP1335]	43.57	7e-62	sp|O74180|AOX_ASPNG	Alternative oxidase, mitochondrial OS=Aspergillus niger GN=aox1 PE=2 SV=2	134	5e-37	COG2941	Demethoxyubiquinone hydroxylase, CLK1/Coq7/Cat5 family	H	Coenzyme transport and metabolism	K01868|1|8e-56|196|csl:COCSUDRAFT_64793| threonyl-tRNA synthetase [EC:6.1.1.3]!K17893|2|7e-49|168|egu:105033544| ubiquinol oxidase [EC:1.10.3.11]	GO:0007585//respiratory gaseous exchange;GO:0055114//oxidation-reduction process		GO:0005740//mitochondrial envelope;GO:0016020//membrane
	8	YP_009093423.1	ATP synthase CF1 alpha subunit (chloroplast) [Thalassiosira weissflogii]	54149.3	0.262	0.77	0.041	0.002198	-0.339405	YP_009093423.1	MINIRPDEISSIIREQIEQYDQDVKVDNIGTVLQVGDGIARVYGLDQVMSGELLEFEDKTIGIALNLENDNVGVVLMGNGRQILEGGTVKSTGQIAQIPVGEAFLGRVVNPLGLPIDGKGEIATTESRLVESMAPGIISRKSVCEPLQTGITSIDAMIPIGRGQRELIIGDRQTGKTSIAVDTIINQKSENVVCVYVGIGQKASTIAQVVNVLEQKEAMSYTIIVSASANDPATLQYIAPYAGAALAEYFMYNGKATLIIYDDLTKQAMAYRQMSLLLRRPPGREAYPGDVFYLHSRLLERAAKLSDALGGGSMTALPIIETQASDVSAYIPTNVISITDGQIFLSNDLFNSGIRPAINVGISVSRVGSAAQTKAMKQVAGKLKLELAQFAELEAFSQF…	100	0	gi|700082625|ref|YP_009093423.1|	ATP synthase CF1 alpha subunit (chloroplast) [Thalassiosira weissflogii]	93.64	0	sp|A0T0P4|ATPA_THAPS	ATP synthase subunit alpha, chloroplastic OS=Thalassiosira pseudonana GN=atpA PE=3 SV=1	798	0	COG0056	FoF1-type ATP synthase, alpha subunit	C	Energy production and conversion	K02111|1|0.0|763|ccp:CHC_845| F-type H+-transporting ATPase subunit alpha [EC:3.6.3.14]	GO:0042777//plasma membrane ATP synthesis coupled proton transport;GO:0015991//ATP hydrolysis coupled proton transport	GO:0046933//proton-transporting ATP synthase activity, rotational mechanism;GO:0005524//ATP binding;GO:0046961//proton-transporting ATPase activity, rotational mechanism	GO:0045261//proton-transporting ATP synthase complex, catalytic core F(1);GO:0009535//chloroplast thylakoid membrane;GO:0005886//plasma membrane
	9	ABK20727.1	ATP synthase CF0 B chain subunit I (chloroplast) [Thalassiosira pseudonana]	19998	0.229	0.48	0.161	0.01946	-0.310705	ABK20727.1	MENFNQIFTVLAASEGIGLNLDILETGLLNILALVAILVYTGKDFLGSILQERKSTIVKSVQDAEDRLNEANRRLSEAQKQLSQAHVVISEIRNETKTAKTNLLKSDATTAKKELTTRFNRAISSFRSKERVIFLDVKQQIISLVLKRSAIQAKETFGSKKRARALINETIQKLEGDLL	100	3e-113	gi|118411110|ref|YP_874504.1|	ATP synthase CF0 B chain subunit I [Thalassiosira pseudonana]	100	6e-114	sp|A0T0P2|ATPF_THAPS	ATP synthase subunit b, chloroplastic OS=Thalassiosira pseudonana GN=atpF PE=3 SV=1	88.2	1e-20	COG0711	FoF1-type ATP synthase, membrane subunit b or b'	C	Energy production and conversion	K02111|1|1e-11|65.9|gsl:Gasu_40630| F-type H+-transporting ATPase subunit alpha [EC:3.6.3.14]!K02109|2|6e-09|56.2|ppp:PhpapaCp054| F-type H+-transporting ATPase subunit b	GO:0042777//plasma membrane ATP synthesis coupled proton transport	GO:0046933//proton-transporting ATP synthase activity, rotational mechanism;GO:0005524//ATP binding	GO:0016021//integral component of membrane;GO:0045263//proton-transporting ATP synthase complex, coupling factor F(o);GO:0009535//chloroplast thylakoid membrane;GO:0005886//plasma membrane
	10	ADB27544.1	ATP synthase CF0 subunit II B' chain (chloroplast) [Thalassiosira oceanica CCMP1005]	17353.3	0.179	0.65	0.058	0.002298	-0.75995	ADB27544.1	MINPSILISNSEVSGPGGLFDIGATLPLVAIQFILLMVLLNIILYSPLLTIIEERKEYILSHLAEASEKLAQAKELTTQYEQDLETARKEAQLEIANSQNIHKEILDIELDISQKYIDNLLETISSDLLNKKKTALDTLDSSVQALCTEVESKLSI	100	2e-106	gi|315320534|ref|YP_004072590.1|	ATP synthase CF0 subunit II B' chain [Thalassiosira oceanica CCMP1005]	92.31	4e-98	sp|A0T0P1|ATPX_THAPS	ATP synthase subunit b', chloroplastic OS=Thalassiosira pseudonana GN=atpG PE=3 SV=1	108	5e-29	COG0711	FoF1-type ATP synthase, membrane subunit b or b'	C	Energy production and conversion	K02111|1|2e-17|82.0|gsl:Gasu_40630| F-type H+-transporting ATPase subunit alpha [EC:3.6.3.14]!K02109|2|6e-16|73.9|ppp:PHYPADRAFT_142087| F-type H+-transporting ATPase subunit b	GO:0030168//platelet activation;GO:0051258//protein polymerization;GO:0015986//ATP synthesis coupled proton transport;GO:0007165//signal transduction	GO:0005102//receptor binding;GO:0015078//hydrogen ion transmembrane transporter activity;GO:0030674//protein binding, bridging;GO:0005524//ATP binding	GO:0016021//integral component of membrane;GO:0005577//fibrinogen complex;GO:0045263//proton-transporting ATP synthase complex, coupling factor F(o);GO:0009535//chloroplast thylakoid membrane
	11	AIR75846.1	ATP synthase CF1 epsilon subunit (chloroplast) [Roundia cardiophora]	14455.7	0.173	0.55	0.2	0.03988	-0.76921	AIR75846.1	MVMNIRVLTPDRVICSTTADEVILPGLTGQVGVLDGHATLITALDTGLLRIKLAEKWTPIILCGGLAEIDRNRVTVLVNDVEELISVELDEATKELEKATSAIENAETSKARLDASIELKKATARLEGINYLS	100	1e-89	gi|700658168|ref|YP_009093173.1|	ATP synthase CF1 epsilon subunit (chloroplast) [Roundia cardiophora]	95.49	2e-87	sp|A0T0R7|ATPE_THAPS	ATP synthase epsilon chain, chloroplastic OS=Thalassiosira pseudonana GN=atpE PE=3 SV=1	121	1e-34	COG0355	FoF1-type ATP synthase, epsilon subunit	C	Energy production and conversion	K02112|1|1e-34|129|gsl:Gasu_40560| F-type H+-transporting ATPase subunit beta [EC:3.6.3.14]!K02114|2|4e-33|116|cvr:ChvaP_p079| F-type H+-transporting ATPase subunit epsilon	GO:0042777//plasma membrane ATP synthesis coupled proton transport	GO:0046933//proton-transporting ATP synthase activity, rotational mechanism;GO:0005524//ATP binding;GO:0046961//proton-transporting ATPase activity, rotational mechanism	GO:0045261//proton-transporting ATP synthase complex, catalytic core F(1);GO:0009535//chloroplast thylakoid membrane;GO:0005886//plasma membrane
	12	EJK60670.1	hypothetical protein THAOC_18936, partial [Thalassiosira oceanica]	24034.1	0.116	0.57	0.122	0.01248	-1.20131	EJK60670.1	REVEADMILIGKKGASYFQRREFPIRAIYDCTQNPDSKQALGISEEIINSFLAGETDAVELLYTKFVSLISSTPSVRTLVPFSASEITNKGDEVFQLTSAGGDFGVERKELDVAEPQEFPNDMIFEQDPLQIVNSILPLYLNGQILRTLQESVASELAARMQSMQSASDNASALAKTLSQEYNRARQAAVTQELAGDRRRCRRSRVTGFEFEPVM	100	4e-157	gi|397610130|gb|EJK60670.1|	hypothetical protein THAOC_18936, partial [Thalassiosira oceanica]	79.69	3e-110	sp|Q06908|ATPG_ODOSI	ATP synthase gamma chain, chloroplastic OS=Odontella sinensis GN=ATPC PE=1 SV=1	207	9e-65	COG0224	FoF1-type ATP synthase, gamma subunit	C	Energy production and conversion	K02115|1|4e-74|230|ccp:CHC_T00008719001| F-type H+-transporting ATPase subunit gamma	GO:0042777//plasma membrane ATP synthesis coupled proton transport	GO:0046933//proton-transporting ATP synthase activity, rotational mechanism;GO:0005524//ATP binding;GO:0046961//proton-transporting ATPase activity, rotational mechanism	GO:0045261//proton-transporting ATP synthase complex, catalytic core F(1);GO:0009535//chloroplast thylakoid membrane;GO:0005886//plasma membrane
	13	XP_002289138.1	ATP synthase [Thalassiosira pseudonana CCMP1335]	40062.7	0.109	0.57	0.1	0.007521	-1.13465	XP_002289138.1	MKFLVVAVSALATASAFTTSPASFTTVSSPSVNNVFGQEGNAHRNRRATIVMDGKANAIRDRITSVNNTKKITSAMKLVAAAKVRRAQDSVLATRPFSETLQSVFGGLINRLGGEAADLPLLTQREVNKVTITVITGDRGLCGGYNSFMIKKAEARYKELTAQGIECDFILIGKKGASYFARREYPIRKVFDCGQNPNSKEALAISEEIINSFLSGETDAVELLYTKFVSLIASSPSVRTLVPFSASEISQKGDEVFQLTSQDGDFGVERKELEVAEPQDFPNDMIFEQDPLQIVNSILPLYLNGQILRTLQESVASELAARMQSMQSASDNAKALAKRLSQEYNRARQAAVTQEILEIVSGATALE	100	0	gi|223998931|ref|XP_002289138.1|	ATP synthase [Thalassiosira pseudonana CCMP1335]	84.23	0	sp|Q06908|ATPG_ODOSI	ATP synthase gamma chain, chloroplastic OS=Odontella sinensis GN=ATPC PE=1 SV=1	355	1e-120	COG0224	FoF1-type ATP synthase, gamma subunit	C	Energy production and conversion	K02115|1|1e-139|402|ccp:CHC_T00008719001| F-type H+-transporting ATPase subunit gamma	GO:0042777//plasma membrane ATP synthesis coupled proton transport	GO:0046933//proton-transporting ATP synthase activity, rotational mechanism;GO:0005524//ATP binding;GO:0046961//proton-transporting ATPase activity, rotational mechanism	GO:0045261//proton-transporting ATP synthase complex, catalytic core F(1);GO:0009535//chloroplast thylakoid membrane;GO:0005886//plasma membrane
	14	EED96133.1	predicted protein, partial [Thalassiosira pseudonana CCMP1335]	8709.09	0.125	2.35	0.792	0.01713	-1.73863	EED96133.1	RTTPRDARFPTQNQANHCWNRYNEWLVCLKSTQDEEGCKAMRNMAVKICPTIWTDKWDEERGEGIYPGIKTD	100	3e-49	gi|223993617|ref|XP_002286492.1|	predicted protein [Thalassiosira pseudonana CCMP1335]	38.89	2e-13	sp|P14854|CX6B1_HUMAN	Cytochrome c oxidase subunit 6B1 OS=Homo sapiens GN=COX6B1 PE=1 SV=2	-	-	-	-	-	-	K02267|1|1e-17|74.3|bpg:Bathy06g00710| cytochrome c oxidase subunit 6b		GO:0004129//cytochrome-c oxidase activity	GO:0005739//mitochondrion
	15	EJK74044.1	hypothetical protein THAOC_04305 [Thalassiosira oceanica]	22241.7	0.194	0.72	0.097	0.01606	-0.647843	EJK74044.1	MLSSTVRRAATTMGRRTMATDAAHRPPLDLYGLNARYANATFVAASKSNNLETVESELLAIKNSAENSKEFASFLENPLISRDDKTKTVTDLLSGKTTPVTTNLMTTLAGNARLNNIVGITDDYIKLMKAKRGEVEATIISAEPLNKTQEKAVSEAMKTQFPKGAKVVLKTEVNPSILGGLQIQIGDKFLDLSVGSRIEEVSRTAV	100	4e-121	gi|397640302|gb|EJK74044.1|	hypothetical protein THAOC_04305 [Thalassiosira oceanica]	39.44	2e-33	sp|Q5RD23|ATPO_PONAB	ATP synthase subunit O, mitochondrial OS=Pongo abelii GN=ATP5O PE=2 SV=1	99	2e-24	COG0712	FoF1-type ATP synthase, delta subunit	C	Energy production and conversion	K02137|1|1e-30|114|bpg:Bathy03g02500| F-type H+-transporting ATPase subunit O	GO:0042777//plasma membrane ATP synthesis coupled proton transport	GO:0046933//proton-transporting ATP synthase activity, rotational mechanism;GO:0016787//hydrolase activity	GO:0005886//plasma membrane
	16	XP_002292528.1	synthase of ATP synthase [Thalassiosira pseudonana CCMP1335]	22558.9	0.144	0.69	0.154	0.04039	-0.697678	XP_002292528.1	MFSTTLKTTLTTLTRRGLATKAPTNPHKPPLNLYGLNARYANATYIAASKSSTLEKVESELLAIKQTAESSANFRSFLENPLISRNTKTKQVEEMLAGKMSGVTLNLMTTLAGNARLNNIVGITDDYIKLMKANRGEVEATIISAEPLNKTQTEAVATAMKSQFPEGAKVILKSEVDPSIMGGLQIQIGDKFLDLSVGSRIDEVGRTVV	100	1e-134	gi|224007136|ref|XP_002292528.1|	synthase of ATP synthase [Thalassiosira pseudonana CCMP1335]	38.89	2e-38	sp|P48047|ATPO_HUMAN	ATP synthase subunit O, mitochondrial OS=Homo sapiens GN=ATP5O PE=1 SV=1	97.8	6e-24	COG0712	FoF1-type ATP synthase, delta subunit	C	Energy production and conversion	K02137|1|6e-36|128|bpg:Bathy03g02500| F-type H+-transporting ATPase subunit O	GO:0042777//plasma membrane ATP synthesis coupled proton transport	GO:0046933//proton-transporting ATP synthase activity, rotational mechanism;GO:0016787//hydrolase activity	GO:0005886//plasma membrane
		Purine and pyridimine
	No.	Protein_ID	Description	Mass	Protein_Coverage	Mean ratio	Std Dev	P-value	log (2) values	Protein_ID	Protein_Seqence	NCBInr Identity	NCBInr E-value	NCBInr Accession	NCBInr Description	Swissprot Identity	Swissprot E-value	Swissprot Accession	Swissprot Description	COG Score	COG E-value	COG ID	COG Function-Description	COG Code	COG Function-Categories	KEGG(ko_id|rank|evalue|score|identity|ko_definition)	GO Biological_Process	GO Molecular_Function	GO Cellular_Component
	1	YP_009093166.1	RNA polymerase beta (chloroplast) [Roundia cardiophora]	86059.5	0.051	0.59	0.187	0.03876	-1.28808	YP_009093166.1	MIRSEKEFDYIKIKLASPLRILQWSHRKLPNGQFVGEVQKSETINYRTFKPEMDGLFCERIFGPSKSLECACGKYKRVRYEGLICERCGVELTESRVRRHRMGHINLIYPVTHVWYTNSRPNYIALLLEVEQCEKRLDTGWTEFAYPRDNKEKDIKDITEYKLSNVGCHTYLASPKALLNCKEFLKEKSKAKKSSIVNCYDERIKRIKLASLAYFIAEDEIAFYGLHWDLQQYRRCREFGFTGYPLKPYSQSRNRRRSTPKYLLRATPNYLIGAVLIKRELEKLNLDQEIVKTRNFIMLCSKILHKEQPFYNFSHWSRKWEYQRIYKLRDNSIKRIRILENLLTTGANPAWMIITILPVIPPALRPMIQLEGGRFATSDLNELYRRIITRNNRLLRLLE…	100	0	gi|700658161|ref|YP_009093166.1|	RNA polymerase beta (chloroplast) [Roundia cardiophora]	92.75	0	sp|A0T0R0|RPOC1_THAPS	DNA-directed RNA polymerase subunit beta' OS=Thalassiosira pseudonana GN=rpoC1 PE=3 SV=1	586	0	COG0086	DNA-directed RNA polymerase, beta' subunit/160 kD subunit	K	Transcription	K03046|1|6e-175|518|ccp:CHC_800| DNA-directed RNA polymerase subunit beta' [EC:2.7.7.6]	GO:0006351//transcription, DNA-templated	GO:0003899//DNA-directed RNA polymerase activity;GO:0003677//DNA binding	GO:0009507//chloroplast
	2	EJK63460.1	hypothetical protein THAOC_15874 [Thalassiosira oceanica]	75556	0.018	0.76	0.038	0.00163	-0.32342	EJK63460.1	MRPFGELLTDMERRGILIATDYLAGVEVQARKDRVEHVETFRQWAAEQIGPDGLAMNLGSSTQLSTFLFGGAANPKTKEHSEVQRVFRTKREEIPDDAMEAYRERDAKLRETAPDAAETDEERDYGFLTKLKATDLKALCKEEGLKVSGKKQELIDRLVGAYQLKDQHKQDPSIPVSNLEEYKSMKKDDLRDAVVGRGLSPPAKAKKTDLVRLLEDDDEMQRQLMAECAKSPDADRPGGDAMVYRKMSELLEEAASSGENPMLAQILADVKAKNEEEPKWVDVTITSLGMVPDKFTVGGAPSATADVLRGLAGDPFADPPKYGKAYEFFEAKKAGSGHDACVAFYSLTAIGSIDTMIANFLTSLQALVDDRNRVHNSININTETGRLSSRKPNLQNQPA…	100	0	gi|397615480|gb|EJK63460.1|	hypothetical protein THAOC_15874 [Thalassiosira oceanica]	51.05	9e-120	sp|Q84ND9|POLIB_ARATH	DNA polymerase I B, chloroplastic/mitochondrial OS=Arabidopsis thaliana GN=POLIB PE=2 SV=1	206	1e-54	COG0749	DNA polymerase I - 3'-5' exonuclease and polymerase domains	L	Replication, recombination and repair	K02335|1|4e-126|388|dosa:Os04t0637400-01| DNA polymerase I [EC:2.7.7.7]	GO:0006260//DNA replication	GO:0003887//DNA-directed DNA polymerase activity;GO:0003677//DNA binding;GO:0008408//3'-5' exonuclease activity	GO:0005622//intracellular
	3	EJK63460.1	hypothetical protein THAOC_15874 [Thalassiosira oceanica]	75556	0.018	0.76	0.038	0.00163	-0.21036	EJK63460.1	MRPFGELLTDMERRGILIATDYLAGVEVQARKDRVEHVETFRQWAAEQIGPDGLAMNLGSSTQLSTFLFGGAANPKTKEHSEVQRVFRTKREEIPDDAMEAYRERDAKLRETAPDAAETDEERDYGFLTKLKATDLKALCKEEGLKVSGKKQELIDRLVGAYQLKDQHKQDPSIPVSNLEEYKSMKKDDLRDAVVGRGLSPPAKAKKTDLVRLLEDDDEMQRQLMAECAKSPDADRPGGDAMVYRKMSELLEEAASSGENPMLAQILADVKAKNEEEPKWVDVTITSLGMVPDKFTVGGAPSATADVLRGLAGDPFADPPKYGKAYEFFEAKKAGSGHDACVAFYSLTAIGSIDTMIANFLTSLQALVDDRNRVHNSININTETGRLSSRKPNLQNQPA…	100	0	gi|397615480|gb|EJK63460.1|	hypothetical protein THAOC_15874 [Thalassiosira oceanica]	51.05	9e-120	sp|Q84ND9|POLIB_ARATH	DNA polymerase I B, chloroplastic/mitochondrial OS=Arabidopsis thaliana GN=POLIB PE=2 SV=1	206	1e-54	COG0749	DNA polymerase I - 3'-5' exonuclease and polymerase domains	L	Replication, recombination and repair	K02335|1|4e-126|388|dosa:Os04t0637400-01| DNA polymerase I [EC:2.7.7.7]	GO:0006260//DNA replication	GO:0003887//DNA-directed DNA polymerase activity;GO:0003677//DNA binding;GO:0008408//3'-5' exonuclease activity	GO:0005622//intracellular
	4	ACI64593.1	predicted protein [Thalassiosira pseudonana CCMP1335]	62878.8	0.024	0.58	0.101	0.007734	-1.14822	ACI64593.1	MTLSLRISILIASLKIANGFTSPHFSLTSDLQITKPSHHHASLHPSVSTPSSTLSTLHMAYSPPEDAEKVKATKPKLPSPKVGDVVRYYDVDGGTTDGQTLVGKISLIQPIRPPTNNPEGTNKWLIEITEMEDVGDGYYAEYPSRKRRRSALRKLEEIAPLPASFVRTEDAYKIPMERGTNRPMPSHSGYDLIGYEGPAAVPINQDVVAADGENYDKIKYSLIRNAAIAGTVGTIFADLFKGTEDAAIYFAGALAGVAYLFFLGIKTDTVGSAEAKLGSNVSNLRFIFPVFVLVAVALKNVSSGDANPVDVPGIFSTVTPEQFGAAMIGFLTYRLPLFVSQLAPVISKSATDMLPGSAGMALQMANDAKKRGVDVAALERELLPGDDLVTVLLVSGPEA…	100	0	gi|224004450|ref|XP_002295876.1|	predicted protein [Thalassiosira pseudonana CCMP1335]	-	-	-	-	-	-	-	-	-	-	K00942|1|3e-17|89.0|ccp:CHC_T00007666001| guanylate kinase [EC:2.7.4.8]	-	-	-
	5	EJK50540.1	hypothetical protein THAOC_30460, partial [Thalassiosira oceanica]	66598	0.024	0.76	0.085	0.01596	-0.67492	EJK50540.1	GRAAGPDDVPRGPPAQHNDALPRRLRPTLPRDAGRRHVRRRRRGPVADRRGLAPRRVEAQGALVGVRRGDDGDRARGRRRAGGAGEGGGERPAVEQGFWRDVCGCYVSDEYDWMSCNASVLGLGLWPGGKRKTTAKPRDELRGRKQEHFAGHSIPLPPYVNLPSVQSIHDAASRFGLPLMLKSRKGAYDGRGNTVLKSTDDAAVSSALSDLGLTESDLPNDALYAEGWIDFRSEVAVMVVRSTTGETRAYPATTAIQTDSICRVVLVPARNVAPDVRERCESVAMAAVDCLGDGATGVFGVELFLVNKPGGGLDVLLNEVAPRPHNTGHYTQDACAVSQFENHLRAVCGLPLGDTGLVVGAAAMVNVLGAPSGGIEETMKGVNAAMTMPRTSVHWYGKG…	100	0	gi|397577316|gb|EJK50540.1|	hypothetical protein THAOC_30460, partial [Thalassiosira oceanica]	50.72	3e-127	sp|P0CQ36|PUR6_CRYNJ	Phosphoribosylaminoimidazole carboxylase OS=Cryptococcus neoformans var. neoformans serotype D (strain JEC21 / ATCC MYA-565) GN=ADE2 PE=3 SV=1	311	2e-96	COG0041	Phosphoribosylcarboxyaminoimidazole (NCAIR) mutase	F	Nucleotide transport and metabolism	K11808|1|9e-130|396|smo:SELMODRAFT_121407| phosphoribosylaminoimidazole carboxylase [EC:4.1.1.21]	GO:0006189//'de novo' IMP biosynthetic process	GO:0046872//metal ion binding;GO:0004638//phosphoribosylaminoimidazole carboxylase activity;GO:0005524//ATP binding;GO:0034023//5-(carboxyamino)imidazole ribonucleotide mutase activity	-
	6	XP_002292359.1	adenosuccinate synthase [Thalassiosira pseudonana CCMP1335]	46415.4	0.041	0.72	0.152	0.04642	-0.48231	XP_002292359.1	MLSQEYDVCARVAGGSNAGHTIVVEGKKYKFHLLPSGVLNEKATCVIGNGVVIHLPSFLNELEGLTASGINAEGRILLSDRAHLVFDFHQEADGYSEKKLGRNKIGTTKKGIGPAYASKISRNGIRIGDLKNFDFFEMRFRELAESMMRSYPGLEIDVEGQLDYYRSISERVCAMTTDTIEYTNEAYDMGKKILIEGANATMLDIDFGTYPYVTSSNPSIGSVLTGLGVSPKKIHGIYGTTKAYCTRVGEGPFPTELDRDVPGSIGEHLGVVGAEWGTTTGRSRRVGWLDIPQMKYSTLINGFTAINLTKLDVLTGLAEIKIGRAYKHNGKIINTMPSCLKTMSEIEVIYETLPGWSEDISKARNFEDLPVNAQRYVLRVQELLGVPIRWIGCGANRLD…	100	0	gi|224006798|ref|XP_002292359.1|	adenosuccinate synthase [Thalassiosira pseudonana CCMP1335]	72.99	0	sp|B7FUM7|PURA_PHATC	Adenylosuccinate synthetase OS=Phaeodactylum tricornutum (strain CCAP 1055/1) GN=PHATRDRAFT_26256 PE=3 SV=1	378	3e-127	COG0104	Adenylosuccinate synthase	F	Nucleotide transport and metabolism	K01939|1|6e-167|480|csl:COCSUDRAFT_47829| adenylosuccinate synthase [EC:6.3.4.4]	GO:0044208//'de novo' AMP biosynthetic process	GO:0004019//adenylosuccinate synthase activity;GO:0000287//magnesium ion binding;GO:0005525//GTP binding	GO:0009536//plastid
	7	XP_002289465.1	predicted protein, partial [Thalassiosira pseudonana CCMP1335]	19003.6	0.053	0.64	0.133	0.02138	-0.76291	XP_002289465.1	HRVIFILGGPGAGKGTQSEQIVSTYKCVHLSVGELLRSGAEKEEFEHAELVKECLVQGKIVPVEVSLGLLRIAMDEKANEDCDKGYGCRIFLVDGFPRNFDNVNGWIKNMPSYTAVLGALVYNCPMVVLEQRILSRAETSGRSDDNLDSAKRRFSTFQKETEPVVRALE	100	1e-123	gi|223999585|ref|XP_002289465.1|	predicted protein [Thalassiosira pseudonana CCMP1335]	42.86	1e-43	sp|Q29561|KCY_PIG	UMP-CMP kinase OS=Sus scrofa GN=CMPK1 PE=1 SV=1	125	1e-33	COG0563	Adenylate kinase or related kinase	F	Nucleotide transport and metabolism	K13800|1|2e-36|130|mis:MICPUN_88986| UMP-CMP kinase [EC:2.7.4.- 2.7.4.14]!K00939|3|5e-35|132|vcn:VOLCADRAFT_121426| adenylate kinase [EC:2.7.4.3]	GO:0006139//nucleobase-containing compound metabolic process;GO:0016310//phosphorylation	GO:0019201//nucleotide kinase activity;GO:0005524//ATP binding	-
	8	AIR75422.1	RNA polymerase beta' subunit (chloroplast) [Cyclotella sp. L04_2]	169203	0.062	0.75	0.057	0.004722	-1.24373	AIR75422.1	MKDYIYQNTLINKKQLKELLGWSFSKYDSMQASLLADELKYLGFKYATQAGISISIEDLKVPQTKNEMLEKANKDIENAEKICLKGKITNVERFQKIIDTWSIASESLKDNVVSYFKAYDPLNSVYIMAFSGARGNLSQVRQLVGMRGLMADPSGEIMRVPIKKNFREGLTITDYLMSGYGARKGIVDTALKTANSGYLTRRLIDIAQDIIIREKDCLTYSSFRIDTSNKLDNEQLIGRILLKSVYDPKTEKLITSPNTAITSELLTLFKQKSVSKFYIRSPLTCNLYHSICQMCYGWDLSNQNLVDLGEAIGILAGQSIGEPGTQLTMRTFHTGGIFTSEARQQIISPKDGIIKFSKILKTVILRTNRGEDVLVTKNSGSLILIPEQFDQSIIQIELL…	100	0	gi|691189908|gb|AIR75422.1|	RNA polymerase beta' subunit (chloroplast) [Cyclotella sp. L04_2]	82.15	0	sp|A0T0Q9|RPOC2_THAPS	DNA-directed RNA polymerase subunit beta'' OS=Thalassiosira pseudonana GN=rpoC2 PE=3 SV=1	562	4e-174	COG0086	DNA-directed RNA polymerase, beta' subunit/160 kD subunit	K	Transcription	K03046|1|9e-149|489|ccp:CHC_805| DNA-directed RNA polymerase subunit beta' [EC:2.7.7.6]	GO:0006351//transcription, DNA-templated	GO:0003899//DNA-directed RNA polymerase activity;GO:0003677//DNA binding	GO:0009507//chloroplast
	9	EJK63460.1	hypothetical protein THAOC_15874 [Thalassiosira oceanica]	75556	0.018	0.76	0.038	0.00163	-0.30327	EJK63460.1	MRPFGELLTDMERRGILIATDYLAGVEVQARKDRVEHVETFRQWAAEQIGPDGLAMNLGSSTQLSTFLFGGAANPKTKEHSEVQRVFRTKREEIPDDAMEAYRERDAKLRETAPDAAETDEERDYGFLTKLKATDLKALCKEEGLKVSGKKQELIDRLVGAYQLKDQHKQDPSIPVSNLEEYKSMKKDDLRDAVVGRGLSPPAKAKKTDLVRLLEDDDEMQRQLMAECAKSPDADRPGGDAMVYRKMSELLEEAASSGENPMLAQILADVKAKNEEEPKWVDVTITSLGMVPDKFTVGGAPSATADVLRGLAGDPFADPPKYGKAYEFFEAKKAGSGHDACVAFYSLTAIGSIDTMIANFLTSLQALVDDRNRVHNSININTETGRLSSRKPNLQNQPA…	100	0	gi|397615480|gb|EJK63460.1|	hypothetical protein THAOC_15874 [Thalassiosira oceanica]	51.05	9e-120	sp|Q84ND9|POLIB_ARATH	DNA polymerase I B, chloroplastic/mitochondrial OS=Arabidopsis thaliana GN=POLIB PE=2 SV=1	206	1e-54	COG0749	DNA polymerase I - 3'-5' exonuclease and polymerase domains	L	Replication, recombination and repair	K02335|1|4e-126|388|dosa:Os04t0637400-01| DNA polymerase I [EC:2.7.7.7]	GO:0006260//DNA replication	GO:0003887//DNA-directed DNA polymerase activity;GO:0003677//DNA binding;GO:0008408//3'-5' exonuclease activity	GO:0005622//intracellular
	10	YP_009093250.1	RNA polymerase alpha subunit (chloroplast) [Roundia cardiophora]	35312.9	0.153	0.75	0.088	0.01412	-0.553409	YP_009093250.1	MNTSNLLMECVKSEKLESGSMYGQFQIQSLMPGQGITIGNLLRRVLLGDLGGTAITGVRIAGIKDEFSLIPGVREDILEILLNLKGIVLKSKISNRQFGRLRLHGPAVITASSIQLSSEVEIINPNHYIATILDTHLLEIEFKIESGIGYRLANELFSDKFEDFIEIDAIFMPVQKVDFKIDNVYDNSATLTERLIIDVWTNGSISPEQAIFSGSKLIRDLFKFVNEQKINKEKEISQEKNSLKPRDPYIHIAIEELQLSVRPYNCLKRAQINTIGDLLEYSPEKLLELKNFGRKSADEVFATLKNKLGIVLK	100	0	gi|700658245|ref|YP_009093250.1|	RNA polymerase alpha subunit (chloroplast) [Roundia cardiophora]	85.62	0	sp|A0T0Z4|RPOA_THAPS	DNA-directed RNA polymerase subunit alpha OS=Thalassiosira pseudonana GN=rpoA PE=3 SV=1	308	5e-103	COG0202	DNA-directed RNA polymerase, alpha subunit/40 kD subunit	K	Transcription	K03040|1|7e-47|167|ppp:PHYPADRAFT_168194| DNA-directed RNA polymerase subunit alpha [EC:2.7.7.6]	GO:0006351//transcription, DNA-templated	GO:0003899//DNA-directed RNA polymerase activity;GO:0003677//DNA binding;GO:0046983//protein dimerization activity	GO:0009507//chloroplast
	11	XP_002290924.1	DNA directed RNA polymerase i, alpha subunit [Thalassiosira pseudonana CCMP1335]	185630	0.014	0.77	0.052	0.004654	-0.33102	XP_002290924.1	MANLNQAIIRHQPTSVQFGVYTDDEVRQRSVCEISSSVAYDALNTPLPRGLYDPLLGPTAGGGGGASAYCITCGNVQNLCPGHFGHIELCVPVYHPLFFPKLLLFMKMKCLACHHFRLSKRACRVFCTKLHLVDVGRMGEAMGLDEEMAALASKASVGGGDGKMSKQVKQEMMSSAAVLIDELLDQKMALRPPDGQSAEEVTHTMHERAVRRKILKEFQQACTKCLKCANCNAFSNKIRHDQFNKMFQVALPARNAKVSDVSREDFPANTKGKKKKKSTSSSTVDEEIDPTGGPISRKATVSTTKNIEASKQDNFMHALEVEAQCRLTWNNEPFLCSKFFGWGKGYTLFFLRAVPVPPSRFRPPVIMGNMTVEHSQNFYLSKVLELNARIRSAFATIHE…	100	0	gi|224002505|ref|XP_002290924.1|	DNA directed RNA polymerase i, alpha subunit [Thalassiosira pseudonana CCMP1335]	38.91	0	sp|P15398|RPA1_SCHPO	DNA-directed RNA polymerase I subunit rpa1 OS=Schizosaccharomyces pombe (strain 972 / ATCC 24843) GN=rpa1 PE=1 SV=2	430	2e-125	COG0086	DNA-directed RNA polymerase, beta' subunit/160 kD subunit	K	Transcription	K02999|1|0.0|912|mus:103990331| DNA-directed RNA polymerase I subunit RPA1 [EC:2.7.7.6]	GO:0006351//transcription, DNA-templated	GO:0003899//DNA-directed RNA polymerase activity;GO:0003677//DNA binding;GO:0008270//zinc ion binding	GO:0005634//nucleus
	12	XP_002291363.1	DNA directed RNA polymerase II, second largest subunit [Thalassiosira pseudonana CCMP1335]	136373	0.047	0.82	0.076	0.02421	-0.470907	XP_002291363.1	MDLDDMPVTQEDAWAVISAYFEEKGLVRQQLDSFDEFIQNTMQELVDDSGSIRVSPEIQHLVGYDEANFDETMNSTTKKVFEVKFGQVYLSKPTTVEKDGTVTNMFPHEARLRNLTYAAPLYVDVTMNEYRVGNDVNVGDPAEDMGEPVSTEEARKEFLGYVPIMLRSLFCVLSDKDDAQLADLGECIYDQGGYFVINGSEKVIVAQERMSNNHVYAFKKKQPSKFSWVIETRSQVENSTRPTSTLYIQMYQKGGKGAIEGNQIRSTLPYIRTDIPVVIIFRALGYVADRDIIEHVVYDLTDGEMMDLFRPSLEEAFVIQKQEVALDFIGRRGSARDVTKDDRIRYAAGILQKEVLPHVGTEEHCETKKGFFLGYAVHKLLMCKLGRADEDDRDHFGKK…	100	0	gi|224003383|ref|XP_002291363.1|	DNA directed RNA polymerase II, second largest subunit [Thalassiosira pseudonana CCMP1335]	63.29	0	sp|P38420|NRPB2_ARATH	DNA-directed RNA polymerase II subunit 2 OS=Arabidopsis thaliana GN=NRPB2 PE=1 SV=2	887	0	COG0085	DNA-directed RNA polymerase, beta subunit/140 kD subunit	K	Transcription	K03010|1|0.0|1573|nnu:104587142| DNA-directed RNA polymerase II subunit RPB2 [EC:2.7.7.6]	GO:0006351//transcription, DNA-templated	GO:0003899//DNA-directed RNA polymerase activity;GO:0003677//DNA binding;GO:0032549//ribonucleoside binding	-
	13	EJK72400.1	hypothetical protein THAOC_06073 [Thalassiosira oceanica]	18869.9	0.081	0.75	0.108	0.02609	-0.67379	EJK72400.1	MDSNSYLKPQNRVENGIPAFDVVFGPAYKGISLGALVCASLYSDFKVETSFAYNRKEAKDHGEGGILVGVSMVGKRVLIVDDVITAGTAIRESHGMLQKIDAKPVGVAIALDRAEKRSLEDPLSAVQAVARDLDIPVVSIVALPQLQEYLKQSPRYDDSVLKQVTEYRSQYGI	100	1e-123	gi|397636744|gb|EJK72400.1|	hypothetical protein THAOC_06073 [Thalassiosira oceanica]	53.94	1e-46	sp|A4VGS1|PYRE_PSEU5	Orotate phosphoribosyltransferase OS=Pseudomonas stutzeri (strain A1501) GN=pyrE PE=3 SV=1	155	1e-46	COG0461	Orotate phosphoribosyltransferase	F	Nucleotide transport and metabolism	K13421|1|4e-07|52.4|mtr:MTR_3g017580| uridine monophosphate synthetase [EC:2.4.2.10 4.1.1.23]	GO:0006207//'de novo' pyrimidine nucleobase biosynthetic process;GO:0009116//nucleoside metabolic process;GO:0006221//pyrimidine nucleotide biosynthetic process	GO:0004590//orotidine-5'-phosphate decarboxylase activity;GO:0004588//orotate phosphoribosyltransferase activity;GO:0000287//magnesium ion binding	-
	14	EJK76253.1	hypothetical protein THAOC_01996 [Thalassiosira oceanica]	168146	0.078	0.72	0.141	0.04138	-0.65644	EJK76253.1	MLRPFARGGSPAAFMNKLSGRTSNLRSTGRLMATQSGDDAAPPTALAKLHLEDGTTLTGRSFGCHESQTGEVGVVFTTGMVGYPEALTDPSYQGQIITLTTPMVGNYGVPDRTKLDKFGLPAMFESYKIHASGLIVQDYAHHYSHWKAASSLGDWLKEEGIPGLCDIDTRMLTKKIREKGALVGRIEVDLDAPPPTSWENPNEHRHLVAEVSAKEPRVYGKGNPIKIMGVDCGMKYNMIRLLVDRGCELTVVPWDHPFASDMHNYDGIFLSNGPGDPTSCKETIEQLKQAISVPDNEVKPIFGICLGNQLLGIAAGGEAKKLPFGNRGQNQPVINHATGECYITSQNHGYHIDTTTLGDDYKELFTNLNDASNEGFIHKSRPYFTAQFHPEYRNGPTDT…	100	0	gi|397644104|gb|EJK76253.1|	hypothetical protein THAOC_01996 [Thalassiosira oceanica]	55.09	0	sp|P31327|CPSM_HUMAN	Carbamoyl-phosphate synthase [ammonia], mitochondrial OS=Homo sapiens GN=CPS1 PE=1 SV=2	1527	0	COG0505	Carbamoylphosphate synthase small subunit	EF	Amino acid transport and metabolism;Nucleotide transport and metabolism	K11541|1|0.0|1505|cme:CYME_CMQ255C| carbamoyl-phosphate synthase / aspartate carbamoyltransferase [EC:6.3.5.5 2.1.3.2]!K11540|2|0.0|1459|gsl:Gasu_42540| carbamoyl-phosphate synthase / aspartate carbamoyltransferase / dihydroorotase [EC:6.3.5.5 2.1.3.2 3.5.2.3]!K01955|4|0.0|748|csl:COCSUDRAFT_25106| carbamoyl-phosphate synthase large subunit [EC:6.3.5.5]	GO:0070409//carbamoyl phosphate biosynthetic process;GO:0006543//glutamine catabolic process	GO:0046872//metal ion binding;GO:0005524//ATP binding;GO:0004088//carbamoyl-phosphate synthase (glutamine-hydrolyzing) activity	-

## Sheet: Table S4 Upregulated proteins 
Title	Quantitative proteomic analysis reveals novel insights into intracellular silicate-stress responsive mechanisms in the diatom Skeletonema dohrnii
Authors	Thangaraj Satheeswaran, Shang Xiaomei, Sun Jun*, Liu Haijiao
Table S4	Identified differentially upregulating proteins in energy, carbon, purine and pyrimidine metabolisms with fold change
			Photosynthesis
No	Gene	Protein_ID	Description	Mass	Protein_Coverage	Mean ratio	Std Dev	P-vlaue	log (2) values	Protein_ID	Protein_Seqence	NCBInr Identity	NCBInr E-value	NCBInr Accession	NCBInr Description	Swissprot Identity	Swissprot E-value	Swissprot Accession	Swissprot Description	COG Score	COG E-value	COG ID	COG Function-Description	COG Code	COG Function-Categories	KEGG(ko_id|rank|evalue|score|identity|ko_definition)	GO Biological_Process	GO Molecular_Function	GO Cellular_Component
1	PsbO	EED91332.1	oxygen-evolving enhancer protein 1 precursor [Thalassiosira pseudonana CCMP1335]	32211.5	0.134	4	1.099	0.002126	2.11409	EED91332.1	MKLVAALSLVAGVSAFAPAQTNSRSTQLNAMKDDIAKVGAAALASAAIFGITAAPAQAITKSELNQLSYLQVKGTGLANRCSEVIGEDTITPKSGARLVDMCIEPKAWAVEEEIGKAGKTEKKFVNSKVMTRQTYTLEGIEGSLKTDGGKIVFTEEEGIDYAPTTVQLPGGERVPFLFTVKELVATGNGGAFKPGFQMGGDFSVPSYRTGLFLDPKGRGGVTGYDMAVALPGLQSGEEGDAELFKENNKTFEVGNGRIEMEVNKVNAEESEIGGVFVASQSGDTDMGSKVPKKILTKGIFYAKIQ	100	0	gi|224003107|ref|XP_002291225.1|	oxygen-evolving enhancer protein 1 precursor [Thalassiosira pseudonana CCMP1335]	48.4	2e-64	sp|P12359|PSBO_SPIOL	Oxygen-evolving enhancer protein 1, chloroplastic OS=Spinacia oleracea GN=PSBO PE=1 SV=1	-	-	-	-	-	-	K02716|1|7e-94|281|ccp:CHC_T00008339001|	GO:0042549//photosystem II stabilization	GO:0005509//calcium ion binding	GO:0019898//extrinsic component of membrane;GO:0009654//photosystem II oxygen evolving complex
2	PsbV	EED86160.1	cytochrome c550, PsbV [Thalassiosira pseudonana CCMP1335]	18039.2	0.27	1.69	0.328	0.01227	0.755213	EED86160.1	MFKTYSKSFACILFCIFNIFVVSASAIDLDEATRTVVTDSSGNTTVLTPEQVKRGKRLFNATCGACHTGGITKTNPNVGLDPEALSLATPRRDNISALVDYLKNPTTYDGLESIAEIHPSIKSADIYPRMRSLTDEDLYSIAGHIMLQPKIVAEKWGGGKIYF	100	7e-120	gi|118411100|ref|YP_874494.1|	PsbV [Thalassiosira pseudonana]	100	1e-120	sp|A0T0N2|CY550_THAPS	Cytochrome c-550 OS=Thalassiosira pseudonana GN=psbV PE=3 SV=1	221	2e-73	COG2010	Cytochrome c, mono- and diheme variants	C	Energy production and conversion	K02720|1|2e-77|230|ccp:CHC_60|	GO:0019684//photosynthesis, light reaction;GO:0022904//respiratory electron transport chain;GO:0018063//cytochrome c-heme linkage	GO:0009055//electron carrier activity;GO:0020037//heme binding;GO:0005506//iron ion binding	GO:0009535//chloroplast thylakoid membrane;GO:0009523//photosystem II
3	THAPSDRAFT_2848	XP_002288025.1	predicted protein [Thalassiosira pseudonana CCMP1335]	15444	0.054	1.63	0.417	0.03488	1.12907	XP_002288025.1	MKLAVIAALVSSAAAFAPNAQPAAQTALNAESDRRSFLGAAAAFGAAALPLAANAVVDYENVALLGGSQTVDLNNANVRAYLRMPGMYPAAAGKIVTHGPYKSVADVYNIPGLTNAEKEVIKKYESRFTAKAVAPEYAIDRINNGLYR	100	1e-63	gi|223996703|ref|XP_002288025.1|	predicted protein [Thalassiosira pseudonana CCMP1335]	67.03	2e-40	sp|Q84XB6|PSBU_PHATR	Photosystem II 12 kDa extrinsic protein, chloroplastic OS=Phaeodactylum tricornutum GN=psbU PE=3 SV=1	93.6	2e-23	COG1555	DNA uptake protein ComE and related DNA-binding proteins	L	Replication, recombination and repair	K02719|1|3e-33|118|gsl:Gasu_27020|	GO:0042549//photosystem II stabilization;GO:0022900//electron transport chain		GO:0019898//extrinsic component of membrane;GO:0009535//chloroplast thylakoid membrane;GO:0009654//photosystem II oxygen evolving complex
4	PsaD	CAA10621.1	PSI ferredoxin-binding protein II (chromoplast) [Skeletonema costatum]	15532.9	0.482	1.41	0.271	0.03907	0.532532	CAA10621.1	MTLNLKTPFPTFGGSTGGWLRAAEVEEKYAITWTSAKEQIFEMPTGGSAIMRNGENLLYLARKEQCLALSTQLRTFKINDYKIYRIFPSGEVQYLHPKDGVFPEKVNPGRTSVNSRGFSIGKNPNPASIKFSGITTYES	100	9e-89	gi|14285687|sp|O96800.1|PSAD_SKECO	RecName: Full=Photosystem I reaction center subunit II; AltName: Full=Photosystem I 16 kDa polypeptide; Short=PSI-D (chloroplast) [Skeletonema costatum]	100	1e-89	sp|O96800|PSAD_SKECO	Photosystem I reaction center subunit II OS=Skeletonema costatum GN=psaD PE=3 SV=1	-	-	-	-	-	-	K02692|1|2e-65|198|ccp:CHC_665| photosystem I subunit II	GO:0015979//photosynthesis		GO:0009538//photosystem I reaction center;GO:0009535//chloroplast thylakoid membrane
			Oxidative phosporylation
	No.	Protein_ID	Description	Mass	Protein_Coverage	Mean ratio	Std Dev	P-vlaue	log (2) values	Protein_ID	Protein_Seqence	NCBInr Identity	NCBInr E-value	NCBInr Accession	NCBInr Description	Swissprot Identity	Swissprot E-value	Swissprot Accession	Swissprot Description	COG Score	COG E-value	COG ID	COG Function-Description	COG Code	COG Function-Categories	KEGG(ko_id|rank|evalue|score|identity|ko_definition)	GO Biological_Process	GO Molecular_Function	GO Cellular_Component
	1	EED89316.1	hypothetical protein THAPSDRAFT_29850 [Thalassiosira pseudonana CCMP1335]	55250.1	0.116	1.53	0.037	5.044e-05	0.628873	EED89316.1	MVFAAASAATRRAFAPRAAQNALRSMSTKGRADLLAGSGAYGGLSDQDRIFTNLYGEQDWRLKDALKRGDYHLTKEMMWMGPDWIVQEIKDSGLRGRGGAGFPSGLKWSFMPKESDGRPSFLVVNADESEPGTCKDREIMRKDPHKLIEGCLIAGYAMRARAAYIYIRGEYFNEAVVLDEAIHEAYAAGLIGKNACGSGYDFDVYLHRGAGAYICGEETALIESLEGRQGKPRLKPPFPAGVGLFGCPSTVTNVETVAVSPTILRRGASWFAGFGNPNNRGTKLFAISGHVKNPIVVEESMSIPLQELIEKHCGGMRNGWDTLQACIPGGSSVPVLNKAQCDEALMEFDDLRAKGSGLGTAAVTMFDNSVDMVGAIRRLSHFYKHESCGQCTPCREGTS…	100	0	gi|224009243|ref|XP_002293580.1|	hypothetical protein THAPSDRAFT_29850 [Thalassiosira pseudonana CCMP1335]	74.81	0	sp|Q9FNN5|NDUV1_ARATH	NADH dehydrogenase [ubiquinone] flavoprotein 1, mitochondrial OS=Arabidopsis thaliana GN=At5g08530 PE=2 SV=1	628	0	COG1894	NADH:ubiquinone oxidoreductase, NADH-binding 51 kD subunit (chain F)	C	Energy production and conversion	K03942|1|0.0|623|mis:MICPUN_94594| NADH dehydrogenase (ubiquinone) flavoprotein 1 [EC:1.6.5.3 1.6.99.3]	GO:0055114//oxidation-reduction process	GO:0051287//NAD binding;GO:0051539//4 iron, 4 sulfur cluster binding;GO:0008137//NADH dehydrogenase (ubiquinone) activity;GO:0010181//FMN binding	-
	2	YP_004072542.1	ATP synthase CF1 subunit beta (chloroplast) [Thalassiosira oceanica CCMP1005]	51155.4	0.319	7.13	3.093	0.004259	2.42388	YP_004072542.1	MVETTNKGYVSQIIGPVLDIEFPSGNLPPIYSAIKVETADGLGNIVEVQQLLGDNKVRAVSMRSTDGLKRGVEAVDLGTPISVPVGTPTLGRIFNVIGEPVDEQGDVSLDETLPIHREAPAFTELETKPSIFETGIKVVDLLAPYRRGGKIGLFGGAGVGKTVLIMELINNIAKAHGGVSVFGGVGERTREGNDLYEEMKESGVINSNNFAESKVALVYGQMNEPPGARMRVGLTALTMAEYFRDVNKQDVLLFIDNIFRFTQAGSEVSALLGRMPSAVGYQPTLATEMGALQERITSTTQGSITSIQAVYVPADDLTDPAPATTFAHLDATTVLSRNLAAKGIYPAVDPLDSTSTMLQPGIVTEEHYAIAENVKETLQRYKELQDIIAILGIDELSEE…	100	0	gi|315320486|ref|YP_004072542.1|	ATP synthase CF1 subunit beta [Thalassiosira oceanica CCMP1005]	95.15	0	sp|A0T0R6|ATPB_THAPS	ATP synthase subunit beta, chloroplastic OS=Thalassiosira pseudonana GN=atpB PE=3 SV=1	774	0	COG0055	FoF1-type ATP synthase, beta subunit	C	Energy production and conversion	K02112|1|0.0|769|ccp:CHC_765| F-type H+-transporting ATPase subunit beta [EC:3.6.3.14]	GO:0042777//plasma membrane ATP synthesis coupled proton transport;GO:0015991//ATP hydrolysis coupled proton transport	GO:0008553//hydrogen-exporting ATPase activity, phosphorylative mechanism;GO:0046933//proton-transporting ATP synthase activity, rotational mechanism;GO:0005524//ATP binding;GO:0046961//proton-transporting ATPase activity, rotational mechanism	GO:0045261//proton-transporting ATP synthase complex, catalytic core F(1);GO:0009535//chloroplast thylakoid membrane;GO:0005886//plasma membrane
	3	EJK66158.1	hypothetical protein THAOC_12933 [Thalassiosira oceanica]	13356.7	0.139	2.37	0.116	4.953e-05	0.342842	EJK66158.1	MQSGSGIQELMAAETRASQIVAEARIARGDRMKQAQVDADELIAAYRKEQEDAFLKSSSSNSGSNDVSAKVQAETNQEIQDMQGLFTKNAQKAVDVLLSKCCEVSLEVPTARVRATQKLYGK	100	4e-75	gi|397621184|gb|EJK66158.1|	hypothetical protein THAOC_12933 [Thalassiosira oceanica]	36.36	2e-12	sp|Q9WTT4|VATG2_MOUSE	V-type proton ATPase subunit G 2 OS=Mus musculus GN=Atp6v1g2 PE=1 SV=1	-	-	-	-	-	-	K02152|1|4e-10|56.2|cre:CHLREDRAFT_59366| V-type H+-transporting ATPase subunit G	GO:0015992//proton transport	GO:0016820//hydrolase activity, acting on acid anhydrides, catalyzing transmembrane movement of substances	GO:0016471//vacuolar proton-transporting V-type ATPase complex
	4	EJK48197.1	hypothetical protein THAOC_33026, partial [Thalassiosira oceanica]	13928.1	0.213	1.57	0.073	0.0003108	0.563756	EJK48197.1	EAGKLVAVIGDEVRRATTHAGYSHGIPPRWNWTQNSRIDQLLTVKQDTKADVIESTLREFTQRDDIGIILINQHLANNMRHFLTDYKQTIPTILEIPSKEHPYDPEQDFIMQRVNMFLGGGA	100	6e-88	gi|397572299|gb|EJK48197.1|	hypothetical protein THAOC_33026, partial [Thalassiosira oceanica]	49.14	2e-27	sp|Q16864|VATF_HUMAN	V-type proton ATPase subunit F OS=Homo sapiens GN=ATP6V1F PE=1 SV=2	-	-	-	-	-	-	K02151|1|1e-25|96.3|csl:COCSUDRAFT_9239| V-type H+-transporting ATPase subunit F	GO:0015992//proton transport	GO:0016787//hydrolase activity;GO:0015078//hydrogen ion transmembrane transporter activity	GO:0033178//proton-transporting two-sector ATPase complex, catalytic domain
	5	EJK53532.1	hypothetical protein THAOC_27014 [Thalassiosira oceanica]	77283.5	0.207	1.51	0.242	0.01588	0.783742	EJK53532.1	MFFFLLAGRGAAGSDPWPQDSGARGMFQFRAISGLSCAGCAGAGGMRVVGRGAAGSSTQDKTTFAAAAGGTETYLTKTGGEMSDYEQESDYGFIFKVSGPLVVADNMSGAAMYELVRVGHYKLVGEIIKLEGDTASIQVYEDTSGLTVGDPVLRKKQPLSVELGPGIMGTIFDGIQRPLEHIFQDSGDVYVPKGVDIPCLTRDVRWTFTPSAVIKEGMPVTGGDVMGIVYENEIIHSHKIIVPPNVYGTVTKIHTTGTDGQETFLVDDVVMEVYNESQDKTHYLTLSHFWPVRRPRPITEKLPGNVPLITGLRVIDGLFPSVLGGTCAVPGAFGCGKTVISQSLSKFSNSDVIVYVGCGERGNEMAEVLCDFPELTMTIKDKESGAEKEVGIMKRTTLV…	100	0	gi|397586188|gb|EJK53532.1|	hypothetical protein THAOC_27014 [Thalassiosira oceanica]	62.02	0	sp|Q5TTG1|VATA_ANOGA	V-type proton ATPase catalytic subunit A OS=Anopheles gambiae GN=Vha68-2 PE=3 SV=1	602	0	COG1155	Archaeal/vacuolar-type H+-ATPase catalytic subunit A/Vma1	C	Energy production and conversion	K02145|1|0.0|793|jcu:105646144| V-type H+-transporting ATPase subunit A [EC:3.6.3.14]	GO:0042777//plasma membrane ATP synthesis coupled proton transport;GO:0015991//ATP hydrolysis coupled proton transport	GO:0046933//proton-transporting ATP synthase activity, rotational mechanism;GO:0005524//ATP binding;GO:0046961//proton-transporting ATPase activity, rotational mechanism	GO:0033180//proton-transporting V-type ATPase, V1 domain
	6	XP_002293455.1	vacuolar proton pump alpha subunit [Thalassiosira pseudonana CCMP1335]	68736.6	0.227	1.42	0.284	0.04313	0.183621	XP_002293455.1	MTEYEKESDYGFIFKVSGPLVVADGMSGSAMYELVRVGHSKLVGEIIKLEGDTASIQVYEDTSGLTVGDPVLRKKQPLSVELGPGIMGTIFDGIQRPLEHIFQDSGDVYVPKGVDIPCLTRDVRWTFTPTTIQEGQPVTGGDVIGIVYENEIINSHKILVPPNVYGTVTKLHSTGTDGQETFSIDDVVMEVYNESQDKTHYLTLSHFWPVRRPRPIAEKLPGNVPLITGLRVIDGLFPSVLGGTCAVPGAFGCGKTVISQSLSKFSNSDVIVYVGCGERGNEMAEVLCDFPELTMTIKDEEGKEKEVGIMKRTTLVANTSNMPVAAREASIYTGITLAEYFRDQGMNVSMMGDSTSRWAEALREISGRLGEMPADSGYPAYLGARLAAFYERAGRVSCL…	100	0	gi|224008993|ref|XP_002293455.1|	vacuolar proton pump alpha subunit [Thalassiosira pseudonana CCMP1335]	61.91	0	sp|O23654|VATA_ARATH	V-type proton ATPase catalytic subunit A OS=Arabidopsis thaliana GN=VHA-A PE=1 SV=1	599	0	COG1155	Archaeal/vacuolar-type H+-ATPase catalytic subunit A/Vma1	C	Energy production and conversion	K02145|1|0.0|803|jcu:105646144| V-type H+-transporting ATPase subunit A [EC:3.6.3.14]	GO:0042777//plasma membrane ATP synthesis coupled proton transport;GO:0015991//ATP hydrolysis coupled proton transport	GO:0046933//proton-transporting ATP synthase activity, rotational mechanism;GO:0005524//ATP binding;GO:0046961//proton-transporting ATPase activity, rotational mechanism	GO:0033180//proton-transporting V-type ATPase, V1 domain
	7	EJK69682.1	hypothetical protein THAOC_09034, partial [Thalassiosira oceanica]	67537.2	0.056	1.5	0.329	0.04757	0.886977	EJK69682.1	MRSDPEVREPGDPNNMGLGWRQVCPGPEGNIVGPLLLNQLGENNLGVVVIVLVRGHPQPPSDGHDDDGHKHPDGREGDAEGHDRLSVDEGPEPALPVYAVRYLDSSPDGRQHGQLVAVDVHHLRWLVSATMAIVSKITSVSRPPVAHAWPAAASTLPSVRRHRQRAASADRGLRVQAAPKAQRREILSWRRRSSREGLPVEDIDRRSNDSGSGGQSMAISNSGQAPETSYRQLQNAAACPSAPYGEMFKLEVPSLMVGTLDSLMNLSDDLGKTDSIIESIVRKVEKSSVELAGRKGGDLTVGGVPSGRYVQQFAWDYAKFPNRRPLKELVSLIAGGVSAIDEELKQLSNSYGEKQVALQDAKRKRGGNLMTADLNDVLDEKVMRNVSVKDTEYLRTLFV…	100	0	gi|397630214|gb|EJK69682.1|	hypothetical protein THAOC_09034, partial [Thalassiosira oceanica]	32.77	1e-48	sp|Q7T385|VTC1A_DANRE	V-type proton ATPase subunit C 1-A OS=Danio rerio GN=atp6v1c1a PE=2 SV=1	-	-	-	-	-	-	K02148|1|2e-52|187|cre:CHLREDRAFT_187322| V-type H+-transporting ATPase subunit C	GO:0009987//cellular process	GO:0016820//hydrolase activity, acting on acid anhydrides, catalyzing transmembrane movement of substances	GO:0043231//intracellular membrane-bounded organelle;GO:0044444//cytoplasmic part;GO:0033180//proton-transporting V-type ATPase, V1 domain
	8	EED92420.1	v-type h-atpase [Thalassiosira pseudonana CCMP1335]	93076	0.093	0.75	0.104	0.0241	0.235193	EED92420.1	MSRWFRSEHMEYISLIVNEDAAHDCLADLGKLSAIQFTDLNPDLTPFQRRYVSYVRRCDELERKLRFFGNECDNFGLKLDTAGDIDTFLESPTALLESLEVELEGYESQLKELNAYSEKLTREYNEKVELQEVLEKARRFFMTDAPRLAVSELSGGRKPGSGSNQGLLAGAHDAEARDMDMRFSSITGVVSTEEKVRFERMIFRATRGNCYVRFAPIKQPITDPESGSLIEKCVFIVFFKSLSIETKLKKICDAFFAHRYSLPDMDDAPAVDRMLTENAQELVDSRTVLLKNQDTRFRLCQMLAQHTERWTWIVLREKAVYHTLNMFKADVSGMLRGEGWVISESFEDIRMSVNRAHSEMDHNMPSHVDQVPKPWPTPPTHFTTNKFTYGYQEFVNTYG…	100	0	gi|224001992|ref|XP_002290668.1|	v-type h-atpase [Thalassiosira pseudonana CCMP1335]	39.3	5e-180	sp|Q54E04|VATM_DICDI	Vacuolar proton translocating ATPase 100 kDa subunit OS=Dictyostelium discoideum GN=vatM PE=1 SV=2	95.9	1e-18	COG1269	Archaeal/vacuolar-type H+-ATPase subunit I/STV1	C	Energy production and conversion	K02154|1|6e-178|535|mis:MICPUN_97767| V-type H+-transporting ATPase subunit a	GO:0015991//ATP hydrolysis coupled proton transport	GO:0016787//hydrolase activity;GO:0015078//hydrogen ion transmembrane transporter activity	GO:0000220//vacuolar proton-transporting V-type ATPase, V0 domain
	9	EED93536.1	vacuolar ATPase [Thalassiosira pseudonana CCMP1335]	56066.7	0.322	1.27	0.055	0.001697	0.268145	EED93536.1	MASHADERFIPERKKLDQLSVVKDYSVVPRLEYRTIAGVNGPLVILDNVKLPKYAEIVNLTLGDGTTRSGQVLEVSGSRAVVQVFEGTSDIDNRKTRCEFTGDVLKMGVSEEMLGRSFNGSGKVIDNAPKVLPEAYLDINGQPINPSARDYPKAMIQTGISAIDVMNSVARGQKIPIFSAAGLPHNEVAAQIARQASLVKLKDTTDSHEENFAIVFGAMGVNMETARFFRSDFEESGAMQRTALFLNLANDPTIERIITPRLALTTAEYLAYERDLHVLVILTDMSSYADALREVSAAREEVPGRRGYPGYMYTDLSTIYERAGRVVGRNGSITQLPILTMPNDDITHPIPDLTGYITEGQIYLDRQLHTKGIFPPINVLPSLSRLMKSAIGEGMTRDD…	100	0	gi|224000653|ref|XP_002289999.1|	vacuolar ATPase [Thalassiosira pseudonana CCMP1335]	77	0	sp|Q5R5V5|VATB2_PONAB	V-type proton ATPase subunit B, brain isoform OS=Pongo abelii GN=ATP6V1B2 PE=2 SV=1	585	0	COG1156	Archaeal/vacuolar-type H+-ATPase subunit B/Vma2	C	Energy production and conversion	K02147|1|0.0|769|ccp:CHC_T00004901001| V-type H+-transporting ATPase subunit B	GO:0042777//plasma membrane ATP synthesis coupled proton transport;GO:0006200//ATP catabolic process;GO:0015991//ATP hydrolysis coupled proton transport	GO:0008553//hydrogen-exporting ATPase activity, phosphorylative mechanism;GO:0046933//proton-transporting ATP synthase activity, rotational mechanism;GO:0005524//ATP binding;GO:0046961//proton-transporting ATPase activity, rotational mechanism	GO:0033180//proton-transporting V-type ATPase, V1 domain
	10	EJK67319.1	hypothetical protein THAOC_11662, partial [Thalassiosira oceanica]	19020.9	0.128	1.27	0.097	0.008147	0.623414	EJK67319.1	FKQKVSEGSMTARVRVGAGIDNVAGVKLPIFTYFETGAATDNASLGLVGGGKKIQLVREKYSHLLQNLIKLASLQTSFVTLDEAMKVTNRRVNALENVTIPRIQGVLDYIDRELDELEREDFTRLKLVQGKKEVAMEEARKENEAKGVNRMKANEADITSNYDAGDDADVVF	100	7e-104	gi|397624249|gb|EJK67319.1|	hypothetical protein THAOC_11662, partial [Thalassiosira oceanica]	47.85	1e-26	sp|O97755|VATD_RABIT	V-type proton ATPase subunit D OS=Oryctolagus cuniculus GN=ATP6V1D PE=2 SV=1	80.5	2e-17	COG1394	Archaeal/vacuolar-type H+-ATPase subunit D/Vma8	C	Energy production and conversion	K02149|1|2e-29|110|apro:F751_2657| V-type H+-transporting ATPase subunit D		GO:0022857//transmembrane transporter activity;GO:0016787//hydrolase activity	-
			Carbon metabolism
	No.	Protein_ID	Description	Mass	Protein_Coverage	Mean ratio	Std Dev	P-vlaue	log (2) values	Protein_ID	Protein_Seqence	NCBInr Identity	NCBInr E-value	NCBInr Accession	NCBInr Description	Swissprot Identity	Swissprot E-value	Swissprot Accession	Swissprot Description	COG Score	COG E-value	COG ID	COG Function-Description	COG Code	COG Function-Categories	KEGG(ko_id|rank|evalue|score|identity|ko_definition)	GO Biological_Process	GO Molecular_Function	GO Cellular_Component
	1	EJK67142.1	hypothetical protein THAOC_11863 [Thalassiosira oceanica]	48620.1	0.054	1.45	0.112	0.002471	0.593572	EJK67142.1	MKARRRATALMASAVVLSRTLPSAAFQSCAERSRDTRRSTPSSSLQSSLDPQIDPLSPTSSPGPAGMKKKDLRTFQRFLEVECWKSPSIRGLDRTLLSVADACKQINRIVQRAQTDDLYGAAVDPLTGELAEVNVQGEVQQQLDVLCNTLMLRAFCGSGGVCAVASEEEPIPRSCGDVMGYENENVISDGEYVAVFDPIDGSKNIDSSLPVGTVFGIYRSPAKSGSSKLHIESFLQRGTNLVASGYCLYSATTVLVLTLGSGVHGFTLDPDKQTFLQTHPNMRIPDVGNLYSFNEAYYRDYGEPVQRFLSNMKESGTMGGKKVSARYVGALVADVHNVLINGGIYGYPATRDDPNGKLRLLYESAPMAMVMEQAGGAGSTGRGRILDVLPPQPSQDGVT…	100	0	gi|397623781|gb|EJK67142.1|	hypothetical protein THAOC_11863 [Thalassiosira oceanica]	39.49	1e-81	sp|Q07204|F16P1_BRANA	Fructose-1,6-bisphosphatase, chloroplastic OS=Brassica napus GN=FBP PE=2 SV=1	257	8e-81	COG0158	Fructose-1,6-bisphosphatase	G	Carbohydrate transport and metabolism	K03841|1|1e-86|273|ota:Ot03g00330| fructose-1,6-bisphosphatase I [EC:3.1.3.11]	GO:0019253//reductive pentose-phosphate cycle	GO:0042132//fructose 1,6-bisphosphate 1-phosphatase activity;GO:0000287//magnesium ion binding	GO:0005737//cytoplasm
	2	EJK45556.1	hypothetical protein THAOC_35826 [Thalassiosira oceanica]	33519.8	0.096	1.32	0.107	0.006513	0.529453	EJK45556.1	MKLQIVASLLSTAALVDAFSTSASIRASSTTSLYERKPFISGNWKLNPQSKDEAVALASGIAGSITESSPDAEVALFVPYVFIESAQSAVGGKLSIGAEGVCPQGNGAYTGAISAPMLNSIGVNWVLAGHSERREIFGETDEYINEQCLKIIDEGMSVMLCIGESLAEFEQDLAGSVCAVQLKKGLKGIKKEDLGRVAIAYEPVWAIGTGKVATPEIAQSVHETCRSIIAKIYDDEAAQDMRILYGGSVSPESVDDLMKQPDIDGALVGGASLDSDKFGRIINFQKRFMVTDGMQQLWDPRSASSSRTKCSGG	100	0	gi|397567387|gb|EJK45556.1|	hypothetical protein THAOC_35826 [Thalassiosira oceanica]	43.25	3e-68	sp|A5G381|TPIS_GEOUR	Triosephosphate isomerase OS=Geobacter uraniireducens (strain Rf4) GN=tpiA PE=3 SV=1	223	2e-70	COG0149	Triosephosphate isomerase	G	Carbohydrate transport and metabolism	K01803|1|2e-58|192|gmx:100812398| triosephosphate isomerase (TIM) [EC:5.3.1.1]	GO:0008152//metabolic process	GO:0004807//triose-phosphate isomerase activity	-
	3	EED95846.1	glyceraldehyde-3-phosphate dehydrogenase precursor, partial [Thalassiosira pseudonana CCMP1335]	39942.8	0.349	1.59	0.306	0.01913	0.944714	EED95846.1	KFIAALSLVAGASAYAPSAFSGSSLRATSNGSSMSMATGMGVNGFGRIGRLVTRIMMEDDDIKLSAINAGSATPDYMAYQYKYDTIHGIAKGTVDIDGDFLVLNGEKIQTSRCRDPKEVGWGALGADYVCESTGVFLTKEKAQAIIDGGAKKVIYSAPAKDDSQTIVMGVNQGEYDGSEDFISCASCTTNGLAPMVKAIHDEFDIQEALMTTVHAMTATQAVVDSSSRKDWRGGRAASGNIIPSSTGAAKAVTKVIPSLQGKLTGMAFRVPTIDVSVVDLTCKLGKATTYEEICAVIKAKSEGEMKGILGYCDEPLVSTDFESDSRSSIFDAGAGIMLNPTFVKLVAWYDNEWGYSGRVVDLMKHVAAVDAKIAA	100	0	gi|223993043|ref|XP_002286205.1|	glyceraldehyde-3-phosphate dehydrogenase precursor [Thalassiosira pseudonana CCMP1335]	71.63	3e-179	sp|O09452|G3PA_GUITH	Glyceraldehyde-3-phosphate dehydrogenase, chloroplastic OS=Guillardia theta GN=GAPC1 PE=2 SV=1	413	5e-143	COG0057	Glyceraldehyde-3-phosphate dehydrogenase/erythrose-4-phosphate dehydrogenase	G	Carbohydrate transport and metabolism	K00134|1|2e-144|416|sita:101785151| glyceraldehyde 3-phosphate dehydrogenase [EC:1.2.1.12]	GO:0019253//reductive pentose-phosphate cycle;GO:0006006//glucose metabolic process;GO:0055114//oxidation-reduction process	GO:0051287//NAD binding;GO:0050661//NADP binding;GO:0004365//glyceraldehyde-3-phosphate dehydrogenase (NAD+) (phosphorylating) activity;GO:0043891//glyceraldehyde-3-phosphate dehydrogenase (NAD(P)+) (phosphorylating) activity;GO:0047100//glyceraldehyde-3-phosphate dehydrogenase (NADP+) (phosphorylating) activity	GO:0009507//chloroplast
	4	EJK66007.1	hypothetical protein THAOC_13085 [Thalassiosira oceanica]	39860.5	0.405	1.41	0.085	0.001429	0.564571	EJK66007.1	MKFATAALLVSSASAYSFSGTSLKAASNGSSMSMATGMGVNGFGRIGRLVTRIMMEDDDCKLSAINAGSATPDYMAYQYKYDTIHGIAKGTVEVDGDFLVLNGEKIQTSRCRDPKEVGWGALGADYVCESTGVFLTKESAQSILDGGAKKVIYSAPAKDDSQTIVMGVNAEEYDGSENFISCASCTTNGLAPMVKAIHDEFDIQEALMTTVHAMTATQAVVDSSSRKDWRGGRAASGNIIPSSTGAAKAVTKVIPSLQGKLTGMAFRVPTIDVSVVDLTCKLGKETTYEEICAVIKAKSEGEMKGVLGYCDEPLVSTDFESDSRSSIFDAGAGIMLNPSFVKLVAWYDNEWGYSGRVVDLMKHVAAVDAKVAA	100	0	gi|397620938|gb|EJK66007.1|	hypothetical protein THAOC_13085 [Thalassiosira oceanica]	71.47	3e-175	sp|O09452|G3PA_GUITH	Glyceraldehyde-3-phosphate dehydrogenase, chloroplastic OS=Guillardia theta GN=GAPC1 PE=2 SV=1	407	7e-141	COG0057	Glyceraldehyde-3-phosphate dehydrogenase/erythrose-4-phosphate dehydrogenase	G	Carbohydrate transport and metabolism	K00134|1|2e-143|413|sita:101785151| glyceraldehyde 3-phosphate dehydrogenase [EC:1.2.1.12]	GO:0019253//reductive pentose-phosphate cycle;GO:0006006//glucose metabolic process;GO:0055114//oxidation-reduction process	GO:0051287//NAD binding;GO:0050661//NADP binding;GO:0004365//glyceraldehyde-3-phosphate dehydrogenase (NAD+) (phosphorylating) activity;GO:0043891//glyceraldehyde-3-phosphate dehydrogenase (NAD(P)+) (phosphorylating) activity;GO:0047100//glyceraldehyde-3-phosphate dehydrogenase (NADP+) (phosphorylating) activity	GO:0009507//chloroplast
	5	EED89527.1	nicotinate-nucleotide pyrophosphorylase, partial [Thalassiosira pseudonana CCMP1335]	31831.2	0.079	1.37	0.17	0.01583	0.446921	EED89527.1	LSSLLPPPQIEAIVFQWLQDDMPSHFDVGGHVVGISIQKAELWMKSPGILAGIPFFEQVFKVCGGCTIEWHEEAIEGTFLAADNGTNKVKLATVTGPVSHLLRGERTALNSLSRCSGVASLSNKCVQIAKKGNWHGLVAGTRKTTPGFRLIEKYGLLVGGAATHRLDLSQMVMLKDNHIWSTGSITNAVTKARKVSGFSQKIEVECQSLEEANEAAEAGADVVMLDNFTPDKLKVDAKTFKTKYPHVTVEASGGITMDTMSDYFSESVDVISLGKLTQGYDCVDFSLKIVH	100	0	gi|224008214|ref|XP_002293066.1|	nicotinate-nucleotide pyrophosphorylase [Thalassiosira pseudonana CCMP1335]	56.4	1e-96	sp|A7SG73|NADC_NEMVE	Nicotinate-nucleotide pyrophosphorylase [carboxylating] (Fragment) OS=Nematostella vectensis GN=qprt PE=3 SV=1	186	6e-56	COG0157	Nicotinate-nucleotide pyrophosphorylase	H	Coenzyme transport and metabolism	K00927|1|2e-84|271|gsl:Gasu_34520| phosphoglycerate kinase [EC:2.7.2.3]!K00767|2|5e-82|253|cme:CYME_CMO013C| nicotinate-nucleotide pyrophosphorylase (carboxylating) [EC:2.4.2.19]	GO:0009435//NAD biosynthetic process	GO:0004514//nicotinate-nucleotide diphosphorylase (carboxylating) activity	-
	6	EED93403.1	alpha enolase [Thalassiosira pseudonana CCMP1335]	46955.5	0.234	1.89	0.245	0.002391	1.11943	EED93403.1	MSAITGIHGREIIDSRGNPTVEVDITTAQGTFTASVPSGASTGAYEAVELRDGGSRYLGKGVSQAVNNVNTVLADAVKGIDVADQRAVDDAMLKADGTPNKGNLGANAILGISLAASKAGAAAKGVPLWKHYADIAGNPTPDVLPVPCFNVINGGEHAGNKLAFQEFFVIPTGAETFSESMQIGCEVFHNLKKVIKAKFGGDATLIGDEGGFAPPCDVESGLEMIMEATEAAGYLDKVSVGLDVASSEFKVPGKNQYDLDFKTKGADKDSSLLLSGDELIAFYKQLIDKYPIVTIEDPFDQDDWDNWTKICKEVGKDVQIVGDDLTVTNPVKIQEAINLGSANCLLLKVNQIGSISESIDAVKLSKQNGWGVMCSHRSGETEDFYIADLAVGLCTGEIK…	100	0	gi|224000387|ref|XP_002289866.1|	alpha enolase [Thalassiosira pseudonana CCMP1335]	60.54	0	sp|O57391|ENOG_CHICK	Gamma-enolase OS=Gallus gallus GN=ENO2 PE=2 SV=1	451	2e-155	COG0148	Enolase	G	Carbohydrate transport and metabolism	K01689|1|0.0|526|crb:CARUB_v10017251mg| enolase [EC:4.2.1.11]	GO:0006096//glycolytic process	GO:0004634//phosphopyruvate hydratase activity;GO:0000287//magnesium ion binding	GO:0009986//cell surface;GO:0000015//phosphopyruvate hydratase complex;GO:0016020//membrane
	7	EED93777.1	phosphoglycerate kinase [Thalassiosira pseudonana CCMP1335]	40988.2	0.075	1.35	0.178	0.02678	1.17326	EED93777.1	MRVDLNVPLSKGDDVTVTDDTRLRAIVPTAKFLLDKGANVILCSHFGRPKGEIIETGKNGRLNPVVGPLKELLGVDVKKVNDCIGEEVESVAKSLTKGEVLLLENTRFYKGETKNDAELAAGLGKLADYFVMDAFGTAHRAHSSTAGVAEHMKMSAAGFLLDKELKYLKGAVDEPNRPLCAIIGGAKVSTKLPVIESLLEKCDVILLGGGMIFTFYKAMGYDIGASMLEEEYVELAGKLMKQAEEKGVKLILPPDVVLADKFAEDANTAVAKASEISGDWMGLDVGPETLELFKEEIGKCNTIVFNGPMGVFEMKPFATGTITVAELMAEATERGATTIVGGGDSVAAVNQAGLGDKVSHISTGGGASLELLEGKELPGVAALSEA	100	0	gi|223997336|ref|XP_002288341.1|	phosphoglycerate kinase [Thalassiosira pseudonana CCMP1335]	58.81	8e-154	sp|Q9LD57|PGKH1_ARATH	Phosphoglycerate kinase 1, chloroplastic OS=Arabidopsis thaliana GN=PGK1 PE=1 SV=1	448	9e-156	COG0126	3-phosphoglycerate kinase	G	Carbohydrate transport and metabolism	K00927|1|6e-158|453|thj:104812374| phosphoglycerate kinase [EC:2.7.2.3]	GO:0016310//phosphorylation;GO:0006096//glycolytic process	GO:0004618//phosphoglycerate kinase activity	GO:0005737//cytoplasm;GO:0016020//membrane
	1	EJK47539.1	hypothetical protein THAOC_33731, partial [Thalassiosira oceanica]	103578	0.018	1.3	0.191	0.04141	0.248324	EJK47539.1	VSSSDDEALLRSDVRTMGALLGDAISQHHGPEVFEKIEALRSMAKASRLAEADAGGSRLGPMVDFVSGLSEPELVVISRAFAHFLGIANAAEAHQRCRRLAEDSRREGAEGHLGALHETKRDSTAGVLAGFLDGGDGVRRDRAHRAPHAGQPPHAPREARAGPDRAHRGRPDPAVGHALRAEGARRRAPAGDRVDMADGRGVEGQAQSAERGREGDAGPRDGALGGPAEVPEEARRDHEGQDGGGVRTAAQGESVQVRVVDGRRSRRGAFDDVCNLALTAHTRLAGTKGNPNVVADVTREVTLTNRLKAAELFEKDVRELMSLISGNPPRGMNDTCQTESEAMDKVRARAGVESRAPFRSYLNPVATKLGKTADWARQELSKLQGEATPANTILPEDVY…	100	0	gi|397570934|gb|EJK47539.1|	hypothetical protein THAOC_33731, partial [Thalassiosira oceanica]	44.01	2e-163	sp|Q6F6Q6|CAPP_ACIAD	Phosphoenolpyruvate carboxylase OS=Acinetobacter baylyi (strain ATCC 33305 / BD413 / ADP1) GN=ppc PE=3 SV=1	511	1e-165	COG2352	Phosphoenolpyruvate carboxylase	C	Energy production and conversion	K01595|1|8e-163|505|brp:103866650| phosphoenolpyruvate carboxylase [EC:4.1.1.31]	GO:0006107//oxaloacetate metabolic process;GO:0015977//carbon fixation;GO:0006099//tricarboxylic acid cycle	GO:0000287//magnesium ion binding;GO:0008964//phosphoenolpyruvate carboxylase activity	-
	2	XP_002287523.1	pyruvate dehydrogenase [Thalassiosira pseudonana CCMP1335]	42198.1	0.027	1.3	0.189	0.03883	0.613304	XP_002287523.1	MSTDTATFDLTGSFETYNLDTQPNNTIEMTKDELLSHFELMYTMRRMEITCDNEYKARAIRGFCHLYDGQEAVATGINAAFDPEDSWITSYRCHCTALARGGSVASVLGELFGHVDGQTKGKGGSMHFYNKAHNFFGGQGIVGAQVPVGLGLAFANHYNATPGKPMQVAIACYGDGAANQGQIWESANMASLWKLPMIFCIENNHYGMGTSMDRHSSHSDYYKMGNHIPGVRIDGMNVLAVKEGMRFVKDYVGNGNGPMYVEMMTYRYHGHSMSDPGTTYRNREEIALTRSTRDPLEFVKRTLVDAGFTDAEEIKEIEKRIRKDVANQVKQAKASSKPTVEPHLFEYVYSSDGGKEQNEFPPHIRMPDFAKSKNY	100	0	gi|223995699|ref|XP_002287523.1|	pyruvate dehydrogenase [Thalassiosira pseudonana CCMP1335]	51.55	4e-116	sp|Q6Z5N4|ODPA1_ORYSJ	Pyruvate dehydrogenase E1 component subunit alpha-1, mitochondrial OS=Oryza sativa subsp. japonica GN=Os02g0739600 PE=2 SV=1	297	2e-97	COG1071	TPP-dependent pyruvate or acetoin dehydrogenase subunit alpha	C	Energy production and conversion	K00161|1|2e-124|368|cme:CYME_CMT256C| pyruvate dehydrogenase E1 component alpha subunit [EC:1.2.4.1]	GO:0006096//glycolytic process;GO:0055114//oxidation-reduction process	GO:0004739//pyruvate dehydrogenase (acetyl-transferring) activity	GO:0043231//intracellular membrane-bounded organelle
	3	XP_002293525.1	predicted protein [Thalassiosira pseudonana CCMP1335]	28099.2	0.056	1.22	0.097	0.01503	0.692761	XP_002293525.1	MFSGMHRASLTGLAKSTVTLTNAKGMFSSTLAEYCMMACSYFAKDLPRLMQQKRNLHWEQYPVLELRGATLGVVGYGDIGRASAKLAKAYGMKVIGVKRNPVSFRDEYCDVMYGTDKLNTLMEESDYVLISTPLTEQTRNMISKEMLSNCKPSTVIINVGRGPIIDEEALIEALQNRAIKGAGLDVMTVEPLPKSSPLWKLDNVLLSPHNMDMTLTFMRESTEFFVKENLPRWLRGMEVLNQVDKVAGY	100	0	gi|224009133|ref|XP_002293525.1|	predicted protein [Thalassiosira pseudonana CCMP1335]	32.17	1e-35	sp|Q2VEQ7|DDH_HALMT	D-2-hydroxyacid dehydrogenase OS=Haloferax mediterranei (strain ATCC 33500 / DSM 1411 / JCM 8866 / NBRC 14739 / NCIMB 2177 / R-4) GN=ddh PE=1 SV=1	209	4e-65	COG0111	Phosphoglycerate dehydrogenase or related dehydrogenase	HR	Coenzyme transport and metabolism;General function prediction only	K15919|1|1e-27|111|fve:101311808| hydroxypyruvate reductase 2!K00049|2|2e-26|108|gsl:Gasu_47310| glyoxylate/hydroxypyruvate reductase [EC:1.1.1.79 1.1.1.81]	GO:0055114//oxidation-reduction process	GO:0000166//nucleotide binding;GO:0048037//cofactor binding;GO:0016616//oxidoreductase activity, acting on the CH-OH group of donors, NAD or NADP as acceptor	-
	4	EJK49309.1	hypothetical protein THAOC_31830 [Thalassiosira oceanica]	65064.7	0.091	1.91	0.33	0.005774	1.1916	EJK49309.1	MENRIDLAFTASACDMEALSDTFGQLDGEFQSESSKFALIGVAHNSQSFIHPMNKMVLFALLALLFGGADAFVPPPRISVTAPSTSKISAAAGITDYLSSLDSNPQAQSVSELLTTANFKSSQRWRKRTKQLATLGPASSSFEMIEKLFLAGADVFRLNFSHGEYDQKQELYDIIRAVEAKYDHPIAILGDLQGPKLRVGTFANPDGEMLERGQIFRFDLDETPGTNKRVMLPHPEIIEASEVGHDLLIDDGKVKVTVVATGPGYLDCEVIVPGKIKDKKGVNTPDSILEISCLTPKDRADLNFMLDLGVDWIALSFVQRPEDIVEMKGLIMSHNPNNAFPPHIMAKIEKPSCFEGDSLERIVELCDGIMVARGDLGVECAPEDVPILQKTIIEECRHQ…	100	0	gi|397574638|gb|EJK49309.1|	hypothetical protein THAOC_31830 [Thalassiosira oceanica]	47.86	4e-128	sp|P70789|KPYK1_AGRVI	Pyruvate kinase OS=Agrobacterium vitis GN=ttuE PE=2 SV=1	457	1e-154	COG0469	Pyruvate kinase	G	Carbohydrate transport and metabolism	K00873|1|5e-78|259|gsl:Gasu_48930| pyruvate kinase [EC:2.7.1.40]	GO:0044237//cellular metabolic process	GO:0016301//kinase activity;GO:0046872//metal ion binding	-
	5	EED93255.1	probable SOLUBLE pyridine nucleotide transhydrogenase [Thalassiosira pseudonana CCMP1335]	50421.7	0.082	1.46	0.291	0.038	0.683066	EED93255.1	MIGTCSWNCVLNAEVVKLLEYVFSSRIFFCTHQRNHTSVWNEIVNSCLELASSNARDTIRQLEYAGVTYVQGAAAFADSRGSSSLFITSPDMSVSTVSSDKILLATGSTPFRPGGIPFDGKRVFDSDSINTLSRLPKSVAITGSGIIAIEFAKIFKNLGSDVTLIIRDNIPRNALMKIGLDKDIAATLVADLVRSGIKIERGAQVKKFTVPRDNDKAPMVLELEAKGGGERPSGEITTLKCDIYLAAVGRKPNTMNLNLAAAGIKTDQYGGIAVDSDLRSTATGGNVYAAGDVLGRPFLASTGMAQGFAAIRRMFRDDISLAANPFAFPIGVWSSPEASYYGLSTQQCKEMGIDAGEGVALYAECLRGLVFSPNGLLKLVFDKSNGRIMGVHICGDDAC…	100	0	gi|224000091|ref|XP_002289718.1|	probable SOLUBLE pyridine nucleotide transhydrogenase [Thalassiosira pseudonana CCMP1335]	32	2e-54	sp|Q48A14|STHA_COLP3	Soluble pyridine nucleotide transhydrogenase OS=Colwellia psychrerythraea (strain 34H / ATCC BAA-681) GN=sthA PE=3 SV=1	208	4e-60	COG1249	Pyruvate/2-oxoglutarate dehydrogenase complex, dihydrolipoamide dehydrogenase (E3) component or related enzyme	C	Energy production and conversion	K00382|1|7e-43|163|vcn:VOLCADRAFT_83716| dihydrolipoamide dehydrogenase [EC:1.8.1.4]	GO:0045454//cell redox homeostasis;GO:0055114//oxidation-reduction process	GO:0050660//flavin adenine dinucleotide binding;GO:0003957//NAD(P)+ transhydrogenase (B-specific) activity;GO:0016668//oxidoreductase activity, acting on a sulfur group of donors, NAD(P) as acceptor	GO:0005737//cytoplasm
	6	EJK72804.1	hypothetical protein THAOC_05626 [Thalassiosira oceanica]	71437.5	0.04	2.31	0.706	0.01437	1.62744	EJK72804.1	MGELLEVYEASTSASLAQYKATHASSISDVSGYWSELAKSKLTWFAPFSEGLSGSFEEGSVSWFAGGRLNFVGKENETAIIWEGDEPGNVKHISFHELKNEVCKIANALKSAGVTKGDVVTLYMPMVPELCYTMLACARIGAIHSVIFAGFSADAIADRIQDAKSKWVVTASAGSRGGRNLPLKTICDAAVKKDRCVGVVEKVFVFDGKGETGSDWEVQDIHVKMTELVAAQRPVCSCEWMDAEDPLFILYTSGSTGRPKGLVHTTGGYALFAMHTTANSFGLSQQTAASTDGPKDVYACVADAGWITGHTYIVYGPLLNGCSTLMFESTPMYPDCGRYWDMVQRHKITVFYTAPTAIRSLMRFGDEAPNKYDLSSLRVLGTVGEPINPAAWKWYFDVI…	100	0	gi|397637786|gb|EJK72804.1|	hypothetical protein THAOC_05626 [Thalassiosira oceanica]	52.22	0	sp|Q54Z60|ACSA_DICDI	Acetyl-coenzyme A synthetase OS=Dictyostelium discoideum GN=acsA PE=3 SV=1	690	0	COG0365	Acyl-coenzyme A synthetase/AMP-(fatty) acid ligase	I	Lipid transport and metabolism	K01895|1|0.0|619|mus:104000631| acetyl-CoA synthetase [EC:6.2.1.1]	GO:0008152//metabolic process	GO:0003987//acetate-CoA ligase activity;GO:0016208//AMP binding	-
	1	EJK74797.1	hypothetical protein THAOC_03499 [Thalassiosira oceanica]	48911.2	0.101	1.3	0.167	0.03168	0.480354	EJK74797.1	MPALSSTMKEGKVVSWLKGEGDSVEAGEAIMVVESDKADMDVEAFEDGFIAAIITEEGEAANVGSPVALIAANEADIPALKSYAATLGGAAPVAAAPTPAPAAAAAPKASPKAAANPAASAGGRVVASPLAKKMAEEMGVDLSTVSGTGPNGRITAADVTNAASGAAPAKKAAAPVKPRLCSSTLSWTPAPGVIAATPTARALAKKAKLDLASIPGTGEFGRVTADDVKIATGQMKPKRAKAAPGAPAPVEMPEGLVPFTGMQRAVSNNMVATLDCPVFRASREIEMDAFNALYQSVKPKGVTVSALLAKAVAKAIEKHPIVNSSFREEGTFFNKDINIAMAVAIDGGLITPVLKYANERDVLDIGENWKELVGKAKSGTLSPDEYNSGTFTISNMGMF…	100	0	gi|397641689|gb|EJK74797.1|	hypothetical protein THAOC_03499 [Thalassiosira oceanica]	47.83	3e-73	sp|Q9SQI8|ODP24_ARATH	Dihydrolipoyllysine-residue acetyltransferase component 4 of pyruvate dehydrogenase complex, chloroplastic OS=Arabidopsis thaliana GN=LTA2 PE=2 SV=1	359	9e-119	COG0508	Pyruvate/2-oxoglutarate dehydrogenase complex, dihydrolipoamide acyltransferase (E2) component	C	Energy production and conversion	K00627|1|8e-93|296|ccp:CHC_T00007488001| pyruvate dehydrogenase E2 component (dihydrolipoamide acetyltransferase) [EC:2.3.1.12]	GO:0006090//pyruvate metabolic process;GO:0006694//steroid biosynthetic process;GO:0009108//coenzyme biosynthetic process;GO:0006633//fatty acid biosynthetic process;GO:0006084//acetyl-CoA metabolic process;GO:0006790//sulfur compound metabolic process;GO:0006520//cellular amino acid metabolic process;GO:0006725//cellular aromatic compound metabolic process;GO:0046483//heterocycle metabolic proce…	GO:0004742//dihydrolipoyllysine-residue acetyltransferase activity	GO:0009941//chloroplast envelope;GO:0016020//membrane;GO:0022626//cytosolic ribosome;GO:0009570//chloroplast stroma;GO:0009534//chloroplast thylakoid
	2	EJK50234.1	hypothetical protein THAOC_30825 [Thalassiosira oceanica]	54094.1	0.099	1.72	0.493	0.03596	0.717674	EJK50234.1	MMLSRAAASVTNSSSSVLRRQAAAGFSSGQPSGRWFTSTAPAMDQYDVVVVGGGPGGYVAAIKAGQMGLKTACVEMRGTLGGTCLNVGCIPSKALLTSSHHYHDAKHYFAEHGIVTGDVSMDVAKMMDAKAKTVQGLTGGIEHLLKKHKVDYFKGKGSLTGPNGVAVSLNDGGSESIDAKNIILATGSEVTPLPPVPVDNQGGKIVDSTGALDIAKIPSSMAVIGGGVIGLEMGSVWSRLGTDVTVIEFMDRLCPAMDQELTKKFQTTLKKQGFKFKLKTKVTKSEVQGDSVAITTEPSKGGDATTTNYDVVLVATGRRPYTDGLGLENLGIQTDKLGRIEVDSHFRTAVPSIYAIGDCIDGPMLAHKAEEEGIAAVETIAGFAGHVNYDAIPGVIYTF…	100	0	gi|397576396|gb|EJK50234.1|	hypothetical protein THAOC_30825 [Thalassiosira oceanica]	59.79	6e-180	sp|Q9M5K3|DLDH1_ARATH	Dihydrolipoyl dehydrogenase 1, mitochondrial OS=Arabidopsis thaliana GN=LPD1 PE=1 SV=2	576	0	COG1249	Pyruvate/2-oxoglutarate dehydrogenase complex, dihydrolipoamide dehydrogenase (E3) component or related enzyme	C	Energy production and conversion	K00382|1|0.0|551|ccp:CHC_T00010287001| dihydrolipoamide dehydrogenase [EC:1.8.1.4]	GO:0045454//cell redox homeostasis;GO:0055114//oxidation-reduction process	GO:0050660//flavin adenine dinucleotide binding;GO:0004148//dihydrolipoyl dehydrogenase activity	GO:0005737//cytoplasm
	3	EED94112.1	predicted protein [Thalassiosira pseudonana CCMP1335]	77429.1	0.067	1.33	0.071	0.001722	0.33548	EED94112.1	MKVSSIALFLLPLAHSACAWTSSPHASVSAHHRRSRSSTLAATPTFLGSTTVDAAEKVKDADALAIEAAAAAAAAAAAVTNTNERTFGTVSTSKLNKLYDLVVIGGGPAGVAGAIKAAQMGRRAILIDKPKFDAGVLPNGLDLFFGGPTGLFSKALRDSAKNTNVAAMRAQHMDSDVIWKQITNDIVKLASRNAEGQCRTLARYGIDYLQGSAQLLGEDDDKNVNALKKFKNDLDSPENGVRSVSVSNTVLVDKDGNLMEESEVTVTGTKVLVATGSKSTRLRGIPFEQSHRVFDSDTINLLGYFPRSVTISGLGIIGIEFANIFNALGVKDVKILVRGDVESSTKKLGMDMDVANELMRLLRESGVQILERTTIEEFSYVPSPEKTDEYIQMKLTDGS…	100	0	gi|223998006|ref|XP_002288676.1|	predicted protein [Thalassiosira pseudonana CCMP1335]	30.49	5e-41	sp|P9WHH5|STHA_MYCTU	Probable soluble pyridine nucleotide transhydrogenase OS=Mycobacterium tuberculosis (strain ATCC 25618 / H37Rv) GN=sthA PE=1 SV=1	202	9e-56	COG1249	Pyruvate/2-oxoglutarate dehydrogenase complex, dihydrolipoamide dehydrogenase (E3) component or related enzyme	C	Energy production and conversion	K00382|1|4e-27|119|cre:CHLREDRAFT_57890| dihydrolipoamide dehydrogenase [EC:1.8.1.4]!K00383|3|6e-27|119|bpg:Bathy01g05260| glutathione reductase (NADPH) [EC:1.8.1.7]	GO:0045454//cell redox homeostasis;GO:0055114//oxidation-reduction process	GO:0050660//flavin adenine dinucleotide binding;GO:0016491//oxidoreductase activity;GO:0005509//calcium ion binding	GO:0005737//cytoplasm
	4	EED90561.1	hypothetical protein THAPSDRAFT_14727, partial [Thalassiosira pseudonana CCMP1335]	49212.8	0.022	1.93	0.339	0.005402	0.652817	EED90561.1	ILIANRGEISIRISRAARALGARSVAVCAPEDVDSPHVGYADEFVVLERGENAIGPYLDVKGLTGVAVERGVDFVHPGYGFLSESAPFAQSLLSSNIEWVGPPPSVLELFGDKIQARALAQESGVPVVRGSGNLKSGEECLEILERGDFGLPAIMKAAYGGGGRGMRIVRSINDVLPSFSSCQREALTAFGRNEVFLEEFWEDTQHLEVQILADGHGGVVHLYERDCTVQHRHQKVIELAPARDIHPELRQRLVECAVTLAKECNYKGAGTVEFLVRGDLSSADAEFVFMEVNPRVQVEHTVTEEATGIDIVQAQLLIAGGRTLDDLGLLQENIGLRQHSLQARITMMPGKGEMLDFYQEPSGEGVRCDSAGWYTGFKPNQMYDPLVGKLICSAGDVTT…	100	0	gi|224005499|ref|XP_002291710.1|	hypothetical protein THAPSDRAFT_14727 [Thalassiosira pseudonana CCMP1335]	43.76	5e-114	sp|Q9KWU4|PYC_BACSU	Pyruvate carboxylase OS=Bacillus subtilis (strain 168) GN=pyc PE=3 SV=1	369	1e-115	COG1038	Pyruvate carboxylase	C	Energy production and conversion	K01958|1|3e-106|345|csl:COCSUDRAFT_26440| pyruvate carboxylase [EC:6.4.1.1]	GO:0008152//metabolic process	GO:0046872//metal ion binding;GO:0005524//ATP binding;GO:0004075//biotin carboxylase activity	-
	5	XP_002293997.1	succinate dehydrogenase flavoprotein subunit [Thalassiosira pseudonana CCMP1335]	69699	0.071	1.02	0.091	0.07924	1.01022	XP_002293997.1	MLSAFARRASSKATKLASTAPTPTTAVRSLSTSTTGDYTIVDHTYDALVIGAGGSGLRAAMGLSEAGFKTACVSKLFPTRSHTVAAQGGINAALGNMGPDDWRWHMYDTVKGSDWLGDQDAIHYMCREAPKAVLELEEFGLPFSRTEEGKIYQRAFGGQSLDFGKGGQAHRCCAAADRTGHAMLHTLYGRSLAFDTTYFIEYFAMDLLMTPDGQCVGAMALNMEDGTLHRIKAKNTVLATGGYGRTYFSCTSAHTCTGDGNAMAMRAGLANQDAEFVQFHPTGIYGAGCLITEGCRGEGGILRNSEGERFMERYAPSAKDLASRDVVSRAMTMEIREGRGVGPKKDHCYLHLDHLPAELLAERLPGISETAAIFAGVDVTKEPIPVLPTVHYNMGGIPT…	100	0	gi|224010078|ref|XP_002293997.1|	succinate dehydrogenase flavoprotein subunit [Thalassiosira pseudonana CCMP1335]	74.14	0	sp|O82663|SDHA1_ARATH	Succinate dehydrogenase [ubiquinone] flavoprotein subunit 1, mitochondrial OS=Arabidopsis thaliana GN=SDH1-1 PE=1 SV=1	824	0	COG1053	Succinate dehydrogenase/fumarate reductase, flavoprotein subunit	C	Energy production and conversion	K00234|1|0.0|915|ppp:PHYPADRAFT_181904| succinate dehydrogenase (ubiquinone) flavoprotein subunit [EC:1.3.5.1]	GO:0022900//electron transport chain;GO:0006099//tricarboxylic acid cycle	GO:0050660//flavin adenine dinucleotide binding;GO:0008177//succinate dehydrogenase (ubiquinone) activity	-
	6	EJK60133.1	hypothetical protein THAOC_19570, partial [Thalassiosira oceanica]	145770	0.029	1.29	0.158	0.02609	0.266058	EJK60133.1	RLSSRRRWGRRRGVSEAYRAAIGREEDRLAIHADVGRFGTDDPATWSMGDRLTFLELKFIDMLGSSIPKRSSVYRKLTLLEFKAAPRNFAIQDKQKKWKDDSAMHAPSPGGRTPNFGAAIMRVKFEVWPRGGNGRGRRSAFGSALSLPSCVRDAFPESHTCRDCLGEGRPFGKIMAANRGEIATRIMRAGSELGCGTVGIYSHEDRFTQHRYKADQAFQLNTDKSPVAAYLDIDTIVDLCCQHGVQAVHPGYGFLSENAGFAQKLEENGVKFIGPTVDNLNTFGDKTSAKELAIKAGVPVIVGSDDAFATPAQAEAWINSSPITYPVIVKAAMGGGGRGIRIVPTADDLDQMFRLASNEALNAFGDGRCFVEKYVDQPRHIEVQCLGDGTGNVIHLYDR…	100	0	gi|397608901|gb|EJK60133.1|	hypothetical protein THAOC_19570, partial [Thalassiosira oceanica]	53.32	0	sp|O17732|PYC1_CAEEL	Pyruvate carboxylase 1 OS=Caenorhabditis elegans GN=pyc-1 PE=1 SV=1	1152	0	COG1038	Pyruvate carboxylase	C	Energy production and conversion	K01958|1|0.0|1176|mis:MICPUN_96455| pyruvate carboxylase [EC:6.4.1.1]	GO:0006094//gluconeogenesis	GO:0004736//pyruvate carboxylase activity;GO:0046872//metal ion binding;GO:0005524//ATP binding;GO:0004075//biotin carboxylase activity	-
	7	XP_002289528.1	fumarate hydratase [Thalassiosira pseudonana CCMP1335]	68132.5	0.109	1.22	0.067	0.00574	0.371533	XP_002289528.1	MAAYLKRAAMIRSVRSHASSLLPSLASSTLPSASTPLIGNFISLNACNTLLDRWLSSSAGNVEVTKTSRSSSKKIKPSPPAFNYTPLFDSAPDTTTSYRQILPSSAVETVSLPDGTSLLRVSEEALRTLSSTAFEDIAHLLRPAHLAQLRKILDDPEASDNDRFVAMELLKNANIASGRILPGCQDTGTAIVMGKRGHLVLTDGNDEEHLSGGAYDAYTRSNLRYSQVAPVSMFEEKNTGTNLPAQVDIFGAKGDEYNFLFIAKGGGSANKTFLYQQTKALLNTGSLDAFLKEKIKTIGTSACPPYHLAVVIGGLSAEQNLKTVKLASTKYYDTLPTEGDPNGSGRAFRDVEWEEHILEMTRNLGIGAQFGGKYFCHDVRVVRLPRHGASCPVGIGVSC…	100	0	gi|223999711|ref|XP_002289528.1|	fumarate hydratase [Thalassiosira pseudonana CCMP1335]	60.89	0	sp|P0AC33|FUMA_ECOLI	Fumarate hydratase class I, aerobic OS=Escherichia coli (strain K12) GN=fumA PE=1 SV=2	757	0	COG1951	Tartrate dehydratase alpha subunit/Fumarate hydratase class I, N-terminal domain	C	Energy production and conversion	K01676|1|0.0|787|vcn:VOLCADRAFT_77105| fumarate hydratase, class I [EC:4.2.1.2]	GO:0006091//generation of precursor metabolites and energy	GO:0004333//fumarate hydratase activity	-
	8	EED95751.1	propionate coa-transferase [Thalassiosira pseudonana CCMP1335]	47372	0.023	0.79	0.281	0.1595	0.634923	EED95751.1	MLGDLATSNRIEAWTLPMGSISRMIRAQGTHSPGHITTVGLGTYVDPTPGVGTGGAANQLALDSPLNQELVTKLSIMGSDYLMYKALPIQVAIIRATTADSSGNLSFEHESLLCDQKNIAMAARNSGGVVLAQVKRLCAVGSLPSRSVGVPGAMVDCVCVVDEEDHDVFHRMSYTKRHDPVLCGEIKSPSDEVPKMPLDERKVIARRASFALKPGKVVNLGIGLPEGVASVAGEEGQLPFITLTTEPGVFGGLPASCQEFGPAVNADALVEMNQMFDYYDGGGLDMCFLGAAQISPQGDVNVSRMSQKKLIGPGGFINISQCTRNISFLCTFTAKGLSVDIDGDKGNLSIATEGKVKKFVNKVFETTFAGDEAVRRGQRVYYVTERAVFRRTANHRTIE…	100	0	gi|223992853|ref|XP_002286110.1|	propionate coa-transferase [Thalassiosira pseudonana CCMP1335]	41.57	1e-104	sp|F1CYZ5|CARA_ACEWO	Caffeate CoA-transferase OS=Acetobacterium woodii GN=carA PE=1 SV=1	404	6e-134	COG4670	Acyl CoA:acetate/3-ketoacid CoA transferase	I	Lipid transport and metabolism	-	GO:0046952//ketone body catabolic process	GO:0008260//3-oxoacid CoA-transferase activity	GO:0005739//mitochondrion
	9	EJK46725.1	hypothetical protein THAOC_34595 [Thalassiosira oceanica]	59914.8	0.052	1.01	0.099	0.1626	0.273581	EJK46725.1	MSVKDLTDFYEAEITDAKENDIMLSLHLKATMMKVSDPILFGHCSHALSSVKVFFKDVFDKHGEVLDEIGANPNLGLGAIYESIDSKLPADKAQEIRDDIDACYEERPWLAMVNSDKGITNLHVPSDVIIDASMPVVIRDSGQMWNKDGELEDTKCLIPDRSYATMYQEVISYCKTKGQFDVATMGNVANVGLMAQKAEEYGSHDKTFEIESQGVVMVRDKNSGEVYFEHSVNEGDLWRMAQTKDAPIKDWVRLAVERSKATGVRAIFWLDKRRAHDASLIDKVNTYLNEHDLSGTDISIMKPVDAVRATMERCTDGKDTISVTGNVLRDYLTDLFPILELGTSAKMLSIVPLLSGGGLYETGAGGSAPKHVQQFVKEGHLRWDSLGEYLATAVALEHM…	100	0	gi|397569403|gb|EJK46725.1|	hypothetical protein THAOC_34595 [Thalassiosira oceanica]	57.78	0	sp|P16100|IDH_AZOVI	Isocitrate dehydrogenase [NADP] OS=Azotobacter vinelandii GN=icd PE=1 SV=5	654	0	COG2838	Monomeric isocitrate dehydrogenase	C	Energy production and conversion	K01681|1|0.0|603|mpp:MICPUCDRAFT_70903| aconitate hydratase [EC:4.2.1.3]	GO:0006099//tricarboxylic acid cycle	GO:0004450//isocitrate dehydrogenase (NADP+) activity	-
			Purine and pyridimine
	No	Protein_ID	Description	Mass	Protein_Coverage	Mean ratio	Std Dev	P-value	log (2) values	Protein_ID	Protein_Seqence	NCBInr Identity	NCBInr E-value	NCBInr Accession	NCBInr Description	Swissprot Identity	Swissprot E-value	Swissprot Accession	Swissprot Description	COG Score	COG E-value	COG ID	COG Function-Description	COG Code	COG Function-Categories	KEGG(ko_id|rank|evalue|score|identity|ko_definition)	GO Biological_Process	GO Molecular_Function	GO Cellular_Component
	1	EED88332.1	phosphoribosylformylglycinamidine synthase [Thalassiosira pseudonana CCMP1335]	145289	0.042	1.23	0.16	0.04839	0.683521	EED88332.1	MSSIIHYYRKTETPHSLLPSLKEQLSTSSSSSTVDITSIETESCFNVQIEGALNEEDKNRLEWLLRETFCKDGLRLETSAFANVVNDDNTNNKVVLEFGPRMTFTSAFSSNATSITSACGLSKISRLERSKRYCITFSSPPTSTLIATLESLLHDRMTEQRYEVPITSFESGAKVEPVVWVKIMEEGREALERINAERGLGFDDFDLDFYTELFKEKLGRNPTDVECFDMGQSNSEHSRHWYFSGKMIIDGVEKPHTLFQMVKATLPKGIPNNSIIAFHDNSSSIRGYECQVLVPSSVSTAGKMEVVRKTMHPILTAETHNFPSAVAPFPGAETGTGGRLRDVMATGRGAYAVAGVCAYCVGNLNVPGYELPWEDKSFVYPSNLASPLEIEIEASNGAS…	100	0	gi|224011082|ref|XP_002294498.1|	phosphoribosylformylglycinamidine synthase [Thalassiosira pseudonana CCMP1335]	54.68	0	sp|Q9M8D3|PUR4_ARATH	Probable phosphoribosylformylglycinamidine synthase, chloroplastic/mitochondrial OS=Arabidopsis thaliana GN=At1g74260 PE=2 SV=3	1453	0	COG0047	Phosphoribosylformylglycinamidine (FGAM) synthase, glutamine amidotransferase domain	F	Nucleotide transport and metabolism	K01952|1|0.0|1346|osa:4324899| phosphoribosylformylglycinamidine synthase [EC:6.3.5.3]	GO:0006189//'de novo' IMP biosynthetic process	GO:0004642//phosphoribosylformylglycinamidine synthase activity	GO:0009536//plastid
	2	EJK44077.1	hypothetical protein THAOC_37410, partial [Thalassiosira oceanica]	36275.5	0.04	1.26	0.109	0.01292	1.23629	EJK44077.1	EGDSVLYATAARDKDTRDLDFLPLSVDHQERFSSAGLTSGAFNKRDGRPAEHEILVCRLIDRPLRPLIADGWRHETQLLSWVLSYDGERTCDPLAITASAAALWLSDVPLKKPVAAAMVGYVDGRLVMNPTLEQMEHSRLHLIVAGTEDAVLMIEGAADFLPEALMVEAVSFGHEAIKLQCAALEELAKVAGKEKKYDTIKTPPEGIQTAVDEAYAADVDKLYSGSMTKKELSTAQSELSKRVTEEMEELFPEETAAVKSAYKDLMCRRIFQLGKTEGVRIDGRRLDEVRPIDSEAGLLPRVHGSALFTRGETQTVATATLGDSGMKQK	100	0	gi|397564132|gb|EJK44077.1|	hypothetical protein THAOC_37410, partial [Thalassiosira oceanica]	45.05	1e-84	sp|Q6MDI2|PNP_PARUW	Polyribonucleotide nucleotidyltransferase OS=Protochlamydia amoebophila (strain UWE25) GN=pnp PE=3 SV=2	283	3e-88	COG1185	Polyribonucleotide nucleotidyltransferase (polynucleotide phosphorylase)	J	Translation, ribosomal structure and biogenesis	K00962|1|3e-81|268|nnu:104604160| polyribonucleotide nucleotidyltransferase [EC:2.7.7.8]	GO:0006402//mRNA catabolic process;GO:0006396//RNA processing	GO:0004654//polyribonucleotide nucleotidyltransferase activity;GO:0003723//RNA binding;GO:0000175//3'-5'-exoribonuclease activity	GO:0005737//cytoplasm
	3	EJK49021.1	hypothetical protein THAOC_32138 [Thalassiosira oceanica]	24312.5	0.213	1.37	0.063	0.0008032	0.187947	EJK49021.1	MALLPKKEKAGKEKRRGGRRPETTVAVRSAGAASSKLSLGLLSATGAAVTAYQFRQPPASCDKLPVHGIAGTNQERTFLAVKPDGVQRGLVGDIIARFEKRGYKLVGLKLVWPTLEMAQNHYADLSKKPFYPGLCKFFSSGPIVCMCWEGKDIINQGRQMLGETQPLASKPGSIRGDFSIDLGRNICHGSDSPEAAAHELAMWFPEGVNDWAKTVDAWVYE	100	4e-131	gi|397574083|gb|EJK49021.1|	hypothetical protein THAOC_32138 [Thalassiosira oceanica]	59.6	5e-65	sp|Q9UUY8|NDK_NEUCR	Nucleoside diphosphate kinase OS=Neurospora crassa (strain ATCC 24698 / 74-OR23-1A / CBS 708.71 / DSM 1257 / FGSC 987) GN=ndk-1 PE=2 SV=2	197	5e-63	COG0105	Nucleoside diphosphate kinase	F	Nucleotide transport and metabolism	K00940|1|3e-64|199|atr:18429227| nucleoside-diphosphate kinase [EC:2.7.4.6]	GO:0006165//nucleoside diphosphate phosphorylation;GO:0006228//UTP biosynthetic process;GO:0006183//GTP biosynthetic process;GO:0006241//CTP biosynthetic process	GO:0004550//nucleoside diphosphate kinase activity;GO:0005524//ATP binding	GO:0005737//cytoplasm
	4	XP_002291121.1	nucleoside diphosphate kinase [Thalassiosira pseudonana CCMP1335]	17377.6	0.25	1.32	0.164	0.02267	0.473347	XP_002291121.1	MNASERTYIMIKPDGVQRGIVGNIISRFETKGYKLVALKTKQATKELLDTHYCDLVEKPFFPKLRDYMMSGPVVSMIWEGKEAVATGRKMLGATNPLASEPGTIRGDFCIEVGRNICHGSDSVENAEKEIALWFEESELLDWESHSKDWIYE	100	1e-111	gi|224002899|ref|XP_002291121.1|	nucleoside diphosphate kinase [Thalassiosira pseudonana CCMP1335]	70.95	3e-76	sp|P08879|NDKA_DROME	Nucleoside diphosphate kinase OS=Drosophila melanogaster GN=awd PE=1 SV=3	202	2e-66	COG0105	Nucleoside diphosphate kinase	F	Nucleotide transport and metabolism	K00940|1|7e-70|210|vcn:VOLCADRAFT_81768| nucleoside-diphosphate kinase [EC:2.7.4.6]	GO:0006165//nucleoside diphosphate phosphorylation;GO:0050896//response to stimulus;GO:0006228//UTP biosynthetic process;GO:0006183//GTP biosynthetic process;GO:0006241//CTP biosynthetic process	GO:0004550//nucleoside diphosphate kinase activity;GO:0005524//ATP binding	GO:0043231//intracellular membrane-bounded organelle;GO:0044444//cytoplasmic part
	5	EJK49309.1	hypothetical protein THAOC_31830 [Thalassiosira oceanica]	65064.7	0.091	1.91	0.33	0.005774	1.1916	EJK49309.1	MENRIDLAFTASACDMEALSDTFGQLDGEFQSESSKFALIGVAHNSQSFIHPMNKMVLFALLALLFGGADAFVPPPRISVTAPSTSKISAAAGITDYLSSLDSNPQAQSVSELLTTANFKSSQRWRKRTKQLATLGPASSSFEMIEKLFLAGADVFRLNFSHGEYDQKQELYDIIRAVEAKYDHPIAILGDLQGPKLRVGTFANPDGEMLERGQIFRFDLDETPGTNKRVMLPHPEIIEASEVGHDLLIDDGKVKVTVVATGPGYLDCEVIVPGKIKDKKGVNTPDSILEISCLTPKDRADLNFMLDLGVDWIALSFVQRPEDIVEMKGLIMSHNPNNAFPPHIMAKIEKPSCFEGDSLERIVELCDGIMVARGDLGVECAPEDVPILQKTIIEECRHQ…	100	0	gi|397574638|gb|EJK49309.1|	hypothetical protein THAOC_31830 [Thalassiosira oceanica]	47.86	4e-128	sp|P70789|KPYK1_AGRVI	Pyruvate kinase OS=Agrobacterium vitis GN=ttuE PE=2 SV=1	457	1e-154	COG0469	Pyruvate kinase	G	Carbohydrate transport and metabolism	K00873|1|5e-78|259|gsl:Gasu_48930| pyruvate kinase [EC:2.7.1.40]	GO:0044237//cellular metabolic process	GO:0016301//kinase activity;GO:0046872//metal ion binding	-
	6	EJK46367.1	hypothetical protein THAOC_34966 [Thalassiosira oceanica]	72332.7	0.037	1.22	0.09	0.01307	0.483682	EJK46367.1	MTEEGAPPPRPVVICGPSGVGEYYSYLSAKVSCLGRLTELFCAGRRGKGTLIELLQKHFAEAHPSEASKFGFSVSHTTRKPRDGEQHGVHYNFTTVDDIKKEISEGKFVEYAEVHGNYYGTSVESVESVLSKGKICLLDIDIQGAQNVKKSSLDAYYIFISPPSMEELERRLRGRGTEKEESILKRLKNAKSEMDYGTEDNFDKVLVNNDLQQTLEDLVELFSKWFPSLLAESNGVENGNLMPPVVDPLSYPKNDEGLRALLSAIDEDCPLEGYVQTELNYKAANVKIPAGKTLDIPLPPVEHNGSKIEWSVTLVDEYNESLDLDFGLVVVVEGNEVECRKKGRIVAPANVEKEGNDDATSETDVGDDADGDQQVVSAKGKFTVANSAPVTVILKLDNS…	100	0	gi|397568826|gb|EJK46367.1|	hypothetical protein THAOC_34966 [Thalassiosira oceanica]	52.56	1e-49	sp|Q2QPW1|GMK1_ORYSJ	Guanylate kinase 1 OS=Oryza sativa subsp. japonica GN=GK1 PE=2 SV=2	163	7e-45	COG0194	Guanylate kinase	F	Nucleotide transport and metabolism	K00942|1|7e-51|179|ota:Ot12g01990| guanylate kinase [EC:2.7.4.8]	GO:0009987//cellular process	GO:0016740//transferase activity	-
	7	XP_002295180.1	predicted protein [Thalassiosira pseudonana CCMP1335]	77673.4	0.012	1.66	0.373	0.02229	1.27746	XP_002295180.1	MNHSTVTSTLLSILLLQQAVLEVDGFFFPIQQRCNTIKQSSFASTTTLQSPTATAVSTKLDVANSDMSSTNEVQTDAITNANAQTTLQSATTATDYTTKPPTPSDYCTMTTLPRHPTNEAANEILIQTEVALRNMQEKELFMACGDERGDIWSSESGRPNTTTTITTTGSSNNNIGRGVDSDNVVLPLDEEEMEIPMEVEQESVYANSYVDLGKVDTVGFDYDYTLVTYTQQLLELIYDMALKRLVEEKEYPREMLESGLRFDPFFSIRGLAVDRENGWICHLSYTHKVAVAWEGRHRVPRPRLMAEYSGKRALTPKERKTRLKPLNDLFSMAECCLMADTVQFFLDRDIPFCPRSAVNDVLGSITGTHVSGEFHRQVAREPEKFFEAKPYLKSVLDGM…	100	0	gi|224013056|ref|XP_002295180.1|	predicted protein [Thalassiosira pseudonana CCMP1335]	29.57	4e-69	sp|Q6GN91|NT5D3_XENLA	5'-nucleotidase domain-containing protein 3 OS=Xenopus laevis GN=nt5dc3 PE=2 SV=1	150	9e-37	COG1196	Chromosome segregation ATPase	D	Cell cycle control, cell division, chromosome partitioning	K01081|1|2e-41|162|gsl:Gasu_60230| 5'-nucleotidase [EC:3.1.3.5]	-	-	-
	8	XP_002289319.1	predicted protein [Thalassiosira pseudonana CCMP1335]	57601.7	0.042	1.83	0.176	0.001146	0.577391	XP_002289319.1	MSPSKKQKTDNGALWELDEETMNSGAVGFTASQIFMKNPACVAYTYDDVIMMPGHINFGLNEVDISTKLTKKISLKVPFVSSPMDTVTEHKMAISMALQGGIGIIHSNFTMEDQAEEVRKVKRFKNGFITDPICLSPSSTVGDVIELKEKHGYSGIPITDNGRMGGKLVGIVSNRDITFVDDRTMKLEEIMTPRDKLSVAKQGVELIEANEILKETKKGKLPVVNDADELVALIARTDLLKNIEFSQASKDHVTKQLLVGAAIGTRLEDRDRAAALVEAGVDVIVVDSSQGDSLYQLDIVKHLKASHPKLQVIAGNIVTPLQAIHLIQAGADGLRVGMGIGSICTTQEVCAVGRAQASAVYHVAKFARKHGVPILADGGIKSTGHITKALSLGASCVMM…	100	0	gi|223999293|ref|XP_002289319.1|	predicted protein [Thalassiosira pseudonana CCMP1335]	60	0	sp|Q54QQ0|IMDH_DICDI	Inosine-5'-monophosphate dehydrogenase OS=Dictyostelium discoideum GN=impdh PE=1 SV=1	564	0	COG0517	CBS domain	T	Signal transduction mechanisms	K00088|1|0.0|619|cme:CYME_CML243C| IMP dehydrogenase [EC:1.1.1.205]	GO:0006177//GMP biosynthetic process;GO:0055114//oxidation-reduction process	GO:0003938//IMP dehydrogenase activity;GO:0046872//metal ion binding	-
	9	EJK45149.1	hypothetical protein THAOC_36256 [Thalassiosira oceanica]	57765.6	0.124	1.46	0.045	0.0001458	0.362442	EJK45149.1	MSAKKHKTANGHTDGDALWELDEETLNSGAVGFTASQLFIKNPACVAYTYDDVIMMPGHINFGLNEVDISTKLTKGISIKLPFVSSPMDTVTENKMAISMALQGGIGIIHSNFSIEDQAAEVRKVKRYENGFITDPICLCPNSTVSDVMELKAKHGYSGIPITDCGTMNGKLVGIVSSRDVSFVTDRGIKLSEIMTPREKLSVAKQGVSLHEANEILKETKKGKLPVVNDNDELVALIARTDLLKNHEYPNASKNPVSKQLLVGAAIGTRPEDRDRAAALVEAGVDVIVVDSSQGDSLYQIEIVKHLKETHEKLQVIAGNVVTPSQAIHLIQAGADGLRVGMGIGSICTTQEVCAVGRAQASAVFHVAKFARKYGVPILADGGIKSTGHITKALSLGAS…	100	0	gi|397566672|gb|EJK45149.1|	hypothetical protein THAOC_36256 [Thalassiosira oceanica]	60.2	0	sp|P20839|IMDH1_HUMAN	Inosine-5'-monophosphate dehydrogenase 1 OS=Homo sapiens GN=IMPDH1 PE=1 SV=2	568	0	COG0517	CBS domain	T	Signal transduction mechanisms	K00088|1|0.0|625|ccp:CHC_T00009518001| IMP dehydrogenase [EC:1.1.1.205]	GO:0006177//GMP biosynthetic process;GO:0055114//oxidation-reduction process	GO:0003938//IMP dehydrogenase activity;GO:0046872//metal ion binding	-
	10	EJK49021.1	hypothetical protein THAOC_32138 [Thalassiosira oceanica]	24312.5	0.213	1.37	0.063	0.0008032	0.284962	EJK49021.1	MALLPKKEKAGKEKRRGGRRPETTVAVRSAGAASSKLSLGLLSATGAAVTAYQFRQPPASCDKLPVHGIAGTNQERTFLAVKPDGVQRGLVGDIIARFEKRGYKLVGLKLVWPTLEMAQNHYADLSKKPFYPGLCKFFSSGPIVCMCWEGKDIINQGRQMLGETQPLASKPGSIRGDFSIDLGRNICHGSDSPEAAAHELAMWFPEGVNDWAKTVDAWVYE	100	4e-131	gi|397574083|gb|EJK49021.1|	hypothetical protein THAOC_32138 [Thalassiosira oceanica]	59.6	5e-65	sp|Q9UUY8|NDK_NEUCR	Nucleoside diphosphate kinase OS=Neurospora crassa (strain ATCC 24698 / 74-OR23-1A / CBS 708.71 / DSM 1257 / FGSC 987) GN=ndk-1 PE=2 SV=2	197	5e-63	COG0105	Nucleoside diphosphate kinase	F	Nucleotide transport and metabolism	K00940|1|3e-64|199|atr:18429227| nucleoside-diphosphate kinase [EC:2.7.4.6]	GO:0006165//nucleoside diphosphate phosphorylation;GO:0006228//UTP biosynthetic process;GO:0006183//GTP biosynthetic process;GO:0006241//CTP biosynthetic process	GO:0004550//nucleoside diphosphate kinase activity;GO:0005524//ATP binding	GO:0005737//cytoplasm
	11	EJK44077.1	hypothetical protein THAOC_37410, partial [Thalassiosira oceanica]	36275.5	0.04	1.26	0.109	0.01292	0.422485	EJK44077.1	EGDSVLYATAARDKDTRDLDFLPLSVDHQERFSSAGLTSGAFNKRDGRPAEHEILVCRLIDRPLRPLIADGWRHETQLLSWVLSYDGERTCDPLAITASAAALWLSDVPLKKPVAAAMVGYVDGRLVMNPTLEQMEHSRLHLIVAGTEDAVLMIEGAADFLPEALMVEAVSFGHEAIKLQCAALEELAKVAGKEKKYDTIKTPPEGIQTAVDEAYAADVDKLYSGSMTKKELSTAQSELSKRVTEEMEELFPEETAAVKSAYKDLMCRRIFQLGKTEGVRIDGRRLDEVRPIDSEAGLLPRVHGSALFTRGETQTVATATLGDSGMKQK	100	0	gi|397564132|gb|EJK44077.1|	hypothetical protein THAOC_37410, partial [Thalassiosira oceanica]	45.05	1e-84	sp|Q6MDI2|PNP_PARUW	Polyribonucleotide nucleotidyltransferase OS=Protochlamydia amoebophila (strain UWE25) GN=pnp PE=3 SV=2	283	3e-88	COG1185	Polyribonucleotide nucleotidyltransferase (polynucleotide phosphorylase)	J	Translation, ribosomal structure and biogenesis	K00962|1|3e-81|268|nnu:104604160| polyribonucleotide nucleotidyltransferase [EC:2.7.7.8]	GO:0006402//mRNA catabolic process;GO:0006396//RNA processing	GO:0004654//polyribonucleotide nucleotidyltransferase activity;GO:0003723//RNA binding;GO:0000175//3'-5'-exoribonuclease activity	GO:0005737//cytoplasm
	12	XP_002286746.1	hypothetical protein THAPSDRAFT_1326 [Thalassiosira pseudonana CCMP1335]	45770.7	0.181	1.36	0.223	0.03342	0.735528	XP_002286746.1	MTRGLSTSRVVADSVFAPVGRVAGTQLEAAKQTPHGGTLVDLILKTDAEKEAAIAKCSKELQLTPRQLCDVELIMNGGFSPLTSFMDESTYKHVVDNVALPDGLIFGLPVVFDTDDEDLQPGDMVLLKDGDRAIATVEFTDKYMPNKAYECKQCYGTSEIEHPGSLMVATERGKYYMGGKITGLNLPIRDFPCKTPAEVRETLPDDVDVVAFQCRNPVHRAHYELFTRALDDPLVGEGGVVLVHPTCGPTQADDIPGVVRYKTYEVLKEETHNDRTRWEYLPYSMHMAGPREAIQHMMIRKNFGCTHFIIGRDMAGSKSSVTGEDYYGAYDAQDFAKEKGPELGVTPVPSLNLVYTEEEGYVTADEAKERGLNEKKLSGTKFRQMLRGGEDIPEWFAFK…	100	0	gi|223994125|ref|XP_002286746.1|	hypothetical protein THAPSDRAFT_1326 [Thalassiosira pseudonana CCMP1335]	39.47	2e-85	sp|P78937|MET3_SCHPO	Sulfate adenylyltransferase OS=Schizosaccharomyces pombe (strain 972 / ATCC 24843) GN=sua1 PE=1 SV=2	505	5e-178	COG2046	ATP sulfurylase (sulfate adenylyltransferase)	P	Inorganic ion transport and metabolism	K00958|1|0.0|538|csl:COCSUDRAFT_66886| sulfate adenylyltransferase [EC:2.7.7.4]	GO:0000103//sulfate assimilation	GO:0004781//sulfate adenylyltransferase (ATP) activity	-
